# Supplementary material for: Low XIST expression in Sertoli cells of Klinefelter syndrome patients causes high susceptibility of these cells to an extra X chromosome
Source: PubMed Central journal article supplement — Asian J Androl. 2023 May 16;25(6):662–73. doi: 10.4103/aja202315 (PMC10715603; doi:10.4103/aja202315), 2023-05-16
Supplement: AJA-25-662_Suppl5.pdf [file AJA-25-662_Suppl5.pdf]

Supplementary Table 1: DEGs of each cell cluster in normal state

logFC&gt;0.5

|           | p_val     | avg_logFC   | pct.1 | pct.2 | p_val_adj | P1/P2       | cluster        | gene     |
|-----------|-----------|-------------|-------|-------|-----------|-------------|----------------|----------|
| CD741     | 0         | 4.589360307 | 0.939 | 0.07  | 0         | 13.41428571 | macrophages    | CD74     |
| CXCL8     | 0         | 4.335967189 | 0.842 | 0.024 | 0         | 35.08333333 | macrophages    | CXCL8    |
| HLA.DRA   | 0         | 4.081392803 | 0.552 | 0.018 | 0         | 30.66666667 | macrophages    | HLA.DRA  |
| CCL3L3    | 0         | 4.004574474 | 0.811 | 0.023 | 0         | 35.26086957 | macrophages    | CCL3L3   |
| CCL4L2    | 0         | 3.863038733 | 0.811 | 0.017 | 0         | 47.70588235 | macrophages    | CCL4L2   |
| IL1B      | 0         | 3.839781479 | 0.788 | 0.015 | 0         | 52.53333333 | macrophages    | IL1B     |
| CCL3      | 0         | 3.810209385 | 0.788 | 0.011 | 0         | 71.63636364 | macrophages    | CCL3     |
| HLA-DRA1  | 6.35E-294 | 3.715834332 | 0.384 | 0.026 | 3.90E-289 | 1.48E+01    | macrophages    | HLA-DRA  |
| TAGLN1    | 0         | 3.6510815   | 0.941 | 0.129 | 0         | 7.294573643 | VSM_cells      | TAGLN    |
| DCN       | 0         | 3.633166533 | 0.98  | 0.12  | 0         | 8.166666667 | Leydig_cells   | DCN      |
| CFD       | 0         | 3.521249703 | 0.894 | 0.057 | 0         | 15.68421053 | Leydig_cells   | CFD      |
| TPSB2     | 7.87E-60  | 3.477935867 | 0.34  | 0.02  | 4.83E-55  | 1.70E+01    | mastocyte      | TPSB2    |
| HLA.DRB11 | 0         | 3.378041701 | 0.556 | 0.051 | 0         | 10.90196078 | macrophages    | HLA.DRB1 |
| SRGN1     | 0         | 3.360395466 | 0.889 | 0.046 | 0         | 19.32608696 | macrophages    | SRGN     |
| CCL4      | 0         | 3.278722374 | 0.731 | 0.056 | 0         | 13.05357143 | macrophages    | CCL4     |
| ADIRF2    | 0         | 3.248291087 | 0.877 | 0.118 | 0         | 7.43220339  | VSM_cells      | ADIRF    |
| CXCL31    | 0         | 3.207505116 | 0.71  | 0.024 | 0         | 29.58333333 | macrophages    | CXCL3    |
| B2M5      | 2.42E-37  | 3.127936516 | 0.947 | 0.252 | 1.48E-32  | 3.76E+00    | T_cells        | B2M      |
| CCL5      | 0         | 3.112461415 | 0.763 | 0.006 | 0         | 127.1666667 | T_cells        | CCL5     |
| HLA.DPA1  | 0         | 3.111717823 | 0.539 | 0.008 | 0         | 67.375      | macrophages    | HLA.DPA1 |
| MGP       | 0         | 3.032405707 | 0.913 | 0.157 | 0         | 5.815286624 | endotheliocyte | MGP      |
| RGS1      | 0         | 3.005160059 | 0.768 | 0.005 | 0         | 153.6       | macrophages    | RGS1     |
| CXCL21    | 0         | 3.001068413 | 0.774 | 0.042 | 0         | 18.42857143 | macrophages    | CXCL2    |
| TPM21     | 0         | 2.99208043  | 0.909 | 0.137 | 0         | 6.635036496 | VSM_cells      | TPM2     |
| GPR183    | 0         | 2.983887021 | 0.781 | 0.006 | 0         | 130.1666667 | macrophages    | GPR183   |
| B2M       | 0         | 2.972316038 | 0.985 | 0.242 | 0         | 4.070247934 | endotheliocyte | B2M      |
| TNFAIP31  | 0         | 2.95978865  | 0.815 | 0.109 | 0         | 7.47706422  | macrophages    | TNFAIP3  |
| CCL41     | 1.82E-31  | 2.931540681 | 0.5   | 0.063 | 1.12E-26  | 7.94E+00    | T_cells        | CCL4     |
| SELE      | 0         | 2.915731036 | 0.598 | 0.009 | 0         | 66.44444444 | endotheliocyte | SELE     |
| NFKBIA1   | 2.75E-242 | 2.859832344 | 0.855 | 0.207 | 1.69E-237 | 4.13E+00    | macrophages    | NFKBIA   |
| IL32      | 1.25E-204 | 2.849971491 | 0.763 | 0.023 | 7.65E-200 | 3.32E+01    | T_cells        | IL32     |
| PTGDS     | 0         | 2.849301788 | 0.991 | 0.666 | 0         | 1.487987988 | Leydig_cells   | PTGDS    |
| PTGDS1    | 0         | 2.844915854 | 0.979 | 0.664 | 0         | 1.47439759  | PTM_cells      | PTGDS    |
| SPARCL1   | 0         | 2.836369742 | 0.96  | 0.155 | 0         | 6.193548387 | endotheliocyte | SPARCL1  |
| CD83      | 0         | 2.835161206 | 0.828 | 0.063 | 0         | 13.14285714 | macrophages    | CD83     |
| HLA.DQA1  | 0         | 2.811853558 | 0.508 | 0.004 | 0         | 127         | macrophages    | HLA.DQA1 |
| HLA-DPB11 | 1.78E-213 | 2.806914001 | 0.357 | 0.032 | 1.09E-208 | 1.12E+01    | macrophages    | HLA-DPB1 |
| ACTA2     | 0         | 2.784577725 | 0.912 | 0.149 | 0         | 6.120805369 | PTM_cells      | ACTA2    |
| KLF61     | 7.89E-195 | 2.760582322 | 0.865 | 0.285 | 4.84E-190 | 3.04E+00    | macrophages    | KLF6     |
| HLA-DPA11 | 8.53E-263 | 2.737647298 | 0.347 | 0.024 | 5.23E-258 | 1.45E+01    | macrophages    | HLA-DPA1 |
| HLA.DPB1  | 0         | 2.69855066  | 0.542 | 0.005 | 0         | 108.4       | macrophages    | HLA.DPB1 |
| HLA-DRB11 | 1.36E-34  | 2.696634654 | 0.357 | 0.15  | 8.33E-30  | 2.38E+00    | macrophages    | HLA-DRB1 |
| MYH111    | 0         | 2.686007961 | 0.937 | 0.184 | 0         | 5.092391304 | VSM_cells      | MYH11    |
| HLA.DRB5  | 0         | 2.678477625 | 0.471 | 0.015 | 0         | 31.4        | macrophages    | HLA.DRB5 |
| ACTA21    | 0         | 2.662911479 | 0.924 | 0.174 | 0         | 5.310344828 | VSM_cells      | ACTA2    |
| RNASE12   | 0         | 2.660771869 | 0.733 | 0.101 | 0         | 7.257425743 | Sertoli_cells  | RNASE1   |
| S100A44   | 4.60E-90  | 2.651859632 | 0.763 | 0.053 | 2.82E-85  | 1.44E+01    | T_cells        | S100A4   |
| APOA1     | 0         | 2.644927727 | 0.742 | 0.108 | 0         | 6.87037037  | Sertoli_cells  | APOA1    |
| NLRP3     | 0         | 2.634359563 | 0.7   | 0.007 | 0         | 100         | macrophages    | NLRP3    |
| IGFBP72   | 0         | 2.623014649 | 0.957 | 0.253 | 0         | 3.782608696 | PTM_cells      | IGFBP7   |
| GADD45B4  | 0         | 2.618912838 | 0.848 | 0.181 | 0         | 4.685082873 | VSM_cells      | GADD45B  |
| B2M1      | 1.20E-272 | 2.609591997 | 0.963 | 0.245 | 7.35E-268 | 3.93E+00    | macrophages    | B2M      |
| NKG7      | 0         | 2.569689226 | 0.579 | 0.001 | 0         | 579         | T_cells        | NKG7     |
| TM4SF1    | 0         | 2.568463225 | 0.921 | 0.073 | 0         | 12.61643836 | endotheliocyte | TM4SF1   |
| PLPP3     | 0         | 2.56828911  | 0.899 | 0.089 | 0         | 10.1011236  | Leydig_cells   | PLPP3    |
| TPSAB1    | 0         | 2.561304711 | 0.3   | 0.002 | 0         | 150         | mastocyte      | TPSAB1   |
| FATE1     | 0         | 2.547521129 | 0.81  | 0.068 | 0         | 11.91176471 | Sertoli_cells  | FATE1    |
| HLA.DQB1  | 0         | 2.528569358 | 0.502 | 0.021 | 0         | 23.9047619  | macrophages    | HLA.DQB1 |
| HLA-E     | 0         | 2.505912549 | 0.72  | 0.079 | 0         | 9.113924051 | endotheliocyte | HLA-E    |
| TMSB4X5   | 6.97E-31  | 2.505174793 | 0.974 | 0.338 | 4.28E-26  | 2.88E+00    | T_cells        | TMSB4X   |
| GZMA      | 0         | 2.500833935 | 0.632 | 0.001 | 0         | 632         | T_cells        | GZMA     |
| DEFB119   | 0         | 2.498591255 | 0.761 | 0.117 | 0         | 6.504273504 | Sertoli_cells  | DEFB119  |
| CLU1      | 3.66E-303 | 2.498270374 | 0.746 | 0.657 | 2.25E-298 | 1.14E+00    | Sertoli_cells  | CLU      |
| MYL91     | 0         | 2.486523818 | 0.905 | 0.15  | 0         | 6.033333333 | VSM_cells      | MYL9     |
| TMSB4X    | 3.33E-302 | 2.476110042 | 0.975 | 0.329 | 2.05E-297 | 2.96E+00    | endotheliocyte | TMSB4X   |
| FTL1      | 1.08E-161 | 2.470003802 | 0.963 | 0.523 | 6.62E-157 | 1.84E+00    | macrophages    | FTL      |
| TMSB104   | 0         | 2.468101568 | 0.913 | 0.363 | 0         | 2.515151515 | Sertoli_cells  | TMSB10   |
| CXCR41    | 6.58E-213 | 2.451229727 | 0.658 | 0.016 | 4.04E-208 | 4.11E+01    | T_cells        | CXCR4    |
| HLA-B2    | 6.07E-24  | 2.450813932 | 0.789 | 0.253 | 3.72E-19  | 3.12E+00    | T_cells        | HLA-B    |
| APOE1     | 0         | 2.44562663  | 0.795 | 0.159 | 0         | 5           | PTM_cells      | APOE     |
| CITED1    | 0         | 2.439601543 | 0.786 | 0.066 | 0         | 11.90909091 | Sertoli_cells  | CITED1   |

|           |           |             |       |       |           |             |                |          |
|-----------|-----------|-------------|-------|-------|-----------|-------------|----------------|----------|
| VIM4      | 1.40E-261 | 2.42576747  | 0.943 | 0.444 | 8.58E-257 | 2.12E+00    | VSM_cells      | VIM      |
| CALD12    | 0         | 2.42188149  | 0.937 | 0.227 | 0         | 4.127753304 | VSM_cells      | CALD1    |
| ANXA11    | 0         | 2.42010897  | 0.724 | 0.075 | 0         | 9.653333333 | macrophages    | ANXA1    |
| NR4A21    | 1.15E-295 | 2.413191552 | 0.811 | 0.143 | 7.05E-291 | 5.67E+00    | macrophages    | NR4A2    |
| TYROBP    | 0         | 2.409168261 | 0.815 | 0.004 | 0         | 203.75      | macrophages    | TYROBP   |
| HLA-C5    | 6.34E-30  | 2.402507709 | 0.763 | 0.177 | 3.89E-25  | 4.31E+00    | T_cells        | HLA-C    |
| HLA-A4    | 8.43E-19  | 2.402281545 | 0.763 | 0.309 | 5.17E-14  | 2.47E+00    | T_cells        | HLA-A    |
| C11orf962 | 0         | 2.396933686 | 0.871 | 0.266 | 0         | 3.27443609  | VSM_cells      | C11orf96 |
| MYH11     | 0         | 2.388047245 | 0.894 | 0.161 | 0         | 5.552795031 | PTM_cells      | MYH11    |
| C1QA      | 0         | 2.381767492 | 0.68  | 0.002 | 0         | 340         | macrophages    | C1QA     |
| C5AR1     | 0         | 2.38172501  | 0.633 | 0.017 | 0         | 37.23529412 | macrophages    | C5AR1    |
| VWF       | 0         | 2.37655757  | 0.878 | 0.037 | 0         | 23.72972973 | endotheliocyte | VWF      |
| MALAT15   | 5.11E-19  | 2.363279102 | 1     | 0.838 | 3.14E-14  | 1.19E+00    | T_cells        | MALAT1   |
| NFKBIZ1   | 0         | 2.361850579 | 0.801 | 0.101 | 0         | 7.930693069 | macrophages    | NFKBIZ   |
| CD691     | 7.98E-38  | 2.357795113 | 0.18  | 0.009 | 4.90E-33  | 2.00E+01    | mastocyte      | CD69     |
| IFI27     | 0         | 2.352623412 | 0.903 | 0.123 | 0         | 7.341463415 | endotheliocyte | IFI27    |
| SFRP1     | 0         | 2.343317747 | 0.822 | 0.073 | 0         | 11.26027397 | Leydig_cells   | SFRP1    |
| IGFBP52   | 0         | 2.326690954 | 0.751 | 0.06  | 0         | 12.51666667 | VSM_cells      | IGFBP5   |
| MIR202HG  | 0         | 2.322044523 | 0.701 | 0.05  | 0         | 14.02       | Sertoli_cells  | MIR202HG |
| MT.RNR11  | 3.55E-43  | 2.321435368 | 0.346 | 0.279 | 2.18E-38  | 1.24E+00    | Sertoli_cells  | MT.RNR1  |
| CAV1      | 0         | 2.318789327 | 0.906 | 0.094 | 0         | 9.638297872 | endotheliocyte | CAV1     |
| TXNIP     | 0         | 2.318291856 | 0.913 | 0.163 | 0         | 5.601226994 | endotheliocyte | TXNIP    |
| FTH1P10   | 7.89E-99  | 2.315698459 | 0.539 | 0.158 | 4.84E-94  | 3.41E+00    | macrophages    | FTH1P10  |
| ZFP362    | 0         | 2.314730368 | 0.867 | 0.217 | 0         | 3.995391705 | Leydig_cells   | ZFP36    |
| IGF1      | 0         | 2.3134078   | 0.836 | 0.054 | 0         | 15.48148148 | Leydig_cells   | IGF1     |
| CD52      | 0         | 2.301475966 | 0.684 | 0.004 | 0         | 171         | T_cells        | CD52     |
| SAT11     | 6.92E-271 | 2.294417693 | 0.815 | 0.15  | 4.24E-266 | 5.43E+00    | macrophages    | SAT1     |
| IER31     | 2.18E-255 | 2.287986297 | 0.68  | 0.103 | 1.34E-250 | 6.60E+00    | macrophages    | IER3     |
| FLNA2     | 0         | 2.282760011 | 0.856 | 0.106 | 0         | 8.075471698 | VSM_cells      | FLNA     |
| EMP1      | 0         | 2.28237729  | 0.866 | 0.049 | 0         | 17.67346939 | endotheliocyte | EMP1     |
| HLA-B     | 4.73E-184 | 2.279582731 | 0.72  | 0.246 | 2.90E-179 | 2.93E+00    | endotheliocyte | HLA-B    |
| COL1A2    | 0         | 2.277689388 | 0.915 | 0.151 | 0         | 6.059602649 | Leydig_cells   | COL1A2   |
| RERGL     | 0         | 2.273889949 | 0.715 | 0.013 | 0         | 55          | VSM_cells      | RERGL    |
| COL1A1    | 0         | 2.271752036 | 0.862 | 0.099 | 0         | 8.707070707 | Leydig_cells   | COL1A1   |
| GNG11     | 0         | 2.268270205 | 0.841 | 0.044 | 0         | 19.11363636 | endotheliocyte | GNG11    |
| TMSB4X1   | 1.10E-194 | 2.264526486 | 0.949 | 0.332 | 6.72E-190 | 2.86E+00    | macrophages    | TMSB4X   |
| BCL2A1    | 0         | 2.257895857 | 0.599 | 0.015 | 0         | 39.93333333 | macrophages    | BCL2A1   |
| RGS2      | 2.38E-220 | 2.2522595   | 0.694 | 0.133 | 1.46E-215 | 5.22E+00    | macrophages    | RGS2     |
| PLAUR     | 0         | 2.248061266 | 0.714 | 0.024 | 0         | 29.75       | macrophages    | PLAUR    |
| IGF21     | 0         | 2.247648276 | 0.816 | 0.04  | 0         | 20.4        | Leydig_cells   | IGF2     |
| MALAT14   | 1.04E-173 | 2.246974741 | 0.953 | 0.836 | 6.37E-169 | 1.14E+00    | VSM_cells      | MALAT1   |
| DSTN1     | 3.21E-224 | 2.246848528 | 0.909 | 0.555 | 1.97E-219 | 1.64E+00    | VSM_cells      | DSTN     |
| IER24     | 0         | 2.246074872 | 0.841 | 0.168 | 0         | 5.005952381 | VSM_cells      | IER2     |
| IGFBP71   | 0         | 2.236594021 | 0.976 | 0.257 | 0         | 3.79766537  | Leydig_cells   | IGFBP7   |
| LTBP4     | 0         | 2.231985259 | 0.92  | 0.127 | 0         | 7.244094488 | Leydig_cells   | LTBP4    |
| TMSB4X3   | 0         | 2.229472121 | 0.946 | 0.307 | 0         | 3.081433225 | PTM_cells      | TMSB4X   |
| CCL2      | 0         | 2.228119092 | 0.603 | 0.038 | 0         | 15.86842105 | endotheliocyte | CCL2     |
| FOS2      | 0         | 2.227875991 | 0.924 | 0.286 | 0         | 3.230769231 | Leydig_cells   | FOS      |
| FN1       | 0         | 2.226875955 | 0.702 | 0.077 | 0         | 9.116883117 | endotheliocyte | FN1      |
| O2-Jun    | 0         | 2.221026079 | 0.928 | 0.346 | 0         | 2.682080925 | Leydig_cells   | JUN      |
| HMG5      | 0         | 2.212928893 | 0.702 | 0.052 | 0         | 13.5        | Sertoli_cells  | HMG5     |
| VIM2      | 0         | 2.212831794 | 0.98  | 0.429 | 0         | 2.284382284 | Leydig_cells   | VIM      |
| FHL21     | 0         | 2.204024482 | 0.816 | 0.079 | 0         | 10.32911392 | PTM_cells      | FHL2     |
| MYL9      | 0         | 2.197610697 | 0.85  | 0.128 | 0         | 6.640625    | PTM_cells      | MYL9     |
| VIM       | 1.14E-253 | 2.189873203 | 0.983 | 0.444 | 7.01E-249 | 2.21E+00    | endotheliocyte | VIM      |
| S100A4    | 0         | 2.188441483 | 0.724 | 0.046 | 0         | 15.73913043 | macrophages    | S100A4   |
| LYZ       | 0         | 2.184696671 | 0.653 | 0.003 | 0         | 217.6666667 | macrophages    | LYZ      |
| HLA-C     | 3.12E-244 | 2.17739278  | 0.705 | 0.17  | 1.91E-239 | 4.15E+00    | endotheliocyte | HLA-C    |
| RGS5      | 2.42E-140 | 2.175761577 | 0.467 | 0.123 | 1.48E-135 | 3.80E+00    | VSM_cells      | RGS5     |
| TPM2      | 0         | 2.160595245 | 0.846 | 0.115 | 0         | 7.356521739 | PTM_cells      | TPM2     |
| SRGN3     | 2.47E-99  | 2.157558697 | 0.816 | 0.054 | 1.52E-94  | 1.51E+01    | T_cells        | SRGN     |
| MT2A3     | 1.90E-298 | 2.153642436 | 0.82  | 0.222 | 1.17E-293 | 3.69E+00    | VSM_cells      | MT2A     |
| DLK1      | 0         | 2.144193788 | 0.479 | 0.103 | 0         | 4.650485437 | Leydig_cells   | DLK1     |
| FTH11     | 8.89E-143 | 2.140501428 | 0.98  | 0.72  | 5.45E-138 | 1.36E+00    | macrophages    | FTH1     |
| HIST1H4C  | 0         | 2.137783371 | 0.648 | 0.133 | 0         | 4.872180451 | spermatogonia  | HIST1H4C |
| MS4A6A    | 0         | 2.135819205 | 0.724 | 0.005 | 0         | 144.8       | macrophages    | MS4A6A   |
| ENG2      | 0         | 2.132021529 | 0.848 | 0.072 | 0         | 11.77777778 | PTM_cells      | ENG      |
| CD692     | 0         | 2.124532088 | 0.684 | 0.008 | 0         | 85.5        | T_cells        | CD69     |
| RPL10     | 4.34E-256 | 2.116374222 | 0.96  | 0.357 | 2.66E-251 | 2.69E+00    | endotheliocyte | RPL10    |
| SOCS32    | 0         | 2.109417199 | 0.717 | 0.1   | 0         | 7.17        | Leydig_cells   | SOCS3    |
| RGS162    | 0         | 2.108192889 | 0.457 | 0.051 | 0         | 8.960784314 | VSM_cells      | RGS16    |
| HLA.E1    | 1.22E-269 | 2.104158287 | 0.532 | 0.058 | 7.47E-265 | 9.17E+00    | macrophages    | HLA.E    |
| CD3D      | 0         | 2.102635672 | 0.632 | 0.006 | 0         | 105.3333333 | T_cells        | CD3D     |
| CLDN5     | 0         | 2.102463603 | 0.663 | 0.013 | 0         | 51          | endotheliocyte | CLDN5    |
| CYBA1     | 2.88E-95  | 2.102251138 | 0.684 | 0.04  | 1.77E-90  | 1.71E+01    | T_cells        | CYBA     |

|           |           |             |       |       |           |             |                |          |
|-----------|-----------|-------------|-------|-------|-----------|-------------|----------------|----------|
| MCAM      | 0         | 2.099309356 | 0.799 | 0.028 | 0         | 28.53571429 | VSM_cells      | MCAM     |
| SERPINF1  | 0         | 2.098932582 | 0.889 | 0.118 | 0         | 7.533898305 | Leydig_cells   | SERPINF1 |
| DUSP11    | 1.27E-202 | 2.093974562 | 0.781 | 0.18  | 7.79E-198 | 4.34E+00    | macrophages    | DUSP1    |
| GZMK      | 1.43E-306 | 2.089078996 | 0.368 | 0.003 | 8.78E-302 | 1.23E+02    | T_cells        | GZMK     |
| HLA.E     | 1.19E-56  | 2.087502422 | 0.241 | 0.06  | 7.33E-52  | 4.02E+00    | endotheliocyte | HLA.E    |
| C1S       | 0         | 2.079599276 | 0.864 | 0.072 | 0         | 12          | Leydig_cells   | C1S      |
| FOSB2     | 0         | 2.06296444  | 0.859 | 0.321 | 0         | 2.676012461 | Leydig_cells   | FOSB     |
| GSN       | 0         | 2.062933943 | 0.94  | 0.205 | 0         | 4.585365854 | endotheliocyte | GSN      |
| SGK1      | 1.79E-177 | 2.061884473 | 0.7   | 0.173 | 1.10E-172 | 4.05E+00    | macrophages    | SGK1     |
| C1QB      | 0         | 2.056014741 | 0.556 | 0.002 | 0         | 278         | macrophages    | C1QB     |
| C1QC      | 0         | 2.051554057 | 0.552 | 0.002 | 0         | 276         | macrophages    | C1QC     |
| TRAC      | 2.02E-36  | 2.051321005 | 0.737 | 0.131 | 1.24E-31  | 5.63E+00    | T_cells        | TRAC     |
| A2M       | 0         | 2.048504704 | 0.873 | 0.103 | 0         | 8.475728155 | endotheliocyte | A2M      |
| HLA.B1    | 1.14E-127 | 2.04643206  | 0.532 | 0.121 | 7.02E-123 | 4.40E+00    | macrophages    | HLA.B    |
| TIMP32    | 0         | 2.040137855 | 0.861 | 0.142 | 0         | 6.063380282 | PTM_cells      | TIMP3    |
| LAPTM5    | 0         | 2.033019968 | 0.684 | 0.007 | 0         | 97.71428571 | macrophages    | LAPTM5   |
| SEPP1     | 3.86E-105 | 2.031029956 | 0.471 | 0.106 | 2.37E-100 | 4.44E+00    | macrophages    | SEPP1    |
| PTPRC1    | 2.01E-209 | 2.02977531  | 0.711 | 0.019 | 1.23E-204 | 3.74E+01    | T_cells        | PTPRC    |
| PLEK      | 0         | 2.028361081 | 0.65  | 0.012 | 0         | 54.16666667 | macrophages    | PLEK     |
| IER2      | 0         | 2.024419461 | 0.916 | 0.168 | 0         | 5.452380952 | endotheliocyte | IER2     |
| APOE      | 0         | 2.020922295 | 0.65  | 0.17  | 0         | 3.823529412 | Leydig_cells   | APOE     |
| CD14      | 0         | 2.017035062 | 0.613 | 0.01  | 0         | 61.3        | macrophages    | CD14     |
| FCER1A    | 0         | 2.015355891 | 0.438 | 0.002 | 0         | 219         | macrophages    | FCER1A   |
| TNP1      | 0         | 2.014407028 | 0.998 | 0.985 | 0         | 1.01319797  | spermatid      | TNP1     |
| SOCS3     | 0         | 2.00066955  | 0.878 | 0.115 | 0         | 7.634782609 | endotheliocyte | SOCS3    |
| SH3BGRL32 | 3.64E-27  | 1.991738794 | 0.789 | 0.214 | 2.24E-22  | 3.69E+00    | T_cells        | SH3BGRL3 |
| KLF2      | 0         | 1.990784025 | 0.861 | 0.158 | 0         | 5.449367089 | endotheliocyte | KLF2     |
| NFKBIA    | 0         | 1.987110308 | 0.886 | 0.204 | 0         | 4.343137255 | endotheliocyte | NFKBIA   |
| CST3      | 5.11E-164 | 1.982393292 | 0.963 | 0.426 | 3.13E-159 | 2.26E+00    | macrophages    | CST3     |
| FCER1G    | 0         | 1.979915598 | 0.613 | 0.005 | 0         | 122.6       | macrophages    | FCER1G   |
| HLA-DQA1  | 0         | 1.979835595 | 0.337 | 0.003 | 0         | 112.3333333 | macrophages    | HLA-DQA1 |
| RPL105    | 3.67E-23  | 1.978110654 | 0.921 | 0.365 | 2.25E-18  | 2.52E+00    | T_cells        | RPL10    |
| TAGLN     | 0         | 1.97718524  | 0.816 | 0.109 | 0         | 7.486238532 | PTM_cells      | TAGLN    |
| ID21      | 7.33E-256 | 1.975583075 | 0.717 | 0.119 | 4.50E-251 | 6.03E+00    | macrophages    | ID2      |
| TPM11     | 0         | 1.97354633  | 0.833 | 0.195 | 0         | 4.271794872 | VSM_cells      | TPM1     |
| ITM2B2    | 0         | 1.97121108  | 0.933 | 0.3   | 0         | 3.11        | Leydig_cells   | ITM2B    |
| S100A62   | 0         | 1.970358765 | 0.823 | 0.103 | 0         | 7.990291262 | Leydig_cells   | S100A6   |
| PRM2      | 0         | 1.966700491 | 0.999 | 0.99  | 0         | 1.009090909 | spermatid      | PRM2     |
| CCL4L21   | 1.57E-29  | 1.965608683 | 0.316 | 0.026 | 9.62E-25  | 1.22E+01    | T_cells        | CCL4L2   |
| C1R       | 0         | 1.96359901  | 0.808 | 0.058 | 0         | 13.93103448 | Leydig_cells   | C1R      |
| PPP1R15A1 | 3.57E-203 | 1.963287413 | 0.798 | 0.191 | 2.19E-198 | 4.18E+00    | macrophages    | PPP1R15A |
| CORO1A1   | 0         | 1.953718779 | 0.684 | 0.006 | 0         | 114         | T_cells        | CORO1A   |
| RPL104    | 5.56E-256 | 1.950458101 | 0.92  | 0.356 | 3.41E-251 | 2.58E+00    | VSM_cells      | RPL10    |
| COL6A2    | 0         | 1.94354344  | 0.865 | 0.092 | 0         | 9.402173913 | Leydig_cells   | COL6A2   |
| JUNB2     | 0         | 1.94322526  | 0.905 | 0.325 | 0         | 2.784615385 | Leydig_cells   | JUNB     |
| MT-ATP64  | 5.46E-217 | 1.942218328 | 0.907 | 0.426 | 3.35E-212 | 2.13E+00    | VSM_cells      | MT-ATP6  |
| RRAD      | 0         | 1.939779    | 0.693 | 0.049 | 0         | 14.14285714 | VSM_cells      | RRAD     |
| AIF1      | 0         | 1.938875441 | 0.657 | 0.002 | 0         | 328.5       | macrophages    | AIF1     |
| CXCL2     | 0         | 1.935127587 | 0.63  | 0.041 | 0         | 15.36585366 | endotheliocyte | CXCL2    |
| SPARCL13  | 0         | 1.931795612 | 0.909 | 0.154 | 0         | 5.902597403 | VSM_cells      | SPARCL1  |
| ZFP36L12  | 0         | 1.926547445 | 0.861 | 0.378 | 0         | 2.277777778 | Leydig_cells   | ZFP36L1  |
| TIMP12    | 0         | 1.925981891 | 0.816 | 0.135 | 0         | 6.044444444 | PTM_cells      | TIMP1    |
| CST7      | 0         | 1.923266112 | 0.658 | 0.001 | 0         | 658         | T_cells        | CST7     |
| AEBP11    | 0         | 1.919894138 | 0.806 | 0.058 | 0         | 13.89655172 | PTM_cells      | AEBP1    |
| IER3      | 0         | 1.919546682 | 0.782 | 0.099 | 0         | 7.898989899 | endotheliocyte | IER3     |
| XCL2      | 0         | 1.918746763 | 0.211 | 0     | 0         | #DIV/0!     | T_cells        | XCL2     |
| ARL4C1    | 1.24E-121 | 1.918466635 | 0.579 | 0.022 | 7.61E-117 | 2.63E+01    | T_cells        | ARL4C    |
| HLA-DRB51 | 7.74E-56  | 1.915584107 | 0.313 | 0.081 | 4.75E-51  | 3.86E+00    | macrophages    | HLA-DRB5 |
| KLRB1     | 0         | 1.912911661 | 0.368 | 0     | 0         | #DIV/0!     | T_cells        | KLRB1    |
| MT-ND14   | 1.23E-229 | 1.912284018 | 0.903 | 0.402 | 7.53E-225 | 2.25E+00    | VSM_cells      | MT-ND1   |
| ZFP36     | 6.38E-304 | 1.907966106 | 0.918 | 0.234 | 3.92E-299 | 3.92E+00    | endotheliocyte | ZFP36    |
| GZMH      | 0         | 1.894872657 | 0.553 | 0.001 | 0         | 553         | T_cells        | GZMH     |
| S100A64   | 0         | 1.893277911 | 0.708 | 0.123 | 0         | 5.756097561 | VSM_cells      | S100A6   |
| PI16      | 0         | 1.892281796 | 0.603 | 0.042 | 0         | 14.35714286 | Leydig_cells   | PI16     |
| KLF65     | 2.27E-18  | 1.891645619 | 0.789 | 0.291 | 1.39E-13  | 2.71E+00    | T_cells        | KLF6     |
| GADD45B   | 0         | 1.890745135 | 0.906 | 0.182 | 0         | 4.978021978 | endotheliocyte | GADD45B  |
| ARHGDI1   | 1.82E-83  | 1.889158055 | 0.632 | 0.039 | 1.12E-78  | 1.62E+01    | T_cells        | ARHGDI1  |
| TSC22D35  | 3.31E-29  | 1.888917216 | 0.711 | 0.147 | 2.03E-24  | 4.84E+00    | T_cells        | TSC22D3  |
| COPE      | 0         | 1.883784461 | 0.839 | 0.567 | 0         | 1.479717813 | Sertoli_cells  | COPE     |
| 03-Jun    | 0         | 1.882398457 | 0.853 | 0.346 | 0         | 2.465317919 | PTM_cells      | JUN      |
| KRT17     | 0         | 1.882168871 | 0.448 | 0.008 | 0         | 56          | PTM_cells      | KRT17    |
| SPARCL12  | 0         | 1.881156274 | 0.893 | 0.13  | 0         | 6.869230769 | PTM_cells      | SPARCL1  |
| PLN       | 0         | 1.870307559 | 0.759 | 0.176 | 0         | 4.3125      | VSM_cells      | PLN      |
| SMC3      | 0         | 1.868053418 | 0.779 | 0.316 | 0         | 2.465189873 | spermatogonia  | SMC3     |
| CXCR4     | 0         | 1.868015577 | 0.451 | 0.012 | 0         | 37.58333333 | macrophages    | CXCR4    |

|           |           |             |       |       |           |             |                |          |
|-----------|-----------|-------------|-------|-------|-----------|-------------|----------------|----------|
| ID1       | 0         | 1.857995236 | 0.685 | 0.064 | 0         | 10.703125   | endotheliocyte | ID1      |
| TEX101    | 0         | 1.857390898 | 0.57  | 0.134 | 0         | 4.253731343 | spermatogonia  | TEX101   |
| EPPIN     | 0         | 1.848749457 | 0.588 | 0.039 | 0         | 15.07692308 | Sertoli_cells  | EPPIN    |
| INSL3     | 0         | 1.846744554 | 0.461 | 0.098 | 0         | 4.704081633 | Leydig_cells   | INSL3    |
| MT-CYB4   | 4.36E-222 | 1.844598538 | 0.901 | 0.389 | 2.67E-217 | 2.32E+00    | VSM_cells      | MT-CYB   |
| KLF24     | 0         | 1.843926231 | 0.782 | 0.158 | 0         | 4.949367089 | VSM_cells      | KLF2     |
| CD74      | 0         | 1.842981435 | 0.898 | 0.067 | 0         | 13.40298507 | endotheliocyte | CD74     |
| GSTA1     | 0         | 1.840676848 | 0.652 | 0.061 | 0         | 10.68852459 | Sertoli_cells  | GSTA1    |
| EGR12     | 0         | 1.837154908 | 0.815 | 0.239 | 0         | 3.410041841 | Leydig_cells   | EGR1     |
| CILP      | 0         | 1.837022426 | 0.715 | 0.022 | 0         | 32.5        | Leydig_cells   | CILP     |
| CD3E      | 2.03E-223 | 1.836331227 | 0.579 | 0.012 | 1.25E-218 | 4.83E+01    | T_cells        | CD3E     |
| HLA-A     | 9.30E-139 | 1.834798312 | 0.712 | 0.303 | 5.70E-134 | 2.35E+00    | endotheliocyte | HLA-A    |
| JUNB      | 6.60E-250 | 1.834618804 | 0.955 | 0.34  | 4.05E-245 | 2.81E+00    | endotheliocyte | JUNB     |
| MGP1      | 0         | 1.83331472  | 0.883 | 0.137 | 0         | 6.445255474 | Leydig_cells   | MGP      |
| SMOC21    | 0         | 1.832348459 | 0.797 | 0.053 | 0         | 15.03773585 | PTM_cells      | SMOC2    |
| RPS4X     | 2.56E-245 | 1.830493807 | 0.95  | 0.34  | 1.57E-240 | 2.79E+00    | endotheliocyte | RPS4X    |
| RPL396    | 1.99E-23  | 1.829596079 | 0.868 | 0.282 | 1.22E-18  | 3.08E+00    | T_cells        | RPL39    |
| APOD      | 0         | 1.829458666 | 0.685 | 0.066 | 0         | 10.37878788 | Leydig_cells   | APOD     |
| MALAT13   | 5.19E-267 | 1.821771164 | 0.916 | 0.834 | 3.18E-262 | 1.10E+00    | PTM_cells      | MALAT1   |
| CD632     | 0         | 1.821037911 | 0.899 | 0.266 | 0         | 3.379699248 | Leydig_cells   | CD63     |
| WISP2     | 0         | 1.820496705 | 0.648 | 0.031 | 0         | 20.90322581 | Leydig_cells   | WISP2    |
| DPEP11    | 0         | 1.81505935  | 0.757 | 0.14  | 0         | 5.407142857 | PTM_cells      | DPEP1    |
| COL3A1    | 0         | 1.813938597 | 0.712 | 0.151 | 0         | 4.715231788 | Leydig_cells   | COL3A1   |
| MT.RNR22  | 1.60E-14  | 1.813507951 | 0.351 | 0.375 | 9.79E-10  | 9.36E-01    | Sertoli_cells  | MT.RNR2  |
| GSN2      | 0         | 1.81272577  | 0.762 | 0.192 | 0         | 3.96875     | Leydig_cells   | GSN      |
| MFGE81    | 0         | 1.811727984 | 0.82  | 0.08  | 0         | 10.25       | VSM_cells      | MFGE8    |
| CALD11    | 0         | 1.809779788 | 0.874 | 0.206 | 0         | 4.242718447 | PTM_cells      | CALD1    |
| TNFAIP32  | 1.66E-22  | 1.806902056 | 0.579 | 0.117 | 1.02E-17  | 4.95E+00    | T_cells        | TNFAIP3  |
| NR4A3     | 0         | 1.806387654 | 0.549 | 0.031 | 0         | 17.70967742 | macrophages    | NR4A3    |
| HLA-DQB1  | 4.81E-274 | 1.804545277 | 0.32  | 0.019 | 2.95E-269 | 1.68E+01    | macrophages    | HLA-DQB1 |
| PLAC9     | 0         | 1.797889685 | 0.686 | 0.061 | 0         | 11.24590164 | Leydig_cells   | PLAC9    |
| IFITM3    | 0         | 1.797374488 | 0.918 | 0.187 | 0         | 4.909090909 | endotheliocyte | IFITM3   |
| TIMP3     | 0         | 1.796963116 | 0.868 | 0.167 | 0         | 5.19760479  | endotheliocyte | TIMP3    |
| CCDC168   | 0         | 1.796779127 | 0.636 | 0.201 | 0         | 3.164179104 | spermatid      | CCDC168  |
| NAMPT1    | 8.62E-183 | 1.793723594 | 0.68  | 0.148 | 5.29E-178 | 4.59E+00    | macrophages    | NAMPT    |
| MT2A      | 2.70E-259 | 1.792798492 | 0.839 | 0.224 | 1.65E-254 | 3.75E+00    | endotheliocyte | MT2A     |
| S100A6    | 0         | 1.790828899 | 0.854 | 0.122 | 0         | 7           | endotheliocyte | S100A6   |
| HLA-E3    | 5.70E-43  | 1.790127976 | 0.684 | 0.088 | 3.50E-38  | 7.77E+00    | T_cells        | HLA-E    |
| ZFP36L21  | 3.80E-194 | 1.787303812 | 0.707 | 0.142 | 2.33E-189 | 4.98E+00    | macrophages    | ZFP36L2  |
| MT1E1     | 0         | 1.786292698 | 0.655 | 0.057 | 0         | 11.49122807 | VSM_cells      | MT1E     |
| FOS4      | 5.79E-248 | 1.785533705 | 0.886 | 0.303 | 3.55E-243 | 2.92E+00    | VSM_cells      | FOS      |
| MAFB      | 1.53E-305 | 1.77791731  | 0.572 | 0.06  | 9.41E-301 | 9.53E+00    | macrophages    | MAFB     |
| ACTB6     | 8.33E-18  | 1.777603755 | 0.947 | 0.587 | 5.11E-13  | 1.61E+00    | T_cells        | ACTB     |
| FTL2      | 0         | 1.77469336  | 0.943 | 0.51  | 0         | 1.849019608 | Leydig_cells   | FTL      |
| MYL63     | 2.02E-191 | 1.77227303  | 0.911 | 0.661 | 1.24E-186 | 1.38E+00    | VSM_cells      | MYL6     |
| CTSS      | 0         | 1.771926579 | 0.657 | 0.019 | 0         | 34.57894737 | macrophages    | CTSS     |
| BGN       | 0         | 1.771590992 | 0.749 | 0.058 | 0         | 12.9137931  | PTM_cells      | BGN      |
| ATF34     | 0         | 1.77145526  | 0.746 | 0.108 | 0         | 6.907407407 | VSM_cells      | ATF3     |
| IFITM32   | 0         | 1.771424231 | 0.908 | 0.167 | 0         | 5.437125749 | Leydig_cells   | IFITM3   |
| FOS       | 8.24E-241 | 1.767305581 | 0.931 | 0.304 | 5.06E-236 | 3.06E+00    | endotheliocyte | FOS      |
| NEAT1     | 2.98E-224 | 1.765348707 | 0.754 | 0.189 | 1.83E-219 | 3.99E+00    | endotheliocyte | NEAT1    |
| SERPINA5  | 0         | 1.764638177 | 0.56  | 0.17  | 0         | 3.294117647 | Sertoli_cells  | SERPINA5 |
| TRBC21    | 5.55E-44  | 1.762690812 | 0.474 | 0.041 | 3.40E-39  | 1.16E+01    | T_cells        | TRBC2    |
| JUNB4     | 6.65E-234 | 1.761869585 | 0.888 | 0.34  | 4.08E-229 | 2.61E+00    | VSM_cells      | JUNB     |
| ZFP36L2   | 0         | 1.761071986 | 0.854 | 0.138 | 0         | 6.188405797 | endotheliocyte | ZFP36L2  |
| CCL23     | 0         | 1.760798856 | 0.469 | 0.039 | 0         | 12.02564103 | VSM_cells      | CCL2     |
| BEX1      | 0         | 1.757474279 | 0.59  | 0.053 | 0         | 11.13207547 | Sertoli_cells  | BEX1     |
| SPARC2    | 0         | 1.756558311 | 0.875 | 0.217 | 0         | 4.032258065 | PTM_cells      | SPARC    |
| ANXA15    | 8.22E-50  | 1.755232064 | 0.711 | 0.082 | 5.04E-45  | 8.67E+00    | T_cells        | ANXA1    |
| SCRG1     | 0         | 1.75498241  | 0.507 | 0.065 | 0         | 7.8         | Sertoli_cells  | SCRG1    |
| CST33     | 0         | 1.751189061 | 0.753 | 0.41  | 0         | 1.836585366 | Sertoli_cells  | CST3     |
| ADAMTS11  | 0         | 1.750058172 | 0.62  | 0.068 | 0         | 9.117647059 | Leydig_cells   | ADAMTS1  |
| TCEAL41   | 0         | 1.749241869 | 0.807 | 0.161 | 0         | 5.01242236  | PTM_cells      | TCEAL4   |
| RPL102    | 0         | 1.747415614 | 0.942 | 0.34  | 0         | 2.770588235 | Leydig_cells   | RPL10    |
| JUNB6     | 1.08E-19  | 1.746437116 | 0.895 | 0.349 | 6.65E-15  | 2.56E+00    | T_cells        | JUNB     |
| DEFB123   | 0         | 1.738069001 | 0.527 | 0.023 | 0         | 22.91304348 | Sertoli_cells  | DEFB123  |
| MEG3      | 0         | 1.737314393 | 0.677 | 0.161 | 0         | 4.204968944 | Leydig_cells   | MEG3     |
| MT-ND34   | 1.19E-225 | 1.729594348 | 0.896 | 0.366 | 7.27E-221 | 2.45E+00    | VSM_cells      | MT-ND3   |
| SNHG7     | 1.37E-304 | 1.72828593  | 0.794 | 0.177 | 8.43E-300 | 4.49E+00    | endotheliocyte | SNHG7    |
| NR4A1     | 8.02E-128 | 1.726285447 | 0.758 | 0.256 | 4.92E-123 | 2.96E+00    | macrophages    | NR4A1    |
| NEAT13    | 0         | 1.725348958 | 0.65  | 0.174 | 0         | 3.735632184 | PTM_cells      | NEAT1    |
| ZFP361    | 8.31E-187 | 1.723357055 | 0.869 | 0.237 | 5.09E-182 | 3.67E+00    | macrophages    | ZFP36    |
| FCGR2A    | 0         | 1.722879297 | 0.643 | 0.045 | 0         | 14.28888889 | macrophages    | FCGR2A   |
| NR2F22    | 0         | 1.720345429 | 0.794 | 0.137 | 0         | 5.795620438 | PTM_cells      | NR2F2    |
| SERPING11 | 0         | 1.720103438 | 0.766 | 0.089 | 0         | 8.606741573 | Leydig_cells   | SERPING1 |

|               |             |             |       |       |           |             |                |               |
|---------------|-------------|-------------|-------|-------|-----------|-------------|----------------|---------------|
| MT-ND53       | 4.85E-259   | 1.715428962 | 0.877 | 0.287 | 2.98E-254 | 3.06E+00    | VSM_cells      | MT-ND5        |
| CRISPLD2      | 0           | 1.714912078 | 0.699 | 0.099 | 0         | 7.060606061 | Leydig_cells   | CRISPLD2      |
| PENK          | 1.06E-278   | 1.713390984 | 0.82  | 0.512 | 6.48E-274 | 1.60E+00    | Leydig_cells   | PENK          |
| EPAS1         | 0           | 1.712286748 | 0.779 | 0.074 | 0         | 10.52702703 | endotheliocyte | EPAS1         |
| AKAP4         | 0           | 1.711122018 | 0.779 | 0.364 | 0         | 2.14010989  | spermatid      | AKAP4         |
| 04-Jun        | 3.74E-209   | 1.707128986 | 0.882 | 0.362 | 2.29E-204 | 2.44E+00    | VSM_cells      | JUN           |
| AHNAK2        | 0           | 1.704105564 | 0.78  | 0.146 | 0         | 5.342465753 | Leydig_cells   | AHNAK         |
| ALDH1A11      | 0           | 1.702596773 | 0.629 | 0.096 | 0         | 6.552083333 | Sertoli_cells  | ALDH1A1       |
| COL6A1        | 0           | 1.702048661 | 0.786 | 0.092 | 0         | 8.543478261 | Leydig_cells   | COL6A1        |
| CLDN11        | 0           | 1.700853586 | 0.5   | 0.067 | 0         | 7.462686567 | Sertoli_cells  | CLDN11        |
| HLA.A1        | 3.29E-105   | 1.700070092 | 0.522 | 0.135 | 2.02E-100 | 3.87E+00    | macrophages    | HLA.A         |
| TCEAL5        | 0           | 1.698754185 | 0.576 | 0.036 | 0         | 16          | Sertoli_cells  | TCEAL5        |
| PNRC11        | 1.56E-128   | 1.698288589 | 0.852 | 0.393 | 9.56E-124 | 2.17E+00    | macrophages    | PNRC1         |
| SEPP11        | 0           | 1.69815959  | 0.808 | 0.079 | 0         | 10.2278481  | Leydig_cells   | SEPP1         |
| HSPA1A1       | 1.21E-65    | 1.694760997 | 0.694 | 0.36  | 7.42E-61  | 1.93E+00    | macrophages    | HSPA1A        |
| SERPINE2      | 0           | 1.693013509 | 0.783 | 0.147 | 0         | 5.326530612 | Leydig_cells   | SERPINE2      |
| ITGB2         | 0           | 1.692615818 | 0.616 | 0.003 | 0         | 205.3333333 | macrophages    | ITGB2         |
| RPL103        | 0           | 1.691891036 | 0.926 | 0.337 | 0         | 2.747774481 | PTM_cells      | RPL10         |
| SELM3         | 1.20E-284   | 1.691482505 | 0.776 | 0.208 | 7.38E-280 | 3.73E+00    | VSM_cells      | SELM          |
| TSC22D31      | 2.25E-153   | 1.69126961  | 0.626 | 0.142 | 1.38E-148 | 4.41E+00    | macrophages    | TSC22D3       |
| PTGS21        | 0           | 1.68912041  | 0.488 | 0.02  | 0         | 24.4        | macrophages    | PTGS2         |
| PRM1          | 0           | 1.688848862 | 0.997 | 0.974 | 0         | 1.023613963 | spermatid      | PRM1          |
| B2M2          | 0           | 1.687255989 | 0.957 | 0.222 | 0         | 4.310810811 | Leydig_cells   | B2M           |
| ANXA22        | 0           | 1.68348754  | 0.853 | 0.272 | 0         | 3.136029412 | Leydig_cells   | ANXA2         |
| CD34          | 0           | 1.682683964 | 0.801 | 0.057 | 0         | 14.05263158 | endotheliocyte | CD34          |
| LINC00919     | 0           | 1.681276077 | 0.76  | 0.417 | 0         | 1.822541966 | spermatid      | LINC00919     |
| MEG31         | 0           | 1.679783919 | 0.607 | 0.161 | 0         | 3.770186335 | PTM_cells      | MEG3          |
| PTRF          | 0           | 1.679371486 | 0.829 | 0.11  | 0         | 7.536363636 | endotheliocyte | PTRF          |
| PFN14         | 1.16E-11    | 1.677720232 | 0.737 | 0.409 | 7.12E-07  | 1.80E+00    | T_cells        | PFN1          |
| CD163         | 0           | 1.675680789 | 0.572 | 0.023 | 0         | 24.86956522 | macrophages    | CD163         |
| COL6A3        | 0           | 1.674790312 | 0.697 | 0.054 | 0         | 12.90740741 | Leydig_cells   | COL6A3        |
| MT1M1         | 0           | 1.67288586  | 0.666 | 0.025 | 0         | 26.64       | VSM_cells      | MT1M          |
| RHOB4         | 6.45E-270   | 1.672568679 | 0.822 | 0.231 | 3.95E-265 | 3.56E+00    | VSM_cells      | RHOB          |
| LBH           | 0           | 1.670013068 | 0.708 | 0.09  | 0         | 7.866666667 | VSM_cells      | LBH           |
| LELP1         | 0           | 1.668992653 | 0.939 | 0.81  | 0         | 1.159259259 | spermatid      | LELP1         |
| ANXA14        | 0.005486279 | 1.668256773 | 0.18  | 0.083 | 1         | 2.168674699 | mastocyte      | ANXA1         |
| HIST1H2AA     | 0           | 1.668180323 | 0.533 | 0.153 | 0         | 3.483660131 | spermatogonia  | HIST1H2AA     |
| FAM71A        | 0           | 1.667801309 | 0.714 | 0.252 | 0         | 2.833333333 | spermatid      | FAM71A        |
| FOSB1         | 3.10E-136   | 1.667658354 | 0.875 | 0.338 | 1.90E-131 | 2.59E+00    | macrophages    | FOSB          |
| OAZ3          | 0           | 1.666256471 | 0.859 | 0.498 | 0         | 1.724899598 | spermatid      | OAZ3          |
| TOP2A         | 0           | 1.665959043 | 0.693 | 0.239 | 0         | 2.89958159  | spermatogonia  | TOP2A         |
| TMSB10        | 2.08E-226   | 1.665554042 | 0.96  | 0.39  | 1.28E-221 | 2.46E+00    | endotheliocyte | TMSB10        |
| GADD45A       | 0           | 1.663365502 | 0.722 | 0.064 | 0         | 11.28125    | endotheliocyte | GADD45A       |
| FOS3          | 0           | 1.663146346 | 0.856 | 0.285 | 0         | 3.003508772 | PTM_cells      | FOS           |
| IGFBP3        | 2.27E-93    | 1.660222572 | 0.166 | 0.019 | 1.39E-88  | 8.74E+00    | endotheliocyte | IGFBP3        |
| ZFP364        | 3.05E-296   | 1.654008261 | 0.863 | 0.233 | 1.87E-291 | 3.70E+00    | VSM_cells      | ZFP36         |
| TIMP11        | 0           | 1.652399069 | 0.807 | 0.14  | 0         | 5.764285714 | Leydig_cells   | TIMP1         |
| OSR21         | 0           | 1.65191603  | 0.753 | 0.082 | 0         | 9.182926829 | PTM_cells      | OSR2          |
| C11orf961     | 0           | 1.650661529 | 0.778 | 0.251 | 0         | 3.099601594 | PTM_cells      | C11orf96      |
| COL15A11      | 0           | 1.649542125 | 0.677 | 0.106 | 0         | 6.386792453 | Leydig_cells   | COL15A1       |
| H19           | 0           | 1.647882654 | 0.282 | 0.024 | 0         | 11.75       | Leydig_cells   | H19           |
| PTGS2         | 0           | 1.644212345 | 0.484 | 0.018 | 0         | 26.88888889 | endotheliocyte | PTGS2         |
| HCST1         | 1.71E-161   | 1.644058887 | 0.605 | 0.018 | 1.05E-156 | 3.36E+01    | T_cells        | HCST          |
| FGL2          | 0           | 1.643122658 | 0.586 | 0.055 | 0         | 10.65454545 | macrophages    | FGL2          |
| ISLR1         | 0           | 1.639036081 | 0.651 | 0.05  | 0         | 13.02       | Leydig_cells   | ISLR          |
| MT-ND24       | 1.11E-215   | 1.635799339 | 0.905 | 0.404 | 6.82E-211 | 2.24E+00    | VSM_cells      | MT-ND2        |
| RP5-1023B21.1 | 0           | 1.634303983 | 0.569 | 0.318 | 0         | 1.789308176 | spermatocyte   | RP5-1023B21.1 |
| MYLK          | 0           | 1.632184269 | 0.761 | 0.168 | 0         | 4.529761905 | PTM_cells      | MYLK          |
| NR2F21        | 0           | 1.629218716 | 0.784 | 0.143 | 0         | 5.482517483 | Leydig_cells   | NR2F2         |
| ZCWPW1        | 0           | 1.62844774  | 0.719 | 0.257 | 0         | 2.79766537  | spermatogonia  | ZCWPW1        |
| LGALS11       | 0           | 1.628234752 | 0.821 | 0.177 | 0         | 4.638418079 | PTM_cells      | LGALS1        |
| TPM1          | 0           | 1.626326199 | 0.788 | 0.177 | 0         | 4.451977401 | PTM_cells      | TPM1          |
| RHOB          | 9.58E-265   | 1.621925627 | 0.876 | 0.232 | 5.88E-260 | 3.78E+00    | endotheliocyte | RHOB          |
| ISYNA1        | 2.21E-303   | 1.621428085 | 0.661 | 0.434 | 1.36E-298 | 1.52E+00    | Sertoli_cells  | ISYNA1        |
| CEBPD1        | 9.08E-183   | 1.620356599 | 0.603 | 0.108 | 5.57E-178 | 5.58E+00    | macrophages    | CEBPD         |
| ANGPTL1       | 0           | 1.618041373 | 0.708 | 0.034 | 0         | 20.82352941 | Leydig_cells   | ANGPTL1       |
| NEAT11        | 3.80E-84    | 1.61752173  | 0.599 | 0.193 | 2.33E-79  | 3.10E+00    | macrophages    | NEAT1         |
| LAPTM51       | 4.32E-172   | 1.617072371 | 0.553 | 0.014 | 2.65E-167 | 3.95E+01    | T_cells        | LAPTM5        |
| SH3RF2        | 0           | 1.616578892 | 0.875 | 0.517 | 0         | 1.69245648  | spermatid      | SH3RF2        |
| RAMP2         | 0           | 1.609266282 | 0.759 | 0.065 | 0         | 11.67692308 | endotheliocyte | RAMP2         |
| MCL11         | 6.55E-108   | 1.609226058 | 0.865 | 0.526 | 4.02E-103 | 1.64E+00    | macrophages    | MCL1          |
| MALAT12       | 6.12E-263   | 1.608386613 | 0.965 | 0.833 | 3.76E-258 | 1.16E+00    | Leydig_cells   | MALAT1        |
| MYL62         | 0           | 1.607100452 | 0.928 | 0.651 | 0         | 1.425499232 | PTM_cells      | MYL6          |
| LGALS12       | 0           | 1.603074074 | 0.839 | 0.197 | 0         | 4.258883249 | VSM_cells      | LGALS1        |
| AC007557.1    | 0           | 1.600462347 | 0.88  | 0.575 | 0         | 1.530434783 | spermatid      | AC007557.1    |

|          |           |             |       |       |           |             |                |          |
|----------|-----------|-------------|-------|-------|-----------|-------------|----------------|----------|
| TPT1     | 1.57E-192 | 1.599333585 | 0.983 | 0.857 | 9.61E-188 | 1.15E+00    | endotheliocyte | TPT1     |
| MT-ND44  | 7.99E-203 | 1.598543694 | 0.905 | 0.41  | 4.90E-198 | 2.21E+00    | VSM_cells      | MT-ND4   |
| PTPRC    | 0         | 1.598383553 | 0.569 | 0.014 | 0         | 40.64285714 | macrophages    | PTPRC    |
| SAT1     | 5.88E-298 | 1.598305134 | 0.777 | 0.148 | 3.61E-293 | 5.25E+00    | endotheliocyte | SAT1     |
| IGFBP7   | 9.58E-229 | 1.59761725  | 0.906 | 0.278 | 5.88E-224 | 3.26E+00    | endotheliocyte | IGFBP7   |
| DUSP1    | 5.45E-301 | 1.595661545 | 0.829 | 0.176 | 3.34E-296 | 4.71E+00    | endotheliocyte | DUSP1    |
| SLC9A3R2 | 1.61E-207 | 1.594084037 | 0.672 | 0.17  | 9.86E-203 | 3.95E+00    | endotheliocyte | SLC9A3R2 |
| CSRP11   | 0         | 1.592800308 | 0.744 | 0.106 | 0         | 7.018867925 | VSM_cells      | CSRP1    |
| CDKN1A   | 7.69E-306 | 1.591861843 | 0.717 | 0.122 | 4.72E-301 | 5.88E+00    | endotheliocyte | CDKN1A   |
| KLF22    | 0         | 1.590872697 | 0.711 | 0.145 | 0         | 4.903448276 | Leydig_cells   | KLF2     |
| MALAT1   | 2.34E-107 | 1.590765952 | 0.943 | 0.837 | 1.44E-102 | 1.13E+00    | endotheliocyte | MALAT1   |
| NUAK1    | 0         | 1.588474325 | 0.677 | 0.02  | 0         | 33.85       | endotheliocyte | NUAK1    |
| SNCG1    | 0         | 1.587402931 | 0.611 | 0.025 | 0         | 24.44       | VSM_cells      | SNCG     |
| JUNB3    | 0         | 1.587374251 | 0.842 | 0.324 | 0         | 2.598765432 | PTM_cells      | JUNB     |
| DUSP23   | 1.31E-42  | 1.585567918 | 0.526 | 0.051 | 8.06E-38  | 1.03E+01    | T_cells        | DUSP2    |
| ITM2A1   | 0         | 1.582789536 | 0.643 | 0.053 | 0         | 12.13207547 | Leydig_cells   | ITM2A    |
| IGFBP73  | 3.59E-287 | 1.582479946 | 0.928 | 0.276 | 2.20E-282 | 3.36E+00    | VSM_cells      | IGFBP7   |
| MT.ND32  | 4.08E-14  | 1.581382315 | 0.35  | 0.372 | 2.50E-09  | 9.41E-01    | Sertoli_cells  | MT.ND3   |
| LRRFIP1  | 0         | 1.580697332 | 0.784 | 0.082 | 0         | 9.56097561  | endotheliocyte | LRRFIP1  |
| RPL39    | 4.76E-227 | 1.580445091 | 0.881 | 0.273 | 2.92E-222 | 3.23E+00    | endotheliocyte | RPL39    |
| MGP2     | 0         | 1.577268781 | 0.859 | 0.133 | 0         | 6.458646617 | PTM_cells      | MGP      |
| SYCP3    | 0         | 1.576980764 | 0.685 | 0.256 | 0         | 2.67578125  | spermatogonia  | SYCP3    |
| CSF1R    | 0         | 1.576215485 | 0.545 | 0.026 | 0         | 20.96153846 | macrophages    | CSF1R    |
| IGFBP4   | 0         | 1.575891104 | 0.774 | 0.077 | 0         | 10.05194805 | endotheliocyte | IGFBP4   |
| CTGF     | 0         | 1.571751968 | 0.645 | 0.064 | 0         | 10.078125   | endotheliocyte | CTGF     |
| SOX17    | 0         | 1.568512826 | 0.663 | 0.041 | 0         | 16.17073171 | endotheliocyte | SOX17    |
| MS4A7    | 0         | 1.56799413  | 0.535 | 0.006 | 0         | 89.16666667 | macrophages    | MS4A7    |
| RHOB2    | 0         | 1.56337796  | 0.756 | 0.219 | 0         | 3.452054795 | Leydig_cells   | RHOB     |
| LGALS3BP | 0         | 1.562681949 | 0.763 | 0.091 | 0         | 8.384615385 | Leydig_cells   | LGALS3BP |
| MT.CO1   | 2.09E-114 | 1.561129478 | 0.392 | 0.326 | 1.28E-109 | 1.20E+00    | spermatogonia  | MT.CO1   |
| SMC1B    | 0         | 1.557804682 | 0.696 | 0.287 | 0         | 2.425087108 | spermatogonia  | SMC1B    |
| SRGN     | 0         | 1.557417248 | 0.752 | 0.044 | 0         | 17.09090909 | endotheliocyte | SRGN     |
| ID3      | 0         | 1.556311672 | 0.613 | 0.039 | 0         | 15.71794872 | endotheliocyte | ID3      |
| ZFP36L25 | 1.70E-24  | 1.556278636 | 0.684 | 0.148 | 1.05E-19  | 4.62E+00    | T_cells        | ZFP36L2  |
| HEMGN    | 0         | 1.555570117 | 0.762 | 0.286 | 0         | 2.664335664 | spermatid      | HEMGN    |
| LUM      | 0         | 1.554177451 | 0.389 | 0.022 | 0         | 17.68181818 | Leydig_cells   | LUM      |
| ITM2B3   | 0         | 1.553774535 | 0.864 | 0.299 | 0         | 2.889632107 | PTM_cells      | ITM2B    |
| CYBA     | 0         | 1.553744983 | 0.529 | 0.035 | 0         | 15.11428571 | macrophages    | CYBA     |
| OSR2     | 0         | 1.549235359 | 0.727 | 0.088 | 0         | 8.261363636 | Leydig_cells   | OSR2     |
| P2RY13   | 0         | 1.548824962 | 0.458 | 0.001 | 0         | 458         | macrophages    | P2RY13   |
| DUSP61   | 3.33E-125 | 1.54804193  | 0.438 | 0.08  | 2.04E-120 | 5.48E+00    | macrophages    | DUSP6    |
| BTG11    | 9.83E-71  | 1.546449127 | 0.798 | 0.609 | 6.03E-66  | 1.31E+00    | macrophages    | BTG1     |
| ODF1     | 0         | 1.546165614 | 0.691 | 0.436 | 0         | 1.584862385 | spermatid      | ODF1     |
| CST9L    | 0         | 1.544770258 | 0.46  | 0.017 | 0         | 27.05882353 | Sertoli_cells  | CST9L    |
| STK17B   | 2.01E-121 | 1.543343985 | 0.582 | 0.157 | 1.24E-116 | 3.71E+00    | macrophages    | STK17B   |
| EMP34    | 8.22E-26  | 1.543161979 | 0.711 | 0.164 | 5.04E-21  | 4.34E+00    | T_cells        | EMP3     |
| HMGB4    | 0         | 1.542191119 | 0.986 | 0.879 | 0         | 1.121729238 | spermatid      | HMGB4    |
| FOS1     | 2.20E-119 | 1.54216855  | 0.835 | 0.308 | 1.35E-114 | 2.71E+00    | macrophages    | FOS      |
| IGFBP6   | 0         | 1.54130405  | 0.487 | 0.08  | 0         | 6.0875      | Leydig_cells   | IGFBP6   |
| CAV13    | 0         | 1.539492586 | 0.801 | 0.094 | 0         | 8.521276596 | VSM_cells      | CAV1     |
| SYCP1    | 7.74E-270 | 1.538625933 | 0.564 | 0.413 | 4.75E-265 | 1.37E+00    | spermatogonia  | SYCP1    |
| COL15A12 | 0         | 1.534470703 | 0.738 | 0.099 | 0         | 7.454545455 | PTM_cells      | COL15A1  |
| HMG3     | 0         | 1.533685687 | 0.614 | 0.243 | 0         | 2.526748971 | Sertoli_cells  | HMG3     |
| MT-CO14  | 3.32E-190 | 1.533203665 | 0.905 | 0.445 | 2.03E-185 | 2.03E+00    | VSM_cells      | MT-CO1   |
| IFITM2   | 0         | 1.532415831 | 0.829 | 0.156 | 0         | 5.314102564 | endotheliocyte | IFITM2   |
| C10orf62 | 0         | 1.531866879 | 0.86  | 0.435 | 0         | 1.977011494 | spermatid      | C10orf62 |
| CLEC7A   | 0         | 1.531270952 | 0.549 | 0.006 | 0         | 91.5        | macrophages    | CLEC7A   |
| PRSS23   | 0         | 1.531088707 | 0.677 | 0.041 | 0         | 16.51219512 | endotheliocyte | PRSS23   |
| CCDC110  | 0         | 1.530789876 | 0.992 | 0.436 | 0         | 2.275229358 | spermatocyte   | CCDC110  |
| HLA.C1   | 4.11E-123 | 1.528681743 | 0.421 | 0.074 | 2.52E-118 | 5.69E+00    | macrophages    | HLA.C    |
| GZMM     | 0         | 1.528044205 | 0.5   | 0.005 | 0         | 100         | T_cells        | GZMM     |
| HSPB13   | 1.22E-270 | 1.526678344 | 0.803 | 0.212 | 7.45E-266 | 3.79E+00    | VSM_cells      | HSPB1    |
| TSSK6    | 0         | 1.525452937 | 0.762 | 0.309 | 0         | 2.466019417 | spermatid      | TSSK6    |
| RPS8     | 3.04E-176 | 1.522572512 | 0.96  | 0.773 | 1.87E-171 | 1.24E+00    | endotheliocyte | RPS8     |
| RPL12    | 1.75E-150 | 1.520915214 | 0.923 | 0.631 | 1.08E-145 | 1.46E+00    | endotheliocyte | RPL12    |
| HMGA1    | 0         | 1.520084631 | 0.532 | 0.088 | 0         | 6.045454545 | spermatogonia  | HMGA1    |
| RPL217   | 4.56E-16  | 1.517661792 | 0.921 | 0.477 | 2.80E-11  | 1.93E+00    | T_cells        | RPL21    |
| MGST33   | 0         | 1.51625884  | 0.651 | 0.211 | 0         | 3.085308057 | Sertoli_cells  | MGST3    |
| MYLK1    | 0         | 1.515664617 | 0.822 | 0.186 | 0         | 4.419354839 | VSM_cells      | MYLK     |
| S100A10  | 5.16E-161 | 1.515633186 | 0.866 | 0.434 | 3.17E-156 | 2.00E+00    | endotheliocyte | S100A10  |
| KLF42    | 2.04E-278 | 1.512084854 | 0.782 | 0.475 | 1.25E-273 | 1.65E+00    | Leydig_cells   | KLF4     |
| TMSB4X4  | 4.20E-229 | 1.509917426 | 0.886 | 0.329 | 2.58E-224 | 2.69E+00    | VSM_cells      | TMSB4X   |
| BGN1     | 0         | 1.50937704  | 0.687 | 0.081 | 0         | 8.481481481 | VSM_cells      | BGN      |
| ACTB1    | 3.64E-106 | 1.509246123 | 0.926 | 0.583 | 2.23E-101 | 1.59E+00    | macrophages    | ACTB     |
| PTMA1    | 7.39E-185 | 1.508545093 | 0.968 | 0.652 | 4.53E-180 | 1.48E+00    | endotheliocyte | PTMA     |

|           |           |             |       |       |           |             |                |           |
|-----------|-----------|-------------|-------|-------|-----------|-------------|----------------|-----------|
| MARCKSL12 | 0         | 1.5073979   | 0.654 | 0.196 | 0         | 3.336734694 | Sertoli_cells  | MARCKSL1  |
| MT-CO32   | 1.07E-182 | 1.505875222 | 0.907 | 0.462 | 6.58E-178 | 1.96E+00    | VSM_cells      | MT-CO3    |
| TIMP21    | 0         | 1.50552163  | 0.847 | 0.402 | 0         | 2.106965174 | PTM_cells      | TIMP2     |
| IFNG      | 0         | 1.504364458 | 0.368 | 0.001 | 0         | 368         | T_cells        | IFNG      |
| GSG1      | 0         | 1.503359612 | 0.909 | 0.591 | 0         | 1.538071066 | spermatid      | GSG1      |
| IGFBP5    | 0         | 1.502298436 | 0.455 | 0.055 | 0         | 8.272727273 | Leydig_cells   | IGFBP5    |
| CD2       | 1.02E-23  | 1.501039098 | 0.553 | 0.106 | 6.28E-19  | 5.22E+00    | T_cells        | CD2       |
| HSPB6     | 0         | 1.499121561 | 0.63  | 0.186 | 0         | 3.387096774 | Leydig_cells   | HSPB6     |
| LIFR      | 1.10E-269 | 1.497951787 | 0.739 | 0.163 | 6.73E-265 | 4.53E+00    | endotheliocyte | LIFR      |
| CD48      | 0         | 1.497801254 | 0.632 | 0.008 | 0         | 79          | T_cells        | CD48      |
| RPL416    | 8.15E-14  | 1.495896055 | 0.921 | 0.788 | 5.00E-09  | 1.17E+00    | T_cells        | RPL41     |
| CYR611    | 0         | 1.494852645 | 0.66  | 0.089 | 0         | 7.415730337 | PTM_cells      | CYR61     |
| CCL21     | 1.52E-57  | 1.493944747 | 0.236 | 0.044 | 9.32E-53  | 5.36E+00    | macrophages    | CCL2      |
| LMOD11    | 0         | 1.493219633 | 0.693 | 0.046 | 0         | 15.06521739 | VSM_cells      | LMOD1     |
| FAM71B    | 0         | 1.491643784 | 0.683 | 0.159 | 0         | 4.295597484 | spermatid      | FAM71B    |
| FMR1NB    | 0         | 1.491527206 | 0.533 | 0.089 | 0         | 5.988764045 | spermatogonia  | FMR1NB    |
| PEG10     | 0         | 1.490407065 | 0.529 | 0.101 | 0         | 5.237623762 | Sertoli_cells  | PEG10     |
| PDE4B     | 0         | 1.490090213 | 0.498 | 0.043 | 0         | 11.58139535 | macrophages    | PDE4B     |
| TNS11     | 0         | 1.489337695 | 0.732 | 0.074 | 0         | 9.891891892 | PTM_cells      | TNS1      |
| TBPL1     | 0         | 1.489331899 | 0.978 | 0.427 | 0         | 2.290398126 | spermatocyte   | TBPL1     |
| MT.CO32   | 2.32E-22  | 1.488920089 | 0.349 | 0.327 | 1.42E-17  | 1.07E+00    | Sertoli_cells  | MT.CO3    |
| FTL3      | 0         | 1.488618109 | 0.905 | 0.509 | 0         | 1.777996071 | PTM_cells      | FTL       |
| RPS3      | 1.70E-181 | 1.488256005 | 0.975 | 0.797 | 1.05E-176 | 1.22E+00    | endotheliocyte | RPS3      |
| IL2RG     | 0         | 1.48786343  | 0.474 | 0.003 | 0         | 158         | T_cells        | IL2RG     |
| PMAIP1    | 3.56E-241 | 1.485698813 | 0.418 | 0.038 | 2.18E-236 | 1.10E+01    | macrophages    | PMAIP1    |
| NGFRAP12  | 1.15E-280 | 1.485560125 | 0.399 | 0.122 | 7.03E-276 | 3.27E+00    | Sertoli_cells  | NGFRAP1   |
| CLEC14A   | 0         | 1.48514605  | 0.6   | 0.019 | 0         | 31.57894737 | endotheliocyte | CLEC14A   |
| CTSB      | 3.02E-91  | 1.481805526 | 0.606 | 0.215 | 1.85E-86  | 2.82E+00    | macrophages    | CTSB      |
| DUSP2     | 3.79E-274 | 1.480870762 | 0.492 | 0.047 | 2.32E-269 | 1.05E+01    | macrophages    | DUSP2     |
| GNLY      | 1.28E-214 | 1.480726354 | 0.184 | 0.001 | 7.83E-210 | 1.84E+02    | T_cells        | GNLY      |
| OTUD1     | 1.21E-105 | 1.477728232 | 0.539 | 0.147 | 7.40E-101 | 3.67E+00    | macrophages    | OTUD1     |
| HLA.A     | 4.32E-14  | 1.477683996 | 0.241 | 0.138 | 2.65E-09  | 1.75E+00    | endotheliocyte | HLA.A     |
| MMP21     | 0         | 1.477476529 | 0.747 | 0.154 | 0         | 4.850649351 | PTM_cells      | MMP2      |
| KCTD12    | 0         | 1.476527221 | 0.663 | 0.08  | 0         | 8.2875      | endotheliocyte | KCTD12    |
| BCAM      | 0         | 1.476318451 | 0.744 | 0.051 | 0         | 14.58823529 | endotheliocyte | BCAM      |
| FOSB3     | 0         | 1.472847267 | 0.782 | 0.321 | 0         | 2.436137072 | PTM_cells      | FOSB      |
| CD811     | 0         | 1.471679064 | 0.801 | 0.296 | 0         | 2.706081081 | Leydig_cells   | CD81      |
| C10orf101 | 0         | 1.471562742 | 0.452 | 0.037 | 0         | 12.21621622 | VSM_cells      | C10orf10  |
| RPL13A6   | 3.65E-18  | 1.468031727 | 1     | 0.737 | 2.24E-13  | 1.36E+00    | T_cells        | RPL13A    |
| PTMS2     | 0         | 1.466560039 | 0.795 | 0.185 | 0         | 4.297297297 | PTM_cells      | PTMS      |
| TPT11     | 1.71E-118 | 1.466023672 | 0.976 | 0.858 | 1.05E-113 | 1.14E+00    | macrophages    | TPT1      |
| RPS4X3    | 0         | 1.46348975  | 0.898 | 0.321 | 0         | 2.797507788 | PTM_cells      | RPS4X     |
| TKTL1     | 0         | 1.462224641 | 0.531 | 0.157 | 0         | 3.382165605 | spermatogonia  | TKTL1     |
| PLTP      | 0         | 1.461885923 | 0.669 | 0.147 | 0         | 4.551020408 | Leydig_cells   | PLTP      |
| CCSER2    | 0         | 1.461843158 | 0.844 | 0.49  | 0         | 1.72244898  | spermatid      | CCSER2    |
| TM4SF11   | 0         | 1.460147987 | 0.658 | 0.061 | 0         | 10.78688525 | Leydig_cells   | TM4SF1    |
| IER51     | 9.30E-132 | 1.456255253 | 0.566 | 0.131 | 5.71E-127 | 4.32E+00    | macrophages    | IER5      |
| MYL12A4   | 2.42E-13  | 1.456235792 | 0.711 | 0.328 | 1.49E-08  | 2.17E+00    | T_cells        | MYL12A    |
| RPL13A    | 2.53E-162 | 1.456023772 | 0.965 | 0.734 | 1.55E-157 | 1.31E+00    | endotheliocyte | RPL13A    |
| TIMP2     | 0         | 1.454563942 | 0.836 | 0.406 | 0         | 2.0591133   | Leydig_cells   | TIMP2     |
| IFITM22   | 0         | 1.454348133 | 0.751 | 0.14  | 0         | 5.364285714 | Leydig_cells   | IFITM2    |
| RBP7      | 0         | 1.452646007 | 0.66  | 0.074 | 0         | 8.918918919 | endotheliocyte | RBP7      |
| JUN       | 8.79E-203 | 1.452046428 | 0.935 | 0.362 | 5.39E-198 | 2.58E+00    | endotheliocyte | JUN       |
| HOPX      | 0         | 1.451890941 | 0.484 | 0.084 | 0         | 5.761904762 | Sertoli_cells  | HOPX      |
| FBLN51    | 0         | 1.451601023 | 0.708 | 0.065 | 0         | 10.89230769 | PTM_cells      | FBLN5     |
| RPL211    | 7.68E-181 | 1.451435767 | 0.955 | 0.47  | 4.71E-176 | 2.03E+00    | endotheliocyte | RPL21     |
| CPA3      | 0         | 1.451265788 | 0.24  | 0.001 | 0         | 240         | mastocyte      | CPA3      |
| SAT12     | 0         | 1.451107325 | 0.61  | 0.126 | 0         | 4.841269841 | Sertoli_cells  | SAT1      |
| RPS18     | 5.00E-170 | 1.4492582   | 0.98  | 0.851 | 3.06E-165 | 1.15E+00    | endotheliocyte | RPS18     |
| EPHX1     | 0         | 1.448227669 | 0.69  | 0.108 | 0         | 6.388888889 | Leydig_cells   | EPHX1     |
| ETS21     | 3.39E-271 | 1.448159374 | 0.552 | 0.062 | 2.08E-266 | 8.90E+00    | macrophages    | ETS2      |
| C20orf141 | 0         | 1.445978799 | 0.804 | 0.319 | 0         | 2.520376176 | spermatid      | C20orf141 |
| SLC2A3    | 0         | 1.445875386 | 0.677 | 0.084 | 0         | 8.05952381  | endotheliocyte | SLC2A3    |
| RPS82     | 0         | 1.445120856 | 0.969 | 0.768 | 0         | 1.26171875  | Leydig_cells   | RPS8      |
| TIMP33    | 0         | 1.444683249 | 0.841 | 0.165 | 0         | 5.096969697 | VSM_cells      | TIMP3     |
| SPTBN11   | 0         | 1.444462024 | 0.778 | 0.284 | 0         | 2.73943662  | Leydig_cells   | SPTBN1    |
| NASP      | 0         | 1.443823864 | 0.846 | 0.329 | 0         | 2.571428571 | spermatogonia  | NASP      |
| NFIB      | 0         | 1.44290787  | 0.71  | 0.066 | 0         | 10.75757576 | endotheliocyte | NFIB      |
| RNF151    | 0         | 1.442648281 | 0.822 | 0.446 | 0         | 1.843049327 | spermatid      | RNF151    |
| RPS28     | 1.13E-146 | 1.441003683 | 0.913 | 0.606 | 6.93E-142 | 1.51E+00    | endotheliocyte | RPS28     |
| SCARA5    | 0         | 1.440846036 | 0.526 | 0.01  | 0         | 52.6        | Leydig_cells   | SCARA5    |
| MGST32    | 2.11E-264 | 1.439959248 | 0.812 | 0.228 | 1.29E-259 | 3.56E+00    | VSM_cells      | MGST3     |
| MTND1P232 | 2.43E-12  | 1.439525281 | 0.349 | 0.376 | 1.49E-07  | 9.28E-01    | Sertoli_cells  | MTND1P23  |
| SPATA42   | 0         | 1.439346913 | 0.814 | 0.365 | 0         | 2.230136986 | spermatid      | SPATA42   |
| SMAP2     | 3.10E-92  | 1.43918841  | 0.593 | 0.21  | 1.90E-87  | 2.82E+00    | macrophages    | SMAP2     |



|           |           |             |       |       |           |             |                |           |
|-----------|-----------|-------------|-------|-------|-----------|-------------|----------------|-----------|
| TSHZ21    | 0         | 1.438153166 | 0.699 | 0.079 | 0         | 8.848101266 | PTM_cells      | TSHZ2     |
| RPS22     | 1.89E-161 | 1.437454203 | 0.963 | 0.673 | 1.16E-156 | 1.43E+00    | endotheliocyte | RPS2      |
| SPARC4    | 9.95E-260 | 1.436070644 | 0.524 | 0.23  | 6.10E-255 | 2.28E+00    | Sertoli_cells  | SPARC     |
| MFAP4     | 0         | 1.435472167 | 0.63  | 0.026 | 0         | 24.23076923 | PTM_cells      | MFAP4     |
| CD742     | 1.97E-20  | 1.434664193 | 0.474 | 0.079 | 1.21E-15  | 6.00E+00    | T_cells        | CD74      |
| SAMD4A    | 0         | 1.433617656 | 0.834 | 0.421 | 0         | 1.980997625 | spermatid      | SAMD4A    |
| LTB       | 1.74E-277 | 1.432012015 | 0.421 | 0.005 | 1.06E-272 | 8.42E+01    | T_cells        | LTB       |
| MT.ND51   | 5.47E-38  | 1.429534216 | 0.559 | 0.315 | 3.35E-33  | 1.77E+00    | macrophages    | MT.ND5    |
| TINAGL11  | 0         | 1.4295101   | 0.662 | 0.013 | 0         | 50.92307692 | VSM_cells      | TINAGL1   |
| ZFP36L11  | 8.41E-76  | 1.429311507 | 0.744 | 0.394 | 5.16E-71  | 1.89E+00    | macrophages    | ZFP36L1   |
| HERPUD1   | 6.16E-62  | 1.428363921 | 0.657 | 0.364 | 3.78E-57  | 1.80E+00    | macrophages    | HERPUD1   |
| GLUL      | 0         | 1.426578449 | 0.866 | 0.588 | 0         | 1.472789116 | spermatid      | GLUL      |
| RPL144    | 8.32E-147 | 1.425716837 | 0.865 | 0.642 | 5.11E-142 | 1.35E+00    | VSM_cells      | RPL14     |
| GADD45B2  | 0         | 1.424966152 | 0.757 | 0.168 | 0         | 4.505952381 | Leydig_cells   | GADD45B   |
| AKAP1     | 0         | 1.423981567 | 0.752 | 0.308 | 0         | 2.441558442 | spermatid      | AKAP1     |
| HLA.B     | 1.20E-16  | 1.422786518 | 0.236 | 0.124 | 7.38E-12  | 1.90E+00    | endotheliocyte | HLA.B     |
| CD633     | 0         | 1.422326647 | 0.847 | 0.264 | 0         | 3.208333333 | PTM_cells      | CD63      |
| BTG22     | 0         | 1.422159044 | 0.64  | 0.11  | 0         | 5.818181818 | Leydig_cells   | BTG2      |
| DES       | 1.96E-265 | 1.420700284 | 0.524 | 0.084 | 1.20E-260 | 6.24E+00    | VSM_cells      | DES       |
| ICAM11    | 3.79E-277 | 1.417728326 | 0.488 | 0.046 | 2.33E-272 | 1.06E+01    | macrophages    | ICAM1     |
| LGALS31   | 0         | 1.417108574 | 0.732 | 0.186 | 0         | 3.935483871 | Leydig_cells   | LGALS3    |
| LAMC31    | 0         | 1.417035348 | 0.684 | 0.043 | 0         | 15.90697674 | PTM_cells      | LAMC3     |
| APOD1     | 0         | 1.416653808 | 0.667 | 0.062 | 0         | 10.75806452 | PTM_cells      | APOD      |
| ID32      | 0         | 1.416443405 | 0.567 | 0.038 | 0         | 14.92105263 | VSM_cells      | ID3       |
| ALOX5AP   | 0         | 1.416322288 | 0.508 | 0.019 | 0         | 26.73684211 | macrophages    | ALOX5AP   |
| RPL13A2   | 0         | 1.416247622 | 0.964 | 0.728 | 0         | 1.324175824 | Leydig_cells   | RPL13A    |
| LINC00684 | 0         | 1.415452186 | 0.386 | 0.015 | 0         | 25.73333333 | Sertoli_cells  | LINC00684 |
| PPP1R15A2 | 0         | 1.414998163 | 0.714 | 0.175 | 0         | 4.08        | Leydig_cells   | PPP1R15A  |
| SPATA3    | 0         | 1.414294077 | 0.804 | 0.374 | 0         | 2.14973262  | spermatid      | SPATA3    |
| TXNIP2    | 0         | 1.412937748 | 0.752 | 0.149 | 0         | 5.046979866 | Leydig_cells   | TXNIP     |
| RPS266    | 4.34E-10  | 1.412569382 | 0.789 | 0.538 | 2.66E-05  | 1.47E+00    | T_cells        | RPS26     |
| PTPRB     | 0         | 1.412004722 | 0.64  | 0.021 | 0         | 30.47619048 | endotheliocyte | PTPRB     |
| MT.CO22   | 2.50E-20  | 1.410658165 | 0.349 | 0.335 | 1.53E-15  | 1.04E+00    | Sertoli_cells  | MT.CO2    |
| RPL10A    | 5.10E-158 | 1.410393523 | 0.931 | 0.659 | 3.13E-153 | 1.41E+00    | endotheliocyte | RPL10A    |
| VSIG4     | 0         | 1.409376174 | 0.512 | 0.023 | 0         | 22.26086957 | macrophages    | VSIG4     |
| ZFP36L22  | 0         | 1.409230687 | 0.713 | 0.123 | 0         | 5.796747967 | Leydig_cells   | ZFP36L2   |
| F13A1     | 2.09E-302 | 1.409151797 | 0.451 | 0.036 | 1.28E-297 | 1.25E+01    | macrophages    | F13A1     |
| CDKN1A1   | 1.34E-141 | 1.406740432 | 0.589 | 0.126 | 8.24E-137 | 4.67E+00    | macrophages    | CDKN1A    |
| MMP2      | 0         | 1.405332911 | 0.661 | 0.162 | 0         | 4.080246914 | Leydig_cells   | MMP2      |
| CLEC10A   | 0         | 1.404909148 | 0.471 | 0.003 | 0         | 157         | macrophages    | CLEC10A   |
| CABS1     | 0         | 1.404886202 | 0.813 | 0.34  | 0         | 2.391176471 | spermatid      | CABS1     |
| FOSB      | 2.35E-209 | 1.403216114 | 0.933 | 0.335 | 1.44E-204 | 2.79E+00    | endotheliocyte | FOSB      |
| GPX1      | 1.31E-82  | 1.402103083 | 0.721 | 0.355 | 8.01E-78  | 2.03E+00    | macrophages    | GPX1      |
| RPL18A7   | 1.56E-11  | 1.40165442  | 0.789 | 0.418 | 9.59E-07  | 1.89E+00    | T_cells        | RPL18A    |
| TMSB105   | 1.18E-19  | 1.400185494 | 0.921 | 0.398 | 7.22E-15  | 2.31E+00    | T_cells        | TMSB10    |
| MT.ND4    | 1.76E-71  | 1.399605175 | 0.392 | 0.37  | 1.08E-66  | 1.06E+00    | spermatogonia  | MT.ND4    |
| TSPAN16   | 0         | 1.398377727 | 0.816 | 0.362 | 0         | 2.254143646 | spermatid      | TSPAN16   |
| PRND      | 0         | 1.396905497 | 0.417 | 0.017 | 0         | 24.52941176 | Sertoli_cells  | PRND      |
| TNFSF10   | 0         | 1.39674005  | 0.682 | 0.018 | 0         | 37.88888889 | endotheliocyte | TNFSF10   |
| NUPR2     | 0         | 1.395640917 | 0.959 | 0.699 | 0         | 1.371959943 | spermatid      | NUPR2     |
| HLA.C     | 2.94E-36  | 1.39488016  | 0.231 | 0.076 | 1.80E-31  | 3.04E+00    | endotheliocyte | HLA.C     |
| RPL27A6   | 9.07E-15  | 1.394399084 | 0.921 | 0.787 | 5.56E-10  | 1.17E+00    | T_cells        | RPL27A    |
| PSAP      | 7.38E-86  | 1.394293098 | 0.828 | 0.444 | 4.53E-81  | 1.86E+00    | macrophages    | PSAP      |
| PDK41     | 1.53E-36  | 1.393845721 | 0.29  | 0.093 | 9.38E-32  | 3.12E+00    | macrophages    | PDK4      |
| HLA-DRA   | 0         | 1.392636751 | 0.618 | 0.021 | 0         | 29.42857143 | endotheliocyte | HLA-DRA   |
| HSPB1     | 3.82E-244 | 1.391730141 | 0.836 | 0.213 | 2.34E-239 | 3.92E+00    | endotheliocyte | HSPB1     |
| ANXA1     | 0         | 1.391355404 | 0.749 | 0.072 | 0         | 10.40277778 | endotheliocyte | ANXA1     |
| BTG2      | 0         | 1.39123906  | 0.759 | 0.123 | 0         | 6.170731707 | endotheliocyte | BTG2      |
| OLR1      | 7.97E-143 | 1.390540871 | 0.401 | 0.059 | 4.89E-138 | 6.80E+00    | macrophages    | OLR1      |
| TNF       | 0         | 1.38956989  | 0.32  | 0.004 | 0         | 80          | macrophages    | TNF       |
| CPE1      | 0         | 1.387968129 | 0.777 | 0.185 | 0         | 4.2         | PTM_cells      | CPE       |
| ACTB3     | 0         | 1.387559715 | 0.907 | 0.57  | 0         | 1.59122807  | PTM_cells      | ACTB      |
| LDHC      | 0         | 1.387035444 | 0.996 | 0.581 | 0         | 1.714285714 | spermatocyte   | LDHC      |
| MAGED21   | 0         | 1.383574062 | 0.74  | 0.11  | 0         | 6.727272727 | PTM_cells      | MAGED2    |
| EGR13     | 0         | 1.383257295 | 0.743 | 0.239 | 0         | 3.108786611 | PTM_cells      | EGR1      |
| BTG15     | 1.83E-10  | 1.382029935 | 0.789 | 0.611 | 1.12E-05  | 1.29E+00    | T_cells        | BTG1      |
| CYBB      | 0         | 1.38168933  | 0.448 | 0.002 | 0         | 224         | macrophages    | CYBB      |
| RPS4X4    | 1.63E-195 | 1.381236901 | 0.869 | 0.34  | 1.00E-190 | 2.56E+00    | VSM_cells      | RPS4X     |
| PTTG1     | 0         | 1.380888361 | 0.988 | 0.456 | 0         | 2.166666667 | spermatocyte   | PTTG1     |
| CTSG      | 1.27E-16  | 1.380507768 | 0.2   | 0.024 | 7.78E-12  | 8.33E+00    | mastocyte      | CTSG      |
| CPE       | 0         | 1.379853041 | 0.77  | 0.189 | 0         | 4.074074074 | Leydig_cells   | CPE       |
| NOTCH3    | 0         | 1.379725307 | 0.668 | 0.018 | 0         | 37.11111111 | VSM_cells      | NOTCH3    |
| CD3G      | 1.19E-294 | 1.379714706 | 0.526 | 0.007 | 7.30E-290 | 7.51E+01    | T_cells        | CD3G      |
| IQCF2     | 0         | 1.37965009  | 0.78  | 0.347 | 0         | 2.247838617 | spermatid      | IQCF2     |
| RPL145    | 6.57E-13  | 1.379033981 | 0.868 | 0.646 | 4.03E-08  | 1.34E+00    | T_cells        | RPL14     |



|           |           |             |       |       |             |             |                |          |
|-----------|-----------|-------------|-------|-------|-------------|-------------|----------------|----------|
| PPP1R15A6 | 1.91E-17  | 1.378753511 | 0.684 | 0.197 | 1.17E-12    | 3.47E+00    | T_cells        | PPP1R15A |
| CLIC15    | 9.94E-07  | 1.378316125 | 0.5   | 0.265 | 0.060958577 | 1.886792453 | T_cells        | CLIC1    |
| MARCKS1   | 1.60E-81  | 1.37776138  | 0.623 | 0.254 | 9.79E-77    | 2.45E+00    | macrophages    | MARCKS   |
| MT.CO3    | 2.23E-120 | 1.377640511 | 0.391 | 0.312 | 1.37E-115   | 1.25E+00    | spermatogonia  | MT.CO3   |
| RAMP3     | 0         | 1.377249177 | 0.61  | 0.028 | 0           | 21.78571429 | endotheliocyte | RAMP3    |
| RPL13A3   | 0         | 1.375600855 | 0.939 | 0.727 | 0           | 1.291609354 | PTM_cells      | RPL13A   |
| ARPC1B3   | 1.08E-30  | 1.373961659 | 0.553 | 0.078 | 6.64E-26    | 7.09E+00    | T_cells        | ARPC1B   |
| BTG24     | 1.23E-269 | 1.37294359  | 0.649 | 0.123 | 7.52E-265   | 5.28E+00    | VSM_cells      | BTG2     |
| IFI16     | 0         | 1.371787643 | 0.712 | 0.076 | 0           | 9.368421053 | endotheliocyte | IFI16    |
| KRT131    | 0         | 1.370775087 | 0.447 | 0.045 | 0           | 9.933333333 | PTM_cells      | KRT13    |
| ID23      | 1.53E-14  | 1.370770956 | 0.5   | 0.125 | 9.39E-10    | 4.00E+00    | T_cells        | ID2      |
| MTCO1P121 | 3.54E-72  | 1.370483263 | 0.345 | 0.212 | 2.17E-67    | 1.63E+00    | Sertoli_cells  | MTCO1P12 |
| ATF31     | 1.77E-142 | 1.369860206 | 0.569 | 0.114 | 1.09E-137   | 4.99E+00    | macrophages    | ATF3     |
| FCGR2B    | 0         | 1.369614344 | 0.444 | 0.008 | 0           | 55.5        | macrophages    | FCGR2B   |
| IER21     | 4.99E-106 | 1.368906945 | 0.63  | 0.175 | 3.06E-101   | 3.60E+00    | macrophages    | IER2     |
| CEBPD     | 4.32E-284 | 1.368877259 | 0.655 | 0.105 | 2.65E-279   | 6.24E+00    | endotheliocyte | CEBPD    |
| C7        | 0         | 1.368174787 | 0.295 | 0.011 | 0           | 26.81818182 | Leydig_cells   | C7       |
| RPL184    | 5.38E-152 | 1.36810521  | 0.888 | 0.568 | 3.30E-147   | 1.56E+00    | VSM_cells      | RPL18    |
| ICAM1     | 0         | 1.368083735 | 0.524 | 0.043 | 0           | 12.18604651 | endotheliocyte | ICAM1    |
| MEIOB     | 0         | 1.367214554 | 0.466 | 0.131 | 0           | 3.557251908 | spermatogonia  | MEIOB    |
| TMSB101   | 1.15E-137 | 1.366977128 | 0.933 | 0.392 | 7.03E-133   | 2.38E+00    | macrophages    | TMSB10   |
| ACTB4     | 1.66E-162 | 1.366845273 | 0.905 | 0.581 | 1.02E-157   | 1.56E+00    | VSM_cells      | ACTB     |
| MRC1      | 6.31E-150 | 1.365404231 | 0.458 | 0.075 | 3.87E-145   | 6.11E+00    | macrophages    | MRC1     |
| ENTPD2    | 0         | 1.364122544 | 0.518 | 0.022 | 0           | 23.54545455 | Leydig_cells   | ENTPD2   |
| CTGF2     | 3.62E-228 | 1.363185346 | 0.442 | 0.066 | 2.22E-223   | 6.70E+00    | VSM_cells      | CTGF     |
| MALAT11   | 2.20E-63  | 1.362323653 | 0.963 | 0.837 | 1.35E-58    | 1.15E+00    | macrophages    | MALAT1   |
| C2orf57   | 0         | 1.361834212 | 0.74  | 0.239 | 0           | 3.09623431  | spermatid      | C2orf57  |
| CALM13    | 0         | 1.359704812 | 0.829 | 0.684 | 0           | 1.211988304 | Sertoli_cells  | CALM1    |
| PTRF3     | 0         | 1.358473814 | 0.772 | 0.109 | 0           | 7.082568807 | VSM_cells      | PTRF     |
| BST23     | 0         | 1.357673225 | 0.73  | 0.083 | 0           | 8.795180723 | PTM_cells      | BST2     |
| PTMA4     | 1.92E-167 | 1.356637446 | 0.924 | 0.652 | 1.18E-162   | 1.42E+00    | VSM_cells      | PTMA     |
| ACTB5     | 2.36E-299 | 1.35488999  | 0.765 | 0.575 | 1.45E-294   | 1.33E+00    | Sertoli_cells  | ACTB     |
| STOM      | 2.03E-252 | 1.354424463 | 0.697 | 0.15  | 1.24E-247   | 4.65E+00    | endotheliocyte | STOM     |
| RPL26     | 4.33E-143 | 1.354420403 | 0.945 | 0.753 | 2.66E-138   | 1.25E+00    | endotheliocyte | RPL26    |
| EEF1A1    | 2.09E-183 | 1.35440274  | 0.99  | 0.924 | 1.28E-178   | 1.07E+00    | endotheliocyte | EEF1A1   |
| RPL283    | 1.38E-13  | 1.352707575 | 0.895 | 0.823 | 8.48E-09    | 1.09E+00    | T_cells        | RPL28    |
| ACKR1     | 0         | 1.351787645 | 0.395 | 0.005 | 0           | 79          | endotheliocyte | ACKR1    |
| MSN3      | 1.05E-30  | 1.351720793 | 0.526 | 0.071 | 6.41E-26    | 7.41E+00    | T_cells        | MSN      |
| TAGLN2    | 1.29E-240 | 1.351247717 | 0.799 | 0.204 | 7.93E-236   | 3.92E+00    | endotheliocyte | TAGLN2   |
| RPS23     | 3.23E-169 | 1.351120301 | 0.98  | 0.827 | 1.98E-164   | 1.19E+00    | endotheliocyte | RPS23    |
| BHLHE40   | 0         | 1.350741753 | 0.64  | 0.043 | 0           | 14.88372093 | endotheliocyte | BHLHE40  |
| XCL1      | 6.18E-68  | 1.349978567 | 0.184 | 0.004 | 3.79E-63    | 4.60E+01    | T_cells        | XCL1     |
| TP53TG5   | 0         | 1.349539182 | 0.644 | 0.174 | 0           | 3.701149425 | spermatid      | TP53TG5  |
| RPL41     | 2.18E-148 | 1.349520512 | 0.958 | 0.785 | 1.34E-143   | 1.22E+00    | endotheliocyte | RPL41    |
| PNRC12    | 0         | 1.349104446 | 0.778 | 0.382 | 0           | 2.036649215 | Leydig_cells   | PNRC1    |
| RPLP14    | 1.54E-143 | 1.348521921 | 0.924 | 0.764 | 9.45E-139   | 1.21E+00    | VSM_cells      | RPLP1    |
| PPP1R15A  | 9.34E-244 | 1.345625542 | 0.797 | 0.188 | 5.73E-239   | 4.24E+00    | endotheliocyte | PPP1R15A |
| GMFG1     | 6.57E-35  | 1.345516303 | 0.553 | 0.071 | 4.03E-30    | 7.79E+00    | T_cells        | GMFG     |
| PTMS1     | 0         | 1.344447913 | 0.74  | 0.192 | 0           | 3.854166667 | Leydig_cells   | PTMS     |
| SORBS2    | 0         | 1.342233682 | 0.617 | 0.028 | 0           | 22.03571429 | VSM_cells      | SORBS2   |
| LY6K      | 0         | 1.341604732 | 0.545 | 0.062 | 0           | 8.790322581 | spermatogonia  | LY6K     |
| FSTL1     | 0         | 1.340600374 | 0.604 | 0.061 | 0           | 9.901639344 | Leydig_cells   | FSTL1    |
| ITM2B1    | 1.25E-123 | 1.339999335 | 0.852 | 0.321 | 7.64E-119   | 2.65E+00    | macrophages    | ITM2B    |
| CD991     | 0         | 1.339447115 | 0.789 | 0.171 | 0           | 4.614035088 | Leydig_cells   | CD99     |
| IGFBP61   | 0         | 1.339127437 | 0.632 | 0.07  | 0           | 9.028571429 | PTM_cells      | IGFBP6   |
| CD92      | 0         | 1.338313563 | 0.698 | 0.084 | 0           | 8.30952381  | VSM_cells      | CD9      |
| GLIPR1    | 8.17E-133 | 1.337599202 | 0.539 | 0.12  | 5.01E-128   | 4.49E+00    | macrophages    | GLIPR1   |
| NR4A22    | 7.40E-11  | 1.337340606 | 0.474 | 0.151 | 4.54E-06    | 3.14E+00    | T_cells        | NR4A2    |
| FXD51     | 0         | 1.336513124 | 0.502 | 0.021 | 0           | 23.9047619  | macrophages    | FXD5     |
| WBSCR22   | 0         | 1.336204844 | 0.796 | 0.328 | 0           | 2.426829268 | spermatogonia  | WBSCR22  |
| EBF1      | 0         | 1.335977501 | 0.631 | 0.115 | 0           | 5.486956522 | Leydig_cells   | EBF1     |
| CCNA1     | 0         | 1.334787395 | 0.93  | 0.274 | 0           | 3.394160584 | spermatocyte   | CCNA1    |
| FYB1      | 4.47E-33  | 1.334323851 | 0.526 | 0.067 | 2.74E-28    | 7.85E+00    | T_cells        | FYB      |
| NEAT14    | 5.28E-239 | 1.332646518 | 0.755 | 0.187 | 3.24E-234   | 4.04E+00    | VSM_cells      | NEAT1    |
| ITGB11    | 0         | 1.331735709 | 0.788 | 0.187 | 0           | 4.213903743 | PTM_cells      | ITGB1    |
| CST31     | 0         | 1.331722646 | 0.938 | 0.409 | 0           | 2.293398533 | Leydig_cells   | CST3     |
| CD442     | 2.93E-15  | 1.331672981 | 0.447 | 0.099 | 1.80E-10    | 4.52E+00    | T_cells        | CD44     |
| OGFRL1    | 0         | 1.331495733 | 0.498 | 0.025 | 0           | 19.92       | macrophages    | OGFRL1   |
| CALD1     | 0         | 1.331094016 | 0.842 | 0.213 | 0           | 3.953051643 | Leydig_cells   | CALD1    |
| NUPR11    | 0         | 1.330807205 | 0.724 | 0.109 | 0           | 6.642201835 | PTM_cells      | NUPR1    |
| IRF1      | 1.55E-187 | 1.330295012 | 0.732 | 0.216 | 9.52E-183   | 3.39E+00    | endotheliocyte | IRF1     |
| BST2      | 0         | 1.33024352  | 0.749 | 0.105 | 0           | 7.133333333 | endotheliocyte | BST2     |
| RNASE11   | 3.80E-29  | 1.329476076 | 0.347 | 0.14  | 2.33E-24    | 2.48E+00    | macrophages    | RNASE1   |
| DBF4      | 0         | 1.328710594 | 0.987 | 0.433 | 0           | 2.279445727 | spermatocyte   | DBF4     |
| RPS196    | 3.89E-12  | 1.328646159 | 0.895 | 0.759 | 2.39E-07    | 1.18E+00    | T_cells        | RPS19    |

|           |           |             |       |       |             |             |                |           |
|-----------|-----------|-------------|-------|-------|-------------|-------------|----------------|-----------|
| RPL18A1   | 5.29E-152 | 1.326051032 | 0.888 | 0.411 | 3.24E-147   | 2.16E+00    | endotheliocyte | RPL18A    |
| CDH1      | 9.49E-229 | 1.325930629 | 0.34  | 0.026 | 5.82E-224   | 1.31E+01    | macrophages    | CDH1      |
| RPS220    | 4.54E-14  | 1.325915503 | 0.921 | 0.677 | 2.79E-09    | 1.36E+00    | T_cells        | RPS2      |
| ADIRF1    | 0         | 1.325742108 | 0.714 | 0.106 | 0           | 6.735849057 | Leydig_cells   | ADIRF     |
| PPP1R14A3 | 0         | 1.325597017 | 0.518 | 0.127 | 0           | 4.078740157 | Sertoli_cells  | PPP1R14A  |
| EGR14     | 2.40E-217 | 1.325550068 | 0.814 | 0.254 | 1.47E-212   | 3.20E+00    | VSM_cells      | EGR1      |
| DCXR      | 0         | 1.325108304 | 0.499 | 0.104 | 0           | 4.798076923 | Sertoli_cells  | DCXR      |
| VIM1      | 6.53E-101 | 1.324606416 | 0.879 | 0.448 | 4.01E-96    | 1.96E+00    | macrophages    | VIM       |
| MT-CO23   | 2.44E-173 | 1.324593726 | 0.903 | 0.428 | 1.49E-168   | 2.11E+00    | VSM_cells      | MT-CO2    |
| SOD3      | 1.83E-195 | 1.324129    | 0.767 | 0.289 | 1.12E-190   | 2.65E+00    | VSM_cells      | SOD3      |
| RPS36     | 5.75E-13  | 1.323831416 | 0.895 | 0.8   | 3.53E-08    | 1.12E+00    | T_cells        | RPS3      |
| SMCP      | 0         | 1.323666409 | 0.944 | 0.668 | 0           | 1.413173653 | spermatid      | SMCP      |
| RPL18     | 8.00E-144 | 1.321764054 | 0.916 | 0.569 | 4.91E-139   | 1.61E+00    | endotheliocyte | RPL18     |
| RPL10A4   | 2.95E-151 | 1.321086945 | 0.894 | 0.659 | 1.81E-146   | 1.36E+00    | VSM_cells      | RPL10A    |
| MTATP6P1  | 2.40E-276 | 1.321078481 | 0.379 | 0.196 | 1.47E-271   | 1.93E+00    | spermatogonia  | MTATP6P1  |
| TUBB4A    | 0         | 1.320673713 | 0.402 | 0.037 | 0           | 10.86486486 | Sertoli_cells  | TUBB4A    |
| EGFL7     | 0         | 1.320021136 | 0.784 | 0.1   | 0           | 7.84        | endotheliocyte | EGFL7     |
| CD531     | 0         | 1.319877497 | 0.5   | 0.005 | 0           | 100         | T_cells        | CD53      |
| RPL18A5   | 3.83E-157 | 1.319566143 | 0.85  | 0.41  | 2.35E-152   | 2.07E+00    | VSM_cells      | RPL18A    |
| GSTP12    | 0         | 1.319459543 | 0.735 | 0.149 | 0           | 4.932885906 | Leydig_cells   | GSTP1     |
| PPP3R2    | 0         | 1.318933981 | 0.975 | 0.452 | 0           | 2.157079646 | spermatocyte   | PPP3R2    |
| GTSF1L    | 0         | 1.31813037  | 0.879 | 0.516 | 0           | 1.703488372 | spermatid      | GTSF1L    |
| HLA-DRB1  | 5.24E-235 | 1.316840033 | 0.658 | 0.145 | 3.21E-230   | 4.54E+00    | endotheliocyte | HLA-DRB1  |
| FSCN3     | 0         | 1.316819004 | 0.674 | 0.171 | 0           | 3.941520468 | spermatid      | FSCN3     |
| GIMAP7    | 0         | 1.315428428 | 0.643 | 0.004 | 0           | 160.75      | endotheliocyte | GIMAP7    |
| PCP2      | 0         | 1.314857547 | 0.8   | 0.344 | 0           | 2.325581395 | spermatid      | PCP2      |
| HLA-B1    | 1.04E-14  | 1.312680896 | 0.374 | 0.252 | 6.35E-10    | 1.48E+00    | macrophages    | HLA-B     |
| RHOB1     | 2.17E-91  | 1.312235456 | 0.673 | 0.237 | 1.33E-86    | 2.84E+00    | macrophages    | RHOB      |
| ATF32     | 0         | 1.312104382 | 0.522 | 0.102 | 0           | 5.117647059 | Leydig_cells   | ATF3      |
| TIMP31    | 0         | 1.311838552 | 0.755 | 0.152 | 0           | 4.967105263 | Leydig_cells   | TIMP3     |
| TPM42     | 0         | 1.311770479 | 0.725 | 0.213 | 0           | 3.403755869 | PTM_cells      | TPM4      |
| S100A41   | 0         | 1.310276366 | 0.48  | 0.035 | 0           | 13.71428571 | Leydig_cells   | S100A4    |
| MT-ND52   | 0         | 1.310106634 | 0.735 | 0.275 | 0           | 2.672727273 | PTM_cells      | MT-ND5    |
| HCLS1     | 0         | 1.307447331 | 0.488 | 0.008 | 0           | 61          | macrophages    | HCLS1     |
| RPL11     | 3.24E-159 | 1.306266067 | 0.973 | 0.824 | 1.99E-154   | 1.18E+00    | endotheliocyte | RPL11     |
| EID11     | 0         | 1.305455822 | 0.843 | 0.345 | 0           | 2.443478261 | Leydig_cells   | EID1      |
| NCL       | 0         | 1.304811857 | 0.824 | 0.341 | 0           | 2.416422287 | spermatogonia  | NCL       |
| MYL6B     | 2.15E-296 | 1.304155256 | 0.742 | 0.594 | 1.32E-291   | 1.25E+00    | Sertoli_cells  | MYL6B     |
| RPL392    | 0         | 1.304145175 | 0.8   | 0.26  | 0           | 3.076923077 | Leydig_cells   | RPL39     |
| TSHZ2     | 0         | 1.303066271 | 0.66  | 0.086 | 0           | 7.674418605 | Leydig_cells   | TSHZ2     |
| C20orf144 | 0         | 1.302913274 | 0.72  | 0.416 | 0           | 1.730769231 | spermatid      | C20orf144 |
| CFH1      | 0         | 1.302363733 | 0.61  | 0.043 | 0           | 14.18604651 | Leydig_cells   | CFH       |
| IRGC      | 0         | 1.301348    | 0.828 | 0.423 | 0           | 1.957446809 | spermatid      | IRGC      |
| CAPZA3    | 0         | 1.301324338 | 0.863 | 0.519 | 0           | 1.662813102 | spermatid      | CAPZA3    |
| LIMS1     | 1.31E-150 | 1.300737009 | 0.7   | 0.255 | 8.05E-146   | 2.75E+00    | endotheliocyte | LIMS1     |
| IER23     | 0         | 1.300509018 | 0.664 | 0.155 | 0           | 4.283870968 | PTM_cells      | IER2      |
| NFKBIB    | 0         | 1.300216717 | 0.729 | 0.321 | 0           | 2.271028037 | spermatid      | NFKBIB    |
| RAD51AP2  | 0         | 1.299923917 | 0.272 | 0.09  | 0           | 3.022222222 | spermatogonia  | RAD51AP2  |
| PTN       | 5.32E-262 | 1.297309654 | 0.503 | 0.155 | 3.26E-257   | 3.25E+00    | Leydig_cells   | PTN       |
| DNAJB6    | 0         | 1.296510678 | 0.805 | 0.458 | 0           | 1.757641921 | spermatogonia  | DNAJB6    |
| EMP31     | 2.41E-106 | 1.295256119 | 0.572 | 0.16  | 1.48E-101   | 3.58E+00    | macrophages    | EMP3      |
| FXD52     | 1.81E-68  | 1.294808474 | 0.474 | 0.026 | 1.11E-63    | 1.82E+01    | T_cells        | FXD5      |
| SSPN      | 0         | 1.293939362 | 0.644 | 0.073 | 0           | 8.821917808 | Leydig_cells   | SSPN      |
| KLF41     | 5.09E-61  | 1.293740014 | 0.747 | 0.485 | 3.12E-56    | 1.54E+00    | macrophages    | KLF4      |
| CXCL16    | 0         | 1.293242388 | 0.808 | 0.417 | 0           | 1.93764988  | spermatid      | CXCL16    |
| CLPB      | 0         | 1.29262138  | 0.84  | 0.464 | 0           | 1.810344828 | spermatid      | CLPB      |
| ELK3      | 0         | 1.292120274 | 0.645 | 0.043 | 0           | 15          | endotheliocyte | ELK3      |
| FAM209A   | 0         | 1.291265643 | 0.751 | 0.423 | 0           | 1.775413712 | spermatid      | FAM209A   |
| LGALS13   | 0         | 1.291021299 | 0.63  | 0.18  | 0           | 3.5         | Sertoli_cells  | LGALS1    |
| LST1      | 0         | 1.290623757 | 0.441 | 0.009 | 0           | 49          | macrophages    | LST1      |
| NBL1      | 0         | 1.289352515 | 0.591 | 0.078 | 0           | 7.576923077 | Leydig_cells   | NBL1      |
| GAPDHS    | 0         | 1.288620756 | 0.879 | 0.495 | 0           | 1.775757576 | spermatid      | GAPDHS    |
| ZFP36L13  | 0         | 1.288427536 | 0.805 | 0.377 | 0           | 2.135278515 | PTM_cells      | ZFP36L1   |
| NEAT12    | 0         | 1.288207192 | 0.617 | 0.179 | 0           | 3.446927374 | Leydig_cells   | NEAT1     |
| CHGA      | 0         | 1.287143666 | 0.397 | 0.056 | 0           | 7.089285714 | Sertoli_cells  | CHGA      |
| CYLC2     | 0         | 1.286780758 | 0.875 | 0.485 | 0           | 1.804123711 | spermatid      | CYLC2     |
| STK4      | 2.64E-13  | 1.286063809 | 0.579 | 0.201 | 1.62E-08    | 2.88E+00    | T_cells        | STK4      |
| EHD4      | 0         | 1.285877428 | 0.65  | 0.055 | 0           | 11.81818182 | endotheliocyte | EHD4      |
| RPS4X2    | 0         | 1.285791953 | 0.896 | 0.325 | 0           | 2.756923077 | Leydig_cells   | RPS4X     |
| TPPP2     | 0         | 1.285266441 | 0.872 | 0.519 | 0           | 1.680154143 | spermatid      | TPPP2     |
| RPS285    | 1.75E-09  | 1.285046059 | 0.789 | 0.61  | 0.000107272 | 1.293442623 | T_cells        | RPS28     |
| RPS83     | 0         | 1.285029456 | 0.928 | 0.768 | 0           | 1.208333333 | PTM_cells      | RPS8      |
| RPL101    | 5.21E-120 | 1.28489913  | 0.909 | 0.36  | 3.20E-115   | 2.53E+00    | macrophages    | RPL10     |
| IFI271    | 0         | 1.284828615 | 0.605 | 0.114 | 0           | 5.307017544 | Leydig_cells   | IFI27     |
| BST22     | 0         | 1.28426785  | 0.695 | 0.089 | 0           | 7.808988764 | Leydig_cells   | BST2      |

|               |           |             |       |       |             |             |                |              |
|---------------|-----------|-------------|-------|-------|-------------|-------------|----------------|--------------|
| LGALS1        | 0         | 1.283581267 | 0.74  | 0.185 | 0           | 4           | Leydig_cells   | LGALS1       |
| MT.ATP6       | 3.33E-89  | 1.283571261 | 0.388 | 0.336 | 2.04E-84    | 1.15E+00    | spermatogonia  | MT.ATP6      |
| MT-CYB6       | 6.75E-12  | 1.281276348 | 0.816 | 0.398 | 4.14E-07    | 2.05E+00    | T_cells        | MT-CYB       |
| CCDC91        | 0         | 1.280548747 | 0.902 | 0.606 | 0           | 1.488448845 | spermatid      | CCDC91       |
| FCGR3A        | 0         | 1.279150227 | 0.377 | 0.001 | 0           | 377         | macrophages    | FCGR3A       |
| RASD1         | 0         | 1.279059136 | 0.591 | 0.045 | 0           | 13.13333333 | PTM_cells      | RASD1        |
| SYNE2         | 2.96E-277 | 1.278477637 | 0.697 | 0.126 | 1.82E-272   | 5.53E+00    | endotheliocyte | SYNE2        |
| RPL10P31      | 1.05E-148 | 1.278221674 | 0.391 | 0.052 | 6.41E-144   | 7.52E+00    | macrophages    | RPL10P3      |
| COL18A12      | 0         | 1.277780872 | 0.609 | 0.075 | 0           | 8.12        | VSM_cells      | COL18A1      |
| PSMG1         | 0         | 1.277115783 | 0.983 | 0.471 | 0           | 2.087048832 | spermatocyte   | PSMG1        |
| MT.CO2        | 3.30E-105 | 1.276924687 | 0.388 | 0.321 | 2.03E-100   | 1.21E+00    | spermatogonia  | MT.CO2       |
| SMIM1         | 0         | 1.275539573 | 0.426 | 0.069 | 0           | 6.173913043 | Sertoli_cells  | SMIM1        |
| S100A65       | 4.17E-31  | 1.275479922 | 0.763 | 0.133 | 2.56E-26    | 5.74E+00    | T_cells        | S100A6       |
| HMGB2         | 0         | 1.27495277  | 0.776 | 0.327 | 0           | 2.373088685 | spermatogonia  | HMGB2        |
| ETS2          | 0         | 1.274938294 | 0.65  | 0.058 | 0           | 11.20689655 | endotheliocyte | ETS2         |
| DUSP6         | 3.75E-276 | 1.27464422  | 0.546 | 0.077 | 2.30E-271   | 7.09E+00    | endotheliocyte | DUSP6        |
| CETN1         | 0         | 1.274471716 | 0.991 | 0.574 | 0           | 1.726480836 | spermatocyte   | CETN1        |
| RPL10A3       | 0         | 1.274242792 | 0.902 | 0.651 | 0           | 1.385560676 | PTM_cells      | RPL10A       |
| F3            | 0         | 1.273254602 | 0.637 | 0.052 | 0           | 12.25       | PTM_cells      | F3           |
| PMP22         | 0         | 1.272207885 | 0.653 | 0.139 | 0           | 4.697841727 | Leydig_cells   | PMP22        |
| RPS146        | 7.30E-13  | 1.272070694 | 0.921 | 0.831 | 4.48E-08    | 1.11E+00    | T_cells        | RPS14        |
| RPS4X6        | 8.88E-16  | 1.27201358  | 0.868 | 0.349 | 5.45E-11    | 2.49E+00    | T_cells        | RPS4X        |
| HCST          | 0         | 1.271441825 | 0.451 | 0.014 | 0           | 32.21428571 | macrophages    | HCST         |
| PTCH2         | 0         | 1.271239363 | 0.507 | 0.067 | 0           | 7.567164179 | Leydig_cells   | PTCH2        |
| VCAN1         | 0         | 1.268032218 | 0.595 | 0.046 | 0           | 12.93478261 | PTM_cells      | VCAN         |
| RPSA          | 0         | 1.266399682 | 0.804 | 0.571 | 0           | 1.408056042 | spermatogonia  | RPSA         |
| RPS9          | 8.13E-170 | 1.266232601 | 0.975 | 0.836 | 4.99E-165   | 1.17E+00    | endotheliocyte | RPS9         |
| C17orf105     | 0         | 1.266197216 | 0.777 | 0.381 | 0           | 2.039370079 | spermatid      | C17orf105    |
| ACTL7A        | 0         | 1.265786792 | 0.854 | 0.461 | 0           | 1.852494577 | spermatid      | ACTL7A       |
| ALOX5AP1      | 6.51E-51  | 1.26351435  | 0.395 | 0.024 | 3.99E-46    | 1.65E+01    | T_cells        | ALOX5AP      |
| SOX9          | 0         | 1.263175205 | 0.446 | 0.09  | 0           | 4.955555556 | Sertoli_cells  | SOX9         |
| CTSW          | 4.34E-202 | 1.262777086 | 0.395 | 0.006 | 2.66E-197   | 6.58E+01    | T_cells        | CTSW         |
| HERC5         | 0         | 1.262448432 | 0.582 | 0.278 | 0           | 2.09352518  | spermatogonia  | HERC5        |
| SFRP41        | 0         | 1.261199306 | 0.58  | 0.027 | 0           | 21.48148148 | PTM_cells      | SFRP4        |
| CSRNP11       | 7.34E-93  | 1.261188603 | 0.576 | 0.179 | 4.50E-88    | 3.22E+00    | macrophages    | CSRNP1       |
| RPL395        | 0         | 1.260021219 | 0.694 | 0.254 | 0           | 2.732283465 | Sertoli_cells  | RPL39        |
| CEBPD2        | 0         | 1.25924178  | 0.556 | 0.094 | 0           | 5.914893617 | Leydig_cells   | CEBPD        |
| LCP12         | 6.35E-11  | 1.258957818 | 0.632 | 0.289 | 3.89E-06    | 2.19E+00    | T_cells        | LCP1         |
| RNASSET2      | 1.43E-107 | 1.2589285   | 0.519 | 0.132 | 8.80E-103   | 3.93E+00    | macrophages    | RNASSET2     |
| DCUN1D1       | 0         | 1.25862545  | 0.903 | 0.687 | 0           | 1.31441048  | spermatid      | DCUN1D1      |
| NEXN1         | 0         | 1.258423458 | 0.632 | 0.105 | 0           | 6.019047619 | VSM_cells      | NEXN         |
| RP5.1052M9.11 | 4.27E-45  | 1.257838867 | 0.478 | 0.205 | 2.62E-40    | 2.33E+00    | macrophages    | RP5.1052M9.1 |
| SUSD3         | 0         | 1.257274357 | 0.407 | 0.021 | 0           | 19.38095238 | Sertoli_cells  | SUSD3        |
| PSAP1         | 0         | 1.256614059 | 0.863 | 0.43  | 0           | 2.006976744 | Leydig_cells   | PSAP         |
| IDS3          | 1.10E-24  | 1.255607394 | 0.474 | 0.071 | 6.77E-20    | 6.68E+00    | T_cells        | IDS          |
| REL1          | 5.34E-124 | 1.255264715 | 0.508 | 0.11  | 3.27E-119   | 4.62E+00    | macrophages    | REL          |
| IQCF1         | 0         | 1.25443413  | 0.795 | 0.396 | 0           | 2.007575758 | spermatid      | IQCF1        |
| ITGB21        | 7.06E-167 | 1.252912699 | 0.447 | 0.009 | 4.33E-162   | 4.97E+01    | T_cells        | ITGB2        |
| MT-ATP66      | 2.93E-10  | 1.252203414 | 0.789 | 0.435 | 1.79E-05    | 1.81E+00    | T_cells        | MT-ATP6      |
| RPS272        | 8.67E-09  | 1.250778346 | 0.921 | 0.823 | 0.000532164 | 1.119076549 | T_cells        | RPS27        |
| DNAJB8        | 0         | 1.250733728 | 0.787 | 0.339 | 0           | 2.321533923 | spermatid      | DNAJB8       |
| OGN           | 0         | 1.250605492 | 0.598 | 0.056 | 0           | 10.67857143 | Leydig_cells   | OGN          |
| CCNI          | 0         | 1.250427457 | 0.797 | 0.479 | 0           | 1.66388309  | spermatogonia  | CCNI         |
| UBQLN3        | 0         | 1.250221642 | 0.793 | 0.385 | 0           | 2.05974026  | spermatid      | UBQLN3       |
| ALDH1A3       | 0         | 1.248845245 | 0.515 | 0.033 | 0           | 15.60606061 | Leydig_cells   | ALDH1A3      |
| B3GNT5        | 3.40E-72  | 1.248591621 | 0.418 | 0.118 | 2.08E-67    | 3.54E+00    | macrophages    | B3GNT5       |
| TNS12         | 0         | 1.246947843 | 0.751 | 0.095 | 0           | 7.905263158 | VSM_cells      | TNS1         |
| LTBP41        | 0         | 1.246337763 | 0.778 | 0.129 | 0           | 6.031007752 | PTM_cells      | LTBP4        |
| RPS15A3       | 6.67E-14  | 1.246155998 | 0.947 | 0.786 | 4.09E-09    | 1.20E+00    | T_cells        | RPS15A       |
| CCDC85B       | 9.56E-308 | 1.24600168  | 0.705 | 0.117 | 5.87E-303   | 6.03E+00    | endotheliocyte | CCDC85B      |
| PRSS37        | 0         | 1.245352344 | 0.603 | 0.123 | 0           | 4.902439024 | spermatid      | PRSS37       |
| C2CD4B        | 0         | 1.244780845 | 0.409 | 0.004 | 0           | 102.25      | endotheliocyte | C2CD4B       |
| CD1512        | 0         | 1.24420552  | 0.66  | 0.094 | 0           | 7.021276596 | VSM_cells      | CD151        |
| TNFAIP3       | 5.83E-194 | 1.243957576 | 0.556 | 0.11  | 3.58E-189   | 5.05E+00    | endotheliocyte | TNFAIP3      |
| PECAM1        | 0         | 1.24388895  | 0.486 | 0.008 | 0           | 60.75       | endotheliocyte | PECAM1       |
| ABLIM11       | 0         | 1.243445053 | 0.716 | 0.265 | 0           | 2.701886792 | PTM_cells      | ABLIM1       |
| MT.TM         | 1.47E-266 | 1.243438174 | 0.282 | 0.062 | 9.00E-262   | 4.55E+00    | Sertoli_cells  | MT.TM        |
| ZNF683        | 0         | 1.24297888  | 0.684 | 0.183 | 0           | 3.737704918 | spermatid      | ZNF683       |
| RPL23A4       | 4.15E-13  | 1.242524977 | 0.921 | 0.737 | 2.55E-08    | 1.25E+00    | T_cells        | RPL23A       |
| ARHGDI1B      | 2.12E-292 | 1.241598905 | 0.441 | 0.035 | 1.30E-287   | 1.26E+01    | macrophages    | ARHGDI1B     |
| PPP1R14A2     | 4.18E-289 | 1.241178755 | 0.717 | 0.142 | 2.57E-284   | 5.05E+00    | VSM_cells      | PPP1R14A     |
| SPERT         | 0         | 1.240150959 | 0.758 | 0.306 | 0           | 2.477124183 | spermatid      | SPERT        |
| ZMYND10       | 0         | 1.24013452  | 0.965 | 0.387 | 0           | 2.493540052 | spermatocyte   | ZMYND10      |
| DUSP16        | 1.97E-13  | 1.240001975 | 0.605 | 0.186 | 1.21E-08    | 3.25E+00    | T_cells        | DUSP1        |
| RPL3          | 1.27E-156 | 1.239728985 | 0.99  | 0.923 | 7.79E-152   | 1.07E+00    | endotheliocyte | RPL3         |

|           |           |             |       |       |             |             |                |           |
|-----------|-----------|-------------|-------|-------|-------------|-------------|----------------|-----------|
| GIMAP8    | 0         | 1.239721    | 0.563 | 0.003 | 0           | 187.6666667 | endotheliocyte | GIMAP8    |
| ABCA8     | 0         | 1.239065723 | 0.603 | 0.134 | 0           | 4.5         | Leydig_cells   | ABCA8     |
| HOOK1     | 0         | 1.238979543 | 0.778 | 0.44  | 0           | 1.768181818 | spermatid      | HOOK1     |
| IER22     | 0         | 1.238948174 | 0.686 | 0.157 | 0           | 4.369426752 | Leydig_cells   | IER2      |
| EEF1A13   | 0         | 1.237807136 | 0.978 | 0.922 | 0           | 1.060737527 | PTM_cells      | EEF1A1    |
| HEG1      | 0         | 1.237017124 | 0.591 | 0.051 | 0           | 11.58823529 | endotheliocyte | HEG1      |
| COL1A11   | 0         | 1.236660109 | 0.701 | 0.102 | 0           | 6.87254902  | PTM_cells      | COL1A1    |
| CYTIP1    | 4.19E-150 | 1.236364779 | 0.526 | 0.014 | 2.57E-145   | 3.76E+01    | T_cells        | CYTIP     |
| PALMD     | 2.16E-237 | 1.236144873 | 0.635 | 0.126 | 1.32E-232   | 5.04E+00    | endotheliocyte | PALMD     |
| MSR1      | 0         | 1.235968556 | 0.431 | 0.019 | 0           | 22.68421053 | macrophages    | MSR1      |
| FCGRT2    | 0         | 1.235643671 | 0.671 | 0.174 | 0           | 3.856321839 | Leydig_cells   | FCGRT     |
| MYL12A    | 7.01E-147 | 1.234017934 | 0.774 | 0.322 | 4.30E-142   | 2.40E+00    | endotheliocyte | MYL12A    |
| GSTP14    | 6.70E-286 | 1.23242629  | 0.763 | 0.164 | 4.11E-281   | 4.65E+00    | VSM_cells      | GSTP1     |
| RPL215    | 5.49E-163 | 1.232247051 | 0.903 | 0.47  | 3.37E-158   | 1.92E+00    | VSM_cells      | RPL21     |
| BCAM1     | 0         | 1.232133082 | 0.649 | 0.051 | 0           | 12.7254902  | VSM_cells      | BCAM      |
| NFKBIZ    | 0         | 1.231870532 | 0.672 | 0.1   | 0           | 6.72        | endotheliocyte | NFKBIZ    |
| IL13RA1   | 1.01E-133 | 1.230880475 | 0.519 | 0.106 | 6.20E-129   | 4.90E+00    | macrophages    | IL13RA1   |
| FAM129A1  | 0         | 1.230336991 | 0.63  | 0.018 | 0           | 35          | VSM_cells      | FAM129A   |
| RPL23     | 5.65E-146 | 1.230244154 | 0.938 | 0.7   | 3.47E-141   | 1.34E+00    | endotheliocyte | RPL23     |
| PRKCDBP   | 0         | 1.229797256 | 0.91  | 0.351 | 0           | 2.592592593 | spermatocyte   | PRKCDBP   |
| IFITM25   | 1.99E-14  | 1.228905612 | 0.579 | 0.165 | 1.22E-09    | 3.51E+00    | T_cells        | IFITM2    |
| PODXL     | 0         | 1.22848414  | 0.593 | 0.007 | 0           | 84.71428571 | endotheliocyte | PODXL     |
| HLA.DMA   | 0         | 1.228475842 | 0.32  | 0.005 | 0           | 64          | macrophages    | HLA.DMA   |
| HNRNPA2B1 | 0         | 1.227085764 | 0.905 | 0.628 | 0           | 1.441082803 | spermatogonia  | HNRNPA2B1 |
| RPS27A    | 2.97E-158 | 1.226920436 | 0.975 | 0.859 | 1.82E-153   | 1.14E+00    | endotheliocyte | RPS27A    |
| LYAR      | 0         | 1.226779928 | 0.928 | 0.363 | 0           | 2.556473829 | spermatocyte   | LYAR      |
| NUPR13    | 0         | 1.226627096 | 0.479 | 0.116 | 0           | 4.129310345 | Sertoli_cells  | NUPR1     |
| PTMS      | 6.62E-248 | 1.226505649 | 0.839 | 0.205 | 4.06E-243   | 4.09E+00    | endotheliocyte | PTMS      |
| FLNA1     | 0         | 1.225571219 | 0.733 | 0.088 | 0           | 8.329545455 | PTM_cells      | FLNA      |
| HBB       | 2.33E-08  | 1.224967452 | 0.043 | 0.03  | 0.001427552 | 1.433333333 | spermatid      | HBB       |
| RCAN2     | 1.69E-270 | 1.224882466 | 0.664 | 0.147 | 1.04E-265   | 4.52E+00    | VSM_cells      | RCAN2     |
| FAM71C    | 0         | 1.224579404 | 0.609 | 0.106 | 0           | 5.745283019 | spermatid      | FAM71C    |
| GADD45B1  | 2.09E-146 | 1.224017416 | 0.744 | 0.187 | 1.28E-141   | 3.98E+00    | macrophages    | GADD45B   |
| HSPA1B1   | 8.07E-40  | 1.223239002 | 0.451 | 0.193 | 4.95E-35    | 2.34E+00    | macrophages    | HSPA1B    |
| EEF1A14   | 2.62E-158 | 1.222939536 | 0.966 | 0.924 | 1.61E-153   | 1.05E+00    | VSM_cells      | EEF1A1    |
| TUBA1A2   | 0         | 1.22293584  | 0.688 | 0.183 | 0           | 3.759562842 | Leydig_cells   | TUBA1A    |
| IQCF3     | 0         | 1.222496065 | 0.8   | 0.371 | 0           | 2.156334232 | spermatid      | IQCF3     |
| CRISP2    | 0         | 1.221798355 | 0.965 | 0.81  | 0           | 1.191358025 | spermatid      | CRISP2    |
| HSPG2     | 0         | 1.221664378 | 0.593 | 0.052 | 0           | 11.40384615 | endotheliocyte | HSPG2     |
| NAE1      | 0         | 1.221647953 | 0.67  | 0.082 | 0           | 8.170731707 | spermatogonia  | NAE1      |
| MT.CYB1   | 3.90E-35  | 1.221395734 | 0.572 | 0.332 | 2.39E-30    | 1.72E+00    | macrophages    | MT.CYB    |
| MT-CYB3   | 1.43E-296 | 1.221267892 | 0.786 | 0.378 | 8.77E-292   | 2.08E+00    | PTM_cells      | MT-CYB    |
| CCNB2     | 0         | 1.221245278 | 0.949 | 0.296 | 0           | 3.206081081 | spermatocyte   | CCNB2     |
| LINC00608 | 0         | 1.220887859 | 0.744 | 0.269 | 0           | 2.765799257 | spermatid      | LINC00608 |
| ITM2A     | 0         | 1.220261336 | 0.675 | 0.069 | 0           | 9.782608696 | endotheliocyte | ITM2A     |
| SPINK2    | 0         | 1.219989303 | 0.993 | 0.697 | 0           | 1.424677188 | spermatocyte   | SPINK2    |
| HES4      | 0         | 1.219937221 | 0.605 | 0.032 | 0           | 18.90625    | VSM_cells      | HES4      |
| JUND      | 1.61E-113 | 1.219003841 | 0.841 | 0.499 | 9.87E-109   | 1.69E+00    | endotheliocyte | JUND      |
| LMO2      | 0         | 1.218805381 | 0.563 | 0.021 | 0           | 26.80952381 | endotheliocyte | LMO2      |
| GADD45B3  | 0         | 1.21634598  | 0.716 | 0.166 | 0           | 4.313253012 | PTM_cells      | GADD45B   |
| CCND11    | 0         | 1.215994871 | 0.529 | 0.043 | 0           | 12.30232558 | VSM_cells      | CCND1     |
| MT-CO3    | 3.58E-167 | 1.215871175 | 0.533 | 0.452 | 2.20E-162   | 1.18E+00    | spermatogonia  | MT-CO3    |
| MT-ATP63  | 4.01E-266 | 1.215399622 | 0.789 | 0.417 | 2.46E-261   | 1.89E+00    | PTM_cells      | MT-ATP6   |
| TSKS      | 0         | 1.214546708 | 0.787 | 0.392 | 0           | 2.007653061 | spermatid      | TSKS      |
| LINC00238 | 0         | 1.214375803 | 0.373 | 0.088 | 0           | 4.238636364 | spermatid      | LINC00238 |
| FOLR2     | 0         | 1.2137189   | 0.35  | 0.004 | 0           | 87.5        | macrophages    | FOLR2     |
| ANKRD7    | 0         | 1.212887063 | 0.998 | 0.755 | 0           | 1.321854305 | spermatocyte   | ANKRD7    |
| OXCT2     | 0         | 1.212432967 | 0.68  | 0.144 | 0           | 4.722222222 | spermatid      | OXCT2     |
| RDX1      | 7.26E-171 | 1.21233291  | 0.794 | 0.268 | 4.45E-166   | 2.96E+00    | endotheliocyte | RDX       |
| TXNIP1    | 1.04E-77  | 1.212123425 | 0.549 | 0.171 | 6.37E-73    | 3.21E+00    | macrophages    | TXNIP     |
| RPL123    | 0         | 1.211985459 | 0.881 | 0.623 | 0           | 1.414125201 | PTM_cells      | RPL12     |
| LRWD1     | 0         | 1.210822523 | 0.992 | 0.541 | 0           | 1.833641405 | spermatocyte   | LRWD1     |
| C16orf82  | 0         | 1.210500513 | 0.789 | 0.391 | 0           | 2.017902813 | spermatid      | C16orf82  |
| DPEP3     | 0         | 1.21030811  | 0.583 | 0.132 | 0           | 4.416666667 | spermatogonia  | DPEP3     |
| CCDC42    | 0         | 1.209718757 | 0.904 | 0.251 | 0           | 3.601593625 | spermatocyte   | CCDC42    |
| PPP1R12B  | 6.40E-226 | 1.208954869 | 0.655 | 0.168 | 3.93E-221   | 3.90E+00    | VSM_cells      | PPP1R12B  |
| RPL36A    | 1.74E-203 | 1.208688033 | 0.64  | 0.133 | 1.07E-198   | 4.81E+00    | endotheliocyte | RPL36A    |
| RPL231    | 3.94E-87  | 1.208457675 | 0.902 | 0.701 | 2.42E-82    | 1.29E+00    | macrophages    | RPL23     |
| SPATA16   | 0         | 1.208255861 | 0.958 | 0.263 | 0           | 3.642585551 | spermatocyte   | SPATA16   |
| RPL391    | 1.92E-93  | 1.207891526 | 0.747 | 0.277 | 1.18E-88    | 2.70E+00    | macrophages    | RPL39     |
| RBP1      | 0         | 1.207582108 | 0.388 | 0.036 | 0           | 10.77777778 | Sertoli_cells  | RBP1      |
| RPS4Y1    | 4.15E-186 | 1.205525221 | 0.826 | 0.266 | 2.55E-181   | 3.11E+00    | endotheliocyte | RPS4Y1    |
| KLF62     | 1.21E-261 | 1.205402406 | 0.655 | 0.276 | 7.43E-257   | 2.37E+00    | Leydig_cells   | KLF6      |
| RPL6      | 6.89E-130 | 1.205347275 | 0.908 | 0.681 | 4.23E-125   | 1.33E+00    | endotheliocyte | RPL6      |
| IFITM33   | 0         | 1.205168587 | 0.811 | 0.166 | 0           | 4.885542169 | PTM_cells      | IFITM3    |

|            |           |             |       |       |             |             |                |            |
|------------|-----------|-------------|-------|-------|-------------|-------------|----------------|------------|
| RPL186     | 9.57E-12  | 1.204897137 | 0.868 | 0.573 | 5.87E-07    | 1.51E+00    | T_cells        | RPL18      |
| KRT13      | 1.24E-295 | 1.204452982 | 0.323 | 0.054 | 7.62E-291   | 5.98E+00    | Leydig_cells   | KRT13      |
| PBK        | 0         | 1.204109848 | 0.975 | 0.385 | 0           | 2.532467532 | spermatocyte   | PBK        |
| MCHR2-AS1  | 0         | 1.20408534  | 0.565 | 0.199 | 0           | 2.83919598  | spermatocyte   | MCHR2-AS1  |
| RPS14      | 3.92E-143 | 1.203863428 | 0.96  | 0.829 | 2.40E-138   | 1.16E+00    | endotheliocyte | RPS14      |
| AC013461.1 | 2.16E-216 | 1.203757591 | 0.66  | 0.172 | 1.32E-211   | 3.84E+00    | VSM_cells      | AC013461.1 |
| RPLP1      | 2.68E-144 | 1.203377743 | 0.985 | 0.763 | 1.64E-139   | 1.29E+00    | endotheliocyte | RPLP1      |
| RPS186     | 1.84E-12  | 1.202952299 | 0.921 | 0.853 | 1.13E-07    | 1.08E+00    | T_cells        | RPS18      |
| RPL14      | 1.55E-127 | 1.200774612 | 0.901 | 0.642 | 9.52E-123   | 1.40E+00    | endotheliocyte | RPL14      |
| JUND1      | 2.09E-83  | 1.200498675 | 0.838 | 0.501 | 1.28E-78    | 1.67E+00    | macrophages    | JUND       |
| GSTP13     | 0         | 1.200474621 | 0.738 | 0.145 | 0           | 5.089655172 | PTM_cells      | GSTP1      |
| TAGLN23    | 0         | 1.200322266 | 0.521 | 0.192 | 0           | 2.713541667 | Sertoli_cells  | TAGLN2     |
| THBD       | 0         | 1.200266433 | 0.561 | 0.042 | 0           | 13.35714286 | endotheliocyte | THBD       |
| TGFBI      | 0         | 1.200070857 | 0.397 | 0.011 | 0           | 36.09090909 | macrophages    | TGFBI      |
| CRYAB1     | 3.65E-270 | 1.199983247 | 0.605 | 0.116 | 2.24E-265   | 5.22E+00    | VSM_cells      | CRYAB      |
| BEX2       | 0         | 1.199662392 | 0.401 | 0.053 | 0           | 7.566037736 | Sertoli_cells  | BEX2       |
| RPL10A2    | 0         | 1.199634424 | 0.916 | 0.652 | 0           | 1.404907975 | Leydig_cells   | RPL10A     |
| RPL122     | 5.07E-301 | 1.199054977 | 0.886 | 0.625 | 3.11E-296   | 1.42E+00    | Leydig_cells   | RPL12      |
| AHNAK      | 4.28E-255 | 1.198802743 | 0.772 | 0.163 | 2.63E-250   | 4.74E+00    | endotheliocyte | AHNAK      |
| FAM187B    | 0         | 1.197135094 | 0.657 | 0.155 | 0           | 4.238709677 | spermatid      | FAM187B    |
| FXD12      | 0         | 1.197076002 | 0.632 | 0.044 | 0           | 14.36363636 | VSM_cells      | FXD1       |
| ZFH31      | 0         | 1.196508471 | 0.613 | 0.081 | 0           | 7.567901235 | VSM_cells      | ZFH3       |
| RPS171     | 4.88E-126 | 1.196227891 | 0.896 | 0.468 | 2.99E-121   | 1.91E+00    | endotheliocyte | RPS17      |
| JUNB1      | 4.50E-91  | 1.195959706 | 0.798 | 0.345 | 2.76E-86    | 2.31E+00    | macrophages    | JUNB       |
| LRRFIP11   | 1.25E-137 | 1.195598727 | 0.485 | 0.089 | 7.68E-133   | 5.45E+00    | macrophages    | LRRFIP1    |
| JAG11      | 0         | 1.195251288 | 0.588 | 0.042 | 0           | 14          | VSM_cells      | JAG1       |
| CFL13      | 3.29E-09  | 1.194860611 | 0.816 | 0.737 | 0.000201761 | 1.107191316 | T_cells        | CFL1       |
| MYC1       | 0         | 1.194609979 | 0.531 | 0.051 | 0           | 10.41176471 | Leydig_cells   | MYC        |
| LMCD1      | 0         | 1.193926766 | 0.613 | 0.039 | 0           | 15.71794872 | endotheliocyte | LMCD1      |
| FAM209B    | 0         | 1.193910109 | 0.737 | 0.434 | 0           | 1.698156682 | spermatid      | FAM209B    |
| DNAJC4     | 0         | 1.193855079 | 0.786 | 0.385 | 0           | 2.041558442 | spermatid      | DNAJC4     |
| DPYSL31    | 0         | 1.193359995 | 0.625 | 0.092 | 0           | 6.793478261 | PTM_cells      | DPYSL3     |
| FAM46C     | 0         | 1.193299674 | 0.761 | 0.376 | 0           | 2.02393617  | spermatid      | FAM46C     |
| MT-CO2     | 3.30E-186 | 1.193011962 | 0.517 | 0.414 | 2.02E-181   | 1.25E+00    | spermatogonia  | MT-CO2     |
| IRS2       | 1.05E-52  | 1.192648196 | 0.448 | 0.169 | 6.44E-48    | 2.65E+00    | macrophages    | IRS2       |
| PROCA1     | 0         | 1.192182995 | 0.868 | 0.621 | 0           | 1.397745572 | spermatid      | PROCA1     |
| RPL34      | 5.22E-117 | 1.192078927 | 0.98  | 0.905 | 3.20E-112   | 1.08E+00    | endotheliocyte | RPL34      |
| ACTN41     | 3.38E-235 | 1.191879921 | 0.655 | 0.155 | 2.07E-230   | 4.23E+00    | VSM_cells      | ACTN4      |
| SCML1      | 0         | 1.191640523 | 0.421 | 0.197 | 0           | 2.137055838 | spermatogonia  | SCML1      |
| HPRT11     | 0         | 1.191150444 | 0.509 | 0.141 | 0           | 3.609929078 | Sertoli_cells  | HPRT1      |
| HSPA1L     | 0         | 1.191018424 | 0.663 | 0.234 | 0           | 2.833333333 | spermatid      | HSPA1L     |
| HSPB12     | 0         | 1.190156823 | 0.722 | 0.196 | 0           | 3.683673469 | PTM_cells      | HSPB1      |
| ZFP36L23   | 0         | 1.190114711 | 0.682 | 0.121 | 0           | 5.636363636 | PTM_cells      | ZFP36L2    |
| COL1A21    | 0         | 1.189935716 | 0.76  | 0.153 | 0           | 4.967320261 | PTM_cells      | COL1A2     |
| TSSK2      | 0         | 1.189296809 | 0.814 | 0.438 | 0           | 1.858447489 | spermatid      | TSSK2      |
| FN11       | 0         | 1.188320298 | 0.567 | 0.065 | 0           | 8.723076923 | Leydig_cells   | FN1        |
| AHNAK4     | 1.54E-281 | 1.1877623   | 0.753 | 0.162 | 9.45E-277   | 4.65E+00    | VSM_cells      | AHNAK      |
| FDXR       | 0         | 1.187755739 | 0.43  | 0.088 | 0           | 4.886363636 | Sertoli_cells  | FDXR       |
| HLA.DMB    | 0         | 1.187721201 | 0.286 | 0.001 | 0           | 286         | macrophages    | HLA.DMB    |
| PEMT       | 0         | 1.187249853 | 0.61  | 0.082 | 0           | 7.43902439  | PTM_cells      | PEMT       |
| CCNL1      | 3.18E-156 | 1.187100527 | 0.816 | 0.34  | 1.95E-151   | 2.40E+00    | endotheliocyte | CCNL1      |
| H1FNT      | 0         | 1.186979413 | 0.867 | 0.488 | 0           | 1.776639344 | spermatid      | H1FNT      |
| TCEAL2     | 0         | 1.186787409 | 0.396 | 0.034 | 0           | 11.64705882 | Sertoli_cells  | TCEAL2     |
| RPLP16     | 8.69E-13  | 1.186660214 | 0.947 | 0.766 | 5.33E-08    | 1.24E+00    | T_cells        | RPLP1      |
| LINC01016  | 0         | 1.186592644 | 0.938 | 0.352 | 0           | 2.664772727 | spermatocyte   | LINC01016  |
| LINC00936  | 9.95E-195 | 1.186434555 | 0.38  | 0.039 | 6.10E-190   | 9.74E+00    | macrophages    | LINC00936  |
| IFIT3      | 0         | 1.186087643 | 0.516 | 0.024 | 0           | 21.5        | endotheliocyte | IFIT3      |
| ESAM       | 0         | 1.18564561  | 0.618 | 0.014 | 0           | 44.14285714 | endotheliocyte | ESAM       |
| RPL36      | 2.43E-118 | 1.185285758 | 0.903 | 0.699 | 1.49E-113   | 1.29E+00    | endotheliocyte | RPL36      |
| NEGR1      | 0         | 1.184893907 | 0.519 | 0.036 | 0           | 14.41666667 | Leydig_cells   | NEGR1      |
| NDUFA4L2   | 1.43E-226 | 1.184287472 | 0.368 | 0.048 | 8.78E-222   | 7.67E+00    | VSM_cells      | NDUFA4L2   |
| RPL232     | 0         | 1.184259527 | 0.909 | 0.694 | 0           | 1.309798271 | Leydig_cells   | RPL23      |
| FAM71F1    | 0         | 1.184216604 | 0.778 | 0.391 | 0           | 1.989769821 | spermatid      | FAM71F1    |
| COL6A21    | 0         | 1.183977619 | 0.739 | 0.093 | 0           | 7.946236559 | PTM_cells      | COL6A2     |
| SCP2D1     | 0         | 1.183189377 | 0.659 | 0.178 | 0           | 3.702247191 | spermatid      | SCP2D1     |
| MT-ND15    | 5.82E-41  | 1.182833515 | 0.488 | 0.406 | 3.57E-36    | 1.20E+00    | Sertoli_cells  | MT-ND1     |
| ACE        | 0         | 1.182582294 | 0.778 | 0.379 | 0           | 2.052770449 | spermatid      | ACE        |
| CALCRL     | 0         | 1.181930641 | 0.6   | 0.006 | 0           | 100         | endotheliocyte | CALCRL     |
| HLA-C1     | 1.06E-19  | 1.181879096 | 0.337 | 0.176 | 6.48E-15    | 1.91E+00    | macrophages    | HLA-C      |
| 06-Sep     | 0         | 1.18091148  | 0.414 | 0.054 | 0           | 7.666666667 | Sertoli_cells  | 06-Sep     |
| TGFBR2     | 0         | 1.180118694 | 0.573 | 0.023 | 0           | 24.91304348 | endotheliocyte | TGFBR2     |
| NDUFA41    | 1.38E-128 | 1.180068949 | 0.827 | 0.521 | 8.45E-124   | 1.59E+00    | VSM_cells      | NDUFA4     |
| NET1       | 3.46E-207 | 1.180000092 | 0.575 | 0.132 | 2.12E-202   | 4.36E+00    | VSM_cells      | NET1       |
| RILPL21    | 1.50E-112 | 1.179874574 | 0.397 | 0.072 | 9.18E-108   | 5.51E+00    | macrophages    | RILPL2     |
| SPATA12    | 0         | 1.179719401 | 0.692 | 0.174 | 0           | 3.977011494 | spermatid      | SPATA12    |

|             |           |             |       |       |           |             |                |             |
|-------------|-----------|-------------|-------|-------|-----------|-------------|----------------|-------------|
| SMKR1       | 0         | 1.179708153 | 0.884 | 0.575 | 0         | 1.537391304 | spermatid      | SMKR1       |
| FBN1        | 0         | 1.179613801 | 0.555 | 0.108 | 0         | 5.138888889 | Leydig_cells   | FBN1        |
| LEMD1       | 0         | 1.179408494 | 0.76  | 0.324 | 0         | 2.345679012 | spermatid      | LEMD1       |
| ABLIM1      | 6.07E-273 | 1.179025351 | 0.652 | 0.271 | 3.72E-268 | 2.41E+00    | Leydig_cells   | ABLIM1      |
| PRSS58      | 0         | 1.178982652 | 0.547 | 0.117 | 0         | 4.675213675 | spermatid      | PRSS58      |
| NFKBIA6     | 4.51E-10  | 1.178935348 | 0.579 | 0.214 | 2.77E-05  | 2.71E+00    | T_cells        | NFKBIA      |
| CLGN        | 0         | 1.178703266 | 0.972 | 0.389 | 0         | 2.498714653 | spermatocyte   | CLGN        |
| MTCO1P12    | 0         | 1.177774832 | 0.379 | 0.177 | 0         | 2.141242938 | spermatogonia  | MTCO1P12    |
| OTUB2       | 0         | 1.176821516 | 0.67  | 0.233 | 0         | 2.875536481 | spermatid      | OTUB2       |
| F8          | 0         | 1.176540286 | 0.591 | 0.018 | 0         | 32.83333333 | endotheliocyte | F8          |
| LDB2        | 0         | 1.176116554 | 0.623 | 0.026 | 0         | 23.96153846 | endotheliocyte | LDB2        |
| CXCL1       | 1.41E-169 | 1.175899616 | 0.131 | 0.005 | 8.68E-165 | 2.62E+01    | macrophages    | CXCL1       |
| RPL412      | 0         | 1.175891233 | 0.955 | 0.78  | 0         | 1.224358974 | Leydig_cells   | RPL41       |
| CLMN        | 0         | 1.175457952 | 0.66  | 0.26  | 0         | 2.538461538 | spermatid      | CLMN        |
| TFAM        | 0         | 1.175301117 | 0.73  | 0.424 | 0         | 1.721698113 | spermatid      | TFAM        |
| RPL183      | 0         | 1.174511111 | 0.881 | 0.558 | 0         | 1.578853047 | PTM_cells      | RPL18       |
| LYRM5       | 0         | 1.17442062  | 0.917 | 0.334 | 0         | 2.745508982 | spermatocyte   | LYRM5       |
| ZFP36L1     | 1.13E-145 | 1.173945971 | 0.856 | 0.391 | 6.93E-141 | 2.19E+00    | endotheliocyte | ZFP36L1     |
| ACSBG2      | 0         | 1.173266981 | 0.778 | 0.383 | 0         | 2.031331593 | spermatid      | ACSBG2      |
| RPL393      | 0         | 1.172845435 | 0.794 | 0.256 | 0         | 3.1015625   | PTM_cells      | RPL39       |
| CCDC173     | 0         | 1.172021164 | 0.991 | 0.48  | 0         | 2.064583333 | spermatocyte   | CCDC173     |
| NPC21       | 2.73E-58  | 1.172006432 | 0.721 | 0.443 | 1.67E-53  | 1.63E+00    | macrophages    | NPC2        |
| MT2A1       | 4.88E-225 | 1.171968753 | 0.567 | 0.218 | 2.99E-220 | 2.60E+00    | Leydig_cells   | MT2A        |
| ISG20L2     | 0         | 1.171852002 | 0.77  | 0.436 | 0         | 1.766055046 | spermatid      | ISG20L2     |
| HLA-F1      | 1.98E-31  | 1.171844426 | 0.474 | 0.057 | 1.21E-26  | 8.32E+00    | T_cells        | HLA-F       |
| ITGB12      | 2.14E-238 | 1.171453281 | 0.784 | 0.206 | 1.31E-233 | 3.81E+00    | VSM_cells      | ITGB1       |
| CCDC28B     | 0         | 1.171229551 | 0.4   | 0.07  | 0         | 5.714285714 | Sertoli_cells  | CCDC28B     |
| ACTL9       | 0         | 1.170685137 | 0.744 | 0.31  | 0         | 2.4         | spermatid      | ACTL9       |
| PRDX6       | 2.40E-276 | 1.169927424 | 0.744 | 0.625 | 1.47E-271 | 1.19E+00    | Sertoli_cells  | PRDX6       |
| SPATA18     | 0         | 1.169745379 | 0.755 | 0.349 | 0         | 2.163323782 | spermatid      | SPATA18     |
| B2M4        | 1.81E-278 | 1.169560139 | 0.899 | 0.241 | 1.11E-273 | 3.73E+00    | VSM_cells      | B2M         |
| RPS191      | 8.95E-140 | 1.16908061  | 0.958 | 0.756 | 5.49E-135 | 1.27E+00    | endotheliocyte | RPS19       |
| C10orf82    | 0         | 1.168513507 | 0.76  | 0.361 | 0         | 2.105263158 | spermatid      | C10orf82    |
| CCDC62      | 0         | 1.167739491 | 0.977 | 0.298 | 0         | 3.27852349  | spermatocyte   | CCDC62      |
| GSN3        | 0         | 1.167628153 | 0.75  | 0.188 | 0         | 3.989361702 | PTM_cells      | GSN         |
| C17orf74    | 0         | 1.16709969  | 0.681 | 0.186 | 0         | 3.661290323 | spermatid      | C17orf74    |
| MT-CO25     | 6.73E-11  | 1.166591976 | 0.816 | 0.436 | 4.13E-06  | 1.87E+00    | T_cells        | MT-CO2      |
| TEX35       | 0         | 1.16492325  | 0.771 | 0.386 | 0         | 1.997409326 | spermatid      | TEX35       |
| CASC5       | 0         | 1.164692089 | 0.68  | 0.222 | 0         | 3.063063063 | spermatogonia  | CASC5       |
| NFIA        | 0         | 1.164439691 | 0.643 | 0.197 | 0         | 3.263959391 | Leydig_cells   | NFIA        |
| IFI6        | 0         | 1.164181979 | 0.65  | 0.089 | 0         | 7.303370787 | endotheliocyte | IFI6        |
| PLAC91      | 0         | 1.163432819 | 0.606 | 0.061 | 0         | 9.93442623  | PTM_cells      | PLAC9       |
| IGFBP21     | 0         | 1.16320792  | 0.538 | 0.115 | 0         | 4.67826087  | PTM_cells      | IGFBP2      |
| ADGRF5      | 0         | 1.162702155 | 0.516 | 0.036 | 0         | 14.33333333 | endotheliocyte | ADGRF5      |
| BCAP31      | 0         | 1.16247561  | 0.57  | 0.14  | 0         | 4.071428571 | spermatogonia  | BCAP31      |
| RPS84       | 5.10E-129 | 1.161458988 | 0.896 | 0.774 | 3.13E-124 | 1.16E+00    | VSM_cells      | RPS8        |
| IRF14       | 1.00E-136 | 1.160449795 | 0.63  | 0.216 | 6.16E-132 | 2.92E+00    | VSM_cells      | IRF1        |
| MT-CO16     | 8.77E-11  | 1.160332997 | 0.816 | 0.453 | 5.38E-06  | 1.80E+00    | T_cells        | MT-CO1      |
| GNB2L1      | 1.30E-74  | 1.160307049 | 0.712 | 0.468 | 8.00E-70  | 1.52E+00    | endotheliocyte | GNB2L1      |
| EEF1A12     | 0         | 1.159985046 | 0.987 | 0.922 | 0         | 1.070498915 | Leydig_cells   | EEF1A1      |
| C1orf100    | 0         | 1.159907695 | 0.655 | 0.256 | 0         | 2.55859375  | spermatid      | C1orf100    |
| RPS27A5     | 5.41E-11  | 1.159704956 | 0.895 | 0.861 | 3.32E-06  | 1.04E+00    | T_cells        | RPS27A      |
| CD69        | 0         | 1.159219656 | 0.306 | 0.006 | 0         | 51          | macrophages    | CD69        |
| PFKFB3      | 5.42E-106 | 1.159028221 | 0.306 | 0.045 | 3.32E-101 | 6.80E+00    | macrophages    | PFKFB3      |
| AC004381.6  | 0         | 1.158955475 | 0.988 | 0.466 | 0         | 2.120171674 | spermatocyte   | AC004381.6  |
| PTMS3       | 7.98E-247 | 1.158769228 | 0.786 | 0.204 | 4.89E-242 | 3.85E+00    | VSM_cells      | PTMS        |
| FCGRT1      | 1.24E-74  | 1.158606508 | 0.545 | 0.191 | 7.63E-70  | 2.85E+00    | macrophages    | FCGRT       |
| SPTBN12     | 0         | 1.158599439 | 0.764 | 0.281 | 0         | 2.71886121  | PTM_cells      | SPTBN1      |
| EDN1        | 2.16E-219 | 1.158274387 | 0.308 | 0.029 | 1.32E-214 | 1.06E+01    | endotheliocyte | EDN1        |
| RPS293      | 8.28E-16  | 1.158075908 | 0.947 | 0.886 | 5.08E-11  | 1.07E+00    | T_cells        | RPS29       |
| SPTY2D1.AS1 | 0         | 1.157466453 | 0.389 | 0.158 | 0         | 2.462025316 | spermatid      | SPTY2D1.AS1 |
| SYNE2       | 4.83E-292 | 1.156232484 | 0.401 | 0.117 | 2.96E-287 | 3.43E+00    | Sertoli_cells  | SYNE2       |
| RPL27A      | 4.26E-148 | 1.156193708 | 0.955 | 0.785 | 2.61E-143 | 1.22E+00    | endotheliocyte | RPL27A      |
| ST6GALNAC2  | 0         | 1.155524459 | 0.74  | 0.333 | 0         | 2.222222222 | spermatid      | ST6GALNAC2  |
| GUCY1A3     | 0         | 1.155514646 | 0.575 | 0.008 | 0         | 71.875      | VSM_cells      | GUCY1A3     |
| CTGF1       | 0         | 1.155092412 | 0.483 | 0.051 | 0         | 9.470588235 | PTM_cells      | CTGF        |
| TRGC2       | 2.46E-22  | 1.154485228 | 0.289 | 0.029 | 1.51E-17  | 9.97E+00    | T_cells        | TRGC2       |
| AHNAK1      | 6.44E-95  | 1.154433345 | 0.586 | 0.168 | 3.95E-90  | 3.49E+00    | macrophages    | AHNAK       |
| RPL8        | 6.07E-148 | 1.153994163 | 0.953 | 0.854 | 3.72E-143 | 1.12E+00    | endotheliocyte | RPL8        |
| RPL214      | 0         | 1.153922848 | 0.912 | 0.455 | 0         | 2.004395604 | PTM_cells      | RPL21       |
| JUND2       | 1.12E-217 | 1.153840877 | 0.781 | 0.492 | 6.87E-213 | 1.59E+00    | Leydig_cells   | JUND        |
| HLA-DQA2    | 0         | 1.153724242 | 0.276 | 0.004 | 0         | 69          | macrophages    | HLA-DQA2    |
| PTRF1       | 0         | 1.153538591 | 0.612 | 0.099 | 0         | 6.181818182 | Leydig_cells   | PTRF        |
| RPL64       | 1.70E-127 | 1.153207381 | 0.875 | 0.681 | 1.04E-122 | 1.28E+00    | VSM_cells      | RPL6        |
| HORMAD1     | 0         | 1.152618246 | 0.632 | 0.404 | 0         | 1.564356436 | spermatogonia  | HORMAD1     |

|               |           |             |       |       |             |             |                |               |
|---------------|-----------|-------------|-------|-------|-------------|-------------|----------------|---------------|
| AARD          | 6.23E-265 | 1.152473007 | 0.475 | 0.186 | 3.82E-260   | 2.55E+00    | Sertoli_cells  | AARD          |
| CFLAR1        | 3.76E-54  | 1.151379353 | 0.556 | 0.263 | 2.31E-49    | 2.11E+00    | macrophages    | CFLAR         |
| OGN2          | 4.60E-227 | 1.15111707  | 0.465 | 0.072 | 2.82E-222   | 6.46E+00    | VSM_cells      | OGN           |
| RAC22         | 2.52E-274 | 1.150653777 | 0.421 | 0.005 | 1.54E-269   | 8.42E+01    | T_cells        | RAC2          |
| RP5.1023B21.1 | 0         | 1.149621915 | 0.379 | 0.108 | 0           | 3.509259259 | spermatocyte   | RP5.1023B21.1 |
| PRF1          | 0         | 1.14859051  | 0.368 | 0     | 0           | #DIV/0!     | T_cells        | PRF1          |
| SNRPC         | 0         | 1.148132833 | 0.952 | 0.416 | 0           | 2.288461538 | spermatocyte   | SNRPC         |
| TSPO          | 0         | 1.147741886 | 0.643 | 0.084 | 0           | 7.654761905 | endotheliocyte | TSPO          |
| FNDC8         | 0         | 1.147612252 | 0.664 | 0.176 | 0           | 3.772727273 | spermatid      | FNDC8         |
| FAM134B       | 0         | 1.146976817 | 0.734 | 0.275 | 0           | 2.669090909 | spermatid      | FAM134B       |
| SSPN1         | 0         | 1.146466351 | 0.653 | 0.069 | 0           | 9.463768116 | PTM_cells      | SSPN          |
| EGFR          | 0         | 1.146376351 | 0.506 | 0.049 | 0           | 10.32653061 | Leydig_cells   | EGFR          |
| ZEB2          | 1.20E-139 | 1.146153985 | 0.458 | 0.078 | 7.38E-135   | 5.87E+00    | macrophages    | ZEB2          |
| EFNB2         | 0         | 1.145925026 | 0.558 | 0.02  | 0           | 27.9        | endotheliocyte | EFNB2         |
| RPL37         | 1.85E-159 | 1.145880837 | 0.97  | 0.803 | 1.13E-154   | 1.21E+00    | endotheliocyte | RPL37         |
| VIM3          | 0         | 1.145861632 | 0.912 | 0.429 | 0           | 2.125874126 | PTM_cells      | VIM           |
| RPL115        | 1.06E-13  | 1.14537865  | 0.947 | 0.826 | 6.50E-09    | 1.15E+00    | T_cells        | RPL11         |
| GTF2A2        | 0         | 1.144773243 | 0.989 | 0.683 | 0           | 1.448023426 | spermatocyte   | GTF2A2        |
| SOCS34        | 8.01E-294 | 1.144648977 | 0.666 | 0.117 | 4.92E-289   | 5.69E+00    | VSM_cells      | SOCS3         |
| TUBB1         | 0         | 1.144316889 | 0.715 | 0.23  | 0           | 3.108695652 | Leydig_cells   | TUBB          |
| SLC25A41      | 1.02E-204 | 1.144310993 | 0.436 | 0.191 | 6.25E-200   | 2.28E+00    | Sertoli_cells  | SLC25A4       |
| ACTRT2        | 0         | 1.143980063 | 0.839 | 0.435 | 0           | 1.928735632 | spermatid      | ACTRT2        |
| RPLP13        | 0         | 1.143913491 | 0.948 | 0.757 | 0           | 1.252311757 | PTM_cells      | RPLP1         |
| CARHSP1       | 0         | 1.143749159 | 0.888 | 0.628 | 0           | 1.414012739 | spermatid      | CARHSP1       |
| NGFRAP11      | 0         | 1.143372496 | 0.617 | 0.115 | 0           | 5.365217391 | PTM_cells      | NGFRAP1       |
| DCN1          | 0         | 1.142679619 | 0.842 | 0.121 | 0           | 6.958677686 | PTM_cells      | DCN           |
| HLA-DMA1      | 4.12E-261 | 1.142501509 | 0.283 | 0.015 | 2.53E-256   | 1.89E+01    | macrophages    | HLA-DMA       |
| FBLN5         | 0         | 1.140763631 | 0.529 | 0.078 | 0           | 6.782051282 | Leydig_cells   | FBLN5         |
| APP1          | 0         | 1.140695341 | 0.75  | 0.328 | 0           | 2.286585366 | Leydig_cells   | APP           |
| MAF           | 2.71E-125 | 1.140666247 | 0.424 | 0.072 | 1.66E-120   | 5.89E+00    | macrophages    | MAF           |
| SLC25A25      | 0         | 1.140283424 | 0.573 | 0.052 | 0           | 11.01923077 | endotheliocyte | SLC25A25      |
| HSPA1B2       | 0         | 1.139868601 | 0.607 | 0.178 | 0           | 3.41011236  | Leydig_cells   | HSPA1B        |
| NR2F23        | 9.59E-261 | 1.139787009 | 0.729 | 0.16  | 5.89E-256   | 4.56E+00    | VSM_cells      | NR2F2         |
| XAF1          | 0         | 1.139580375 | 0.581 | 0.039 | 0           | 14.8974359  | endotheliocyte | XAF1          |
| LY6E          | 0         | 1.139393541 | 0.707 | 0.11  | 0           | 6.427272727 | endotheliocyte | LY6E          |
| PTGES3        | 0         | 1.139057468 | 0.824 | 0.451 | 0           | 1.827050998 | spermatogonia  | PTGES3        |
| MNDA          | 0         | 1.138192234 | 0.391 | 0.008 | 0           | 48.875      | macrophages    | MNDA          |
| MT.ND1        | 2.65E-65  | 1.137872856 | 0.393 | 0.376 | 1.62E-60    | 1.05E+00    | spermatogonia  | MT.ND1        |
| RPL415        | 0         | 1.137756244 | 0.895 | 0.78  | 0           | 1.147435897 | Sertoli_cells  | RPL41         |
| RARRES2       | 0         | 1.137315346 | 0.565 | 0.065 | 0           | 8.692307692 | Leydig_cells   | RARRES2       |
| TMEM31        | 0         | 1.136454822 | 0.654 | 0.257 | 0           | 2.544747082 | spermatid      | TMEM31        |
| ITM2A3        | 3.83E-26  | 1.135321999 | 0.526 | 0.078 | 2.35E-21    | 6.74E+00    | T_cells        | ITM2A         |
| ITGA8         | 0         | 1.135196677 | 0.564 | 0.004 | 0           | 141         | VSM_cells      | ITGA8         |
| RPL65         | 1.72E-12  | 1.134489377 | 0.895 | 0.684 | 1.06E-07    | 1.31E+00    | T_cells        | RPL6          |
| THY1          | 0         | 1.134395018 | 0.453 | 0.025 | 0           | 18.12       | Leydig_cells   | THY1          |
| SCCPDH        | 0         | 1.134084837 | 0.994 | 0.621 | 0           | 1.600644122 | spermatocyte   | SCCPDH        |
| RHOB3         | 0         | 1.13366186  | 0.724 | 0.217 | 0           | 3.33640553  | PTM_cells      | RHOB          |
| TXNDC2        | 0         | 1.133497761 | 0.657 | 0.224 | 0           | 2.933035714 | spermatid      | TXNDC2        |
| C10orf120     | 0         | 1.133141718 | 0.613 | 0.178 | 0           | 3.443820225 | spermatid      | C10orf120     |
| MT.ND5        | 2.91E-115 | 1.132683616 | 0.384 | 0.3   | 1.79E-110   | 1.28E+00    | spermatogonia  | MT.ND5        |
| MT1E          | 0         | 1.132163828 | 0.546 | 0.061 | 0           | 8.950819672 | endotheliocyte | MT1E          |
| CCDC70        | 0         | 1.131775041 | 0.805 | 0.374 | 0           | 2.152406417 | spermatid      | CCDC70        |
| RPL18A4       | 0         | 1.130735533 | 0.85  | 0.396 | 0           | 2.146464646 | PTM_cells      | RPL18A        |
| SMARCA11      | 0         | 1.130729821 | 0.455 | 0.116 | 0           | 3.922413793 | Sertoli_cells  | SMARCA1       |
| TRIB1         | 3.14E-247 | 1.130242553 | 0.34  | 0.024 | 1.92E-242   | 1.42E+01    | macrophages    | TRIB1         |
| MT.ND12       | 8.36E-09  | 1.130242518 | 0.351 | 0.381 | 0.000512786 | 0.921259843 | Sertoli_cells  | MT.ND1        |
| TEX37         | 0         | 1.1302264   | 0.631 | 0.159 | 0           | 3.968553459 | spermatid      | TEX37         |
| MT.ND2        | 1.91E-59  | 1.130186724 | 0.393 | 0.383 | 1.17E-54    | 1.03E+00    | spermatogonia  | MT.ND2        |
| TMEM191C      | 0         | 1.129825747 | 0.622 | 0.274 | 0           | 2.270072993 | spermatid      | TMEM191C      |
| EFNA1         | 0         | 1.128753745 | 0.529 | 0.014 | 0           | 37.78571429 | endotheliocyte | EFNA1         |
| KIF2B         | 0         | 1.128023939 | 0.739 | 0.331 | 0           | 2.232628399 | spermatid      | KIF2B         |
| MNS1          | 0         | 1.127603544 | 0.976 | 0.389 | 0           | 2.508997429 | spermatocyte   | MNS1          |
| GSTA2         | 0         | 1.12712618  | 0.352 | 0.014 | 0           | 25.14285714 | Sertoli_cells  | GSTA2         |
| CRIM11        | 0         | 1.12687282  | 0.59  | 0.042 | 0           | 14.04761905 | VSM_cells      | CRIM1         |
| GYG1          | 0         | 1.126662573 | 0.925 | 0.399 | 0           | 2.318295739 | spermatocyte   | GYG1          |
| NR4A12        | 2.27E-301 | 1.126275614 | 0.634 | 0.242 | 1.39E-296   | 2.62E+00    | PTM_cells      | NR4A1         |
| ZFP363        | 0         | 1.125799009 | 0.75  | 0.218 | 0           | 3.440366972 | PTM_cells      | ZFP36         |
| SNHG8         | 4.33E-140 | 1.12546591  | 0.747 | 0.303 | 2.65E-135   | 2.47E+00    | endotheliocyte | SNHG8         |
| MT-ND54       | 4.08E-12  | 1.12546542  | 0.763 | 0.297 | 2.50E-07    | 2.57E+00    | T_cells        | MT-ND5        |
| PDGFRA        | 0         | 1.12484676  | 0.526 | 0.049 | 0           | 10.73469388 | Leydig_cells   | PDGFRA        |
| FYB           | 1.58E-141 | 1.124619129 | 0.414 | 0.064 | 9.68E-137   | 6.47E+00    | macrophages    | FYB           |
| RSRP11        | 7.31E-08  | 1.124193705 | 0.553 | 0.282 | 0.004481985 | 1.960992908 | T_cells        | RSRP1         |
| TNP2          | 0         | 1.124094274 | 0.475 | 0.134 | 0           | 3.544776119 | spermatid      | TNP2          |
| ARPC1B1       | 9.06E-137 | 1.123996042 | 0.444 | 0.074 | 5.56E-132   | 6.00E+00    | macrophages    | ARPC1B        |
| MT.CYB        | 8.29E-85  | 1.123525967 | 0.383 | 0.322 | 5.08E-80    | 1.19E+00    | spermatogonia  | MT.CYB        |



|               |           |             |       |       |           |             |                |              |
|---------------|-----------|-------------|-------|-------|-----------|-------------|----------------|--------------|
| TEX38         | 0         | 1.123400653 | 0.903 | 0.531 | 0         | 1.700564972 | spermatid      | TEX38        |
| EMP32         | 0         | 1.123233358 | 0.59  | 0.146 | 0         | 4.04109589  | Leydig_cells   | EMP3         |
| PRDX22        | 0         | 1.123196057 | 0.646 | 0.083 | 0         | 7.78313253  | PTM_cells      | PRDX2        |
| MAF1          | 0         | 1.122772721 | 0.529 | 0.056 | 0         | 9.446428571 | Leydig_cells   | MAF          |
| ACTN4         | 2.04E-220 | 1.122427637 | 0.69  | 0.156 | 1.25E-215 | 4.42E+00    | endotheliocyte | ACTN4        |
| SPATA20       | 0         | 1.12219738  | 0.78  | 0.399 | 0         | 1.954887218 | spermatid      | SPATA20      |
| MT-ND4L2      | 5.94E-225 | 1.121773447 | 0.715 | 0.176 | 3.65E-220 | 4.06E+00    | VSM_cells      | MT-ND4L      |
| CCT6B         | 0         | 1.12148102  | 0.991 | 0.492 | 0         | 2.014227642 | spermatocyte   | CCT6B        |
| SPINT2        | 0         | 1.121256508 | 0.777 | 0.453 | 0         | 1.715231788 | spermatogonia  | SPINT2       |
| B2M3          | 0         | 1.12120889  | 0.888 | 0.22  | 0         | 4.036363636 | PTM_cells      | B2M          |
| TUBA4A        | 0         | 1.121182489 | 0.657 | 0.188 | 0         | 3.494680851 | spermatid      | TUBA4A       |
| FHL5          | 0         | 1.120662874 | 0.785 | 0.401 | 0         | 1.957605985 | spermatid      | FHL5         |
| SLIT3         | 0         | 1.120347206 | 0.577 | 0.082 | 0         | 7.036585366 | VSM_cells      | SLIT3        |
| PCOLCE        | 0         | 1.119615693 | 0.503 | 0.101 | 0         | 4.98019802  | Leydig_cells   | PCOLCE       |
| BANF2         | 0         | 1.119243498 | 0.708 | 0.273 | 0         | 2.593406593 | spermatid      | BANF2        |
| HSP90AA1      | 0         | 1.11843778  | 0.983 | 0.844 | 0         | 1.164691943 | spermatogonia  | HSP90AA1     |
| TMCO5A        | 0         | 1.118417922 | 0.85  | 0.469 | 0         | 1.812366738 | spermatid      | TMCO5A       |
| MT-CO1        | 2.21E-164 | 1.117629406 | 0.521 | 0.435 | 1.36E-159 | 1.20E+00    | spermatogonia  | MT-CO1       |
| UBL4B         | 0         | 1.117262681 | 0.828 | 0.461 | 0         | 1.796095445 | spermatid      | UBL4B        |
| PTGER4        | 7.49E-113 | 1.117167741 | 0.397 | 0.073 | 4.60E-108 | 5.44E+00    | macrophages    | PTGER4       |
| LPIN1         | 0         | 1.116924348 | 0.708 | 0.326 | 0         | 2.171779141 | spermatid      | LPIN1        |
| KDM6B         | 2.97E-51  | 1.116676153 | 0.512 | 0.226 | 1.82E-46  | 2.27E+00    | macrophages    | KDM6B        |
| ID4           | 2.73E-216 | 1.116524662 | 0.514 | 0.092 | 1.68E-211 | 5.59E+00    | VSM_cells      | ID4          |
| MMRN2         | 0         | 1.116377598 | 0.568 | 0.008 | 0         | 71          | endotheliocyte | MMRN2        |
| CDKN1A3       | 4.48E-224 | 1.116099868 | 0.6   | 0.122 | 2.75E-219 | 4.92E+00    | VSM_cells      | CDKN1A       |
| GKAP1         | 0         | 1.115976427 | 0.994 | 0.672 | 0         | 1.479166667 | spermatocyte   | GKAP1        |
| GMPR          | 0         | 1.115784926 | 0.399 | 0.096 | 0         | 4.15625     | Sertoli_cells  | GMPR         |
| VEGFA         | 1.42E-268 | 1.115361063 | 0.34  | 0.022 | 8.72E-264 | 1.55E+01    | macrophages    | VEGFA        |
| RP5.1052M9.12 | 2.32E-57  | 1.114761138 | 0.35  | 0.202 | 1.43E-52  | 1.73E+00    | Leydig_cells   | RP5.1052M9.1 |
| CKS2          | 0         | 1.114743437 | 0.804 | 0.373 | 0         | 2.155495979 | spermatogonia  | CKS2         |
| RPL413        | 0         | 1.114402186 | 0.93  | 0.78  | 0         | 1.192307692 | PTM_cells      | RPL41        |
| MAP3K81       | 3.01E-291 | 1.114324377 | 0.391 | 0.027 | 1.85E-286 | 1.45E+01    | macrophages    | MAP3K8       |
| FLRT2         | 0         | 1.113798876 | 0.523 | 0.046 | 0         | 11.36956522 | Leydig_cells   | FLRT2        |
| GSTM5         | 0         | 1.112910242 | 0.47  | 0.058 | 0         | 8.103448276 | Leydig_cells   | GSTM5        |
| CSRP1         | 0         | 1.112255012 | 0.613 | 0.092 | 0         | 6.663043478 | PTM_cells      | CSRP1        |
| HMGB1         | 0         | 1.111879515 | 0.765 | 0.493 | 0         | 1.551724138 | spermatogonia  | HMGB1        |
| SH3BGRL5      | 0         | 1.11067493  | 0.67  | 0.103 | 0         | 6.504854369 | VSM_cells      | SH3BGRL      |
| RPL63         | 0         | 1.108946256 | 0.891 | 0.673 | 0         | 1.323922734 | PTM_cells      | RPL6         |
| GIMAP4        | 0         | 1.107603444 | 0.6   | 0.003 | 0         | 200         | endotheliocyte | GIMAP4       |
| MT.CO12       | 6.59E-15  | 1.107295219 | 0.35  | 0.339 | 4.04E-10  | 1.03E+00    | Sertoli_cells  | MT.CO1       |
| GPR1831       | 3.86E-45  | 1.107271701 | 0.289 | 0.014 | 2.37E-40  | 2.06E+01    | T_cells        | GPR183       |
| ICAM3         | 2.34E-15  | 1.107108716 | 0.395 | 0.078 | 1.43E-10  | 5.06E+00    | T_cells        | ICAM3        |
| DPEP1         | 0         | 1.10689794  | 0.568 | 0.153 | 0         | 3.712418301 | Leydig_cells   | DPEP1        |
| CD37          | 3.34E-91  | 1.106878886 | 0.505 | 0.138 | 2.05E-86  | 3.66E+00    | macrophages    | CD37         |
| EID12         | 0         | 1.105594623 | 0.78  | 0.345 | 0         | 2.260869565 | PTM_cells      | EID1         |
| EEF1A16       | 2.55E-15  | 1.105122166 | 0.974 | 0.925 | 1.56E-10  | 1.05E+00    | T_cells        | EEF1A1       |
| C11orf96      | 0         | 1.104558804 | 0.705 | 0.258 | 0         | 2.73255814  | Leydig_cells   | C11orf96     |
| S100A63       | 0         | 1.104436364 | 0.691 | 0.105 | 0         | 6.580952381 | PTM_cells      | S100A6       |
| SYNPO21       | 0         | 1.104246504 | 0.598 | 0.051 | 0         | 11.7254902  | VSM_cells      | SYNPO2       |
| TRIM36        | 0         | 1.104152115 | 0.867 | 0.631 | 0         | 1.374009509 | spermatid      | TRIM36       |
| DPT           | 0         | 1.103779379 | 0.454 | 0.029 | 0         | 15.65517241 | Leydig_cells   | DPT          |
| TXNIP4        | 1.94E-11  | 1.103300395 | 0.553 | 0.174 | 1.19E-06  | 3.18E+00    | T_cells        | TXNIP        |
| PRPS21        | 0         | 1.103260502 | 0.609 | 0.071 | 0         | 8.577464789 | PTM_cells      | PRPS2        |
| PSMD1         | 0         | 1.103137701 | 0.658 | 0.155 | 0         | 4.24516129  | spermatogonia  | PSMD1        |
| FTH12         | 0         | 1.102735229 | 0.969 | 0.712 | 0         | 1.360955056 | Leydig_cells   | FTH1         |
| SLC25A64      | 6.95E-242 | 1.10254489  | 0.755 | 0.186 | 4.26E-237 | 4.06E+00    | VSM_cells      | SLC25A6      |
| VCX3B         | 0         | 1.102279442 | 0.486 | 0.115 | 0         | 4.226086957 | spermatogonia  | VCX3B        |
| LRP11         | 0         | 1.102180729 | 0.562 | 0.064 | 0         | 8.78125     | Leydig_cells   | LRP1         |
| DUSP12        | 0         | 1.102081439 | 0.65  | 0.166 | 0         | 3.915662651 | Leydig_cells   | DUSP1        |
| PPIB1         | 0         | 1.100648308 | 0.695 | 0.273 | 0         | 2.545787546 | PTM_cells      | PPIB         |
| SMC4          | 0         | 1.100422665 | 0.749 | 0.352 | 0         | 2.127840909 | spermatogonia  | SMC4         |
| RPL265        | 1.04E-11  | 1.100397856 | 0.895 | 0.755 | 6.40E-07  | 1.19E+00    | T_cells        | RPL26        |
| IQGAP2        | 0         | 1.100035781 | 0.743 | 0.38  | 0         | 1.955263158 | spermatid      | IQGAP2       |
| VCX           | 0         | 1.099264382 | 0.472 | 0.13  | 0         | 3.630769231 | spermatogonia  | VCX          |
| PRRX1         | 1.55E-264 | 1.09886664  | 0.75  | 0.393 | 9.48E-260 | 1.91E+00    | Leydig_cells   | PRRX1        |
| SNED1         | 0         | 1.098710445 | 0.494 | 0.041 | 0         | 12.04878049 | Leydig_cells   | SNED1        |
| GPSM31        | 4.77E-40  | 1.098674797 | 0.368 | 0.027 | 2.93E-35  | 1.36E+01    | T_cells        | GPSM3        |
| 14-Sep        | 0         | 1.0985805   | 0.374 | 0.016 | 0         | 23.375      | Sertoli_cells  | 14-Sep       |
| MTUS1         | 1.09E-228 | 1.098274234 | 0.625 | 0.124 | 6.66E-224 | 5.04E+00    | endotheliocyte | MTUS1        |
| ZFAND51       | 1.96E-28  | 1.098211777 | 0.63  | 0.485 | 1.20E-23  | 1.30E+00    | macrophages    | ZFAND5       |
| SEPW11        | 1.69E-126 | 1.097504363 | 0.812 | 0.53  | 1.04E-121 | 1.53E+00    | VSM_cells      | SEPW1        |
| KLF64         | 3.84E-167 | 1.097205163 | 0.759 | 0.283 | 2.36E-162 | 2.68E+00    | VSM_cells      | KLF6         |
| TSSK1B        | 0         | 1.096826745 | 0.743 | 0.321 | 0         | 2.314641745 | spermatid      | TSSK1B       |
| RPL9          | 1.96E-154 | 1.096096034 | 0.97  | 0.873 | 1.20E-149 | 1.11E+00    | endotheliocyte | RPL9         |
| RPS144        | 6.67E-138 | 1.096072503 | 0.941 | 0.829 | 4.09E-133 | 1.14E+00    | VSM_cells      | RPS14        |

|              |           |             |       |       |             |             |                |              |
|--------------|-----------|-------------|-------|-------|-------------|-------------|----------------|--------------|
| ZPBP         | 0         | 1.095913439 | 0.988 | 0.48  | 0           | 2.058333333 | spermatocyte   | ZPBP         |
| EIF4E        | 0         | 1.095828168 | 0.771 | 0.492 | 0           | 1.567073171 | spermatid      | EIF4E        |
| SPTY2D1-AS1  | 8.38E-277 | 1.095272159 | 0.506 | 0.437 | 5.14E-272   | 1.16E+00    | spermatid      | SPTY2D1-AS1  |
| ECM2         | 0         | 1.095150564 | 0.514 | 0.044 | 0           | 11.68181818 | Leydig_cells   | ECM2         |
| RPL10P32     | 5.78E-275 | 1.094791612 | 0.287 | 0.046 | 3.54E-270   | 6.24E+00    | Leydig_cells   | RPL10P3      |
| HLA-E1       | 5.82E-57  | 1.094720724 | 0.333 | 0.086 | 3.57E-52    | 3.87E+00    | macrophages    | HLA-E        |
| CD634        | 1.92E-183 | 1.094631106 | 0.82  | 0.283 | 1.18E-178   | 2.90E+00    | VSM_cells      | CD63         |
| NFKB1        | 1.85E-104 | 1.094193086 | 0.391 | 0.074 | 1.13E-99    | 5.28E+00    | macrophages    | NFKB1        |
| LMNA         | 1.88E-125 | 1.094074886 | 0.784 | 0.366 | 1.15E-120   | 2.14E+00    | endotheliocyte | LMNA         |
| FXVD6        | 0         | 1.093906174 | 0.595 | 0.093 | 0           | 6.397849462 | Leydig_cells   | FXVD6        |
| RPL18A3      | 1.84E-260 | 1.093560693 | 0.803 | 0.401 | 1.13E-255   | 2.00E+00    | Leydig_cells   | RPL18A       |
| DUSP13       | 0         | 1.093369603 | 0.671 | 0.161 | 0           | 4.167701863 | PTM_cells      | DUSP1        |
| ACTB2        | 0         | 1.093308235 | 0.925 | 0.572 | 0           | 1.617132867 | Leydig_cells   | ACTB         |
| C1S1         | 0         | 1.093098148 | 0.681 | 0.076 | 0           | 8.960526316 | PTM_cells      | C1S          |
| PDLIM1       | 7.68E-289 | 1.092850036 | 0.605 | 0.091 | 4.71E-284   | 6.65E+00    | endotheliocyte | PDLIM1       |
| CRISPLD21    | 0         | 1.092630202 | 0.612 | 0.1   | 0           | 6.12        | PTM_cells      | CRISPLD2     |
| RPL306       | 4.69E-15  | 1.092321233 | 0.947 | 0.879 | 2.87E-10    | 1.08E+00    | T_cells        | RPL30        |
| HHIP         | 0         | 1.092075877 | 0.468 | 0.015 | 0           | 31.2        | Leydig_cells   | HHIP         |
| RPL125       | 5.08E-09  | 1.091666505 | 0.816 | 0.635 | 0.000311604 | 1.28503937  | T_cells        | RPL12        |
| CBX1         | 0         | 1.091212379 | 0.716 | 0.232 | 0           | 3.086206897 | spermatogonia  | CBX1         |
| MYH9         | 1.64E-183 | 1.090737106 | 0.643 | 0.157 | 1.01E-178   | 4.10E+00    | endotheliocyte | MYH9         |
| EGR15        | 3.04E-68  | 1.090456843 | 0.386 | 0.255 | 1.87E-63    | 1.51E+00    | Sertoli_cells  | EGR1         |
| SDCBP        | 5.15E-183 | 1.090142545 | 0.687 | 0.185 | 3.16E-178   | 3.71E+00    | endotheliocyte | SDCBP        |
| RPS182       | 0         | 1.090066004 | 0.973 | 0.848 | 0           | 1.14740566  | Leydig_cells   | RPS18        |
| SERPINF11    | 0         | 1.089352973 | 0.698 | 0.122 | 0           | 5.721311475 | PTM_cells      | SERPINF1     |
| PFN4         | 0         | 1.089152562 | 0.949 | 0.304 | 0           | 3.121710526 | spermatocyte   | PFN4         |
| RP5-942I16.1 | 0         | 1.08874198  | 0.564 | 0.228 | 0           | 2.473684211 | spermatocyte   | RP5-942I16.1 |
| SDPR         | 0         | 1.087204731 | 0.444 | 0.038 | 0           | 11.68421053 | endotheliocyte | SDPR         |
| GS1-259H13.2 | 0         | 1.08717613  | 0.565 | 0.233 | 0           | 2.424892704 | spermatocyte   | GS1-259H13.2 |
| SOD21        | 1.42E-31  | 1.086753643 | 0.623 | 0.5   | 8.71E-27    | 1.25E+00    | macrophages    | SOD2         |
| NEXN         | 0         | 1.086496872 | 0.584 | 0.09  | 0           | 6.488888889 | PTM_cells      | NEXN         |
| MSN1         | 4.79E-159 | 1.085204053 | 0.455 | 0.067 | 2.94E-154   | 6.79E+00    | macrophages    | MSN          |
| RASGEF1B     | 0         | 1.085114794 | 0.384 | 0.017 | 0           | 22.58823529 | macrophages    | RASGEF1B     |
| PHOSPHO1     | 0         | 1.085054286 | 0.592 | 0.162 | 0           | 3.654320988 | spermatid      | PHOSPHO1     |
| MBNL11       | 3.37E-102 | 1.084749967 | 0.458 | 0.101 | 2.07E-97    | 4.53E+00    | macrophages    | MBNL1        |
| RPS12        | 0         | 1.084612316 | 0.903 | 0.815 | 0           | 1.10797546  | spermatogonia  | RPS12        |
| SPAG6        | 0         | 1.084254332 | 0.949 | 0.312 | 0           | 3.041666667 | spermatocyte   | SPAG6        |
| SPTBN1       | 7.27E-147 | 1.083358676 | 0.789 | 0.298 | 4.46E-142   | 2.65E+00    | endotheliocyte | SPTBN1       |
| SLC2A33      | 5.81E-12  | 1.082967705 | 0.395 | 0.093 | 3.56E-07    | 4.25E+00    | T_cells        | SLC2A3       |
| FAM110D      | 0         | 1.082843095 | 0.469 | 0.002 | 0           | 234.5       | endotheliocyte | FAM110D      |
| EIF1B        | 0         | 1.082792279 | 0.755 | 0.447 | 0           | 1.689038031 | spermatogonia  | EIF1B        |
| C12orf54     | 0         | 1.08267786  | 0.674 | 0.291 | 0           | 2.316151203 | spermatid      | C12orf54     |
| NR4A13       | 2.32E-149 | 1.082498431 | 0.706 | 0.254 | 1.42E-144   | 2.78E+00    | VSM_cells      | NR4A1        |
| NAA20        | 0         | 1.082432973 | 0.966 | 0.378 | 0           | 2.555555556 | spermatocyte   | NAA20        |
| ADAMTS13     | 5.72E-262 | 1.082095574 | 0.537 | 0.083 | 3.51E-257   | 6.47E+00    | VSM_cells      | ADAMTS1      |
| SDC4         | 0         | 1.081637305 | 0.337 | 0.021 | 0           | 16.04761905 | Sertoli_cells  | SDC4         |
| KIAA1210     | 0         | 1.081445973 | 0.36  | 0.018 | 0           | 20          | Sertoli_cells  | KIAA1210     |
| TBX2         | 0         | 1.080376078 | 0.497 | 0.027 | 0           | 18.40740741 | VSM_cells      | TBX2         |
| HDGFL1       | 0         | 1.080174314 | 0.973 | 0.428 | 0           | 2.273364486 | spermatocyte   | HDGFL1       |
| SPACA3       | 0         | 1.079896565 | 0.776 | 0.392 | 0           | 1.979591837 | spermatid      | SPACA3       |
| CD93         | 0         | 1.079894421 | 0.541 | 0.02  | 0           | 27.05       | endotheliocyte | CD93         |
| GRN1         | 5.57E-91  | 1.079813361 | 0.505 | 0.132 | 3.41E-86    | 3.83E+00    | macrophages    | GRN          |
| PKDCC        | 0         | 1.079063574 | 0.435 | 0.044 | 0           | 9.886363636 | Leydig_cells   | PKDCC        |
| CRIP1        | 0         | 1.078837251 | 0.524 | 0.014 | 0           | 37.42857143 | VSM_cells      | CRIP1        |
| ANXA2        | 4.03E-159 | 1.078539375 | 0.804 | 0.289 | 2.47E-154   | 2.78E+00    | endotheliocyte | ANXA2        |
| MS4A2        | 1.02E-90  | 1.078382808 | 0.18  | 0.004 | 6.24E-86    | 4.50E+01    | mastocyte      | MS4A2        |
| CCDC185      | 0         | 1.07798541  | 0.573 | 0.164 | 0           | 3.493902439 | spermatid      | CCDC185      |
| RNPS1        | 0         | 1.077603043 | 0.711 | 0.21  | 0           | 3.385714286 | spermatogonia  | RNPS1        |
| DAB21        | 7.00E-97  | 1.076804717 | 0.313 | 0.049 | 4.29E-92    | 6.39E+00    | macrophages    | DAB2         |
| MAP1B3       | 7.07E-241 | 1.076764263 | 0.416 | 0.146 | 4.34E-236   | 2.85E+00    | Sertoli_cells  | MAP1B        |
| SPARCL11     | 0         | 1.076576176 | 0.784 | 0.14  | 0           | 5.6         | Leydig_cells   | SPARCL1      |
| COL3A11      | 0         | 1.076415256 | 0.637 | 0.151 | 0           | 4.218543046 | PTM_cells      | COL3A1       |
| LMNA1        | 7.34E-34  | 1.076404098 | 0.582 | 0.37  | 4.50E-29    | 1.57E+00    | macrophages    | LMNA         |
| DNAJA4       | 0         | 1.075654541 | 0.775 | 0.451 | 0           | 1.718403548 | spermatid      | DNAJA4       |
| HSPA1A5      | 3.51E-19  | 1.074970248 | 0.369 | 0.363 | 2.15E-14    | 1.02E+00    | Sertoli_cells  | HSPA1A       |
| NUCKS11      | 1.36E-267 | 1.074297792 | 0.742 | 0.387 | 8.35E-263   | 1.92E+00    | Leydig_cells   | NUCKS1       |
| KLF6         | 1.68E-139 | 1.074170322 | 0.752 | 0.285 | 1.03E-134   | 2.64E+00    | endotheliocyte | KLF6         |
| MT-ND43      | 7.73E-266 | 1.073596272 | 0.788 | 0.4   | 4.74E-261   | 1.97E+00    | PTM_cells      | MT-ND4       |
| CEP170       | 0         | 1.073410956 | 0.731 | 0.423 | 0           | 1.728132388 | spermatid      | CEP170       |
| AURKA        | 0         | 1.07316644  | 0.757 | 0.173 | 0           | 4.375722543 | spermatocyte   | AURKA        |
| CRHBP        | 0         | 1.073064069 | 0.449 | 0.006 | 0           | 74.83333333 | endotheliocyte | CRHBP        |
| LINC01350    | 0         | 1.073018182 | 0.664 | 0.233 | 0           | 2.849785408 | spermatid      | LINC01350    |
| MT-ATP62     | 2.97E-88  | 1.072513754 | 0.61  | 0.427 | 1.82E-83    | 1.43E+00    | Leydig_cells   | MT-ATP6      |
| CAV12        | 0         | 1.072208093 | 0.671 | 0.077 | 0           | 8.714285714 | PTM_cells      | CAV1         |
| CSRP2        | 2.77E-111 | 1.072080235 | 0.63  | 0.279 | 1.70E-106   | 2.26E+00    | VSM_cells      | CSRP2        |

|          |           |             |       |       |           |              |                |          |
|----------|-----------|-------------|-------|-------|-----------|--------------|----------------|----------|
| ELF11    | 5.22E-96  | 1.071064385 | 0.458 | 0.108 | 3.20E-91  | 4.24E+00     | macrophages    | ELF1     |
| ADIRF    | 7.29E-223 | 1.070859829 | 0.645 | 0.124 | 4.47E-218 | 5.20E+00     | endotheliocyte | ADIRF    |
| C2orf88  | 0         | 1.070648098 | 0.72  | 0.449 | 0         | 1.603563474  | spermatid      | C2orf88  |
| PNRC14   | 1.60E-135 | 1.069628763 | 0.793 | 0.391 | 9.79E-131 | 2.03E+00     | VSM_cells      | PNRC1    |
| CH25H    | 0         | 1.069550119 | 0.209 | 0.005 | 0         | 41.8         | macrophages    | CH25H    |
| BTG1     | 1.20E-108 | 1.06954412  | 0.856 | 0.607 | 7.34E-104 | 1.41E+00     | endotheliocyte | BTG1     |
| GLRX2    | 0         | 1.068347906 | 0.709 | 0.299 | 0         | 2.371237458  | spermatid      | GLRX2    |
| FBXO25   | 0         | 1.068185589 | 0.984 | 0.514 | 0         | 1.914396887  | spermatocyte   | FBXO25   |
| PNRC1    | 1.66E-123 | 1.068027613 | 0.801 | 0.392 | 1.02E-118 | 2.04E+00     | endotheliocyte | PNRC1    |
| RPL182   | 1.10E-268 | 1.067955012 | 0.875 | 0.56  | 6.76E-264 | 1.56E+00     | Leydig_cells   | RPL18    |
| SMIM10   | 0         | 1.067626117 | 0.372 | 0.048 | 0         | 7.75         | Sertoli_cells  | SMIM10   |
| H2AFJ    | 0         | 1.067607145 | 0.996 | 0.767 | 0         | 1.298565841  | spermatocyte   | H2AFJ    |
| SFRP4    | 0         | 1.067575362 | 0.382 | 0.04  | 0         | 9.55         | Leydig_cells   | SFRP4    |
| IQGAP11  | 2.63E-64  | 1.067154355 | 0.492 | 0.17  | 1.61E-59  | 2.89E+00     | macrophages    | IQGAP1   |
| NDUFA4   | 4.82E-267 | 1.067132426 | 0.787 | 0.513 | 2.95E-262 | 1.53E+00     | PTM_cells      | NDUFA4   |
| ZPBP2    | 0         | 1.06633555  | 0.966 | 0.399 | 0         | 2.421052632  | spermatocyte   | ZPBP2    |
| PAGE2B   | 0         | 1.063196385 | 0.497 | 0.111 | 0         | 4.477477477  | spermatogonia  | PAGE2B   |
| TM4SF18  | 0         | 1.063035687 | 0.491 | 0.006 | 0         | 81.833333333 | endotheliocyte | TM4SF18  |
| CD4      | 6.77E-216 | 1.062656913 | 0.34  | 0.028 | 4.16E-211 | 1.21E+01     | macrophages    | CD4      |
| KANK21   | 0         | 1.061919045 | 0.591 | 0.053 | 0         | 11.1509434   | PTM_cells      | KANK2    |
| NOSTRIN  | 1.47E-111 | 1.061846603 | 0.591 | 0.224 | 9.02E-107 | 2.64E+00     | endotheliocyte | NOSTRIN  |
| TCF4     | 7.44E-127 | 1.061678617 | 0.749 | 0.328 | 4.56E-122 | 2.28E+00     | endotheliocyte | TCF4     |
| PTMA2    | 5.03E-90  | 1.061424259 | 0.953 | 0.653 | 3.08E-85  | 1.46E+00     | macrophages    | PTMA     |
| IZUMO4   | 0         | 1.061386838 | 0.991 | 0.669 | 0         | 1.481315396  | spermatocyte   | IZUMO4   |
| NPDC1    | 0         | 1.061356035 | 0.6   | 0.068 | 0         | 8.823529412  | endotheliocyte | NPDC1    |
| MT-ND16  | 1.18E-09  | 1.061143185 | 0.789 | 0.411 | 7.27E-05  | 1.92E+00     | T_cells        | MT-ND1   |
| LDLR     | 2.99E-286 | 1.060730166 | 0.524 | 0.066 | 1.83E-281 | 7.94E+00     | endotheliocyte | LDLR     |
| NRDC     | 0         | 1.060098263 | 0.814 | 0.495 | 0         | 1.644444444  | spermatid      | NRDC     |
| CD992    | 0         | 1.059604266 | 0.742 | 0.169 | 0         | 4.390532544  | PTM_cells      | CD99     |
| AHNAK3   | 0         | 1.059266749 | 0.696 | 0.145 | 0         | 4.8          | PTM_cells      | AHNAK    |
| PTCH11   | 0         | 1.059134645 | 0.601 | 0.175 | 0         | 3.434285714  | PTM_cells      | PTCH1    |
| C4orf48  | 1.55E-31  | 1.058981249 | 0.327 | 0.267 | 9.54E-27  | 1.22E+00     | Sertoli_cells  | C4orf48  |
| MEF2C2   | 2.58E-219 | 1.058432719 | 0.619 | 0.147 | 1.58E-214 | 4.21E+00     | VSM_cells      | MEF2C    |
| SPATA6   | 0         | 1.057958661 | 0.866 | 0.638 | 0         | 1.357366771  | spermatid      | SPATA6   |
| OGN1     | 0         | 1.057936178 | 0.607 | 0.052 | 0         | 11.67307692  | PTM_cells      | OGN      |
| TMEM130  | 0         | 1.057319313 | 0.331 | 0.018 | 0         | 18.38888889  | Sertoli_cells  | TMEM130  |
| HSP90AB1 | 0         | 1.057286621 | 0.899 | 0.669 | 0         | 1.343796712  | spermatogonia  | HSP90AB1 |
| LY6E1    | 0         | 1.057105587 | 0.562 | 0.1   | 0         | 5.62         | Leydig_cells   | LY6E     |
| APH1B    | 0         | 1.0569322   | 0.992 | 0.585 | 0         | 1.695726496  | spermatocyte   | APH1B    |
| EMCN     | 0         | 1.056736333 | 0.553 | 0.003 | 0         | 184.3333333  | endotheliocyte | EMCN     |
| SLC7A5   | 0         | 1.056590348 | 0.34  | 0.033 | 0         | 10.3030303   | Sertoli_cells  | SLC7A5   |
| CST32    | 0         | 1.056127669 | 0.859 | 0.41  | 0         | 2.095121951  | PTM_cells      | CST3     |
| MORF4L21 | 0         | 1.056018973 | 0.696 | 0.3   | 0         | 2.32         | PTM_cells      | MORF4L2  |
| DAZL     | 0         | 1.05592653  | 0.687 | 0.333 | 0         | 2.063063063  | spermatogonia  | DAZL     |
| RGCC     | 0         | 1.055846454 | 0.762 | 0.125 | 0         | 6.096        | spermatocyte   | RGCC     |
| FAM71E1  | 0         | 1.05581497  | 0.807 | 0.496 | 0         | 1.627016129  | spermatid      | FAM71E1  |
| A2M2     | 3.32E-307 | 1.055802396 | 0.634 | 0.105 | 2.04E-302 | 6.04E+00     | VSM_cells      | A2M      |
| PTRF2    | 0         | 1.055697097 | 0.671 | 0.092 | 0         | 7.293478261  | PTM_cells      | PTRF     |
| ENG      | 0         | 1.055516562 | 0.744 | 0.101 | 0         | 7.366336634  | endotheliocyte | ENG      |
| TMSB4X2  | 0         | 1.054390109 | 0.908 | 0.314 | 0         | 2.891719745  | Leydig_cells   | TMSB4X   |
| C9orf24  | 0         | 1.054342839 | 0.784 | 0.442 | 0         | 1.773755656  | spermatid      | C9orf24  |
| C1orf162 | 9.66E-91  | 1.05429294  | 0.418 | 0.096 | 5.92E-86  | 4.35E+00     | macrophages    | C1orf162 |
| RPL10A5  | 6.84E-11  | 1.054208494 | 0.868 | 0.663 | 4.20E-06  | 1.31E+00     | T_cells        | RPL10A   |
| RFPL3S   | 0         | 1.053985307 | 0.707 | 0.316 | 0         | 2.237341772  | spermatid      | RFPL3S   |
| GIMAP1   | 0         | 1.053501648 | 0.551 | 0.002 | 0         | 275.5        | endotheliocyte | GIMAP1   |
| ASRGL1   | 0         | 1.053407162 | 0.96  | 0.482 | 0         | 1.991701245  | spermatocyte   | ASRGL1   |
| CCIN     | 0         | 1.053195229 | 0.671 | 0.3   | 0         | 2.236666667  | spermatid      | CCIN     |
| MYADM1   | 1.27E-212 | 1.052694682 | 0.546 | 0.21  | 7.81E-208 | 2.60E+00     | Leydig_cells   | MYADM    |
| RPS4X5   | 0         | 1.05213984  | 0.81  | 0.318 | 0         | 2.547169811  | Sertoli_cells  | RPS4X    |
| ZFAS1    | 9.08E-129 | 1.051917456 | 0.692 | 0.262 | 5.57E-124 | 2.64E+00     | endotheliocyte | ZFAS1    |
| RPL27A4  | 6.42E-123 | 1.051687049 | 0.89  | 0.785 | 3.94E-118 | 1.13E+00     | VSM_cells      | RPL27A   |
| PRH1     | 0         | 1.051672237 | 0.672 | 0.263 | 0         | 2.55513308   | spermatid      | PRH1     |
| SOX18    | 1.72E-120 | 1.051657828 | 0.524 | 0.155 | 1.06E-115 | 3.38E+00     | endotheliocyte | SOX18    |
| NDRG2    | 0         | 1.050426519 | 0.497 | 0.063 | 0         | 7.888888889  | Leydig_cells   | NDRG2    |
| FAM205C  | 0         | 1.050278917 | 0.601 | 0.113 | 0         | 5.318584071  | spermatid      | FAM205C  |
| CHMP1B   | 4.13E-21  | 1.049897432 | 0.391 | 0.224 | 2.53E-16  | 1.75E+00     | macrophages    | CHMP1B   |
| TMEM210  | 0         | 1.049457505 | 0.678 | 0.292 | 0         | 2.321917808  | spermatid      | TMEM210  |
| MSRB31   | 0         | 1.049305378 | 0.571 | 0.073 | 0         | 7.821917808  | VSM_cells      | MSRB3    |
| DUSP51   | 5.01E-74  | 1.04882617  | 0.38  | 0.091 | 3.07E-69  | 4.18E+00     | macrophages    | DUSP5    |
| KCTD122  | 0         | 1.048578006 | 0.51  | 0.071 | 0         | 7.183098592  | Leydig_cells   | KCTD12   |
| G2E3     | 0         | 1.048216538 | 0.66  | 0.373 | 0         | 1.769436997  | spermatid      | G2E3     |
| ITM2B    | 4.16E-164 | 1.048151145 | 0.873 | 0.319 | 2.55E-159 | 2.74E+00     | endotheliocyte | ITM2B    |
| SPATA19  | 0         | 1.047736381 | 0.727 | 0.34  | 0         | 2.138235294  | spermatid      | SPATA19  |
| TMEM190  | 0         | 1.047224605 | 0.491 | 0.206 | 0         | 2.383495146  | spermatid      | TMEM190  |
| FBLN2    | 0         | 1.047158475 | 0.504 | 0.071 | 0         | 7.098591549  | Leydig_cells   | FBLN2    |

|           |           |             |       |       |             |             |                |          |
|-----------|-----------|-------------|-------|-------|-------------|-------------|----------------|----------|
| RPL30     | 2.76E-147 | 1.047128415 | 0.973 | 0.877 | 1.70E-142   | 1.11E+00    | endotheliocyte | RPL30    |
| DUT       | 0         | 1.046954035 | 0.715 | 0.355 | 0           | 2.014084507 | spermatogonia  | DUT      |
| LYN       | 0         | 1.046890537 | 0.367 | 0.021 | 0           | 17.47619048 | macrophages    | LYN      |
| LMNA2     | 2.60E-267 | 1.046743052 | 0.726 | 0.357 | 1.60E-262   | 2.03E+00    | Leydig_cells   | LMNA     |
| RHOBTB3   | 0         | 1.046622568 | 0.575 | 0.121 | 0           | 4.752066116 | Leydig_cells   | RHOBTB3  |
| CX3CR1    | 0         | 1.046613869 | 0.323 | 0.004 | 0           | 80.75       | macrophages    | CX3CR1   |
| C11orf71  | 0         | 1.046552538 | 0.835 | 0.614 | 0           | 1.359934853 | spermatid      | C11orf71 |
| DAB22     | 0         | 1.04620679  | 0.492 | 0.033 | 0           | 14.90909091 | Leydig_cells   | DAB2     |
| TPT12     | 0         | 1.045331013 | 0.975 | 0.854 | 0           | 1.141686183 | Leydig_cells   | TPT1     |
| CYR612    | 5.39E-237 | 1.044637345 | 0.588 | 0.109 | 3.31E-232   | 5.39E+00    | VSM_cells      | CYR61    |
| RPS27A4   | 2.36E-131 | 1.044309363 | 0.926 | 0.86  | 1.45E-126   | 1.08E+00    | VSM_cells      | RPS27A   |
| GAMT1     | 0         | 1.043945392 | 0.387 | 0.091 | 0           | 4.252747253 | Sertoli_cells  | GAMT     |
| MYL64     | 8.73E-306 | 1.043650028 | 0.802 | 0.656 | 5.35E-301   | 1.22E+00    | Sertoli_cells  | MYL6     |
| IL7R      | 1.60E-69  | 1.043591784 | 0.237 | 0.006 | 9.84E-65    | 3.95E+01    | T_cells        | IL7R     |
| RPS155    | 3.56E-10  | 1.043189129 | 0.895 | 0.766 | 2.18E-05    | 1.17E+00    | T_cells        | RPS15    |
| LGALS3BP1 | 0         | 1.042971349 | 0.663 | 0.091 | 0           | 7.285714286 | PTM_cells      | LGALS3BP |
| KCTD121   | 4.53E-119 | 1.04279207  | 0.455 | 0.085 | 2.78E-114   | 5.35E+00    | macrophages    | KCTD12   |
| RNASE6    | 0         | 1.042400322 | 0.327 | 0.001 | 0           | 327         | macrophages    | RNASE6   |
| FXVD61    | 0         | 1.04226348  | 0.647 | 0.087 | 0           | 7.436781609 | PTM_cells      | FXVD6    |
| BTG23     | 0         | 1.042177003 | 0.581 | 0.11  | 0           | 5.281818182 | PTM_cells      | BTG2     |
| ARX       | 0         | 1.042068175 | 0.451 | 0.032 | 0           | 14.09375    | Leydig_cells   | ARX      |
| FN12      | 1.91E-195 | 1.041741419 | 0.457 | 0.079 | 1.17E-190   | 5.78E+00    | VSM_cells      | FN1      |
| ERICH2    | 0         | 1.041688401 | 0.772 | 0.527 | 0           | 1.464895636 | spermatid      | ERICH2   |
| FOXC12    | 0         | 1.041595094 | 0.531 | 0.065 | 0           | 8.169230769 | VSM_cells      | FOXC1    |
| C5orf47   | 0         | 1.041277528 | 0.631 | 0.331 | 0           | 1.906344411 | spermatogonia  | C5orf47  |
| ENG1      | 0         | 1.04088765  | 0.636 | 0.087 | 0           | 7.310344828 | Leydig_cells   | ENG      |
| RPL13A4   | 7.58E-118 | 1.040514976 | 0.892 | 0.735 | 4.65E-113   | 1.21E+00    | VSM_cells      | RPL13A   |
| TMCO2     | 0         | 1.040163302 | 0.815 | 0.489 | 0           | 1.666666667 | spermatid      | TMCO2    |
| FAM107A   | 1.24E-249 | 1.039817456 | 0.402 | 0.044 | 7.62E-245   | 9.14E+00    | endotheliocyte | FAM107A  |
| KLF23     | 0         | 1.039536757 | 0.622 | 0.145 | 0           | 4.289655172 | PTM_cells      | KLF2     |
| LMNA4     | 7.94E-132 | 1.038897531 | 0.757 | 0.365 | 4.87E-127   | 2.07E+00    | VSM_cells      | LMNA     |
| REEP1     | 2.75E-267 | 1.03873483  | 0.362 | 0.107 | 1.69E-262   | 3.38E+00    | Sertoli_cells  | REEP1    |
| CLEC3B    | 0         | 1.038076697 | 0.485 | 0.085 | 0           | 5.705882353 | Leydig_cells   | CLEC3B   |
| PLPP31    | 0         | 1.037803952 | 0.671 | 0.095 | 0           | 7.063157895 | PTM_cells      | PLPP3    |
| KIF9      | 0         | 1.037800678 | 0.969 | 0.428 | 0           | 2.264018692 | spermatocyte   | KIF9     |
| NKAPL     | 0         | 1.037505588 | 0.946 | 0.301 | 0           | 3.142857143 | spermatocyte   | NKAPL    |
| RPS85     | 3.63E-10  | 1.037475108 | 0.868 | 0.776 | 2.23E-05    | 1.12E+00    | T_cells        | RPS8     |
| C7orf55   | 0         | 1.037277911 | 0.948 | 0.362 | 0           | 2.61878453  | spermatocyte   | C7orf55  |
| RGS101    | 1.04E-23  | 1.037099479 | 0.316 | 0.033 | 6.41E-19    | 9.58E+00    | T_cells        | RGS10    |
| COTL1     | 9.74E-88  | 1.036862638 | 0.387 | 0.083 | 5.97E-83    | 4.66E+00    | macrophages    | COTL1    |
| PTMA      | 0         | 1.036705059 | 0.916 | 0.585 | 0           | 1.565811966 | spermatogonia  | PTMA     |
| PDLIM11   | 0         | 1.036461201 | 0.596 | 0.09  | 0           | 6.622222222 | VSM_cells      | PDLIM1   |
| NFKBIA2   | 0         | 1.036400864 | 0.676 | 0.194 | 0           | 3.484536082 | Leydig_cells   | NFKBIA   |
| IFI63     | 0         | 1.036257666 | 0.609 | 0.071 | 0           | 8.577464789 | PTM_cells      | IFI6     |
| S100A42   | 8.23E-117 | 1.036205269 | 0.288 | 0.05  | 5.05E-112   | 5.76E+00    | VSM_cells      | S100A4   |
| FRZB      | 0         | 1.035877879 | 0.516 | 0.025 | 0           | 20.64       | VSM_cells      | FRZB     |
| PEBP11    | 1.97E-275 | 1.035576138 | 0.767 | 0.595 | 1.21E-270   | 1.29E+00    | Sertoli_cells  | PEBP1    |
| GATM1     | 2.60E-278 | 1.035510004 | 0.377 | 0.112 | 1.59E-273   | 3.37E+00    | Sertoli_cells  | GATM     |
| CD812     | 0         | 1.035122196 | 0.706 | 0.298 | 0           | 2.369127517 | PTM_cells      | CD81     |
| PPIB      | 9.65E-237 | 1.035017928 | 0.627 | 0.279 | 5.92E-232   | 2.25E+00    | Leydig_cells   | PPIB     |
| SRSF9     | 0         | 1.034963692 | 0.714 | 0.345 | 0           | 2.069565217 | spermatogonia  | SRSF9    |
| MORN3     | 0         | 1.034700594 | 0.653 | 0.196 | 0           | 3.331632653 | spermatid      | MORN3    |
| FXVD5     | 0         | 1.034307693 | 0.536 | 0.018 | 0           | 29.77777778 | endotheliocyte | FXVD5    |
| MT-CYB2   | 3.40E-101 | 1.034136896 | 0.608 | 0.389 | 2.09E-96    | 1.56E+00    | Leydig_cells   | MT-CYB   |
| MT.ND31   | 4.14E-30  | 1.033896358 | 0.576 | 0.368 | 2.54E-25    | 1.57E+00    | macrophages    | MT.ND3   |
| RPS15     | 3.39E-114 | 1.033851216 | 0.923 | 0.764 | 2.08E-109   | 1.21E+00    | endotheliocyte | RPS15    |
| CABYR     | 0         | 1.033688586 | 0.897 | 0.652 | 0           | 1.375766871 | spermatid      | CABYR    |
| MT.ND21   | 2.40E-27  | 1.033648193 | 0.572 | 0.383 | 1.47E-22    | 1.49E+00    | macrophages    | MT.ND2   |
| MSN       | 0         | 1.03352218  | 0.581 | 0.063 | 0           | 9.222222222 | endotheliocyte | MSN      |
| CD441     | 1.38E-209 | 1.033103464 | 0.49  | 0.092 | 8.49E-205   | 5.33E+00    | VSM_cells      | CD44     |
| PPP1R15A4 | 1.05E-191 | 1.033017617 | 0.702 | 0.188 | 6.46E-187   | 3.73E+00    | VSM_cells      | PPP1R15A |
| ATF3      | 2.91E-216 | 1.032860886 | 0.615 | 0.112 | 1.79E-211   | 5.49E+00    | endotheliocyte | ATF3     |
| PAQR7     | 0         | 1.032503837 | 0.675 | 0.261 | 0           | 2.586206897 | spermatid      | PAQR7    |
| RPS164    | 2.64E-126 | 1.032377    | 0.899 | 0.755 | 1.62E-121   | 1.19E+00    | VSM_cells      | RPS16    |
| PSMB8     | 0         | 1.032128952 | 0.6   | 0.029 | 0           | 20.68965517 | endotheliocyte | PSMB8    |
| PDIA3     | 0         | 1.031738156 | 0.771 | 0.354 | 0           | 2.177966102 | spermatogonia  | PDIA3    |
| PRDX21    | 0         | 1.031716599 | 0.585 | 0.09  | 0           | 6.5         | Leydig_cells   | PRDX2    |
| NUCKS12   | 8.03E-301 | 1.031307733 | 0.741 | 0.385 | 4.93E-296   | 1.92E+00    | PTM_cells      | NUCKS1   |
| EMP11     | 0         | 1.030902574 | 0.436 | 0.045 | 0           | 9.688888889 | Leydig_cells   | EMP1     |
| HMGCS2    | 0         | 1.030449538 | 0.338 | 0.015 | 0           | 22.53333333 | Sertoli_cells  | HMGCS2   |
| MS4A14    | 0         | 1.030389573 | 0.687 | 0.311 | 0           | 2.209003215 | spermatid      | MS4A14   |
| AP1S2     | 2.26E-279 | 1.030190651 | 0.618 | 0.095 | 1.39E-274   | 6.51E+00    | endotheliocyte | AP1S2    |
| RPL414    | 8.02E-129 | 1.030022165 | 0.915 | 0.785 | 4.92E-124   | 1.17E+00    | VSM_cells      | RPL41    |
| GLIPR11   | 2.73E-05  | 1.029972478 | 0.316 | 0.125 | 1           | 2.528       | T_cells        | GLIPR1   |
| ARL6IP55  | 2.30E-08  | 1.029876999 | 0.5   | 0.205 | 0.001409505 | 2.43902439  | T_cells        | ARL6IP5  |

|               |             |             |       |       |             |             |                |               |
|---------------|-------------|-------------|-------|-------|-------------|-------------|----------------|---------------|
| COTL11        | 1.35E-09    | 1.029777235 | 0.342 | 0.086 | 8.28E-05    | 3.98E+00    | T_cells        | COTL1         |
| LGALS3        | 1.88E-190   | 1.02952398  | 0.754 | 0.201 | 1.15E-185   | 3.75E+00    | endotheliocyte | LGALS3        |
| LEPROTL1      | 0.004685222 | 1.028536319 | 0.5   | 0.435 | 1           | 1.149425287 | T_cells        | LEPROTL1      |
| FAM81B        | 0           | 1.027835823 | 0.795 | 0.416 | 0           | 1.911057692 | spermatid      | FAM81B        |
| TEX26         | 0           | 1.027535738 | 0.697 | 0.337 | 0           | 2.068249258 | spermatid      | TEX26         |
| CALM14        | 1.30E-06    | 1.026986507 | 0.737 | 0.693 | 0.079618984 | 1.063492063 | T_cells        | CALM1         |
| RPS3A         | 8.20E-154   | 1.026736208 | 0.98  | 0.897 | 5.03E-149   | 1.09E+00    | endotheliocyte | RPS3A         |
| VCX2          | 0           | 1.026229305 | 0.433 | 0.147 | 0           | 2.945578231 | spermatogonia  | VCX2          |
| DSTN          | 0           | 1.026075228 | 0.84  | 0.547 | 0           | 1.535648995 | PTM_cells      | DSTN          |
| BTG3          | 0           | 1.025921253 | 0.638 | 0.108 | 0           | 5.907407407 | spermatogonia  | BTG3          |
| C1orf56       | 0           | 1.025873417 | 0.976 | 0.401 | 0           | 2.433915212 | spermatocyte   | C1orf56       |
| RPL194        | 3.15E-11    | 1.025814503 | 0.921 | 0.839 | 1.93E-06    | 1.10E+00    | T_cells        | RPL19         |
| ADGRE51       | 2.01E-34    | 1.024978124 | 0.316 | 0.023 | 1.23E-29    | 1.37E+01    | T_cells        | ADGRE5        |
| ADGRL4        | 1.39E-162   | 1.02468763  | 0.625 | 0.181 | 8.51E-158   | 3.45E+00    | endotheliocyte | ADGRL4        |
| MTND1P23      | 1.39E-65    | 1.024623659 | 0.391 | 0.369 | 8.54E-61    | 1.06E+00    | spermatogonia  | MTND1P23      |
| DDX24         | 0           | 1.024475448 | 0.871 | 0.566 | 0           | 1.538869258 | spermatogonia  | DDX24         |
| HLA-A2        | 4.62E-139   | 1.023656583 | 0.548 | 0.298 | 2.83E-134   | 1.84E+00    | Leydig_cells   | HLA-A         |
| UTRN1         | 3.26E-123   | 1.023377845 | 0.759 | 0.364 | 2.00E-118   | 2.09E+00    | VSM_cells      | UTRN          |
| MT-CO34       | 1.02E-09    | 1.023247521 | 0.816 | 0.47  | 6.25E-05    | 1.74E+00    | T_cells        | MT-CO3        |
| BHLHE41       | 1.57E-98    | 1.022881543 | 0.269 | 0.037 | 9.65E-94    | 7.27E+00    | macrophages    | BHLHE41       |
| RPS261        | 6.14E-69    | 1.022765567 | 0.744 | 0.535 | 3.77E-64    | 1.39E+00    | endotheliocyte | RPS26         |
| CCT8          | 0           | 1.022678037 | 0.716 | 0.245 | 0           | 2.92244898  | spermatogonia  | CCT8          |
| RPL24         | 2.87E-112   | 1.022623662 | 0.908 | 0.741 | 1.76E-107   | 1.23E+00    | endotheliocyte | RPL24         |
| STAB1         | 5.77E-255   | 1.022603988 | 0.273 | 0.015 | 3.54E-250   | 1.82E+01    | macrophages    | STAB1         |
| CD994         | 7.65E-229   | 1.022499757 | 0.468 | 0.178 | 4.69E-224   | 2.63E+00    | Sertoli_cells  | CD99          |
| LSP12         | 2.47E-33    | 1.022479894 | 0.368 | 0.031 | 1.52E-28    | 1.19E+01    | T_cells        | LSP1          |
| NPTX2         | 0           | 1.022276962 | 0.564 | 0.109 | 0           | 5.174311927 | PTM_cells      | NPTX2         |
| RPL34P181     | 3.53E-31    | 1.022001268 | 0.421 | 0.205 | 2.17E-26    | 2.05E+00    | macrophages    | RPL34P18      |
| TSPYL2        | 2.24E-187   | 1.021694125 | 0.458 | 0.211 | 1.38E-182   | 2.17E+00    | Sertoli_cells  | TSPYL2        |
| AKAP3         | 0           | 1.021670657 | 0.756 | 0.517 | 0           | 1.462282398 | spermatid      | AKAP3         |
| FGFR11        | 0           | 1.021635475 | 0.538 | 0.118 | 0           | 4.559322034 | Leydig_cells   | FGFR1         |
| INHA          | 0           | 1.021314718 | 0.329 | 0.012 | 0           | 27.41666667 | Sertoli_cells  | INHA          |
| CCDC85B3      | 0           | 1.020638822 | 0.405 | 0.106 | 0           | 3.820754717 | Sertoli_cells  | CCDC85B       |
| PPP1R12A      | 7.02E-104   | 1.020585394 | 0.759 | 0.474 | 4.31E-99    | 1.60E+00    | VSM_cells      | PPP1R12A      |
| PSMB9         | 0           | 1.020254656 | 0.573 | 0.03  | 0           | 19.1        | endotheliocyte | PSMB9         |
| HCLS11        | 5.37E-92    | 1.020180489 | 0.395 | 0.013 | 3.30E-87    | 3.04E+01    | T_cells        | HCLS1         |
| RPL10P3       | 3.41E-46    | 1.020006728 | 0.211 | 0.053 | 2.09E-41    | 3.98E+00    | endotheliocyte | RPL10P3       |
| PPP1R14A1     | 0           | 1.019924142 | 0.634 | 0.127 | 0           | 4.992125984 | PTM_cells      | PPP1R14A      |
| RPLP12        | 0           | 1.019549611 | 0.966 | 0.758 | 0           | 1.274406332 | Leydig_cells   | RPLP1         |
| TEX40         | 0           | 1.018955035 | 0.581 | 0.515 | 0           | 1.12815534  | spermatocyte   | TEX40         |
| RPL32         | 2.77E-126   | 1.01894042  | 0.975 | 0.888 | 1.70E-121   | 1.10E+00    | endotheliocyte | RPL32         |
| TMIGD3        | 0           | 1.018641516 | 0.903 | 0.267 | 0           | 3.382022472 | spermatocyte   | TMIGD3        |
| RPS165        | 1.52E-09    | 1.0174571   | 0.842 | 0.757 | 9.34E-05    | 1.11E+00    | T_cells        | RPS16         |
| FTH1P20       | 2.68E-96    | 1.017249901 | 0.276 | 0.04  | 1.64E-91    | 6.90E+00    | macrophages    | FTH1P20       |
| RPS15A        | 3.50E-114   | 1.017035504 | 0.931 | 0.784 | 2.15E-109   | 1.19E+00    | endotheliocyte | RPS15A        |
| LY6E3         | 1.92E-07    | 1.0165921   | 0.368 | 0.119 | 0.011757004 | 3.092436975 | T_cells        | LY6E          |
| MIDN          | 1.95E-153   | 1.01627105  | 0.66  | 0.192 | 1.20E-148   | 3.44E+00    | endotheliocyte | MIDN          |
| TUBA1A5       | 7.71E-293   | 1.016199836 | 0.512 | 0.183 | 4.73E-288   | 2.80E+00    | Sertoli_cells  | TUBA1A        |
| RPLP21        | 5.45E-10    | 1.016155388 | 0.947 | 0.835 | 3.34E-05    | 1.13E+00    | T_cells        | RPLP2         |
| PSMF1         | 0           | 1.015951532 | 0.837 | 0.676 | 0           | 1.23816568  | spermatid      | PSMF1         |
| CYR1          | 0           | 1.015893623 | 0.558 | 0.004 | 0           | 139.5       | endotheliocyte | CYR1          |
| UBA2          | 0           | 1.015870229 | 0.745 | 0.326 | 0           | 2.285276074 | spermatogonia  | UBA2          |
| S100A161      | 0           | 1.015636066 | 0.343 | 0.049 | 0           | 7           | Sertoli_cells  | S100A16       |
| SPESP1        | 0           | 1.015116922 | 0.966 | 0.397 | 0           | 2.43324937  | spermatocyte   | SPESP1        |
| BPIFA3        | 0           | 1.014622394 | 0.739 | 0.342 | 0           | 2.160818713 | spermatid      | BPIFA3        |
| DNAJC5B       | 0           | 1.01451615  | 0.763 | 0.376 | 0           | 2.029255319 | spermatid      | DNAJC5B       |
| ADAMTS1       | 4.25E-192   | 1.014250233 | 0.506 | 0.085 | 2.61E-187   | 5.95E+00    | endotheliocyte | ADAMTS1       |
| PDLIM31       | 0           | 1.014196211 | 0.564 | 0.05  | 0           | 11.28       | VSM_cells      | PDLIM3        |
| MT-ND32       | 2.02E-108   | 1.014141965 | 0.601 | 0.365 | 1.24E-103   | 1.65E+00    | Leydig_cells   | MT-ND3        |
| RPN2          | 0           | 1.014072835 | 0.746 | 0.399 | 0           | 1.869674185 | spermatogonia  | RPN2          |
| SMIM6         | 0           | 1.013627189 | 0.648 | 0.225 | 0           | 2.88        | spermatid      | SMIM6         |
| CCNL13        | 4.77E-201   | 1.013492155 | 0.627 | 0.333 | 2.92E-196   | 1.88E+00    | PTM_cells      | CCNL1         |
| CCNY          | 0           | 1.013412591 | 0.792 | 0.549 | 0           | 1.442622951 | spermatid      | CCNY          |
| ODF2          | 0           | 1.013253795 | 0.921 | 0.774 | 0           | 1.189922481 | spermatid      | ODF2          |
| RAMP1         | 0           | 1.013053663 | 0.469 | 0.019 | 0           | 24.68421053 | VSM_cells      | RAMP1         |
| PPP1R15A3     | 0           | 1.012865435 | 0.674 | 0.173 | 0           | 3.895953757 | PTM_cells      | PPP1R15A      |
| BEX4          | 0           | 1.012726271 | 0.368 | 0.083 | 0           | 4.43373494  | Sertoli_cells  | BEX4          |
| LHFP          | 5.36E-242   | 1.012497173 | 0.547 | 0.202 | 3.29E-237   | 2.71E+00    | Leydig_cells   | LHFP          |
| HNRNPA3       | 0           | 1.012438855 | 0.804 | 0.495 | 0           | 1.624242424 | spermatogonia  | HNRNPA3       |
| LCK           | 1.85E-85    | 1.01233322  | 0.289 | 0.008 | 1.13E-80    | 3.61E+01    | T_cells        | LCK           |
| TSPAN7        | 0           | 1.012181941 | 0.531 | 0.007 | 0           | 75.85714286 | endotheliocyte | TSPAN7        |
| RPL243        | 1.70E-114   | 1.01116579  | 0.884 | 0.741 | 1.04E-109   | 1.19E+00    | VSM_cells      | RPL24         |
| FAM229A       | 0           | 1.010992348 | 0.769 | 0.506 | 0           | 1.519762846 | spermatid      | FAM229A       |
| RP11.475C16.1 | 9.68E-28    | 1.010966217 | 0.384 | 0.186 | 5.94E-23    | 2.06E+00    | macrophages    | RP11.475C16.1 |
| NBL11         | 0           | 1.010804278 | 0.622 | 0.073 | 0           | 8.520547945 | PTM_cells      | NBL1          |

|            |           |             |       |       |           |             |                |            |
|------------|-----------|-------------|-------|-------|-----------|-------------|----------------|------------|
| C10orf54   | 8.50E-269 | 1.010034347 | 0.337 | 0.021 | 5.22E-264 | 1.60E+01    | macrophages    | C10orf54   |
| MT.CYB3    | 3.13E-15  | 1.009184391 | 0.348 | 0.334 | 1.92E-10  | 1.04E+00    | Sertoli_cells  | MT.CYB     |
| CLSPN      | 0         | 1.008966061 | 0.372 | 0.06  | 0         | 6.2         | spermatogonia  | CLSPN      |
| CAV11      | 0         | 1.008787582 | 0.601 | 0.084 | 0         | 7.154761905 | Leydig_cells   | CAV1       |
| PTPRE      | 0         | 1.008611499 | 0.354 | 0.018 | 0         | 19.66666667 | macrophages    | PTPRE      |
| GADD45G    | 0         | 1.008432318 | 0.429 | 0.064 | 0         | 6.703125    | Leydig_cells   | GADD45G    |
| LEPROT1    | 0         | 1.008343201 | 0.574 | 0.156 | 0         | 3.679487179 | Leydig_cells   | LEPROT     |
| RPL22      | 6.06E-113 | 1.008194445 | 0.881 | 0.645 | 3.72E-108 | 1.37E+00    | endotheliocyte | RPL22      |
| GNB2L12    | 1.73E-214 | 1.007792381 | 0.712 | 0.459 | 1.06E-209 | 1.55E+00    | PTM_cells      | GNB2L1     |
| RCN2       | 0         | 1.007554328 | 0.655 | 0.319 | 0         | 2.053291536 | spermatogonia  | RCN2       |
| CENPH      | 0         | 1.007126089 | 0.602 | 0.15  | 0         | 4.013333333 | spermatogonia  | CENPH      |
| ATPIF1     | 0         | 1.006656181 | 0.993 | 0.69  | 0         | 1.439130435 | spermatocyte   | ATPIF1     |
| CPE2       | 7.54E-201 | 1.006625468 | 0.736 | 0.205 | 4.62E-196 | 3.59E+00    | VSM_cells      | CPE        |
| NTRK21     | 0         | 1.005608146 | 0.531 | 0.027 | 0         | 19.66666667 | VSM_cells      | NTRK2      |
| LAMB11     | 0         | 1.005567139 | 0.536 | 0.065 | 0         | 8.246153846 | PTM_cells      | LAMB1      |
| RNF133     | 0         | 1.005438836 | 0.663 | 0.198 | 0         | 3.348484848 | spermatid      | RNF133     |
| LDHB1      | 0         | 1.005334421 | 0.688 | 0.198 | 0         | 3.474747475 | PTM_cells      | LDHB       |
| EHD1       | 0         | 1.004966188 | 0.8   | 0.549 | 0         | 1.4571949   | spermatid      | EHD1       |
| POSTN      | 0         | 1.004912143 | 0.342 | 0.003 | 0         | 114         | endotheliocyte | POSTN      |
| CCDC31     | 0         | 1.004779736 | 0.567 | 0.04  | 0         | 14.175      | VSM_cells      | CCDC3      |
| NRK        | 0         | 1.004504364 | 0.415 | 0.016 | 0         | 25.9375     | Leydig_cells   | NRK        |
| LCA5L      | 0         | 1.004122475 | 0.992 | 0.571 | 0         | 1.737302977 | spermatocyte   | LCA5L      |
| HSPA1A     | 1.20E-103 | 1.004122044 | 0.762 | 0.357 | 7.36E-99  | 2.13E+00    | endotheliocyte | HSPA1A     |
| CCDC83     | 0         | 1.003772754 | 0.925 | 0.289 | 0         | 3.200692042 | spermatocyte   | CCDC83     |
| IL33       | 0         | 1.003027906 | 0.514 | 0.016 | 0         | 32.125      | endotheliocyte | IL33       |
| FBXO39     | 0         | 1.002765128 | 0.601 | 0.151 | 0         | 3.98013245  | spermatid      | FBXO39     |
| PRSS50     | 0         | 1.002496585 | 0.444 | 0.097 | 0         | 4.577319588 | spermatogonia  | PRSS50     |
| RPL213     | 4.73E-299 | 1.002446263 | 0.905 | 0.459 | 2.90E-294 | 1.97E+00    | Leydig_cells   | RPL21      |
| COPRS      | 0         | 1.002381556 | 0.983 | 0.61  | 0         | 1.61147541  | spermatocyte   | COPRS      |
| MRO        | 0         | 1.002312532 | 0.336 | 0.011 | 0         | 30.54545455 | Sertoli_cells  | MRO        |
| MT-ND36    | 4.47E-10  | 1.002094498 | 0.789 | 0.375 | 2.74E-05  | 2.10E+00    | T_cells        | MT-ND3     |
| IL10RA     | 0         | 1.001586335 | 0.35  | 0.002 | 0         | 175         | macrophages    | IL10RA     |
| TACC1      | 2.95E-147 | 1.001437169 | 0.67  | 0.204 | 1.81E-142 | 3.28E+00    | endotheliocyte | TACC1      |
| SMOC1      | 0         | 1.00085494  | 0.543 | 0.057 | 0         | 9.526315789 | PTM_cells      | SMOC1      |
| RNASE1     | 1.92E-286 | 1.000831211 | 0.752 | 0.133 | 1.18E-281 | 5.65E+00    | endotheliocyte | RNASE1     |
| RPL19      | 1.86E-126 | 1.000741153 | 0.978 | 0.837 | 1.14E-121 | 1.17E+00    | endotheliocyte | RPL19      |
| C12orf572  | 1.20E-108 | 0.999807648 | 0.757 | 0.454 | 7.39E-104 | 1.67E+00    | VSM_cells      | C12orf57   |
| SLC3A2     | 1.26E-168 | 0.99920524  | 0.633 | 0.162 | 7.75E-164 | 3.91E+00    | endotheliocyte | SLC3A2     |
| NRP2       | 3.08E-199 | 0.999084569 | 0.409 | 0.059 | 1.89E-194 | 6.93E+00    | endotheliocyte | NRP2       |
| BANF1      | 0         | 0.999078458 | 0.773 | 0.348 | 0         | 2.221264368 | spermatogonia  | BANF1      |
| CTSZ1      | 5.60E-132 | 0.999044538 | 0.38  | 0.057 | 3.44E-127 | 6.67E+00    | macrophages    | CTSZ       |
| FAM120B    | 0         | 0.998432274 | 0.68  | 0.324 | 0         | 2.098765432 | spermatid      | FAM120B    |
| ARRB2      | 1.30E-303 | 0.998356315 | 0.36  | 0.022 | 7.98E-299 | 1.64E+01    | macrophages    | ARRB2      |
| SH3BGRL31  | 1.83E-28  | 0.997807163 | 0.414 | 0.212 | 1.12E-23  | 1.95E+00    | macrophages    | SH3BGRL3   |
| PDHA2      | 0         | 0.99780464  | 0.975 | 0.41  | 0         | 2.37804878  | spermatocyte   | PDHA2      |
| CSNK1G2    | 0         | 0.997613988 | 0.762 | 0.437 | 0         | 1.743707094 | spermatid      | CSNK1G2    |
| OBSL1      | 0         | 0.996643674 | 0.979 | 0.591 | 0         | 1.656514382 | spermatocyte   | OBSL1      |
| ZYX        | 3.88E-72  | 0.99651764  | 0.37  | 0.087 | 2.38E-67  | 4.25E+00    | macrophages    | ZYX        |
| WBSCR28    | 0         | 0.996420735 | 0.678 | 0.322 | 0         | 2.105590062 | spermatid      | WBSCR28    |
| LCP11      | 1.65E-50  | 0.99640299  | 0.586 | 0.286 | 1.01E-45  | 2.05E+00    | macrophages    | LCP1       |
| MT-ND33    | 3.45E-262 | 0.996301609 | 0.768 | 0.355 | 2.12E-257 | 2.16E+00    | PTM_cells      | MT-ND3     |
| B4GALT1    | 2.44E-37  | 0.995936026 | 0.424 | 0.184 | 1.50E-32  | 2.30E+00    | macrophages    | B4GALT1    |
| PFN11      | 3.19E-37  | 0.995862579 | 0.626 | 0.407 | 1.96E-32  | 1.54E+00    | macrophages    | PFN1       |
| KLF4       | 1.22E-96  | 0.995509086 | 0.801 | 0.483 | 7.50E-92  | 1.66E+00    | endotheliocyte | KLF4       |
| RPS2110    | 2.03E-10  | 0.995265504 | 0.816 | 0.525 | 1.25E-05  | 1.55E+00    | T_cells        | RPS21      |
| MEX3C      | 0         | 0.995217122 | 0.713 | 0.375 | 0         | 1.901333333 | spermatid      | MEX3C      |
| KIF5C      | 0         | 0.995071945 | 0.658 | 0.257 | 0         | 2.560311284 | spermatid      | KIF5C      |
| PRSS21     | 0         | 0.994298838 | 0.637 | 0.444 | 0         | 1.434684685 | spermatogonia  | PRSS21     |
| C10orf10   | 1.84E-161 | 0.994112717 | 0.318 | 0.04  | 1.13E-156 | 7.95E+00    | endotheliocyte | C10orf10   |
| CEP170P1   | 0         | 0.99407853  | 0.333 | 0.043 | 0         | 7.744186047 | spermatid      | CEP170P1   |
| TCEAL6     | 0         | 0.994013183 | 0.299 | 0.01  | 0         | 29.9        | Sertoli_cells  | TCEAL6     |
| RPL62      | 3.94E-231 | 0.993840983 | 0.852 | 0.677 | 2.41E-226 | 1.26E+00    | Leydig_cells   | RPL6       |
| PLXDC2     | 2.99E-115 | 0.993707391 | 0.394 | 0.068 | 1.83E-110 | 5.79E+00    | macrophages    | PLXDC2     |
| SH3BGRL4   | 0         | 0.993379672 | 0.622 | 0.086 | 0         | 7.23255814  | PTM_cells      | SH3BGRL    |
| TLN11      | 5.10E-117 | 0.993198642 | 0.698 | 0.322 | 3.13E-112 | 2.17E+00    | VSM_cells      | TLN1       |
| ABRACL     | 0         | 0.993084042 | 0.314 | 0.028 | 0         | 11.21428571 | Sertoli_cells  | ABRACL     |
| MAP1B2     | 1.71E-204 | 0.992878686 | 0.649 | 0.155 | 1.05E-199 | 4.19E+00    | VSM_cells      | MAP1B      |
| ICA1       | 0         | 0.992718756 | 0.749 | 0.363 | 0         | 2.063360882 | spermatid      | ICA1       |
| BTG21      | 3.14E-83  | 0.992443534 | 0.492 | 0.129 | 1.93E-78  | 3.81E+00    | macrophages    | BTG2       |
| RPL23A3    | 1.56E-116 | 0.992403431 | 0.89  | 0.735 | 9.55E-112 | 1.21E+00    | VSM_cells      | RPL23A     |
| COX8A1     | 3.66E-172 | 0.991742085 | 0.451 | 0.216 | 2.25E-167 | 2.09E+00    | Sertoli_cells  | COX8A      |
| NFIA1      | 0         | 0.991502949 | 0.646 | 0.193 | 0         | 3.347150259 | PTM_cells      | NFIA       |
| VCX3A      | 0         | 0.991076608 | 0.431 | 0.094 | 0         | 4.585106383 | spermatogonia  | VCX3A      |
| KLF91      | 7.87E-204 | 0.990461389 | 0.449 | 0.146 | 4.83E-199 | 3.08E+00    | Leydig_cells   | KLF9       |
| RP6-91H8.2 | 0         | 0.990461288 | 0.5   | 0.097 | 0         | 5.154639175 | spermatocyte   | RP6-91H8.2 |

|               |             |             |       |       |             |             |                |               |
|---------------|-------------|-------------|-------|-------|-------------|-------------|----------------|---------------|
| ECSCR.1       | 0           | 0.990071563 | 0.514 | 0.001 | 0           | 514         | endotheliocyte | ECSCR.1       |
| ETNK2         | 0           | 0.989858932 | 0.734 | 0.333 | 0           | 2.204204204 | spermatid      | ETNK2         |
| NME5          | 0           | 0.988926554 | 0.965 | 0.431 | 0           | 2.238979118 | spermatocyte   | NME5          |
| FMO2          | 0           | 0.988771928 | 0.447 | 0.01  | 0           | 44.7        | endotheliocyte | FMO2          |
| TXN1          | 3.13E-228   | 0.988134228 | 0.593 | 0.25  | 1.92E-223   | 2.37E+00    | Leydig_cells   | TXN           |
| PDLIM2        | 0           | 0.988094398 | 0.548 | 0.044 | 0           | 12.45454545 | PTM_cells      | PDLIM2        |
| SYK           | 1.72E-251   | 0.98778101  | 0.354 | 0.026 | 1.06E-246   | 1.36E+01    | macrophages    | SYK           |
| WTIP          | 1.41E-277   | 0.987708455 | 0.571 | 0.096 | 8.64E-273   | 5.95E+00    | VSM_cells      | WTIP          |
| TPT16         | 5.03E-12    | 0.987448948 | 0.921 | 0.859 | 3.09E-07    | 1.07E+00    | T_cells        | TPT1          |
| FOXC1         | 2.61E-300   | 0.987272489 | 0.538 | 0.066 | 1.60E-295   | 8.15E+00    | endotheliocyte | FOXC1         |
| RPL10L        | 0           | 0.987000379 | 0.96  | 0.397 | 0           | 2.41813602  | spermatocyte   | RPL10L        |
| ANXA5         | 1.79E-268   | 0.986828174 | 0.686 | 0.304 | 1.10E-263   | 2.26E+00    | Leydig_cells   | ANXA5         |
| NUDT11        | 0           | 0.986555553 | 0.354 | 0.077 | 0           | 4.597402597 | Sertoli_cells  | NUDT11        |
| TGFB1111      | 0           | 0.986236132 | 0.548 | 0.052 | 0           | 10.53846154 | VSM_cells      | TGFB111       |
| IRF2BP21      | 1.08E-29    | 0.985822014 | 0.535 | 0.346 | 6.60E-25    | 1.55E+00    | macrophages    | IRF2BP2       |
| MT-ND26       | 5.61E-11    | 0.985231585 | 0.816 | 0.413 | 3.44E-06    | 1.98E+00    | T_cells        | MT-ND2        |
| TEX19         | 0           | 0.984270857 | 0.186 | 0.016 | 0           | 11.625      | spermatogonia  | TEX19         |
| CD59          | 4.61E-107   | 0.98426424  | 0.816 | 0.503 | 2.83E-102   | 1.62E+00    | endotheliocyte | CD59          |
| MS4A6E        | 0           | 0.984125792 | 0.684 | 0.401 | 0           | 1.705735661 | spermatid      | MS4A6E        |
| MAGED2        | 0           | 0.984099332 | 0.556 | 0.123 | 0           | 4.520325203 | Leydig_cells   | MAGED2        |
| DYDC1         | 0           | 0.983524636 | 0.908 | 0.306 | 0           | 2.967320261 | spermatocyte   | DYDC1         |
| LMNA5         | 0.001129508 | 0.983439629 | 0.5   | 0.372 | 1           | 1.344086022 | T_cells        | LMNA          |
| TPM3          | 3.61E-130   | 0.983417232 | 0.824 | 0.383 | 2.22E-125   | 2.15E+00    | endotheliocyte | TPM3          |
| SDCBP2        | 3.14E-288   | 0.983280164 | 0.557 | 0.177 | 1.93E-283   | 3.15E+00    | Leydig_cells   | SDCBP         |
| CX3CL1        | 0           | 0.983107162 | 0.447 | 0.021 | 0           | 21.28571429 | endotheliocyte | CX3CL1        |
| NACA          | 2.30E-99    | 0.983103971 | 0.898 | 0.747 | 1.41E-94    | 1.20E+00    | endotheliocyte | NACA          |
| MAGED1        | 0           | 0.982829352 | 0.363 | 0.06  | 0           | 6.05        | Sertoli_cells  | MAGED1        |
| RANGAP1       | 0           | 0.982408411 | 0.679 | 0.397 | 0           | 1.710327456 | spermatid      | RANGAP1       |
| SOCS2         | 2.18E-143   | 0.982327248 | 0.543 | 0.142 | 1.34E-138   | 3.82E+00    | endotheliocyte | SOCS2         |
| IFITM21       | 5.87E-61    | 0.982256816 | 0.488 | 0.162 | 3.60E-56    | 3.01E+00    | macrophages    | IFITM2        |
| LDHB3         | 5.95E-199   | 0.98191622  | 0.474 | 0.205 | 3.65E-194   | 2.31E+00    | Sertoli_cells  | LDHB          |
| EIF4H         | 0           | 0.981075311 | 0.734 | 0.529 | 0           | 1.387523629 | spermatid      | EIF4H         |
| GNB2L13       | 6.35E-120   | 0.98070242  | 0.822 | 0.465 | 3.90E-115   | 1.77E+00    | VSM_cells      | GNB2L1        |
| SH3GL3        | 0           | 0.9799683   | 0.75  | 0.425 | 0           | 1.764705882 | spermatid      | SH3GL3        |
| STEAP4        | 1.49E-266   | 0.97991371  | 0.41  | 0.101 | 9.12E-262   | 4.06E+00    | Leydig_cells   | STEAP4        |
| MT.ND41       | 2.62E-27    | 0.979505707 | 0.576 | 0.372 | 1.61E-22    | 1.55E+00    | macrophages    | MT.ND4        |
| CALM2         | 0           | 0.979062958 | 0.916 | 0.751 | 0           | 1.219707057 | spermatogonia  | CALM2         |
| LINC00854     | 0           | 0.978480388 | 0.326 | 0.072 | 0           | 4.527777778 | spermatid      | LINC00854     |
| IL6ST         | 2.50E-114   | 0.97819727  | 0.677 | 0.269 | 1.53E-109   | 2.52E+00    | endotheliocyte | IL6ST         |
| MBNL3         | 0           | 0.977858172 | 0.343 | 0.035 | 0           | 9.8         | Sertoli_cells  | MBNL3         |
| CMTM2         | 0           | 0.977594078 | 0.998 | 0.841 | 0           | 1.186682521 | spermatocyte   | CMTM2         |
| PLAGL1        | 0           | 0.977063187 | 0.426 | 0.028 | 0           | 15.21428571 | Leydig_cells   | PLAGL1        |
| CCDC179       | 0           | 0.976763355 | 0.548 | 0.144 | 0           | 3.805555556 | spermatid      | CCDC179       |
| MT.ATP63      | 6.52E-12    | 0.976324028 | 0.349 | 0.347 | 4.00E-07    | 1.01E+00    | Sertoli_cells  | MT.ATP6       |
| AC010980.2    | 0           | 0.976078746 | 0.407 | 0.15  | 0           | 2.713333333 | spermatocyte   | AC010980.2    |
| COX7A2        | 0           | 0.975832383 | 0.995 | 0.801 | 0           | 1.242197253 | spermatocyte   | COX7A2        |
| ZMYND12       | 0           | 0.975793524 | 0.946 | 0.294 | 0           | 3.217687075 | spermatocyte   | ZMYND12       |
| PLA2G16       | 6.78E-119   | 0.975739128 | 0.579 | 0.462 | 4.16E-114   | 1.25E+00    | Sertoli_cells  | PLA2G16       |
| IFI44L        | 0           | 0.975650574 | 0.536 | 0.032 | 0           | 16.75       | endotheliocyte | IFI44L        |
| MT-ND51       | 4.97E-137   | 0.975469841 | 0.581 | 0.285 | 3.05E-132   | 2.04E+00    | Leydig_cells   | MT-ND5        |
| BAG1          | 0           | 0.974356455 | 0.808 | 0.613 | 0           | 1.318107667 | spermatid      | BAG1          |
| MT1X2         | 1.04E-282   | 0.974209508 | 0.459 | 0.057 | 6.35E-278   | 8.05E+00    | VSM_cells      | MT1X          |
| SMOC2         | 0           | 0.973776534 | 0.548 | 0.069 | 0           | 7.942028986 | Leydig_cells   | SMOC2         |
| MT-ND4        | 3.35E-166   | 0.97375827  | 0.503 | 0.396 | 2.06E-161   | 1.27E+00    | spermatogonia  | MT-ND4        |
| RPL394        | 1.55E-177   | 0.973757437 | 0.822 | 0.273 | 9.50E-173   | 3.01E+00    | VSM_cells      | RPL39         |
| EMP2          | 7.89E-143   | 0.973550084 | 0.628 | 0.183 | 4.84E-138   | 3.43E+00    | endotheliocyte | EMP2          |
| PARP1         | 0           | 0.973092442 | 0.664 | 0.22  | 0           | 3.018181818 | spermatogonia  | PARP1         |
| ZC2HC1C       | 0           | 0.973014727 | 0.943 | 0.349 | 0           | 2.702005731 | spermatocyte   | ZC2HC1C       |
| SERPINF12     | 0           | 0.972877555 | 0.467 | 0.129 | 0           | 3.620155039 | Sertoli_cells  | SERPINF1      |
| HES1          | 9.01E-260   | 0.972744893 | 0.538 | 0.074 | 5.53E-255   | 7.27E+00    | endotheliocyte | HES1          |
| VWA3B         | 0           | 0.972633429 | 0.704 | 0.303 | 0           | 2.323432343 | spermatid      | VWA3B         |
| C16orf71      | 0           | 0.972525116 | 0.822 | 0.243 | 0           | 3.382716049 | spermatocyte   | C16orf71      |
| SBNO1         | 0           | 0.972104694 | 0.787 | 0.465 | 0           | 1.692473118 | spermatogonia  | SBNO1         |
| CCT6A         | 0           | 0.972062217 | 0.696 | 0.287 | 0           | 2.425087108 | spermatogonia  | CCT6A         |
| NDUFAF3       | 0           | 0.970840893 | 0.995 | 0.702 | 0           | 1.417378917 | spermatocyte   | NDUFAF3       |
| RP11-620J15.3 | 2.26E-170   | 0.970512616 | 0.36  | 0.219 | 1.38E-165   | 1.64E+00    | spermatogonia  | RP11-620J15.3 |
| RGS10         | 4.69E-227   | 0.970346197 | 0.357 | 0.029 | 2.88E-222   | 1.23E+01    | macrophages    | RGS10         |
| SLC25A66      | 3.38E-09    | 0.970187267 | 0.526 | 0.196 | 0.000207255 | 2.683673469 | T_cells        | SLC25A6       |
| SELM2         | 0           | 0.970067357 | 0.616 | 0.198 | 0           | 3.111111111 | PTM_cells      | SELM          |
| CD813         | 2.06E-132   | 0.969700693 | 0.744 | 0.31  | 1.26E-127   | 2.40E+00    | VSM_cells      | CD81          |
| GPI           | 0           | 0.96956224  | 0.659 | 0.25  | 0           | 2.636       | spermatid      | GPI           |
| GAS61         | 0           | 0.969221383 | 0.371 | 0.072 | 0           | 5.152777778 | Sertoli_cells  | GAS6          |
| CD371         | 9.39E-13    | 0.968928463 | 0.5   | 0.142 | 5.76E-08    | 3.52E+00    | T_cells        | CD37          |
| AHR           | 7.95E-115   | 0.968820457 | 0.3   | 0.04  | 4.87E-110   | 7.50E+00    | macrophages    | AHR           |
| ARRDC31       | 7.19E-25    | 0.968778466 | 0.347 | 0.167 | 4.41E-20    | 2.08E+00    | macrophages    | ARRDC3        |



|           |           |             |       |       |             |             |                |           |
|-----------|-----------|-------------|-------|-------|-------------|-------------|----------------|-----------|
| CMTM31    | 0         | 0.968761308 | 0.335 | 0.047 | 0           | 7.127659574 | Sertoli_cells  | CMTM3     |
| PHACTR1   | 1.55E-50  | 0.968740131 | 0.377 | 0.122 | 9.51E-46    | 3.09E+00    | macrophages    | PHACTR1   |
| WBP52     | 1.36E-144 | 0.96871588  | 0.264 | 0.087 | 8.37E-140   | 3.03E+00    | Sertoli_cells  | WBP5      |
| KANK22    | 0         | 0.968669729 | 0.564 | 0.071 | 0           | 7.943661972 | VSM_cells      | KANK2     |
| MFAP3L    | 0         | 0.96841968  | 0.683 | 0.317 | 0           | 2.154574132 | spermatid      | MFAP3L    |
| SPEM1     | 0         | 0.96827984  | 0.582 | 0.175 | 0           | 3.325714286 | spermatid      | SPEM1     |
| INMT1     | 0         | 0.968240266 | 0.535 | 0.027 | 0           | 19.81481481 | PTM_cells      | INMT      |
| EGR3      | 1.34E-136 | 0.968189762 | 0.289 | 0.109 | 8.24E-132   | 2.65E+00    | Sertoli_cells  | EGR3      |
| IFI161    | 9.00E-101 | 0.968146437 | 0.414 | 0.082 | 5.52E-96    | 5.05E+00    | macrophages    | IFI16     |
| TPM31     | 4.20E-32  | 0.967862633 | 0.593 | 0.387 | 2.58E-27    | 1.53E+00    | macrophages    | TPM3      |
| RPL34P27  | 7.57E-21  | 0.967668611 | 0.401 | 0.23  | 4.64E-16    | 1.74E+00    | macrophages    | RPL34P27  |
| IGFBP4    | 0         | 0.967504458 | 0.493 | 0.069 | 0           | 7.144927536 | Leydig_cells   | IGFBP4    |
| PABPC3    | 0         | 0.967391315 | 0.943 | 0.337 | 0           | 2.798219585 | spermatocyte   | PABPC3    |
| PPP1R18   | 3.22E-15  | 0.967247468 | 0.368 | 0.067 | 1.97E-10    | 5.49E+00    | T_cells        | PPP1R18   |
| PTGER4    | 6.53E-08  | 0.9666831   | 0.289 | 0.076 | 0.004007477 | 3.802631579 | T_cells        | PTGER4    |
| CAST      | 0         | 0.965414946 | 0.753 | 0.536 | 0           | 1.404850746 | spermatid      | CAST      |
| RPS6      | 1.71E-137 | 0.965391164 | 0.985 | 0.93  | 1.05E-132   | 1.06E+00    | endotheliocyte | RPS6      |
| EEF1A1    | 2.12E-91  | 0.965323509 | 0.993 | 0.924 | 1.30E-86    | 1.07E+00    | macrophages    | EEF1A1    |
| PRDM1     | 1.63E-256 | 0.965011435 | 0.263 | 0.013 | 1.00E-251   | 2.02E+01    | macrophages    | PRDM1     |
| APBB1IP   | 9.46E-114 | 0.964867387 | 0.263 | 0.005 | 5.80E-109   | 5.26E+01    | T_cells        | APBB1IP   |
| IFITM3    | 0         | 0.964730187 | 0.553 | 0.174 | 0           | 3.17816092  | Sertoli_cells  | IFITM3    |
| LGALS14   | 2.41E-08  | 0.964518008 | 0.553 | 0.209 | 0.001476105 | 2.645933014 | T_cells        | LGALS1    |
| PODN      | 0         | 0.964291734 | 0.473 | 0.031 | 0           | 15.25806452 | Leydig_cells   | PODN      |
| RPS233    | 0         | 0.964275134 | 0.936 | 0.824 | 0           | 1.13592233  | PTM_cells      | RPS23     |
| MTATP6P11 | 2.32E-46  | 0.964228551 | 0.549 | 0.232 | 1.42E-41    | 2.37E+00    | macrophages    | MTATP6P11 |
| HNRNPDL   | 0         | 0.964139233 | 0.734 | 0.391 | 0           | 1.877237852 | spermatogonia  | HNRNPDL   |
| RPLP15    | 0         | 0.964039039 | 0.913 | 0.756 | 0           | 1.207671958 | Sertoli_cells  | RPLP1     |
| RPS232    | 1.28E-306 | 0.963990609 | 0.958 | 0.824 | 7.86E-302   | 1.16E+00    | Leydig_cells   | RPS23     |
| TCEAL8    | 0         | 0.963882181 | 0.337 | 0.063 | 0           | 5.349206349 | Sertoli_cells  | TCEAL8    |
| EVI2B1    | 3.93E-21  | 0.963804972 | 0.316 | 0.037 | 2.41E-16    | 8.54E+00    | T_cells        | EVI2B     |
| USP2      | 0         | 0.963696653 | 0.734 | 0.49  | 0           | 1.497959184 | spermatid      | USP2      |
| LAMC3     | 0         | 0.963612966 | 0.463 | 0.058 | 0           | 7.982758621 | Leydig_cells   | LAMC3     |
| PLTP1     | 0         | 0.963431423 | 0.607 | 0.146 | 0           | 4.157534247 | PTM_cells      | PLTP      |
| ATP2B11   | 4.08E-64  | 0.963225757 | 0.444 | 0.131 | 2.50E-59    | 3.39E+00    | macrophages    | ATP2B1    |
| NDN       | 0         | 0.963123997 | 0.539 | 0.133 | 0           | 4.052631579 | Leydig_cells   | NDN       |
| F10       | 0         | 0.963099478 | 0.469 | 0.056 | 0           | 8.375       | Leydig_cells   | F10       |
| C19orf71  | 0         | 0.961817549 | 0.584 | 0.201 | 0           | 2.905472637 | spermatid      | C19orf71  |
| MAP1B     | 0         | 0.961484443 | 0.566 | 0.146 | 0           | 3.876712329 | Leydig_cells   | MAP1B     |
| NFIX      | 1.24E-180 | 0.961396735 | 0.478 | 0.179 | 7.62E-176   | 2.67E+00    | Leydig_cells   | NFIX      |
| VAMP5     | 0         | 0.961076757 | 0.571 | 0.067 | 0           | 8.52238806  | endotheliocyte | VAMP5     |
| C16orf95  | 0         | 0.960288683 | 0.879 | 0.272 | 0           | 3.231617647 | spermatocyte   | C16orf95  |
| TSPAN6    | 0         | 0.959915224 | 0.612 | 0.265 | 0           | 2.309433962 | spermatid      | TSPAN6    |
| EVI2B     | 4.99E-197 | 0.95971691  | 0.354 | 0.033 | 3.06E-192   | 1.07E+01    | macrophages    | EVI2B     |
| S100A13   | 0         | 0.959447401 | 0.527 | 0.096 | 0           | 5.489583333 | Leydig_cells   | S100A13   |
| RPS173    | 7.08E-230 | 0.959145268 | 0.827 | 0.459 | 4.34E-225   | 1.80E+00    | Leydig_cells   | RPS17     |
| CAV2      | 9.51E-238 | 0.958844467 | 0.63  | 0.116 | 5.83E-233   | 5.43E+00    | endotheliocyte | CAV2      |
| TRMT112   | 0         | 0.958688053 | 0.777 | 0.457 | 0           | 1.700218818 | spermatogonia  | TRMT112   |
| PNRC15    | 1.48E-07  | 0.958648246 | 0.658 | 0.398 | 0.009100716 | 1.653266332 | T_cells        | PNRC1     |
| TCEAL3    | 0         | 0.958383743 | 0.563 | 0.063 | 0           | 8.936507937 | PTM_cells      | TCEAL3    |
| C1orf122  | 1.17E-117 | 0.957859887 | 0.391 | 0.212 | 7.20E-113   | 1.84E+00    | Sertoli_cells  | C1orf122  |
| FCGRT     | 3.49E-176 | 0.957733147 | 0.692 | 0.187 | 2.14E-171   | 3.70E+00    | endotheliocyte | FCGRT     |
| ZNF331    | 2.69E-22  | 0.956896872 | 0.468 | 0.296 | 1.65E-17    | 1.58E+00    | macrophages    | ZNF331    |
| GNAQ      | 7.72E-197 | 0.956817894 | 0.581 | 0.117 | 4.74E-192   | 4.97E+00    | endotheliocyte | GNAQ      |
| RNF138    | 0         | 0.956659138 | 0.795 | 0.583 | 0           | 1.363636364 | spermatid      | RNF138    |
| JUND4     | 1.91E-106 | 0.956250057 | 0.825 | 0.498 | 1.17E-101   | 1.66E+00    | VSM_cells      | JUND      |
| MT.ND11   | 1.95E-27  | 0.956174805 | 0.576 | 0.377 | 1.20E-22    | 1.53E+00    | macrophages    | MT.ND1    |
| GPR65     | 9.13E-22  | 0.955896406 | 0.263 | 0.025 | 5.60E-17    | 1.05E+01    | T_cells        | GPR65     |
| SDCBP1    | 6.08E-55  | 0.955703872 | 0.492 | 0.189 | 3.73E-50    | 2.60E+00    | macrophages    | SDCBP     |
| RPS32     | 1.90E-290 | 0.955240441 | 0.938 | 0.794 | 1.16E-285   | 1.18E+00    | Leydig_cells   | RPS3      |
| RPL212    | 9.60E-72  | 0.955087449 | 0.889 | 0.473 | 5.89E-67    | 1.88E+00    | macrophages    | RPL21     |
| HLA-DRB12 | 6.10E-07  | 0.954884136 | 0.395 | 0.152 | 0.037443349 | 2.598684211 | T_cells        | HLA-DRB1  |
| SNRPB     | 0         | 0.954575152 | 0.667 | 0.287 | 0           | 2.324041812 | spermatogonia  | SNRPB     |
| PCAT19    | 0         | 0.954506529 | 0.474 | 0.007 | 0           | 67.71428571 | endotheliocyte | PCAT19    |
| GK2       | 0         | 0.954463901 | 0.973 | 0.399 | 0           | 2.438596491 | spermatocyte   | GK2       |
| CXorf65   | 0         | 0.95438763  | 0.59  | 0.145 | 0           | 4.068965517 | spermatid      | CXorf65   |
| PLAC9     | 0         | 0.954237092 | 0.596 | 0.079 | 0           | 7.544303797 | VSM_cells      | PLAC9     |
| EID13     | 7.89E-123 | 0.954055572 | 0.767 | 0.359 | 4.84E-118   | 2.14E+00    | VSM_cells      | EID1      |
| DRG1      | 0         | 0.953953089 | 0.981 | 0.53  | 0           | 1.850943396 | spermatocyte   | DRG1      |
| SVIL      | 0         | 0.95366021  | 0.565 | 0.1   | 0           | 5.65        | PTM_cells      | SVIL      |
| AHNAK5    | 3.91E-09  | 0.953036705 | 0.5   | 0.172 | 0.000239985 | 2.906976744 | T_cells        | AHNAK     |
| SH3GLB1   | 0         | 0.952965185 | 0.983 | 0.555 | 0           | 1.771171171 | spermatocyte   | SH3GLB1   |
| JAG1      | 8.26E-292 | 0.952927719 | 0.444 | 0.046 | 5.07E-287   | 9.65E+00    | endotheliocyte | JAG1      |
| RPS264    | 1.19E-97  | 0.952888357 | 0.808 | 0.533 | 7.31E-93    | 1.52E+00    | VSM_cells      | RPS26     |
| HBEGF1    | 1.33E-78  | 0.952796742 | 0.256 | 0.041 | 8.16E-74    | 6.24E+00    | macrophages    | HBEGF     |
| ECHS1     | 2.37E-104 | 0.95266857  | 0.465 | 0.317 | 1.45E-99    | 1.47E+00    | Sertoli_cells  | ECHS1     |

|          |           |             |       |       |             |             |                |          |
|----------|-----------|-------------|-------|-------|-------------|-------------|----------------|----------|
| FBXO24   | 0         | 0.952301703 | 0.701 | 0.302 | 0           | 2.321192053 | spermatid      | FBXO24   |
| SLBP     | 0         | 0.951849076 | 0.616 | 0.239 | 0           | 2.577405858 | spermatogonia  | SLBP     |
| BRDT     | 0         | 0.951547099 | 0.992 | 0.54  | 0           | 1.837037037 | spermatocyte   | BRDT     |
| FAM171A1 | 0         | 0.951542616 | 0.524 | 0.016 | 0           | 32.75       | endotheliocyte | FAM171A1 |
| GLIPR1L1 | 0         | 0.951478378 | 0.848 | 0.232 | 0           | 3.655172414 | spermatocyte   | GLIPR1L1 |
| CD86     | 1.22E-147 | 0.951379997 | 0.343 | 0.042 | 7.47E-143   | 8.17E+00    | macrophages    | CD86     |
| CCNL12   | 2.83E-161 | 0.951368607 | 0.613 | 0.336 | 1.74E-156   | 1.82E+00    | Leydig_cells   | CCNL1    |
| WWTR1    | 1.99E-222 | 0.951043663 | 0.553 | 0.096 | 1.22E-217   | 5.76E+00    | endotheliocyte | WWTR1    |
| NEAT15   | 4.13E-08  | 0.951011948 | 0.526 | 0.197 | 0.002533917 | 2.670050761 | T_cells        | NEAT1    |
| DYRK3    | 0         | 0.95069892  | 0.939 | 0.276 | 0           | 3.402173913 | spermatocyte   | DYRK3    |
| JUND5    | 6.01E-07  | 0.950694806 | 0.737 | 0.504 | 0.036896069 | 1.462301587 | T_cells        | JUND     |
| GYP2     | 1.20E-19  | 0.950412856 | 0.316 | 0.039 | 7.34E-15    | 8.10E+00    | T_cells        | GYP2     |
| TMBIM4   | 0         | 0.95025555  | 0.879 | 0.444 | 0           | 1.97972973  | spermatocyte   | TMBIM4   |
| RPS34    | 8.62E-111 | 0.950088369 | 0.896 | 0.798 | 5.29E-106   | 1.12E+00    | VSM_cells      | RPS3     |
| ADIG     | 0         | 0.949236596 | 0.605 | 0.166 | 0           | 3.644578313 | spermatid      | ADIG     |
| CTSH     | 1.59E-65  | 0.948585658 | 0.397 | 0.112 | 9.74E-61    | 3.54E+00    | macrophages    | CTSH     |
| GNG2     | 0         | 0.948570138 | 0.702 | 0.366 | 0           | 1.918032787 | spermatid      | GNG2     |
| CHST13   | 0         | 0.947772243 | 0.856 | 0.168 | 0           | 5.095238095 | spermatocyte   | CHST13   |
| A2M1     | 2.34E-60  | 0.947443095 | 0.394 | 0.112 | 1.44E-55    | 3.52E+00    | macrophages    | A2M      |
| RPL223   | 2.85E-106 | 0.947101901 | 0.85  | 0.645 | 1.75E-101   | 1.32E+00    | VSM_cells      | RPL22    |
| LAMA4    | 3.49E-194 | 0.946951139 | 0.56  | 0.245 | 2.14E-189   | 2.29E+00    | Leydig_cells   | LAMA4    |
| ACRV1    | 0         | 0.946783722 | 0.631 | 0.357 | 0           | 1.767507003 | spermatid      | ACRV1    |
| TUBA1A1  | 1.53E-34  | 0.946667735 | 0.451 | 0.202 | 9.37E-30    | 2.23E+00    | macrophages    | TUBA1A   |
| SPATA7   | 0         | 0.946377048 | 0.779 | 0.465 | 0           | 1.675268817 | spermatid      | SPATA7   |
| PDLIM3   | 0         | 0.946303281 | 0.491 | 0.037 | 0           | 13.27027027 | PTM_cells      | PDLIM3   |
| RPL13    | 3.64E-138 | 0.945939848 | 0.99  | 0.956 | 2.24E-133   | 1.04E+00    | endotheliocyte | RPL13    |
| ARRDC3   | 2.18E-81  | 0.945574611 | 0.474 | 0.164 | 1.34E-76    | 2.89E+00    | endotheliocyte | ARRDC3   |
| CD44     | 1.05E-73  | 0.94546629  | 0.387 | 0.096 | 6.47E-69    | 4.03E+00    | macrophages    | CD44     |
| PTMA5    | 1.05E-11  | 0.945236437 | 0.921 | 0.656 | 6.45E-07    | 1.40E+00    | T_cells        | PTMA     |
| MGST2    | 0         | 0.945105089 | 0.603 | 0.062 | 0           | 9.725806452 | endotheliocyte | MGST2    |
| TTYH1    | 0         | 0.944458377 | 0.324 | 0.036 | 0           | 9           | Sertoli_cells  | TTYH1    |
| ETS11    | 6.27E-20  | 0.94386516  | 0.316 | 0.039 | 3.85E-15    | 8.10E+00    | T_cells        | ETS1     |
| MBNL14   | 4.04E-12  | 0.943860016 | 0.421 | 0.105 | 2.48E-07    | 4.01E+00    | T_cells        | MBNL1    |
| CALM1    | 2.93E-103 | 0.943804612 | 0.916 | 0.69  | 1.80E-98    | 1.33E+00    | endotheliocyte | CALM1    |
| KPNA2    | 0         | 0.943703884 | 0.984 | 0.54  | 0           | 1.822222222 | spermatocyte   | KPNA2    |
| DCAF1    | 0         | 0.942907144 | 0.354 | 0.112 | 0           | 3.160714286 | spermatid      | DCAF1    |
| CBX3     | 0         | 0.942458448 | 0.783 | 0.49  | 0           | 1.597959184 | spermatogonia  | CBX3     |
| CMTM6    | 5.70E-46  | 0.942091738 | 0.455 | 0.188 | 3.49E-41    | 2.42E+00    | macrophages    | CMTM6    |
| NTRK3    | 1.60E-103 | 0.941444739 | 0.573 | 0.235 | 9.79E-99    | 2.44E+00    | VSM_cells      | NTRK3    |
| PDGFRB2  | 4.23E-228 | 0.941329892 | 0.478 | 0.078 | 2.59E-223   | 6.13E+00    | VSM_cells      | PDGFRB   |
| HIST1H1A | 0         | 0.940955018 | 0.209 | 0.016 | 0           | 13.0625     | spermatogonia  | HIST1H1A |
| CD151    | 0         | 0.940940135 | 0.59  | 0.079 | 0           | 7.46835443  | PTM_cells      | CD151    |
| MATN2    | 0         | 0.940801534 | 0.591 | 0.176 | 0           | 3.357954545 | PTM_cells      | MATN2    |
| ARL6IP52 | 8.98E-279 | 0.940117294 | 0.57  | 0.189 | 5.51E-274   | 3.02E+00    | Leydig_cells   | ARL6IP5  |
| LPP1     | 1.52E-106 | 0.939925278 | 0.82  | 0.476 | 9.34E-102   | 1.72E+00    | VSM_cells      | LPP      |
| SHCBP1L  | 0         | 0.939769045 | 0.991 | 0.504 | 0           | 1.966269841 | spermatocyte   | SHCBP1L  |
| RPL124   | 2.45E-94  | 0.939645988 | 0.839 | 0.632 | 1.50E-89    | 1.33E+00    | VSM_cells      | RPL12    |
| ANP32B   | 0         | 0.939407979 | 0.652 | 0.351 | 0           | 1.857549858 | spermatogonia  | ANP32B   |
| RPS121   | 9.05E-122 | 0.939131133 | 0.975 | 0.831 | 5.55E-117   | 1.17E+00    | endotheliocyte | RPS12    |
| LEPR     | 0         | 0.939078571 | 0.471 | 0.026 | 0           | 18.11538462 | endotheliocyte | LEPR     |
| RRAS     | 0         | 0.938510544 | 0.543 | 0.058 | 0           | 9.362068966 | VSM_cells      | RRAS     |
| HNRNPH3  | 0         | 0.938454161 | 0.741 | 0.372 | 0           | 1.991935484 | spermatogonia  | HNRNPH3  |
| SNHG8    | 2.78E-107 | 0.9382076   | 0.458 | 0.299 | 1.71E-102   | 1.53E+00    | Sertoli_cells  | SNHG8    |
| S100A11  | 6.75E-47  | 0.938162054 | 0.64  | 0.351 | 4.14E-42    | 1.82E+00    | macrophages    | S100A11  |
| METTL7A  | 0         | 0.93795703  | 0.445 | 0.043 | 0           | 10.34883721 | Leydig_cells   | METTL7A  |
| RPS2     | 0         | 0.937884328 | 0.808 | 0.641 | 0           | 1.260530421 | spermatogonia  | RPS2     |
| C1orf115 | 0         | 0.937842444 | 0.519 | 0.024 | 0           | 21.625      | endotheliocyte | C1orf115 |
| NEK2     | 0         | 0.937832776 | 0.851 | 0.265 | 0           | 3.211320755 | spermatocyte   | NEK2     |
| IRF12    | 2.64E-182 | 0.93779099  | 0.523 | 0.21  | 1.62E-177   | 2.49E+00    | Leydig_cells   | IRF1     |
| IL1RN    | 1.87E-21  | 0.937782729 | 0.226 | 0.084 | 1.15E-16    | 2.69E+00    | macrophages    | IL1RN    |
| CTSC1    | 0         | 0.937615494 | 0.426 | 0.036 | 0           | 11.83333333 | Leydig_cells   | CTSC     |
| CYLC1    | 0         | 0.937501911 | 0.665 | 0.275 | 0           | 2.418181818 | spermatid      | CYLC1    |
| CD53     | 0         | 0.937460081 | 0.323 | 0.002 | 0           | 161.5       | macrophages    | CD53     |
| STK31    | 0         | 0.93721334  | 0.685 | 0.297 | 0           | 2.306397306 | spermatogonia  | STK31    |
| MT.ATP61 | 4.08E-30  | 0.937129198 | 0.576 | 0.345 | 2.50E-25    | 1.67E+00    | macrophages    | MT.ATP6  |
| IFI273   | 5.58E-200 | 0.937091214 | 0.365 | 0.119 | 3.42E-195   | 3.07E+00    | Sertoli_cells  | IFI27    |
| ATP6V1F  | 0         | 0.936652149 | 0.979 | 0.586 | 0           | 1.670648464 | spermatocyte   | ATP6V1F  |
| FTL      | 2.77E-117 | 0.936540406 | 0.883 | 0.523 | 1.70E-112   | 1.69E+00    | endotheliocyte | FTL      |
| RGS22    | 0         | 0.936421278 | 0.789 | 0.552 | 0           | 1.429347826 | spermatid      | RGS22    |
| INPP1    | 0         | 0.936178931 | 0.696 | 0.348 | 0           | 2           | spermatid      | INPP1    |
| ELP5     | 0         | 0.936144171 | 0.964 | 0.432 | 0           | 2.231481481 | spermatocyte   | ELP5     |
| CCDC54   | 0         | 0.93608365  | 0.779 | 0.401 | 0           | 1.942643392 | spermatid      | CCDC54   |
| NDRG1    | 0         | 0.936071984 | 0.551 | 0.067 | 0           | 8.223880597 | endotheliocyte | NDRG1    |
| WNT2B    | 0         | 0.935997438 | 0.519 | 0.048 | 0           | 10.8125     | PTM_cells      | WNT2B    |
| CAV23    | 5.18E-214 | 0.935358345 | 0.564 | 0.116 | 3.18E-209   | 4.86E+00    | VSM_cells      | CAV2     |

|          |           |             |       |       |             |             |                |          |
|----------|-----------|-------------|-------|-------|-------------|-------------|----------------|----------|
| INO80C   | 0         | 0.935302848 | 0.928 | 0.342 | 0           | 2.713450292 | spermatocyte   | INO80C   |
| BEX3     | 0         | 0.935211492 | 0.273 | 0.032 | 0           | 8.53125     | Sertoli_cells  | BEX3     |
| COL6A11  | 0         | 0.934955855 | 0.642 | 0.095 | 0           | 6.757894737 | PTM_cells      | COL6A1   |
| SPATA22  | 0         | 0.934921418 | 0.911 | 0.418 | 0           | 2.179425837 | spermatocyte   | SPATA22  |
| CDH5     | 1.12E-209 | 0.934908013 | 0.561 | 0.108 | 6.84E-205   | 5.19E+00    | endotheliocyte | CDH5     |
| KDM4D    | 0         | 0.934833682 | 0.936 | 0.245 | 0           | 3.820408163 | spermatocyte   | KDM4D    |
| ANXA12   | 0         | 0.934395532 | 0.471 | 0.065 | 0           | 7.246153846 | Leydig_cells   | ANXA1    |
| APLP2    | 0         | 0.933970749 | 0.64  | 0.235 | 0           | 2.723404255 | spermatogonia  | APLP2    |
| SET      | 0         | 0.933957242 | 0.714 | 0.316 | 0           | 2.259493671 | spermatogonia  | SET      |
| LGALS34  | 4.98E-174 | 0.933830363 | 0.44  | 0.193 | 3.06E-169   | 2.28E+00    | Sertoli_cells  | LGALS3   |
| TPT13    | 0         | 0.933627014 | 0.946 | 0.855 | 0           | 1.106432749 | PTM_cells      | TPT1     |
| FKBP1A   | 2.30E-93  | 0.933369716 | 0.754 | 0.431 | 1.41E-88    | 1.75E+00    | endotheliocyte | FKBP1A   |
| SEPP12   | 0         | 0.93332449  | 0.655 | 0.082 | 0           | 7.987804878 | PTM_cells      | SEPP1    |
| KPNA5    | 0         | 0.932810009 | 0.829 | 0.19  | 0           | 4.363157895 | spermatocyte   | KPNA5    |
| ACSL1    | 0         | 0.932538168 | 0.624 | 0.236 | 0           | 2.644067797 | spermatid      | ACSL1    |
| PDK42    | 5.82E-272 | 0.932503945 | 0.381 | 0.083 | 3.57E-267   | 4.59E+00    | Leydig_cells   | PDK4     |
| FAM166A  | 0         | 0.932502955 | 0.6   | 0.188 | 0           | 3.191489362 | spermatid      | FAM166A  |
| ACTL7B   | 0         | 0.932368572 | 0.726 | 0.4   | 0           | 1.815       | spermatid      | ACTL7B   |
| RPS4Y15  | 3.65E-08  | 0.932030517 | 0.605 | 0.274 | 0.002237865 | 2.208029197 | T_cells        | RPS4Y1   |
| CREB3L1  | 0         | 0.931951407 | 0.394 | 0.021 | 0           | 18.76190476 | Leydig_cells   | CREB3L1  |
| RPL276   | 8.76E-06  | 0.931757888 | 0.711 | 0.663 | 0.537151508 | 1.07239819  | T_cells        | RPL27    |
| PRPS2    | 0         | 0.931479831 | 0.49  | 0.08  | 0           | 6.125       | Leydig_cells   | PRPS2    |
| ROPN1    | 0         | 0.931252448 | 0.98  | 0.512 | 0           | 1.9140625   | spermatocyte   | ROPN1    |
| PTP4A1   | 0         | 0.931160662 | 0.717 | 0.45  | 0           | 1.593333333 | spermatid      | PTP4A1   |
| BRD7     | 0         | 0.930825133 | 0.664 | 0.304 | 0           | 2.184210526 | spermatogonia  | BRD7     |
| GBP4     | 0         | 0.930721114 | 0.459 | 0.008 | 0           | 57.375      | endotheliocyte | GBP4     |
| MT.ND4L  | 0         | 0.930560605 | 0.341 | 0.125 | 0           | 2.728       | spermatogonia  | MT.ND4L  |
| CTSK     | 0         | 0.930444366 | 0.439 | 0.042 | 0           | 10.45238095 | Leydig_cells   | CTSK     |
| EGR21    | 3.89E-280 | 0.930252296 | 0.278 | 0.057 | 2.39E-275   | 4.88E+00    | Sertoli_cells  | EGR2     |
| ITGB1    | 0         | 0.930235622 | 0.679 | 0.196 | 0           | 3.464285714 | Leydig_cells   | ITGB1    |
| RPL5     | 5.47E-133 | 0.929297857 | 0.978 | 0.853 | 3.35E-128   | 1.15E+00    | endotheliocyte | RPL5     |
| MT-ND25  | 1.89E-19  | 0.928769046 | 0.454 | 0.41  | 1.16E-14    | 1.11E+00    | Sertoli_cells  | MT-ND2   |
| NIPBL    | 0         | 0.928725953 | 0.617 | 0.22  | 0           | 2.804545455 | spermatogonia  | NIPBL    |
| TLR2     | 0         | 0.928608125 | 0.303 | 0.003 | 0           | 101         | macrophages    | TLR2     |
| CTSC2    | 1.75E-19  | 0.928459896 | 0.368 | 0.052 | 1.07E-14    | 7.08E+00    | T_cells        | CTSC     |
| METAP1   | 0         | 0.92797596  | 0.654 | 0.253 | 0           | 2.584980237 | spermatid      | METAP1   |
| LAMB2    | 0         | 0.927959583 | 0.467 | 0.079 | 0           | 5.911392405 | Leydig_cells   | LAMB2    |
| CDC424   | 7.56E-06  | 0.927907114 | 0.605 | 0.417 | 0.463917143 | 1.450839329 | T_cells        | CDC42    |
| TERF2IP  | 0         | 0.927848228 | 0.698 | 0.247 | 0           | 2.825910931 | spermatogonia  | TERF2IP  |
| RPL233   | 4.12E-289 | 0.927425859 | 0.877 | 0.694 | 2.53E-284   | 1.26E+00    | PTM_cells      | RPL23    |
| FTH13    | 0         | 0.927158153 | 0.936 | 0.712 | 0           | 1.314606742 | PTM_cells      | FTH1     |
| MRPS15   | 0         | 0.926961935 | 0.971 | 0.578 | 0           | 1.679930796 | spermatocyte   | MRPS15   |
| CYBRD1   | 0         | 0.926810635 | 0.469 | 0.043 | 0           | 10.90697674 | Leydig_cells   | CYBRD1   |
| SAMHD1   | 3.77E-105 | 0.926523322 | 0.377 | 0.067 | 2.31E-100   | 5.63E+00    | macrophages    | SAMHD1   |
| RPL52    | 0         | 0.926281823 | 0.938 | 0.851 | 0           | 1.102232667 | PTM_cells      | RPL5     |
| PPDPF1   | 3.09E-84  | 0.926253861 | 0.533 | 0.44  | 1.90E-79    | 1.21E+00    | Sertoli_cells  | PPDPF    |
| RPS24    | 1.06E-124 | 0.926215152 | 0.973 | 0.885 | 6.49E-120   | 1.10E+00    | endotheliocyte | RPS24    |
| SPATA24  | 0         | 0.926205569 | 0.732 | 0.491 | 0           | 1.490835031 | spermatid      | SPATA24  |
| DZIP3    | 0         | 0.926079333 | 0.683 | 0.302 | 0           | 2.261589404 | spermatogonia  | DZIP3    |
| SPATA4   | 0         | 0.92595379  | 0.983 | 0.516 | 0           | 1.90503876  | spermatocyte   | SPATA4   |
| PLK1     | 0         | 0.925825309 | 0.872 | 0.215 | 0           | 4.055813953 | spermatocyte   | PLK1     |
| MT.ATP8  | 0         | 0.925804893 | 0.335 | 0.132 | 0           | 2.537878788 | spermatogonia  | MT.ATP8  |
| SLC25A62 | 0         | 0.925599388 | 0.604 | 0.179 | 0           | 3.374301676 | Leydig_cells   | SLC25A6  |
| PSME1    | 2.78E-289 | 0.925480625 | 0.618 | 0.09  | 1.70E-284   | 6.87E+00    | endotheliocyte | PSME1    |
| MRVI11   | 2.07E-196 | 0.925084221 | 0.556 | 0.128 | 1.27E-191   | 4.34E+00    | VSM_cells      | MRVI1    |
| RPS124   | 4.10E-10  | 0.924803917 | 0.921 | 0.834 | 2.52E-05    | 1.10E+00    | T_cells        | RPS12    |
| HSPA8    | 0         | 0.924402973 | 0.803 | 0.501 | 0           | 1.602794411 | spermatogonia  | HSPA8    |
| CDKN1A2  | 7.62E-190 | 0.924231183 | 0.407 | 0.119 | 4.68E-185   | 3.42E+00    | Leydig_cells   | CDKN1A   |
| RNF2131  | 9.14E-20  | 0.924169612 | 0.368 | 0.052 | 5.61E-15    | 7.08E+00    | T_cells        | RNF213   |
| SOD1     | 0         | 0.923747852 | 0.77  | 0.525 | 0           | 1.466666667 | spermatogonia  | SOD1     |
| RPL342   | 1.73E-217 | 0.923465573 | 0.98  | 0.903 | 1.06E-212   | 1.09E+00    | Leydig_cells   | RPL34    |
| U2SURP   | 0         | 0.923447491 | 0.705 | 0.32  | 0           | 2.203125    | spermatogonia  | U2SURP   |
| C1orf234 | 0         | 0.923310876 | 0.651 | 0.277 | 0           | 2.350180505 | spermatid      | C1orf234 |
| PDGFRA1  | 0         | 0.922822173 | 0.538 | 0.045 | 0           | 11.95555556 | PTM_cells      | PDGFRA   |
| KLF9     | 4.28E-125 | 0.922694273 | 0.553 | 0.153 | 2.63E-120   | 3.61E+00    | endotheliocyte | KLF9     |
| FUNDC2P2 | 0         | 0.92244219  | 0.318 | 0.06  | 0           | 5.3         | spermatid      | FUNDC2P2 |
| UBE2J1   | 0         | 0.922349317 | 0.629 | 0.297 | 0           | 2.117845118 | spermatid      | UBE2J1   |
| DYNLRB2  | 0         | 0.922033691 | 0.968 | 0.549 | 0           | 1.763205829 | spermatocyte   | DYNLRB2  |
| SNCG     | 0         | 0.921866096 | 0.519 | 0.028 | 0           | 18.53571429 | endotheliocyte | SNCG     |
| RPL234   | 1.53E-104 | 0.921342645 | 0.86  | 0.7   | 9.37E-100   | 1.23E+00    | VSM_cells      | RPL23    |
| DGCR14   | 0         | 0.921331394 | 0.585 | 0.232 | 0           | 2.521551724 | spermatid      | DGCR14   |
| SPATA8   | 0         | 0.921185623 | 0.952 | 0.417 | 0           | 2.282973621 | spermatocyte   | SPATA8   |
| FOSB4    | 7.98E-137 | 0.921038711 | 0.805 | 0.336 | 4.90E-132   | 2.40E+00    | VSM_cells      | FOSB     |
| SPACA7   | 0         | 0.920627993 | 0.72  | 0.399 | 0           | 1.804511278 | spermatid      | SPACA7   |
| ROPN1L   | 0         | 0.920606621 | 0.995 | 0.743 | 0           | 1.339165545 | spermatocyte   | ROPN1L   |

|              |             |             |       |       |             |             |                |              |
|--------------|-------------|-------------|-------|-------|-------------|-------------|----------------|--------------|
| BCL11B       | 4.07E-43    | 0.920504982 | 0.263 | 0.013 | 2.50E-38    | 2.02E+01    | T_cells        | BCL11B       |
| RPS217       | 8.26E-112   | 0.920067737 | 0.894 | 0.674 | 5.07E-107   | 1.33E+00    | VSM_cells      | RPS2         |
| ELAVL2       | 0           | 0.919979276 | 0.496 | 0.238 | 0           | 2.084033613 | spermatogonia  | ELAVL2       |
| ROBO4        | 0           | 0.919977688 | 0.462 | 0.004 | 0           | 115.5       | endotheliocyte | ROBO4        |
| LAMA21       | 0           | 0.919708874 | 0.514 | 0.071 | 0           | 7.23943662  | PTM_cells      | LAMA2        |
| HLA-DRB5     | 2.30E-179   | 0.919640472 | 0.449 | 0.078 | 1.41E-174   | 5.76E+00    | endotheliocyte | HLA-DRB5     |
| CTC.441N14.4 | 0           | 0.9194187   | 0.329 | 0.083 | 0           | 3.963855422 | spermatid      | CTC.441N14.4 |
| LARP6        | 0           | 0.919203788 | 0.888 | 0.34  | 0           | 2.611764706 | spermatocyte   | LARP6        |
| SUB1         | 0           | 0.918755684 | 0.758 | 0.461 | 0           | 1.644251627 | spermatogonia  | SUB1         |
| ISOC2        | 0           | 0.918473368 | 0.725 | 0.188 | 0           | 3.856382979 | spermatocyte   | ISOC2        |
| CLIC1        | 2.63E-124   | 0.918383615 | 0.682 | 0.259 | 1.61E-119   | 2.63E+00    | endotheliocyte | CLIC1        |
| RUNX3        | 3.25E-33    | 0.918140821 | 0.316 | 0.024 | 2.00E-28    | 1.32E+01    | T_cells        | RUNX3        |
| CLEC5A       | 0           | 0.917998484 | 0.256 | 0.004 | 0           | 64          | macrophages    | CLEC5A       |
| HK1          | 0           | 0.91785772  | 0.683 | 0.285 | 0           | 2.396491228 | spermatid      | HK1          |
| RPL93        | 3.81E-125   | 0.917342134 | 0.928 | 0.874 | 2.34E-120   | 1.06E+00    | VSM_cells      | RPL9         |
| TIMD4        | 0           | 0.916956081 | 0.793 | 0.455 | 0           | 1.742857143 | spermatid      | TIMD4        |
| NACA4        | 1.26E-101   | 0.916670299 | 0.875 | 0.747 | 7.75E-97    | 1.17E+00    | VSM_cells      | NACA         |
| RPS4Y12      | 0           | 0.91618855  | 0.717 | 0.252 | 0           | 2.845238095 | PTM_cells      | RPS4Y1       |
| PLCZ1        | 0           | 0.915731101 | 0.703 | 0.34  | 0           | 2.067647059 | spermatid      | PLCZ1        |
| EGFL7        | 0           | 0.915725587 | 0.362 | 0.041 | 0           | 8.829268293 | spermatogonia  | EGFL7        |
| LRRD1        | 0           | 0.915576734 | 0.549 | 0.108 | 0           | 5.083333333 | spermatid      | LRRD1        |
| FAU3         | 2.51E-08    | 0.915391584 | 0.895 | 0.838 | 0.001540353 | 1.068019093 | T_cells        | FAU          |
| OAZ12        | 1.90E-06    | 0.915357228 | 0.737 | 0.617 | 0.116393152 | 1.194489465 | T_cells        | OAZ1         |
| FANCD2OS     | 0           | 0.915356606 | 0.694 | 0.32  | 0           | 2.16875     | spermatid      | FANCD2OS     |
| TGFBR31      | 5.14E-243   | 0.914994843 | 0.469 | 0.142 | 3.16E-238   | 3.30E+00    | Leydig_cells   | TGFBR3       |
| RABIF        | 0           | 0.914980318 | 0.721 | 0.543 | 0           | 1.327808471 | spermatid      | RABIF        |
| SQSTM1       | 7.66E-173   | 0.914965053 | 0.618 | 0.332 | 4.70E-168   | 1.86E+00    | Leydig_cells   | SQSTM1       |
| WFDC1        | 0           | 0.914935787 | 0.514 | 0.12  | 0           | 4.283333333 | PTM_cells      | WFDC1        |
| CDKL2        | 0           | 0.914815247 | 0.858 | 0.173 | 0           | 4.959537572 | spermatocyte   | CDKL2        |
| MXRA8        | 0           | 0.914739643 | 0.455 | 0.057 | 0           | 7.98245614  | Leydig_cells   | MXRA8        |
| RAB312       | 0           | 0.914573947 | 0.348 | 0.079 | 0           | 4.405063291 | Sertoli_cells  | RAB31        |
| CHODL        | 0           | 0.91442729  | 0.31  | 0.032 | 0           | 9.6875      | Sertoli_cells  | CHODL        |
| DLC1         | 2.59E-116   | 0.914262525 | 0.511 | 0.144 | 1.59E-111   | 3.55E+00    | endotheliocyte | DLC1         |
| DNAJC21      | 0           | 0.913971658 | 0.915 | 0.426 | 0           | 2.147887324 | spermatocyte   | DNAJC21      |
| RPL13AP252   | 1.89E-67    | 0.913781892 | 0.273 | 0.121 | 1.16E-62    | 2.26E+00    | Leydig_cells   | RPL13AP25    |
| BAG5         | 0           | 0.913570726 | 0.857 | 0.679 | 0           | 1.262150221 | spermatid      | BAG5         |
| PRAME        | 0           | 0.91349021  | 0.447 | 0.159 | 0           | 2.811320755 | spermatogonia  | PRAME        |
| TPTE         | 0           | 0.913324539 | 0.356 | 0.101 | 0           | 3.524752475 | spermatogonia  | TPTE         |
| PFN3         | 0           | 0.913238496 | 0.543 | 0.207 | 0           | 2.623188406 | spermatid      | PFN3         |
| MT-ND42      | 1.02E-90    | 0.913210578 | 0.61  | 0.411 | 6.27E-86    | 1.48E+00    | Leydig_cells   | MT-ND4       |
| GPNMB        | 0           | 0.913160617 | 0.431 | 0.06  | 0           | 7.183333333 | Leydig_cells   | GPNMB        |
| RPS5         | 1.33E-121   | 0.91312403  | 0.95  | 0.816 | 8.18E-117   | 1.16E+00    | endotheliocyte | RPS5         |
| HELLS        | 0           | 0.911926679 | 0.448 | 0.035 | 0           | 12.8        | spermatogonia  | HELLS        |
| TEKT5        | 0           | 0.911625604 | 0.556 | 0.182 | 0           | 3.054945055 | spermatid      | TEKT5        |
| RPL23AP42    | 1.14E-21    | 0.911605731 | 0.421 | 0.24  | 6.99E-17    | 1.75E+00    | macrophages    | RPL23AP42    |
| SUZ12        | 0           | 0.911431148 | 0.626 | 0.224 | 0           | 2.794642857 | spermatogonia  | SUZ12        |
| COX7A2L      | 0           | 0.911421157 | 0.704 | 0.329 | 0           | 2.139817629 | spermatogonia  | COX7A2L      |
| C12orf50     | 0           | 0.91133528  | 0.793 | 0.446 | 0           | 1.778026906 | spermatid      | C12orf50     |
| LITAF3       | 1.48E-07    | 0.911274537 | 0.316 | 0.092 | 0.009083979 | 3.434782609 | T_cells        | LITAF        |
| MGP3         | 4.68E-191   | 0.910895411 | 0.666 | 0.159 | 2.87E-186   | 4.19E+00    | VSM_cells      | MGP          |
| RPS73        | 6.11E-10    | 0.910827375 | 0.921 | 0.801 | 3.75E-05    | 1.15E+00    | T_cells        | RPS7         |
| GNAI21       | 2.15E-33    | 0.910751756 | 0.62  | 0.424 | 1.32E-28    | 1.46E+00    | macrophages    | GNAI2        |
| MT-ND46      | 5.54E-09    | 0.910441005 | 0.789 | 0.419 | 0.000339663 | 1.883054893 | T_cells        | MT-ND4       |
| RPL341       | 3.77E-62    | 0.910079758 | 0.956 | 0.905 | 2.31E-57    | 1.06E+00    | macrophages    | RPL34        |
| RPL53        | 1.91E-118   | 0.909927206 | 0.934 | 0.854 | 1.17E-113   | 1.09E+00    | VSM_cells      | RPL5         |
| RP5.1052M9.1 | 0.001806435 | 0.909882555 | 0.236 | 0.208 | 1           | 1.134615385 | endotheliocyte | RP5.1052M9.1 |
| SIRPD        | 0           | 0.909541591 | 0.629 | 0.221 | 0           | 2.846153846 | spermatid      | SIRPD        |
| NEU1         | 8.95E-09    | 0.909533661 | 0.237 | 0.047 | 0.000549203 | 5.042553191 | T_cells        | NEU1         |
| KLF10        | 8.53E-106   | 0.909520998 | 0.633 | 0.24  | 5.23E-101   | 2.64E+00    | endotheliocyte | KLF10        |
| SRGN2        | 5.16E-09    | 0.909395394 | 0.24  | 0.055 | 0.00031686  | 4.363636364 | mastocyte      | SRGN         |
| TRIM13       | 0           | 0.90938867  | 0.943 | 0.402 | 0           | 2.345771144 | spermatocyte   | TRIM13       |
| BTG25        | 1.70E-12    | 0.909266101 | 0.5   | 0.132 | 1.04E-07    | 3.79E+00    | T_cells        | BTG2         |
| XRCC6        | 0           | 0.909139547 | 0.83  | 0.525 | 0           | 1.580952381 | spermatogonia  | XRCC6        |
| IFI163       | 4.54E-08    | 0.908843468 | 0.316 | 0.085 | 0.002785031 | 3.717647059 | T_cells        | IFI16        |
| CD248        | 0           | 0.908781324 | 0.348 | 0.012 | 0           | 29          | Leydig_cells   | CD248        |
| HLA-A3       | 6.32E-233   | 0.90865431  | 0.624 | 0.293 | 3.88E-228   | 2.13E+00    | PTM_cells      | HLA-A        |
| EID1         | 3.01E-130   | 0.908508993 | 0.834 | 0.359 | 1.84E-125   | 2.32E+00    | endotheliocyte | EID1         |
| MEF2C1       | 1.61E-58    | 0.908498972 | 0.448 | 0.152 | 9.85E-54    | 2.95E+00    | macrophages    | MEF2C        |
| RPL143       | 5.18E-226   | 0.908212779 | 0.822 | 0.637 | 3.18E-221   | 1.29E+00    | PTM_cells      | RPL14        |
| GLIPR1L2     | 0           | 0.908150387 | 0.925 | 0.337 | 0           | 2.744807122 | spermatocyte   | GLIPR1L2     |
| AQP1         | 0           | 0.907957199 | 0.295 | 0.007 | 0           | 42.14285714 | endotheliocyte | AQP1         |
| GIMAP71      | 3.32E-33    | 0.907637939 | 0.237 | 0.013 | 2.04E-28    | 1.82E+01    | T_cells        | GIMAP7       |
| NDUFB112     | 3.06E-201   | 0.90720657  | 0.345 | 0.112 | 1.87E-196   | 3.08E+00    | Sertoli_cells  | NDUFB11      |
| RPL193       | 8.35E-106   | 0.907068273 | 0.915 | 0.838 | 5.12E-101   | 1.09E+00    | VSM_cells      | RPL19        |
| CCP110       | 0           | 0.906931053 | 0.526 | 0.152 | 0           | 3.460526316 | spermatogonia  | CCP110       |

|            |           |             |       |       |             |             |                |            |
|------------|-----------|-------------|-------|-------|-------------|-------------|----------------|------------|
| PSMB81     | 3.23E-32  | 0.906847162 | 0.395 | 0.037 | 1.98E-27    | 1.07E+01    | T_cells        | PSMB8      |
| SYNE11     | 4.86E-170 | 0.90646165  | 0.524 | 0.124 | 2.98E-165   | 4.23E+00    | VSM_cells      | SYNE1      |
| RPS211     | 1.78E-112 | 0.906378764 | 0.891 | 0.52  | 1.09E-107   | 1.71E+00    | endotheliocyte | RPS21      |
| HCFC1R11   | 9.25E-173 | 0.905902646 | 0.577 | 0.15  | 5.67E-168   | 3.85E+00    | VSM_cells      | HCFC1R1    |
| PCCB       | 0         | 0.905871816 | 0.552 | 0.197 | 0           | 2.802030457 | spermatid      | PCCB       |
| ARHGAP28   | 0         | 0.905240768 | 0.729 | 0.389 | 0           | 1.87403599  | spermatid      | ARHGAP28   |
| ATP1A2     | 0         | 0.904512986 | 0.463 | 0.022 | 0           | 21.04545455 | VSM_cells      | ATP1A2     |
| KCNMB1     | 0         | 0.904346993 | 0.486 | 0.016 | 0           | 30.375      | PTM_cells      | KCNMB1     |
| NFIB2      | 0         | 0.904169963 | 0.552 | 0.067 | 0           | 8.23880597  | VSM_cells      | NFIB       |
| HSPA2      | 0         | 0.904043685 | 0.605 | 0.418 | 0           | 1.447368421 | spermatogonia  | HSPA2      |
| RPS4Y11    | 1.01E-269 | 0.903784214 | 0.687 | 0.256 | 6.18E-265   | 2.68E+00    | Leydig_cells   | RPS4Y1     |
| C9orf9     | 1.91E-160 | 0.903757042 | 0.455 | 0.416 | 1.17E-155   | 1.09E+00    | spermatid      | C9orf9     |
| CETN3      | 0         | 0.903486502 | 0.586 | 0.336 | 0           | 1.744047619 | spermatogonia  | CETN3      |
| ISG20      | 6.81E-06  | 0.903036814 | 0.316 | 0.115 | 0.417861698 | 2.747826087 | T_cells        | ISG20      |
| F101       | 0         | 0.90273017  | 0.526 | 0.05  | 0           | 10.52       | PTM_cells      | F10        |
| SIGLEC1    | 0         | 0.902712278 | 0.212 | 0.002 | 0           | 106         | macrophages    | SIGLEC1    |
| CEBPD4     | 1.93E-180 | 0.902641296 | 0.52  | 0.106 | 1.18E-175   | 4.91E+00    | VSM_cells      | CEBPD      |
| IFITM31    | 1.49E-89  | 0.902337062 | 0.653 | 0.193 | 9.12E-85    | 3.38E+00    | macrophages    | IFITM3     |
| IL10RA1    | 5.04E-100 | 0.902095526 | 0.263 | 0.005 | 3.09E-95    | 5.26E+01    | T_cells        | IL10RA     |
| CSRNP1     | 2.58E-114 | 0.90201515  | 0.578 | 0.178 | 1.58E-109   | 3.25E+00    | endotheliocyte | CSRNP1     |
| YBEY       | 0         | 0.901829637 | 0.948 | 0.409 | 0           | 2.317848411 | spermatocyte   | YBEY       |
| PDLIM7     | 0         | 0.901764258 | 0.582 | 0.138 | 0           | 4.217391304 | PTM_cells      | PDLIM7     |
| CLEC4E     | 0         | 0.901577996 | 0.232 | 0.003 | 0           | 77.33333333 | macrophages    | CLEC4E     |
| SLC25A63   | 0         | 0.901283843 | 0.637 | 0.174 | 0           | 3.66091954  | PTM_cells      | SLC25A6    |
| CHPF       | 0         | 0.901069406 | 0.319 | 0.061 | 0           | 5.229508197 | Sertoli_cells  | CHPF       |
| C7orf31    | 0         | 0.901052049 | 0.687 | 0.438 | 0           | 1.568493151 | spermatid      | C7orf31    |
| CUL9       | 0         | 0.900943078 | 0.636 | 0.274 | 0           | 2.321167883 | spermatid      | CUL9       |
| TLE4       | 0         | 0.900874171 | 0.771 | 0.508 | 0           | 1.517716535 | spermatid      | TLE4       |
| LRR1       | 0         | 0.900646753 | 0.905 | 0.262 | 0           | 3.454198473 | spermatocyte   | LRR1       |
| PCYOX1     | 0         | 0.900586035 | 0.465 | 0.107 | 0           | 4.345794393 | Leydig_cells   | PCYOX1     |
| HSPA6      | 1.73E-79  | 0.900553595 | 0.219 | 0.03  | 1.06E-74    | 7.30E+00    | macrophages    | HSPA6      |
| DBI        | 0         | 0.900092658 | 0.974 | 0.564 | 0           | 1.726950355 | spermatocyte   | DBI        |
| COL18A11   | 0         | 0.899732359 | 0.547 | 0.06  | 0           | 9.116666667 | PTM_cells      | COL18A1    |
| IFI62      | 0         | 0.899491851 | 0.419 | 0.083 | 0           | 5.048192771 | Leydig_cells   | IFI6       |
| ACTN12     | 6.26E-121 | 0.899393142 | 0.624 | 0.244 | 3.84E-116   | 2.56E+00    | VSM_cells      | ACTN1      |
| IQCF6      | 0         | 0.899242864 | 0.487 | 0.121 | 0           | 4.024793388 | spermatid      | IQCF6      |
| RPS283     | 1.06E-103 | 0.899056016 | 0.86  | 0.606 | 6.52E-99    | 1.42E+00    | VSM_cells      | RPS28      |
| MBOAT7     | 0         | 0.89884709  | 0.326 | 0.053 | 0           | 6.150943396 | Sertoli_cells  | MBOAT7     |
| SWAP70     | 0         | 0.898545912 | 0.504 | 0.052 | 0           | 9.692307692 | endotheliocyte | SWAP70     |
| CFAP206    | 0         | 0.898384188 | 0.944 | 0.284 | 0           | 3.323943662 | spermatocyte   | CFAP206    |
| HES11      | 2.30E-255 | 0.898096454 | 0.499 | 0.074 | 1.41E-250   | 6.74E+00    | VSM_cells      | HES1       |
| RPS33      | 3.16E-287 | 0.897782501 | 0.898 | 0.795 | 1.94E-282   | 1.13E+00    | PTM_cells      | RPS3       |
| CFLAR      | 5.98E-87  | 0.897369713 | 0.6   | 0.261 | 3.67E-82    | 2.30E+00    | endotheliocyte | CFLAR      |
| RARRES21   | 0         | 0.897084212 | 0.541 | 0.063 | 0           | 8.587301587 | PTM_cells      | RARRES2    |
| PARK7      | 0         | 0.89690612  | 0.785 | 0.408 | 0           | 1.924019608 | spermatogonia  | PARK7      |
| RPL324     | 6.09E-11  | 0.896853629 | 0.947 | 0.889 | 3.74E-06    | 1.07E+00    | T_cells        | RPL32      |
| SLC38A21   | 0         | 0.896713356 | 0.473 | 0.102 | 0           | 4.637254902 | Leydig_cells   | SLC38A2    |
| ZFAND3     | 0         | 0.896628188 | 0.74  | 0.523 | 0           | 1.414913958 | spermatid      | ZFAND3     |
| CCNH       | 0         | 0.896579756 | 0.934 | 0.33  | 0           | 2.83030303  | spermatocyte   | CCNH       |
| IQCF4      | 0         | 0.896313085 | 0.351 | 0.108 | 0           | 3.25        | spermatid      | IQCF4      |
| ANKEF1     | 0         | 0.896311869 | 0.604 | 0.167 | 0           | 3.616766467 | spermatid      | ANKEF1     |
| RPL375     | 3.52E-11  | 0.896273531 | 0.895 | 0.806 | 2.16E-06    | 1.11E+00    | T_cells        | RPL37      |
| PLP21      | 2.91E-09  | 0.896085767 | 0.342 | 0.09  | 0.000178437 | 3.8         | T_cells        | PLP2       |
| EPB41L3    | 0         | 0.896085261 | 0.641 | 0.225 | 0           | 2.848888889 | spermatid      | EPB41L3    |
| HSPA1B5    | 1.43E-86  | 0.895863865 | 0.342 | 0.186 | 8.78E-82    | 1.84E+00    | Sertoli_cells  | HSPA1B     |
| PLS31      | 6.56E-285 | 0.895757529 | 0.516 | 0.073 | 4.02E-280   | 7.07E+00    | VSM_cells      | PLS3       |
| RPL264     | 3.85E-111 | 0.895222795 | 0.915 | 0.753 | 2.36E-106   | 1.22E+00    | VSM_cells      | RPL26      |
| RPS23P8    | 1.21E-19  | 0.895085306 | 0.387 | 0.222 | 7.45E-15    | 1.74E+00    | macrophages    | RPS23P8    |
| MXRA81     | 0         | 0.894945752 | 0.529 | 0.051 | 0           | 10.37254902 | PTM_cells      | MXRA8      |
| YEATS4     | 0         | 0.894077488 | 0.578 | 0.216 | 0           | 2.675925926 | spermatogonia  | YEATS4     |
| HSPB61     | 0         | 0.894067018 | 0.602 | 0.185 | 0           | 3.254054054 | PTM_cells      | HSPB6      |
| CLIC14     | 4.63E-105 | 0.89399073  | 0.607 | 0.259 | 2.84E-100   | 2.34E+00    | VSM_cells      | CLIC1      |
| PDE5A      | 0         | 0.893955252 | 0.517 | 0.102 | 0           | 5.068627451 | PTM_cells      | PDE5A      |
| RPL27A1    | 3.96E-61  | 0.893838275 | 0.892 | 0.786 | 2.43E-56    | 1.13E+00    | macrophages    | RPL27A     |
| CD1C       | 2.53E-67  | 0.893392845 | 0.158 | 0.019 | 1.55E-62    | 8.32E+00    | macrophages    | CD1C       |
| RPL23A     | 2.17E-94  | 0.893358467 | 0.908 | 0.735 | 1.33E-89    | 1.24E+00    | endotheliocyte | RPL23A     |
| AC002467.7 | 0         | 0.893231667 | 0.823 | 0.213 | 0           | 3.863849765 | spermatocyte   | AC002467.7 |
| RPS183     | 0         | 0.893220307 | 0.962 | 0.848 | 0           | 1.134433962 | PTM_cells      | RPS18      |
| DUSP21     | 0         | 0.89314508  | 0.249 | 0.038 | 0           | 6.552631579 | Sertoli_cells  | DUSP2      |
| SYCP2      | 0         | 0.892699932 | 0.64  | 0.425 | 0           | 1.505882353 | spermatogonia  | SYCP2      |
| HDAC2      | 0         | 0.892633439 | 0.705 | 0.372 | 0           | 1.89516129  | spermatogonia  | HDAC2      |
| NFKBIA4    | 3.91E-165 | 0.89196007  | 0.696 | 0.206 | 2.40E-160   | 3.38E+00    | VSM_cells      | NFKBIA     |
| C15orf61   | 0         | 0.891737296 | 0.902 | 0.351 | 0           | 2.56980057  | spermatocyte   | C15orf61   |
| MOSPD3     | 0         | 0.891642007 | 0.697 | 0.354 | 0           | 1.968926554 | spermatid      | MOSPD3     |
| SERPINI1   | 0         | 0.891335142 | 0.446 | 0.047 | 0           | 9.489361702 | VSM_cells      | SERPINI1   |

|                |           |             |       |       |             |             |                |                |
|----------------|-----------|-------------|-------|-------|-------------|-------------|----------------|----------------|
| RPS175         | 6.08E-06  | 0.891113271 | 0.711 | 0.474 | 0.372785269 | 1.5         | T_cells        | RPS17          |
| PLAU           | 0         | 0.891080761 | 0.259 | 0.002 | 0           | 129.5       | macrophages    | PLAU           |
| C19orf70       | 0         | 0.891055644 | 0.754 | 0.56  | 0           | 1.346428571 | spermatid      | C19orf70       |
| VCL            | 7.57E-203 | 0.891038911 | 0.562 | 0.122 | 4.64E-198   | 4.61E+00    | VSM_cells      | VCL            |
| RPS27A3        | 5.64E-306 | 0.890742766 | 0.933 | 0.857 | 3.46E-301   | 1.09E+00    | PTM_cells      | RPS27A         |
| EEF1D          | 4.52E-92  | 0.890700081 | 0.868 | 0.626 | 2.77E-87    | 1.39E+00    | endotheliocyte | EEF1D          |
| ID4            | 0         | 0.890415337 | 0.362 | 0.081 | 0           | 4.469135802 | Sertoli_cells  | ID4            |
| FSCN1          | 0         | 0.890367753 | 0.335 | 0.061 | 0           | 5.491803279 | Sertoli_cells  | FSCN1          |
| ELF13          | 3.49E-07  | 0.890277293 | 0.342 | 0.112 | 0.021412223 | 3.053571429 | T_cells        | ELF1           |
| ATF7IP2        | 2.86E-85  | 0.890118481 | 0.471 | 0.354 | 1.76E-80    | 1.33E+00    | Sertoli_cells  | ATF7IP2        |
| NFE2L21        | 7.33E-155 | 0.889853978 | 0.645 | 0.41  | 4.50E-150   | 1.57E+00    | Leydig_cells   | NFE2L2         |
| FOS5           | 5.76E-08  | 0.889716668 | 0.658 | 0.313 | 0.003532983 | 2.102236422 | T_cells        | FOS            |
| ICAM2          | 0         | 0.889616374 | 0.385 | 0.003 | 0           | 128.3333333 | endotheliocyte | ICAM2          |
| LMNA3          | 4.28E-257 | 0.888769839 | 0.7   | 0.355 | 2.63E-252   | 1.97E+00    | PTM_cells      | LMNA           |
| TMEM191B       | 0         | 0.888223313 | 0.525 | 0.217 | 0           | 2.419354839 | spermatid      | TMEM191B       |
| PROK1          | 7.96E-173 | 0.887936757 | 0.281 | 0.066 | 4.88E-168   | 4.26E+00    | Leydig_cells   | PROK1          |
| ACTN11         | 0         | 0.887912289 | 0.613 | 0.232 | 0           | 2.642241379 | PTM_cells      | ACTN1          |
| FAM213A        | 7.87E-140 | 0.887864577 | 0.405 | 0.203 | 4.83E-135   | 2.00E+00    | Sertoli_cells  | FAM213A        |
| SLC25A34       | 3.85E-96  | 0.887420363 | 0.748 | 0.434 | 2.36E-91    | 1.72E+00    | VSM_cells      | SLC25A3        |
| NACA2          | 0         | 0.887246567 | 0.91  | 0.335 | 0           | 2.71641791  | spermatocyte   | NACA2          |
| RP11-1223D19.1 | 0         | 0.887175659 | 0.565 | 0.251 | 0           | 2.250996016 | spermatocyte   | RP11-1223D19.1 |
| NDRG4          | 0         | 0.88709869  | 0.321 | 0.06  | 0           | 5.35        | Sertoli_cells  | NDRG4          |
| TEX29          | 0         | 0.886978964 | 0.498 | 0.189 | 0           | 2.634920635 | spermatid      | TEX29          |
| PDCL2          | 0         | 0.885970716 | 0.669 | 0.374 | 0           | 1.788770053 | spermatid      | PDCL2          |
| C20orf173      | 0         | 0.885810442 | 0.539 | 0.138 | 0           | 3.905797101 | spermatid      | C20orf173      |
| RP11-705C15.4  | 0         | 0.885753386 | 0.552 | 0.177 | 0           | 3.118644068 | spermatocyte   | RP11-705C15.4  |
| ARID5B1        | 1.96E-175 | 0.885736731 | 0.539 | 0.126 | 1.20E-170   | 4.28E+00    | VSM_cells      | ARID5B         |
| TUBA1A4        | 4.73E-159 | 0.885655628 | 0.677 | 0.196 | 2.90E-154   | 3.45E+00    | VSM_cells      | TUBA1A         |
| CEP112         | 0         | 0.885555034 | 0.734 | 0.439 | 0           | 1.671981777 | spermatid      | CEP112         |
| TSC22D34       | 1.45E-167 | 0.885513232 | 0.56  | 0.14  | 8.91E-163   | 4.00E+00    | VSM_cells      | TSC22D3        |
| MAFF1          | 1.52E-70  | 0.88546664  | 0.316 | 0.066 | 9.34E-66    | 4.79E+00    | macrophages    | MAFF           |
| CCNL14         | 1.06E-80  | 0.885237008 | 0.649 | 0.342 | 6.49E-76    | 1.90E+00    | VSM_cells      | CCNL1          |
| IER5           | 9.24E-150 | 0.884939311 | 0.551 | 0.13  | 5.67E-145   | 4.24E+00    | endotheliocyte | IER5           |
| FTH1P101       | 2.80E-56  | 0.88486984  | 0.302 | 0.156 | 1.72E-51    | 1.94E+00    | Leydig_cells   | FTH1P10        |
| HTRA11         | 0         | 0.884495762 | 0.505 | 0.04  | 0           | 12.625      | PTM_cells      | HTRA1          |
| RBBP71         | 5.11E-162 | 0.884436029 | 0.465 | 0.232 | 3.13E-157   | 2.00E+00    | Sertoli_cells  | RBBP7          |
| RNF130         | 2.45E-58  | 0.884341022 | 0.421 | 0.136 | 1.50E-53    | 3.10E+00    | macrophages    | RNF130         |
| FAM198B        | 1.10E-244 | 0.884210334 | 0.452 | 0.056 | 6.73E-240   | 8.07E+00    | endotheliocyte | FAM198B        |
| AKAP12         | 0         | 0.884197387 | 0.903 | 0.438 | 0           | 2.061643836 | spermatocyte   | AKAP12         |
| LAMTOR5        | 0         | 0.883906598 | 0.684 | 0.401 | 0           | 1.705735661 | spermatogonia  | LAMTOR5        |
| RPL225         | 2.00E-08  | 0.883853915 | 0.816 | 0.649 | 0.0012264   | 1.257318952 | T_cells        | RPL22          |
| AOC3           | 0         | 0.883801909 | 0.478 | 0.037 | 0           | 12.91891892 | VSM_cells      | AOC3           |
| ACRBP          | 0         | 0.883702945 | 0.992 | 0.55  | 0           | 1.803636364 | spermatocyte   | ACRBP          |
| MT-ND5         | 3.58E-78  | 0.883451712 | 0.68  | 0.292 | 2.20E-73    | 2.33E+00    | endotheliocyte | MT-ND5         |
| LRP12          | 0         | 0.883448602 | 0.557 | 0.061 | 0           | 9.131147541 | PTM_cells      | LRP1           |
| PRMT12         | 1.37E-138 | 0.88326207  | 0.43  | 0.216 | 8.42E-134   | 1.99E+00    | Sertoli_cells  | PRMT1          |
| MYADM          | 1.09E-29  | 0.883199856 | 0.438 | 0.222 | 6.69E-25    | 1.97E+00    | macrophages    | MYADM          |
| RPL134         | 8.83E-12  | 0.882811779 | 0.947 | 0.956 | 5.42E-07    | 9.91E-01    | T_cells        | RPL13          |
| C22orf23       | 0         | 0.882774703 | 0.924 | 0.332 | 0           | 2.78313253  | spermatocyte   | C22orf23       |
| CSTB2          | 5.74E-160 | 0.882688042 | 0.389 | 0.161 | 3.52E-155   | 2.42E+00    | Sertoli_cells  | CSTB           |
| RPL18A2        | 2.29E-41  | 0.882500959 | 0.721 | 0.415 | 1.41E-36    | 1.74E+00    | macrophages    | RPL18A         |
| SAT2           | 5.58E-147 | 0.882441435 | 0.347 | 0.146 | 3.42E-142   | 2.38E+00    | Sertoli_cells  | SAT2           |
| IER25          | 1.26E-15  | 0.881742107 | 0.658 | 0.179 | 7.71E-11    | 3.68E+00    | T_cells        | IER2           |
| SUN5           | 0         | 0.88165524  | 0.533 | 0.221 | 0           | 2.411764706 | spermatid      | SUN5           |
| C16orf78       | 0         | 0.881652783 | 0.537 | 0.097 | 0           | 5.536082474 | spermatid      | C16orf78       |
| CMAS1          | 3.07E-110 | 0.881505765 | 0.476 | 0.316 | 1.88E-105   | 1.51E+00    | Sertoli_cells  | CMAS           |
| RPS16          | 3.18E-111 | 0.881008542 | 0.938 | 0.755 | 1.95E-106   | 1.24E+00    | endotheliocyte | RPS16          |
| PCAT6          | 0         | 0.880989744 | 0.645 | 0.369 | 0           | 1.74796748  | spermatid      | PCAT6          |
| ARGLU11        | 3.54E-81  | 0.880917451 | 0.727 | 0.416 | 2.17E-76    | 1.75E+00    | endotheliocyte | ARGLU1         |
| MRPL34         | 0         | 0.880547814 | 0.79  | 0.282 | 0           | 2.80141844  | spermatocyte   | MRPL34         |
| IQGAP1         | 5.78E-140 | 0.880537433 | 0.608 | 0.167 | 3.55E-135   | 3.64E+00    | endotheliocyte | IQGAP1         |
| FBLIM1         | 0         | 0.880004308 | 0.501 | 0.029 | 0           | 17.27586207 | PTM_cells      | FBLIM1         |
| PFDN2          | 0         | 0.879957009 | 0.602 | 0.281 | 0           | 2.142348754 | spermatogonia  | PFDN2          |
| PDGFA          | 0         | 0.879925388 | 0.444 | 0.017 | 0           | 26.11764706 | VSM_cells      | PDGFA          |
| CD635          | 6.42E-205 | 0.879747007 | 0.569 | 0.274 | 3.94E-200   | 2.08E+00    | Sertoli_cells  | CD63           |
| C1R1           | 0         | 0.879202391 | 0.585 | 0.064 | 0           | 9.140625    | PTM_cells      | C1R            |
| H2AFZ          | 0         | 0.879043527 | 0.738 | 0.448 | 0           | 1.647321429 | spermatogonia  | H2AFZ          |
| WDR87          | 0         | 0.87873057  | 0.685 | 0.192 | 0           | 3.567708333 | spermatocyte   | WDR87          |
| LTBP11         | 0         | 0.877889093 | 0.529 | 0.085 | 0           | 6.223529412 | PTM_cells      | LTBP1          |
| MRPL47         | 0         | 0.877596887 | 0.937 | 0.415 | 0           | 2.257831325 | spermatocyte   | MRPL47         |
| RPL13A1        | 3.04E-69  | 0.877516027 | 0.933 | 0.736 | 1.86E-64    | 1.27E+00    | macrophages    | RPL13A         |
| RARRES3        | 6.58E-29  | 0.877484355 | 0.289 | 0.023 | 4.03E-24    | 1.26E+01    | T_cells        | RARRES3        |
| KDEL2          | 0         | 0.877311477 | 0.963 | 0.55  | 0           | 1.750909091 | spermatocyte   | KDEL2          |
| RPL28          | 5.53E-113 | 0.877239278 | 0.96  | 0.821 | 3.39E-108   | 1.17E+00    | endotheliocyte | RPL28          |
| YBX3           | 0         | 0.877222749 | 0.994 | 0.749 | 0           | 1.327102804 | spermatocyte   | YBX3           |

|              |             |             |       |       |             |             |                |              |
|--------------|-------------|-------------|-------|-------|-------------|-------------|----------------|--------------|
| RPL35        | 0           | 0.877193647 | 0.969 | 0.921 | 0           | 1.052117264 | PTM_cells      | RPL3         |
| LAPTM4B      | 1.57E-236   | 0.876978105 | 0.353 | 0.107 | 9.64E-232   | 3.30E+00    | Sertoli_cells  | LAPTM4B      |
| ATF33        | 0           | 0.876388562 | 0.504 | 0.1   | 0           | 5.04        | PTM_cells      | ATF3         |
| ZNRF4        | 0           | 0.876047219 | 0.715 | 0.329 | 0           | 2.17325228  | spermatid      | ZNRF4        |
| TSSK3        | 0           | 0.876044176 | 0.616 | 0.249 | 0           | 2.473895582 | spermatid      | TSSK3        |
| S100A61      | 2.30E-83    | 0.875946829 | 0.515 | 0.129 | 1.41E-78    | 3.99E+00    | macrophages    | S100A6       |
| SYNE21       | 6.83E-155   | 0.87553788  | 0.533 | 0.128 | 4.19E-150   | 4.16E+00    | VSM_cells      | SYNE2        |
| CORO1A       | 0           | 0.87539047  | 0.296 | 0.003 | 0           | 98.66666667 | macrophages    | CORO1A       |
| TTLL2        | 0           | 0.875281185 | 0.528 | 0.101 | 0           | 5.227722772 | spermatid      | TTLL2        |
| DDIT41       | 6.74E-57    | 0.875146656 | 0.333 | 0.085 | 4.13E-52    | 3.92E+00    | macrophages    | DDIT4        |
| C1orf158     | 0           | 0.875072676 | 0.93  | 0.278 | 0           | 3.345323741 | spermatocyte   | C1orf158     |
| BZW1         | 0           | 0.874912629 | 0.852 | 0.742 | 0           | 1.148247978 | spermatid      | BZW1         |
| SETX         | 0           | 0.874843621 | 0.588 | 0.277 | 0           | 2.122743682 | spermatogonia  | SETX         |
| SNX6         | 0           | 0.874553725 | 0.615 | 0.133 | 0           | 4.62406015  | spermatogonia  | SNX6         |
| SPACA4       | 0           | 0.87451767  | 0.663 | 0.356 | 0           | 1.862359551 | spermatid      | SPACA4       |
| CCDC85B1     | 0           | 0.874498744 | 0.574 | 0.102 | 0           | 5.62745098  | PTM_cells      | CCDC85B      |
| SAT13        | 1.32E-09    | 0.873890735 | 0.5   | 0.157 | 8.10E-05    | 3.18E+00    | T_cells        | SAT1         |
| TKTL2        | 0           | 0.87376158  | 0.853 | 0.216 | 0           | 3.949074074 | spermatocyte   | TKTL2        |
| MT.RNR2      | 2.47E-60    | 0.873494776 | 0.392 | 0.369 | 1.52E-55    | 1.06E+00    | spermatogonia  | MT.RNR2      |
| HLA-DPB12    | 7.55E-15    | 0.87347845  | 0.263 | 0.035 | 4.63E-10    | 7.51E+00    | T_cells        | HLA-DPB1     |
| APOBEC3C     | 0           | 0.873276937 | 0.324 | 0.039 | 0           | 8.307692308 | Sertoli_cells  | APOBEC3C     |
| CEP295NL     | 0           | 0.873202946 | 0.612 | 0.21  | 0           | 2.914285714 | spermatid      | CEP295NL     |
| MEF2A        | 5.77E-32    | 0.873144493 | 0.401 | 0.186 | 3.54E-27    | 2.16E+00    | macrophages    | MEF2A        |
| ALDH1A1      | 0           | 0.873092862 | 0.587 | 0.11  | 0           | 5.336363636 | Leydig_cells   | ALDH1A1      |
| MT.ND3       | 3.39E-60    | 0.872872946 | 0.391 | 0.365 | 2.08E-55    | 1.07E+00    | spermatogonia  | MT.ND3       |
| SH3BGRL3     | 5.41E-126   | 0.872373035 | 0.625 | 0.208 | 3.32E-121   | 3.00E+00    | endotheliocyte | SH3BGRL3     |
| INSR         | 0           | 0.872313617 | 0.494 | 0.079 | 0           | 6.253164557 | PTM_cells      | INSR         |
| ROCK1        | 1.14E-78    | 0.872205799 | 0.715 | 0.452 | 6.98E-74    | 1.58E+00    | VSM_cells      | ROCK1        |
| RNF32        | 0           | 0.872111623 | 0.964 | 0.432 | 0           | 2.231481481 | spermatocyte   | RNF32        |
| LEPROT       | 6.89E-155   | 0.87158714  | 0.628 | 0.167 | 4.23E-150   | 3.76E+00    | endotheliocyte | LEPROT       |
| DRICH1       | 0           | 0.8713128   | 0.645 | 0.23  | 0           | 2.804347826 | spermatid      | DRICH1       |
| ID2          | 2.82E-297   | 0.871214254 | 0.464 | 0.111 | 1.73E-292   | 4.18E+00    | Leydig_cells   | ID2          |
| PDGFB        | 9.80E-180   | 0.871009126 | 0.273 | 0.021 | 6.01E-175   | 1.30E+01    | macrophages    | PDGFB        |
| RPS11        | 7.56E-130   | 0.870951606 | 0.96  | 0.82  | 4.64E-125   | 1.17E+00    | endotheliocyte | RPS11        |
| MEX3B        | 0           | 0.870875401 | 0.581 | 0.192 | 0           | 3.026041667 | spermatid      | MEX3B        |
| WDR53        | 0           | 0.870831758 | 0.942 | 0.354 | 0           | 2.661016949 | spermatocyte   | WDR53        |
| COX7A11      | 0           | 0.870825949 | 0.502 | 0.062 | 0           | 8.096774194 | PTM_cells      | COX7A1       |
| HLTF         | 0           | 0.870728349 | 0.601 | 0.129 | 0           | 4.658914729 | spermatogonia  | HLTF         |
| SPOCK2       | 0           | 0.870546585 | 0.295 | 0.058 | 0           | 5.086206897 | Sertoli_cells  | SPOCK2       |
| RP11.496H1.2 | 2.72E-261   | 0.870115618 | 0.408 | 0.252 | 1.67E-256   | 1.62E+00    | spermatid      | RP11.496H1.2 |
| SDF2L1       | 0           | 0.87006609  | 0.525 | 0.275 | 0           | 1.909090909 | spermatogonia  | SDF2L1       |
| AK1          | 5.25E-208   | 0.870051816 | 0.629 | 0.307 | 3.22E-203   | 2.05E+00    | PTM_cells      | AK1          |
| RPS234       | 5.89E-104   | 0.8699082   | 0.918 | 0.828 | 3.61E-99    | 1.11E+00    | VSM_cells      | RPS23        |
| RPS35        | 4.47E-292   | 0.869795005 | 0.857 | 0.796 | 2.74E-287   | 1.08E+00    | Sertoli_cells  | RPS3         |
| RPL36A5      | 4.45E-09    | 0.869706532 | 0.447 | 0.14  | 0.000272971 | 3.192857143 | T_cells        | RPL36A       |
| HSP90B1      | 0           | 0.869247829 | 0.709 | 0.579 | 0           | 1.224525043 | spermatogonia  | HSP90B1      |
| IQCB1        | 0           | 0.869142247 | 0.536 | 0.085 | 0           | 6.305882353 | spermatogonia  | IQCB1        |
| RPS13        | 1.59E-107   | 0.868995796 | 0.945 | 0.84  | 9.76E-103   | 1.13E+00    | endotheliocyte | RPS13        |
| HNRNPR       | 0           | 0.868944214 | 0.646 | 0.21  | 0           | 3.076190476 | spermatogonia  | HNRNPR       |
| MFAP5        | 0           | 0.868843515 | 0.2   | 0.003 | 0           | 66.66666667 | Leydig_cells   | MFAP5        |
| MT-CO22      | 9.03E-236   | 0.868839134 | 0.79  | 0.418 | 5.54E-231   | 1.89E+00    | PTM_cells      | MT-CO2       |
| NDRG3        | 0           | 0.868766221 | 0.687 | 0.384 | 0           | 1.7890625   | spermatid      | NDRG3        |
| ZCCHC171     | 1.06E-86    | 0.868709742 | 0.49  | 0.374 | 6.53E-82    | 1.31E+00    | Sertoli_cells  | ZCCHC17      |
| LSP11        | 0           | 0.868268691 | 0.367 | 0.017 | 0           | 21.58823529 | Leydig_cells   | LSP1         |
| TMPRSS12     | 0           | 0.868220982 | 0.8   | 0.146 | 0           | 5.479452055 | spermatocyte   | TMPRSS12     |
| IQCF5        | 0           | 0.868212383 | 0.712 | 0.369 | 0           | 1.929539295 | spermatid      | IQCF5        |
| LINC01191    | 0           | 0.868186367 | 0.918 | 0.488 | 0           | 1.881147541 | spermatocyte   | LINC01191    |
| COX7B2       | 0           | 0.868099423 | 0.88  | 0.373 | 0           | 2.35924933  | spermatocyte   | COX7B2       |
| NACA3        | 2.80E-221   | 0.868014664 | 0.866 | 0.743 | 1.72E-216   | 1.17E+00    | PTM_cells      | NACA         |
| OSBPL10      | 0           | 0.867692161 | 0.604 | 0.184 | 0           | 3.282608696 | spermatid      | OSBPL10      |
| RPS152       | 1.91E-252   | 0.86751483  | 0.898 | 0.76  | 1.17E-247   | 1.18E+00    | PTM_cells      | RPS15        |
| CCDC188      | 0           | 0.867472588 | 0.56  | 0.138 | 0           | 4.057971014 | spermatid      | CCDC188      |
| SNRPD1       | 0           | 0.86697227  | 0.659 | 0.271 | 0           | 2.431734317 | spermatogonia  | SNRPD1       |
| DNAJB7       | 0           | 0.866860013 | 0.509 | 0.113 | 0           | 4.504424779 | spermatid      | DNAJB7       |
| CD341        | 0           | 0.866783498 | 0.429 | 0.052 | 0           | 8.25        | Leydig_cells   | CD34         |
| TSHZ1        | 0           | 0.866475723 | 0.49  | 0.031 | 0           | 15.80645161 | PTM_cells      | TSHZ1        |
| GLTSCR2      | 1.39E-78    | 0.866343002 | 0.774 | 0.518 | 8.52E-74    | 1.49E+00    | endotheliocyte | GLTSCR2      |
| AKAP131      | 0.001093929 | 0.866245699 | 0.526 | 0.411 | 1           | 1.279805353 | T_cells        | AKAP13       |
| CD63         | 1.88E-148   | 0.866142317 | 0.839 | 0.285 | 1.15E-143   | 2.94E+00    | endotheliocyte | CD63         |
| NSUN4        | 0           | 0.866054676 | 0.606 | 0.229 | 0           | 2.64628821  | spermatid      | NSUN4        |
| UBTD2        | 0           | 0.865629    | 0.598 | 0.241 | 0           | 2.481327801 | spermatid      | UBTD2        |
| TEX33        | 0           | 0.865490709 | 0.667 | 0.33  | 0           | 2.021212121 | spermatid      | TEX33        |
| COL5A1       | 0           | 0.865155493 | 0.346 | 0.032 | 0           | 10.8125     | Leydig_cells   | COL5A1       |
| TUBA1A3      | 0           | 0.864998116 | 0.599 | 0.184 | 0           | 3.255434783 | PTM_cells      | TUBA1A       |
| TMEM173      | 0           | 0.864859436 | 0.499 | 0.032 | 0           | 15.59375    | endotheliocyte | TMEM173      |



|           |             |             |       |       |             |              |                |           |
|-----------|-------------|-------------|-------|-------|-------------|--------------|----------------|-----------|
| LIMS2     | 0           | 0.86472574  | 0.506 | 0.025 | 0           | 20.24        | endotheliocyte | LIMS2     |
| PDGFRB1   | 0           | 0.864665909 | 0.503 | 0.063 | 0           | 7.984126984  | PTM_cells      | PDGFRB    |
| SOCS31    | 2.68E-90    | 0.864559193 | 0.502 | 0.122 | 1.65E-85    | 4.11E+00     | macrophages    | SOCS3     |
| GRASP1    | 5.47E-150   | 0.86383136  | 0.242 | 0.02  | 3.36E-145   | 1.21E+01     | macrophages    | GRASP     |
| C2orf40   | 0           | 0.863465184 | 0.642 | 0.372 | 0           | 1.725806452  | spermatid      | C2orf40   |
| RPS162    | 2.87E-244   | 0.863451483 | 0.914 | 0.75  | 1.76E-239   | 1.22E+00     | Leydig_cells   | RPS16     |
| EMP21     | 1.78E-229   | 0.863159866 | 0.515 | 0.176 | 1.09E-224   | 2.93E+00     | Leydig_cells   | EMP2      |
| SRPK2     | 0           | 0.862776985 | 0.851 | 0.71  | 0           | 1.198591549  | spermatid      | SRPK2     |
| GOT1      | 0           | 0.862597779 | 0.851 | 0.21  | 0           | 4.052380952  | spermatocyte   | GOT1      |
| RPL34P271 | 2.81E-27    | 0.862338741 | 0.316 | 0.229 | 1.72E-22    | 1.38E+00     | Leydig_cells   | RPL34P27  |
| RPL27A3   | 2.49E-269   | 0.862198748 | 0.891 | 0.782 | 1.53E-264   | 1.14E+00     | PTM_cells      | RPL27A    |
| CD995     | 1.50E-07    | 0.861664006 | 0.5   | 0.197 | 0.009198995 | 2.538071066  | T_cells        | CD99      |
| PCBP2     | 0           | 0.861436554 | 0.793 | 0.537 | 0           | 1.476722533  | spermatogonia  | PCBP2     |
| FILIP1    | 6.32E-88    | 0.861272859 | 0.51  | 0.203 | 3.88E-83    | 2.51E+00     | VSM_cells      | FILIP1    |
| LTBP12    | 2.35E-201   | 0.861198928 | 0.516 | 0.1   | 1.44E-196   | 5.16E+00     | VSM_cells      | LTBP1     |
| CD8B      | 2.34E-149   | 0.86119771  | 0.132 | 0.001 | 1.43E-144   | 1.32E+02     | T_cells        | CD8B      |
| CXorf36   | 0           | 0.861168799 | 0.419 | 0.001 | 0           | 419          | endotheliocyte | CXorf36   |
| MIR193BHG | 0           | 0.861124161 | 0.538 | 0.145 | 0           | 3.710344828  | spermatid      | MIR193BHG |
| FAM43A    | 0           | 0.861085826 | 0.419 | 0.031 | 0           | 13.51612903  | endotheliocyte | FAM43A    |
| TCEAL1    | 0           | 0.861068117 | 0.489 | 0.036 | 0           | 13.583333333 | PTM_cells      | TCEAL1    |
| NCKAP1L1  | 1.83E-33    | 0.860965835 | 0.237 | 0.013 | 1.12E-28    | 1.82E+01     | T_cells        | NCKAP1L   |
| LRRC17    | 0           | 0.860842099 | 0.413 | 0.025 | 0           | 16.52        | Leydig_cells   | LRRC17    |
| FCGBP     | 1.27E-21    | 0.860785558 | 0.175 | 0.054 | 7.82E-17    | 3.24E+00     | macrophages    | FCGBP     |
| RPS19     | 0           | 0.860374129 | 0.859 | 0.732 | 0           | 1.173497268  | spermatogonia  | RPS19     |
| RPL34P18  | 0.004644961 | 0.860250399 | 0.226 | 0.207 | 1           | 1.09178744   | endotheliocyte | RPL34P18  |
| EEF1B2    | 6.68E-89    | 0.860210893 | 0.849 | 0.615 | 4.10E-84    | 1.38E+00     | endotheliocyte | EEF1B2    |
| MX1       | 0           | 0.859968439 | 0.467 | 0.027 | 0           | 17.2962963   | endotheliocyte | MX1       |
| MROH7     | 0           | 0.859865232 | 0.619 | 0.223 | 0           | 2.775784753  | spermatid      | MROH7     |
| HIP1      | 0           | 0.859227789 | 0.575 | 0.173 | 0           | 3.323699422  | spermatid      | HIP1      |
| GNB2L14   | 2.37E-06    | 0.858956524 | 0.684 | 0.471 | 0.145628935 | 1.452229299  | T_cells        | GNB2L1    |
| WDR83OS1  | 6.93E-91    | 0.858829703 | 0.396 | 0.234 | 4.25E-86    | 1.69E+00     | Sertoli_cells  | WDR83OS   |
| TSC22D3   | 7.46E-167   | 0.858796908 | 0.6   | 0.141 | 4.57E-162   | 4.26E+00     | endotheliocyte | TSC22D3   |
| EIF5      | 0           | 0.858674725 | 0.872 | 0.681 | 0           | 1.280469897  | spermatogonia  | EIF5      |
| LSM6      | 0           | 0.858280153 | 0.506 | 0.074 | 0           | 6.837837838  | spermatogonia  | LSM6      |
| RPL185    | 9.10E-241   | 0.858058946 | 0.798 | 0.558 | 5.58E-236   | 1.43E+00     | Sertoli_cells  | RPL18     |
| SP100     | 0           | 0.857877153 | 0.521 | 0.049 | 0           | 10.63265306  | endotheliocyte | SP100     |
| 09-Sep    | 3.50E-219   | 0.857638359 | 0.371 | 0.123 | 2.15E-214   | 3.02E+00     | Sertoli_cells  | 09-Sep    |
| TAGAP     | 5.83E-209   | 0.857533564 | 0.313 | 0.024 | 3.58E-204   | 1.30E+01     | macrophages    | TAGAP     |
| TPT14     | 1.43E-112   | 0.857522508 | 0.934 | 0.858 | 8.76E-108   | 1.09E+00     | VSM_cells      | TPT1      |
| SSX2IP    | 0           | 0.857382967 | 0.813 | 0.613 | 0           | 1.326264274  | spermatid      | SSX2IP    |
| SPA17     | 0           | 0.857377042 | 0.991 | 0.664 | 0           | 1.49246988   | spermatocyte   | SPA17     |
| HENMT1    | 0           | 0.857326343 | 0.642 | 0.23  | 0           | 2.791304348  | spermatogonia  | HENMT1    |
| GIMAP6    | 0           | 0.857165841 | 0.474 | 0.002 | 0           | 237          | endotheliocyte | GIMAP6    |
| RPS194    | 1.83E-264   | 0.857155758 | 0.912 | 0.752 | 1.12E-259   | 1.21E+00     | PTM_cells      | RPS19     |
| MYC3      | 1.55E-196   | 0.857056488 | 0.419 | 0.065 | 9.50E-192   | 6.45E+00     | VSM_cells      | MYC       |
| ARL6IP53  | 0           | 0.857045528 | 0.639 | 0.183 | 0           | 3.491803279  | PTM_cells      | ARL6IP5   |
| INSL31    | 1.59E-82    | 0.856598678 | 0.267 | 0.106 | 9.73E-78    | 2.52E+00     | PTM_cells      | INSL3     |
| G6PD      | 1.80E-307   | 0.856484586 | 0.313 | 0.067 | 1.10E-302   | 4.67E+00     | Sertoli_cells  | G6PD      |
| RPL39L    | 0           | 0.856381578 | 0.974 | 0.534 | 0           | 1.823970037  | spermatocyte   | RPL39L    |
| ZNF711    | 0           | 0.856365746 | 0.321 | 0.054 | 0           | 5.944444444  | Sertoli_cells  | ZNF711    |
| SPARC     | 1.12E-132   | 0.856291034 | 0.742 | 0.241 | 6.87E-128   | 3.08E+00     | endotheliocyte | SPARC     |
| YPEL1     | 0           | 0.85624151  | 0.961 | 0.486 | 0           | 1.977366255  | spermatocyte   | YPEL1     |
| PSAP2     | 9.80E-271   | 0.856146566 | 0.798 | 0.431 | 6.01E-266   | 1.85E+00     | PTM_cells      | PSAP      |
| SLC38A7   | 0           | 0.855870985 | 0.578 | 0.13  | 0           | 4.446153846  | spermatid      | SLC38A7   |
| NR4A14    | 8.16E-31    | 0.855592884 | 0.329 | 0.257 | 5.01E-26    | 1.28E+00     | Sertoli_cells  | NR4A1     |
| FAM129A   | 4.48E-153   | 0.855444645 | 0.283 | 0.026 | 2.75E-148   | 1.09E+01     | macrophages    | FAM129A   |
| TAGLN21   | 4.27E-38    | 0.855097147 | 0.471 | 0.21  | 2.62E-33    | 2.24E+00     | macrophages    | TAGLN2    |
| TDRG1     | 0           | 0.854638109 | 0.387 | 0.142 | 0           | 2.725352113  | spermatogonia  | TDRG1     |
| TMSB102   | 0           | 0.854372794 | 0.886 | 0.377 | 0           | 2.350132626  | Leydig_cells   | TMSB10    |
| NDUFA42   | 2.12E-74    | 0.854185591 | 0.581 | 0.523 | 1.30E-69    | 1.11E+00     | Sertoli_cells  | NDUFA4    |
| FOXP1     | 5.16E-67    | 0.854085348 | 0.675 | 0.395 | 3.17E-62    | 1.71E+00     | endotheliocyte | FOXP1     |
| SRRM2     | 0           | 0.853769354 | 0.792 | 0.491 | 0           | 1.613034623  | spermatogonia  | SRRM2     |
| ATRX      | 8.11E-144   | 0.853631664 | 0.578 | 0.143 | 4.97E-139   | 4.04E+00     | endotheliocyte | ATRX      |
| MMP15     | 0           | 0.853251514 | 0.293 | 0.03  | 0           | 9.766666667  | Sertoli_cells  | MMP15     |
| CHIC2     | 0           | 0.853200322 | 0.69  | 0.349 | 0           | 1.977077364  | spermatogonia  | CHIC2     |
| RND3      | 0           | 0.8531933   | 0.427 | 0.046 | 0           | 9.282608696  | VSM_cells      | RND3      |
| SPACA9    | 0           | 0.853023048 | 0.337 | 0.138 | 0           | 2.442028986  | spermatid      | SPACA9    |
| RPL36A3   | 0           | 0.852937402 | 0.557 | 0.119 | 0           | 4.680672269  | PTM_cells      | RPL36A    |
| PRR30     | 0           | 0.852847766 | 0.69  | 0.367 | 0           | 1.880108992  | spermatid      | PRR30     |
| ARPC1B    | 3.75E-272   | 0.852771023 | 0.536 | 0.071 | 2.30E-267   | 7.55E+00     | endotheliocyte | ARPC1B    |
| GPAA1     | 0           | 0.852721505 | 0.548 | 0.143 | 0           | 3.832167832  | spermatogonia  | GPAA1     |
| CITED22   | 3.34E-10    | 0.852506225 | 0.316 | 0.07  | 2.05E-05    | 4.51E+00     | T_cells        | CITED2    |
| SLC2A32   | 0           | 0.852158416 | 0.432 | 0.076 | 0           | 5.684210526  | PTM_cells      | SLC2A3    |
| SDPR1     | 0.006277763 | 0.851887237 | 0.12  | 0.044 | 1           | 2.727272727  | mastocyte      | SDPR      |
| MCL15     | 0.001857294 | 0.851514493 | 0.579 | 0.53  | 1           | 1.09245283   | T_cells        | MCL1      |

|               |             |             |       |       |             |             |                |               |
|---------------|-------------|-------------|-------|-------|-------------|-------------|----------------|---------------|
| FLNA3         | 4.54E-11    | 0.851096842 | 0.447 | 0.119 | 2.78E-06    | 3.76E+00    | T_cells        | FLNA          |
| PPP1R1C       | 0           | 0.851055015 | 0.865 | 0.247 | 0           | 3.502024291 | spermatocyte   | PPP1R1C       |
| RAE1          | 0           | 0.851019571 | 0.883 | 0.4   | 0           | 2.2075      | spermatocyte   | RAE1          |
| TNFRSF1B1     | 2.08E-76    | 0.850832978 | 0.316 | 0.01  | 1.28E-71    | 3.16E+01    | T_cells        | TNFRSF1B      |
| DCAF4L1       | 0           | 0.850790915 | 0.566 | 0.175 | 0           | 3.234285714 | spermatogonia  | DCAF4L1       |
| HN1           | 0           | 0.850768488 | 0.992 | 0.709 | 0           | 1.399153738 | spermatocyte   | HN1           |
| SLC9B1        | 0           | 0.850608645 | 0.879 | 0.278 | 0           | 3.161870504 | spermatocyte   | SLC9B1        |
| ATP6V1G1      | 0           | 0.850036693 | 0.754 | 0.448 | 0           | 1.683035714 | spermatogonia  | ATP6V1G1      |
| 01-Mar        | 3.18E-244   | 0.84986653  | 0.296 | 0.018 | 1.95E-239   | 1.64E+01    | macrophages    | 01-Mar        |
| EEF1B25       | 7.11E-08    | 0.849736347 | 0.816 | 0.618 | 0.004364205 | 1.32038835  | T_cells        | EEF1B2        |
| FUZ           | 0           | 0.849540059 | 0.766 | 0.53  | 0           | 1.445283019 | spermatid      | FUZ           |
| PID1          | 0           | 0.849471728 | 0.393 | 0.03  | 0           | 13.1        | Leydig_cells   | PID1          |
| TPM32         | 1.17E-78    | 0.849424933 | 0.484 | 0.383 | 7.16E-74    | 1.26E+00    | Sertoli_cells  | TPM3          |
| UTRN          | 1.85E-64    | 0.849148322 | 0.66  | 0.366 | 1.14E-59    | 1.80E+00    | endotheliocyte | UTRN          |
| GLTSCR23      | 2.88E-06    | 0.849073147 | 0.684 | 0.521 | 0.176587217 | 1.312859885 | T_cells        | GLTSCR2       |
| TPD52L3       | 0           | 0.849006945 | 0.983 | 0.498 | 0           | 1.973895582 | spermatocyte   | TPD52L3       |
| ACTR2         | 9.56E-26    | 0.848708912 | 0.512 | 0.339 | 5.86E-21    | 1.51E+00    | macrophages    | ACTR2         |
| GRB2          | 1.94E-42    | 0.848300465 | 0.397 | 0.149 | 1.19E-37    | 2.66E+00    | macrophages    | GRB2          |
| MPEG1         | 0           | 0.848046499 | 0.29  | 0.001 | 0           | 290         | macrophages    | MPEG1         |
| TSPO4         | 0           | 0.847983697 | 0.594 | 0.084 | 0           | 7.071428571 | VSM_cells      | TSPO          |
| PABPC1        | 0           | 0.847979829 | 0.996 | 0.821 | 0           | 1.213154689 | spermatocyte   | PABPC1        |
| LRRC46        | 0           | 0.847979063 | 0.934 | 0.296 | 0           | 3.155405405 | spermatocyte   | LRRC46        |
| GMFG          | 3.17E-79    | 0.847884055 | 0.333 | 0.069 | 1.94E-74    | 4.83E+00    | macrophages    | GMFG          |
| TAGAP1        | 9.62E-20    | 0.847864593 | 0.263 | 0.027 | 5.90E-15    | 9.74E+00    | T_cells        | TAGAP         |
| SMS           | 0           | 0.847813245 | 0.32  | 0.058 | 0           | 5.517241379 | spermatogonia  | SMS           |
| MGAT1         | 7.05E-21    | 0.847550422 | 0.397 | 0.233 | 4.33E-16    | 1.70E+00    | macrophages    | MGAT1         |
| NES           | 0           | 0.84747678  | 0.412 | 0.028 | 0           | 14.71428571 | endotheliocyte | NES           |
| RGMB-AS1      | 0           | 0.847445116 | 0.566 | 0.257 | 0           | 2.20233463  | spermatocyte   | RGMB-AS1      |
| MTX2          | 0           | 0.847380253 | 0.644 | 0.287 | 0           | 2.243902439 | spermatogonia  | MTX2          |
| SLC39A13      | 0           | 0.847340983 | 0.682 | 0.333 | 0           | 2.048048048 | spermatid      | SLC39A13      |
| MAP1B1        | 0           | 0.847121545 | 0.605 | 0.141 | 0           | 4.290780142 | PTM_cells      | MAP1B         |
| TXNIP3        | 0           | 0.847056941 | 0.684 | 0.148 | 0           | 4.621621622 | PTM_cells      | TXNIP         |
| RP11.597D13.8 | 0           | 0.847050195 | 0.351 | 0.129 | 0           | 2.720930233 | spermatid      | RP11.597D13.8 |
| DMRTC2        | 0           | 0.846883145 | 0.485 | 0.094 | 0           | 5.159574468 | spermatogonia  | DMRTC2        |
| HSPA1A4       | 6.38E-79    | 0.846671581 | 0.683 | 0.358 | 3.91E-74    | 1.91E+00    | VSM_cells      | HSPA1A        |
| TCEAL4        | 0           | 0.84664859  | 0.627 | 0.173 | 0           | 3.624277457 | Leydig_cells   | TCEAL4        |
| RAC11         | 6.30E-91    | 0.846323047 | 0.749 | 0.374 | 3.86E-86    | 2.00E+00    | endotheliocyte | RAC1          |
| FAU2          | 2.45E-117   | 0.845948039 | 0.909 | 0.836 | 1.50E-112   | 1.09E+00    | VSM_cells      | FAU           |
| SQLE          | 0           | 0.845912015 | 0.603 | 0.217 | 0           | 2.778801843 | spermatogonia  | SQLE          |
| C3AR1         | 0           | 0.845844562 | 0.279 | 0.008 | 0           | 34.875      | macrophages    | C3AR1         |
| S100A101      | 1.16E-121   | 0.84581771  | 0.672 | 0.43  | 7.10E-117   | 1.56E+00    | Leydig_cells   | S100A10       |
| IL6           | 1.28E-288   | 0.845737896 | 0.261 | 0.015 | 7.84E-284   | 1.74E+01    | endotheliocyte | IL6           |
| LY6E2         | 0           | 0.845294729 | 0.578 | 0.095 | 0           | 6.084210526 | PTM_cells      | LY6E          |
| ANXA53        | 2.33E-288   | 0.844707159 | 0.689 | 0.301 | 1.43E-283   | 2.29E+00    | PTM_cells      | ANXA5         |
| PSAP3         | 1.29E-20    | 0.844542939 | 0.431 | 0.45  | 7.94E-16    | 9.58E-01    | Sertoli_cells  | PSAP          |
| TCTE3         | 0           | 0.844461876 | 0.859 | 0.228 | 0           | 3.76754386  | spermatocyte   | TCTE3         |
| GEM           | 0           | 0.844461316 | 0.406 | 0.042 | 0           | 9.666666667 | VSM_cells      | GEM           |
| SERTAD13      | 1.46E-239   | 0.84429963  | 0.469 | 0.07  | 8.97E-235   | 6.70E+00    | VSM_cells      | SERTAD1       |
| SAE1          | 0           | 0.843781772 | 0.612 | 0.157 | 0           | 3.898089172 | spermatogonia  | SAE1          |
| RPL29         | 1.05E-110   | 0.843460817 | 0.943 | 0.846 | 6.46E-106   | 1.11E+00    | endotheliocyte | RPL29         |
| HRASLS        | 0           | 0.843284207 | 0.951 | 0.428 | 0           | 2.221962617 | spermatocyte   | HRASLS        |
| RPL27         | 2.93E-93    | 0.842439897 | 0.883 | 0.659 | 1.79E-88    | 1.34E+00    | endotheliocyte | RPL27         |
| MDFIC         | 1.27E-23    | 0.842408841 | 0.237 | 0.019 | 7.79E-19    | 1.25E+01    | T_cells        | MDFIC         |
| CARTPT        | 0           | 0.842284682 | 0.765 | 0.117 | 0           | 6.538461538 | spermatocyte   | CARTPT        |
| RNF114        | 0           | 0.841907592 | 0.99  | 0.64  | 0           | 1.546875    | spermatocyte   | RNF114        |
| RPS93         | 1.18E-288   | 0.841712378 | 0.914 | 0.834 | 7.24E-284   | 1.10E+00    | PTM_cells      | RPS9          |
| RPS213        | 4.46E-242   | 0.841710266 | 0.906 | 0.668 | 2.73E-237   | 1.36E+00    | Leydig_cells   | RPS2          |
| RNF141        | 0           | 0.841577086 | 0.727 | 0.541 | 0           | 1.343807763 | spermatid      | RNF141        |
| GALNTL5       | 0           | 0.841468554 | 0.638 | 0.243 | 0           | 2.625514403 | spermatid      | GALNTL5       |
| TXN           | 1.02E-114   | 0.840769721 | 0.685 | 0.258 | 6.26E-110   | 2.66E+00    | endotheliocyte | TXN           |
| RBM46         | 0           | 0.840742688 | 0.592 | 0.203 | 0           | 2.916256158 | spermatogonia  | RBM46         |
| GAMT          | 0           | 0.840654924 | 0.533 | 0.088 | 0           | 6.056818182 | PTM_cells      | GAMT          |
| KIAA1551      | 0.000534581 | 0.840105999 | 0.342 | 0.177 | 1           | 1.93220339  | T_cells        | KIAA1551      |
| TUBA3C        | 0           | 0.839688947 | 0.991 | 0.571 | 0           | 1.735551664 | spermatocyte   | TUBA3C        |
| ZEB22         | 3.39E-255   | 0.839559732 | 0.497 | 0.074 | 2.08E-250   | 6.72E+00    | VSM_cells      | ZEB2          |
| RAB11FIP1     | 5.57E-133   | 0.839543696 | 0.306 | 0.036 | 3.42E-128   | 8.50E+00    | macrophages    | RAB11FIP1     |
| PPA11         | 9.92E-87    | 0.839435338 | 0.44  | 0.291 | 6.09E-82    | 1.51E+00    | Sertoli_cells  | PPA1          |
| PPIG          | 0           | 0.839287153 | 0.667 | 0.267 | 0           | 2.498127341 | spermatogonia  | PPIG          |
| MMP23B        | 0           | 0.838342763 | 0.465 | 0.025 | 0           | 18.6        | PTM_cells      | MMP23B        |
| RPL364        | 2.82E-142   | 0.838097567 | 0.757 | 0.699 | 1.73E-137   | 1.08E+00    | Sertoli_cells  | RPL36         |
| ARL4C         | 8.44E-119   | 0.83801351  | 0.219 | 0.02  | 5.18E-114   | 1.10E+01    | macrophages    | ARL4C         |
| RPL222        | 2.19E-246   | 0.837633962 | 0.85  | 0.638 | 1.34E-241   | 1.33E+00    | PTM_cells      | RPL22         |
| LRRIQ3        | 0           | 0.837287111 | 0.901 | 0.294 | 0           | 3.06462585  | spermatocyte   | LRRIQ3        |
| RIF1          | 0           | 0.837146337 | 0.527 | 0.154 | 0           | 3.422077922 | spermatogonia  | RIF1          |
| CD931         | 2.88E-139   | 0.837098551 | 0.263 | 0.025 | 1.77E-134   | 1.05E+01    | macrophages    | CD93          |

|            |           |             |       |       |             |             |                |           |
|------------|-----------|-------------|-------|-------|-------------|-------------|----------------|-----------|
| KLF104     | 2.01E-79  | 0.837006397 | 0.543 | 0.241 | 1.23E-74    | 2.25E+00    | VSM_cells      | KLF10     |
| VASP       | 3.88E-08  | 0.836971413 | 0.263 | 0.061 | 0.002378949 | 4.31147541  | T_cells        | VASP      |
| GLRX       | 2.47E-205 | 0.836696795 | 0.283 | 0.02  | 1.51E-200   | 1.42E+01    | macrophages    | GLRX      |
| PRPF8      | 0         | 0.836606346 | 0.638 | 0.271 | 0           | 2.354243542 | spermatogonia  | PRPF8     |
| MKRN1      | 0         | 0.836580706 | 0.961 | 0.501 | 0           | 1.918163673 | spermatocyte   | MKRN1     |
| MTATP6P12  | 1.03E-44  | 0.836338559 | 0.374 | 0.23  | 6.31E-40    | 1.63E+00    | Leydig_cells   | MTATP6P1  |
| ASB17      | 0         | 0.835919837 | 0.647 | 0.335 | 0           | 1.931343284 | spermatid      | ASB17     |
| IFT74      | 0         | 0.835915359 | 0.895 | 0.295 | 0           | 3.033898305 | spermatocyte   | IFT74     |
| MTND1P231  | 1.12E-26  | 0.835771298 | 0.576 | 0.372 | 6.89E-22    | 1.55E+00    | macrophages    | MTND1P23  |
| PDCD7      | 0         | 0.835705099 | 0.578 | 0.142 | 0           | 4.070422535 | spermatogonia  | PDCD7     |
| RPL362     | 4.37E-212 | 0.835676781 | 0.842 | 0.695 | 2.68E-207   | 1.21E+00    | PTM_cells      | RPL36     |
| SRRM5      | 0         | 0.835617846 | 0.513 | 0.103 | 0           | 4.980582524 | spermatid      | SRRM5     |
| RPS235     | 7.49E-08  | 0.835574712 | 0.842 | 0.83  | 0.004592166 | 1.014457831 | T_cells        | RPS23     |
| ACP1       | 0         | 0.83542725  | 0.751 | 0.608 | 0           | 1.235197368 | spermatid      | ACP1      |
| MFS2A      | 0         | 0.834747048 | 0.283 | 0.012 | 0           | 23.58333333 | Sertoli_cells  | MFS2A     |
| ATAD1      | 0         | 0.834148541 | 0.76  | 0.522 | 0           | 1.455938697 | spermatid      | ATAD1     |
| WDR78      | 0         | 0.834140178 | 0.9   | 0.234 | 0           | 3.846153846 | spermatocyte   | WDR78     |
| QSOX11     | 8.20E-34  | 0.834073832 | 0.355 | 0.293 | 5.03E-29    | 1.21E+00    | Sertoli_cells  | QSOX1     |
| CD68       | 0         | 0.833913249 | 0.3   | 0.004 | 0           | 75          | macrophages    | CD68      |
| CYR613     | 2.29E-144 | 0.833720625 | 0.298 | 0.105 | 1.41E-139   | 2.84E+00    | Sertoli_cells  | CYR61     |
| PER1       | 2.64E-28  | 0.833649541 | 0.414 | 0.204 | 1.62E-23    | 2.03E+00    | macrophages    | PER1      |
| MT-ND11    | 3.01E-66  | 0.83362633  | 0.734 | 0.406 | 1.85E-61    | 1.81E+00    | endotheliocyte | MT-ND1    |
| ITGA7      | 0         | 0.83358526  | 0.448 | 0.048 | 0           | 9.333333333 | VSM_cells      | ITGA7     |
| AKR1C11    | 0         | 0.833559821 | 0.503 | 0.074 | 0           | 6.797297297 | PTM_cells      | AKR1C1    |
| LAMA2      | 2.75E-254 | 0.833512968 | 0.368 | 0.081 | 1.69E-249   | 4.54E+00    | Leydig_cells   | LAMA2     |
| IGSF6      | 0         | 0.833508642 | 0.29  | 0.002 | 0           | 145         | macrophages    | IGSF6     |
| TTK        | 0         | 0.833426516 | 0.844 | 0.243 | 0           | 3.473251029 | spermatocyte   | TTK       |
| PA2G4      | 0         | 0.83342192  | 0.964 | 0.498 | 0           | 1.935742972 | spermatocyte   | PA2G4     |
| CASP41     | 2.55E-30  | 0.832975158 | 0.263 | 0.018 | 1.57E-25    | 1.46E+01    | T_cells        | CASP4     |
| MKRN2      | 0         | 0.832873315 | 0.672 | 0.475 | 0           | 1.414736842 | spermatid      | MKRN2     |
| SLFN5      | 0         | 0.832693683 | 0.429 | 0.016 | 0           | 26.8125     | endotheliocyte | SLFN5     |
| CCDC146    | 0         | 0.832571912 | 0.932 | 0.281 | 0           | 3.316725979 | spermatocyte   | CCDC146   |
| RBX1       | 0         | 0.832552774 | 0.698 | 0.325 | 0           | 2.147692308 | spermatogonia  | RBX1      |
| RPL7       | 5.79E-70  | 0.832393269 | 0.913 | 0.794 | 3.55E-65    | 1.15E+00    | endotheliocyte | RPL7      |
| NFIC       | 6.26E-188 | 0.832231    | 0.559 | 0.234 | 3.84E-183   | 2.39E+00    | Leydig_cells   | NFIC      |
| NR4A11     | 1.45E-127 | 0.832217569 | 0.522 | 0.25  | 8.91E-123   | 2.09E+00    | Leydig_cells   | NR4A1     |
| HNRNPA1    | 5.69E-79  | 0.832107027 | 0.841 | 0.602 | 3.49E-74    | 1.40E+00    | endotheliocyte | HNRNPA1   |
| CKB1       | 3.21E-151 | 0.831899128 | 0.726 | 0.689 | 1.97E-146   | 1.05E+00    | Sertoli_cells  | CKB       |
| RPSA3      | 2.30E-10  | 0.831661027 | 0.868 | 0.622 | 1.41E-05    | 1.40E+00    | T_cells        | RPSA      |
| CCND2      | 0         | 0.831148242 | 0.463 | 0.039 | 0           | 11.87179487 | PTM_cells      | CCND2     |
| PTMA3      | 1.14E-274 | 0.831114646 | 0.905 | 0.644 | 6.99E-270   | 1.41E+00    | PTM_cells      | PTMA      |
| ROPN1B     | 0         | 0.831055006 | 0.99  | 0.627 | 0           | 1.578947368 | spermatocyte   | ROPN1B    |
| AES        | 0         | 0.831037735 | 0.531 | 0.134 | 0           | 3.962686567 | Leydig_cells   | AES       |
| CRTAP1     | 0         | 0.831019228 | 0.448 | 0.094 | 0           | 4.765957447 | Leydig_cells   | CRTAP     |
| IFI44L1    | 5.23E-124 | 0.830964589 | 0.3   | 0.036 | 3.21E-119   | 8.33E+00    | macrophages    | IFI44L    |
| IPO5       | 0         | 0.830913829 | 0.852 | 0.704 | 0           | 1.210227273 | spermatid      | IPO5      |
| RPL242     | 1.70E-238 | 0.830695311 | 0.875 | 0.736 | 1.04E-233   | 1.19E+00    | PTM_cells      | RPL24     |
| ATP5I      | 1.43E-33  | 0.83008821  | 0.361 | 0.293 | 8.78E-29    | 1.23E+00    | Sertoli_cells  | ATP5I     |
| RPS252     | 1.19E-07  | 0.830040894 | 0.921 | 0.833 | 0.007320355 | 1.105642257 | T_cells        | RPS25     |
| RPS114     | 1.40E-113 | 0.830012141 | 0.92  | 0.821 | 8.56E-109   | 1.12E+00    | VSM_cells      | RPS11     |
| SERTAD1    | 1.39E-285 | 0.829971245 | 0.546 | 0.07  | 8.50E-281   | 7.80E+00    | endotheliocyte | SERTAD1   |
| COX7A12    | 7.00E-246 | 0.82977115  | 0.495 | 0.077 | 4.30E-241   | 6.43E+00    | VSM_cells      | COX7A1    |
| RACK1      | 8.17E-16  | 0.829612863 | 0.374 | 0.232 | 5.01E-11    | 1.61E+00    | macrophages    | RACK1     |
| SLC6A8     | 0         | 0.828937328 | 0.305 | 0.032 | 0           | 9.53125     | Sertoli_cells  | SLC6A8    |
| CLEC2B1    | 2.23E-42  | 0.828542015 | 0.316 | 0.018 | 1.37E-37    | 1.76E+01    | T_cells        | CLEC2B    |
| SLCO2B1    | 2.62E-226 | 0.828256604 | 0.263 | 0.015 | 1.61E-221   | 1.75E+01    | macrophages    | SLCO2B1   |
| FRMD4B1    | 1.29E-81  | 0.82824299  | 0.337 | 0.067 | 7.91E-77    | 5.03E+00    | macrophages    | FRMD4B    |
| SERPINH1   | 0         | 0.828170262 | 0.468 | 0.089 | 0           | 5.258426966 | Leydig_cells   | SERPINH1  |
| TNFAIP8    | 9.59E-100 | 0.828033388 | 0.266 | 0.036 | 5.88E-95    | 7.39E+00    | macrophages    | TNFAIP8   |
| C8orf41    | 0         | 0.827385595 | 0.34  | 0.017 | 0           | 20          | Leydig_cells   | C8orf4    |
| RACK11     | 1.83E-25  | 0.827271858 | 0.312 | 0.23  | 1.12E-20    | 1.36E+00    | Leydig_cells   | RACK1     |
| NUDC       | 0         | 0.826806382 | 0.704 | 0.415 | 0           | 1.696385542 | spermatogonia  | NUDC      |
| LAMP2      | 0         | 0.826669552 | 0.444 | 0.085 | 0           | 5.223529412 | Leydig_cells   | LAMP2     |
| IFI27L1    | 2.76E-82  | 0.826018947 | 0.582 | 0.534 | 1.69E-77    | 1.09E+00    | Sertoli_cells  | IFI27L1   |
| RPL13AP251 | 7.09E-29  | 0.825720156 | 0.316 | 0.125 | 4.35E-24    | 2.53E+00    | macrophages    | RPL13AP25 |
| SLCO6A1    | 0         | 0.825650737 | 0.904 | 0.255 | 0           | 3.545098039 | spermatocyte   | SLCO6A1   |
| PROK11     | 0         | 0.825605762 | 0.401 | 0.058 | 0           | 6.913793103 | PTM_cells      | PROK1     |
| LYVE1      | 0         | 0.825559774 | 0.205 | 0.005 | 0           | 41          | macrophages    | LYVE1     |
| CD7        | 4.79E-53  | 0.825433589 | 0.158 | 0.004 | 2.94E-48    | 3.95E+01    | T_cells        | CD7       |
| DSE        | 9.23E-39  | 0.825408841 | 0.33  | 0.115 | 5.66E-34    | 2.87E+00    | macrophages    | DSE       |
| MIS18A     | 0         | 0.825050953 | 0.612 | 0.144 | 0           | 4.25        | spermatogonia  | MIS18A    |
| DDX51      | 2.20E-49  | 0.825018633 | 0.855 | 0.764 | 1.35E-44    | 1.12E+00    | macrophages    | DDX5      |
| TEX30      | 0         | 0.825001821 | 0.762 | 0.54  | 0           | 1.411111111 | spermatogonia  | TEX30     |
| RPL94      | 2.42E-13  | 0.824849288 | 0.974 | 0.875 | 1.49E-08    | 1.11E+00    | T_cells        | RPL9      |
| SNHG51     | 6.87E-38  | 0.824803003 | 0.273 | 0.081 | 4.22E-33    | 3.37E+00    | macrophages    | SNHG5     |

|                |           |             |       |       |             |             |                |                |
|----------------|-----------|-------------|-------|-------|-------------|-------------|----------------|----------------|
| PRDX1          | 0         | 0.82450456  | 0.635 | 0.234 | 0           | 2.713675214 | spermatogonia  | PRDX1          |
| RPL35A         | 3.48E-103 | 0.824293636 | 0.963 | 0.87  | 2.14E-98    | 1.11E+00    | endotheliocyte | RPL35A         |
| UBE2N          | 0         | 0.824160167 | 0.907 | 0.817 | 0           | 1.110159119 | spermatid      | UBE2N          |
| RP11.104H15.12 | 0         | 0.823994237 | 0.309 | 0.085 | 0           | 3.635294118 | spermatid      | RP11.104H15.12 |
| PNISR          | 0         | 0.823770404 | 0.703 | 0.359 | 0           | 1.95821727  | spermatogonia  | PNISR          |
| LSP1           | 5.54E-129 | 0.823736384 | 0.273 | 0.029 | 3.40E-124   | 9.41E+00    | macrophages    | LSP1           |
| PLOD1          | 0         | 0.823695688 | 0.336 | 0.03  | 0           | 11.2        | Leydig_cells   | PLOD1          |
| RPS92          | 4.54E-256 | 0.823488733 | 0.936 | 0.834 | 2.78E-251   | 1.12E+00    | Leydig_cells   | RPS9           |
| EMP22          | 0         | 0.823205989 | 0.577 | 0.17  | 0           | 3.394117647 | PTM_cells      | EMP2           |
| GJA4           | 4.00E-286 | 0.823197993 | 0.251 | 0.014 | 2.45E-281   | 1.79E+01    | endotheliocyte | GJA4           |
| RAB11A         | 0         | 0.823119234 | 0.957 | 0.474 | 0           | 2.018987342 | spermatocyte   | RAB11A         |
| MYCT1          | 6.21E-303 | 0.822837923 | 0.434 | 0.044 | 3.81E-298   | 9.86E+00    | endotheliocyte | MYCT1          |
| PYCARD         | 5.96E-299 | 0.822719859 | 0.313 | 0.016 | 3.65E-294   | 1.96E+01    | macrophages    | PYCARD         |
| PPIF1          | 1.28E-176 | 0.82239201  | 0.323 | 0.112 | 7.85E-172   | 2.88E+00    | Sertoli_cells  | PPIF           |
| ANAPC15        | 0         | 0.822322804 | 0.558 | 0.157 | 0           | 3.554140127 | spermatogonia  | ANAPC15        |
| ADAM29         | 0         | 0.821841988 | 0.684 | 0.303 | 0           | 2.257425743 | spermatid      | ADAM29         |
| PCDH17         | 0         | 0.821790787 | 0.747 | 0.168 | 0           | 4.446428571 | spermatocyte   | PCDH17         |
| CTNNAL1        | 1.94E-65  | 0.8217033   | 0.618 | 0.337 | 1.19E-60    | 1.83E+00    | endotheliocyte | CTNNAL1        |
| RPS282         | 2.34E-219 | 0.821648889 | 0.83  | 0.599 | 1.44E-214   | 1.39E+00    | PTM_cells      | RPS28          |
| ADD3           | 1.40E-126 | 0.821490598 | 0.63  | 0.406 | 8.62E-122   | 1.55E+00    | Leydig_cells   | ADD3           |
| GGNBP2         | 0         | 0.821400805 | 0.985 | 0.577 | 0           | 1.707105719 | spermatocyte   | GGNBP2         |
| MT-ND2         | 1.49E-137 | 0.821216193 | 0.487 | 0.393 | 9.16E-133   | 1.24E+00    | spermatogonia  | MT-ND2         |
| REEP6          | 0         | 0.821079666 | 0.699 | 0.406 | 0           | 1.721674877 | spermatid      | REEP6          |
| RNF113B        | 0         | 0.820990015 | 0.757 | 0.167 | 0           | 4.532934132 | spermatocyte   | RNF113B        |
| VCAM1          | 0         | 0.820902566 | 0.323 | 0.019 | 0           | 17          | endotheliocyte | VCAM1          |
| SUPT20H        | 0         | 0.820897663 | 0.898 | 0.319 | 0           | 2.815047022 | spermatocyte   | SUPT20H        |
| CCNL1          | 6.65E-26  | 0.820772635 | 0.535 | 0.345 | 4.08E-21    | 1.55E+00    | macrophages    | CCNL1          |
| TBL2           | 0         | 0.820242889 | 0.987 | 0.537 | 0           | 1.837988827 | spermatocyte   | TBL2           |
| LACTB2         | 0         | 0.820075574 | 0.879 | 0.307 | 0           | 2.863192182 | spermatocyte   | LACTB2         |
| ADAM30         | 0         | 0.819843783 | 0.878 | 0.181 | 0           | 4.850828729 | spermatocyte   | ADAM30         |
| TAF7L          | 2.51E-170 | 0.819826571 | 0.331 | 0.12  | 1.54E-165   | 2.76E+00    | Sertoli_cells  | TAF7L          |
| LSAMP          | 0         | 0.819826517 | 0.4   | 0.081 | 0           | 4.938271605 | Leydig_cells   | LSAMP          |
| UQCR10         | 0         | 0.819745884 | 0.913 | 0.513 | 0           | 1.779727096 | spermatocyte   | UQCR10         |
| RPL36A2        | 9.98E-254 | 0.819498594 | 0.476 | 0.126 | 6.12E-249   | 3.78E+00    | Leydig_cells   | RPL36A         |
| PIK3R1         | 1.79E-48  | 0.819346009 | 0.33  | 0.095 | 1.10E-43    | 3.47E+00    | macrophages    | PIK3R1         |
| MT-ATP8        | 1.57E-194 | 0.819268866 | 0.529 | 0.106 | 9.66E-190   | 4.99E+00    | VSM_cells      | MT-ATP8        |
| GS1.259H13.2   | 0         | 0.819074215 | 0.404 | 0.157 | 0           | 2.573248408 | spermatocyte   | GS1.259H13.2   |
| DNAL1          | 0         | 0.819049676 | 0.913 | 0.346 | 0           | 2.638728324 | spermatocyte   | DNAL1          |
| C1QTNF1        | 0         | 0.818999496 | 0.412 | 0.011 | 0           | 37.45454545 | VSM_cells      | C1QTNF1        |
| DDX25          | 0         | 0.818837312 | 0.958 | 0.402 | 0           | 2.383084577 | spermatocyte   | DDX25          |
| TSPO1          | 1.38E-58  | 0.818757466 | 0.35  | 0.09  | 8.46E-54    | 3.89E+00    | macrophages    | TSPO           |
| TAX1BP31       | 0         | 0.818553802 | 0.493 | 0.098 | 0           | 5.030612245 | PTM_cells      | TAX1BP3        |
| UBE2J2         | 0         | 0.818249471 | 0.96  | 0.498 | 0           | 1.927710843 | spermatocyte   | UBE2J2         |
| EPAS1          | 4.71E-241 | 0.818123057 | 0.493 | 0.077 | 2.89E-236   | 6.40E+00    | VSM_cells      | EPAS1          |
| SAXO1          | 0         | 0.818053884 | 0.553 | 0.286 | 0           | 1.933566434 | spermatid      | SAXO1          |
| RPL263         | 1.64E-223 | 0.817931523 | 0.888 | 0.749 | 1.01E-218   | 1.19E+00    | PTM_cells      | RPL26          |
| MGST21         | 0         | 0.817797325 | 0.29  | 0.056 | 0           | 5.178571429 | Sertoli_cells  | MGST2          |
| PTN2           | 1.32E-156 | 0.817576175 | 0.373 | 0.156 | 8.08E-152   | 2.39E+00    | Sertoli_cells  | PTN            |
| COL4A2         | 0         | 0.817529826 | 0.474 | 0.054 | 0           | 8.777777778 | PTM_cells      | COL4A2         |
| CTD-2568A17.1  | 1.52E-157 | 0.81719053  | 0.439 | 0.368 | 9.33E-153   | 1.19E+00    | spermatid      | CTD-2568A17.1  |
| CRIP2          | 4.35E-67  | 0.816971308 | 0.655 | 0.328 | 2.67E-62    | 2.00E+00    | endotheliocyte | CRIP2          |
| CYB5R33        | 2.13E-123 | 0.81689207  | 0.413 | 0.218 | 1.31E-118   | 1.89E+00    | Sertoli_cells  | CYB5R3         |
| LINC009361     | 1.20E-07  | 0.816803072 | 0.211 | 0.043 | 0.007378944 | 4.906976744 | T_cells        | LINC00936      |
| RPS281         | 5.20E-178 | 0.816779467 | 0.814 | 0.601 | 3.19E-173   | 1.35E+00    | Leydig_cells   | RPS28          |
| IFT172         | 0         | 0.816770475 | 0.61  | 0.285 | 0           | 2.140350877 | spermatid      | IFT172         |
| MRPL43         | 0         | 0.816746468 | 0.911 | 0.38  | 0           | 2.397368421 | spermatocyte   | MRPL43         |
| EFCAB1         | 0         | 0.816389637 | 0.643 | 0.344 | 0           | 1.869186047 | spermatid      | EFCAB1         |
| BBIP1          | 0         | 0.81633721  | 0.946 | 0.47  | 0           | 2.012765957 | spermatocyte   | BBIP1          |
| BTG14          | 1.15E-74  | 0.816313865 | 0.797 | 0.607 | 7.05E-70    | 1.31E+00    | VSM_cells      | BTG1           |
| C3orf22        | 0         | 0.816201826 | 0.569 | 0.207 | 0           | 2.748792271 | spermatid      | C3orf22        |
| PIH1D2         | 0         | 0.816148812 | 0.951 | 0.38  | 0           | 2.502631579 | spermatocyte   | PIH1D2         |
| RASSF4         | 9.95E-273 | 0.815881341 | 0.306 | 0.017 | 6.11E-268   | 1.80E+01    | macrophages    | RASSF4         |
| YBX1           | 0         | 0.81571757  | 0.998 | 0.908 | 0           | 1.099118943 | spermatocyte   | YBX1           |
| FOSB5          | 1.05E-26  | 0.814765558 | 0.389 | 0.341 | 6.43E-22    | 1.14E+00    | Sertoli_cells  | FOSB           |
| TYSND1         | 0         | 0.814693556 | 0.848 | 0.255 | 0           | 3.325490196 | spermatocyte   | TYSND1         |
| IFI272         | 0         | 0.814670874 | 0.553 | 0.113 | 0           | 4.89380531  | PTM_cells      | IFI27          |
| RPL114         | 3.01E-107 | 0.814274143 | 0.922 | 0.824 | 1.85E-102   | 1.12E+00    | VSM_cells      | RPL11          |
| RPL13A5        | 2.26E-280 | 0.813991482 | 0.858 | 0.729 | 1.38E-275   | 1.18E+00    | Sertoli_cells  | RPL13A         |
| TMEM205        | 0         | 0.813876941 | 0.644 | 0.408 | 0           | 1.578431373 | spermatid      | TMEM205        |
| NUCKS13        | 7.14E-94  | 0.813664984 | 0.729 | 0.396 | 4.38E-89    | 1.84E+00    | VSM_cells      | NUCKS1         |
| FBN11          | 0         | 0.813616975 | 0.531 | 0.106 | 0           | 5.009433962 | PTM_cells      | FBN1           |
| LGALS32        | 0         | 0.813461313 | 0.602 | 0.189 | 0           | 3.185185185 | PTM_cells      | LGALS3         |
| HSBP1          | 0         | 0.813211672 | 0.943 | 0.528 | 0           | 1.785984848 | spermatocyte   | HSBP1          |
| GSTP1          | 1.55E-171 | 0.813177341 | 0.702 | 0.166 | 9.50E-167   | 4.23E+00    | endotheliocyte | GSTP1          |
| CCDC65         | 0         | 0.813069333 | 0.932 | 0.258 | 0           | 3.612403101 | spermatocyte   | CCDC65         |

|          |             |             |       |       |           |             |                |          |
|----------|-------------|-------------|-------|-------|-----------|-------------|----------------|----------|
| FTH1P102 | 9.64E-05    | 0.813007883 | 0.36  | 0.162 | 1         | 2.222222222 | mastocyte      | FTH1P10  |
| MTHFD2   | 2.09E-119   | 0.812884549 | 0.503 | 0.155 | 1.28E-114 | 3.25E+00    | VSM_cells      | MTHFD2   |
| HSF5     | 0           | 0.812835867 | 0.859 | 0.197 | 0         | 4.360406091 | spermatocyte   | HSF5     |
| EZR      | 2.29E-20    | 0.81264635  | 0.424 | 0.247 | 1.41E-15  | 1.72E+00    | macrophages    | EZR      |
| PLSCR4   | 0           | 0.812431228 | 0.484 | 0.033 | 0         | 14.66666667 | endotheliocyte | PLSCR4   |
| PIGP     | 0           | 0.812333407 | 0.561 | 0.319 | 0         | 1.75862069  | spermatogonia  | PIGP     |
| TPM4     | 7.71E-115   | 0.812275316 | 0.655 | 0.231 | 4.73E-110 | 2.84E+00    | endotheliocyte | TPM4     |
| HLA-DPB1 | 0           | 0.812202128 | 0.491 | 0.028 | 0         | 17.53571429 | endotheliocyte | HLA-DPB1 |
| EID14    | 1.48E-126   | 0.811870109 | 0.548 | 0.354 | 9.10E-122 | 1.55E+00    | Sertoli_cells  | EID1     |
| SLC26A8  | 0           | 0.811845795 | 0.891 | 0.25  | 0         | 3.564       | spermatocyte   | SLC26A8  |
| CRIP21   | 3.49E-92    | 0.811550409 | 0.677 | 0.327 | 2.14E-87  | 2.07E+00    | VSM_cells      | CRIP2    |
| DDX46    | 0           | 0.811458069 | 0.639 | 0.339 | 0         | 1.884955752 | spermatogonia  | DDX46    |
| GUK12    | 6.01E-49    | 0.811248211 | 0.526 | 0.507 | 3.69E-44  | 1.04E+00    | Sertoli_cells  | GUK1     |
| MAF3     | 6.35E-05    | 0.8111453   | 0.237 | 0.076 | 1         | 3.118421053 | T_cells        | MAF      |
| GNAI2    | 7.57E-74    | 0.810998246 | 0.715 | 0.422 | 4.65E-69  | 1.69E+00    | endotheliocyte | GNAI2    |
| HSPA1A2  | 1.45E-149   | 0.810810801 | 0.634 | 0.352 | 8.89E-145 | 1.80E+00    | Leydig_cells   | HSPA1A   |
| GRID2    | 0           | 0.810732921 | 0.578 | 0.156 | 0         | 3.705128205 | spermatid      | GRID2    |
| PAGE2    | 0           | 0.810729287 | 0.354 | 0.036 | 0         | 9.833333333 | spermatogonia  | PAGE2    |
| RPS25    | 4.76E-96    | 0.810650596 | 0.933 | 0.832 | 2.92E-91  | 1.12E+00    | endotheliocyte | RPS25    |
| MAGEA4   | 0           | 0.810446782 | 0.334 | 0.026 | 0         | 12.84615385 | spermatogonia  | MAGEA4   |
| ZC3H13   | 0           | 0.810432345 | 0.546 | 0.123 | 0         | 4.43902439  | spermatogonia  | ZC3H13   |
| LPP      | 0           | 0.810345451 | 0.724 | 0.37  | 0         | 1.956756757 | spermatid      | LPP      |
| ANXA54   | 8.31E-88    | 0.81020082  | 0.462 | 0.311 | 5.10E-83  | 1.49E+00    | Sertoli_cells  | ANXA5    |
| FXVD1    | 0           | 0.810072953 | 0.386 | 0.04  | 0         | 9.65        | Leydig_cells   | FXVD1    |
| IFNGR11  | 2.58E-37    | 0.809886134 | 0.333 | 0.12  | 1.58E-32  | 2.78E+00    | macrophages    | IFNGR1   |
| ANKRD53  | 0           | 0.809710042 | 0.568 | 0.17  | 0         | 3.341176471 | spermatid      | ANKRD53  |
| ACAP11   | 1.55E-05    | 0.809701796 | 0.579 | 0.369 | 0.9496676 | 1.569105691 | T_cells        | ACAP1    |
| RPL113   | 2.24E-262   | 0.809112711 | 0.924 | 0.821 | 1.38E-257 | 1.13E+00    | PTM_cells      | RPL11    |
| CTSV     | 3.22E-285   | 0.809093219 | 0.285 | 0.059 | 1.98E-280 | 4.83E+00    | Sertoli_cells  | CTSV     |
| RPS3A2   | 0           | 0.808840261 | 0.947 | 0.896 | 0         | 1.056919643 | PTM_cells      | RPS3A    |
| ACAP1    | 0           | 0.808805228 | 0.601 | 0.262 | 0         | 2.29389313  | spermatid      | ACAP1    |
| NDUFS52  | 3.46E-43    | 0.808760374 | 0.47  | 0.449 | 2.12E-38  | 1.05E+00    | Sertoli_cells  | NDUFS5   |
| RB1      | 1.47E-28    | 0.80871611  | 0.357 | 0.164 | 9.02E-24  | 2.18E+00    | macrophages    | RB1      |
| ASS1     | 0           | 0.808648878 | 0.484 | 0.034 | 0         | 14.23529412 | endotheliocyte | ASS1     |
| PPP2R3C  | 0           | 0.808626577 | 0.958 | 0.461 | 0         | 2.078091106 | spermatocyte   | PPP2R3C  |
| AKAP13   | 1.07E-19    | 0.808578983 | 0.539 | 0.409 | 6.58E-15  | 1.32E+00    | macrophages    | AKAP13   |
| ZFH3     | 5.98E-53    | 0.808387712 | 0.327 | 0.088 | 3.67E-48  | 3.72E+00    | macrophages    | ZFH3     |
| ZFP36L14 | 4.45E-81    | 0.808318042 | 0.712 | 0.393 | 2.73E-76  | 1.81E+00    | VSM_cells      | ZFP36L1  |
| UBE2S    | 0           | 0.808301755 | 0.973 | 0.566 | 0         | 1.719081272 | spermatocyte   | UBE2S    |
| SPATA17  | 0           | 0.80809216  | 0.977 | 0.462 | 0         | 2.114718615 | spermatocyte   | SPATA17  |
| SSB      | 0           | 0.807949831 | 0.57  | 0.158 | 0         | 3.607594937 | spermatogonia  | SSB      |
| YWHAH    | 6.68E-47    | 0.807856282 | 0.33  | 0.098 | 4.10E-42  | 3.37E+00    | macrophages    | YWHAH    |
| CYB5A1   | 3.43E-129   | 0.807768149 | 0.326 | 0.135 | 2.10E-124 | 2.41E+00    | Sertoli_cells  | CYB5A    |
| RBM31    | 8.18E-131   | 0.807731483 | 0.71  | 0.221 | 5.02E-126 | 3.21E+00    | endotheliocyte | RBM3     |
| IGF11    | 0           | 0.807589393 | 0.473 | 0.067 | 0         | 7.059701493 | PTM_cells      | IGF1     |
| SPARC1   | 0           | 0.807569409 | 0.706 | 0.229 | 0         | 3.082969432 | Leydig_cells   | SPARC    |
| PFN1     | 0           | 0.807418931 | 0.635 | 0.347 | 0         | 1.829971182 | spermatogonia  | PFN1     |
| STK17A   | 0.002082773 | 0.8073444   | 0.421 | 0.292 | 1         | 1.441780822 | T_cells        | STK17A   |
| ANXA23   | 0           | 0.807324174 | 0.707 | 0.276 | 0         | 2.561594203 | PTM_cells      | ANXA2    |
| NAMPT    | 1.92E-119   | 0.807291245 | 0.541 | 0.148 | 1.17E-114 | 3.66E+00    | endotheliocyte | NAMPT    |
| TSPO5    | 4.19E-10    | 0.807062662 | 0.368 | 0.092 | 2.57E-05  | 4.00E+00    | T_cells        | TSPO     |
| EGR1     | 1.11E-109   | 0.806809739 | 0.715 | 0.257 | 6.83E-105 | 2.78E+00    | endotheliocyte | EGR1     |
| CYGB     | 0           | 0.806804953 | 0.321 | 0.019 | 0         | 16.89473684 | Leydig_cells   | CYGB     |
| GGTA1P   | 0           | 0.806799178 | 0.185 | 0.002 | 0         | 92.5        | macrophages    | GGTA1P   |
| ARFGAP3  | 0           | 0.806756947 | 0.618 | 0.281 | 0         | 2.199288256 | spermatogonia  | ARFGAP3  |
| RPS21    | 0           | 0.80663011  | 0.746 | 0.464 | 0         | 1.607758621 | spermatogonia  | RPS21    |
| 08-Mar   | 0           | 0.806543638 | 0.622 | 0.395 | 0         | 1.574683544 | spermatid      | 08-Mar   |
| LDLR1    | 0           | 0.806325981 | 0.369 | 0.059 | 0         | 6.254237288 | Leydig_cells   | LDLR     |
| JMJD1C1  | 1.13E-57    | 0.806281844 | 0.64  | 0.366 | 6.95E-53  | 1.75E+00    | endotheliocyte | JMJD1C   |
| STX11    | 0           | 0.806217479 | 0.286 | 0.01  | 0         | 28.6        | macrophages    | STX11    |
| NKTR     | 0           | 0.806215984 | 0.68  | 0.332 | 0         | 2.048192771 | spermatogonia  | NKTR     |
| EFHD2    | 1.62E-97    | 0.806172576 | 0.523 | 0.382 | 9.96E-93  | 1.37E+00    | Sertoli_cells  | EFHD2    |
| MT.RNR21 | 7.46E-27    | 0.806138014 | 0.576 | 0.372 | 4.57E-22  | 1.55E+00    | macrophages    | MT.RNR2  |
| GPR34    | 0           | 0.806135367 | 0.239 | 0.003 | 0         | 79.66666667 | macrophages    | GPR34    |
| LMOD1    | 0           | 0.805990087 | 0.492 | 0.035 | 0         | 14.05714286 | PTM_cells      | LMOD1    |
| ETS1     | 0           | 0.805408389 | 0.434 | 0.033 | 0         | 13.15151515 | endotheliocyte | ETS1     |
| RPS172   | 2.23E-39    | 0.805393637 | 0.741 | 0.471 | 1.37E-34  | 1.57E+00    | macrophages    | RPS17    |
| CALM11   | 6.36E-224   | 0.805170539 | 0.846 | 0.685 | 3.90E-219 | 1.24E+00    | PTM_cells      | CALM1    |
| KCNH2    | 0           | 0.805127139 | 0.299 | 0.035 | 0         | 8.542857143 | Sertoli_cells  | KCNH2    |
| RPS163   | 2.22E-262   | 0.80502041  | 0.906 | 0.75  | 1.36E-257 | 1.21E+00    | PTM_cells      | RPS16    |
| IL1R2    | 4.45E-186   | 0.804955926 | 0.182 | 0.009 | 2.73E-181 | 2.02E+01    | macrophages    | IL1R2    |
| CD55     | 0           | 0.804180261 | 0.487 | 0.187 | 0         | 2.604278075 | spermatid      | CD55     |
| CAV22    | 0           | 0.804033686 | 0.536 | 0.103 | 0         | 5.203883495 | PTM_cells      | CAV2     |
| CNBP     | 0           | 0.804027593 | 0.727 | 0.407 | 0         | 1.786240786 | spermatogonia  | CNBP     |
| IL62     | 4.13E-181   | 0.803858601 | 0.195 | 0.015 | 2.53E-176 | 1.30E+01    | VSM_cells      | IL6      |

|             |             |             |       |       |             |             |                |             |
|-------------|-------------|-------------|-------|-------|-------------|-------------|----------------|-------------|
| SPRY1       | 0           | 0.8038326   | 0.373 | 0.064 | 0           | 5.828125    | Leydig_cells   | SPRY1       |
| RPL112      | 1.06E-206   | 0.803831545 | 0.923 | 0.822 | 6.47E-202   | 1.12E+00    | Leydig_cells   | RPL11       |
| MXRA7       | 2.38E-260   | 0.803766357 | 0.451 | 0.115 | 1.46E-255   | 3.92E+00    | Leydig_cells   | MXRA7       |
| DDX3X       | 0           | 0.803533666 | 0.681 | 0.429 | 0           | 1.587412587 | spermatid      | DDX3X       |
| MAPRE3      | 0           | 0.802746766 | 0.609 | 0.358 | 0           | 1.701117318 | spermatid      | MAPRE3      |
| RPL372      | 1.05E-237   | 0.802629163 | 0.917 | 0.801 | 6.43E-233   | 1.14E+00    | Leydig_cells   | RPL37       |
| PAFAH1B3    | 0           | 0.802619879 | 0.296 | 0.067 | 0           | 4.417910448 | spermatogonia  | PAFAH1B3    |
| RPS103      | 4.81E-07    | 0.80220044  | 0.763 | 0.541 | 0.029508898 | 1.410351201 | T_cells        | RPS10       |
| RUVBL1      | 0           | 0.802159104 | 0.62  | 0.191 | 0           | 3.246073298 | spermatogonia  | RUVBL1      |
| CCDC159     | 0           | 0.802037768 | 0.573 | 0.199 | 0           | 2.879396985 | spermatid      | CCDC159     |
| ZYX1        | 2.92E-282   | 0.801894555 | 0.321 | 0.074 | 1.79E-277   | 4.34E+00    | Sertoli_cells  | ZYX         |
| PPP3CC      | 0           | 0.801808644 | 0.896 | 0.261 | 0           | 3.432950192 | spermatocyte   | PPP3CC      |
| CNN1        | 0           | 0.801803058 | 0.621 | 0.226 | 0           | 2.747787611 | spermatid      | CNN1        |
| DDAH2       | 6.05E-236   | 0.80179349  | 0.5   | 0.162 | 3.71E-231   | 3.09E+00    | Leydig_cells   | DDAH2       |
| RPL216      | 4.64E-273   | 0.801768578 | 0.81  | 0.455 | 2.85E-268   | 1.78E+00    | Sertoli_cells  | RPL21       |
| DDIT42      | 0           | 0.801744011 | 0.488 | 0.067 | 0           | 7.28358209  | PTM_cells      | DDIT4       |
| SMARCA1     | 2.48E-303   | 0.801720053 | 0.504 | 0.122 | 1.52E-298   | 4.13E+00    | Leydig_cells   | SMARCA1     |
| ZDHHC19     | 0           | 0.801374884 | 0.645 | 0.28  | 0           | 2.303571429 | spermatid      | ZDHHC19     |
| ISG15       | 5.27E-240   | 0.801226903 | 0.404 | 0.045 | 3.23E-235   | 8.98E+00    | endotheliocyte | ISG15       |
| PPP1CC      | 0           | 0.800907586 | 0.98  | 0.576 | 0           | 1.701388889 | spermatocyte   | PPP1CC      |
| SLC3A21     | 1.62E-114   | 0.800650431 | 0.337 | 0.158 | 9.94E-110   | 2.13E+00    | Sertoli_cells  | SLC3A2      |
| LGALS9      | 3.81E-179   | 0.800612672 | 0.256 | 0.019 | 2.33E-174   | 1.35E+01    | macrophages    | LGALS9      |
| MAP3K14-AS1 | 0           | 0.800342312 | 0.396 | 0.174 | 0           | 2.275862069 | spermatid      | MAP3K14-AS1 |
| TPR         | 0           | 0.800299616 | 0.789 | 0.595 | 0           | 1.32605042  | spermatogonia  | TPR         |
| RPS95       | 9.83E-09    | 0.799733867 | 0.895 | 0.838 | 0.000602967 | 1.068019093 | T_cells        | RPS9        |
| DUSP5       | 2.51E-145   | 0.799414552 | 0.454 | 0.088 | 1.54E-140   | 5.16E+00    | endotheliocyte | DUSP5       |
| CD151       | 3.34E-208   | 0.798925133 | 0.566 | 0.097 | 2.05E-203   | 5.84E+00    | endotheliocyte | CD151       |
| WSB11       | 5.41E-20    | 0.798922598 | 0.549 | 0.425 | 3.32E-15    | 1.29E+00    | macrophages    | WSB1        |
| COL4A21     | 3.60E-222   | 0.798859672 | 0.446 | 0.068 | 2.21E-217   | 6.56E+00    | VSM_cells      | COL4A2      |
| TMEM99      | 2.92E-258   | 0.798852103 | 0.564 | 0.421 | 1.79E-253   | 1.34E+00    | spermatogonia  | TMEM99      |
| GSTK1       | 0           | 0.798791576 | 0.682 | 0.333 | 0           | 2.048048048 | spermatid      | GSTK1       |
| KLF102      | 2.97E-147   | 0.798681517 | 0.507 | 0.235 | 1.82E-142   | 2.16E+00    | Leydig_cells   | KLF10       |
| LYPD4       | 0           | 0.798670801 | 0.972 | 0.462 | 0           | 2.103896104 | spermatocyte   | LYPD4       |
| MTF2        | 0           | 0.798633276 | 0.575 | 0.13  | 0           | 4.423076923 | spermatogonia  | MTF2        |
| KIF20B      | 0           | 0.798553925 | 0.595 | 0.219 | 0           | 2.716894977 | spermatogonia  | KIF20B      |
| PIWIL2      | 0           | 0.798501804 | 0.53  | 0.127 | 0           | 4.173228346 | spermatogonia  | PIWIL2      |
| HCFC1R1     | 0           | 0.798234593 | 0.502 | 0.14  | 0           | 3.585714286 | PTM_cells      | HCFC1R1     |
| SUN3        | 0           | 0.797889895 | 0.606 | 0.322 | 0           | 1.881987578 | spermatid      | SUN3        |
| MTCH11      | 8.33E-120   | 0.797697885 | 0.39  | 0.198 | 5.11E-115   | 1.97E+00    | Sertoli_cells  | MTCH1       |
| IER32       | 3.52E-143   | 0.797630964 | 0.336 | 0.1   | 2.16E-138   | 3.36E+00    | Leydig_cells   | IER3        |
| WT1         | 0           | 0.797439723 | 0.286 | 0.016 | 0           | 17.875      | Sertoli_cells  | WT1         |
| FAM220A     | 0           | 0.797315265 | 0.666 | 0.374 | 0           | 1.780748663 | spermatid      | FAM220A     |
| SLC6A16     | 0           | 0.797209339 | 0.924 | 0.303 | 0           | 3.04950495  | spermatocyte   | SLC6A16     |
| TRBC1       | 5.24E-61    | 0.797168436 | 0.184 | 0.004 | 3.22E-56    | 4.60E+01    | T_cells        | TRBC1       |
| FBXO211     | 2.30E-109   | 0.79711222  | 0.375 | 0.197 | 1.41E-104   | 1.90E+00    | Sertoli_cells  | FBXO21      |
| C5orf58     | 1.71E-148   | 0.796865012 | 0.254 | 0.133 | 1.05E-143   | 1.91E+00    | spermatogonia  | C5orf58     |
| RPL38       | 6.63E-116   | 0.796804206 | 0.96  | 0.923 | 4.07E-111   | 1.04E+00    | VSM_cells      | RPL3        |
| BMPR2       | 3.51E-140   | 0.796786598 | 0.481 | 0.106 | 2.15E-135   | 4.54E+00    | endotheliocyte | BMPR2       |
| CDKN3       | 0           | 0.796593576 | 0.984 | 0.634 | 0           | 1.552050473 | spermatocyte   | CDKN3       |
| AMN1        | 0           | 0.796108549 | 0.915 | 0.343 | 0           | 2.667638484 | spermatocyte   | AMN1        |
| MT-CO13     | 1.01E-220   | 0.795928933 | 0.791 | 0.436 | 6.18E-216   | 1.81E+00    | PTM_cells      | MT-CO1      |
| RPS174      | 5.08E-218   | 0.795874524 | 0.812 | 0.457 | 3.12E-213   | 1.78E+00    | PTM_cells      | RPS17       |
| PFN13       | 1.57E-86    | 0.795796228 | 0.725 | 0.404 | 9.64E-82    | 1.79E+00    | VSM_cells      | PFN1        |
| CITED21     | 0           | 0.795700805 | 0.379 | 0.056 | 0           | 6.767857143 | Leydig_cells   | CITED2      |
| COL1A22     | 1.04E-157   | 0.795617329 | 0.402 | 0.168 | 6.37E-153   | 2.39E+00    | Sertoli_cells  | COL1A2      |
| PSENN       | 0           | 0.795591652 | 0.956 | 0.391 | 0           | 2.445012788 | spermatocyte   | PSENN       |
| FOSL21      | 7.02E-83    | 0.795504176 | 0.3   | 0.052 | 4.30E-78    | 5.77E+00    | macrophages    | FOSL2       |
| HLA-C2      | 1.36E-190   | 0.79502727  | 0.473 | 0.165 | 8.34E-186   | 2.87E+00    | Leydig_cells   | HLA-C       |
| LCP2        | 0           | 0.794368309 | 0.263 | 0.009 | 0           | 29.22222222 | macrophages    | LCP2        |
| HLA-DPA1    | 0           | 0.793741209 | 0.514 | 0.02  | 0           | 25.7        | endotheliocyte | HLA-DPA1    |
| AC005754.7  | 0           | 0.79358357  | 0.868 | 0.273 | 0           | 3.179487179 | spermatocyte   | AC005754.7  |
| S100A103    | 0.002599307 | 0.793568031 | 0.553 | 0.44  | 1           | 1.256818182 | T_cells        | S100A10     |
| RPS3A4      | 7.56E-11    | 0.793458674 | 0.921 | 0.898 | 4.64E-06    | 1.03E+00    | T_cells        | RPS3A       |
| HNRNPM      | 0           | 0.793300282 | 0.722 | 0.341 | 0           | 2.117302053 | spermatogonia  | HNRNPM      |
| LAT         | 1.04E-86    | 0.793237199 | 0.289 | 0.008 | 6.38E-82    | 3.61E+01    | T_cells        | LAT         |
| CDC14A      | 0           | 0.79314855  | 0.564 | 0.185 | 0           | 3.048648649 | spermatid      | CDC14A      |
| LITAF       | 7.53E-48    | 0.793143014 | 0.316 | 0.089 | 4.62E-43    | 3.55E+00    | macrophages    | LITAF       |
| USP25       | 0           | 0.792482988 | 0.607 | 0.289 | 0           | 2.100346021 | spermatid      | USP25       |
| MAFF        | 1.27E-235   | 0.792394078 | 0.471 | 0.062 | 7.80E-231   | 7.60E+00    | endotheliocyte | MAFF        |
| CALR        | 0           | 0.792259665 | 0.714 | 0.458 | 0           | 1.558951965 | spermatogonia  | CALR        |
| CLDN1       | 6.65E-290   | 0.792210368 | 0.232 | 0.009 | 4.08E-285   | 2.58E+01    | macrophages    | CLDN1       |
| ABCA9       | 0           | 0.791948032 | 0.303 | 0.022 | 0           | 13.77272727 | Leydig_cells   | ABCA9       |
| IGFBP62     | 2.67E-175   | 0.791505048 | 0.474 | 0.091 | 1.64E-170   | 5.21E+00    | VSM_cells      | IGFBP6      |
| ACE2        | 0           | 0.791502803 | 0.279 | 0.01  | 0           | 27.9        | Sertoli_cells  | ACE2        |
| SLC2A5      | 0           | 0.790958492 | 0.837 | 0.233 | 0           | 3.592274678 | spermatocyte   | SLC2A5      |

|              |             |             |       |       |             |             |                |              |
|--------------|-------------|-------------|-------|-------|-------------|-------------|----------------|--------------|
| RP11-545G3.1 | 0           | 0.790936163 | 0.405 | 0.203 | 0           | 1.995073892 | spermatid      | RP11-545G3.1 |
| TRIM42       | 0           | 0.790926298 | 0.511 | 0.087 | 0           | 5.873563218 | spermatid      | TRIM42       |
| PPP2R2B      | 0           | 0.790893865 | 0.524 | 0.09  | 0           | 5.822222222 | spermatid      | PPP2R2B      |
| RPL31        | 9.81E-43    | 0.790879041 | 0.933 | 0.838 | 6.02E-38    | 1.11E+00    | endotheliocyte | RPL31        |
| SORL1        | 0           | 0.790738363 | 0.372 | 0.048 | 0           | 7.75        | Leydig_cells   | SORL1        |
| LHX9         | 0           | 0.790721506 | 0.335 | 0.028 | 0           | 11.96428571 | Leydig_cells   | LHX9         |
| NFKBIZ2      | 4.55E-204   | 0.790719327 | 0.377 | 0.097 | 2.79E-199   | 3.89E+00    | Leydig_cells   | NFKBIZ       |
| ADAMTS12     | 0           | 0.790507748 | 0.465 | 0.072 | 0           | 6.458333333 | PTM_cells      | ADAMTS1      |
| C12orf571    | 4.84E-188   | 0.790445171 | 0.697 | 0.448 | 2.97E-183   | 1.56E+00    | PTM_cells      | C12orf57     |
| SPI1         | 4.98E-89    | 0.790369075 | 0.327 | 0.06  | 3.05E-84    | 5.45E+00    | macrophages    | SPI1         |
| CD302        | 2.21E-18    | 0.790315029 | 0.38  | 0.235 | 1.36E-13    | 1.62E+00    | macrophages    | CD302        |
| OAZ11        | 6.76E-107   | 0.790305088 | 0.669 | 0.614 | 4.15E-102   | 1.09E+00    | Sertoli_cells  | OAZ1         |
| OSCP1        | 0           | 0.789844951 | 0.949 | 0.398 | 0           | 2.384422111 | spermatocyte   | OSCP1        |
| PAGE1        | 0           | 0.789814153 | 0.339 | 0.015 | 0           | 22.6        | spermatogonia  | PAGE1        |
| HBEGF        | 0           | 0.789752411 | 0.414 | 0.037 | 0           | 11.18918919 | endotheliocyte | HBEGF        |
| CEBPB1       | 1.75E-279   | 0.789710306 | 0.478 | 0.063 | 1.08E-274   | 7.59E+00    | VSM_cells      | CEBPB        |
| RPL262       | 1.10E-181   | 0.789623966 | 0.892 | 0.749 | 6.73E-177   | 1.19E+00    | Leydig_cells   | RPL26        |
| CIRBP3       | 1.24E-234   | 0.789576066 | 0.787 | 0.431 | 7.62E-230   | 1.83E+00    | PTM_cells      | CIRBP        |
| IER5L2       | 0.001316623 | 0.789498528 | 0.184 | 0.064 | 1           | 2.875       | T_cells        | IER5L        |
| RCS1         | 0           | 0.789397167 | 0.253 | 0.008 | 0           | 31.625      | macrophages    | RCS1         |
| MT-CYB1      | 1.14E-62    | 0.789311383 | 0.73  | 0.393 | 6.97E-58    | 1.86E+00    | endotheliocyte | MT-CYB       |
| SLFNL1       | 0           | 0.789163442 | 0.535 | 0.135 | 0           | 3.962962963 | spermatid      | SLFNL1       |
| SLA1         | 6.85E-154   | 0.7891608   | 0.263 | 0.003 | 4.20E-149   | 8.77E+01    | T_cells        | SLA          |
| WBP51        | 0           | 0.789153783 | 0.506 | 0.078 | 0           | 6.487179487 | PTM_cells      | WBP5         |
| VAPA         | 0           | 0.788878781 | 0.661 | 0.269 | 0           | 2.457249071 | spermatogonia  | VAPA         |
| SLPI         | 0           | 0.788451621 | 0.439 | 0.106 | 0           | 4.141509434 | spermatid      | SLPI         |
| BHLHE401     | 1.43E-84    | 0.788213262 | 0.296 | 0.05  | 8.79E-80    | 5.92E+00    | macrophages    | BHLHE40      |
| LINC00643    | 0           | 0.788110399 | 0.676 | 0.252 | 0           | 2.682539683 | spermatocyte   | LINC00643    |
| CYB5A        | 5.40E-276   | 0.787816304 | 0.489 | 0.132 | 3.31E-271   | 3.70E+00    | Leydig_cells   | CYB5A        |
| TMEM147      | 0           | 0.787631145 | 0.63  | 0.352 | 0           | 1.789772727 | spermatogonia  | TMEM147      |
| MT-CO31      | 9.27E-219   | 0.787165628 | 0.794 | 0.453 | 5.69E-214   | 1.75E+00    | PTM_cells      | MT-CO3       |
| CEP85L       | 0           | 0.786927103 | 0.707 | 0.47  | 0           | 1.504255319 | spermatid      | CEP85L       |
| EMILIN1      | 0           | 0.786916824 | 0.425 | 0.018 | 0           | 23.61111111 | PTM_cells      | EMILIN1      |
| LINC00301    | 0           | 0.786762166 | 0.916 | 0.431 | 0           | 2.125290023 | spermatocyte   | LINC00301    |
| RNF38        | 0           | 0.786718382 | 0.707 | 0.508 | 0           | 1.391732283 | spermatid      | RNF38        |
| SLC25A31     | 0           | 0.786515076 | 0.469 | 0.205 | 0           | 2.287804878 | spermatogonia  | SLC25A31     |
| GABARAPL2    | 0           | 0.786422563 | 0.696 | 0.394 | 0           | 1.766497462 | spermatogonia  | GABARAPL2    |
| RPL81        | 5.86E-225   | 0.78635965  | 0.935 | 0.852 | 3.60E-220   | 1.10E+00    | Leydig_cells   | RPL8         |
| RPL72        | 2.44E-99    | 0.786116018 | 0.888 | 0.795 | 1.50E-94    | 1.12E+00    | VSM_cells      | RPL7         |
| RPL27A2      | 2.32E-217   | 0.785614658 | 0.903 | 0.782 | 1.42E-212   | 1.15E+00    | Leydig_cells   | RPL27A       |
| CFAP53       | 0           | 0.78545429  | 0.982 | 0.514 | 0           | 1.910505837 | spermatocyte   | CFAP53       |
| NGFR         | 0           | 0.785346827 | 0.275 | 0.017 | 0           | 16.17647059 | Leydig_cells   | NGFR         |
| UBQLNL       | 0           | 0.78529717  | 0.512 | 0.105 | 0           | 4.876190476 | spermatid      | UBQLNL       |
| SRSF5        | 1.62E-75    | 0.785247979 | 0.844 | 0.598 | 9.91E-71    | 1.41E+00    | endotheliocyte | SRSF5        |
| CD99         | 3.08E-150   | 0.785141545 | 0.707 | 0.189 | 1.89E-145   | 3.74E+00    | endotheliocyte | CD99         |
| RPL365       | 2.29E-07    | 0.784840341 | 0.842 | 0.702 | 0.014045804 | 1.199430199 | T_cells        | RPL36        |
| RAB341       | 0           | 0.784656359 | 0.49  | 0.042 | 0           | 11.66666667 | PTM_cells      | RAB34        |
| HPCAL1       | 3.26E-85    | 0.784559282 | 0.361 | 0.214 | 2.00E-80    | 1.69E+00    | Sertoli_cells  | HPCAL1       |
| PFKP         | 0           | 0.784553278 | 0.985 | 0.498 | 0           | 1.977911647 | spermatocyte   | PFKP         |
| PEG31        | 7.33E-177   | 0.784444374 | 0.563 | 0.262 | 4.50E-172   | 2.15E+00    | PTM_cells      | PEG3         |
| TCF3         | 0           | 0.7843766   | 0.317 | 0.074 | 0           | 4.283783784 | spermatogonia  | TCF3         |
| HDAC11       | 0           | 0.784266148 | 0.619 | 0.276 | 0           | 2.242753623 | spermatid      | HDAC11       |
| AHSA1        | 1.11E-54    | 0.783983083 | 0.467 | 0.409 | 6.84E-50    | 1.14E+00    | Sertoli_cells  | AHSA1        |
| CIR1         | 0           | 0.783901929 | 0.917 | 0.358 | 0           | 2.561452514 | spermatocyte   | CIR1         |
| ECE1         | 3.26E-226   | 0.783679487 | 0.506 | 0.074 | 2.00E-221   | 6.84E+00    | endotheliocyte | ECE1         |
| IFITM1       | 0           | 0.78367503  | 0.454 | 0.021 | 0           | 21.61904762 | endotheliocyte | IFITM1       |
| RPL274       | 7.89E-94    | 0.783667819 | 0.852 | 0.659 | 4.84E-89    | 1.29E+00    | VSM_cells      | RPL27        |
| CYB5R3       | 1.43E-189   | 0.783653443 | 0.548 | 0.217 | 8.75E-185   | 2.53E+00    | Leydig_cells   | CYB5R3       |
| PDXK         | 0           | 0.783560607 | 0.995 | 0.725 | 0           | 1.372413793 | spermatocyte   | PDXK         |
| RGS11        | 6.44E-30    | 0.783382489 | 0.2   | 0.013 | 3.95E-25    | 1.54E+01    | mastocyte      | RGS1         |
| JMJD1C2      | 2.87E-19    | 0.782828583 | 0.515 | 0.369 | 1.76E-14    | 1.40E+00    | macrophages    | JMJD1C       |
| RPS184       | 7.80E-99    | 0.782823472 | 0.928 | 0.852 | 4.78E-94    | 1.09E+00    | VSM_cells      | RPS18        |
| MPST         | 0           | 0.782156037 | 0.89  | 0.302 | 0           | 2.947019868 | spermatocyte   | MPST         |
| DST          | 2.05E-66    | 0.781872655 | 0.619 | 0.342 | 1.26E-61    | 1.81E+00    | VSM_cells      | DST          |
| LRRCC1       | 0           | 0.781689296 | 0.95  | 0.372 | 0           | 2.553763441 | spermatocyte   | LRRCC1       |
| 12-Sep       | 0           | 0.781270542 | 0.949 | 0.353 | 0           | 2.688385269 | spermatocyte   | 12-Sep       |
| ESPN         | 1.39E-78    | 0.781185282 | 0.354 | 0.215 | 8.51E-74    | 1.65E+00    | Sertoli_cells  | ESPN         |
| VSIG1        | 0           | 0.78091698  | 0.271 | 0.023 | 0           | 11.7826087  | Sertoli_cells  | VSIG1        |
| KLF93        | 9.48E-114   | 0.780603699 | 0.503 | 0.153 | 5.82E-109   | 3.29E+00    | VSM_cells      | KLF9         |
| BOLL         | 0           | 0.780509508 | 0.925 | 0.347 | 0           | 2.665706052 | spermatocyte   | BOLL         |
| EPCAM        | 0           | 0.780500158 | 0.461 | 0.09  | 0           | 5.122222222 | spermatogonia  | EPCAM        |
| GIMAP41      | 1.04E-35    | 0.780371688 | 0.237 | 0.012 | 6.38E-31    | 1.98E+01    | T_cells        | GIMAP4       |
| THBS1        | 0           | 0.7801954   | 0.241 | 0.011 | 0           | 21.90909091 | VSM_cells      | THBS1        |
| ATRX2        | 0           | 0.779961879 | 0.541 | 0.13  | 0           | 4.161538462 | PTM_cells      | ATRX         |
| RBM25        | 0           | 0.779877466 | 0.729 | 0.435 | 0           | 1.675862069 | spermatogonia  | RBM25        |



|               |           |             |       |       |             |             |                |               |
|---------------|-----------|-------------|-------|-------|-------------|-------------|----------------|---------------|
| YTHDF2        | 0         | 0.779827914 | 0.598 | 0.185 | 0           | 3.232432432 | spermatogonia  | YTHDF2        |
| HPGDS         | 1.14E-49  | 0.779695455 | 0.1   | 0.002 | 6.99E-45    | 5.00E+01    | mastocyte      | HPGDS         |
| NXF3          | 0         | 0.779576132 | 0.266 | 0.009 | 0           | 29.55555556 | Sertoli_cells  | NXF3          |
| ATP5E         | 0         | 0.779520986 | 0.825 | 0.627 | 0           | 1.315789474 | spermatogonia  | ATP5E         |
| FLJ27354      | 0         | 0.778996946 | 0.491 | 0.141 | 0           | 3.482269504 | spermatid      | FLJ27354      |
| ATG9A         | 0         | 0.778994404 | 0.885 | 0.276 | 0           | 3.206521739 | spermatocyte   | ATG9A         |
| TEX43         | 0         | 0.778669287 | 0.457 | 0.127 | 0           | 3.598425197 | spermatid      | TEX43         |
| 07-Sep        | 5.71E-80  | 0.778573474 | 0.846 | 0.654 | 3.50E-75    | 1.29E+00    | VSM_cells      | 07-Sep        |
| CD47          | 0         | 0.778101276 | 0.834 | 0.233 | 0           | 3.579399142 | spermatocyte   | CD47          |
| RBM17         | 0         | 0.778002701 | 0.7   | 0.392 | 0           | 1.785714286 | spermatogonia  | RBM17         |
| SYNE23        | 2.64E-07  | 0.77792362  | 0.395 | 0.135 | 0.016195589 | 2.925925926 | T_cells        | SYNE2         |
| NUPR1         | 0         | 0.777878098 | 0.562 | 0.12  | 0           | 4.683333333 | Leydig_cells   | NUPR1         |
| C3orf30       | 0         | 0.777791644 | 0.571 | 0.223 | 0           | 2.560538117 | spermatid      | C3orf30       |
| SERPINB9      | 1.06E-104 | 0.777777164 | 0.253 | 0.03  | 6.51E-100   | 8.43E+00    | macrophages    | SERPINB9      |
| AEBP12        | 1.43E-208 | 0.777477454 | 0.505 | 0.087 | 8.76E-204   | 5.80E+00    | VSM_cells      | AEBP1         |
| 01-Jun        | 2.24E-38  | 0.7774439   | 0.653 | 0.368 | 1.38E-33    | 1.77E+00    | macrophages    | JUN           |
| KIAA0355      | 8.86E-151 | 0.777259487 | 0.506 | 0.112 | 5.43E-146   | 4.52E+00    | endotheliocyte | KIAA0355      |
| PTGIS         | 2.30E-252 | 0.777248539 | 0.38  | 0.038 | 1.41E-247   | 1.00E+01    | endotheliocyte | PTGIS         |
| FKBP2         | 0         | 0.777231105 | 0.647 | 0.399 | 0           | 1.621553885 | spermatogonia  | FKBP2         |
| ALS2CR11      | 0         | 0.777151678 | 0.961 | 0.382 | 0           | 2.515706806 | spermatocyte   | ALS2CR11      |
| RPL7A2        | 7.85E-100 | 0.777130911 | 0.937 | 0.878 | 4.82E-95    | 1.07E+00    | VSM_cells      | RPL7A         |
| S100A16       | 0         | 0.777005024 | 0.551 | 0.061 | 0           | 9.032786885 | endotheliocyte | S100A16       |
| VRK1          | 0         | 0.776950003 | 0.566 | 0.219 | 0           | 2.584474886 | spermatogonia  | VRK1          |
| FAM133A       | 3.10E-141 | 0.776905483 | 0.272 | 0.094 | 1.90E-136   | 2.89E+00    | Sertoli_cells  | FAM133A       |
| CA2           | 0         | 0.776761638 | 0.474 | 0.097 | 0           | 4.886597938 | spermatid      | CA2           |
| PLCB4         | 0         | 0.776598785 | 0.409 | 0.021 | 0           | 19.47619048 | endotheliocyte | PLCB4         |
| CCT3          | 0         | 0.776397474 | 0.791 | 0.517 | 0           | 1.529980658 | spermatogonia  | CCT3          |
| CPM           | 2.44E-135 | 0.776142731 | 0.376 | 0.076 | 1.50E-130   | 4.95E+00    | VSM_cells      | CPM           |
| KIAA1211      | 0         | 0.776113315 | 0.489 | 0.121 | 0           | 4.041322314 | spermatid      | KIAA1211      |
| XAF11         | 1.18E-70  | 0.775852117 | 0.259 | 0.045 | 7.23E-66    | 5.76E+00    | macrophages    | XAF1          |
| RPLP01        | 5.42E-88  | 0.775654602 | 0.901 | 0.739 | 3.33E-83    | 1.22E+00    | endotheliocyte | RPLP0         |
| USMG5         | 1.61E-17  | 0.775620399 | 0.501 | 0.558 | 9.85E-13    | 8.98E-01    | Sertoli_cells  | USMG5         |
| TGM2          | 0         | 0.775576585 | 0.328 | 0.022 | 0           | 14.90909091 | endotheliocyte | TGM2          |
| CCL31         | 1.24E-17  | 0.774753077 | 0.211 | 0.019 | 7.59E-13    | 1.11E+01    | T_cells        | CCL3          |
| SYCE3         | 0         | 0.774559661 | 0.901 | 0.38  | 0           | 2.371052632 | spermatocyte   | SYCE3         |
| RB1CC1        | 0         | 0.774351617 | 0.69  | 0.453 | 0           | 1.523178808 | spermatogonia  | RB1CC1        |
| FAM24A        | 0         | 0.77420314  | 0.47  | 0.114 | 0           | 4.122807018 | spermatocyte   | FAM24A        |
| COL6A22       | 4.59E-195 | 0.773932177 | 0.573 | 0.117 | 2.81E-190   | 4.90E+00    | VSM_cells      | COL6A2        |
| C11orf88      | 0         | 0.773572172 | 0.812 | 0.217 | 0           | 3.741935484 | spermatocyte   | C11orf88      |
| CHSY1         | 0         | 0.77354931  | 0.369 | 0.06  | 0           | 6.15        | Leydig_cells   | CHSY1         |
| PAGE5         | 0         | 0.773484376 | 0.374 | 0.09  | 0           | 4.155555556 | spermatogonia  | PAGE5         |
| RPS112        | 4.58E-244 | 0.773437714 | 0.943 | 0.817 | 2.81E-239   | 1.15E+00    | Leydig_cells   | RPS11         |
| RBM393        | 8.18E-05  | 0.773399341 | 0.632 | 0.479 | 1           | 1.319415449 | T_cells        | RBM39         |
| PPIA7         | 2.94E-05  | 0.77317484  | 0.737 | 0.627 | 1           | 1.175438596 | T_cells        | PPIA          |
| MT.ND4L1      | 1.86E-30  | 0.773072861 | 0.401 | 0.169 | 1.14E-25    | 2.37E+00    | macrophages    | MT.ND4L       |
| CH17-140K24.2 | 0         | 0.772721818 | 0.562 | 0.21  | 0           | 2.676190476 | spermatocyte   | CH17-140K24.2 |
| RPS94         | 1.28E-94  | 0.772693186 | 0.907 | 0.837 | 7.86E-90    | 1.08E+00    | VSM_cells      | RPS9          |
| SEC621        | 1.03E-156 | 0.772689415 | 0.68  | 0.424 | 6.35E-152   | 1.60E+00    | Leydig_cells   | SEC62         |
| LTBP2         | 0         | 0.772630065 | 0.426 | 0.022 | 0           | 19.36363636 | PTM_cells      | LTBP2         |
| SPZ1          | 0         | 0.772603911 | 0.596 | 0.207 | 0           | 2.879227053 | spermatid      | SPZ1          |
| RPS15A2       | 2.11E-223 | 0.772583396 | 0.896 | 0.78  | 1.30E-218   | 1.15E+00    | PTM_cells      | RPS15A        |
| NCOA7         | 1.82E-217 | 0.772464641 | 0.414 | 0.053 | 1.12E-212   | 7.81E+00    | endotheliocyte | NCOA7         |
| RPS15A1       | 1.51E-189 | 0.772344232 | 0.912 | 0.78  | 9.29E-185   | 1.17E+00    | Leydig_cells   | RPS15A        |
| APLNR         | 0         | 0.772324567 | 0.29  | 0.001 | 0           | 290         | endotheliocyte | APLNR         |
| MT-ND13       | 5.07E-223 | 0.772170017 | 0.773 | 0.392 | 3.11E-218   | 1.97E+00    | PTM_cells      | MT-ND1        |
| PLAT          | 1.65E-140 | 0.772160952 | 0.233 | 0.025 | 1.01E-135   | 9.32E+00    | endotheliocyte | PLAT          |
| RPS284        | 9.94E-126 | 0.772126176 | 0.711 | 0.604 | 6.10E-121   | 1.18E+00    | Sertoli_cells  | RPS28         |
| NFIB1         | 0         | 0.772108744 | 0.395 | 0.062 | 0           | 6.370967742 | Leydig_cells   | NFIB          |
| TNFAIP81      | 4.17E-20  | 0.771953355 | 0.316 | 0.038 | 2.56E-15    | 8.32E+00    | T_cells        | TNFAIP8       |
| GGN           | 0         | 0.771885208 | 0.958 | 0.37  | 0           | 2.589189189 | spermatocyte   | GGN           |
| FTH14         | 2.15E-93  | 0.771856872 | 0.903 | 0.72  | 1.32E-88    | 1.25E+00    | VSM_cells      | FTH1          |
| DPCD          | 0         | 0.771811601 | 0.957 | 0.488 | 0           | 1.961065574 | spermatocyte   | DPCD          |
| ART3          | 0         | 0.771808078 | 0.541 | 0.335 | 0           | 1.614925373 | spermatogonia  | ART3          |
| PRDX5         | 0         | 0.771544297 | 0.728 | 0.494 | 0           | 1.473684211 | spermatogonia  | PRDX5         |
| AQP5          | 0         | 0.771495093 | 0.992 | 0.637 | 0           | 1.557299843 | spermatocyte   | AQP5          |
| PODN1         | 0         | 0.771203517 | 0.457 | 0.029 | 0           | 15.75862069 | PTM_cells      | PODN          |
| TBX18-AS1     | 0         | 0.770976012 | 0.387 | 0.2   | 0           | 1.935       | spermatid      | TBX18-AS1     |
| RPS143        | 2.90E-241 | 0.770948435 | 0.923 | 0.827 | 1.78E-236   | 1.12E+00    | PTM_cells      | RPS14         |
| MT.ND43       | 6.53E-06  | 0.770921647 | 0.349 | 0.376 | 0.400469526 | 0.928191489 | Sertoli_cells  | MT.ND4        |
| IFITM34       | 1.08E-190 | 0.770556616 | 0.751 | 0.188 | 6.65E-186   | 3.99E+00    | VSM_cells      | IFITM3        |
| RPS23P81      | 4.40E-21  | 0.770471852 | 0.293 | 0.221 | 2.70E-16    | 1.33E+00    | Leydig_cells   | RPS23P8       |
| RBPJ1         | 2.06E-17  | 0.770449942 | 0.519 | 0.395 | 1.26E-12    | 1.31E+00    | macrophages    | RBPJ          |
| NAT8L         | 0         | 0.770213668 | 0.271 | 0.011 | 0           | 24.63636364 | Sertoli_cells  | NAT8L         |
| DNMT1         | 0         | 0.770211295 | 0.583 | 0.268 | 0           | 2.175373134 | spermatogonia  | DNMT1         |
| PNRC13        | 5.26E-220 | 0.770203122 | 0.704 | 0.383 | 3.23E-215   | 1.84E+00    | PTM_cells      | PNRC1         |

|               |             |             |       |       |             |             |                |               |
|---------------|-------------|-------------|-------|-------|-------------|-------------|----------------|---------------|
| KIF2C         | 0           | 0.770028326 | 0.704 | 0.463 | 0           | 1.520518359 | spermatid      | KIF2C         |
| HSPE1         | 0           | 0.770015152 | 0.566 | 0.216 | 0           | 2.62037037  | spermatogonia  | HSPE1         |
| PRM3          | 0           | 0.769970811 | 0.549 | 0.213 | 0           | 2.577464789 | spermatid      | PRM3          |
| ACTRT3        | 0           | 0.769918747 | 0.648 | 0.366 | 0           | 1.770491803 | spermatid      | ACTRT3        |
| RP6.91H8.2    | 0           | 0.769881806 | 0.354 | 0.119 | 0           | 2.974789916 | spermatocyte   | RP6.91H8.2    |
| MT-ND35       | 1.43E-20    | 0.769838972 | 0.431 | 0.372 | 8.78E-16    | 1.16E+00    | Sertoli_cells  | MT-ND3        |
| SEMA3D        | 3.14E-216   | 0.769823232 | 0.411 | 0.112 | 1.92E-211   | 3.67E+00    | Leydig_cells   | SEMA3D        |
| PDE7A         | 0.000735354 | 0.76974632  | 0.263 | 0.115 | 1           | 2.286956522 | T_cells        | PDE7A         |
| USP44         | 0           | 0.769308662 | 0.933 | 0.308 | 0           | 3.029220779 | spermatocyte   | USP44         |
| ADAM28        | 0           | 0.769079839 | 0.269 | 0.007 | 0           | 38.42857143 | macrophages    | ADAM28        |
| FSTL11        | 0           | 0.768984311 | 0.504 | 0.062 | 0           | 8.129032258 | PTM_cells      | FSTL1         |
| PPP1CA        | 1.59E-07    | 0.76897123  | 0.342 | 0.102 | 0.009740752 | 3.352941176 | T_cells        | PPP1CA        |
| FYN           | 4.04E-07    | 0.768760864 | 0.263 | 0.069 | 0.024776062 | 3.811594203 | T_cells        | FYN           |
| CSTB          | 2.21E-257   | 0.768535635 | 0.534 | 0.16  | 1.36E-252   | 3.34E+00    | Leydig_cells   | CSTB          |
| SMARCA5       | 0           | 0.768490301 | 0.675 | 0.366 | 0           | 1.844262295 | spermatogonia  | SMARCA5       |
| DDB1          | 0           | 0.768398306 | 0.594 | 0.182 | 0           | 3.263736264 | spermatogonia  | DDB1          |
| B4GALT11      | 9.70E-82    | 0.768107262 | 0.324 | 0.177 | 5.95E-77    | 1.83E+00    | Sertoli_cells  | B4GALT1       |
| JAML          | 0           | 0.767992697 | 0.246 | 0.008 | 0           | 30.75       | macrophages    | JAML          |
| ISLR          | 4.96E-208   | 0.76788729  | 0.476 | 0.069 | 3.04E-203   | 6.90E+00    | endotheliocyte | ISLR          |
| C6orf48       | 0           | 0.767839622 | 0.956 | 0.509 | 0           | 1.878192534 | spermatocyte   | C6orf48       |
| ANKLE2        | 0           | 0.767728335 | 0.923 | 0.336 | 0           | 2.74702381  | spermatocyte   | ANKLE2        |
| FNBP1         | 9.62E-07    | 0.767501994 | 0.342 | 0.116 | 0.059009181 | 2.948275862 | T_cells        | FNBP1         |
| ABI3BP1       | 0           | 0.767373732 | 0.358 | 0.042 | 0           | 8.523809524 | Leydig_cells   | ABI3BP        |
| MORF4L1       | 0           | 0.767218603 | 0.995 | 0.781 | 0           | 1.274007682 | spermatocyte   | MORF4L1       |
| DUSP14        | 1.44E-130   | 0.767027131 | 0.603 | 0.179 | 8.85E-126   | 3.37E+00    | VSM_cells      | DUSP1         |
| RP11-322N21.2 | 0           | 0.766608579 | 0.376 | 0.189 | 0           | 1.989417989 | spermatid      | RP11-322N21.2 |
| FAM127A       | 0           | 0.766511531 | 0.408 | 0.066 | 0           | 6.181818182 | Leydig_cells   | FAM127A       |
| ECE1          | 1.78E-276   | 0.76633047  | 0.355 | 0.068 | 1.09E-271   | 5.22E+00    | Leydig_cells   | ECE1          |
| ATRX4         | 0.000126673 | 0.766207336 | 0.342 | 0.15  | 1           | 2.28        | T_cells        | ATRX          |
| ITGA6         | 5.46E-79    | 0.766206465 | 0.489 | 0.173 | 3.35E-74    | 2.83E+00    | endotheliocyte | ITGA6         |
| RPS292        | 9.91E-264   | 0.766176124 | 0.868 | 0.888 | 6.08E-259   | 9.77E-01    | Sertoli_cells  | RPS29         |
| SUPT16H       | 0           | 0.765966376 | 0.676 | 0.37  | 0           | 1.827027027 | spermatogonia  | SUPT16H       |
| COLEC12       | 0           | 0.765915536 | 0.322 | 0.034 | 0           | 9.470588235 | Leydig_cells   | COLEC12       |
| ZNF689        | 0           | 0.765890717 | 0.78  | 0.222 | 0           | 3.513513514 | spermatocyte   | ZNF689        |
| ZNF677        | 0           | 0.765809137 | 0.629 | 0.42  | 0           | 1.497619048 | spermatid      | ZNF677        |
| HBA2          | 8.06E-05    | 0.765807524 | 0.048 | 0.061 | 1           | 0.786885246 | spermatid      | HBA2          |
| MT.ND23       | 5.10E-05    | 0.765358541 | 0.349 | 0.388 | 1           | 0.899484536 | Sertoli_cells  | MT.ND2        |
| TGFB111       | 0           | 0.765345892 | 0.487 | 0.038 | 0           | 12.81578947 | PTM_cells      | TGFB111       |
| COX5B         | 8.02E-59    | 0.76494934  | 0.579 | 0.576 | 4.92E-54    | 1.01E+00    | Sertoli_cells  | COX5B         |
| ALDH2         | 4.47E-247   | 0.764930526 | 0.294 | 0.07  | 2.74E-242   | 4.20E+00    | Sertoli_cells  | ALDH2         |
| HNRNPK        | 0           | 0.764792169 | 0.778 | 0.49  | 0           | 1.587755102 | spermatogonia  | HNRNPK        |
| NDUFA8        | 0           | 0.764760892 | 0.963 | 0.503 | 0           | 1.914512922 | spermatocyte   | NDUFA8        |
| CMA1          | 2.41E-301   | 0.7645633   | 0.16  | 0.001 | 1.48E-296   | 1.60E+02    | mastocyte      | CMA1          |
| CRTAP3        | 9.29E-201   | 0.764558069 | 0.526 | 0.102 | 5.70E-196   | 5.16E+00    | VSM_cells      | CRTAP         |
| GALNT3        | 0           | 0.764298913 | 0.818 | 0.159 | 0           | 5.144654088 | spermatocyte   | GALNT3        |
| CT62          | 0           | 0.764148258 | 0.881 | 0.272 | 0           | 3.238970588 | spermatocyte   | CT62          |
| HNRNPA13      | 2.29E-169   | 0.7639435   | 0.771 | 0.597 | 1.41E-164   | 1.29E+00    | PTM_cells      | HNRNPA1       |
| HLA.DQA11     | 0.008439984 | 0.763915685 | 0.053 | 0.01  | 1           | 5.3         | T_cells        | HLA.DQA1      |
| PSME15        | 0.000152273 | 0.763902396 | 0.263 | 0.098 | 1           | 2.683673469 | T_cells        | PSME1         |
| KLF21         | 2.59E-45    | 0.763720359 | 0.458 | 0.166 | 1.59E-40    | 2.76E+00    | macrophages    | KLF2          |
| AES3          | 3.00E-07    | 0.763716508 | 0.421 | 0.151 | 0.018426338 | 2.78807947  | T_cells        | AES           |
| ARHGAP18      | 3.51E-23    | 0.76362035  | 0.296 | 0.131 | 2.15E-18    | 2.26E+00    | macrophages    | ARHGAP18      |
| HEXIM1        | 7.81E-36    | 0.76353965  | 0.31  | 0.103 | 4.79E-31    | 3.01E+00    | macrophages    | HEXIM1        |
| ARL6IP51      | 9.96E-27    | 0.763525547 | 0.407 | 0.203 | 6.11E-22    | 2.00E+00    | macrophages    | ARL6IP5       |
| CD9           | 5.48E-57    | 0.763428513 | 0.315 | 0.092 | 3.36E-52    | 3.42E+00    | endotheliocyte | CD9           |
| CD96          | 2.58E-111   | 0.763382844 | 0.263 | 0.005 | 1.58E-106   | 5.26E+01    | T_cells        | CD96          |
| GALM          | 0           | 0.763374556 | 0.446 | 0.021 | 0           | 21.23809524 | PTM_cells      | GALM          |
| LRRC34        | 0           | 0.763261931 | 0.8   | 0.193 | 0           | 4.14507772  | spermatocyte   | LRRC34        |
| ARL4A         | 0           | 0.763125345 | 0.99  | 0.698 | 0           | 1.418338109 | spermatocyte   | ARL4A         |
| PSMB91        | 6.85E-11    | 0.763087272 | 0.237 | 0.038 | 4.20E-06    | 6.24E+00    | T_cells        | PSMB9         |
| TACC14        | 2.03E-117   | 0.762644587 | 0.605 | 0.204 | 1.25E-112   | 2.97E+00    | VSM_cells      | TACC1         |
| FAM173A       | 0           | 0.762595866 | 0.876 | 0.352 | 0           | 2.488636364 | spermatocyte   | FAM173A       |
| RPS263        | 7.94E-155   | 0.762588232 | 0.735 | 0.528 | 4.87E-150   | 1.39E+00    | PTM_cells      | RPS26         |
| ITGAM         | 0           | 0.762576782 | 0.249 | 0.004 | 0           | 62.25       | macrophages    | ITGAM         |
| GATA3         | 6.38E-147   | 0.762545632 | 0.289 | 0.004 | 3.91E-142   | 7.23E+01    | T_cells        | GATA3         |
| TXN2          | 7.48E-259   | 0.762137437 | 0.616 | 0.246 | 4.59E-254   | 2.50E+00    | PTM_cells      | TXN           |
| SH3KBP1       | 2.12E-78    | 0.762017485 | 0.3   | 0.054 | 1.30E-73    | 5.56E+00    | macrophages    | SH3KBP1       |
| RPL23A2       | 1.85E-206   | 0.761642771 | 0.879 | 0.73  | 1.14E-201   | 1.20E+00    | PTM_cells      | RPL23A        |
| SAYS1         | 0           | 0.76164217  | 0.919 | 0.367 | 0           | 2.504087193 | spermatocyte   | SAYS1         |
| TCF41         | 1.41E-115   | 0.761526358 | 0.553 | 0.325 | 8.67E-111   | 1.70E+00    | Leydig_cells   | TCF4          |
| MT1M          | 0           | 0.761410821 | 0.407 | 0.031 | 0           | 13.12903226 | endotheliocyte | MT1M          |
| SLC44A2       | 1.31E-45    | 0.761044018 | 0.352 | 0.26  | 8.01E-41    | 1.35E+00    | Sertoli_cells  | SLC44A2       |
| IQGAP13       | 1.73E-06    | 0.761019824 | 0.421 | 0.174 | 0.106170491 | 2.41954023  | T_cells        | IQGAP1        |
| RPL273        | 5.04E-201   | 0.760833821 | 0.826 | 0.654 | 3.09E-196   | 1.26E+00    | PTM_cells      | RPL27         |
| CYTH4         | 0           | 0.760630859 | 0.236 | 0.002 | 0           | 118         | macrophages    | CYTH4         |

|            |             |             |       |       |             |             |                |           |
|------------|-------------|-------------|-------|-------|-------------|-------------|----------------|-----------|
| GSTM3      | 0           | 0.760506157 | 0.996 | 0.823 | 0           | 1.210206561 | spermatocyte   | GSTM3     |
| IFT57      | 0           | 0.760347544 | 0.865 | 0.7   | 0           | 1.235714286 | spermatid      | IFT57     |
| FAU        | 5.03E-97    | 0.760331971 | 0.933 | 0.836 | 3.08E-92    | 1.12E+00    | endotheliocyte | FAU       |
| RPL294     | 3.27E-09    | 0.760326875 | 0.974 | 0.848 | 0.000200793 | 1.148584906 | T_cells        | RPL29     |
| TSPAN1     | 0           | 0.760268555 | 0.501 | 0.08  | 0           | 6.2625      | spermatid      | TSPAN1    |
| IFITM24    | 1.05E-138   | 0.760034956 | 0.577 | 0.158 | 6.47E-134   | 3.65E+00    | VSM_cells      | IFITM2    |
| AP2S1      | 1.68E-28    | 0.759707844 | 0.434 | 0.43  | 1.03E-23    | 1.01E+00    | Sertoli_cells  | AP2S1     |
| ATP5C1     | 2.90E-29    | 0.759679269 | 0.366 | 0.318 | 1.78E-24    | 1.15E+00    | Sertoli_cells  | ATP5C1    |
| ANKRD44    | 1.42E-07    | 0.759667329 | 0.263 | 0.066 | 0.008718628 | 3.984848485 | T_cells        | ANKRD44   |
| EZR2       | 3.36E-86    | 0.759579888 | 0.393 | 0.239 | 2.06E-81    | 1.64E+00    | Sertoli_cells  | EZR       |
| EEF1D4     | 2.95E-05    | 0.759516267 | 0.737 | 0.63  | 1           | 1.16984127  | T_cells        | EEF1D     |
| C1orf194   | 0           | 0.759000749 | 0.984 | 0.636 | 0           | 1.547169811 | spermatocyte   | C1orf194  |
| SEPW1      | 1.25E-178   | 0.758961736 | 0.751 | 0.523 | 7.70E-174   | 1.44E+00    | PTM_cells      | SEPW1     |
| CLIC12     | 5.70E-139   | 0.7589382   | 0.511 | 0.255 | 3.50E-134   | 2.00E+00    | Leydig_cells   | CLIC1     |
| OVOL1      | 0           | 0.758804266 | 0.827 | 0.23  | 0           | 3.595652174 | spermatocyte   | OVOL1     |
| PITHD1     | 0           | 0.758666359 | 0.614 | 0.211 | 0           | 2.909952607 | spermatogonia  | PITHD1    |
| ACTB       | 1.59E-101   | 0.758601511 | 0.918 | 0.582 | 9.76E-97    | 1.58E+00    | endotheliocyte | ACTB      |
| CYTIP      | 8.70E-240   | 0.758419726 | 0.246 | 0.012 | 5.34E-235   | 2.05E+01    | macrophages    | CYTIP     |
| CD8A       | 4.21E-102   | 0.758287921 | 0.211 | 0.003 | 2.58E-97    | 7.03E+01    | T_cells        | CD8A      |
| CHCHD2     | 0           | 0.758232918 | 0.838 | 0.599 | 0           | 1.398998331 | spermatogonia  | CHCHD2    |
| MT.CYB2    | 2.58E-15    | 0.758099566 | 0.378 | 0.333 | 1.58E-10    | 1.14E+00    | Leydig_cells   | MT.CYB    |
| RPL23AP421 | 4.64E-21    | 0.758080188 | 0.311 | 0.239 | 2.85E-16    | 1.30E+00    | Leydig_cells   | RPL23AP42 |
| PEAR1      | 0           | 0.757469093 | 0.334 | 0.035 | 0           | 9.542857143 | Leydig_cells   | PEAR1     |
| FLNB       | 5.13E-194   | 0.757305674 | 0.459 | 0.073 | 3.15E-189   | 6.29E+00    | endotheliocyte | FLNB      |
| TBC1D21    | 0           | 0.75714488  | 0.639 | 0.26  | 0           | 2.457692308 | spermatid      | TBC1D21   |
| DYNLL2     | 0           | 0.757119601 | 0.733 | 0.561 | 0           | 1.306595365 | spermatid      | DYNLL2    |
| NDN1       | 0           | 0.756873389 | 0.549 | 0.13  | 0           | 4.223076923 | PTM_cells      | NDN       |
| WHSC1L1    | 0.002238302 | 0.756846748 | 0.447 | 0.325 | 1           | 1.375384615 | T_cells        | WHSC1L1   |
| PLIN2      | 1.84E-20    | 0.756619983 | 0.226 | 0.084 | 1.13E-15    | 2.69E+00    | macrophages    | PLIN2     |
| POLR2J     | 0           | 0.756564244 | 0.597 | 0.295 | 0           | 2.023728814 | spermatogonia  | POLR2J    |
| TRMT6      | 0           | 0.756430991 | 0.486 | 0.051 | 0           | 9.529411765 | spermatogonia  | TRMT6     |
| PCSK1N     | 0           | 0.756367161 | 0.302 | 0.06  | 0           | 5.033333333 | spermatogonia  | PCSK1N    |
| BCCIP      | 0           | 0.756067341 | 0.596 | 0.195 | 0           | 3.056410256 | spermatogonia  | BCCIP     |
| RPL92      | 1.33E-300   | 0.755839396 | 0.943 | 0.871 | 8.16E-296   | 1.08E+00    | PTM_cells      | RPL9      |
| C11orf74   | 0           | 0.75574586  | 0.92  | 0.386 | 0           | 2.383419689 | spermatocyte   | C11orf74  |
| IFI27L21   | 1.02E-142   | 0.755502745 | 0.254 | 0.08  | 6.25E-138   | 3.18E+00    | Sertoli_cells  | IFI27L2   |
| CIRBP4     | 4.43E-86    | 0.755424638 | 0.795 | 0.442 | 2.72E-81    | 1.80E+00    | VSM_cells      | CIRBP     |
| PSIP1      | 0           | 0.755195844 | 0.68  | 0.465 | 0           | 1.462365591 | spermatogonia  | PSIP1     |
| CHD5       | 0           | 0.754974141 | 0.59  | 0.252 | 0           | 2.341269841 | spermatid      | CHD5      |
| CELF2      | 4.08E-18    | 0.754745846 | 0.424 | 0.27  | 2.50E-13    | 1.57E+00    | macrophages    | CELF2     |
| RPL13AP52  | 7.72E-58    | 0.754601381 | 0.231 | 0.098 | 4.74E-53    | 2.36E+00    | Leydig_cells   | RPL13AP5  |
| LGALS33    | 9.08E-121   | 0.754252568 | 0.611 | 0.202 | 5.57E-116   | 3.02E+00    | VSM_cells      | LGALS3    |
| MFGE8      | 0           | 0.754155425 | 0.42  | 0.079 | 0           | 5.316455696 | Leydig_cells   | MFGE8     |
| SPARC3     | 6.70E-136   | 0.754093477 | 0.719 | 0.241 | 4.11E-131   | 2.98E+00    | VSM_cells      | SPARC     |
| DPH7       | 0           | 0.753922563 | 0.295 | 0.045 | 0           | 6.555555556 | spermatogonia  | DPH7      |
| ZCCHC24    | 0           | 0.75380006  | 0.35  | 0.056 | 0           | 6.25        | Leydig_cells   | ZCCHC24   |
| SLC25A61   | 4.09E-40    | 0.75379623  | 0.468 | 0.194 | 2.51E-35    | 2.41E+00    | macrophages    | SLC25A6   |
| RAB311     | 0           | 0.753714902 | 0.5   | 0.075 | 0           | 6.666666667 | PTM_cells      | RAB31     |
| C19orf60   | 1.24E-08    | 0.753588219 | 0.368 | 0.106 | 0.000757662 | 3.471698113 | T_cells        | C19orf60  |
| PDLIM5     | 1.52E-93    | 0.753534534 | 0.476 | 0.168 | 9.33E-89    | 2.83E+00    | VSM_cells      | PDLIM5    |
| AP1S21     | 2.50E-57    | 0.75348992  | 0.367 | 0.1   | 1.53E-52    | 3.67E+00    | macrophages    | AP1S2     |
| RHEB       | 0           | 0.753433978 | 0.546 | 0.27  | 0           | 2.022222222 | spermatogonia  | RHEB      |
| BEX5       | 0           | 0.753337469 | 0.235 | 0.01  | 0           | 23.5        | Sertoli_cells  | BEX5      |
| RPL91      | 1.15E-259   | 0.753326822 | 0.958 | 0.871 | 7.08E-255   | 1.10E+00    | Leydig_cells   | RPL9      |
| MT.CO21    | 7.40E-30    | 0.753229823 | 0.576 | 0.333 | 4.54E-25    | 1.73E+00    | macrophages    | MT.CO2    |
| RPL83      | 2.35E-104   | 0.753174251 | 0.928 | 0.854 | 1.44E-99    | 1.09E+00    | VSM_cells      | RPL8      |
| DHX57      | 0           | 0.753129614 | 0.56  | 0.23  | 0           | 2.434782609 | spermatid      | DHX57     |
| PEA15      | 2.02E-08    | 0.753073187 | 0.444 | 0.385 | 0.001237036 | 1.153246753 | macrophages    | PEA15     |
| RPL272     | 2.39E-172   | 0.752920433 | 0.821 | 0.656 | 1.47E-167   | 1.25E+00    | Leydig_cells   | RPL27     |
| 11-Mar     | 0           | 0.75249818  | 0.839 | 0.219 | 0           | 3.831050228 | spermatocyte   | 11-Mar    |
| PELI1      | 6.67E-41    | 0.752385729 | 0.303 | 0.093 | 4.09E-36    | 3.26E+00    | macrophages    | PELI1     |
| PTPN7      | 6.49E-29    | 0.752294971 | 0.263 | 0.019 | 3.98E-24    | 1.38E+01    | T_cells        | PTPN7     |
| CPEB1      | 0           | 0.752046669 | 0.493 | 0.141 | 0           | 3.496453901 | spermatogonia  | CPEB1     |
| YWHAB1     | 8.44E-87    | 0.751892964 | 0.737 | 0.347 | 5.18E-82    | 2.12E+00    | endotheliocyte | YWHAB     |
| PRKAR2A    | 0           | 0.751812355 | 0.708 | 0.544 | 0           | 1.301470588 | spermatid      | PRKAR2A   |
| RPL344     | 4.94E-07    | 0.751750839 | 0.947 | 0.906 | 0.030284926 | 1.045253863 | T_cells        | RPL34     |
| UBE2E3     | 0           | 0.751749705 | 0.572 | 0.221 | 0           | 2.588235294 | spermatogonia  | UBE2E3    |
| FSIP2      | 0           | 0.751521185 | 0.9   | 0.331 | 0           | 2.719033233 | spermatocyte   | FSIP2     |
| FOXO3      | 1.08E-16    | 0.751458037 | 0.286 | 0.143 | 6.64E-12    | 2.00E+00    | macrophages    | FOXO3     |
| STAT3      | 6.19E-78    | 0.751430043 | 0.588 | 0.263 | 3.80E-73    | 2.24E+00    | endotheliocyte | STAT3     |
| CMTM61     | 1.06E-84    | 0.751116794 | 0.329 | 0.182 | 6.53E-80    | 1.81E+00    | Sertoli_cells  | CMTM6     |
| ATP5A1     | 0           | 0.751056118 | 0.728 | 0.458 | 0           | 1.589519651 | spermatogonia  | ATP5A1    |
| NDUFA1     | 1.84E-69    | 0.750645185 | 0.377 | 0.24  | 1.13E-64    | 1.57E+00    | Sertoli_cells  | NDUFA1    |
| TSACC      | 0           | 0.750601501 | 0.999 | 0.919 | 0           | 1.087051143 | spermatocyte   | TSACC     |
| RBM33      | 4.12E-220   | 0.749822748 | 0.595 | 0.212 | 2.53E-215   | 2.81E+00    | Leydig_cells   | RBM3      |

|                |             |             |       |       |             |             |                |               |
|----------------|-------------|-------------|-------|-------|-------------|-------------|----------------|---------------|
| MID1IP1        | 0           | 0.749719879 | 0.258 | 0.041 | 0           | 6.292682927 | Sertoli_cells  | MID1IP1       |
| SLC25A6        | 1.81E-132   | 0.749512323 | 0.663 | 0.19  | 1.11E-127   | 3.49E+00    | endotheliocyte | SLC25A6       |
| TPM43          | 9.03E-79    | 0.748582328 | 0.548 | 0.232 | 5.54E-74    | 2.36E+00    | VSM_cells      | TPM4          |
| RPS210         | 1.87E-51    | 0.74848869  | 0.879 | 0.675 | 1.15E-46    | 1.30E+00    | macrophages    | RPS2          |
| CLU            | 4.35E-67    | 0.748452847 | 0.846 | 0.66  | 2.67E-62    | 1.28E+00    | endotheliocyte | CLU           |
| MT-ND31        | 2.97E-63    | 0.748345249 | 0.722 | 0.37  | 1.82E-58    | 1.95E+00    | endotheliocyte | MT-ND3        |
| NFIC1          | 4.96E-275   | 0.74818513  | 0.616 | 0.229 | 3.04E-270   | 2.69E+00    | PTM_cells      | NFIC          |
| CDH11          | 0           | 0.747732345 | 0.433 | 0.033 | 0           | 13.12121212 | PTM_cells      | CDH11         |
| RAB11FIP4      | 0           | 0.747539441 | 0.598 | 0.266 | 0           | 2.248120301 | spermatid      | RAB11FIP4     |
| ADAP2          | 1.69E-227   | 0.747532123 | 0.226 | 0.011 | 1.04E-222   | 2.05E+01    | macrophages    | ADAP2         |
| MIR7515HG      | 0           | 0.747462202 | 0.545 | 0.215 | 0           | 2.534883721 | spermatid      | MIR7515HG     |
| FTH1           | 4.45E-91    | 0.747456401 | 0.943 | 0.72  | 2.73E-86    | 1.31E+00    | endotheliocyte | FTH1          |
| RIBC2          | 0           | 0.747266111 | 0.898 | 0.298 | 0           | 3.013422819 | spermatocyte   | RIBC2         |
| WFDC3          | 0           | 0.747007566 | 0.807 | 0.272 | 0           | 2.966911765 | spermatocyte   | WFDC3         |
| CXCL12         | 7.26E-75    | 0.746822065 | 0.194 | 0.031 | 4.46E-70    | 6.26E+00    | endotheliocyte | CXCL12        |
| ALDH6A1        | 1.30E-168   | 0.746743149 | 0.299 | 0.101 | 7.97E-164   | 2.96E+00    | Sertoli_cells  | ALDH6A1       |
| S100A13        | 1.26E-190   | 0.746712291 | 0.563 | 0.107 | 7.74E-186   | 5.26E+00    | endotheliocyte | S100A13       |
| MT.ATP62       | 2.17E-13    | 0.746690872 | 0.381 | 0.346 | 1.33E-08    | 1.10E+00    | Leydig_cells   | MT.ATP6       |
| PSME12         | 0           | 0.746628185 | 0.421 | 0.084 | 0           | 5.011904762 | Leydig_cells   | PSME1         |
| RPS27A2        | 1.35E-203   | 0.746553949 | 0.934 | 0.858 | 8.30E-199   | 1.09E+00    | Leydig_cells   | RPS27A        |
| METTL23        | 0           | 0.746515017 | 0.855 | 0.332 | 0           | 2.575301205 | spermatocyte   | METTL23       |
| CASP8          | 1.69E-10    | 0.746397587 | 0.184 | 0.025 | 1.04E-05    | 7.36E+00    | T_cells        | CASP8         |
| LSM10          | 6.01E-145   | 0.74621673  | 0.258 | 0.083 | 3.69E-140   | 3.11E+00    | Sertoli_cells  | LSM10         |
| SERPINB1       | 2.33E-254   | 0.746130582 | 0.437 | 0.05  | 1.43E-249   | 8.74E+00    | endotheliocyte | SERPINB1      |
| HSD17B111      | 2.45E-10    | 0.746129767 | 0.237 | 0.041 | 1.50E-05    | 5.78E+00    | T_cells        | HSD17B11      |
| CIRBP2         | 3.18E-184   | 0.746120584 | 0.781 | 0.434 | 1.95E-179   | 1.80E+00    | Leydig_cells   | CIRBP         |
| NUPR12         | 6.91E-196   | 0.746037512 | 0.617 | 0.13  | 4.24E-191   | 4.75E+00    | VSM_cells      | NUPR1         |
| EMP33          | 0           | 0.745903941 | 0.563 | 0.144 | 0           | 3.909722222 | PTM_cells      | EMP3          |
| VIMP           | 0           | 0.745733658 | 0.688 | 0.394 | 0           | 1.746192893 | spermatogonia  | VIMP          |
| PPFIBP1        | 4.44E-225   | 0.745535537 | 0.414 | 0.051 | 2.72E-220   | 8.12E+00    | endotheliocyte | PPFIBP1       |
| RPL236         | 1.19E-06    | 0.745441678 | 0.816 | 0.703 | 0.072908752 | 1.160739687 | T_cells        | RPL23         |
| PGAM2          | 0           | 0.745210629 | 0.952 | 0.436 | 0           | 2.183486239 | spermatocyte   | PGAM2         |
| MLLT10         | 0           | 0.745020967 | 0.588 | 0.411 | 0           | 1.430656934 | spermatogonia  | MLLT10        |
| PREX1          | 1.23E-63    | 0.74495087  | 0.279 | 0.058 | 7.55E-59    | 4.81E+00    | macrophages    | PREX1         |
| ILF3           | 0           | 0.744902843 | 0.688 | 0.354 | 0           | 1.943502825 | spermatogonia  | ILF3          |
| SMIM20         | 7.62E-62    | 0.744807057 | 0.261 | 0.141 | 4.68E-57    | 1.85E+00    | Sertoli_cells  | SMIM20        |
| LRRC73         | 0           | 0.744749985 | 0.923 | 0.317 | 0           | 2.911671924 | spermatocyte   | LRRC73        |
| GINS2          | 0           | 0.744422413 | 0.405 | 0.049 | 0           | 8.265306122 | spermatogonia  | GINS2         |
| GUK1           | 7.38E-70    | 0.744318367 | 0.757 | 0.505 | 4.53E-65    | 1.50E+00    | endotheliocyte | GUK1          |
| SLC7A2         | 1.13E-165   | 0.74423491  | 0.431 | 0.084 | 6.94E-161   | 5.13E+00    | VSM_cells      | SLC7A2        |
| RP11.466H18.11 | 3.37E-61    | 0.74420891  | 0.219 | 0.037 | 2.06E-56    | 5.92E+00    | macrophages    | RP11.466H18.1 |
| RPL9P9         | 2.86E-15    | 0.744009025 | 0.384 | 0.245 | 1.76E-10    | 1.57E+00    | macrophages    | RPL9P9        |
| RPLP11         | 9.80E-55    | 0.743976673 | 0.933 | 0.765 | 6.01E-50    | 1.22E+00    | macrophages    | RPLP1         |
| SYPL1          | 0           | 0.743792368 | 0.976 | 0.593 | 0           | 1.645868465 | spermatocyte   | SYPL1         |
| AKIRIN1        | 0           | 0.743760334 | 0.686 | 0.564 | 0           | 1.216312057 | spermatid      | AKIRIN1       |
| SPANXB1        | 0           | 0.743753859 | 0.557 | 0.214 | 0           | 2.602803738 | spermatid      | SPANXB1       |
| GRK2           | 1.62E-37    | 0.743458267 | 0.209 | 0.05  | 9.91E-33    | 4.18E+00    | macrophages    | GRK2          |
| ATP1A11        | 6.66E-54    | 0.743449687 | 0.376 | 0.281 | 4.08E-49    | 1.34E+00    | Sertoli_cells  | ATP1A1        |
| MFSD1          | 5.08E-42    | 0.743396254 | 0.293 | 0.087 | 3.12E-37    | 3.37E+00    | macrophages    | MFSD1         |
| CITED2         | 5.57E-53    | 0.7428463   | 0.286 | 0.067 | 3.42E-48    | 4.27E+00    | macrophages    | CITED2        |
| SLIT1-AS1      | 0           | 0.742504859 | 0.341 | 0.105 | 0           | 3.247619048 | spermatid      | SLIT1-AS1     |
| CPED11         | 0           | 0.742395135 | 0.4   | 0.033 | 0           | 12.12121212 | VSM_cells      | CPED1         |
| C1QBP          | 0           | 0.742240011 | 0.455 | 0.242 | 0           | 1.880165289 | spermatogonia  | C1QBP         |
| CDK11B         | 0           | 0.742236897 | 0.681 | 0.302 | 0           | 2.254966887 | spermatogonia  | CDK11B        |
| SLC38A2        | 8.68E-32    | 0.742199443 | 0.32  | 0.116 | 5.33E-27    | 2.76E+00    | macrophages    | SLC38A2       |
| APP            | 2.23E-75    | 0.742158392 | 0.69  | 0.341 | 1.37E-70    | 2.02E+00    | endotheliocyte | APP           |
| LITAF2         | 5.60E-180   | 0.741715507 | 0.45  | 0.085 | 3.44E-175   | 5.29E+00    | VSM_cells      | LITAF         |
| MTCH2          | 0           | 0.741571159 | 0.973 | 0.542 | 0           | 1.795202952 | spermatocyte   | MTCH2         |
| RPL7A          | 2.82E-92    | 0.741564699 | 0.97  | 0.878 | 1.73E-87    | 1.10E+00    | endotheliocyte | RPL7A         |
| TCEAL32        | 1.22E-245   | 0.741562148 | 0.303 | 0.073 | 7.48E-241   | 4.15E+00    | Sertoli_cells  | TCEAL3        |
| SLC25A37       | 0           | 0.740991432 | 0.752 | 0.546 | 0           | 1.377289377 | spermatid      | SLC25A37      |
| YWHAH1         | 1.82E-151   | 0.740802899 | 0.442 | 0.094 | 1.12E-146   | 4.70E+00    | VSM_cells      | YWHAH         |
| PKHD1          | 0           | 0.740699391 | 0.489 | 0.28  | 0           | 1.746428571 | spermatid      | PKHD1         |
| TSPO3          | 0           | 0.740483546 | 0.518 | 0.071 | 0           | 7.295774648 | PTM_cells      | TSPO          |
| PRDM11         | 1.02E-16    | 0.740414041 | 0.184 | 0.016 | 6.25E-12    | 1.15E+01    | T_cells        | PRDM1         |
| IL18           | 1.42E-141   | 0.740383959 | 0.259 | 0.025 | 8.72E-137   | 1.04E+01    | macrophages    | IL18          |
| KHDRBS1        | 0           | 0.740381153 | 0.656 | 0.32  | 0           | 2.05        | spermatogonia  | KHDRBS1       |
| CHCHD10        | 1.04E-130   | 0.740308108 | 0.467 | 0.121 | 6.36E-126   | 3.86E+00    | VSM_cells      | CHCHD10       |
| PDZD8          | 0           | 0.740195538 | 0.636 | 0.337 | 0           | 1.887240356 | spermatid      | PDZD8         |
| ATP6V0B        | 0           | 0.740051159 | 0.556 | 0.121 | 0           | 4.595041322 | spermatogonia  | ATP6V0B       |
| RPL10P33       | 0.004042033 | 0.739574585 | 0.158 | 0.056 | 1           | 2.821428571 | T_cells        | RPL10P3       |
| C6orf99        | 0           | 0.739490955 | 0.974 | 0.484 | 0           | 2.012396694 | spermatocyte   | C6orf99       |
| HLA.E2         | 5.44E-132   | 0.738989823 | 0.231 | 0.056 | 3.34E-127   | 4.13E+00    | Leydig_cells   | HLA.E         |
| HLA-DMB        | 0           | 0.738863968 | 0.229 | 0.004 | 0           | 57.25       | macrophages    | HLA-DMB       |
| COMT2          | 6.24E-179   | 0.738773252 | 0.299 | 0.092 | 3.83E-174   | 3.25E+00    | Sertoli_cells  | COMT          |

|               |           |             |       |       |             |             |                |               |
|---------------|-----------|-------------|-------|-------|-------------|-------------|----------------|---------------|
| CLEC2B        | 3.19E-222 | 0.738760801 | 0.266 | 0.016 | 1.95E-217   | 1.66E+01    | macrophages    | CLEC2B        |
| ECH1          | 2.98E-28  | 0.738732472 | 0.407 | 0.39  | 1.83E-23    | 1.04E+00    | Sertoli_cells  | ECH1          |
| CYP1B1        | 3.62E-85  | 0.738447119 | 0.341 | 0.156 | 2.22E-80    | 2.19E+00    | Leydig_cells   | CYP1B1        |
| MT-ND22       | 7.58E-84  | 0.738413712 | 0.606 | 0.405 | 4.65E-79    | 1.50E+00    | Leydig_cells   | MT-ND2        |
| DDX5          | 4.59E-88  | 0.738326186 | 0.916 | 0.762 | 2.82E-83    | 1.20E+00    | endotheliocyte | DDX5          |
| ZCRB1         | 0         | 0.738148088 | 0.966 | 0.588 | 0           | 1.642857143 | spermatocyte   | ZCRB1         |
| EMB1          | 1.07E-16  | 0.73814614  | 0.211 | 0.021 | 6.54E-12    | 1.00E+01    | T_cells        | EMB           |
| MTRNR2L1      | 2.57E-179 | 0.737876427 | 0.248 | 0.066 | 1.57E-174   | 3.76E+00    | Sertoli_cells  | MTRNR2L1      |
| VEGFB         | 0         | 0.737696837 | 0.444 | 0.037 | 0           | 12          | PTM_cells      | VEGFB         |
| SLC1A5        | 0         | 0.737593149 | 0.746 | 0.155 | 0           | 4.812903226 | spermatocyte   | SLC1A5        |
| RPS244        | 1.93E-100 | 0.737506871 | 0.945 | 0.885 | 1.18E-95    | 1.07E+00    | VSM_cells      | RPS24         |
| VIM5          | 2.65E-09  | 0.737497396 | 0.789 | 0.452 | 0.000162344 | 1.745575221 | T_cells        | VIM           |
| RPL34P182     | 2.14E-21  | 0.737418271 | 0.279 | 0.204 | 1.31E-16    | 1.37E+00    | Leydig_cells   | RPL34P18      |
| LSM2          | 0         | 0.737256185 | 0.47  | 0.114 | 0           | 4.122807018 | spermatogonia  | LSM2          |
| TPP1          | 1.41E-55  | 0.737111745 | 0.246 | 0.05  | 8.63E-51    | 4.92E+00    | macrophages    | TPP1          |
| HLA.A2        | 4.18E-45  | 0.737000637 | 0.261 | 0.134 | 2.57E-40    | 1.95E+00    | Leydig_cells   | HLA.A         |
| JAM2          | 6.57E-150 | 0.736997653 | 0.471 | 0.097 | 4.03E-145   | 4.86E+00    | endotheliocyte | JAM2          |
| TPD52L1       | 6.58E-294 | 0.736995349 | 0.4   | 0.037 | 4.04E-289   | 1.08E+01    | endotheliocyte | TPD52L1       |
| XRCC6BP1      | 0         | 0.736982484 | 0.555 | 0.188 | 0           | 2.95212766  | spermatocyte   | XRCC6BP1      |
| CNN31         | 2.54E-116 | 0.736822291 | 0.582 | 0.355 | 1.56E-111   | 1.64E+00    | Leydig_cells   | CNN3          |
| PQLC1         | 0         | 0.736615687 | 0.629 | 0.35  | 0           | 1.797142857 | spermatid      | PQLC1         |
| CEP55         | 0         | 0.736571505 | 0.776 | 0.149 | 0           | 5.208053691 | spermatocyte   | CEP55         |
| CST8          | 0         | 0.736288287 | 0.478 | 0.082 | 0           | 5.829268293 | spermatid      | CST8          |
| LZTFL1        | 0         | 0.736264816 | 0.895 | 0.25  | 0           | 3.58        | spermatocyte   | LZTFL1        |
| CTSL          | 0         | 0.736235824 | 0.546 | 0.202 | 0           | 2.702970297 | spermatogonia  | CTSL          |
| DNAJC18       | 0         | 0.735665447 | 0.687 | 0.399 | 0           | 1.721804511 | spermatid      | DNAJC18       |
| BIRC3         | 4.43E-70  | 0.735531762 | 0.199 | 0.027 | 2.72E-65    | 7.37E+00    | macrophages    | BIRC3         |
| MGST3         | 3.25E-233 | 0.735523933 | 0.611 | 0.222 | 1.99E-228   | 2.75E+00    | Leydig_cells   | MGST3         |
| SRSF51        | 5.28E-24  | 0.735487905 | 0.694 | 0.601 | 3.24E-19    | 1.15E+00    | macrophages    | SRSF5         |
| NFKBIZ3       | 1.27E-125 | 0.73521261  | 0.438 | 0.103 | 7.79E-121   | 4.25E+00    | VSM_cells      | NFKBIZ        |
| CYBRD11       | 0         | 0.735069648 | 0.48  | 0.04  | 0           | 12          | PTM_cells      | CYBRD1        |
| CORO2A        | 0         | 0.734842399 | 0.264 | 0.017 | 0           | 15.52941176 | Sertoli_cells  | CORO2A        |
| RP11-231D20.2 | 0         | 0.734757386 | 0.56  | 0.2   | 0           | 2.8         | spermatocyte   | RP11-231D20.2 |
| APP2          | 2.82E-227 | 0.734696881 | 0.681 | 0.329 | 1.73E-222   | 2.07E+00    | PTM_cells      | APP           |
| PCMTD1        | 3.62E-121 | 0.734592106 | 0.499 | 0.128 | 2.22E-116   | 3.90E+00    | endotheliocyte | PCMTD1        |
| ZNF846        | 0         | 0.734453848 | 0.806 | 0.246 | 0           | 3.276422764 | spermatocyte   | ZNF846        |
| PABPC4        | 5.11E-296 | 0.734290847 | 0.527 | 0.323 | 3.14E-291   | 1.63E+00    | spermatogonia  | PABPC4        |
| MT-ATP61      | 3.18E-55  | 0.733715328 | 0.734 | 0.43  | 1.95E-50    | 1.71E+00    | endotheliocyte | MT-ATP6       |
| ZNF428        | 7.36E-71  | 0.733615029 | 0.458 | 0.386 | 4.52E-66    | 1.19E+00    | spermatogonia  | ZNF428        |
| PSD3          | 0         | 0.73353455  | 0.643 | 0.348 | 0           | 1.847701149 | spermatid      | PSD3          |
| LINC00943     | 0         | 0.733182891 | 0.657 | 0.336 | 0           | 1.955357143 | spermatid      | LINC00943     |
| RPL9P91       | 1.24E-15  | 0.73304205  | 0.297 | 0.245 | 7.60E-11    | 1.21E+00    | Leydig_cells   | RPL9P9        |
| ARHGAP21      | 9.17E-194 | 0.732884087 | 0.456 | 0.153 | 5.62E-189   | 2.98E+00    | Leydig_cells   | ARHGAP21      |
| THBD3         | 0         | 0.732689905 | 0.387 | 0.033 | 0           | 11.72727273 | PTM_cells      | THBD          |
| PLS3          | 2.95E-170 | 0.732644822 | 0.449 | 0.075 | 1.81E-165   | 5.99E+00    | endotheliocyte | PLS3          |
| PRDX12        | 6.12E-125 | 0.732631941 | 0.529 | 0.307 | 3.75E-120   | 1.72E+00    | Sertoli_cells  | PRDX1         |
| MT.ND52       | 1.07E-17  | 0.73241227  | 0.375 | 0.315 | 6.58E-13    | 1.19E+00    | Leydig_cells   | MT.ND5        |
| RPLP0         | 9.26E-269 | 0.73234804  | 0.811 | 0.722 | 5.68E-264   | 1.12E+00    | spermatogonia  | RPLP0         |
| LRTOMT        | 0         | 0.732238886 | 0.695 | 0.507 | 0           | 1.370808679 | spermatid      | LRTOMT        |
| SSMEM1        | 0         | 0.732211867 | 0.852 | 0.28  | 0           | 3.042857143 | spermatocyte   | SSMEM1        |
| HSPA1A3       | 9.44E-155 | 0.73185259  | 0.626 | 0.35  | 5.79E-150   | 1.79E+00    | PTM_cells      | HSPA1A        |
| KCNAB1        | 4.06E-272 | 0.731765766 | 0.391 | 0.044 | 2.49E-267   | 8.89E+00    | VSM_cells      | KCNAB1        |
| ADAM15        | 0         | 0.731713634 | 0.429 | 0.025 | 0           | 17.16       | endotheliocyte | ADAM15        |
| DUSP22        | 0         | 0.731666917 | 0.504 | 0.209 | 0           | 2.411483254 | spermatogonia  | DUSP22        |
| ANKRD31       | 0         | 0.731505662 | 0.436 | 0.069 | 0           | 6.31884058  | spermatogonia  | ANKRD31       |
| KRT10         | 0         | 0.731170776 | 0.742 | 0.361 | 0           | 2.055401662 | spermatocyte   | KRT10         |
| OLAH          | 0         | 0.731151041 | 0.494 | 0.238 | 0           | 2.075630252 | spermatid      | OLAH          |
| PPIA4         | 7.81E-196 | 0.731009137 | 0.826 | 0.617 | 4.79E-191   | 1.34E+00    | PTM_cells      | PPIA          |
| CCDC73        | 0         | 0.730978551 | 0.37  | 0.032 | 0           | 11.5625     | spermatogonia  | CCDC73        |
| SLC39A3       | 0         | 0.730825678 | 0.917 | 0.412 | 0           | 2.225728155 | spermatocyte   | SLC39A3       |
| TRIM56        | 2.62E-274 | 0.730778452 | 0.437 | 0.046 | 1.60E-269   | 9.50E+00    | endotheliocyte | TRIM56        |
| SNAI1         | 1.09E-275 | 0.730595486 | 0.409 | 0.041 | 6.69E-271   | 9.98E+00    | endotheliocyte | SNAI1         |
| EFCAB6        | 0         | 0.730518193 | 0.651 | 0.381 | 0           | 1.708661417 | spermatid      | EFCAB6        |
| MT.CO11       | 8.03E-28  | 0.730291888 | 0.572 | 0.337 | 4.92E-23    | 1.70E+00    | macrophages    | MT.CO1        |
| CDHR2         | 0         | 0.730273031 | 0.45  | 0.088 | 0           | 5.113636364 | spermatid      | CDHR2         |
| ARL6IP1       | 5.65E-279 | 0.730114789 | 0.584 | 0.434 | 3.47E-274   | 1.35E+00    | spermatogonia  | ARL6IP1       |
| LINC-PINT     | 3.39E-10  | 0.730112915 | 0.184 | 0.026 | 2.08E-05    | 7.08E+00    | T_cells        | LINC-PINT     |
| C8orf88       | 0         | 0.73007735  | 0.928 | 0.409 | 0           | 2.268948655 | spermatocyte   | C8orf88       |
| RPS81         | 5.81E-55  | 0.729630239 | 0.919 | 0.775 | 3.57E-50    | 1.19E+00    | macrophages    | RPS8          |
| NPM1          | 0         | 0.729527072 | 0.874 | 0.648 | 0           | 1.348765432 | spermatogonia  | NPM1          |
| CD46          | 0         | 0.729456977 | 0.464 | 0.288 | 0           | 1.611111111 | spermatid      | CD46          |
| PDE2A         | 0         | 0.729394497 | 0.345 | 0.014 | 0           | 24.64285714 | endotheliocyte | PDE2A         |
| EIF4A23       | 3.75E-199 | 0.729072935 | 0.765 | 0.451 | 2.30E-194   | 1.70E+00    | PTM_cells      | EIF4A2        |
| MT-CYB        | 2.88E-160 | 0.72897341  | 0.504 | 0.369 | 1.76E-155   | 1.37E+00    | spermatogonia  | MT-CYB        |
| FAM98A        | 1.64E-51  | 0.728929327 | 0.39  | 0.297 | 1.00E-46    | 1.31E+00    | Sertoli_cells  | FAM98A        |

|              |             |             |       |       |             |             |                |              |
|--------------|-------------|-------------|-------|-------|-------------|-------------|----------------|--------------|
| PMP221       | 0           | 0.728534886 | 0.546 | 0.141 | 0           | 3.872340426 | PTM_cells      | PMP22        |
| DCUN1D5      | 0           | 0.728472779 | 0.506 | 0.086 | 0           | 5.88372093  | spermatogonia  | DCUN1D5      |
| GOLGA6L2     | 0           | 0.728317951 | 0.653 | 0.216 | 0           | 3.023148148 | spermatocyte   | GOLGA6L2     |
| NFKBIA5      | 8.89E-92    | 0.728247375 | 0.379 | 0.203 | 5.46E-87    | 1.87E+00    | Sertoli_cells  | NFKBIA       |
| GIGYF2       | 0           | 0.728237735 | 0.663 | 0.402 | 0           | 1.649253731 | spermatid      | GIGYF2       |
| CIRBP        | 0           | 0.728034428 | 0.732 | 0.37  | 0           | 1.978378378 | spermatogonia  | CIRBP        |
| PSMG2        | 0           | 0.728008107 | 0.955 | 0.512 | 0           | 1.865234375 | spermatocyte   | PSMG2        |
| DDX52        | 2.48E-09    | 0.727958937 | 0.921 | 0.764 | 0.000152315 | 1.205497382 | T_cells        | DDX5         |
| BST24        | 8.35E-212   | 0.727941926 | 0.575 | 0.106 | 5.12E-207   | 5.42E+00    | VSM_cells      | BST2         |
| RP11-402G3.5 | 0           | 0.727859982 | 0.366 | 0.175 | 0           | 2.091428571 | spermatid      | RP11-402G3.5 |
| OSR1         | 0           | 0.727753408 | 0.285 | 0.017 | 0           | 16.76470588 | Leydig_cells   | OSR1         |
| RILPL2       | 0.000552478 | 0.727740164 | 0.211 | 0.075 | 1           | 2.813333333 | T_cells        | RILPL2       |
| MAD2L1       | 0           | 0.727535894 | 0.459 | 0.044 | 0           | 10.43181818 | spermatogonia  | MAD2L1       |
| MYL6         | 3.43E-98    | 0.727490198 | 0.913 | 0.661 | 2.10E-93    | 1.38E+00    | endotheliocyte | MYL6         |
| TSG101       | 0           | 0.727342471 | 0.662 | 0.339 | 0           | 1.95280236  | spermatogonia  | TSG101       |
| C12orf75     | 2.46E-23    | 0.72728071  | 0.46  | 0.472 | 1.51E-18    | 9.75E-01    | Sertoli_cells  | C12orf75     |
| ADGRE5       | 3.52E-91    | 0.727226114 | 0.195 | 0.021 | 2.16E-86    | 9.29E+00    | macrophages    | ADGRE5       |
| TCFL5        | 0           | 0.726839801 | 0.772 | 0.229 | 0           | 3.371179039 | spermatocyte   | TCFL5        |
| RUNX1        | 8.32E-20    | 0.726829806 | 0.266 | 0.118 | 5.10E-15    | 2.25E+00    | macrophages    | RUNX1        |
| SUN21        | 3.95E-08    | 0.72674363  | 0.316 | 0.084 | 0.002422895 | 3.761904762 | T_cells        | SUN2         |
| GOLGA4       | 0           | 0.726559161 | 0.755 | 0.571 | 0           | 1.322241681 | spermatogonia  | GOLGA4       |
| PRNP         | 1.65E-116   | 0.726385214 | 0.465 | 0.228 | 1.02E-111   | 2.04E+00    | Leydig_cells   | PRNP         |
| EVL          | 0.001832898 | 0.726283687 | 0.263 | 0.123 | 1           | 2.138211382 | T_cells        | EVL          |
| ARL6IP5      | 1.28E-104   | 0.725999536 | 0.596 | 0.199 | 7.86E-100   | 2.99E+00    | endotheliocyte | ARL6IP5      |
| CCNI2        | 2.29E-219   | 0.725948998 | 0.794 | 0.535 | 1.40E-214   | 1.48E+00    | PTM_cells      | CCNI         |
| REEP5        | 0           | 0.725855603 | 0.931 | 0.411 | 0           | 2.265206813 | spermatocyte   | REEP5        |
| DAW1         | 0           | 0.72576335  | 0.812 | 0.244 | 0           | 3.327868852 | spermatocyte   | DAW1         |
| CCDC34       | 0           | 0.725751926 | 0.973 | 0.49  | 0           | 1.985714286 | spermatocyte   | CCDC34       |
| DPYSL2       | 3.34E-193   | 0.725526334 | 0.509 | 0.086 | 2.05E-188   | 5.92E+00    | endotheliocyte | DPYSL2       |
| TMED2        | 0           | 0.725522385 | 0.532 | 0.16  | 0           | 3.325       | spermatogonia  | TMED2        |
| IER53        | 1.12E-104   | 0.725471965 | 0.452 | 0.13  | 6.90E-100   | 3.48E+00    | VSM_cells      | IER5         |
| LTBP31       | 0           | 0.725363154 | 0.477 | 0.069 | 0           | 6.913043478 | PTM_cells      | LTBP3        |
| SLC25A51     | 7.97E-124   | 0.72528983  | 0.345 | 0.146 | 4.89E-119   | 2.36E+00    | Sertoli_cells  | SLC25A5      |
| RASSF8       | 0           | 0.725001421 | 0.721 | 0.493 | 0           | 1.462474645 | spermatid      | RASSF8       |
| MCHR2.AS1    | 0           | 0.724955202 | 0.378 | 0.092 | 0           | 4.108695652 | spermatocyte   | MCHR2.AS1    |
| PRELID1      | 0           | 0.724871983 | 0.456 | 0.094 | 0           | 4.85106383  | spermatogonia  | PRELID1      |
| COL6A31      | 0           | 0.724836055 | 0.474 | 0.061 | 0           | 7.770491803 | PTM_cells      | COL6A3       |
| LMO41        | 0           | 0.724816757 | 0.541 | 0.119 | 0           | 4.546218487 | PTM_cells      | LMO4         |
| ID2          | 3.51E-122   | 0.724624798 | 0.499 | 0.12  | 2.15E-117   | 4.16E+00    | endotheliocyte | ID2          |
| SBDS         | 0           | 0.724577    | 0.662 | 0.535 | 0           | 1.237383178 | spermatid      | SBDS         |
| CDRT15       | 0           | 0.724389832 | 0.705 | 0.229 | 0           | 3.07860262  | spermatocyte   | CDRT15       |
| THBD2        | 0           | 0.724252912 | 0.3   | 0.039 | 0           | 7.692307692 | Leydig_cells   | THBD         |
| AURKC        | 0           | 0.724148696 | 0.89  | 0.254 | 0           | 3.503937008 | spermatocyte   | AURKC        |
| CAPNS1       | 0           | 0.72412875  | 0.924 | 0.397 | 0           | 2.327455919 | spermatocyte   | CAPNS1       |
| RPL371       | 2.56E-40    | 0.723816102 | 0.869 | 0.805 | 1.57E-35    | 1.08E+00    | macrophages    | RPL37        |
| DMRTB1       | 0           | 0.723771587 | 0.584 | 0.357 | 0           | 1.635854342 | spermatogonia  | DMRTB1       |
| ELL2         | 1.04E-21    | 0.723749767 | 0.253 | 0.1   | 6.40E-17    | 2.53E+00    | macrophages    | ELL2         |
| GLB1L        | 0           | 0.723620012 | 0.773 | 0.192 | 0           | 4.026041667 | spermatocyte   | GLB1L        |
| FTH15        | 1.23E-273   | 0.723492572 | 0.896 | 0.711 | 7.53E-269   | 1.26E+00    | Sertoli_cells  | FTH1         |
| PDCD4        | 8.68E-57    | 0.723467691 | 0.571 | 0.284 | 5.32E-52    | 2.01E+00    | endotheliocyte | PDCD4        |
| TAF12        | 0           | 0.72346467  | 0.51  | 0.243 | 0           | 2.098765432 | spermatogonia  | TAF12        |
| MCL1         | 7.79E-59    | 0.723427969 | 0.764 | 0.526 | 4.78E-54    | 1.45E+00    | endotheliocyte | MCL1         |
| LAMB1        | 5.35E-167   | 0.723387967 | 0.308 | 0.079 | 3.28E-162   | 3.90E+00    | Leydig_cells   | LAMB1        |
| GSTP11       | 1.65E-48    | 0.723216871 | 0.481 | 0.171 | 1.01E-43    | 2.81E+00    | macrophages    | GSTP1        |
| RBBP8        | 0           | 0.723023152 | 0.556 | 0.178 | 0           | 3.123595506 | spermatogonia  | RBBP8        |
| CCDC80       | 0           | 0.722892784 | 0.576 | 0.256 | 0           | 2.25        | spermatid      | CCDC80       |
| ILK1         | 1.14E-65    | 0.722877301 | 0.55  | 0.288 | 7.02E-61    | 1.91E+00    | VSM_cells      | ILK          |
| VDAC2        | 0           | 0.722734719 | 0.905 | 0.432 | 0           | 2.094907407 | spermatocyte   | VDAC2        |
| RAI14        | 0           | 0.722681199 | 0.614 | 0.334 | 0           | 1.838323353 | spermatid      | RAI14        |
| CSNK2B       | 0           | 0.722611742 | 0.972 | 0.561 | 0           | 1.732620321 | spermatocyte   | CSNK2B       |
| TLR7         | 0           | 0.722536559 | 0.215 | 0.001 | 0           | 215         | macrophages    | TLR7         |
| AC022007.5   | 0           | 0.72252246  | 0.853 | 0.238 | 0           | 3.584033613 | spermatocyte   | AC022007.5   |
| ARHGAP9      | 0           | 0.722474798 | 0.832 | 0.191 | 0           | 4.356020942 | spermatocyte   | ARHGAP9      |
| RPS27L       | 1.22E-137   | 0.722399738 | 0.578 | 0.338 | 7.50E-133   | 1.71E+00    | PTM_cells      | RPS27L       |
| SERP2        | 0           | 0.722288623 | 0.559 | 0.265 | 0           | 2.109433962 | spermatid      | SERP2        |
| RTN4         | 0           | 0.722288466 | 0.964 | 0.592 | 0           | 1.628378378 | spermatocyte   | RTN4         |
| IER3IP1      | 0           | 0.722271967 | 0.482 | 0.149 | 0           | 3.234899329 | spermatogonia  | IER3IP1      |
| GNB5         | 0           | 0.722113142 | 0.457 | 0.056 | 0           | 8.160714286 | PTM_cells      | GNB5         |
| RASSF21      | 0           | 0.721524571 | 0.453 | 0.087 | 0           | 5.206896552 | PTM_cells      | RASSF2       |
| GSN4         | 6.26E-163   | 0.721439725 | 0.698 | 0.207 | 3.84E-158   | 3.37E+00    | VSM_cells      | GSN          |
| ATP6V1A      | 0           | 0.721393661 | 0.595 | 0.344 | 0           | 1.729651163 | spermatid      | ATP6V1A      |
| MARCKSL1     | 5.98E-229   | 0.721194831 | 0.598 | 0.209 | 3.67E-224   | 2.86E+00    | Leydig_cells   | MARCKSL1     |
| C11orf70     | 0           | 0.720487855 | 0.875 | 0.314 | 0           | 2.786624204 | spermatocyte   | C11orf70     |
| FABP4        | 3.05E-14    | 0.720371829 | 0.025 | 0.003 | 1.87E-09    | 8.33E+00    | endotheliocyte | FABP4        |
| FLI1         | 0           | 0.720236249 | 0.395 | 0.003 | 0           | 131.6666667 | endotheliocyte | FLI1         |

|               |           |             |       |       |             |             |                |               |
|---------------|-----------|-------------|-------|-------|-------------|-------------|----------------|---------------|
| SYCN          | 0         | 0.720215333 | 0.188 | 0.009 | 0           | 20.88888889 | Sertoli_cells  | SYCN          |
| TEX12         | 0         | 0.719768318 | 0.395 | 0.033 | 0           | 11.96969697 | spermatogonia  | TEX12         |
| RNF144B       | 6.46E-66  | 0.719745148 | 0.209 | 0.032 | 3.96E-61    | 6.53E+00    | macrophages    | RNF144B       |
| NDUFB113      | 6.69E-08  | 0.7194345   | 0.395 | 0.127 | 0.00410186  | 3.11023622  | T_cells        | NDUFB11       |
| DEK1          | 4.59E-114 | 0.719294496 | 0.609 | 0.21  | 2.82E-109   | 2.90E+00    | VSM_cells      | DEK           |
| CTNNB1        | 1.61E-98  | 0.719251129 | 0.543 | 0.177 | 9.87E-94    | 3.07E+00    | endotheliocyte | CTNNB1        |
| COL18A1       | 0         | 0.719222535 | 0.39  | 0.071 | 0           | 5.492957746 | Leydig_cells   | COL18A1       |
| SMARCA2       | 0         | 0.719186973 | 0.743 | 0.294 | 0           | 2.527210884 | spermatocyte   | SMARCA2       |
| C1orf105      | 0         | 0.719125631 | 0.846 | 0.265 | 0           | 3.19245283  | spermatocyte   | C1orf105      |
| RPL17         | 2.03E-44  | 0.719099267 | 0.596 | 0.372 | 1.24E-39    | 1.60E+00    | endotheliocyte | RPL17         |
| NDUFAF7       | 0         | 0.718722922 | 0.877 | 0.299 | 0           | 2.933110368 | spermatocyte   | NDUFAF7       |
| SUMO2         | 0         | 0.718555041 | 0.843 | 0.669 | 0           | 1.260089686 | spermatogonia  | SUMO2         |
| RPL142        | 1.21E-139 | 0.71852033  | 0.785 | 0.64  | 7.42E-135   | 1.23E+00    | Leydig_cells   | RPL14         |
| HCFC2         | 0         | 0.71845295  | 0.924 | 0.344 | 0           | 2.686046512 | spermatocyte   | HCFC2         |
| RP5.88207.1   | 2.87E-18  | 0.718322182 | 0.232 | 0.097 | 1.76E-13    | 2.39E+00    | macrophages    | RP5.88207.1   |
| TES           | 0         | 0.718280574 | 0.598 | 0.328 | 0           | 1.823170732 | spermatid      | TES           |
| GTSF1         | 0         | 0.718068558 | 0.99  | 0.644 | 0           | 1.537267081 | spermatocyte   | GTSF1         |
| RNF139        | 0         | 0.717966262 | 0.706 | 0.505 | 0           | 1.398019802 | spermatid      | RNF139        |
| CCDC107       | 9.95E-110 | 0.717960863 | 0.514 | 0.169 | 6.10E-105   | 3.04E+00    | VSM_cells      | CCDC107       |
| LHFP1         | 2.15E-78  | 0.717916087 | 0.518 | 0.212 | 1.32E-73    | 2.44E+00    | VSM_cells      | LHFP          |
| NUB1          | 0         | 0.717885501 | 0.946 | 0.364 | 0           | 2.598901099 | spermatocyte   | NUB1          |
| DCAF4L2       | 0         | 0.717765805 | 0.51  | 0.117 | 0           | 4.358974359 | spermatogonia  | DCAF4L2       |
| GAS6          | 3.49E-150 | 0.717709825 | 0.457 | 0.086 | 2.14E-145   | 5.31E+00    | endotheliocyte | GAS6          |
| PRPS1L1       | 0         | 0.717664765 | 0.802 | 0.156 | 0           | 5.141025641 | spermatocyte   | PRPS1L1       |
| ADAM32        | 0         | 0.717604542 | 0.907 | 0.271 | 0           | 3.346863469 | spermatocyte   | ADAM32        |
| RP11.425L10.1 | 2.30E-12  | 0.717486539 | 0.367 | 0.245 | 1.41E-07    | 1.50E+00    | macrophages    | RP11.425L10.1 |
| IFITM11       | 0         | 0.717159214 | 0.3   | 0.016 | 0           | 18.75       | Leydig_cells   | IFITM1        |
| ALKBH7        | 0         | 0.717145366 | 0.997 | 0.833 | 0           | 1.196878752 | spermatocyte   | ALKBH7        |
| IGF2          | 2.18E-286 | 0.717116421 | 0.546 | 0.065 | 1.34E-281   | 8.40E+00    | endotheliocyte | IGF2          |
| SH3BGRL6      | 2.80E-145 | 0.717081236 | 0.296 | 0.1   | 1.72E-140   | 2.96E+00    | Sertoli_cells  | SH3BGRL       |
| RPS3A3        | 2.26E-96  | 0.717027435 | 0.937 | 0.898 | 1.39E-91    | 1.04E+00    | VSM_cells      | RPS3A         |
| RPL3P4        | 9.54E-13  | 0.717014685 | 0.338 | 0.305 | 5.85E-08    | 1.11E+00    | Leydig_cells   | RPL3P4        |
| RFX2          | 0         | 0.716999113 | 0.928 | 0.358 | 0           | 2.592178771 | spermatocyte   | RFX2          |
| MLF1          | 0         | 0.716805425 | 0.97  | 0.866 | 0           | 1.120092379 | spermatid      | MLF1          |
| MDH1B         | 0         | 0.716676142 | 0.871 | 0.248 | 0           | 3.512096774 | spermatocyte   | MDH1B         |
| C1orf111      | 0         | 0.716460962 | 0.624 | 0.317 | 0           | 1.968454259 | spermatid      | C1orf111      |
| CENPF         | 0         | 0.716376444 | 0.813 | 0.207 | 0           | 3.927536232 | spermatocyte   | CENPF         |
| CD247         | 1.14E-115 | 0.716373789 | 0.184 | 0.002 | 6.98E-111   | 9.20E+01    | T_cells        | CD247         |
| HSPA83        | 2.48E-05  | 0.716315349 | 0.711 | 0.567 | 1           | 1.253968254 | T_cells        | HSPA8         |
| OAZ1          | 1.10E-26  | 0.716291185 | 0.707 | 0.616 | 6.77E-22    | 1.15E+00    | macrophages    | OAZ1          |
| ARID5B        | 8.94E-179 | 0.716104484 | 0.394 | 0.122 | 5.49E-174   | 3.23E+00    | Leydig_cells   | ARID5B        |
| FAM210B       | 0         | 0.715935212 | 0.463 | 0.043 | 0           | 10.76744186 | PTM_cells      | FAM210B       |
| TBC1D10C      | 5.40E-185 | 0.715926235 | 0.237 | 0.002 | 3.31E-180   | 1.19E+02    | T_cells        | TBC1D10C      |
| MS4A5         | 0         | 0.71578233  | 0.656 | 0.328 | 0           | 2           | spermatid      | MS4A5         |
| C18orf63      | 0         | 0.715763789 | 0.323 | 0.045 | 0           | 7.177777778 | spermatogonia  | C18orf63      |
| RPS115        | 4.86E-09  | 0.715760091 | 0.895 | 0.822 | 0.000298258 | 1.088807786 | T_cells        | RPS11         |
| CALM12        | 6.46E-91  | 0.715449207 | 0.886 | 0.69  | 3.96E-86    | 1.28E+00    | VSM_cells      | CALM1         |
| CIAPIN1       | 0         | 0.714970656 | 0.652 | 0.254 | 0           | 2.566929134 | spermatocyte   | CIAPIN1       |
| RPS4X1        | 2.05E-56  | 0.714900254 | 0.754 | 0.345 | 1.26E-51    | 2.19E+00    | macrophages    | RPS4X         |
| MIS18BP1      | 0         | 0.714883101 | 0.522 | 0.132 | 0           | 3.954545455 | spermatogonia  | MIS18BP1      |
| BRAP          | 0         | 0.714803094 | 0.944 | 0.426 | 0           | 2.215962441 | spermatocyte   | BRAP          |
| CST13P        | 0         | 0.714685063 | 0.272 | 0.036 | 0           | 7.555555556 | spermatid      | CST13P        |
| TYMP          | 3.92E-121 | 0.71461002  | 0.226 | 0.021 | 2.40E-116   | 1.08E+01    | macrophages    | TYMP          |
| GPR146        | 0         | 0.714136303 | 0.35  | 0.004 | 0           | 87.5        | endotheliocyte | GPR146        |
| PLD3          | 2.66E-163 | 0.714026952 | 0.462 | 0.171 | 1.63E-158   | 2.70E+00    | Leydig_cells   | PLD3          |
| FUNDC2        | 0         | 0.713718812 | 0.568 | 0.265 | 0           | 2.143396226 | spermatid      | FUNDC2        |
| SLC40A1       | 1.14E-234 | 0.713327553 | 0.375 | 0.091 | 6.98E-230   | 4.12E+00    | Leydig_cells   | SLC40A1       |
| UBE2R2        | 0         | 0.713017699 | 0.69  | 0.578 | 0           | 1.193771626 | spermatid      | UBE2R2        |
| TCP11         | 0         | 0.712973078 | 0.884 | 0.702 | 0           | 1.259259259 | spermatid      | TCP11         |
| PRC1          | 0         | 0.712892986 | 0.57  | 0.207 | 0           | 2.753623188 | spermatogonia  | PRC1          |
| SYNM          | 3.12E-77  | 0.712770695 | 0.414 | 0.146 | 1.91E-72    | 2.84E+00    | VSM_cells      | SYNM          |
| CDK7          | 0         | 0.712726791 | 0.737 | 0.137 | 0           | 5.379562044 | spermatocyte   | CDK7          |
| NDFIP1        | 3.49E-41  | 0.712664874 | 0.346 | 0.267 | 2.14E-36    | 1.30E+00    | Sertoli_cells  | NDFIP1        |
| PHLDA11       | 3.17E-252 | 0.712568026 | 0.32  | 0.06  | 1.94E-247   | 5.33E+00    | Leydig_cells   | PHLDA1        |
| RPS242        | 3.38E-195 | 0.712357139 | 0.952 | 0.883 | 2.07E-190   | 1.08E+00    | Leydig_cells   | RPS24         |
| PLP1          | 0         | 0.712177033 | 0.26  | 0.014 | 0           | 18.57142857 | Sertoli_cells  | PLP1          |
| TUBA1B        | 1.81E-64  | 0.711699398 | 0.734 | 0.724 | 1.11E-59    | 1.01E+00    | spermatogonia  | TUBA1B        |
| RHOBTB31      | 0         | 0.711604142 | 0.511 | 0.121 | 0           | 4.223140496 | PTM_cells      | RHOBTB3       |
| WDR60         | 0         | 0.711556457 | 0.968 | 0.468 | 0           | 2.068376068 | spermatocyte   | WDR60         |
| ACTG2         | 1.34E-263 | 0.71114745  | 0.313 | 0.028 | 8.20E-259   | 1.12E+01    | VSM_cells      | ACTG2         |
| ALDH1A2       | 0         | 0.711038311 | 0.91  | 0.31  | 0           | 2.935483871 | spermatocyte   | ALDH1A2       |
| KHDRBS3       | 0         | 0.710581912 | 0.975 | 0.509 | 0           | 1.915520629 | spermatocyte   | KHDRBS3       |
| SPPL2C        | 0         | 0.71052988  | 0.464 | 0.069 | 0           | 6.724637681 | spermatid      | SPPL2C        |
| ACSL4         | 0         | 0.71052847  | 0.27  | 0.038 | 0           | 7.105263158 | Sertoli_cells  | ACSL4         |
| PPM1J         | 0         | 0.710466596 | 0.602 | 0.254 | 0           | 2.37007874  | spermatid      | PPM1J         |



|            |           |             |       |       |           |             |                |            |
|------------|-----------|-------------|-------|-------|-----------|-------------|----------------|------------|
| MTND2P281  | 6.31E-21  | 0.710352443 | 0.283 | 0.121 | 3.87E-16  | 2.34E+00    | macrophages    | MTND2P28   |
| PPIA3      | 1.16E-170 | 0.710220615 | 0.848 | 0.617 | 7.10E-166 | 1.37E+00    | Leydig_cells   | PPIA       |
| AGBL5      | 0         | 0.710203915 | 0.981 | 0.502 | 0         | 1.954183267 | spermatocyte   | AGBL5      |
| XPO1       | 0         | 0.709977941 | 0.555 | 0.142 | 0         | 3.908450704 | spermatogonia  | XPO1       |
| HLA-C3     | 0         | 0.709763455 | 0.542 | 0.159 | 0         | 3.408805031 | PTM_cells      | HLA-C      |
| ADAD1      | 0         | 0.709729603 | 0.978 | 0.54  | 0         | 1.811111111 | spermatocyte   | ADAD1      |
| AC009487.4 | 0         | 0.709701928 | 0.464 | 0.102 | 0         | 4.549019608 | spermatid      | AC009487.4 |
| TAF15      | 0         | 0.709587187 | 0.569 | 0.182 | 0         | 3.126373626 | spermatogonia  | TAF15      |
| SH3KBP11   | 2.72E-15  | 0.709493779 | 0.342 | 0.056 | 1.67E-10  | 6.11E+00    | T_cells        | SH3KBP1    |
| RPL291     | 5.44E-219 | 0.709221165 | 0.934 | 0.844 | 3.34E-214 | 1.11E+00    | Leydig_cells   | RPL29      |
| IQGAP12    | 5.55E-82  | 0.709188628 | 0.474 | 0.168 | 3.41E-77  | 2.82E+00    | VSM_cells      | IQGAP1     |
| FYTTD1     | 0         | 0.708969935 | 0.627 | 0.27  | 0         | 2.322222222 | spermatogonia  | FYTTD1     |
| SNU13      | 0         | 0.708920854 | 0.979 | 0.644 | 0         | 1.520186335 | spermatocyte   | SNU13      |
| LMAN2      | 0         | 0.708919962 | 0.713 | 0.476 | 0         | 1.49789916  | spermatogonia  | LMAN2      |
| RPS102     | 7.83E-79  | 0.708880948 | 0.814 | 0.536 | 4.80E-74  | 1.52E+00    | VSM_cells      | RPS10      |
| CLPTM1L    | 0         | 0.708764473 | 0.525 | 0.15  | 0         | 3.5         | spermatogonia  | CLPTM1L    |
| IFT22      | 0         | 0.70875558  | 0.925 | 0.475 | 0         | 1.947368421 | spermatocyte   | IFT22      |
| RIPK2      | 2.78E-57  | 0.708364274 | 0.283 | 0.064 | 1.71E-52  | 4.42E+00    | macrophages    | RIPK2      |
| COMMD8     | 0         | 0.708324251 | 0.775 | 0.221 | 0         | 3.50678733  | spermatocyte   | COMMD8     |
| GRHPR      | 8.48E-57  | 0.708244365 | 0.282 | 0.163 | 5.20E-52  | 1.73E+00    | Sertoli_cells  | GRHPR      |
| MT-CO33    | 3.36E-30  | 0.708092103 | 0.523 | 0.466 | 2.06E-25  | 1.12E+00    | Sertoli_cells  | MT-CO3     |
| ANXA51     | 6.36E-24  | 0.707919717 | 0.515 | 0.318 | 3.90E-19  | 1.62E+00    | macrophages    | ANXA5      |
| EEF1D3     | 2.37E-82  | 0.707903733 | 0.852 | 0.626 | 1.46E-77  | 1.36E+00    | VSM_cells      | EEF1D      |
| MEX3D      | 0         | 0.707757466 | 0.46  | 0.175 | 0         | 2.628571429 | spermatid      | MEX3D      |
| ABCA5      | 0         | 0.707538346 | 0.48  | 0.171 | 0         | 2.807017544 | spermatogonia  | ABCA5      |
| ATP5E1     | 1.61E-84  | 0.707459204 | 0.688 | 0.669 | 9.89E-80  | 1.03E+00    | Sertoli_cells  | ATP5E      |
| NCF4       | 0         | 0.707248096 | 0.226 | 0.001 | 0         | 226         | macrophages    | NCF4       |
| RPSA1      | 2.33E-94  | 0.707154516 | 0.891 | 0.618 | 1.43E-89  | 1.44E+00    | endotheliocyte | RPSA       |
| HNRNPC     | 0         | 0.707150422 | 0.773 | 0.576 | 0         | 1.342013889 | spermatogonia  | HNRNPC     |
| PLPP1      | 4.19E-88  | 0.707140414 | 0.464 | 0.277 | 2.57E-83  | 1.68E+00    | Leydig_cells   | PLPP1      |
| HECTD1     | 0         | 0.707126104 | 0.512 | 0.118 | 0         | 4.338983051 | spermatogonia  | HECTD1     |
| MYOCD1     | 0         | 0.706873125 | 0.391 | 0.037 | 0         | 10.56756757 | VSM_cells      | MYOCD      |
| XRCC5      | 0         | 0.706837178 | 0.755 | 0.497 | 0         | 1.519114688 | spermatogonia  | XRCC5      |
| RPL4       | 9.86E-78  | 0.70673635  | 0.906 | 0.749 | 6.05E-73  | 1.21E+00    | endotheliocyte | RPL4       |
| MYH91      | 4.09E-306 | 0.706711042 | 0.523 | 0.145 | 2.51E-301 | 3.61E+00    | PTM_cells      | MYH9       |
| GPSM3      | 9.20E-140 | 0.706690628 | 0.259 | 0.025 | 5.64E-135 | 1.04E+01    | macrophages    | GPSM3      |
| CAPZA2     | 3.79E-107 | 0.706498087 | 0.558 | 0.175 | 2.32E-102 | 3.19E+00    | endotheliocyte | CAPZA2     |
| RPS243     | 1.99E-244 | 0.706400231 | 0.945 | 0.883 | 1.22E-239 | 1.07E+00    | PTM_cells      | RPS24      |
| IGFBP2     | 0         | 0.706357269 | 0.352 | 0.076 | 0         | 4.631578947 | spermatogonia  | IGFBP2     |
| PPP1R36    | 0         | 0.706161317 | 0.93  | 0.364 | 0         | 2.554945055 | spermatocyte   | PPP1R36    |
| LAMC1      | 1.43E-174 | 0.705881089 | 0.361 | 0.103 | 8.76E-170 | 3.50E+00    | Leydig_cells   | LAMC1      |
| RPL26P19   | 5.01E-19  | 0.70580018  | 0.266 | 0.12  | 3.07E-14  | 2.22E+00    | macrophages    | RPL26P19   |
| AIMP2      | 0         | 0.705734007 | 0.912 | 0.337 | 0         | 2.706231454 | spermatocyte   | AIMP2      |
| PALLD1     | 1.82E-60  | 0.705625727 | 0.732 | 0.511 | 1.12E-55  | 1.43E+00    | VSM_cells      | PALLD      |
| CFH2       | 0         | 0.705508748 | 0.468 | 0.047 | 0         | 9.957446809 | PTM_cells      | CFH        |
| CDK12      | 0         | 0.705498272 | 0.571 | 0.227 | 0         | 2.515418502 | spermatogonia  | CDK12      |
| PDE3A      | 0         | 0.70524231  | 0.362 | 0.01  | 0         | 36.2        | VSM_cells      | PDE3A      |
| HNRNPA12   | 7.19E-127 | 0.70519612  | 0.76  | 0.598 | 4.41E-122 | 1.27E+00    | Leydig_cells   | HNRNPA1    |
| RPL36A1    | 7.74E-23  | 0.705133866 | 0.323 | 0.138 | 4.75E-18  | 2.34E+00    | macrophages    | RPL36A     |
| YWHAE      | 0         | 0.70510072  | 0.873 | 0.737 | 0         | 1.184531886 | spermatogonia  | YWHAE      |
| CDV3       | 0         | 0.704910981 | 0.667 | 0.454 | 0         | 1.469162996 | spermatid      | CDV3       |
| ADGB       | 0         | 0.704840903 | 0.871 | 0.252 | 0         | 3.456349206 | spermatocyte   | ADGB       |
| TNFSF13B   | 6.11E-206 | 0.704786881 | 0.215 | 0.011 | 3.75E-201 | 1.95E+01    | macrophages    | TNFSF13B   |
| RAB3IL1    | 0         | 0.704779905 | 0.568 | 0.261 | 0         | 2.176245211 | spermatid      | RAB3IL1    |
| SFPQ       | 0         | 0.704388487 | 0.752 | 0.522 | 0         | 1.440613027 | spermatogonia  | SFPQ       |
| RPS219     | 2.37E-110 | 0.704318616 | 0.647 | 0.517 | 1.45E-105 | 1.25E+00    | Sertoli_cells  | RPS21      |
| MYOCD      | 0         | 0.70431173  | 0.388 | 0.025 | 0         | 15.52       | PTM_cells      | MYOCD      |
| FCGRT3     | 0         | 0.704296914 | 0.577 | 0.175 | 0         | 3.297142857 | PTM_cells      | FCGRT      |
| IER34      | 6.15E-115 | 0.704245428 | 0.431 | 0.104 | 3.77E-110 | 4.14E+00    | VSM_cells      | IER3       |
| DMC1       | 0         | 0.704214749 | 0.287 | 0.016 | 0         | 17.9375     | spermatogonia  | DMC1       |
| MIDN4      | 8.94E-82  | 0.704116233 | 0.512 | 0.194 | 5.49E-77  | 2.64E+00    | VSM_cells      | MIDN       |
| OMD        | 0         | 0.703930866 | 0.302 | 0.014 | 0         | 21.57142857 | Leydig_cells   | OMD        |
| MMP14      | 0         | 0.703856178 | 0.266 | 0.021 | 0         | 12.66666667 | Leydig_cells   | MMP14      |
| MAGEB2     | 0         | 0.70295875  | 0.281 | 0.021 | 0         | 13.38095238 | spermatogonia  | MAGEB2     |
| S100A102   | 3.48E-61  | 0.702901517 | 0.546 | 0.433 | 2.14E-56  | 1.26E+00    | Sertoli_cells  | S100A10    |
| STAR       | 0         | 0.702836316 | 0.243 | 0.021 | 0         | 11.57142857 | Sertoli_cells  | STAR       |
| MAGEC2     | 0         | 0.70280314  | 0.352 | 0.018 | 0         | 19.55555556 | spermatogonia  | MAGEC2     |
| ARHGAP102  | 1.45E-115 | 0.702694178 | 0.474 | 0.137 | 8.90E-111 | 3.46E+00    | VSM_cells      | ARHGAP10   |
| YWHAQ      | 0         | 0.702619481 | 0.951 | 0.563 | 0         | 1.689165187 | spermatocyte   | YWHAQ      |
| MATR3      | 1.05E-303 | 0.70258953  | 0.331 | 0.138 | 6.43E-299 | 2.40E+00    | spermatogonia  | MATR3      |
| PGRMC11    | 0         | 0.702574033 | 0.52  | 0.103 | 0         | 5.048543689 | PTM_cells      | PGRMC1     |
| TMEM2      | 2.97E-12  | 0.702524572 | 0.237 | 0.035 | 1.82E-07  | 6.77E+00    | T_cells        | TMEM2      |
| RPL121     | 2.21E-28  | 0.702467566 | 0.751 | 0.634 | 1.35E-23  | 1.18E+00    | macrophages    | RPL12      |
| GEMIN6     | 0         | 0.70242156  | 0.834 | 0.241 | 0         | 3.460580913 | spermatocyte   | GEMIN6     |
| CKAP4      | 7.52E-248 | 0.702382201 | 0.362 | 0.08  | 4.62E-243 | 4.53E+00    | Leydig_cells   | CKAP4      |

|               |           |             |       |       |             |             |                |              |
|---------------|-----------|-------------|-------|-------|-------------|-------------|----------------|--------------|
| C11orf1       | 0         | 0.702298903 | 0.599 | 0.418 | 0           | 1.433014354 | spermatid      | C11orf1      |
| ERG           | 0         | 0.702032154 | 0.372 | 0.006 | 0           | 62          | endotheliocyte | ERG          |
| FAM134A       | 0         | 0.701959083 | 0.953 | 0.473 | 0           | 2.014799154 | spermatocyte   | FAM134A      |
| S1PR1         | 0         | 0.701769263 | 0.333 | 0.002 | 0           | 166.5       | endotheliocyte | S1PR1        |
| YWHAB         | 0         | 0.701409923 | 0.56  | 0.296 | 0           | 1.891891892 | spermatogonia  | YWHAB        |
| RAB14         | 0         | 0.70133401  | 0.661 | 0.357 | 0           | 1.851540616 | spermatogonia  | RAB14        |
| WAS           | 3.08E-297 | 0.701236195 | 0.215 | 0.007 | 1.89E-292   | 3.07E+01    | macrophages    | WAS          |
| TRIP11        | 0         | 0.701215054 | 0.557 | 0.227 | 0           | 2.453744493 | spermatogonia  | TRIP11       |
| CDC421        | 6.42E-74  | 0.701130854 | 0.749 | 0.412 | 3.94E-69    | 1.82E+00    | endotheliocyte | CDC42        |
| ZBTB16        | 6.14E-180 | 0.701111079 | 0.438 | 0.081 | 3.77E-175   | 5.41E+00    | VSM_cells      | ZBTB16       |
| FAM46A1       | 0         | 0.700757916 | 0.345 | 0.054 | 0           | 6.388888889 | Leydig_cells   | FAM46A       |
| TTC7A         | 0         | 0.700305677 | 0.487 | 0.191 | 0           | 2.54973822  | spermatid      | TTC7A        |
| RPL271        | 9.65E-32  | 0.700300906 | 0.774 | 0.662 | 5.92E-27    | 1.17E+00    | macrophages    | RPL27        |
| AKR1C1        | 6.00E-297 | 0.70022435  | 0.399 | 0.082 | 3.68E-292   | 4.87E+00    | Leydig_cells   | AKR1C1       |
| PMEPA1        | 3.42E-272 | 0.700118065 | 0.387 | 0.042 | 2.10E-267   | 9.21E+00    | VSM_cells      | PMEPA1       |
| THAP2         | 1.57E-06  | 0.700061403 | 0.421 | 0.38  | 0.096153417 | 1.107894737 | macrophages    | THAP2        |
| RPS31         | 6.99E-51  | 0.699805445 | 0.906 | 0.799 | 4.29E-46    | 1.13E+00    | macrophages    | RPS3         |
| C9orf3        | 3.09E-92  | 0.699637258 | 0.49  | 0.181 | 1.90E-87    | 2.71E+00    | VSM_cells      | C9orf3       |
| CNTRL         | 0         | 0.699527558 | 0.933 | 0.352 | 0           | 2.650568182 | spermatocyte   | CNTRL        |
| C11orf58      | 0         | 0.69950368  | 0.702 | 0.451 | 0           | 1.55654102  | spermatogonia  | C11orf58     |
| SH3PXD2A      | 0         | 0.699405232 | 0.312 | 0.039 | 0           | 8           | Leydig_cells   | SH3PXD2A     |
| RPS133        | 7.40E-88  | 0.699310991 | 0.905 | 0.84  | 4.54E-83    | 1.08E+00    | VSM_cells      | RPS13        |
| EEF1B24       | 2.30E-82  | 0.699192586 | 0.643 | 0.616 | 1.41E-77    | 1.04E+00    | Sertoli_cells  | EEF1B2       |
| RP5.1052M9.13 | 6.38E-41  | 0.699047591 | 0.301 | 0.202 | 3.91E-36    | 1.49E+00    | Sertoli_cells  | RP5.1052M9.1 |
| C11orf963     | 1.45E-96  | 0.698820283 | 0.444 | 0.265 | 8.87E-92    | 1.68E+00    | Sertoli_cells  | C11orf96     |
| SERINC1       | 4.42E-100 | 0.698786723 | 0.499 | 0.144 | 2.71E-95    | 3.47E+00    | endotheliocyte | SERINC1      |
| FEM1B         | 0         | 0.698649142 | 0.667 | 0.446 | 0           | 1.495515695 | spermatid      | FEM1B        |
| RPL235        | 3.04E-100 | 0.69864891  | 0.684 | 0.705 | 1.87E-95    | 9.70E-01    | Sertoli_cells  | RPL23        |
| ADO           | 0         | 0.698611108 | 0.95  | 0.416 | 0           | 2.283653846 | spermatocyte   | ADO          |
| MAP3K19       | 0         | 0.69853665  | 0.51  | 0.182 | 0           | 2.802197802 | spermatid      | MAP3K19      |
| RHOG          | 6.24E-87  | 0.698494996 | 0.283 | 0.045 | 3.83E-82    | 6.29E+00    | macrophages    | RHOG         |
| IFT81         | 0         | 0.698407083 | 0.538 | 0.285 | 0           | 1.887719298 | spermatogonia  | IFT81        |
| MEF2C         | 3.15E-87  | 0.698396434 | 0.476 | 0.15  | 1.93E-82    | 3.17E+00    | endotheliocyte | MEF2C        |
| SORBS3        | 0         | 0.698344248 | 0.622 | 0.323 | 0           | 1.925696594 | spermatid      | SORBS3       |
| C11orf311     | 6.65E-41  | 0.698293828 | 0.305 | 0.202 | 4.08E-36    | 1.51E+00    | Sertoli_cells  | C11orf31     |
| DDOST         | 0         | 0.698281471 | 0.589 | 0.305 | 0           | 1.931147541 | spermatogonia  | DDOST        |
| COMT1         | 0         | 0.698262545 | 0.499 | 0.085 | 0           | 5.870588235 | PTM_cells      | COMT         |
| ENAH          | 5.48E-144 | 0.698002562 | 0.56  | 0.299 | 3.36E-139   | 1.87E+00    | PTM_cells      | ENAH         |
| PLA2G5        | 2.14E-293 | 0.697953651 | 0.362 | 0.034 | 1.31E-288   | 1.06E+01    | VSM_cells      | PLA2G5       |
| FHAD1         | 0         | 0.697765469 | 0.605 | 0.312 | 0           | 1.939102564 | spermatid      | FHAD1        |
| LRRFIP13      | 6.51E-06  | 0.697743377 | 0.289 | 0.093 | 0.399456238 | 3.107526882 | T_cells        | LRRFIP1      |
| RND1          | 7.16E-226 | 0.697706547 | 0.256 | 0.019 | 4.39E-221   | 1.35E+01    | endotheliocyte | RND1         |
| HSP90AB11     | 3.47E-80  | 0.697694789 | 0.928 | 0.716 | 2.13E-75    | 1.30E+00    | endotheliocyte | HSP90AB1     |
| SKP1          | 0         | 0.697651261 | 0.884 | 0.731 | 0           | 1.209302326 | spermatogonia  | SKP1         |
| SCP2          | 7.21E-33  | 0.697312259 | 0.334 | 0.26  | 4.42E-28    | 1.28E+00    | Sertoli_cells  | SCP2         |
| RPL221        | 2.59E-161 | 0.697289249 | 0.82  | 0.641 | 1.59E-156   | 1.28E+00    | Leydig_cells   | RPL22        |
| PPT1          | 2.89E-13  | 0.697178435 | 0.343 | 0.221 | 1.77E-08    | 1.55E+00    | macrophages    | PPT1         |
| SLC15A3       | 2.17E-20  | 0.697028945 | 0.205 | 0.075 | 1.33E-15    | 2.73E+00    | macrophages    | SLC15A3      |
| MACF11        | 1.96E-76  | 0.697018958 | 0.571 | 0.248 | 1.20E-71    | 2.30E+00    | VSM_cells      | MACF1        |
| PTCH1         | 1.77E-94  | 0.696870926 | 0.403 | 0.187 | 1.09E-89    | 2.16E+00    | Leydig_cells   | PTCH1        |
| GAPDH         | 8.40E-202 | 0.696866206 | 0.883 | 0.806 | 5.15E-197   | 1.10E+00    | PTM_cells      | GAPDH        |
| SNRPG         | 0         | 0.696865128 | 0.653 | 0.36  | 0           | 1.813888889 | spermatogonia  | SNRPG        |
| HSPD11        | 4.93E-110 | 0.6967799   | 0.414 | 0.216 | 3.03E-105   | 1.92E+00    | Sertoli_cells  | HSPD1        |
| FAM186A       | 0         | 0.696742869 | 0.505 | 0.195 | 0           | 2.58974359  | spermatid      | FAM186A      |
| MARCKS2       | 1.00E-91  | 0.696739122 | 0.451 | 0.25  | 6.16E-87    | 1.80E+00    | Leydig_cells   | MARCKS       |
| RPL26L1       | 0         | 0.69672633  | 0.918 | 0.451 | 0           | 2.035476718 | spermatocyte   | RPL26L1      |
| APOL3         | 0         | 0.696559938 | 0.37  | 0.006 | 0           | 61.66666667 | endotheliocyte | APOL3        |
| CAMK1         | 2.83E-261 | 0.696242562 | 0.245 | 0.046 | 1.73E-256   | 5.33E+00    | Sertoli_cells  | CAMK1        |
| SYNPO         | 1.33E-227 | 0.696202486 | 0.362 | 0.038 | 8.18E-223   | 9.53E+00    | endotheliocyte | SYNPO        |
| RPL71         | 4.36E-170 | 0.695856321 | 0.903 | 0.791 | 2.67E-165   | 1.14E+00    | PTM_cells      | RPL7         |
| RPL13AP25     | 3.76E-06  | 0.695643342 | 0.186 | 0.126 | 0.23083354  | 1.476190476 | endotheliocyte | RPL13AP25    |
| IER33         | 5.92E-212 | 0.695458931 | 0.371 | 0.096 | 3.63E-207   | 3.86E+00    | PTM_cells      | IER3         |
| MYC2          | 0         | 0.695057403 | 0.436 | 0.052 | 0           | 8.384615385 | PTM_cells      | MYC          |
| STK33         | 0         | 0.695047888 | 0.909 | 0.36  | 0           | 2.525       | spermatocyte   | STK33        |
| MGST31        | 0         | 0.694936106 | 0.657 | 0.217 | 0           | 3.02764977  | PTM_cells      | MGST3        |
| PDIA6         | 0         | 0.694918529 | 0.516 | 0.198 | 0           | 2.606060606 | spermatogonia  | PDIA6        |
| SERPINB11     | 1.66E-73  | 0.694789825 | 0.29  | 0.053 | 1.02E-68    | 5.47E+00    | macrophages    | SERPINB1     |
| NDUFB3        | 0         | 0.694680152 | 0.904 | 0.361 | 0           | 2.504155125 | spermatocyte   | NDUFB3       |
| TTC29         | 0         | 0.694675504 | 0.971 | 0.457 | 0           | 2.124726477 | spermatocyte   | TTC29        |
| PLXND1        | 1.02E-267 | 0.69435027  | 0.397 | 0.039 | 6.26E-263   | 1.02E+01    | endotheliocyte | PLXND1       |
| UNC119        | 7.39E-285 | 0.694341957 | 0.235 | 0.039 | 4.53E-280   | 6.03E+00    | Sertoli_cells  | UNC119       |
| ROMO1         | 0         | 0.694330903 | 0.633 | 0.308 | 0           | 2.055194805 | spermatogonia  | ROMO1        |
| SPATA3-AS1    | 0         | 0.693799698 | 0.361 | 0.161 | 0           | 2.242236025 | spermatid      | SPATA3-AS1   |
| CD84          | 1.01E-277 | 0.693514333 | 0.226 | 0.009 | 6.18E-273   | 2.51E+01    | macrophages    | CD84         |
| PDGFRL        | 1.68E-221 | 0.693514314 | 0.376 | 0.096 | 1.03E-216   | 3.92E+00    | Leydig_cells   | PDGFRL       |

|               |             |             |       |       |             |             |                |               |
|---------------|-------------|-------------|-------|-------|-------------|-------------|----------------|---------------|
| IZUMO2        | 0           | 0.693046349 | 0.627 | 0.301 | 0           | 2.083056478 | spermatid      | IZUMO2        |
| RP4-665J23.1  | 0           | 0.692863029 | 0.552 | 0.174 | 0           | 3.172413793 | spermatocyte   | RP4-665J23.1  |
| TAPBP1        | 1.73E-12    | 0.692584834 | 0.263 | 0.042 | 1.06E-07    | 6.26E+00    | T_cells        | TAPBP         |
| NUCKS1        | 1.15E-68    | 0.692528847 | 0.712 | 0.397 | 7.03E-64    | 1.79E+00    | endotheliocyte | NUCKS1        |
| GOLGA7        | 0           | 0.692524351 | 0.627 | 0.263 | 0           | 2.384030418 | spermatogonia  | GOLGA7        |
| GNB2L11       | 2.57E-52    | 0.692430869 | 0.558 | 0.468 | 1.58E-47    | 1.19E+00    | Leydig_cells   | GNB2L1        |
| PKMYT1        | 0           | 0.692119108 | 0.515 | 0.257 | 0           | 2.003891051 | spermatogonia  | PKMYT1        |
| FRMD4B        | 3.62E-183   | 0.692078271 | 0.422 | 0.065 | 2.22E-178   | 6.49E+00    | endotheliocyte | FRMD4B        |
| LRRC6         | 0           | 0.691821082 | 0.892 | 0.269 | 0           | 3.31598513  | spermatocyte   | LRRC6         |
| GNAQ1         | 6.25E-35    | 0.691743245 | 0.337 | 0.122 | 3.84E-30    | 2.76E+00    | macrophages    | GNAQ          |
| REL2          | 0.000881989 | 0.691685879 | 0.263 | 0.114 | 1           | 2.307017544 | T_cells        | REL           |
| KIF5B         | 0           | 0.691640733 | 0.738 | 0.555 | 0           | 1.32972973  | spermatogonia  | KIF5B         |
| DYRK4         | 0           | 0.69150385  | 0.598 | 0.342 | 0           | 1.748538012 | spermatid      | DYRK4         |
| PDK4          | 3.29E-55    | 0.691467889 | 0.313 | 0.092 | 2.02E-50    | 3.40E+00    | endotheliocyte | PDK4          |
| HSPA4         | 0           | 0.691391189 | 0.681 | 0.404 | 0           | 1.685643564 | spermatogonia  | HSPA4         |
| RUVBL2        | 0           | 0.691299254 | 0.973 | 0.534 | 0           | 1.822097378 | spermatocyte   | RUVBL2        |
| PPIL6         | 0           | 0.691297804 | 0.87  | 0.308 | 0           | 2.824675325 | spermatocyte   | PPIL6         |
| TNFAIP8L1     | 0           | 0.691271266 | 0.54  | 0.227 | 0           | 2.378854626 | spermatid      | TNFAIP8L1     |
| HDAC7         | 9.57E-122   | 0.691216641 | 0.444 | 0.102 | 5.87E-117   | 4.35E+00    | endotheliocyte | HDAC7         |
| BRCA1         | 0           | 0.691174155 | 0.474 | 0.115 | 0           | 4.12173913  | spermatogonia  | BRCA1         |
| HINT1         | 0           | 0.691030895 | 0.968 | 0.635 | 0           | 1.524409449 | spermatocyte   | HINT1         |
| AC006019.3    | 0           | 0.690939095 | 0.584 | 0.25  | 0           | 2.336       | spermatid      | AC006019.3    |
| MRC2          | 1.21E-163   | 0.690938326 | 0.426 | 0.147 | 7.40E-159   | 2.90E+00    | Leydig_cells   | MRC2          |
| FXVD6         | 2.97E-191   | 0.690917193 | 0.326 | 0.1   | 1.82E-186   | 3.26E+00    | Sertoli_cells  | FXVD6         |
| MAF2          | 0           | 0.690886764 | 0.458 | 0.056 | 0           | 8.178571429 | PTM_cells      | MAF           |
| NDRG11        | 1.04E-291   | 0.690755562 | 0.293 | 0.06  | 6.37E-287   | 4.88E+00    | Sertoli_cells  | NDRG1         |
| S100PBP       | 0           | 0.690575719 | 0.542 | 0.164 | 0           | 3.304878049 | spermatogonia  | S100PBP       |
| RAB31         | 6.41E-56    | 0.690533575 | 0.354 | 0.093 | 3.93E-51    | 3.81E+00    | macrophages    | RAB31         |
| LTBP3         | 2.11E-254   | 0.690461255 | 0.364 | 0.077 | 1.29E-249   | 4.73E+00    | Leydig_cells   | LTBP3         |
| GATA2         | 2.37E-176   | 0.690454358 | 0.365 | 0.051 | 1.46E-171   | 7.16E+00    | endotheliocyte | GATA2         |
| SUN2          | 1.65E-203   | 0.690425581 | 0.273 | 0.071 | 1.01E-198   | 3.85E+00    | Sertoli_cells  | SUN2          |
| NPDC11        | 0           | 0.690388007 | 0.387 | 0.062 | 0           | 6.241935484 | Leydig_cells   | NPDC1         |
| SLC2A31       | 1.61E-165   | 0.69025265  | 0.316 | 0.084 | 9.85E-161   | 3.76E+00    | Leydig_cells   | SLC2A3        |
| PP2D1         | 0           | 0.690215358 | 0.576 | 0.215 | 0           | 2.679069767 | spermatid      | PP2D1         |
| EPS8          | 2.16E-66    | 0.69012929  | 0.457 | 0.191 | 1.33E-61    | 2.39E+00    | VSM_cells      | EPS8          |
| EPDR1         | 0           | 0.690105807 | 0.426 | 0.022 | 0           | 19.36363636 | PTM_cells      | EPDR1         |
| SNRPF         | 0           | 0.690064335 | 0.593 | 0.266 | 0           | 2.229323308 | spermatogonia  | SNRPF         |
| ATP5G23       | 2.09E-37    | 0.690062313 | 0.504 | 0.495 | 1.28E-32    | 1.02E+00    | Sertoli_cells  | ATP5G2        |
| INMT          | 0           | 0.689971351 | 0.335 | 0.039 | 0           | 8.58974359  | Leydig_cells   | INMT          |
| REEP3         | 0           | 0.689804023 | 0.846 | 0.323 | 0           | 2.619195046 | spermatocyte   | REEP3         |
| ATRX3         | 7.82E-117   | 0.689789673 | 0.51  | 0.143 | 4.80E-112   | 3.57E+00    | VSM_cells      | ATRX          |
| CSTB1         | 0           | 0.689692385 | 0.564 | 0.156 | 0           | 3.615384615 | PTM_cells      | CSTB          |
| MIR503HG      | 0           | 0.689479825 | 0.284 | 0.022 | 0           | 12.90909091 | Leydig_cells   | MIR503HG      |
| LINC01548     | 0           | 0.689094211 | 0.475 | 0.072 | 0           | 6.597222222 | spermatid      | LINC01548     |
| CKB           | 4.21E-168   | 0.689052035 | 0.826 | 0.684 | 2.58E-163   | 1.21E+00    | PTM_cells      | CKB           |
| ADAM2         | 0           | 0.689043948 | 0.736 | 0.162 | 0           | 4.543209877 | spermatocyte   | ADAM2         |
| KPNB1         | 0           | 0.688876817 | 0.763 | 0.501 | 0           | 1.522954092 | spermatogonia  | KPNB1         |
| FAM84A        | 3.59E-191   | 0.688749927 | 0.235 | 0.057 | 2.20E-186   | 4.12E+00    | Sertoli_cells  | FAM84A        |
| RHOXF1        | 0           | 0.688387539 | 0.253 | 0.011 | 0           | 23          | spermatogonia  | RHOXF1        |
| RPS7          | 8.44E-64    | 0.688197054 | 0.901 | 0.8   | 5.18E-59    | 1.13E+00    | endotheliocyte | RPS7          |
| ATP6V0E11     | 8.83E-202   | 0.688128061 | 0.616 | 0.286 | 5.42E-197   | 2.15E+00    | PTM_cells      | ATP6V0E1      |
| MRPL51        | 0           | 0.687817048 | 0.977 | 0.662 | 0           | 1.475830816 | spermatocyte   | MRPL51        |
| ARMC12        | 0           | 0.687577325 | 0.637 | 0.289 | 0           | 2.204152249 | spermatid      | ARMC12        |
| RNF168        | 0           | 0.687542818 | 0.59  | 0.275 | 0           | 2.145454545 | spermatid      | RNF168        |
| RP11.620J15.3 | 9.45E-104   | 0.687458547 | 0.212 | 0.115 | 5.80E-99    | 1.84E+00    | spermatogonia  | RP11.620J15.3 |
| MEAF6         | 0           | 0.687452189 | 0.622 | 0.333 | 0           | 1.867867868 | spermatogonia  | MEAF6         |
| MT-ND23       | 2.38E-203   | 0.687394609 | 0.765 | 0.395 | 1.46E-198   | 1.94E+00    | PTM_cells      | MT-ND2        |
| RPL84         | 1.20E-08    | 0.687291384 | 0.947 | 0.855 | 0.000733148 | 1.107602339 | T_cells        | RPL8          |
| TEPP          | 0           | 0.687087171 | 0.514 | 0.145 | 0           | 3.544827586 | spermatid      | TEPP          |
| HNRNPD        | 0           | 0.686797121 | 0.66  | 0.348 | 0           | 1.896551724 | spermatogonia  | HNRNPD        |
| LCP1          | 0           | 0.686727197 | 0.53  | 0.178 | 0           | 2.97752809  | spermatid      | LCP1          |
| C15orf39      | 0           | 0.686545709 | 0.811 | 0.233 | 0           | 3.480686695 | spermatocyte   | C15orf39      |
| PTGIS1        | 0           | 0.686364395 | 0.395 | 0.025 | 0           | 15.8        | PTM_cells      | PTGIS         |
| DES12         | 0           | 0.686313984 | 0.947 | 0.444 | 0           | 2.132882883 | spermatocyte   | DES12         |
| GPC2          | 0.000115995 | 0.686148586 | 0.34  | 0.162 | 1           | 2.098765432 | mastocyte      | GPC2          |
| PLD4          | 0           | 0.685999229 | 0.226 | 0.007 | 0           | 32.28571429 | macrophages    | PLD4          |
| EHBP1         | 0           | 0.68588848  | 0.608 | 0.37  | 0           | 1.643243243 | spermatid      | EHBP1         |
| LTBP1         | 4.16E-200   | 0.685786178 | 0.37  | 0.095 | 2.55E-195   | 3.89E+00    | Leydig_cells   | LTBP1         |
| ZNF518A       | 0           | 0.685762006 | 0.485 | 0.168 | 0           | 2.886904762 | spermatogonia  | ZNF518A       |
| LRRC75A.AS1   | 0.008159124 | 0.685657618 | 0.186 | 0.161 | 1           | 1.155279503 | endotheliocyte | LRRC75A.AS1   |
| CYP1B11       | 1.28E-217   | 0.685597276 | 0.443 | 0.149 | 7.87E-213   | 2.97E+00    | PTM_cells      | CYP1B1        |
| RPL244        | 1.19E-05    | 0.685572397 | 0.789 | 0.743 | 0.731516052 | 1.061911171 | T_cells        | RPL24         |
| SPACA1        | 3.00E-158   | 0.685570293 | 0.522 | 0.407 | 1.84E-153   | 1.28E+00    | spermatid      | SPACA1        |
| TCHH          | 1.34E-36    | 0.685470412 | 0.152 | 0.028 | 8.19E-32    | 5.43E+00    | macrophages    | TCHH          |
| MYADM4        | 0.000814848 | 0.685367609 | 0.395 | 0.224 | 1           | 1.763392857 | T_cells        | MYADM         |

|               |             |             |       |       |             |             |                |               |
|---------------|-------------|-------------|-------|-------|-------------|-------------|----------------|---------------|
| TTC25         | 0           | 0.685282541 | 0.914 | 0.29  | 0           | 3.151724138 | spermatocyte   | TTC25         |
| RPL304        | 1.21E-85    | 0.685221712 | 0.93  | 0.878 | 7.43E-81    | 1.06E+00    | VSM_cells      | RPL30         |
| PRKCH1        | 1.09E-05    | 0.685211673 | 0.237 | 0.069 | 0.665974968 | 3.434782609 | T_cells        | PRKCH         |
| SAFB          | 0           | 0.685157905 | 0.546 | 0.146 | 0           | 3.739726027 | spermatogonia  | SAFB          |
| TJP11         | 1.26E-68    | 0.685039045 | 0.596 | 0.273 | 7.70E-64    | 2.18E+00    | endotheliocyte | TJP1          |
| BBOF1         | 0           | 0.684844894 | 0.907 | 0.33  | 0           | 2.748484848 | spermatocyte   | BBOF1         |
| WIPF3         | 0           | 0.684794189 | 0.262 | 0.043 | 0           | 6.093023256 | Sertoli_cells  | WIPF3         |
| MTPN          | 0           | 0.684686103 | 0.58  | 0.306 | 0           | 1.895424837 | spermatogonia  | MTPN          |
| CLEC2D        | 0.006303045 | 0.684674716 | 0.316 | 0.191 | 1           | 1.654450262 | T_cells        | CLEC2D        |
| LINC00929     | 0           | 0.684637017 | 0.523 | 0.198 | 0           | 2.641414141 | spermatid      | LINC00929     |
| NRN1          | 0           | 0.684628839 | 0.335 | 0.001 | 0           | 335         | endotheliocyte | NRN1          |
| RPS151        | 1.00E-147   | 0.68456047  | 0.869 | 0.762 | 6.14E-143   | 1.14E+00    | Leydig_cells   | RPS15         |
| SENP6         | 0           | 0.684420204 | 0.569 | 0.229 | 0           | 2.484716157 | spermatogonia  | SENP6         |
| EHD22         | 1.59E-296   | 0.684312372 | 0.412 | 0.043 | 9.77E-292   | 9.58E+00    | VSM_cells      | EHD2          |
| MORN5         | 0           | 0.684282469 | 0.918 | 0.397 | 0           | 2.312342569 | spermatocyte   | MORN5         |
| ZFP365        | 2.06E-07    | 0.684269974 | 0.579 | 0.244 | 0.012610776 | 2.37295082  | T_cells        | ZFP36         |
| GAS2L1        | 1.05E-88    | 0.68424033  | 0.298 | 0.147 | 6.45E-84    | 2.03E+00    | Sertoli_cells  | GAS2L1        |
| ADH51         | 5.67E-200   | 0.684223328 | 0.594 | 0.284 | 3.48E-195   | 2.09E+00    | PTM_cells      | ADH5          |
| SELM1         | 2.30E-152   | 0.684214124 | 0.496 | 0.206 | 1.41E-147   | 2.41E+00    | Leydig_cells   | SELM          |
| UBN1          | 0           | 0.684136978 | 0.638 | 0.386 | 0           | 1.652849741 | spermatogonia  | UBN1          |
| YWHAB5        | 6.83E-05    | 0.684065968 | 0.579 | 0.353 | 1           | 1.640226629 | T_cells        | YWHAB         |
| MT.ND42       | 4.69E-09    | 0.684033024 | 0.381 | 0.374 | 0.0002879   | 1.018716578 | Leydig_cells   | MT.ND4        |
| VARS          | 0           | 0.683971638 | 0.601 | 0.322 | 0           | 1.866459627 | spermatid      | VARS          |
| PPM1K         | 4.99E-64    | 0.6838275   | 0.332 | 0.209 | 3.06E-59    | 1.59E+00    | Sertoli_cells  | PPM1K         |
| FMNL1         | 3.55E-165   | 0.683793678 | 0.246 | 0.019 | 2.18E-160   | 1.29E+01    | macrophages    | FMNL1         |
| UBLCP1        | 0           | 0.683788964 | 0.538 | 0.151 | 0           | 3.562913907 | spermatogonia  | UBLCP1        |
| SPAG1         | 0           | 0.683753017 | 0.847 | 0.212 | 0           | 3.995283019 | spermatocyte   | SPAG1         |
| SNRPA1        | 0           | 0.683535255 | 0.798 | 0.251 | 0           | 3.179282869 | spermatocyte   | SNRPA1        |
| MT-ND12       | 7.60E-78    | 0.683492761 | 0.603 | 0.403 | 4.66E-73    | 1.50E+00    | Leydig_cells   | MT-ND1        |
| PSMA8         | 0           | 0.68347365  | 0.456 | 0.208 | 0           | 2.192307692 | spermatogonia  | PSMA8         |
| CSMD2-AS1     | 6.01E-264   | 0.68337566  | 0.387 | 0.233 | 3.69E-259   | 1.66E+00    | spermatid      | CSMD2-AS1     |
| MYADM2        | 1.40E-214   | 0.683296956 | 0.54  | 0.208 | 8.56E-210   | 2.60E+00    | PTM_cells      | MYADM         |
| HSPB11        | 2.98E-183   | 0.683231268 | 0.557 | 0.207 | 1.83E-178   | 2.69E+00    | Leydig_cells   | HSPB1         |
| RP11.466H18.1 | 2.28E-44    | 0.683188397 | 0.169 | 0.037 | 1.40E-39    | 4.57E+00    | endotheliocyte | RP11.466H18.1 |
| RPL303        | 2.21E-246   | 0.683056222 | 0.936 | 0.876 | 1.36E-241   | 1.07E+00    | PTM_cells      | RPL30         |
| NUDT4         | 0           | 0.683050276 | 0.863 | 0.254 | 0           | 3.397637795 | spermatocyte   | NUDT4         |
| DNPEP         | 0           | 0.683039869 | 0.626 | 0.375 | 0           | 1.669333333 | spermatid      | DNPEP         |
| NDUFC1        | 0           | 0.682984861 | 0.933 | 0.477 | 0           | 1.955974843 | spermatocyte   | NDUFC1        |
| SRSF21        | 0.008960714 | 0.682698275 | 0.553 | 0.518 | 1           | 1.067567568 | T_cells        | SRSF2         |
| BCLAF1        | 0           | 0.682603447 | 0.648 | 0.289 | 0           | 2.242214533 | spermatogonia  | BCLAF1        |
| TMEM47        | 0           | 0.682355257 | 0.352 | 0.033 | 0           | 10.66666667 | Leydig_cells   | TMEM47        |
| MT.ATP81      | 2.78E-24    | 0.682238071 | 0.38  | 0.174 | 1.71E-19    | 2.18E+00    | macrophages    | MT.ATP8       |
| FANCI         | 0           | 0.681856189 | 0.484 | 0.102 | 0           | 4.745098039 | spermatogonia  | FANCI         |
| ACR           | 0           | 0.681527379 | 0.916 | 0.301 | 0           | 3.043189369 | spermatocyte   | ACR           |
| ELOVL5        | 1.51E-35    | 0.681483178 | 0.364 | 0.302 | 9.24E-31    | 1.21E+00    | Sertoli_cells  | ELOVL5        |
| ARL6IP11      | 1.99E-48    | 0.681283618 | 0.715 | 0.463 | 1.22E-43    | 1.54E+00    | endotheliocyte | ARL6IP1       |
| MRPS33        | 0           | 0.681211666 | 0.834 | 0.318 | 0           | 2.622641509 | spermatocyte   | MRPS33        |
| GMPS          | 0           | 0.681172082 | 0.959 | 0.488 | 0           | 1.965163934 | spermatocyte   | GMPS          |
| PTK7          | 0           | 0.681103662 | 0.394 | 0.105 | 0           | 3.752380952 | spermatid      | PTK7          |
| CRTAP2        | 0           | 0.681030398 | 0.495 | 0.089 | 0           | 5.561797753 | PTM_cells      | CRTAP         |
| GBP1          | 0           | 0.680618463 | 0.35  | 0.018 | 0           | 19.44444444 | endotheliocyte | GBP1          |
| C9orf116      | 0           | 0.680371255 | 0.838 | 0.357 | 0           | 2.347338936 | spermatocyte   | C9orf116      |
| PTMAP5        | 3.57E-32    | 0.680300705 | 0.222 | 0.063 | 2.19E-27    | 3.52E+00    | macrophages    | PTMAP5        |
| GLO11         | 1.20E-196   | 0.680210682 | 0.395 | 0.113 | 7.39E-192   | 3.50E+00    | Leydig_cells   | GLO1          |
| EIF4A2        | 0           | 0.680078532 | 0.719 | 0.397 | 0           | 1.811083123 | spermatogonia  | EIF4A2        |
| RPS215        | 8.40E-244   | 0.680017416 | 0.898 | 0.666 | 5.15E-239   | 1.35E+00    | PTM_cells      | RPS2          |
| MAP2K3        | 3.59E-107   | 0.679975338 | 0.253 | 0.03  | 2.20E-102   | 8.43E+00    | macrophages    | MAP2K3        |
| NRP21         | 7.05E-37    | 0.67984808  | 0.232 | 0.062 | 4.32E-32    | 3.74E+00    | macrophages    | NRP2          |
| MSN2          | 4.42E-222   | 0.679646543 | 0.44  | 0.064 | 2.71E-217   | 6.88E+00    | VSM_cells      | MSN           |
| GPRIN3        | 4.69E-44    | 0.679387056 | 0.184 | 0.006 | 2.88E-39    | 3.07E+01    | T_cells        | GPRIN3        |
| MAPRE2        | 2.48E-203   | 0.67932657  | 0.412 | 0.065 | 1.52E-198   | 6.34E+00    | VSM_cells      | MAPRE2        |
| SEMA7A        | 0           | 0.679194839 | 0.226 | 0.018 | 0           | 12.55555556 | Sertoli_cells  | SEMA7A        |
| GZMB          | 8.11E-120   | 0.679028883 | 0.105 | 0.001 | 4.98E-115   | 1.05E+02    | T_cells        | GZMB          |
| PFKL          | 2.80E-247   | 0.67826955  | 0.264 | 0.056 | 1.72E-242   | 4.71E+00    | Sertoli_cells  | PFKL          |
| TMEM471       | 0           | 0.678242663 | 0.404 | 0.04  | 0           | 10.1        | VSM_cells      | TMEM47        |
| HYAL2         | 6.92E-96    | 0.678031097 | 0.38  | 0.089 | 4.25E-91    | 4.27E+00    | endotheliocyte | HYAL2         |
| RPS27         | 1.29E-63    | 0.677993129 | 0.955 | 0.821 | 7.93E-59    | 1.16E+00    | endotheliocyte | RPS27         |
| PGRMC1        | 3.60E-268   | 0.677990414 | 0.45  | 0.109 | 2.21E-263   | 4.13E+00    | Leydig_cells   | PGRMC1        |
| PLAC8L1       | 0           | 0.677952768 | 0.564 | 0.238 | 0           | 2.369747899 | spermatid      | PLAC8L1       |
| CFH           | 6.59E-184   | 0.677915727 | 0.427 | 0.062 | 4.04E-179   | 6.89E+00    | endotheliocyte | CFH           |
| DNAJA2        | 0           | 0.67787324  | 0.694 | 0.442 | 0           | 1.570135747 | spermatogonia  | DNAJA2        |
| MS4A4A        | 0           | 0.677741055 | 0.202 | 0.003 | 0           | 67.33333333 | macrophages    | MS4A4A        |
| CLDND1        | 0           | 0.677725186 | 0.927 | 0.348 | 0           | 2.663793103 | spermatocyte   | CLDND1        |
| RBBP4         | 0           | 0.67766514  | 0.608 | 0.315 | 0           | 1.93015873  | spermatogonia  | RBBP4         |
| RPL192        | 1.55E-209   | 0.677458016 | 0.932 | 0.834 | 9.51E-205   | 1.12E+00    | PTM_cells      | RPL19         |

|               |             |             |       |       |             |              |                |               |
|---------------|-------------|-------------|-------|-------|-------------|--------------|----------------|---------------|
| DYNLT1        | 0           | 0.676890993 | 0.879 | 0.435 | 0           | 2.020689655  | spermatocyte   | DYNLT1        |
| LSM7          | 0           | 0.67685827  | 0.441 | 0.144 | 0           | 3.0625       | spermatogonia  | LSM7          |
| RPL241        | 3.04E-126   | 0.676842591 | 0.837 | 0.739 | 1.86E-121   | 1.13E+00     | Leydig_cells   | RPL24         |
| MARCKSL11     | 0           | 0.676759905 | 0.64  | 0.204 | 0           | 3.137254902  | PTM_cells      | MARCKSL1      |
| TOP2B         | 0           | 0.676551993 | 0.337 | 0.068 | 0           | 4.955882353  | spermatogonia  | TOP2B         |
| MYH10         | 4.34E-42    | 0.676405157 | 0.404 | 0.199 | 2.66E-37    | 2.03E+00     | VSM_cells      | MYH10         |
| CCND31        | 1.42E-08    | 0.67632623  | 0.316 | 0.082 | 0.000871763 | 3.853658537  | T_cells        | CCND3         |
| PRKDC         | 0           | 0.676258708 | 0.549 | 0.203 | 0           | 2.704433498  | spermatogonia  | PRKDC         |
| RPL36AL       | 6.46E-63    | 0.676186294 | 0.801 | 0.624 | 3.97E-58    | 1.28E+00     | VSM_cells      | RPL36AL       |
| NEIL2         | 0           | 0.675740702 | 0.375 | 0.042 | 0           | 8.928571429  | spermatogonia  | NEIL2         |
| RPL27A5       | 7.81E-157   | 0.675720864 | 0.784 | 0.787 | 4.79E-152   | 9.96E-01     | Sertoli_cells  | RPL27A        |
| CYP26B11      | 0           | 0.675625039 | 0.353 | 0.038 | 0           | 9.289473684  | PTM_cells      | CYP26B1       |
| COX8A         | 6.25E-87    | 0.67550877  | 0.569 | 0.225 | 3.83E-82    | 2.53E+00     | VSM_cells      | COX8A         |
| CARMN         | 0           | 0.675490765 | 0.311 | 0.015 | 0           | 20.733333333 | VSM_cells      | CARMN         |
| MDH1          | 4.34E-52    | 0.675472766 | 0.336 | 0.221 | 2.66E-47    | 1.52E+00     | Sertoli_cells  | MDH1          |
| COL4A1        | 5.75E-261   | 0.675427546 | 0.37  | 0.04  | 3.53E-256   | 9.25E+00     | VSM_cells      | COL4A1        |
| ARPC3         | 4.60E-14    | 0.675388994 | 0.572 | 0.535 | 2.82E-09    | 1.07E+00     | macrophages    | ARPC3         |
| IL1A          | 1.79E-37    | 0.675384765 | 0.205 | 0.049 | 1.10E-32    | 4.18E+00     | macrophages    | IL1A          |
| GAS5          | 1.29E-12    | 0.675149786 | 0.146 | 0.065 | 7.92E-08    | 2.25E+00     | endotheliocyte | GAS5          |
| TGFB11        | 1.52E-12    | 0.675087916 | 0.263 | 0.042 | 9.32E-08    | 6.26E+00     | T_cells        | TGFB1         |
| IDH1          | 7.87E-97    | 0.675036476 | 0.27  | 0.117 | 4.83E-92    | 2.31E+00     | Sertoli_cells  | IDH1          |
| RAP2B         | 1.42E-108   | 0.674827681 | 0.253 | 0.029 | 8.71E-104   | 8.72E+00     | macrophages    | RAP2B         |
| NACA1         | 3.64E-138   | 0.674825635 | 0.855 | 0.745 | 2.24E-133   | 1.15E+00     | Leydig_cells   | NACA          |
| LPAR6         | 0           | 0.674712456 | 0.533 | 0.193 | 0           | 2.761658031  | spermatid      | LPAR6         |
| C2orf401      | 3.16E-39    | 0.674480585 | 0.712 | 0.453 | 1.94E-34    | 1.57E+00     | VSM_cells      | C2orf40       |
| TCERG1        | 0           | 0.674327528 | 0.535 | 0.154 | 0           | 3.474025974  | spermatogonia  | TCERG1        |
| CNTN4         | 0           | 0.674035594 | 0.53  | 0.22  | 0           | 2.409090909  | spermatid      | CNTN4         |
| YWHAZ         | 0           | 0.673791897 | 0.802 | 0.732 | 0           | 1.095628415  | spermatid      | YWHAZ         |
| TEX36-AS1     | 0           | 0.673760032 | 0.336 | 0.111 | 0           | 3.027027027  | spermatid      | TEX36-AS1     |
| RP11-195F19.5 | 3.26E-173   | 0.673649963 | 0.494 | 0.444 | 2.00E-168   | 1.11E+00     | spermatid      | RP11-195F19.5 |
| YIPF2         | 0           | 0.673629917 | 0.894 | 0.304 | 0           | 2.940789474  | spermatocyte   | YIPF2         |
| DNAJC1        | 8.13E-253   | 0.673525236 | 0.414 | 0.231 | 4.99E-248   | 1.79E+00     | spermatogonia  | DNAJC1        |
| LIMCH1        | 6.99E-51    | 0.673419568 | 0.459 | 0.208 | 4.29E-46    | 2.21E+00     | endotheliocyte | LIMCH1        |
| LINC01206     | 1.90E-191   | 0.673371358 | 0.366 | 0.221 | 1.16E-186   | 1.66E+00     | spermatogonia  | LINC01206     |
| CFAP36        | 0           | 0.673361225 | 0.986 | 0.589 | 0           | 1.674023769  | spermatocyte   | CFAP36        |
| CD81          | 3.85E-70    | 0.673208975 | 0.667 | 0.312 | 2.36E-65    | 2.14E+00     | endotheliocyte | CD81          |
| C11orf31      | 0           | 0.673181317 | 0.49  | 0.131 | 0           | 3.740458015  | spermatogonia  | C11orf31      |
| S1PR3         | 0           | 0.67307237  | 0.294 | 0.008 | 0           | 36.75        | VSM_cells      | S1PR3         |
| YWHAB2        | 5.53E-25    | 0.672778241 | 0.566 | 0.351 | 3.39E-20    | 1.61E+00     | macrophages    | YWHAB         |
| AC109829.1    | 0           | 0.672770666 | 0.438 | 0.162 | 0           | 2.703703704  | spermatid      | AC109829.1    |
| CYB5R31       | 1.73E-262   | 0.672715498 | 0.594 | 0.212 | 1.06E-257   | 2.80E+00     | PTM_cells      | CYB5R3        |
| PHLDA1        | 1.35E-137   | 0.672701056 | 0.385 | 0.066 | 8.30E-133   | 5.83E+00     | endotheliocyte | PHLDA1        |
| FABP5         | 0           | 0.672699497 | 0.503 | 0.208 | 0           | 2.418269231  | spermatogonia  | FABP5         |
| LRR39         | 0           | 0.672675138 | 0.466 | 0.112 | 0           | 4.160714286  | spermatocyte   | LRR39         |
| C11orf63      | 0           | 0.672309565 | 0.84  | 0.216 | 0           | 3.888888889  | spermatocyte   | C11orf63      |
| CCDC126       | 0           | 0.672045456 | 0.609 | 0.371 | 0           | 1.641509434  | spermatid      | CCDC126       |
| SYNGR4        | 0           | 0.672025971 | 0.448 | 0.259 | 0           | 1.72972973   | spermatogonia  | SYNGR4        |
| HPRT1         | 0           | 0.671971773 | 0.431 | 0.091 | 0           | 4.736263736  | spermatogonia  | HPRT1         |
| TNS1          | 1.69E-206   | 0.67180151  | 0.379 | 0.094 | 1.04E-201   | 4.03E+00     | Leydig_cells   | TNS1          |
| GOLM1         | 0           | 0.671798553 | 0.513 | 0.237 | 0           | 2.164556962  | spermatid      | GOLM1         |
| VCL1          | 1.70E-118   | 0.671790256 | 0.293 | 0.119 | 1.04E-113   | 2.46E+00     | Sertoli_cells  | VCL           |
| UBB           | 0           | 0.671732064 | 0.999 | 0.929 | 0           | 1.075349839  | spermatocyte   | UBB           |
| KCNA5         | 0           | 0.671716662 | 0.349 | 0.001 | 0           | 349          | VSM_cells      | KCNA5         |
| PLSCR1        | 3.24E-285   | 0.671574367 | 0.437 | 0.044 | 1.99E-280   | 9.93E+00     | endotheliocyte | PLSCR1        |
| RPL411        | 3.78E-49    | 0.671537836 | 0.909 | 0.786 | 2.32E-44    | 1.16E+00     | macrophages    | RPL41         |
| RAN           | 0           | 0.671459212 | 0.884 | 0.611 | 0           | 1.446808511  | spermatogonia  | RAN           |
| SASH1         | 0           | 0.671379851 | 0.407 | 0.035 | 0           | 11.62857143  | endotheliocyte | SASH1         |
| PGLS          | 0.003611884 | 0.671235533 | 0.342 | 0.207 | 1           | 1.652173913  | T_cells        | PGLS          |
| EEF1B23       | 1.09E-61    | 0.67120284  | 0.789 | 0.615 | 6.70E-57    | 1.28E+00     | VSM_cells      | EEF1B2        |
| RPL351        | 6.67E-05    | 0.671075702 | 0.895 | 0.843 | 1           | 1.06168446   | T_cells        | RPL35         |
| ACTL10        | 0           | 0.671023669 | 0.594 | 0.256 | 0           | 2.3203125    | spermatid      | ACTL10        |
| ATP6V0E1      | 3.71E-131   | 0.670964958 | 0.558 | 0.291 | 2.27E-126   | 1.92E+00     | Leydig_cells   | ATP6V0E1      |
| ATRX1         | 3.01E-191   | 0.670914636 | 0.443 | 0.137 | 1.85E-186   | 3.23E+00     | Leydig_cells   | ATRX          |
| TNFRSF10D     | 2.85E-214   | 0.67084332  | 0.3   | 0.028 | 1.75E-209   | 1.07E+01     | endotheliocyte | TNFRSF10D     |
| C9orf135-AS1  | 0           | 0.670799972 | 0.557 | 0.184 | 0           | 3.027173913  | spermatocyte   | C9orf135-AS1  |
| ATF4          | 2.22E-53    | 0.670538254 | 0.648 | 0.354 | 1.36E-48    | 1.83E+00     | endotheliocyte | ATF4          |
| TAP11         | 1.26E-11    | 0.670512239 | 0.211 | 0.029 | 7.71E-07    | 7.28E+00     | T_cells        | TAP1          |
| MT-CO21       | 2.03E-71    | 0.67030366  | 0.609 | 0.429 | 1.24E-66    | 1.42E+00     | Leydig_cells   | MT-CO2        |
| MXRA71        | 0           | 0.670246071 | 0.481 | 0.111 | 0           | 4.333333333  | PTM_cells      | MXRA7         |
| TMEM123       | 1.92E-22    | 0.670202313 | 0.394 | 0.203 | 1.18E-17    | 1.94E+00     | macrophages    | TMEM123       |
| TRIM69        | 0           | 0.670123611 | 0.883 | 0.307 | 0           | 2.876221498  | spermatocyte   | TRIM69        |
| AR            | 0           | 0.670062083 | 0.338 | 0.054 | 0           | 6.259259259  | Leydig_cells   | AR            |
| CNN32         | 1.66E-162   | 0.669868822 | 0.623 | 0.351 | 1.02E-157   | 1.77E+00     | PTM_cells      | CNN3          |
| APOC11        | 0           | 0.669652749 | 0.354 | 0.022 | 0           | 16.09090909  | PTM_cells      | APOC1         |
| PLEK1         | 9.57E-29    | 0.669622922 | 0.263 | 0.019 | 5.87E-24    | 1.38E+01     | T_cells        | PLEK          |

|              |             |             |       |       |             |             |                |              |
|--------------|-------------|-------------|-------|-------|-------------|-------------|----------------|--------------|
| GJA5         | 1.72E-11    | 0.669559515 | 0.146 | 0.069 | 1.06E-06    | 2.12E+00    | endotheliocyte | GJA5         |
| APLP21       | 7.48E-27    | 0.669537947 | 0.545 | 0.321 | 4.59E-22    | 1.70E+00    | macrophages    | APLP2        |
| RP5.956O18.2 | 0           | 0.669196281 | 0.257 | 0.03  | 0           | 8.566666667 | spermatid      | RP5.956O18.2 |
| H2AFY        | 1.35E-15    | 0.669039    | 0.481 | 0.347 | 8.28E-11    | 1.39E+00    | macrophages    | H2AFY        |
| HLA-DMA      | 0           | 0.668961786 | 0.395 | 0.013 | 0           | 30.38461538 | endotheliocyte | HLA-DMA      |
| RPL33        | 1.17E-213   | 0.668797663 | 0.974 | 0.921 | 7.16E-209   | 1.06E+00    | Leydig_cells   | RPL3         |
| PPP1R42      | 0           | 0.668772522 | 0.774 | 0.151 | 0           | 5.125827815 | spermatocyte   | PPP1R42      |
| ARIH2        | 0           | 0.668735931 | 0.571 | 0.244 | 0           | 2.340163934 | spermatogonia  | ARIH2        |
| RGS12        | 1.22E-25    | 0.66872013  | 0.211 | 0.013 | 7.46E-21    | 1.62E+01    | T_cells        | RGS1         |
| ATXN7        | 0.001255573 | 0.668656581 | 0.316 | 0.163 | 1           | 1.938650307 | T_cells        | ATXN7        |
| CTD-2538C1.2 | 0           | 0.668609575 | 0.535 | 0.148 | 0           | 3.614864865 | spermatocyte   | CTD-2538C1.2 |
| MYL12B1      | 7.69E-37    | 0.668467751 | 0.582 | 0.629 | 4.71E-32    | 9.25E-01    | Sertoli_cells  | MYL12B       |
| NID1         | 0           | 0.668462421 | 0.27  | 0.021 | 0           | 12.85714286 | Leydig_cells   | NID1         |
| ADRBK1       | 4.04E-07    | 0.668367142 | 0.184 | 0.036 | 0.024805996 | 5.111111111 | T_cells        | ADRBK1       |
| YBX2         | 0           | 0.668322496 | 0.988 | 0.61  | 0           | 1.619672131 | spermatocyte   | YBX2         |
| EIF3K        | 1.33E-62    | 0.668214815 | 0.722 | 0.482 | 8.18E-58    | 1.50E+00    | endotheliocyte | EIF3K        |
| TIMM23       | 0           | 0.668088192 | 0.882 | 0.306 | 0           | 2.882352941 | spermatocyte   | TIMM23       |
| RPS245       | 6.81E-08    | 0.667899594 | 0.947 | 0.886 | 0.004179126 | 1.068848758 | T_cells        | RPS24        |
| PSMD4        | 0           | 0.667816057 | 0.968 | 0.52  | 0           | 1.861538462 | spermatocyte   | PSMD4        |
| CTSD1        | 1.21E-119   | 0.667605497 | 0.338 | 0.148 | 7.44E-115   | 2.28E+00    | Sertoli_cells  | CTSD         |
| RPS51        | 2.95E-174   | 0.667603484 | 0.895 | 0.815 | 1.81E-169   | 1.10E+00    | Leydig_cells   | RPS5         |
| TKT          | 5.69E-197   | 0.667597199 | 0.455 | 0.147 | 3.49E-192   | 3.10E+00    | Leydig_cells   | TKT          |
| MT-ND3       | 1.83E-158   | 0.667574076 | 0.482 | 0.346 | 1.12E-153   | 1.39E+00    | spermatogonia  | MT-ND3       |
| ERP29        | 0           | 0.667570554 | 0.465 | 0.136 | 0           | 3.419117647 | spermatogonia  | ERP29        |
| RPA2         | 0           | 0.667548597 | 0.645 | 0.39  | 0           | 1.653846154 | spermatogonia  | RPA2         |
| NDUFB4       | 0           | 0.667388298 | 0.956 | 0.561 | 0           | 1.704099822 | spermatocyte   | NDUFB4       |
| CDA          | 0           | 0.667324412 | 0.395 | 0.003 | 0           | 131.6666667 | endotheliocyte | CDA          |
| USP1         | 0           | 0.667266802 | 0.948 | 0.455 | 0           | 2.083516484 | spermatocyte   | USP1         |
| CCDC67       | 0           | 0.666997961 | 0.718 | 0.33  | 0           | 2.175757576 | spermatocyte   | CCDC67       |
| SLA          | 0           | 0.666991276 | 0.182 | 0.002 | 0           | 91          | macrophages    | SLA          |
| WFDC6        | 0           | 0.66698929  | 0.208 | 0.007 | 0           | 29.71428571 | Sertoli_cells  | WFDC6        |
| KTN1         | 0           | 0.666950528 | 0.99  | 0.681 | 0           | 1.453744493 | spermatocyte   | KTN1         |
| CIRBP1       | 2.07E-71    | 0.666907819 | 0.806 | 0.443 | 1.27E-66    | 1.82E+00    | endotheliocyte | CIRBP        |
| PFDN4        | 0           | 0.666655179 | 0.861 | 0.316 | 0           | 2.724683544 | spermatocyte   | PFDN4        |
| PGK2         | 0           | 0.666579963 | 0.818 | 0.56  | 0           | 1.460714286 | spermatid      | PGK2         |
| AKAP14       | 0           | 0.666424323 | 0.551 | 0.258 | 0           | 2.135658915 | spermatid      | AKAP14       |
| ATF41        | 1.58E-10    | 0.666415278 | 0.448 | 0.358 | 9.70E-06    | 1.25E+00    | macrophages    | ATF4         |
| TIE1         | 0           | 0.666185528 | 0.367 | 0.01  | 0           | 36.7        | endotheliocyte | TIE1         |
| NFKBIA3      | 7.18E-293   | 0.666027048 | 0.607 | 0.194 | 4.41E-288   | 3.13E+00    | PTM_cells      | NFKBIA       |
| PRMT2        | 5.31E-05    | 0.666006667 | 0.342 | 0.146 | 1           | 2.342465753 | T_cells        | PRMT2        |
| KRBOX11      | 0           | 0.665607919 | 0.936 | 0.43  | 0           | 2.176744186 | spermatocyte   | KRBOX1       |
| VKORC1       | 2.57E-257   | 0.665504283 | 0.428 | 0.104 | 1.58E-252   | 4.12E+00    | Leydig_cells   | VKORC1       |
| PRIM1        | 0           | 0.665320245 | 0.359 | 0.043 | 0           | 8.348837209 | spermatogonia  | PRIM1        |
| DDR2         | 6.08E-181   | 0.66526613  | 0.316 | 0.08  | 3.73E-176   | 3.95E+00    | Leydig_cells   | DDR2         |
| RPL23A1      | 2.71E-136   | 0.665132175 | 0.867 | 0.732 | 1.66E-131   | 1.18E+00    | Leydig_cells   | RPL23A       |
| AZIN2        | 0           | 0.665035599 | 0.53  | 0.224 | 0           | 2.366071429 | spermatid      | AZIN2        |
| SHC1         | 7.24E-211   | 0.664983902 | 0.407 | 0.052 | 4.44E-206   | 7.83E+00    | endotheliocyte | SHC1         |
| RALGDS       | 8.61E-298   | 0.664939424 | 0.355 | 0.028 | 5.28E-293   | 1.27E+01    | endotheliocyte | RALGDS       |
| CKS1B        | 0           | 0.66488672  | 0.569 | 0.234 | 0           | 2.431623932 | spermatogonia  | CKS1B        |
| C17orf64     | 0           | 0.66479199  | 0.967 | 0.515 | 0           | 1.877669903 | spermatocyte   | C17orf64     |
| FGFR1        | 7.61E-86    | 0.664627582 | 0.449 | 0.131 | 4.67E-81    | 3.43E+00    | endotheliocyte | FGFR1        |
| VAMP8        | 1.23E-13    | 0.664622582 | 0.323 | 0.201 | 7.54E-09    | 1.61E+00    | macrophages    | VAMP8        |
| TWISTNB      | 6.81E-07    | 0.664492194 | 0.215 | 0.135 | 0.041803303 | 1.592592593 | macrophages    | TWISTNB      |
| THRAP3       | 0           | 0.664309768 | 0.606 | 0.226 | 0           | 2.681415929 | spermatogonia  | THRAP3       |
| SPATA32      | 0           | 0.664191894 | 0.46  | 0.096 | 0           | 4.791666667 | spermatid      | SPATA32      |
| SAMSN1       | 1.22E-133   | 0.664181979 | 0.211 | 0.002 | 7.49E-129   | 1.06E+02    | T_cells        | SAMSN1       |
| GCC2         | 0           | 0.664008981 | 0.576 | 0.34  | 0           | 1.694117647 | spermatogonia  | GCC2         |
| CNN3         | 4.55E-50    | 0.664001523 | 0.63  | 0.361 | 2.79E-45    | 1.75E+00    | endotheliocyte | CNN3         |
| RAB21        | 0           | 0.663758216 | 0.581 | 0.334 | 0           | 1.739520958 | spermatid      | RAB21        |
| PGAM11       | 5.58E-67    | 0.663700837 | 0.373 | 0.235 | 3.42E-62    | 1.59E+00    | Sertoli_cells  | PGAM1        |
| LINC01210    | 0           | 0.663585412 | 0.734 | 0.122 | 0           | 6.016393443 | spermatocyte   | LINC01210    |
| RILPL2       | 4.71E-188   | 0.663528063 | 0.444 | 0.069 | 2.89E-183   | 6.43E+00    | endotheliocyte | RILPL2       |
| COL14A1      | 1.49E-236   | 0.663376549 | 0.355 | 0.041 | 9.16E-232   | 8.66E+00    | VSM_cells      | COL14A1      |
| CHST1        | 0           | 0.663163489 | 0.748 | 0.133 | 0           | 5.62406015  | spermatocyte   | CHST1        |
| BRCA2        | 0           | 0.663100143 | 0.435 | 0.101 | 0           | 4.306930693 | spermatogonia  | BRCA2        |
| SNRPE        | 0           | 0.662874194 | 0.578 | 0.263 | 0           | 2.197718631 | spermatogonia  | SNRPE        |
| THBD1        | 8.46E-25    | 0.662841407 | 0.175 | 0.049 | 5.19E-20    | 3.57E+00    | macrophages    | THBD         |
| ZFP36L24     | 1.56E-116   | 0.66264163  | 0.52  | 0.142 | 9.57E-112   | 3.66E+00    | VSM_cells      | ZFP36L2      |
| SLIRP        | 0           | 0.66260772  | 0.884 | 0.415 | 0           | 2.130120482 | spermatocyte   | SLIRP        |
| CTSK1        | 0           | 0.662542126 | 0.449 | 0.039 | 0           | 11.51282051 | PTM_cells      | CTSK         |
| HVCN1        | 0           | 0.662381716 | 0.84  | 0.303 | 0           | 2.772277228 | spermatocyte   | HVCN1        |
| RPL302       | 3.08E-177   | 0.662315424 | 0.937 | 0.876 | 1.89E-172   | 1.07E+00    | Leydig_cells   | RPL30        |
| BCL2L14      | 0           | 0.662173139 | 0.642 | 0.283 | 0           | 2.268551237 | spermatid      | BCL2L14      |
| FKBP9        | 4.12E-230   | 0.662149691 | 0.365 | 0.038 | 2.53E-225   | 9.61E+00    | endotheliocyte | FKBP9        |
| EGR11        | 4.96E-27    | 0.662074688 | 0.508 | 0.261 | 3.04E-22    | 1.95E+00    | macrophages    | EGR1         |

|              |             |             |       |       |             |             |                |              |
|--------------|-------------|-------------|-------|-------|-------------|-------------|----------------|--------------|
| PRSS54       | 0           | 0.662040548 | 0.595 | 0.302 | 0           | 1.970198675 | spermatid      | PRSS54       |
| LSM4         | 0           | 0.661968565 | 0.716 | 0.567 | 0           | 1.262786596 | spermatogonia  | LSM4         |
| ACTG1        | 0           | 0.661950311 | 0.891 | 0.768 | 0           | 1.16015625  | spermatogonia  | ACTG1        |
| PEBP1        | 1.34E-192   | 0.66192638  | 0.84  | 0.594 | 8.20E-188   | 1.41E+00    | PTM_cells      | PEBP1        |
| RAD23B       | 0           | 0.661911055 | 0.679 | 0.443 | 0           | 1.532731377 | spermatid      | RAD23B       |
| RP5.1056L3.3 | 1.96E-09    | 0.661838705 | 0.296 | 0.195 | 0.000120437 | 1.517948718 | macrophages    | RP5.1056L3.3 |
| C6orf201     | 0           | 0.66170905  | 0.68  | 0.398 | 0           | 1.708542714 | spermatid      | C6orf201     |
| MYO9B        | 3.85E-140   | 0.661693828 | 0.283 | 0.102 | 2.36E-135   | 2.77E+00    | Sertoli_cells  | MYO9B        |
| RPS132       | 8.61E-208   | 0.661681322 | 0.906 | 0.838 | 5.28E-203   | 1.08E+00    | PTM_cells      | RPS13        |
| RAB11FIP5    | 0           | 0.661547866 | 0.888 | 0.399 | 0           | 2.22556391  | spermatocyte   | RAB11FIP5    |
| PPP1R15B1    | 1.86E-23    | 0.66139744  | 0.323 | 0.148 | 1.14E-18    | 2.18E+00    | macrophages    | PPP1R15B     |
| RNF20        | 0           | 0.661172204 | 0.77  | 0.175 | 0           | 4.4         | spermatocyte   | RNF20        |
| ARHGAP15     | 0           | 0.661118635 | 0.741 | 0.163 | 0           | 4.54601227  | spermatocyte   | ARHGAP15     |
| CISD1        | 0           | 0.661105143 | 0.818 | 0.33  | 0           | 2.478787879 | spermatocyte   | CISD1        |
| PRDX11       | 5.93E-177   | 0.660777635 | 0.673 | 0.306 | 3.64E-172   | 2.20E+00    | Leydig_cells   | PRDX1        |
| PRPS22       | 3.70E-196   | 0.660684061 | 0.301 | 0.083 | 2.27E-191   | 3.63E+00    | Sertoli_cells  | PRPS2        |
| KLF43        | 5.09E-95    | 0.660577637 | 0.648 | 0.48  | 3.13E-90    | 1.35E+00    | PTM_cells      | KLF4         |
| LRRFIP12     | 1.56E-152   | 0.660558587 | 0.431 | 0.087 | 9.59E-148   | 4.95E+00    | VSM_cells      | LRRFIP1      |
| POLR2A       | 0           | 0.660477575 | 0.618 | 0.304 | 0           | 2.032894737 | spermatogonia  | POLR2A       |
| RPS161       | 1.71E-36    | 0.660267746 | 0.862 | 0.756 | 1.05E-31    | 1.14E+00    | macrophages    | RPS16        |
| MT-ATP6      | 1.29E-134   | 0.660186722 | 0.518 | 0.412 | 7.93E-130   | 1.26E+00    | spermatogonia  | MT-ATP6      |
| CCDC136      | 0           | 0.660152608 | 0.992 | 0.618 | 0           | 1.605177994 | spermatocyte   | CCDC136      |
| BASP1        | 1.90E-81    | 0.660072372 | 0.199 | 0.024 | 1.17E-76    | 8.29E+00    | macrophages    | BASP1        |
| PDCD42       | 1.06E-179   | 0.65984493  | 0.576 | 0.273 | 6.48E-175   | 2.11E+00    | PTM_cells      | PDCD4        |
| NSA2         | 0           | 0.659676932 | 0.942 | 0.464 | 0           | 2.030172414 | spermatocyte   | NSA2         |
| IGFBP31      | 0           | 0.659663703 | 0.196 | 0.014 | 0           | 14          | Leydig_cells   | IGFBP3       |
| RPS4Y13      | 2.22E-97    | 0.65948865  | 0.689 | 0.267 | 1.36E-92    | 2.58E+00    | VSM_cells      | RPS4Y1       |
| NFKBID       | 1.85E-251   | 0.659411641 | 0.232 | 0.01  | 1.14E-246   | 2.32E+01    | macrophages    | NFKBID       |
| ID31         | 0           | 0.659127171 | 0.287 | 0.037 | 0           | 7.756756757 | Leydig_cells   | ID3          |
| PIAS2        | 0           | 0.659125819 | 0.978 | 0.556 | 0           | 1.758992806 | spermatocyte   | PIAS2        |
| CTSC         | 5.98E-69    | 0.65900203  | 0.273 | 0.05  | 3.67E-64    | 5.46E+00    | macrophages    | CTSC         |
| CCT4         | 0           | 0.658931979 | 0.947 | 0.489 | 0           | 1.936605317 | spermatocyte   | CCT4         |
| RPL7A1       | 3.26E-192   | 0.658786148 | 0.934 | 0.876 | 2.00E-187   | 1.07E+00    | PTM_cells      | RPL7A        |
| ENOX1        | 0           | 0.65866515  | 0.539 | 0.201 | 0           | 2.68159204  | spermatid      | ENOX1        |
| SPAM1        | 0           | 0.658554576 | 0.46  | 0.166 | 0           | 2.771084337 | spermatid      | SPAM1        |
| WNK3         | 8.72E-142   | 0.658542278 | 0.262 | 0.087 | 5.35E-137   | 3.01E+00    | Sertoli_cells  | WNK3         |
| CDKN1A5      | 0.000268917 | 0.658525702 | 0.316 | 0.131 | 1           | 2.41221374  | T_cells        | CDKN1A       |
| CTSS1        | 5.17E-10    | 0.658432829 | 0.184 | 0.026 | 3.17E-05    | 7.08E+00    | T_cells        | CTSS         |
| CD631        | 7.02E-45    | 0.65836471  | 0.633 | 0.289 | 4.31E-40    | 2.19E+00    | macrophages    | CD63         |
| PDGFRB       | 1.67E-222   | 0.658303836 | 0.335 | 0.074 | 1.02E-217   | 4.53E+00    | Leydig_cells   | PDGFRB       |
| TSKU         | 0           | 0.658231717 | 0.255 | 0.022 | 0           | 11.59090909 | Leydig_cells   | TSKU         |
| GLT8D1       | 0           | 0.657932104 | 0.83  | 0.282 | 0           | 2.943262411 | spermatocyte   | GLT8D1       |
| RPS53        | 2.56E-79    | 0.657761831 | 0.886 | 0.817 | 1.57E-74    | 1.08E+00    | VSM_cells      | RPS5         |
| PSPC1        | 0           | 0.657524114 | 0.545 | 0.217 | 0           | 2.511520737 | spermatogonia  | PSPC1        |
| USP53        | 9.69E-20    | 0.657487918 | 0.246 | 0.103 | 5.94E-15    | 2.39E+00    | macrophages    | USP53        |
| RPS3AP47     | 5.58E-07    | 0.657272127 | 0.347 | 0.275 | 0.034244837 | 1.261818182 | macrophages    | RPS3AP47     |
| ZFAND5       | 1.57E-45    | 0.657184263 | 0.702 | 0.483 | 9.62E-41    | 1.45E+00    | endotheliocyte | ZFAND5       |
| MT1A1        | 4.94E-235   | 0.657086572 | 0.326 | 0.034 | 3.03E-230   | 9.59E+00    | VSM_cells      | MT1A         |
| BRD8         | 0           | 0.657071392 | 0.919 | 0.361 | 0           | 2.545706371 | spermatocyte   | BRD8         |
| IL61         | 5.97E-158   | 0.657027076 | 0.124 | 0.014 | 3.66E-153   | 8.86E+00    | Leydig_cells   | IL6          |
| NGFRAP1      | 4.12E-244   | 0.656967554 | 0.475 | 0.125 | 2.53E-239   | 3.80E+00    | Leydig_cells   | NGFRAP1      |
| CAPN2        | 2.27E-80    | 0.656864785 | 0.568 | 0.206 | 1.39E-75    | 2.76E+00    | endotheliocyte | CAPN2        |
| MRPL14       | 0           | 0.656804588 | 0.852 | 0.383 | 0           | 2.224543081 | spermatocyte   | MRPL14       |
| ANXA71       | 2.44E-300   | 0.656788598 | 0.502 | 0.143 | 1.50E-295   | 3.51E+00    | PTM_cells      | ANXA7        |
| TFPI         | 4.30E-74    | 0.656784214 | 0.377 | 0.107 | 2.64E-69    | 3.52E+00    | endotheliocyte | TFPI         |
| PDIA4        | 0           | 0.656743426 | 0.487 | 0.083 | 0           | 5.86746988  | spermatogonia  | PDIA4        |
| RPL293       | 5.80E-89    | 0.656556053 | 0.909 | 0.847 | 3.56E-84    | 1.07E+00    | VSM_cells      | RPL29        |
| RPS142       | 9.70E-157   | 0.656533114 | 0.908 | 0.828 | 5.95E-152   | 1.10E+00    | Leydig_cells   | RPS14        |
| TIAM2        | 0           | 0.656482549 | 0.483 | 0.154 | 0           | 3.136363636 | spermatid      | TIAM2        |
| RPL111       | 2.39E-35    | 0.65646857  | 0.909 | 0.825 | 1.47E-30    | 1.10E+00    | macrophages    | RPL11        |
| TUBB4B       | 0           | 0.656198089 | 0.997 | 0.842 | 0           | 1.184085511 | spermatocyte   | TUBB4B       |
| EEF1D2       | 2.67E-165   | 0.655915196 | 0.798 | 0.621 | 1.64E-160   | 1.29E+00    | PTM_cells      | EEF1D        |
| ATP1B11      | 0           | 0.655675369 | 0.527 | 0.132 | 0           | 3.992424242 | PTM_cells      | ATP1B1       |
| SCD          | 3.55E-98    | 0.655570043 | 0.279 | 0.122 | 2.18E-93    | 2.29E+00    | Sertoli_cells  | SCD          |
| FAM49B       | 1.01E-29    | 0.655484529 | 0.364 | 0.155 | 6.20E-25    | 2.35E+00    | macrophages    | FAM49B       |
| HNRNPA14     | 1.19E-55    | 0.655424742 | 0.761 | 0.603 | 7.32E-51    | 1.26E+00    | VSM_cells      | HNRNPA1      |
| CCDC112      | 0           | 0.655420007 | 0.509 | 0.219 | 0           | 2.324200913 | spermatogonia  | CCDC112      |
| FAM71F2      | 0           | 0.655360861 | 0.484 | 0.108 | 0           | 4.481481481 | spermatid      | FAM71F2      |
| TCP10L       | 0           | 0.655025754 | 0.982 | 0.565 | 0           | 1.738053097 | spermatocyte   | TCP10L       |
| MUM1L1       | 0           | 0.655020372 | 0.239 | 0.034 | 0           | 7.029411765 | Sertoli_cells  | MUM1L1       |
| GPRC5B       | 6.91E-83    | 0.654918097 | 0.305 | 0.157 | 4.24E-78    | 1.94E+00    | Sertoli_cells  | GPRC5B       |
| EREG         | 1.74E-41    | 0.654862566 | 0.094 | 0.011 | 1.07E-36    | 8.55E+00    | macrophages    | EREG         |
| COX5A        | 0           | 0.654848257 | 0.966 | 0.619 | 0           | 1.560581583 | spermatocyte   | COX5A        |
| FLT1         | 4.04E-43    | 0.654824956 | 0.563 | 0.328 | 2.48E-38    | 1.72E+00    | endotheliocyte | FLT1         |
| ITGA5        | 0           | 0.654578655 | 0.347 | 0.009 | 0           | 38.55555556 | endotheliocyte | ITGA5        |



|            |             |             |       |       |             |             |                |            |
|------------|-------------|-------------|-------|-------|-------------|-------------|----------------|------------|
| MT-ND1     | 3.90E-140   | 0.654483206 | 0.497 | 0.387 | 2.40E-135   | 1.28E+00    | spermatogonia  | MT-ND1     |
| C12orf57   | 2.19E-88    | 0.654306507 | 0.607 | 0.453 | 1.34E-83    | 1.34E+00    | Leydig_cells   | C12orf57   |
| GBP5       | 5.89E-27    | 0.654264488 | 0.184 | 0.01  | 3.61E-22    | 1.84E+01    | T_cells        | GBP5       |
| CEBPB      | 5.34E-56    | 0.654191396 | 0.293 | 0.068 | 3.28E-51    | 4.31E+00    | macrophages    | CEBPB      |
| ZNF638     | 0           | 0.65412863  | 0.583 | 0.24  | 0           | 2.429166667 | spermatogonia  | ZNF638     |
| DKC1       | 1.14E-137   | 0.654123849 | 0.302 | 0.109 | 6.97E-133   | 2.77E+00    | Sertoli_cells  | DKC1       |
| EDIL3      | 1.31E-162   | 0.654113453 | 0.406 | 0.078 | 8.04E-158   | 5.21E+00    | VSM_cells      | EDIL3      |
| CDC20      | 0           | 0.654026195 | 0.831 | 0.229 | 0           | 3.628820961 | spermatocyte   | CDC20      |
| TF         | 0           | 0.653829773 | 0.234 | 0.015 | 0           | 15.6        | Sertoli_cells  | TF         |
| CPE3       | 8.32E-87    | 0.65375811  | 0.375 | 0.203 | 5.10E-82    | 1.85E+00    | Sertoli_cells  | CPE        |
| RPL10A1    | 3.15E-31    | 0.653594111 | 0.768 | 0.662 | 1.93E-26    | 1.16E+00    | macrophages    | RPL10A     |
| PGM5       | 3.33E-167   | 0.653228281 | 0.285 | 0.032 | 2.04E-162   | 8.91E+00    | endotheliocyte | PGM5       |
| PARP15     | 3.18E-22    | 0.652971894 | 0.132 | 0.006 | 1.95E-17    | 2.20E+01    | T_cells        | PARP15     |
| STK39      | 0           | 0.652869421 | 0.739 | 0.26  | 0           | 2.842307692 | spermatocyte   | STK39      |
| RPL18AP3   | 7.49E-33    | 0.652804572 | 0.189 | 0.046 | 4.60E-28    | 4.11E+00    | macrophages    | RPL18AP3   |
| POMP       | 0           | 0.652712854 | 0.976 | 0.687 | 0           | 1.420669578 | spermatocyte   | POMP       |
| HABP4      | 0           | 0.65271019  | 0.608 | 0.4   | 0           | 1.52        | spermatid      | HABP4      |
| EDNRA2     | 1.68E-253   | 0.652629065 | 0.389 | 0.045 | 1.03E-248   | 8.64E+00    | VSM_cells      | EDNRA      |
| LIMA1      | 2.53E-47    | 0.652463696 | 0.474 | 0.223 | 1.55E-42    | 2.13E+00    | endotheliocyte | LIMA1      |
| ARHGAP35   | 2.46E-299   | 0.652436973 | 0.668 | 0.503 | 1.51E-294   | 1.33E+00    | spermatid      | ARHGAP35   |
| LINC00226  | 0           | 0.652416634 | 0.52  | 0.259 | 0           | 2.007722008 | spermatid      | LINC00226  |
| CDC42      | 0           | 0.652382013 | 0.683 | 0.344 | 0           | 1.985465116 | spermatogonia  | CDC42      |
| TRIB2      | 1.83E-267   | 0.652111072 | 0.311 | 0.054 | 1.12E-262   | 5.76E+00    | Leydig_cells   | TRIB2      |
| PAPOLB     | 0           | 0.652062267 | 0.878 | 0.259 | 0           | 3.38996139  | spermatocyte   | PAPOLB     |
| CEP85      | 0           | 0.651444154 | 0.463 | 0.094 | 0           | 4.925531915 | spermatogonia  | CEP85      |
| RGS191     | 1.32E-35    | 0.651381563 | 0.237 | 0.012 | 8.08E-31    | 1.98E+01    | T_cells        | RGS19      |
| LINC01096  | 0           | 0.651301559 | 0.808 | 0.174 | 0           | 4.643678161 | spermatocyte   | LINC01096  |
| CRYAB      | 0           | 0.651226562 | 0.44  | 0.109 | 0           | 4.036697248 | PTM_cells      | CRYAB      |
| FNDC4      | 0           | 0.651186426 | 0.526 | 0.191 | 0           | 2.753926702 | spermatid      | FNDC4      |
| BTG12      | 2.02E-87    | 0.651146808 | 0.717 | 0.606 | 1.24E-82    | 1.18E+00    | Leydig_cells   | BTG1       |
| RPS145     | 1.70E-132   | 0.651079178 | 0.865 | 0.829 | 1.04E-127   | 1.04E+00    | Sertoli_cells  | RPS14      |
| RPS195     | 8.39E-89    | 0.651046498 | 0.907 | 0.757 | 5.15E-84    | 1.20E+00    | VSM_cells      | RPS19      |
| SOX7       | 0           | 0.650889058 | 0.352 | 0.008 | 0           | 44          | endotheliocyte | SOX7       |
| SF3B1      | 0           | 0.650878736 | 0.638 | 0.277 | 0           | 2.303249097 | spermatogonia  | SF3B1      |
| IRF11      | 1.83E-19    | 0.650820293 | 0.407 | 0.222 | 1.12E-14    | 1.83E+00    | macrophages    | IRF1       |
| ZC3HAV1    | 1.16E-07    | 0.650779082 | 0.342 | 0.104 | 0.007138885 | 3.288461538 | T_cells        | ZC3HAV1    |
| BPTF       | 0           | 0.650758874 | 0.614 | 0.327 | 0           | 1.877675841 | spermatogonia  | BPTF       |
| LCP21      | 1.61E-37    | 0.650645265 | 0.237 | 0.012 | 9.89E-33    | 1.98E+01    | T_cells        | LCP2       |
| LINC01539  | 0           | 0.650628817 | 0.573 | 0.221 | 0           | 2.592760181 | spermatid      | LINC01539  |
| ATP2B1     | 0           | 0.65044189  | 0.346 | 0.076 | 0           | 4.552631579 | spermatogonia  | ATP2B1     |
| IDS        | 8.95E-39    | 0.650437067 | 0.256 | 0.069 | 5.49E-34    | 3.71E+00    | macrophages    | IDS        |
| IL1R1      | 1.03E-257   | 0.650408958 | 0.342 | 0.03  | 6.30E-253   | 1.14E+01    | endotheliocyte | IL1R1      |
| SOX5       | 0           | 0.650354105 | 0.893 | 0.297 | 0           | 3.006734007 | spermatocyte   | SOX5       |
| TSEN34     | 3.68E-56    | 0.650345335 | 0.296 | 0.173 | 2.26E-51    | 1.71E+00    | Sertoli_cells  | TSEN34     |
| HTATSF1    | 2.53E-115   | 0.650330551 | 0.321 | 0.138 | 1.55E-110   | 2.33E+00    | Sertoli_cells  | HTATSF1    |
| CD831      | 2.46E-237   | 0.650312078 | 0.264 | 0.058 | 1.51E-232   | 4.55E+00    | Sertoli_cells  | CD83       |
| TTC39A     | 0           | 0.650284955 | 0.657 | 0.389 | 0           | 1.688946015 | spermatid      | TTC39A     |
| ADCY4      | 0           | 0.650094012 | 0.34  | 0.006 | 0           | 56.66666667 | endotheliocyte | ADCY4      |
| DNAAF1     | 0           | 0.649998406 | 0.912 | 0.316 | 0           | 2.886075949 | spermatocyte   | DNAAF1     |
| SPN        | 4.24E-153   | 0.64990368  | 0.211 | 0.002 | 2.60E-148   | 1.06E+02    | T_cells        | SPN        |
| SLC2A14    | 7.17E-109   | 0.649850554 | 0.321 | 0.217 | 4.40E-104   | 1.48E+00    | spermatogonia  | SLC2A14    |
| JUND3      | 2.46E-100   | 0.649767813 | 0.678 | 0.495 | 1.51E-95    | 1.37E+00    | PTM_cells      | JUND       |
| LSM14B     | 0           | 0.649680371 | 0.555 | 0.244 | 0           | 2.274590164 | spermatid      | LSM14B     |
| SWI5       | 0           | 0.64965938  | 0.693 | 0.48  | 0           | 1.44375     | spermatid      | SWI5       |
| CDR2       | 0           | 0.649481044 | 0.777 | 0.235 | 0           | 3.306382979 | spermatocyte   | CDR2       |
| KLF101     | 9.12E-12    | 0.649344652 | 0.364 | 0.245 | 5.59E-07    | 1.49E+00    | macrophages    | KLF10      |
| HSPA1B3    | 7.90E-228   | 0.649186813 | 0.523 | 0.179 | 4.84E-223   | 2.92E+00    | PTM_cells      | HSPA1B     |
| EIF4G1     | 0           | 0.649174307 | 0.573 | 0.297 | 0           | 1.929292929 | spermatid      | EIF4G1     |
| FTH16      | 8.85E-05    | 0.649063736 | 0.816 | 0.723 | 1           | 1.128630705 | T_cells        | FTH1       |
| INSIG1     | 0.000290847 | 0.649010489 | 0.286 | 0.245 | 1           | 1.167346939 | macrophages    | INSIG1     |
| ITM2B5     | 4.39E-09    | 0.648976112 | 0.737 | 0.327 | 0.000269332 | 2.25382263  | T_cells        | ITM2B      |
| C14orf1    | 0           | 0.648898312 | 0.92  | 0.367 | 0           | 2.506811989 | spermatocyte   | C14orf1    |
| ZNF706     | 0           | 0.648892006 | 0.632 | 0.468 | 0           | 1.35042735  | spermatid      | ZNF706     |
| RPL36A4    | 5.42E-129   | 0.64878212  | 0.522 | 0.134 | 3.33E-124   | 3.90E+00    | VSM_cells      | RPL36A     |
| WDR1       | 0           | 0.648770322 | 0.691 | 0.542 | 0           | 1.274907749 | spermatid      | WDR1       |
| UBL5       | 0           | 0.648754146 | 0.751 | 0.531 | 0           | 1.414312618 | spermatogonia  | UBL5       |
| ELN2       | 3.05E-191   | 0.648558846 | 0.338 | 0.045 | 1.87E-186   | 7.51E+00    | VSM_cells      | ELN        |
| RPL61      | 2.80E-19    | 0.648308308 | 0.714 | 0.684 | 1.72E-14    | 1.04E+00    | macrophages    | RPL6       |
| EIF3K1     | 1.35E-59    | 0.648263776 | 0.689 | 0.482 | 8.26E-55    | 1.43E+00    | VSM_cells      | EIF3K      |
| DOK2       | 0           | 0.648235009 | 0.226 | 0.007 | 0           | 32.28571429 | macrophages    | DOK2       |
| GABRG3.AS1 | 0           | 0.648219056 | 0.279 | 0.059 | 0           | 4.728813559 | spermatid      | GABRG3.AS1 |
| AIFM1      | 8.45E-246   | 0.647990335 | 0.257 | 0.053 | 5.18E-241   | 4.85E+00    | Sertoli_cells  | AIFM1      |
| RAC2       | 0           | 0.64795491  | 0.182 | 0.003 | 0           | 60.66666667 | macrophages    | RAC2       |
| TMC6       | 1.58E-27    | 0.647566615 | 0.211 | 0.013 | 9.72E-23    | 1.62E+01    | T_cells        | TMC6       |
| TUBA3E     | 0           | 0.647485399 | 0.805 | 0.311 | 0           | 2.588424437 | spermatocyte   | TUBA3E     |

|             |             |             |       |       |             |             |                |             |
|-------------|-------------|-------------|-------|-------|-------------|-------------|----------------|-------------|
| ARHGAP30    | 0           | 0.647374863 | 0.192 | 0.004 | 0           | 48          | macrophages    | ARHGAP30    |
| RP11-80B9.4 | 2.10E-304   | 0.64691589  | 0.341 | 0.164 | 1.29E-299   | 2.08E+00    | spermatid      | RP11-80B9.4 |
| NDUFS51     | 1.25E-61    | 0.646879444 | 0.679 | 0.446 | 7.68E-57    | 1.52E+00    | VSM_cells      | NDUFS5      |
| APOC1       | 0           | 0.646857909 | 0.29  | 0.027 | 0           | 10.74074074 | Leydig_cells   | APOC1       |
| CPSF3       | 0           | 0.64625468  | 0.91  | 0.341 | 0           | 2.668621701 | spermatocyte   | CPSF3       |
| EMB         | 8.54E-143   | 0.646179001 | 0.229 | 0.019 | 5.24E-138   | 1.21E+01    | macrophages    | EMB         |
| C16orf86    | 0           | 0.646084842 | 0.783 | 0.199 | 0           | 3.934673367 | spermatocyte   | C16orf86    |
| CCDC169     | 0           | 0.646079521 | 0.729 | 0.567 | 0           | 1.285714286 | spermatid      | CCDC169     |
| ATP1B12     | 1.63E-104   | 0.645716351 | 0.311 | 0.141 | 1.00E-99    | 2.21E+00    | Sertoli_cells  | ATP1B1      |
| TNFAIP2     | 1.24E-15    | 0.645671984 | 0.343 | 0.192 | 7.61E-11    | 1.79E+00    | macrophages    | TNFAIP2     |
| SH3BP5      | 1.83E-190   | 0.645374796 | 0.602 | 0.273 | 1.13E-185   | 2.21E+00    | PTM_cells      | SH3BP5      |
| RPS131      | 1.06E-158   | 0.645258048 | 0.917 | 0.838 | 6.49E-154   | 1.09E+00    | Leydig_cells   | RPS13       |
| HSD17B12    | 3.95E-65    | 0.645035371 | 0.471 | 0.183 | 2.42E-60    | 2.57E+00    | endotheliocyte | HSD17B12    |
| BAZ1B       | 0           | 0.645007788 | 0.487 | 0.144 | 0           | 3.381944444 | spermatogonia  | BAZ1B       |
| KRT19       | 0           | 0.644874364 | 0.26  | 0.011 | 0           | 23.63636364 | PTM_cells      | KRT19       |
| MZT2A       | 1.37E-169   | 0.644858328 | 0.566 | 0.271 | 8.43E-165   | 2.09E+00    | PTM_cells      | MZT2A       |
| HLTF1       | 3.06E-67    | 0.644828646 | 0.367 | 0.222 | 1.88E-62    | 1.65E+00    | Sertoli_cells  | HLTF        |
| ATAD2       | 0           | 0.64480168  | 0.56  | 0.263 | 0           | 2.129277567 | spermatogonia  | ATAD2       |
| TDRD9       | 0           | 0.644744809 | 0.509 | 0.169 | 0           | 3.01183432  | spermatogonia  | TDRD9       |
| BLVRB       | 0           | 0.644687038 | 0.36  | 0.056 | 0           | 6.428571429 | Leydig_cells   | BLVRB       |
| ORC6        | 0           | 0.64466143  | 0.464 | 0.118 | 0           | 3.93220339  | spermatogonia  | ORC6        |
| IL6ST1      | 4.73E-75    | 0.644228504 | 0.455 | 0.268 | 2.90E-70    | 1.70E+00    | Leydig_cells   | IL6ST       |
| FZD2        | 0           | 0.644134802 | 0.193 | 0.015 | 0           | 12.86666667 | Leydig_cells   | FZD2        |
| RAB11FIP11  | 1.74E-08    | 0.644110092 | 0.211 | 0.039 | 0.001064977 | 5.41025641  | T_cells        | RAB11FIP1   |
| SAP18       | 0           | 0.643988622 | 0.978 | 0.685 | 0           | 1.427737226 | spermatocyte   | SAP18       |
| ARPC5       | 0           | 0.643901979 | 0.602 | 0.282 | 0           | 2.134751773 | spermatogonia  | ARPC5       |
| MARK4       | 0           | 0.643886311 | 0.245 | 0.034 | 0           | 7.205882353 | Sertoli_cells  | MARK4       |
| ACTN1       | 4.11E-61    | 0.643756665 | 0.541 | 0.247 | 2.52E-56    | 2.19E+00    | endotheliocyte | ACTN1       |
| ACTN42      | 0.001957822 | 0.643714375 | 0.316 | 0.164 | 1           | 1.926829268 | T_cells        | ACTN4       |
| PLEC        | 8.69E-168   | 0.643589304 | 0.387 | 0.057 | 5.33E-163   | 6.79E+00    | endotheliocyte | PLEC        |
| G3BP1       | 0           | 0.643299107 | 0.594 | 0.327 | 0           | 1.816513761 | spermatogonia  | G3BP1       |
| MRFAP1      | 0           | 0.643264327 | 0.714 | 0.418 | 0           | 1.708133971 | spermatogonia  | MRFAP1      |
| PDE6D       | 0           | 0.643240247 | 0.898 | 0.376 | 0           | 2.388297872 | spermatocyte   | PDE6D       |
| XYLT2       | 0           | 0.643155743 | 0.524 | 0.234 | 0           | 2.239316239 | spermatid      | XYLT2       |
| SH3BGRL1    | 3.80E-39    | 0.643076487 | 0.343 | 0.11  | 2.33E-34    | 3.12E+00    | macrophages    | SH3BGRL     |
| FEZ21       | 2.41E-135   | 0.642851505 | 0.264 | 0.09  | 1.48E-130   | 2.93E+00    | Sertoli_cells  | FEZ2        |
| SYTL1       | 6.83E-07    | 0.642701049 | 0.184 | 0.037 | 0.041908029 | 4.972972973 | T_cells        | SYTL1       |
| HSPA1B4     | 2.58E-57    | 0.642616927 | 0.461 | 0.191 | 1.58E-52    | 2.41E+00    | VSM_cells      | HSPA1B      |
| TNS2        | 3.54E-262   | 0.642615962 | 0.417 | 0.043 | 2.17E-257   | 9.70E+00    | endotheliocyte | TNS2        |
| SIVA1       | 0           | 0.642610291 | 0.729 | 0.476 | 0           | 1.531512605 | spermatogonia  | SIVA1       |
| TMEM97      | 2.03E-37    | 0.642394544 | 0.346 | 0.266 | 1.25E-32    | 1.30E+00    | Sertoli_cells  | TMEM97      |
| CCDC801     | 5.87E-67    | 0.642173177 | 0.528 | 0.35  | 3.60E-62    | 1.51E+00    | Leydig_cells   | CCDC80      |
| GAPDH1      | 9.27E-132   | 0.64189388  | 0.8   | 0.81  | 5.69E-127   | 9.88E-01    | Sertoli_cells  | GAPDH       |
| PRPH        | 0           | 0.641790009 | 0.921 | 0.366 | 0           | 2.516393443 | spermatocyte   | PRPH        |
| SFMBT1      | 0           | 0.641664576 | 0.811 | 0.263 | 0           | 3.08365019  | spermatocyte   | SFMBT1      |
| RAC15       | 7.05E-64    | 0.641662917 | 0.668 | 0.375 | 4.33E-59    | 1.78E+00    | VSM_cells      | RAC1        |
| DPT1        | 0           | 0.641487763 | 0.378 | 0.03  | 0           | 12.6        | PTM_cells      | DPT         |
| NUCB1       | 3.82E-103   | 0.641486894 | 0.491 | 0.134 | 2.34E-98    | 3.66E+00    | endotheliocyte | NUCB1       |
| REXO1       | 0           | 0.641348295 | 0.527 | 0.23  | 0           | 2.291304348 | spermatid      | REXO1       |
| ATP1A1      | 4.98E-48    | 0.641282705 | 0.541 | 0.283 | 3.05E-43    | 1.91E+00    | endotheliocyte | ATP1A1      |
| IQCE        | 0           | 0.641260109 | 0.656 | 0.451 | 0           | 1.454545455 | spermatid      | IQCE        |
| SOD31       | 1.54E-22    | 0.641024872 | 0.34  | 0.295 | 9.46E-18    | 1.15E+00    | Sertoli_cells  | SOD3        |
| IMPACT      | 0           | 0.640903207 | 0.525 | 0.161 | 0           | 3.260869565 | spermatogonia  | IMPACT      |
| RRBP1       | 0           | 0.64087432  | 0.543 | 0.261 | 0           | 2.08045977  | spermatogonia  | RRBP1       |
| IKZF11      | 3.68E-07    | 0.640844244 | 0.158 | 0.027 | 0.022570072 | 5.851851852 | T_cells        | IKZF1       |
| RPL141      | 1.50E-24    | 0.640781003 | 0.737 | 0.645 | 9.21E-20    | 1.14E+00    | macrophages    | RPL14       |
| OTUD6B-AS1  | 0           | 0.640736614 | 0.564 | 0.308 | 0           | 1.831168831 | spermatocyte   | OTUD6B-AS1  |
| BUB1B       | 0           | 0.640729674 | 0.443 | 0.102 | 0           | 4.343137255 | spermatogonia  | BUB1B       |
| SON         | 0           | 0.640675505 | 0.763 | 0.529 | 0           | 1.442344045 | spermatogonia  | SON         |
| KCNQ1OT1    | 6.17E-204   | 0.640472901 | 0.301 | 0.139 | 3.79E-199   | 2.17E+00    | spermatogonia  | KCNQ1OT1    |
| LRIF1       | 1.71E-45    | 0.640390215 | 0.292 | 0.185 | 1.05E-40    | 1.58E+00    | Sertoli_cells  | LRIF1       |
| ARF1        | 0           | 0.640340944 | 0.959 | 0.648 | 0           | 1.479938272 | spermatocyte   | ARF1        |
| HSPH1       | 0           | 0.640327739 | 0.744 | 0.53  | 0           | 1.403773585 | spermatogonia  | HSPH1       |
| RCC1        | 0           | 0.640271742 | 0.504 | 0.223 | 0           | 2.260089686 | spermatid      | RCC1        |
| CTCFL       | 0           | 0.640171397 | 0.282 | 0.022 | 0           | 12.81818182 | spermatogonia  | CTCFL       |
| ZEB21       | 2.78E-296   | 0.640154749 | 0.37  | 0.069 | 1.70E-291   | 5.36E+00    | Leydig_cells   | ZEB2        |
| PIK3R11     | 2.32E-204   | 0.640105739 | 0.348 | 0.087 | 1.42E-199   | 4.00E+00    | Leydig_cells   | PIK3R1      |
| KRT23       | 0           | 0.639968222 | 0.78  | 0.192 | 0           | 4.0625      | spermatocyte   | KRT23       |
| NDRG21      | 2.25E-161   | 0.639824059 | 0.412 | 0.075 | 1.38E-156   | 5.49E+00    | VSM_cells      | NDRG2       |
| GPBP1       | 0           | 0.639814043 | 0.776 | 0.573 | 0           | 1.354275742 | spermatogonia  | GPBP1       |
| FBLN21      | 1.72E-240   | 0.639812822 | 0.343 | 0.076 | 1.05E-235   | 4.51E+00    | PTM_cells      | FBLN2       |
| S100A114    | 8.10E-59    | 0.639771618 | 0.636 | 0.349 | 4.97E-54    | 1.82E+00    | VSM_cells      | S100A11     |
| ZFAS13      | 4.29E-170   | 0.639464141 | 0.542 | 0.254 | 2.63E-165   | 2.13E+00    | PTM_cells      | ZFAS1       |
| GNPMB1      | 0           | 0.639112468 | 0.431 | 0.057 | 0           | 7.561403509 | PTM_cells      | GNPMB       |
| GTF3A       | 0           | 0.638950817 | 0.464 | 0.236 | 0           | 1.966101695 | spermatogonia  | GTF3A       |

|              |             |             |       |       |             |             |                |              |
|--------------|-------------|-------------|-------|-------|-------------|-------------|----------------|--------------|
| PDCD41       | 7.10E-89    | 0.638790509 | 0.487 | 0.279 | 4.35E-84    | 1.75E+00    | Leydig_cells   | PDCD4        |
| ATG3         | 0           | 0.638708351 | 0.953 | 0.512 | 0           | 1.861328125 | spermatocyte   | ATG3         |
| SOX4         | 0           | 0.638613559 | 0.303 | 0.093 | 0           | 3.258064516 | spermatogonia  | SOX4         |
| IFIT31       | 3.43E-303   | 0.638590832 | 0.222 | 0.023 | 2.10E-298   | 9.65E+00    | Leydig_cells   | IFIT3        |
| AC010649.1   | 0           | 0.638405231 | 0.433 | 0.114 | 0           | 3.798245614 | spermatid      | AC010649.1   |
| COX7B        | 1.79E-103   | 0.638139755 | 0.495 | 0.153 | 1.10E-98    | 3.24E+00    | VSM_cells      | COX7B        |
| CSMD2.AS1    | 0           | 0.638067054 | 0.289 | 0.071 | 0           | 4.070422535 | spermatid      | CSMD2.AS1    |
| FAM71D       | 0           | 0.637995454 | 0.513 | 0.201 | 0           | 2.552238806 | spermatid      | FAM71D       |
| MIEF1        | 0           | 0.637983285 | 0.59  | 0.329 | 0           | 1.79331307  | spermatid      | MIEF1        |
| PCBD1        | 2.76E-107   | 0.637949074 | 0.212 | 0.07  | 1.69E-102   | 3.03E+00    | Sertoli_cells  | PCBD1        |
| KANK3        | 0           | 0.637816301 | 0.385 | 0.014 | 0           | 27.5        | endotheliocyte | KANK3        |
| CEBPD3       | 0           | 0.637805899 | 0.438 | 0.097 | 0           | 4.515463918 | PTM_cells      | CEBPD        |
| APRT         | 2.61E-149   | 0.637775718 | 0.446 | 0.169 | 1.60E-144   | 2.64E+00    | Leydig_cells   | APRT         |
| INHBB        | 0           | 0.637772315 | 0.224 | 0.021 | 0           | 10.66666667 | Sertoli_cells  | INHBB        |
| SNHG5        | 3.51E-08    | 0.637759873 | 0.149 | 0.082 | 0.0021563   | 1.817073171 | endotheliocyte | SNHG5        |
| MT-ND41      | 8.07E-53    | 0.63765131  | 0.73  | 0.414 | 4.95E-48    | 1.76E+00    | endotheliocyte | MT-ND4       |
| RPL42        | 5.01E-148   | 0.637613294 | 0.828 | 0.747 | 3.07E-143   | 1.11E+00    | PTM_cells      | RPL4         |
| SVIL1        | 8.61E-101   | 0.637554633 | 0.423 | 0.118 | 5.28E-96    | 3.58E+00    | VSM_cells      | SVIL         |
| RPL13AP5     | 6.12E-08    | 0.637553479 | 0.171 | 0.102 | 0.003753355 | 1.676470588 | endotheliocyte | RPL13AP5     |
| AK3          | 2.13E-276   | 0.637550351 | 0.341 | 0.063 | 1.31E-271   | 5.41E+00    | Leydig_cells   | AK3          |
| MRPL42       | 0           | 0.637315396 | 0.872 | 0.405 | 0           | 2.15308642  | spermatocyte   | MRPL42       |
| PHLDA2       | 2.36E-257   | 0.637273147 | 0.245 | 0.017 | 1.45E-252   | 1.44E+01    | VSM_cells      | PHLDA2       |
| CBR3         | 0           | 0.637267312 | 0.311 | 0.02  | 0           | 15.55       | Leydig_cells   | CBR3         |
| EGFR1        | 0           | 0.63723761  | 0.434 | 0.049 | 0           | 8.857142857 | PTM_cells      | EGFR         |
| DGUOK        | 0           | 0.637224687 | 0.553 | 0.197 | 0           | 2.807106599 | spermatogonia  | DGUOK        |
| IFIT1        | 1.27E-290   | 0.63695417  | 0.355 | 0.028 | 7.80E-286   | 1.27E+01    | endotheliocyte | IFIT1        |
| CLTA         | 0           | 0.636937761 | 0.716 | 0.468 | 0           | 1.52991453  | spermatogonia  | CLTA         |
| SLC38A22     | 8.13E-107   | 0.636901625 | 0.429 | 0.112 | 4.99E-102   | 3.83E+00    | VSM_cells      | SLC38A2      |
| CXXC5        | 0           | 0.636855287 | 0.631 | 0.37  | 0           | 1.705405405 | spermatid      | CXXC5        |
| TBP          | 0           | 0.636666762 | 0.754 | 0.178 | 0           | 4.235955056 | spermatocyte   | TBP          |
| CPED1        | 0           | 0.636548811 | 0.384 | 0.022 | 0           | 17.45454545 | PTM_cells      | CPED1        |
| PPIB2        | 0.005634475 | 0.636497517 | 0.421 | 0.294 | 1           | 1.431972789 | T_cells        | PPIB         |
| CD82         | 1.93E-177   | 0.636314497 | 0.357 | 0.047 | 1.18E-172   | 7.60E+00    | endotheliocyte | CD82         |
| KLRG1        | 1.54E-19    | 0.636261431 | 0.158 | 0.01  | 9.46E-15    | 1.58E+01    | T_cells        | KLRG1        |
| RBPJ         | 0           | 0.636246479 | 0.633 | 0.331 | 0           | 1.912386707 | spermatogonia  | RBPJ         |
| NAA38        | 0           | 0.636194148 | 0.713 | 0.588 | 0           | 1.212585034 | spermatid      | NAA38        |
| ARHGEF1      | 9.48E-13    | 0.636043281 | 0.237 | 0.034 | 5.82E-08    | 6.97E+00    | T_cells        | ARHGEF1      |
| RPS111       | 3.84E-37    | 0.63596537  | 0.889 | 0.822 | 2.35E-32    | 1.08E+00    | macrophages    | RPS11        |
| SLF1         | 0           | 0.635841551 | 0.522 | 0.167 | 0           | 3.125748503 | spermatogonia  | SLF1         |
| MED4         | 0           | 0.635803682 | 0.636 | 0.39  | 0           | 1.630769231 | spermatogonia  | MED4         |
| RPS262       | 1.91E-68    | 0.635721003 | 0.648 | 0.533 | 1.17E-63    | 1.22E+00    | Leydig_cells   | RPS26        |
| NAA15        | 0           | 0.635579071 | 0.515 | 0.136 | 0           | 3.786764706 | spermatogonia  | NAA15        |
| CCND3        | 1.65E-142   | 0.635575178 | 0.414 | 0.077 | 1.02E-137   | 5.38E+00    | endotheliocyte | CCND3        |
| SERTAD12     | 1.18E-247   | 0.635574862 | 0.334 | 0.066 | 7.26E-243   | 5.06E+00    | Leydig_cells   | SERTAD1      |
| ATP5D1       | 0.003458305 | 0.635523896 | 0.332 | 0.387 | 1           | 0.857881137 | Sertoli_cells  | ATP5D        |
| ATP5G22      | 2.65E-61    | 0.635461711 | 0.729 | 0.491 | 1.62E-56    | 1.48E+00    | VSM_cells      | ATP5G2       |
| ATP2A2       | 0           | 0.635389941 | 0.574 | 0.318 | 0           | 1.805031447 | spermatogonia  | ATP2A2       |
| MAP3K7CL     | 0           | 0.635355827 | 0.281 | 0.012 | 0           | 23.41666667 | VSM_cells      | MAP3K7CL     |
| CLGN1        | 0.006974257 | 0.635296131 | 0.62  | 0.541 | 1           | 1.146025878 | mastocyte      | CLGN         |
| FAM114A1     | 0           | 0.634979007 | 0.356 | 0.05  | 0           | 7.12        | Leydig_cells   | FAM114A1     |
| C21orf59     | 0           | 0.634925151 | 0.846 | 0.298 | 0           | 2.838926174 | spermatocyte   | C21orf59     |
| PALLD        | 0           | 0.634729721 | 0.915 | 0.374 | 0           | 2.446524064 | spermatocyte   | PALLD        |
| OOSP2        | 0           | 0.634704976 | 0.191 | 0.004 | 0           | 47.75       | Sertoli_cells  | OOSP2        |
| CD814        | 1.61E-67    | 0.634571054 | 0.446 | 0.309 | 9.85E-63    | 1.44E+00    | Sertoli_cells  | CD81         |
| KDM1A        | 0           | 0.634519464 | 0.704 | 0.451 | 0           | 1.56097561  | spermatogonia  | KDM1A        |
| DAZAP2       | 3.99E-11    | 0.634449722 | 0.438 | 0.339 | 2.45E-06    | 1.29E+00    | macrophages    | DAZAP2       |
| IFNGR12      | 0.008671569 | 0.63420369  | 0.237 | 0.122 | 1           | 1.942622951 | T_cells        | IFNGR1       |
| CT83         | 0           | 0.634146353 | 0.527 | 0.233 | 0           | 2.261802575 | spermatid      | CT83         |
| TFPI1        | 3.87E-190   | 0.634010519 | 0.361 | 0.101 | 2.37E-185   | 3.57E+00    | Leydig_cells   | TFPI         |
| RP11.402G3.5 | 0           | 0.633995749 | 0.259 | 0.04  | 0           | 6.475       | spermatid      | RP11.402G3.5 |
| TAGLN24      | 0.002920771 | 0.633957108 | 0.368 | 0.213 | 1           | 1.727699531 | T_cells        | TAGLN2       |
| DDIT44       | 1.78E-07    | 0.633857953 | 0.316 | 0.087 | 0.01094533  | 3.632183908 | T_cells        | DDIT4        |
| CAMK2N1      | 0           | 0.633835552 | 0.384 | 0.037 | 0           | 10.37837838 | PTM_cells      | CAMK2N1      |
| BCL6         | 1.50E-25    | 0.633592802 | 0.273 | 0.102 | 9.21E-21    | 2.68E+00    | macrophages    | BCL6         |
| PHYHIPL      | 0           | 0.633207904 | 0.895 | 0.346 | 0           | 2.586705202 | spermatocyte   | PHYHIPL      |
| CYFIP2       | 0.001077632 | 0.6331512   | 0.184 | 0.064 | 1           | 2.875       | T_cells        | CYFIP2       |
| SPDL1        | 0           | 0.633124597 | 0.509 | 0.2   | 0           | 2.545       | spermatogonia  | SPDL1        |
| FERMT2       | 2.80E-207   | 0.63284256  | 0.534 | 0.216 | 1.72E-202   | 2.47E+00    | PTM_cells      | FERMT2       |
| TMEM981      | 0           | 0.632795703 | 0.465 | 0.107 | 0           | 4.345794393 | PTM_cells      | TMEM98       |
| CTNNA3       | 0           | 0.632753872 | 0.463 | 0.104 | 0           | 4.451923077 | spermatid      | CTNNA3       |
| AES1         | 0           | 0.632710218 | 0.547 | 0.13  | 0           | 4.207692308 | PTM_cells      | AES          |
| CALU1        | 2.05E-240   | 0.632553806 | 0.509 | 0.173 | 1.26E-235   | 2.94E+00    | PTM_cells      | CALU         |
| SLFN51       | 7.17E-12    | 0.632440402 | 0.184 | 0.022 | 4.40E-07    | 8.36E+00    | T_cells        | SLFN5        |
| SERPINA1     | 0           | 0.632315512 | 0.185 | 0.001 | 0           | 185         | macrophages    | SERPINA1     |
| SLC52A3      | 0           | 0.632294161 | 0.23  | 0.008 | 0           | 28.75       | Sertoli_cells  | SLC52A3      |

|               |             |             |       |       |           |             |                |               |
|---------------|-------------|-------------|-------|-------|-----------|-------------|----------------|---------------|
| GADD45G2      | 3.76E-88    | 0.632222127 | 0.321 | 0.075 | 2.31E-83  | 4.28E+00    | VSM_cells      | GADD45G       |
| STAG3         | 0           | 0.632024011 | 0.559 | 0.304 | 0         | 1.838815789 | spermatogonia  | STAG3         |
| C11orf97      | 0           | 0.631953399 | 0.601 | 0.193 | 0         | 3.113989637 | spermatocyte   | C11orf97      |
| ANXA5         | 4.34E-69    | 0.631905793 | 0.658 | 0.315 | 2.66E-64  | 2.09E+00    | endotheliocyte | ANXA5         |
| APRT1         | 6.07E-05    | 0.631472492 | 0.395 | 0.181 | 1         | 2.182320442 | T_cells        | APRT          |
| JAM21         | 3.30E-121   | 0.631403487 | 0.254 | 0.092 | 2.02E-116 | 2.76E+00    | Sertoli_cells  | JAM2          |
| BPI           | 0           | 0.631373582 | 0.551 | 0.217 | 0         | 2.539170507 | spermatid      | BPI           |
| KRT72         | 0           | 0.631301021 | 0.602 | 0.085 | 0         | 7.082352941 | spermatocyte   | KRT72         |
| HSPD1         | 0           | 0.631235994 | 0.497 | 0.154 | 0         | 3.227272727 | spermatogonia  | HSPD1         |
| ZBTB38        | 0           | 0.631185034 | 0.572 | 0.306 | 0         | 1.869281046 | spermatid      | ZBTB38        |
| RP11.120B7.1  | 2.81E-11    | 0.631178479 | 0.421 | 0.301 | 1.72E-06  | 1.40E+00    | macrophages    | RP11.120B7.1  |
| GUCY1B3       | 0           | 0.631081559 | 0.332 | 0.013 | 0         | 25.53846154 | VSM_cells      | GUCY1B3       |
| GABRG3-AS1    | 0           | 0.631078745 | 0.361 | 0.171 | 0         | 2.111111111 | spermatid      | GABRG3-AS1    |
| VMO1          | 0           | 0.630972193 | 0.212 | 0.005 | 0         | 42.4        | macrophages    | VMO1          |
| TYMS          | 0           | 0.63095259  | 0.742 | 0.196 | 0         | 3.785714286 | spermatocyte   | TYMS          |
| ZNF829        | 0           | 0.630935314 | 0.517 | 0.246 | 0         | 2.101626016 | spermatid      | ZNF829        |
| RPS3A1        | 7.13E-206   | 0.630879634 | 0.961 | 0.896 | 4.38E-201 | 1.07E+00    | Leydig_cells   | RPS3A         |
| C2orf73       | 0           | 0.630845928 | 0.625 | 0.448 | 0         | 1.395089286 | spermatid      | C2orf73       |
| AC015971.2    | 0           | 0.630627467 | 0.391 | 0.133 | 0         | 2.939849624 | spermatid      | AC015971.2    |
| BEND2         | 0           | 0.630616169 | 0.225 | 0.014 | 0         | 16.07142857 | spermatogonia  | BEND2         |
| RABGAP1L      | 0           | 0.630484519 | 0.841 | 0.286 | 0         | 2.940559441 | spermatocyte   | RABGAP1L      |
| RBM39         | 0           | 0.63033431  | 0.705 | 0.417 | 0         | 1.690647482 | spermatogonia  | RBM39         |
| CRTAP         | 2.12E-23    | 0.630086178 | 0.276 | 0.107 | 1.30E-18  | 2.58E+00    | macrophages    | CRTAP         |
| KDELR1        | 6.91E-137   | 0.629889952 | 0.533 | 0.245 | 4.24E-132 | 2.18E+00    | Leydig_cells   | KDELR1        |
| RPGRIP1       | 0           | 0.629876061 | 0.924 | 0.362 | 0         | 2.552486188 | spermatocyte   | RPGRIP1       |
| POLR2B        | 0           | 0.629595291 | 0.509 | 0.132 | 0         | 3.856060606 | spermatogonia  | POLR2B        |
| CREBRF        | 0           | 0.629525668 | 0.537 | 0.187 | 0         | 2.871657754 | spermatogonia  | CREBRF        |
| PGK1          | 4.75E-23    | 0.629511092 | 0.343 | 0.158 | 2.91E-18  | 2.17E+00    | macrophages    | PGK1          |
| PRELP         | 0           | 0.629319447 | 0.343 | 0.025 | 0         | 13.72       | PTM_cells      | PRELP         |
| RPL373        | 1.64E-208   | 0.629305155 | 0.893 | 0.801 | 1.01E-203 | 1.11E+00    | PTM_cells      | RPL37         |
| GJA1          | 5.10E-155   | 0.629171874 | 0.228 | 0.022 | 3.13E-150 | 1.04E+01    | endotheliocyte | GJA1          |
| TACC1         | 2.01E-17    | 0.629166496 | 0.38  | 0.209 | 1.24E-12  | 1.82E+00    | macrophages    | TACC1         |
| GSKIP         | 0           | 0.629147003 | 0.543 | 0.35  | 0         | 1.551428571 | spermatid      | GSKIP         |
| IRF8          | 6.79E-134   | 0.628919236 | 0.219 | 0.018 | 4.16E-129 | 1.22E+01    | macrophages    | IRF8          |
| RPL82         | 1.97E-223   | 0.628850498 | 0.922 | 0.852 | 1.21E-218 | 1.08E+00    | PTM_cells      | RPL8          |
| PCMT1         | 0           | 0.628835004 | 0.701 | 0.641 | 0         | 1.093603744 | spermatid      | PCMT1         |
| LNP1          | 0           | 0.628809199 | 0.801 | 0.188 | 0         | 4.260638298 | spermatocyte   | LNP1          |
| CTSZ          | 1.21E-217   | 0.628480072 | 0.422 | 0.055 | 7.44E-213 | 7.67E+00    | endotheliocyte | CTSZ          |
| MRPL20        | 0           | 0.62834471  | 0.581 | 0.29  | 0         | 2.003448276 | spermatogonia  | MRPL20        |
| SSFA2         | 7.81E-61    | 0.628337245 | 0.464 | 0.178 | 4.79E-56  | 2.61E+00    | endotheliocyte | SSFA2         |
| MBNL1         | 1.44E-112   | 0.628261297 | 0.437 | 0.1   | 8.84E-108 | 4.37E+00    | endotheliocyte | MBNL1         |
| IRF13         | 7.14E-133   | 0.628239724 | 0.472 | 0.211 | 4.38E-128 | 2.24E+00    | PTM_cells      | IRF1          |
| CCDC181       | 0           | 0.628124816 | 0.897 | 0.361 | 0         | 2.484764543 | spermatocyte   | CCDC181       |
| SFRP11        | 0           | 0.6281221   | 0.438 | 0.087 | 0         | 5.034482759 | PTM_cells      | SFRP1         |
| ARL15         | 4.27E-231   | 0.628007105 | 0.293 | 0.025 | 2.62E-226 | 1.17E+01    | endotheliocyte | ARL15         |
| NR6A1         | 0           | 0.62799581  | 0.591 | 0.353 | 0         | 1.674220963 | spermatogonia  | NR6A1         |
| MAFB1         | 2.81E-243   | 0.627908641 | 0.302 | 0.055 | 1.72E-238 | 5.49E+00    | Leydig_cells   | MAFB          |
| LINC00694     | 0           | 0.627722687 | 0.575 | 0.194 | 0         | 2.963917526 | spermatocyte   | LINC00694     |
| DPYSL3        | 3.39E-83    | 0.627712834 | 0.414 | 0.114 | 2.08E-78  | 3.63E+00    | endotheliocyte | DPYSL3        |
| HMGB13        | 1.27E-74    | 0.627579464 | 0.827 | 0.547 | 7.77E-70  | 1.51E+00    | VSM_cells      | HMGB1         |
| SEC31A        | 9.32E-64    | 0.62748989  | 0.461 | 0.304 | 5.72E-59  | 1.52E+00    | Leydig_cells   | SEC31A        |
| MT2A2         | 5.25E-161   | 0.62747023  | 0.514 | 0.218 | 3.22E-156 | 2.36E+00    | PTM_cells      | MT2A          |
| SELK          | 5.30E-18    | 0.627467249 | 0.479 | 0.529 | 3.25E-13  | 9.05E-01    | Sertoli_cells  | SELK          |
| SPNS2         | 0           | 0.627383233 | 0.283 | 0.007 | 0         | 40.42857143 | endotheliocyte | SPNS2         |
| ELMO3         | 0           | 0.627322584 | 0.498 | 0.128 | 0         | 3.890625    | spermatocyte   | ELMO3         |
| DCTN1         | 1.33E-39    | 0.627300587 | 0.349 | 0.261 | 8.16E-35  | 1.34E+00    | Sertoli_cells  | DCTN1         |
| EIF4A1        | 8.22E-63    | 0.627289519 | 0.533 | 0.235 | 5.04E-58  | 2.27E+00    | endotheliocyte | EIF4A1        |
| MBNL12        | 1.92E-186   | 0.627249396 | 0.355 | 0.094 | 1.18E-181 | 3.78E+00    | Leydig_cells   | MBNL1         |
| CENPW         | 0           | 0.626898145 | 0.795 | 0.277 | 0         | 2.870036101 | spermatocyte   | CENPW         |
| CENPU         | 0           | 0.626854218 | 0.972 | 0.534 | 0         | 1.820224719 | spermatocyte   | CENPU         |
| MYL12B        | 9.95E-49    | 0.626850881 | 0.769 | 0.624 | 6.10E-44  | 1.23E+00    | endotheliocyte | MYL12B        |
| ZFAS12        | 7.28E-92    | 0.626794161 | 0.47  | 0.259 | 4.47E-87  | 1.81E+00    | Leydig_cells   | ZFAS1         |
| NUDT3         | 0           | 0.626567231 | 0.551 | 0.162 | 0         | 3.401234568 | spermatogonia  | NUDT3         |
| MAEL          | 0           | 0.626490464 | 0.986 | 0.617 | 0         | 1.598055105 | spermatocyte   | MAEL          |
| COMMD6        | 0.007980703 | 0.626388492 | 0.526 | 0.487 | 1         | 1.080082136 | T_cells        | COMMD6        |
| AC093901.1    | 0           | 0.626323056 | 0.838 | 0.245 | 0         | 3.420408163 | spermatocyte   | AC093901.1    |
| MSRB3         | 0           | 0.626174123 | 0.407 | 0.065 | 0         | 6.261538462 | PTM_cells      | MSRB3         |
| RBBP7         | 3.23E-220   | 0.626092144 | 0.591 | 0.23  | 1.98E-215 | 2.57E+00    | PTM_cells      | RBBP7         |
| GADD45G1      | 0           | 0.626007509 | 0.415 | 0.062 | 0         | 6.693548387 | PTM_cells      | GADD45G       |
| TXN3          | 1.98E-83    | 0.625925342 | 0.598 | 0.258 | 1.22E-78  | 2.32E+00    | VSM_cells      | TXN           |
| PRPF6         | 0           | 0.625781095 | 0.615 | 0.315 | 0         | 1.952380952 | spermatogonia  | PRPF6         |
| RP11-80F22.15 | 0           | 0.625757246 | 0.554 | 0.209 | 0         | 2.650717703 | spermatocyte   | RP11-80F22.15 |
| SYNPO2        | 0           | 0.625729961 | 0.386 | 0.044 | 0         | 8.772727273 | PTM_cells      | SYNPO2        |
| MT.CO31       | 2.43E-29    | 0.625679485 | 0.572 | 0.326 | 1.49E-24  | 1.75E+00    | macrophages    | MT.CO3        |
| SLC25A4       | 8.35E-86    | 0.625586612 | 0.518 | 0.201 | 5.13E-81  | 2.58E+00    | VSM_cells      | SLC25A4       |

|             |             |             |       |       |             |             |                |             |
|-------------|-------------|-------------|-------|-------|-------------|-------------|----------------|-------------|
| FHL1        | 0           | 0.625404797 | 0.596 | 0.297 | 0           | 2.006734007 | spermatid      | FHL1        |
| ZC3H12A     | 2.83E-25    | 0.625394291 | 0.219 | 0.071 | 1.74E-20    | 3.08E+00    | macrophages    | ZC3H12A     |
| PCYOX11     | 0           | 0.625365476 | 0.478 | 0.104 | 0           | 4.596153846 | PTM_cells      | PCYOX1      |
| C7orf62     | 0           | 0.62530001  | 0.833 | 0.227 | 0           | 3.669603524 | spermatocyte   | C7orf62     |
| RMND5B      | 0           | 0.625250353 | 0.922 | 0.396 | 0           | 2.328282828 | spermatocyte   | RMND5B      |
| DDX42       | 0           | 0.625105327 | 0.528 | 0.178 | 0           | 2.966292135 | spermatogonia  | DDX42       |
| RPS61       | 4.06E-07    | 0.625034158 | 0.947 | 0.931 | 0.024901783 | 1.017185822 | T_cells        | RPS6        |
| RHOC        | 3.02E-95    | 0.62481709  | 0.511 | 0.15  | 1.85E-90    | 3.41E+00    | endotheliocyte | RHOC        |
| FAM8A1      | 0           | 0.624592122 | 0.574 | 0.403 | 0           | 1.424317618 | spermatid      | FAM8A1      |
| SPRED1      | 1.01E-22    | 0.624511504 | 0.316 | 0.144 | 6.23E-18    | 2.19E+00    | macrophages    | SPRED1      |
| SYCE1       | 3.13E-304   | 0.624470259 | 0.615 | 0.423 | 1.92E-299   | 1.45E+00    | spermatogonia  | SYCE1       |
| PDZD9       | 0           | 0.624397385 | 0.781 | 0.164 | 0           | 4.762195122 | spermatocyte   | PDZD9       |
| ATP6V0E12   | 4.00E-27    | 0.624301589 | 0.36  | 0.299 | 2.45E-22    | 1.20E+00    | Sertoli_cells  | ATP6V0E1    |
| ASGR1       | 0           | 0.624284037 | 0.478 | 0.168 | 0           | 2.845238095 | spermatid      | ASGR1       |
| STARD6      | 0           | 0.624220538 | 0.819 | 0.261 | 0           | 3.137931034 | spermatocyte   | STARD6      |
| TIMP1       | 4.15E-143   | 0.62418697  | 0.653 | 0.161 | 2.55E-138   | 4.06E+00    | endotheliocyte | TIMP1       |
| LINC00657   | 3.38E-125   | 0.623786215 | 0.488 | 0.25  | 2.07E-120   | 1.95E+00    | PTM_cells      | LINC00657   |
| TNFRSF14    | 3.81E-22    | 0.623652493 | 0.237 | 0.02  | 2.34E-17    | 1.19E+01    | T_cells        | TNFRSF14    |
| SYNE1       | 3.62E-77    | 0.623578    | 0.422 | 0.126 | 2.22E-72    | 3.35E+00    | endotheliocyte | SYNE1       |
| DEK         | 0           | 0.623548201 | 0.449 | 0.153 | 0           | 2.934640523 | spermatogonia  | DEK         |
| C10orf128   | 0           | 0.623391375 | 0.313 | 0.005 | 0           | 62.6        | endotheliocyte | C10orf128   |
| GTF3C2-AS1  | 0           | 0.623384629 | 0.34  | 0.101 | 0           | 3.366336634 | spermatid      | GTF3C2-AS1  |
| PSMD2       | 0           | 0.623362907 | 0.742 | 0.535 | 0           | 1.386915888 | spermatogonia  | PSMD2       |
| KIF3A       | 0           | 0.623267986 | 0.65  | 0.409 | 0           | 1.589242054 | spermatogonia  | KIF3A       |
| CHCHD101    | 6.76E-31    | 0.622986252 | 0.202 | 0.122 | 4.15E-26    | 1.66E+00    | Sertoli_cells  | CHCHD10     |
| AES2        | 1.13E-135   | 0.622851622 | 0.345 | 0.138 | 6.91E-131   | 2.50E+00    | Sertoli_cells  | AES         |
| MT-ATP65    | 1.59E-30    | 0.62276767  | 0.502 | 0.43  | 9.74E-26    | 1.17E+00    | Sertoli_cells  | MT-ATP6     |
| SIRPA       | 3.39E-97    | 0.622702218 | 0.219 | 0.025 | 2.08E-92    | 8.76E+00    | macrophages    | SIRPA       |
| ATP5E2      | 6.20E-05    | 0.622579697 | 0.737 | 0.67  | 1           | 1.1         | T_cells        | ATP5E       |
| NINJ1       | 2.07E-36    | 0.622508628 | 0.222 | 0.057 | 1.27E-31    | 3.89E+00    | macrophages    | NINJ1       |
| EIF2AK2     | 3.81E-140   | 0.622503318 | 0.387 | 0.067 | 2.34E-135   | 5.78E+00    | endotheliocyte | EIF2AK2     |
| REG3G       | 0           | 0.622400268 | 0.186 | 0.004 | 0           | 46.5        | Sertoli_cells  | REG3G       |
| NUDT41      | 5.57E-35    | 0.622270714 | 0.588 | 0.41  | 3.42E-30    | 1.43E+00    | VSM_cells      | NUDT4       |
| TSPAN18     | 7.04E-109   | 0.622109079 | 0.37  | 0.078 | 4.32E-104   | 4.74E+00    | endotheliocyte | TSPAN18     |
| ZNF596      | 0           | 0.621977324 | 0.736 | 0.134 | 0           | 5.492537313 | spermatocyte   | ZNF596      |
| PINK1       | 0           | 0.621911825 | 0.904 | 0.455 | 0           | 1.986813187 | spermatocyte   | PINK1       |
| RAC1        | 0           | 0.621901396 | 0.606 | 0.317 | 0           | 1.911671924 | spermatogonia  | RAC1        |
| EHD2        | 0           | 0.621693698 | 0.313 | 0.038 | 0           | 8.236842105 | Leydig_cells   | EHD2        |
| HNRNPA15    | 0.002891881 | 0.621513083 | 0.658 | 0.605 | 1           | 1.087603306 | T_cells        | HNRNPA1     |
| RP11-12M5.1 | 0           | 0.621417876 | 0.345 | 0.139 | 0           | 2.482014388 | spermatid      | RP11-12M5.1 |
| CSE1L       | 0           | 0.621397831 | 0.677 | 0.441 | 0           | 1.535147392 | spermatogonia  | CSE1L       |
| BAG2        | 0           | 0.621300333 | 0.798 | 0.238 | 0           | 3.352941176 | spermatocyte   | BAG2        |
| TUBA3D      | 0           | 0.621292534 | 0.97  | 0.456 | 0           | 2.127192982 | spermatocyte   | TUBA3D      |
| CRAT        | 0           | 0.621251471 | 0.942 | 0.446 | 0           | 2.112107623 | spermatocyte   | CRAT        |
| PKM1        | 1.42E-70    | 0.621218496 | 0.588 | 0.52  | 8.71E-66    | 1.13E+00    | Sertoli_cells  | PKM         |
| PPIA        | 0           | 0.621208189 | 0.773 | 0.587 | 0           | 1.316865417 | spermatogonia  | PPIA        |
| KMT2B       | 0           | 0.621195586 | 0.452 | 0.102 | 0           | 4.431372549 | spermatogonia  | KMT2B       |
| PPIA1       | 3.86E-57    | 0.621174357 | 0.859 | 0.623 | 2.37E-52    | 1.38E+00    | endotheliocyte | PPIA        |
| PPP2CB      | 3.97E-133   | 0.621161868 | 0.572 | 0.336 | 2.43E-128   | 1.70E+00    | PTM_cells      | PPP2CB      |
| C9orf135    | 0           | 0.620950559 | 0.663 | 0.176 | 0           | 3.767045455 | spermatocyte   | C9orf135    |
| PPA1        | 0           | 0.620949742 | 0.58  | 0.223 | 0           | 2.600896861 | spermatogonia  | PPA1        |
| THAP5       | 0           | 0.620670499 | 0.601 | 0.407 | 0           | 1.476658477 | spermatid      | THAP5       |
| RASIP1      | 1.15E-195   | 0.620593403 | 0.4   | 0.054 | 7.04E-191   | 7.41E+00    | endotheliocyte | RASIP1      |
| ATG4D       | 0           | 0.620419429 | 0.748 | 0.185 | 0           | 4.043243243 | spermatocyte   | ATG4D       |
| RPL261      | 1.68E-26    | 0.62040797  | 0.832 | 0.755 | 1.03E-21    | 1.10E+00    | macrophages    | RPL26       |
| WBP2NL      | 0           | 0.620190415 | 0.529 | 0.241 | 0           | 2.195020747 | spermatid      | WBP2NL      |
| WWTR11      | 0           | 0.620188601 | 0.416 | 0.087 | 0           | 4.781609195 | PTM_cells      | WWTR1       |
| ELN1        | 0           | 0.620016538 | 0.36  | 0.034 | 0           | 10.58823529 | PTM_cells      | ELN         |
| MYL65       | 2.69E-06    | 0.619921393 | 0.816 | 0.665 | 0.165289757 | 1.227067669 | T_cells        | MYL6        |
| AXL         | 2.64E-30    | 0.61987537  | 0.219 | 0.063 | 1.62E-25    | 3.48E+00    | macrophages    | AXL         |
| ANXA6       | 7.33E-226   | 0.619766375 | 0.481 | 0.163 | 4.50E-221   | 2.95E+00    | PTM_cells      | ANXA6       |
| RPS10       | 6.03E-38    | 0.619522029 | 0.7   | 0.538 | 3.70E-33    | 1.30E+00    | endotheliocyte | RPS10       |
| CLK4        | 0           | 0.619458414 | 0.514 | 0.297 | 0           | 1.730639731 | spermatid      | CLK4        |
| VDAC3       | 0           | 0.619356974 | 0.887 | 0.442 | 0           | 2.00678733  | spermatocyte   | VDAC3       |
| FTL4        | 2.23E-90    | 0.619305302 | 0.831 | 0.523 | 1.37E-85    | 1.59E+00    | VSM_cells      | FTL         |
| DXO         | 0           | 0.619299483 | 0.632 | 0.502 | 0           | 1.258964143 | spermatid      | DXO         |
| RAD9B       | 0           | 0.619190755 | 0.387 | 0.05  | 0           | 7.74        | spermatogonia  | RAD9B       |
| SEMA3G      | 6.43E-282   | 0.619156793 | 0.171 | 0.006 | 3.95E-277   | 2.85E+01    | endotheliocyte | SEMA3G      |
| HIPK3       | 4.16E-45    | 0.619151934 | 0.444 | 0.201 | 2.55E-40    | 2.21E+00    | endotheliocyte | HIPK3       |
| BNIP3L      | 8.11E-88    | 0.619119021 | 0.649 | 0.534 | 4.97E-83    | 1.22E+00    | Leydig_cells   | BNIP3L      |
| LINC01120   | 0           | 0.619062028 | 0.201 | 0.029 | 0           | 6.931034483 | spermatogonia  | LINC01120   |
| ELOF1       | 0           | 0.61903158  | 0.958 | 0.513 | 0           | 1.867446394 | spermatocyte   | ELOF1       |
| FAM122B     | 0           | 0.618948004 | 0.235 | 0.021 | 0           | 11.19047619 | Sertoli_cells  | FAM122B     |
| LDHB2       | 6.64E-106   | 0.618929547 | 0.626 | 0.215 | 4.07E-101   | 2.91E+00    | VSM_cells      | LDHB        |
| ISCA1       | 0           | 0.618816189 | 0.657 | 0.527 | 0           | 1.246679317 | spermatid      | ISCA1       |

|               |             |             |       |       |             |             |                |               |
|---------------|-------------|-------------|-------|-------|-------------|-------------|----------------|---------------|
| MORF4L2       | 2.78E-94    | 0.618809166 | 0.523 | 0.311 | 1.71E-89    | 1.68E+00    | Leydig_cells   | MORF4L2       |
| TBXAS1        | 0           | 0.618660656 | 0.215 | 0.004 | 0           | 53.75       | macrophages    | TBXAS1        |
| RPS72         | 3.40E-74    | 0.618581819 | 0.915 | 0.799 | 2.09E-69    | 1.15E+00    | VSM_cells      | RPS7          |
| THEMIS2       | 0           | 0.618446275 | 0.185 | 0.01  | 0           | 18.5        | Sertoli_cells  | THEMIS2       |
| RPS6KA3       | 3.40E-260   | 0.618388203 | 0.367 | 0.034 | 2.08E-255   | 1.08E+01    | endotheliocyte | RPS6KA3       |
| H1FX2         | 9.16E-79    | 0.618376553 | 0.419 | 0.135 | 5.62E-74    | 3.10E+00    | VSM_cells      | H1FX          |
| TBX2-AS1      | 0           | 0.618346504 | 0.298 | 0.018 | 0           | 16.55555556 | VSM_cells      | TBX2-AS1      |
| PPIA2         | 9.87E-24    | 0.618224813 | 0.744 | 0.626 | 6.06E-19    | 1.19E+00    | macrophages    | PPIA          |
| HLA.DOA       | 0           | 0.618172367 | 0.165 | 0.001 | 0           | 165         | macrophages    | HLA.DOA       |
| METTL5        | 0           | 0.618172183 | 0.42  | 0.081 | 0           | 5.185185185 | spermatogonia  | METTL5        |
| SLCO3A1       | 0           | 0.618109099 | 0.854 | 0.27  | 0           | 3.162962963 | spermatocyte   | SLCO3A1       |
| HSD17B11      | 0           | 0.617881669 | 0.409 | 0.035 | 0           | 11.68571429 | endotheliocyte | HSD17B11      |
| RBM392        | 8.53E-19    | 0.617754078 | 0.606 | 0.478 | 5.23E-14    | 1.27E+00    | macrophages    | RBM39         |
| RPS153        | 1.66E-78    | 0.617635068 | 0.89  | 0.764 | 1.02E-73    | 1.16E+00    | VSM_cells      | RPS15         |
| ARV1          | 0           | 0.617450752 | 0.768 | 0.2   | 0           | 3.84        | spermatocyte   | ARV1          |
| RP13-270P17.1 | 0           | 0.617299117 | 0.548 | 0.171 | 0           | 3.204678363 | spermatocyte   | RP13-270P17.1 |
| DDI1          | 0           | 0.617248224 | 0.619 | 0.276 | 0           | 2.242753623 | spermatid      | DDI1          |
| PRDX23        | 1.16E-156   | 0.617232119 | 0.495 | 0.104 | 7.15E-152   | 4.76E+00    | VSM_cells      | PRDX2         |
| COX7A1        | 3.15E-155   | 0.617045061 | 0.442 | 0.079 | 1.93E-150   | 5.59E+00    | endotheliocyte | COX7A1        |
| ELF1          | 7.53E-107   | 0.616923845 | 0.434 | 0.107 | 4.62E-102   | 4.06E+00    | endotheliocyte | ELF1          |
| SIRT2         | 0           | 0.616822093 | 0.47  | 0.177 | 0           | 2.655367232 | spermatid      | SIRT2         |
| ADAMTS5       | 0           | 0.616730132 | 0.24  | 0.02  | 0           | 12          | Leydig_cells   | ADAMTS5       |
| LBH1          | 1.67E-06    | 0.616544898 | 0.316 | 0.101 | 0.102240605 | 3.128712871 | T_cells        | LBH           |
| CETN31        | 6.70E-05    | 0.616544149 | 0.58  | 0.39  | 1           | 1.487179487 | mastocyte      | CETN3         |
| RP11.545G3.1  | 0           | 0.616359781 | 0.27  | 0.1   | 0           | 2.7         | spermatid      | RP11.545G3.1  |
| NOTCH4        | 4.54E-69    | 0.616319886 | 0.387 | 0.124 | 2.78E-64    | 3.12E+00    | endotheliocyte | NOTCH4        |
| TMEM232       | 0           | 0.616201442 | 0.817 | 0.24  | 0           | 3.404166667 | spermatocyte   | TMEM232       |
| LAIR1         | 1.28E-20    | 0.616174919 | 0.239 | 0.096 | 7.87E-16    | 2.49E+00    | macrophages    | LAIR1         |
| SELENBP1      | 0           | 0.616133409 | 0.289 | 0.019 | 0           | 15.21052632 | Leydig_cells   | SELENBP1      |
| DR1           | 0           | 0.616129997 | 0.933 | 0.4   | 0           | 2.3325      | spermatocyte   | DR1           |
| TRAPPC1       | 2.30E-11    | 0.615939755 | 0.301 | 0.286 | 1.41E-06    | 1.05E+00    | Sertoli_cells  | TRAPPC1       |
| USF2          | 1.74E-36    | 0.615663801 | 0.286 | 0.087 | 1.07E-31    | 3.29E+00    | macrophages    | USF2          |
| NDUFA13       | 4.08E-208   | 0.61563703  | 0.566 | 0.451 | 2.51E-203   | 1.25E+00    | spermatid      | NDUFA13       |
| IER52         | 3.10E-146   | 0.615624681 | 0.375 | 0.126 | 1.90E-141   | 2.98E+00    | Leydig_cells   | IER5          |
| TNFRSF1B      | 1.74E-224   | 0.615586213 | 0.199 | 0.008 | 1.07E-219   | 2.49E+01    | macrophages    | TNFRSF1B      |
| FAM205A       | 0           | 0.615551151 | 0.448 | 0.179 | 0           | 2.502793296 | spermatid      | FAM205A       |
| TGFBR3        | 8.52E-40    | 0.615543105 | 0.365 | 0.152 | 5.22E-35    | 2.40E+00    | endotheliocyte | TGFBR3        |
| KRBOX1        | 0           | 0.61553934  | 0.738 | 0.513 | 0           | 1.438596491 | spermatogonia  | KRBOX1        |
| MTX1          | 0           | 0.615519303 | 0.686 | 0.519 | 0           | 1.32177264  | spermatid      | MTX1          |
| MAPK13        | 0           | 0.615440492 | 0.865 | 0.275 | 0           | 3.145454545 | spermatocyte   | MAPK13        |
| TSGA10        | 0           | 0.615439368 | 0.958 | 0.47  | 0           | 2.038297872 | spermatocyte   | TSGA10        |
| C4orf17       | 0           | 0.615378579 | 0.566 | 0.171 | 0           | 3.30994152  | spermatocyte   | C4orf17       |
| UQCRH2        | 3.26E-20    | 0.615361155 | 0.436 | 0.438 | 2.00E-15    | 9.95E-01    | Sertoli_cells  | UQCRH         |
| NUP93         | 0           | 0.615164116 | 0.526 | 0.168 | 0           | 3.130952381 | spermatogonia  | NUP93         |
| CYB5R2        | 0           | 0.615029357 | 0.957 | 0.423 | 0           | 2.262411348 | spermatocyte   | CYB5R2        |
| MT-CO15       | 4.01E-20    | 0.614881584 | 0.495 | 0.451 | 2.46E-15    | 1.10E+00    | Sertoli_cells  | MT-CO1        |
| MIR22HG1      | 2.95E-105   | 0.614797942 | 0.389 | 0.098 | 1.81E-100   | 3.97E+00    | VSM_cells      | MIR22HG       |
| MAFF2         | 9.93E-207   | 0.614745991 | 0.29  | 0.059 | 6.09E-202   | 4.92E+00    | Leydig_cells   | MAFF          |
| PLK2          | 1.06E-42    | 0.614681141 | 0.501 | 0.252 | 6.51E-38    | 1.99E+00    | endotheliocyte | PLK2          |
| HRASLS5       | 0           | 0.614566958 | 0.958 | 0.42  | 0           | 2.280952381 | spermatocyte   | HRASLS5       |
| ACSL6         | 0           | 0.614449697 | 0.758 | 0.124 | 0           | 6.112903226 | spermatocyte   | ACSL6         |
| CTAGE1        | 0           | 0.614312219 | 0.663 | 0.128 | 0           | 5.1796875   | spermatocyte   | CTAGE1        |
| WDR63         | 0           | 0.614079042 | 0.685 | 0.124 | 0           | 5.524193548 | spermatocyte   | WDR63         |
| MAP7D2        | 0           | 0.614030868 | 0.359 | 0.087 | 0           | 4.126436782 | spermatogonia  | MAP7D2        |
| LYRM7         | 0           | 0.613605685 | 0.859 | 0.316 | 0           | 2.71835443  | spermatocyte   | LYRM7         |
| TRIM17        | 0           | 0.61360126  | 0.46  | 0.167 | 0           | 2.754491018 | spermatid      | TRIM17        |
| KLHL10        | 0           | 0.613312633 | 0.631 | 0.329 | 0           | 1.917933131 | spermatid      | KLHL10        |
| NFE2L1        | 4.12E-72    | 0.6132546   | 0.406 | 0.218 | 2.53E-67    | 1.86E+00    | Leydig_cells   | NFE2L1        |
| RBM35         | 2.39E-89    | 0.613232046 | 0.596 | 0.222 | 1.47E-84    | 2.68E+00    | VSM_cells      | RBM3          |
| CASC3         | 0           | 0.613177479 | 0.571 | 0.264 | 0           | 2.162878788 | spermatogonia  | CASC3         |
| BNC2          | 7.06E-222   | 0.613044806 | 0.32  | 0.068 | 4.33E-217   | 4.71E+00    | Leydig_cells   | BNC2          |
| MT1X1         | 2.13E-219   | 0.612968258 | 0.288 | 0.055 | 1.30E-214   | 5.24E+00    | Leydig_cells   | MT1X          |
| RP5.942I16.1  | 0           | 0.612912312 | 0.37  | 0.114 | 0           | 3.245614035 | spermatocyte   | RP5.942I16.1  |
| NDUFB111      | 1.43E-124   | 0.612878165 | 0.482 | 0.121 | 8.78E-120   | 3.98E+00    | VSM_cells      | NDUFB11       |
| CALU          | 1.98E-111   | 0.612835134 | 0.411 | 0.18  | 1.22E-106   | 2.28E+00    | Leydig_cells   | CALU          |
| FKBP6         | 0           | 0.612734479 | 0.479 | 0.243 | 0           | 1.971193416 | spermatogonia  | FKBP6         |
| RASSF51       | 4.38E-19    | 0.612537272 | 0.184 | 0.014 | 2.69E-14    | 1.31E+01    | T_cells        | RASSF5        |
| MT-ND4L3      | 0.001265581 | 0.612497698 | 0.368 | 0.186 | 1           | 1.978494624 | T_cells        | MT-ND4L       |
| ZFYVE21       | 3.00E-62    | 0.612494263 | 0.531 | 0.225 | 1.84E-57    | 2.36E+00    | endotheliocyte | ZFYVE21       |
| ASF1B         | 0           | 0.612316822 | 0.463 | 0.161 | 0           | 2.875776398 | spermatogonia  | ASF1B         |
| CHGB          | 0           | 0.612244117 | 0.368 | 0.064 | 0           | 5.75        | spermatogonia  | CHGB          |
| ATP6V0E13     | 0.000135426 | 0.612222487 | 0.5   | 0.302 | 1           | 1.655629139 | T_cells        | ATP6V0E1      |
| TMEM179B      | 0           | 0.612147229 | 0.49  | 0.134 | 0           | 3.656716418 | spermatogonia  | TMEM179B      |
| VMP1          | 1.35E-07    | 0.6120622   | 0.283 | 0.197 | 0.008263498 | 1.436548223 | macrophages    | VMP1          |
| HLA-C4        | 6.86E-93    | 0.611964436 | 0.51  | 0.172 | 4.21E-88    | 2.97E+00    | VSM_cells      | HLA-C         |

|              |             |             |       |       |             |             |                |              |
|--------------|-------------|-------------|-------|-------|-------------|-------------|----------------|--------------|
| PDLIM71      | 2.06E-68    | 0.611949641 | 0.425 | 0.156 | 1.26E-63    | 2.72E+00    | VSM_cells      | PDLIM7       |
| SRP14        | 0           | 0.611905759 | 0.854 | 0.696 | 0           | 1.227011494 | spermatogonia  | SRP14        |
| PTAFR        | 6.24E-74    | 0.611873    | 0.172 | 0.02  | 3.83E-69    | 8.60E+00    | macrophages    | PTAFR        |
| CFAP126      | 0           | 0.611806511 | 0.578 | 0.119 | 0           | 4.857142857 | spermatocyte   | CFAP126      |
| LRRC37A      | 0           | 0.611728833 | 0.372 | 0.143 | 0           | 2.601398601 | spermatid      | LRRC37A      |
| LYZL2        | 0           | 0.611636279 | 0.655 | 0.338 | 0           | 1.937869822 | spermatid      | LYZL2        |
| RP11.332E4.1 | 1.30E-07    | 0.611588786 | 0.273 | 0.187 | 0.007962653 | 1.459893048 | macrophages    | RP11.332E4.1 |
| NACA5        | 7.67E-05    | 0.611300951 | 0.789 | 0.749 | 1           | 1.053404539 | T_cells        | NACA         |
| DNAJC15      | 0           | 0.611121793 | 0.877 | 0.432 | 0           | 2.030092593 | spermatocyte   | DNAJC15      |
| ATP6AP2      | 2.48E-170   | 0.611107933 | 0.474 | 0.166 | 1.52E-165   | 2.86E+00    | Leydig_cells   | ATP6AP2      |
| LRRC32       | 0           | 0.610779053 | 0.337 | 0.016 | 0           | 21.0625     | endotheliocyte | LRRC32       |
| LCN6         | 0           | 0.610659933 | 0.335 | 0.001 | 0           | 335         | endotheliocyte | LCN6         |
| C3orf58      | 2.92E-22    | 0.610544788 | 0.232 | 0.086 | 1.79E-17    | 2.70E+00    | macrophages    | C3orf58      |
| SH2D1A       | 5.21E-304   | 0.61046525  | 0.184 | 0.001 | 3.19E-299   | 1.84E+02    | T_cells        | SH2D1A       |
| SOX6         | 0           | 0.610434455 | 0.539 | 0.318 | 0           | 1.694968553 | spermatid      | SOX6         |
| CFL11        | 2.67E-19    | 0.61042863  | 0.751 | 0.737 | 1.64E-14    | 1.02E+00    | macrophages    | CFL1         |
| ITGA1        | 7.60E-123   | 0.610419444 | 0.296 | 0.053 | 4.66E-118   | 5.58E+00    | VSM_cells      | ITGA1        |
| FAM127A1     | 0           | 0.610315864 | 0.434 | 0.062 | 0           | 7           | PTM_cells      | FAM127A      |
| JAML1        | 1.86E-13    | 0.610269305 | 0.132 | 0.01  | 1.14E-08    | 1.32E+01    | T_cells        | JAML         |
| CMIP1        | 1.12E-157   | 0.610265431 | 0.449 | 0.181 | 6.89E-153   | 2.48E+00    | PTM_cells      | CMIP         |
| DDR21        | 0           | 0.610221602 | 0.404 | 0.073 | 0           | 5.534246575 | PTM_cells      | DDR2         |
| ISLR2        | 0           | 0.610178218 | 0.402 | 0.059 | 0           | 6.813559322 | PTM_cells      | ISLR         |
| CRBN         | 0           | 0.610160296 | 0.907 | 0.427 | 0           | 2.12412178  | spermatocyte   | CRBN         |
| PKM          | 0           | 0.610120612 | 0.658 | 0.462 | 0           | 1.424242424 | spermatid      | PKM          |
| PPP4R1       | 3.99E-231   | 0.609940216 | 0.497 | 0.354 | 2.45E-226   | 1.40E+00    | spermatid      | PPP4R1       |
| ALKBH5       | 0           | 0.609864593 | 0.658 | 0.388 | 0           | 1.695876289 | spermatogonia  | ALKBH5       |
| PUF60        | 0           | 0.609863583 | 0.609 | 0.29  | 0           | 2.1         | spermatogonia  | PUF60        |
| CAP2         | 0           | 0.609760362 | 0.328 | 0.011 | 0           | 29.81818182 | VSM_cells      | CAP2         |
| SELT         | 0           | 0.609637273 | 0.437 | 0.127 | 0           | 3.440944882 | spermatogonia  | SELT         |
| AEBP1        | 8.36E-279   | 0.609632651 | 0.403 | 0.081 | 5.13E-274   | 4.98E+00    | Leydig_cells   | AEBP1        |
| FMNL11       | 1.16E-12    | 0.609574543 | 0.184 | 0.021 | 7.12E-08    | 8.76E+00    | T_cells        | FMNL1        |
| RTN3         | 0           | 0.609306327 | 0.639 | 0.386 | 0           | 1.655440415 | spermatogonia  | RTN3         |
| RPL18A6      | 2.10E-130   | 0.609224402 | 0.649 | 0.402 | 1.29E-125   | 1.61E+00    | Sertoli_cells  | RPL18A       |
| CCL8         | 2.72E-07    | 0.609108219 | 0.074 | 0.027 | 0.016714914 | 2.740740741 | macrophages    | CCL8         |
| DOCK9        | 7.11E-212   | 0.60904139  | 0.38  | 0.046 | 4.36E-207   | 8.26E+00    | endotheliocyte | DOCK9        |
| IER5L1       | 3.66E-156   | 0.608942938 | 0.357 | 0.059 | 2.25E-151   | 6.05E+00    | VSM_cells      | IER5L        |
| KANK2        | 2.76E-202   | 0.60894037  | 0.316 | 0.069 | 1.69E-197   | 4.58E+00    | Leydig_cells   | KANK2        |
| RBPMS2       | 3.28E-161   | 0.60893153  | 0.336 | 0.053 | 2.01E-156   | 6.34E+00    | VSM_cells      | RBPMS2       |
| RPLP2        | 3.50E-62    | 0.608894813 | 0.945 | 0.833 | 2.15E-57    | 1.13E+00    | endotheliocyte | RPLP2        |
| ARPC1B2      | 9.56E-169   | 0.608884228 | 0.412 | 0.072 | 5.87E-164   | 5.72E+00    | VSM_cells      | ARPC1B       |
| CCND1        | 0           | 0.608786122 | 0.351 | 0.036 | 0           | 9.75        | PTM_cells      | CCND1        |
| POLR2K       | 0           | 0.608752078 | 0.479 | 0.132 | 0           | 3.628787879 | spermatogonia  | POLR2K       |
| ACTG11       | 2.30E-66    | 0.608695866 | 0.948 | 0.793 | 1.41E-61    | 1.20E+00    | endotheliocyte | ACTG1        |
| TCEAL42      | 9.09E-110   | 0.608685529 | 0.588 | 0.185 | 5.57E-105   | 3.18E+00    | VSM_cells      | TCEAL4       |
| TINAGL1      | 0           | 0.608650997 | 0.328 | 0.02  | 0           | 16.4        | endotheliocyte | TINAGL1      |
| SH3BGRL      | 1.45E-151   | 0.608647629 | 0.531 | 0.106 | 8.92E-147   | 5.01E+00    | endotheliocyte | SH3BGRL      |
| RAB3IP       | 0           | 0.608536434 | 0.611 | 0.4   | 0           | 1.5275      | spermatid      | RAB3IP       |
| GLTSCR22     | 2.52E-49    | 0.608314664 | 0.698 | 0.518 | 1.55E-44    | 1.35E+00    | VSM_cells      | GLTSCR2      |
| TAF7         | 2.60E-29    | 0.608284002 | 0.444 | 0.425 | 1.59E-24    | 1.04E+00    | Sertoli_cells  | TAF7         |
| FLJ36000     | 0           | 0.608260574 | 0.513 | 0.232 | 0           | 2.211206897 | spermatid      | FLJ36000     |
| M6PR         | 0           | 0.6082214   | 0.485 | 0.155 | 0           | 3.129032258 | spermatogonia  | M6PR         |
| COX4I2       | 0           | 0.60819143  | 0.23  | 0.007 | 0           | 32.85714286 | VSM_cells      | COX4I2       |
| LINC01420    | 8.80E-154   | 0.608188088 | 0.207 | 0.052 | 5.40E-149   | 3.98E+00    | Sertoli_cells  | LINC01420    |
| IL13         | 0           | 0.608142621 | 0.816 | 0.202 | 0           | 4.03960396  | spermatocyte   | IL13         |
| CHRAC1       | 0           | 0.608128254 | 0.494 | 0.125 | 0           | 3.952       | spermatogonia  | CHRAC1       |
| COLEC11      | 0           | 0.608093194 | 0.355 | 0.028 | 0           | 12.67857143 | PTM_cells      | COLEC11      |
| SPINT21      | 0.007691661 | 0.607982188 | 0.58  | 0.523 | 1           | 1.108986616 | mastocyte      | SPINT2       |
| TFDP2        | 2.73E-211   | 0.607741905 | 0.665 | 0.575 | 1.67E-206   | 1.16E+00    | spermatid      | TFDP2        |
| GID4         | 0           | 0.607703449 | 0.588 | 0.483 | 0           | 1.217391304 | spermatid      | GID4         |
| NRIP3        | 0           | 0.607701121 | 0.959 | 0.472 | 0           | 2.031779661 | spermatocyte   | NRIP3        |
| SUGP2        | 3.03E-273   | 0.607554093 | 0.651 | 0.517 | 1.86E-268   | 1.26E+00    | spermatogonia  | SUGP2        |
| HCK          | 2.53E-194   | 0.607510587 | 0.205 | 0.011 | 1.55E-189   | 1.86E+01    | macrophages    | HCK          |
| EEF1B21      | 7.87E-100   | 0.607350322 | 0.732 | 0.613 | 4.83E-95    | 1.19E+00    | Leydig_cells   | EEF1B2       |
| CTNNAL11     | 3.25E-10    | 0.607299234 | 0.335 | 0.341 | 2.00E-05    | 9.82E-01    | Sertoli_cells  | CTNNAL1      |
| GRK4         | 0           | 0.607282554 | 0.951 | 0.454 | 0           | 2.094713656 | spermatocyte   | GRK4         |
| MYO5A        | 3.93E-18    | 0.607251447 | 0.199 | 0.074 | 2.41E-13    | 2.69E+00    | macrophages    | MYO5A        |
| NOV          | 0           | 0.607234664 | 0.256 | 0.008 | 0           | 32          | VSM_cells      | NOV          |
| ATRAID       | 0           | 0.607234574 | 0.89  | 0.472 | 0           | 1.88559322  | spermatocyte   | ATRAID       |
| PNN          | 0           | 0.60723225  | 0.613 | 0.354 | 0           | 1.731638418 | spermatogonia  | PNN          |
| CLIC11       | 5.71E-13    | 0.607203493 | 0.384 | 0.264 | 3.50E-08    | 1.45E+00    | macrophages    | CLIC1        |
| SPATC1       | 0           | 0.607199691 | 0.398 | 0.058 | 0           | 6.862068966 | spermatid      | SPATC1       |
| RPS154       | 4.37E-89    | 0.607054119 | 0.779 | 0.766 | 2.68E-84    | 1.02E+00    | Sertoli_cells  | RPS15        |
| DKKL11       | 0           | 0.606974426 | 0.857 | 0.633 | 0           | 1.353870458 | spermatid      | DKKL1        |
| USO1         | 0           | 0.606617904 | 0.548 | 0.219 | 0           | 2.502283105 | spermatogonia  | USO1         |
| AP1S22       | 3.00E-124   | 0.606599498 | 0.262 | 0.092 | 1.84E-119   | 2.85E+00    | Sertoli_cells  | AP1S2        |



|              |             |             |       |       |             |              |                |              |
|--------------|-------------|-------------|-------|-------|-------------|--------------|----------------|--------------|
| FLRT21       | 0           | 0.606530341 | 0.378 | 0.05  | 0           | 7.56         | PTM_cells      | FLRT2        |
| RPS17        | 0           | 0.606426964 | 0.743 | 0.4   | 0           | 1.8575       | spermatogonia  | RPS17        |
| HSPA1B       | 8.32E-97    | 0.606270514 | 0.591 | 0.19  | 5.10E-92    | 3.11E+00     | endotheliocyte | HSPA1B       |
| MYL61        | 3.79E-202   | 0.605834219 | 0.879 | 0.656 | 2.33E-197   | 1.34E+00     | Leydig_cells   | MYL6         |
| FBLN22       | 4.18E-183   | 0.60582334  | 0.277 | 0.076 | 2.57E-178   | 3.64E+00     | Sertoli_cells  | FBLN2        |
| CSF2RA       | 0           | 0.605740925 | 0.182 | 0.001 | 0           | 182          | macrophages    | CSF2RA       |
| CDCA2        | 0           | 0.605736314 | 0.777 | 0.221 | 0           | 3.515837104  | spermatocyte   | CDCA2        |
| FAM27C       | 0           | 0.605722612 | 0.503 | 0.283 | 0           | 1.777385159  | spermatid      | FAM27C       |
| TLN1         | 6.33E-08    | 0.605424593 | 0.404 | 0.328 | 0.003885113 | 1.231707317  | macrophages    | TLN1         |
| SENP1        | 0           | 0.60538328  | 0.533 | 0.31  | 0           | 1.719354839  | spermatogonia  | SENP1        |
| PPP1R15B     | 9.02E-54    | 0.605359549 | 0.392 | 0.146 | 5.53E-49    | 2.68E+00     | endotheliocyte | PPP1R15B     |
| IFNGR1       | 6.60E-73    | 0.605351194 | 0.392 | 0.118 | 4.05E-68    | 3.32E+00     | endotheliocyte | IFNGR1       |
| SOD2         | 1.23E-26    | 0.605231403 | 0.625 | 0.499 | 7.56E-22    | 1.25E+00     | endotheliocyte | SOD2         |
| TSPAN3       | 0           | 0.605206131 | 0.576 | 0.274 | 0           | 2.102189781  | spermatogonia  | TSPAN3       |
| MFF          | 0           | 0.605109566 | 0.985 | 0.688 | 0           | 1.431686047  | spermatocyte   | MFF          |
| RPL374       | 4.45E-74    | 0.605074637 | 0.892 | 0.804 | 2.73E-69    | 1.11E+00     | VSM_cells      | RPL37        |
| FBXW7        | 0           | 0.604968526 | 0.516 | 0.202 | 0           | 2.554455446  | spermatogonia  | FBXW7        |
| ZFYVE211     | 3.29E-200   | 0.604849459 | 0.532 | 0.214 | 2.02E-195   | 2.49E+00     | PTM_cells      | ZFYVE21      |
| PCYT2        | 0           | 0.604770961 | 0.976 | 0.533 | 0           | 1.831144465  | spermatocyte   | PCYT2        |
| TET2         | 7.23E-138   | 0.604717339 | 0.226 | 0.019 | 4.44E-133   | 1.19E+01     | macrophages    | TET2         |
| C1QTNF9B-AS1 | 0           | 0.604644373 | 0.551 | 0.174 | 0           | 3.166666667  | spermatocyte   | C1QTNF9B-AS1 |
| MT-CYB5      | 7.01E-27    | 0.604414495 | 0.471 | 0.393 | 4.30E-22    | 1.20E+00     | Sertoli_cells  | MT-CYB       |
| KRIT1        | 0           | 0.604339145 | 0.515 | 0.239 | 0           | 2.154811715  | spermatogonia  | KRIT1        |
| ABHD4        | 0           | 0.604258529 | 0.22  | 0.021 | 0           | 10.47619048  | Sertoli_cells  | ABHD4        |
| DGCR6        | 0           | 0.604188816 | 0.433 | 0.095 | 0           | 4.557894737  | spermatid      | DGCR6        |
| EIF4A24      | 4.66E-62    | 0.604183704 | 0.761 | 0.462 | 2.86E-57    | 1.65E+00     | VSM_cells      | EIF4A2       |
| RPS251       | 8.45E-74    | 0.604120799 | 0.901 | 0.832 | 5.18E-69    | 1.08E+00     | VSM_cells      | RPS25        |
| GOLGB1       | 5.63E-63    | 0.603950252 | 0.544 | 0.394 | 3.45E-58    | 1.38E+00     | Leydig_cells   | GOLGB1       |
| BCL2         | 2.74E-108   | 0.6039385   | 0.195 | 0.018 | 1.68E-103   | 1.08E+01     | macrophages    | BCL2         |
| RHOC2        | 2.75E-53    | 0.603936362 | 0.268 | 0.148 | 1.69E-48    | 1.81E+00     | Sertoli_cells  | RHOC         |
| PTPN12       | 0           | 0.603782724 | 0.356 | 0.064 | 0           | 5.5625       | spermatogonia  | PTPN12       |
| LYAR1        | 0.000919752 | 0.60370533  | 0.66  | 0.51  | 1           | 1.294117647  | mastocyte      | LYAR         |
| SERINC5      | 7.53E-296   | 0.603643614 | 0.248 | 0.042 | 4.62E-291   | 5.90E+00     | Sertoli_cells  | SERINC5      |
| ADGRA2       | 0           | 0.603573803 | 0.262 | 0.016 | 0           | 16.375       | Leydig_cells   | ADGRA2       |
| MEIOC        | 2.51E-216   | 0.603525033 | 0.599 | 0.495 | 1.54E-211   | 1.21E+00     | spermatogonia  | MEIOC        |
| AZGP1        | 7.17E-185   | 0.603522281 | 0.207 | 0.046 | 4.40E-180   | 4.50E+00     | Sertoli_cells  | AZGP1        |
| TEX15        | 3.47E-127   | 0.60352136  | 0.392 | 0.275 | 2.13E-122   | 1.43E+00     | spermatogonia  | TEX15        |
| SRP19        | 0           | 0.603441707 | 0.671 | 0.205 | 0           | 3.273170732  | spermatocyte   | SRP19        |
| GPBP1L1      | 0           | 0.603376611 | 0.538 | 0.223 | 0           | 2.412556054  | spermatogonia  | GPBP1L1      |
| DSN1         | 0           | 0.603262632 | 0.517 | 0.19  | 0           | 2.721052632  | spermatogonia  | DSN1         |
| HIGD1A       | 0           | 0.603249813 | 0.491 | 0.184 | 0           | 2.668478261  | spermatogonia  | HIGD1A       |
| HMMR         | 0           | 0.603248088 | 0.864 | 0.281 | 0           | 3.074733096  | spermatocyte   | HMMR         |
| REEP4        | 0           | 0.603168951 | 0.692 | 0.165 | 0           | 4.193939394  | spermatocyte   | REEP4        |
| MRGPRF       | 0           | 0.603123513 | 0.367 | 0.03  | 0           | 12.233333333 | PTM_cells      | MRGPRF       |
| ZFAS14       | 4.50E-62    | 0.603006794 | 0.539 | 0.263 | 2.76E-57    | 2.05E+00     | VSM_cells      | ZFAS1        |
| NAP1L1       | 3.05E-133   | 0.602952428 | 0.778 | 0.661 | 1.87E-128   | 1.18E+00     | PTM_cells      | NAP1L1       |
| ESCO2        | 0           | 0.602820505 | 0.333 | 0.054 | 0           | 6.166666667  | spermatogonia  | ESCO2        |
| ANGPTL11     | 0           | 0.602693864 | 0.402 | 0.045 | 0           | 8.933333333  | PTM_cells      | ANGPTL1      |
| THEMIS       | 9.90E-87    | 0.602479903 | 0.184 | 0.003 | 6.07E-82    | 6.13E+01     | T_cells        | THEMIS       |
| SRSF3        | 0           | 0.602400076 | 0.75  | 0.587 | 0           | 1.277683135  | spermatogonia  | SRSF3        |
| CRY1         | 0           | 0.602380635 | 0.452 | 0.157 | 0           | 2.878980892  | spermatogonia  | CRY1         |
| EVI2A        | 7.99E-200   | 0.60237291  | 0.195 | 0.009 | 4.90E-195   | 2.17E+01     | macrophages    | EVI2A        |
| MT-ND21      | 8.06E-56    | 0.602279809 | 0.732 | 0.408 | 4.95E-51    | 1.79E+00     | endotheliocyte | MT-ND2       |
| NFATC2IP     | 0           | 0.602095805 | 0.524 | 0.175 | 0           | 2.994285714  | spermatogonia  | NFATC2IP     |
| TRABD2A      | 0           | 0.602074079 | 0.563 | 0.255 | 0           | 2.207843137  | spermatid      | TRABD2A      |
| UTP6         | 0           | 0.60205144  | 0.525 | 0.233 | 0           | 2.253218884  | spermatogonia  | UTP6         |
| NDUFB2       | 2.37E-280   | 0.602040383 | 0.638 | 0.537 | 1.46E-275   | 1.19E+00     | spermatid      | NDUFB2       |
| SAMD4B       | 0           | 0.601978157 | 0.509 | 0.172 | 0           | 2.959302326  | spermatogonia  | SAMD4B       |
| NAMPTP1      | 7.25E-116   | 0.60188943  | 0.128 | 0.007 | 4.45E-111   | 1.83E+01     | macrophages    | NAMPTP1      |
| PTBP2        | 0           | 0.601839088 | 0.455 | 0.097 | 0           | 4.690721649  | spermatogonia  | PTBP2        |
| POLR1D       | 0           | 0.601802761 | 0.933 | 0.522 | 0           | 1.787356322  | spermatocyte   | POLR1D       |
| TRPC5OS      | 0           | 0.601742085 | 0.2   | 0.005 | 0           | 40           | Sertoli_cells  | TRPC5OS      |
| CKAP2        | 0           | 0.601658603 | 0.54  | 0.264 | 0           | 2.045454545  | spermatogonia  | CKAP2        |
| CNOT1        | 0           | 0.601592743 | 0.881 | 0.391 | 0           | 2.253196931  | spermatocyte   | CNOT1        |
| TMEM225      | 0           | 0.601588347 | 0.747 | 0.134 | 0           | 5.574626866  | spermatocyte   | TMEM225      |
| CCDC7        | 0           | 0.601555597 | 0.956 | 0.448 | 0           | 2.133928571  | spermatocyte   | CCDC7        |
| AC062017.1   | 0           | 0.601547874 | 0.886 | 0.321 | 0           | 2.760124611  | spermatocyte   | AC062017.1   |
| HSP90AB12    | 2.92E-171   | 0.601438959 | 0.871 | 0.711 | 1.79E-166   | 1.23E+00     | PTM_cells      | HSP90AB1     |
| DYNC2L11     | 0           | 0.601375224 | 0.795 | 0.257 | 0           | 3.093385214  | spermatocyte   | DYNC2L1      |
| BTF3         | 2.13E-59    | 0.601352994 | 0.846 | 0.713 | 1.31E-54    | 1.19E+00     | endotheliocyte | BTF3         |
| NGLY1        | 0           | 0.601350715 | 0.7   | 0.57  | 0           | 1.228070175  | spermatid      | NGLY1        |
| EQTN         | 9.09E-290   | 0.601306523 | 0.491 | 0.277 | 5.58E-285   | 1.77E+00     | spermatid      | EQTN         |
| PTPN18       | 2.68E-82    | 0.601263303 | 0.202 | 0.025 | 1.64E-77    | 8.08E+00     | macrophages    | PTPN18       |
| TMEM91       | 0           | 0.601242135 | 0.477 | 0.152 | 0           | 3.138157895  | spermatid      | TMEM91       |
| PPP4C        | 0           | 0.601148969 | 0.639 | 0.439 | 0           | 1.455580866  | spermatogonia  | PPP4C        |

|              |             |             |       |       |             |             |                |              |
|--------------|-------------|-------------|-------|-------|-------------|-------------|----------------|--------------|
| DKKL1        | 0           | 0.601025118 | 0.991 | 0.603 | 0           | 1.64344942  | spermatocyte   | DKKL1        |
| CENPK        | 0           | 0.600975979 | 0.461 | 0.139 | 0           | 3.316546763 | spermatogonia  | CENPK        |
| NT5DC2       | 8.91E-262   | 0.600771307 | 0.447 | 0.121 | 5.46E-257   | 3.69E+00    | PTM_cells      | NT5DC2       |
| PTPN6        | 0.005581804 | 0.600580117 | 0.184 | 0.076 | 1           | 2.421052632 | T_cells        | PTPN6        |
| CELF1        | 0           | 0.600326737 | 0.501 | 0.138 | 0           | 3.630434783 | spermatogonia  | CELF1        |
| SRSF2        | 0           | 0.600099053 | 0.696 | 0.468 | 0           | 1.487179487 | spermatogonia  | SRSF2        |
| NCOA4        | 9.09E-07    | 0.599871883 | 0.387 | 0.338 | 0.055751392 | 1.144970414 | macrophages    | NCOA4        |
| HSPA14       | 0           | 0.599831252 | 0.54  | 0.318 | 0           | 1.698113208 | spermatogonia  | HSPA14       |
| NR2F1        | 2.23E-237   | 0.599807613 | 0.257 | 0.042 | 1.37E-232   | 6.12E+00    | Leydig_cells   | NR2F1        |
| NENF         | 0           | 0.599672298 | 0.476 | 0.108 | 0           | 4.407407407 | PTM_cells      | NENF         |
| MAFF3        | 1.24E-124   | 0.599499409 | 0.336 | 0.064 | 7.64E-120   | 5.25E+00    | VSM_cells      | MAFF         |
| MDK          | 3.03E-108   | 0.599219992 | 0.437 | 0.103 | 1.86E-103   | 4.24E+00    | endotheliocyte | MDK          |
| YPEL2        | 4.93E-97    | 0.599102976 | 0.323 | 0.065 | 3.02E-92    | 4.97E+00    | endotheliocyte | YPEL2        |
| CASQ2        | 3.04E-238   | 0.5990583   | 0.281 | 0.025 | 1.87E-233   | 1.12E+01    | VSM_cells      | CASQ2        |
| CHAF1A       | 0           | 0.598876068 | 0.38  | 0.055 | 0           | 6.909090909 | spermatogonia  | CHAF1A       |
| EEF1B22      | 2.91E-129   | 0.598829278 | 0.757 | 0.611 | 1.78E-124   | 1.24E+00    | PTM_cells      | EEF1B2       |
| ATN11        | 7.90E-57    | 0.598518307 | 0.283 | 0.134 | 4.84E-52    | 2.11E+00    | Leydig_cells   | ATN1         |
| EEF1A15      | 0           | 0.598391322 | 0.954 | 0.923 | 0           | 1.033586132 | Sertoli_cells  | EEF1A1       |
| SERF2        | 0           | 0.598218016 | 0.981 | 0.712 | 0           | 1.377808989 | spermatocyte   | SERF2        |
| CD41         | 0           | 0.598214406 | 0.246 | 0.022 | 0           | 11.18181818 | Leydig_cells   | CD4          |
| TUBB3        | 4.22E-82    | 0.598164384 | 0.411 | 0.24  | 2.59E-77    | 1.71E+00    | Sertoli_cells  | TUBB         |
| TMEM51       | 0           | 0.598007465 | 0.317 | 0.016 | 0           | 19.8125     | VSM_cells      | TMEM51       |
| EIF5A2       | 1.08E-279   | 0.597970348 | 0.562 | 0.45  | 6.64E-275   | 1.25E+00    | spermatid      | EIF5A2       |
| ITGAL        | 3.37E-40    | 0.597907112 | 0.184 | 0.007 | 2.07E-35    | 2.63E+01    | T_cells        | ITGAL        |
| ZBTB32       | 0           | 0.597834614 | 0.645 | 0.139 | 0           | 4.64028777  | spermatocyte   | ZBTB32       |
| ACSS1        | 2.96E-154   | 0.597683922 | 0.273 | 0.087 | 1.81E-149   | 3.14E+00    | Sertoli_cells  | ACSS1        |
| TSC22D32     | 5.85E-128   | 0.597671697 | 0.377 | 0.138 | 3.59E-123   | 2.73E+00    | Leydig_cells   | TSC22D3      |
| MYO1F        | 2.59E-51    | 0.597657739 | 0.205 | 0.039 | 1.59E-46    | 5.26E+00    | macrophages    | MYO1F        |
| LDHA         | 3.51E-45    | 0.597478578 | 0.769 | 0.601 | 2.16E-40    | 1.28E+00    | endotheliocyte | LDHA         |
| MRV11.AS1    | 1.26E-158   | 0.59726183  | 0.356 | 0.235 | 7.73E-154   | 1.51E+00    | spermatid      | MRV11.AS1    |
| ANXA111      | 3.58E-137   | 0.59723866  | 0.448 | 0.1   | 2.19E-132   | 4.48E+00    | VSM_cells      | ANXA11       |
| TUBB         | 1.69E-81    | 0.597218162 | 0.645 | 0.245 | 1.04E-76    | 2.63E+00    | endotheliocyte | TUBB         |
| TMEM53       | 0           | 0.597208087 | 0.515 | 0.279 | 0           | 1.845878136 | spermatid      | TMEM53       |
| MAN1A1       | 0           | 0.597198848 | 0.462 | 0.214 | 0           | 2.158878505 | spermatid      | MAN1A1       |
| ANGPTL41     | 0           | 0.59713218  | 0.371 | 0.023 | 0           | 16.13043478 | PTM_cells      | ANGPTL4      |
| IGFBP51      | 1.29E-181   | 0.596981477 | 0.274 | 0.062 | 7.93E-177   | 4.42E+00    | PTM_cells      | IGFBP5       |
| MRPL36       | 0           | 0.5969288   | 0.878 | 0.432 | 0           | 2.032407407 | spermatocyte   | MRPL36       |
| RAN1         | 0           | 0.596780174 | 0.899 | 0.59  | 0           | 1.523728814 | spermatocyte   | RAN          |
| TBCA         | 7.47E-10    | 0.596472673 | 0.363 | 0.373 | 4.59E-05    | 9.73E-01    | Sertoli_cells  | TBCA         |
| ATP5G21      | 3.40E-14    | 0.59633781  | 0.576 | 0.494 | 2.09E-09    | 1.17E+00    | macrophages    | ATP5G2       |
| TRAPPC3      | 0           | 0.596300763 | 0.885 | 0.404 | 0           | 2.190594059 | spermatocyte   | TRAPPC3      |
| PTRHD1       | 0           | 0.596208779 | 0.855 | 0.333 | 0           | 2.567567568 | spermatocyte   | PTRHD1       |
| NRP1         | 2.23E-288   | 0.596201822 | 0.362 | 0.03  | 1.37E-283   | 1.21E+01    | endotheliocyte | NRP1         |
| S100A43      | 0.006376732 | 0.596142199 | 0.14  | 0.054 | 1           | 2.592592593 | mastocyte      | S100A4       |
| SRC          | 0           | 0.596113037 | 0.231 | 0.016 | 0           | 14.4375     | Sertoli_cells  | SRC          |
| SERINC12     | 1.10E-128   | 0.595968304 | 0.381 | 0.139 | 6.73E-124   | 2.74E+00    | Leydig_cells   | SERINC1      |
| DNAJB1       | 0           | 0.595939689 | 0.976 | 0.6   | 0           | 1.626666667 | spermatocyte   | DNAJB1       |
| ART5         | 0           | 0.595870333 | 0.57  | 0.101 | 0           | 5.643564356 | spermatocyte   | ART5         |
| JUNB5        | 7.00E-34    | 0.595719069 | 0.423 | 0.345 | 4.29E-29    | 1.23E+00    | Sertoli_cells  | JUNB         |
| GFOD1        | 0           | 0.595689402 | 0.308 | 0.018 | 0           | 17.11111111 | endotheliocyte | GFOD1        |
| SERPINE1     | 0           | 0.59563829  | 0.277 | 0.012 | 0           | 23.08333333 | PTM_cells      | SERPINE1     |
| PPM1G        | 0           | 0.595592258 | 0.996 | 0.793 | 0           | 1.255989912 | spermatocyte   | PPM1G        |
| MT.ND4L2     | 8.10E-36    | 0.595453798 | 0.292 | 0.167 | 4.97E-31    | 1.75E+00    | Leydig_cells   | MT.ND4L      |
| DCAF7        | 0           | 0.595438724 | 0.876 | 0.279 | 0           | 3.139784946 | spermatocyte   | DCAF7        |
| TBX18.AS1    | 0           | 0.59538505  | 0.259 | 0.066 | 0           | 3.924242424 | spermatid      | TBX18.AS1    |
| TIFA         | 6.24E-152   | 0.595332181 | 0.305 | 0.04  | 3.83E-147   | 7.63E+00    | endotheliocyte | TIFA         |
| NPC22        | 2.57E-75    | 0.595283046 | 0.605 | 0.439 | 1.58E-70    | 1.38E+00    | Leydig_cells   | NPC2         |
| CCDC37-AS1   | 4.16E-231   | 0.595254683 | 0.378 | 0.221 | 2.55E-226   | 1.71E+00    | spermatid      | CCDC37-AS1   |
| SELM         | 6.62E-80    | 0.595246547 | 0.568 | 0.213 | 4.06E-75    | 2.67E+00    | endotheliocyte | SELM         |
| COX6A1       | 0           | 0.595217467 | 0.935 | 0.541 | 0           | 1.728280961 | spermatocyte   | COX6A1       |
| ITPRIP       | 3.40E-52    | 0.595213935 | 0.325 | 0.106 | 2.08E-47    | 3.07E+00    | endotheliocyte | ITPRIP       |
| CLK1         | 4.33E-18    | 0.595200184 | 0.313 | 0.157 | 2.65E-13    | 1.99E+00    | macrophages    | CLK1         |
| CTNNA1       | 1.87E-67    | 0.595198589 | 0.459 | 0.164 | 1.15E-62    | 2.80E+00    | endotheliocyte | CTNNA1       |
| AZIN1-AS1    | 4.73E-213   | 0.595139151 | 0.38  | 0.245 | 2.90E-208   | 1.55E+00    | spermatid      | AZIN1-AS1    |
| FTLP3        | 1.02E-114   | 0.595007834 | 0.148 | 0.01  | 6.27E-110   | 1.48E+01    | macrophages    | FTLP3        |
| VIT          | 0           | 0.594856075 | 0.269 | 0.02  | 0           | 13.45       | Leydig_cells   | VIT          |
| MAGEH1       | 2.94E-275   | 0.594801599 | 0.232 | 0.039 | 1.80E-270   | 5.95E+00    | Sertoli_cells  | MAGEH1       |
| RAD50        | 0           | 0.594744694 | 0.584 | 0.306 | 0           | 1.908496732 | spermatogonia  | RAD50        |
| ANXA21       | 8.24E-18    | 0.5945943   | 0.471 | 0.295 | 5.05E-13    | 1.60E+00    | macrophages    | ANXA2        |
| VPS29        | 2.93E-278   | 0.594510082 | 0.496 | 0.3   | 1.80E-273   | 1.65E+00    | spermatogonia  | VPS29        |
| EMP23        | 1.19E-93    | 0.594481793 | 0.524 | 0.184 | 7.28E-89    | 2.85E+00    | VSM_cells      | EMP2         |
| ACTR10       | 0           | 0.594481229 | 0.497 | 0.166 | 0           | 2.993975904 | spermatogonia  | ACTR10       |
| GMNN         | 0           | 0.594251715 | 0.836 | 0.254 | 0           | 3.291338583 | spermatocyte   | GMNN         |
| CCDC38       | 0           | 0.59404526  | 0.751 | 0.16  | 0           | 4.69375     | spermatocyte   | CCDC38       |
| RP11.219E7.2 | 0           | 0.59401924  | 0.228 | 0.02  | 0           | 11.4        | spermatid      | RP11.219E7.2 |

|              |             |             |       |       |             |             |                |              |
|--------------|-------------|-------------|-------|-------|-------------|-------------|----------------|--------------|
| RPS231       | 7.72E-40    | 0.594006822 | 0.916 | 0.829 | 4.74E-35    | 1.10E+00    | macrophages    | RPS23        |
| RHOA1        | 1.64E-83    | 0.593975225 | 0.712 | 0.539 | 1.01E-78    | 1.32E+00    | Leydig_cells   | RHOA         |
| COL16A1      | 3.23E-233   | 0.593784898 | 0.398 | 0.109 | 1.98E-228   | 3.65E+00    | PTM_cells      | COL16A1      |
| RP11-389G6.5 | 0           | 0.593735844 | 0.542 | 0.162 | 0           | 3.345679012 | spermatocyte   | RP11-389G6.5 |
| ILF2         | 0           | 0.593707406 | 0.714 | 0.449 | 0           | 1.590200445 | spermatogonia  | ILF2         |
| RHOH         | 1.10E-84    | 0.593605466 | 0.211 | 0.004 | 6.73E-80    | 5.28E+01    | T_cells        | RHOH         |
| TEX264       | 0           | 0.593570978 | 0.775 | 0.312 | 0           | 2.483974359 | spermatocyte   | TEX264       |
| ESF1         | 0           | 0.593548014 | 0.583 | 0.349 | 0           | 1.670487106 | spermatogonia  | ESF1         |
| TMSB4XP4     | 0.000491413 | 0.593403445 | 0.079 | 0.014 | 1           | 5.642857143 | T_cells        | TMSB4XP4     |
| CALCOCO2     | 0           | 0.59339426  | 0.703 | 0.64  | 0           | 1.0984375   | spermatid      | CALCOCO2     |
| OPLAH        | 0           | 0.593346975 | 0.51  | 0.184 | 0           | 2.77173913  | spermatid      | OPLAH        |
| IL18RAP      | 7.40E-41    | 0.593241308 | 0.053 | 0.001 | 4.54E-36    | 5.30E+01    | T_cells        | IL18RAP      |
| CREM         | 0           | 0.593098692 | 0.991 | 0.691 | 0           | 1.434153401 | spermatocyte   | CREM         |
| MDH2         | 0           | 0.593002876 | 0.894 | 0.414 | 0           | 2.15942029  | spermatocyte   | MDH2         |
| PRKAR1A      | 0           | 0.592797538 | 0.964 | 0.54  | 0           | 1.785185185 | spermatocyte   | PRKAR1A      |
| WBP5         | 8.34E-234   | 0.592688511 | 0.382 | 0.086 | 5.12E-229   | 4.44E+00    | Leydig_cells   | WBP5         |
| RBM36        | 0.000754585 | 0.592609245 | 0.421 | 0.228 | 1           | 1.846491228 | T_cells        | RBM3         |
| MDC1         | 0           | 0.592578633 | 0.418 | 0.141 | 0           | 2.964539007 | spermatogonia  | MDC1         |
| NOP10        | 5.46E-41    | 0.592554393 | 0.235 | 0.136 | 3.35E-36    | 1.73E+00    | Sertoli_cells  | NOP10        |
| SRSF11       | 0           | 0.592423576 | 0.711 | 0.514 | 0           | 1.383268482 | spermatogonia  | SRSF11       |
| TNFAIP6      | 0           | 0.59239038  | 0.489 | 0.252 | 0           | 1.94047619  | spermatid      | TNFAIP6      |
| CD993        | 1.78E-118   | 0.592379967 | 0.626 | 0.189 | 1.09E-113   | 3.31E+00    | VSM_cells      | CD99         |
| SMCHD1       | 8.02E-208   | 0.592253904 | 0.503 | 0.335 | 4.92E-203   | 1.50E+00    | spermatogonia  | SMCHD1       |
| PTGDR        | 1.37E-297   | 0.592094113 | 0.211 | 0.001 | 8.40E-293   | 2.11E+02    | T_cells        | PTGDR        |
| C5orf52      | 0           | 0.592033458 | 0.526 | 0.289 | 0           | 1.820069204 | spermatid      | C5orf52      |
| SNAPC1       | 0           | 0.591772084 | 0.522 | 0.305 | 0           | 1.71147541  | spermatogonia  | SNAPC1       |
| TPT15        | 1.19E-247   | 0.59174058  | 0.901 | 0.856 | 7.29E-243   | 1.05E+00    | Sertoli_cells  | TPT1         |
| SYTL2        | 2.23E-08    | 0.591721828 | 0.211 | 0.04  | 0.001368334 | 5.275       | T_cells        | SYTL2        |
| CMIP         | 6.78E-51    | 0.59167535  | 0.457 | 0.19  | 4.16E-46    | 2.41E+00    | endotheliocyte | CMIP         |
| ODF3L1       | 0           | 0.591454752 | 0.581 | 0.117 | 0           | 4.965811966 | spermatocyte   | ODF3L1       |
| IDE          | 0           | 0.591333343 | 0.762 | 0.18  | 0           | 4.233333333 | spermatocyte   | IDE          |
| DDIT4        | 1.65E-87    | 0.591317638 | 0.362 | 0.083 | 1.01E-82    | 4.36E+00    | endotheliocyte | DDIT4        |
| CNN1         | 1.95E-51    | 0.591261667 | 0.628 | 0.346 | 1.20E-46    | 1.82E+00    | VSM_cells      | CNN1         |
| NDNF         | 0           | 0.591252212 | 0.447 | 0.15  | 0           | 2.98        | spermatid      | NDNF         |
| DNAL4        | 0           | 0.591238288 | 0.889 | 0.312 | 0           | 2.849358974 | spermatocyte   | DNAL4        |
| PGAM1        | 1.06E-201   | 0.591137958 | 0.56  | 0.227 | 6.50E-197   | 2.47E+00    | PTM_cells      | PGAM1        |
| HMOX2        | 0           | 0.590973177 | 0.706 | 0.585 | 0           | 1.206837607 | spermatid      | HMOX2        |
| RCN21        | 0.000785453 | 0.590936282 | 0.56  | 0.392 | 1           | 1.428571429 | mastocyte      | RCN2         |
| INPP4B       | 0           | 0.590822543 | 0.498 | 0.161 | 0           | 3.093167702 | spermatid      | INPP4B       |
| RASSF2       | 4.07E-84    | 0.590740192 | 0.267 | 0.098 | 2.50E-79    | 2.72E+00    | Leydig_cells   | RASSF2       |
| ARHGAP301    | 1.78E-33    | 0.59072607  | 0.158 | 0.006 | 1.09E-28    | 2.63E+01    | T_cells        | ARHGAP30     |
| HCAR2        | 3.01E-67    | 0.590628578 | 0.185 | 0.025 | 1.85E-62    | 7.40E+00    | macrophages    | HCAR2        |
| RNF148       | 0           | 0.590578942 | 0.482 | 0.234 | 0           | 2.05982906  | spermatid      | RNF148       |
| RPL301       | 1.84E-37    | 0.590522353 | 0.926 | 0.878 | 1.13E-32    | 1.05E+00    | macrophages    | RPL30        |
| GUCA1A       | 0           | 0.590333318 | 0.432 | 0.089 | 0           | 4.853932584 | spermatid      | GUCA1A       |
| RPL191       | 5.50E-124   | 0.590302932 | 0.906 | 0.836 | 3.38E-119   | 1.08E+00    | Leydig_cells   | RPL19        |
| CDK5RAP3     | 0           | 0.590283754 | 0.762 | 0.251 | 0           | 3.035856574 | spermatocyte   | CDK5RAP3     |
| RPS113       | 2.49E-204   | 0.59020762  | 0.908 | 0.818 | 1.53E-199   | 1.11E+00    | PTM_cells      | RPS11        |
| RBM44        | 0           | 0.58999452  | 0.432 | 0.101 | 0           | 4.277227723 | spermatogonia  | RBM44        |
| C7orf50      | 3.93E-49    | 0.589915349 | 0.239 | 0.132 | 2.41E-44    | 1.81E+00    | Sertoli_cells  | C7orf50      |
| SIN3B        | 2.61E-65    | 0.589900241 | 0.329 | 0.161 | 1.60E-60    | 2.04E+00    | Leydig_cells   | SIN3B        |
| FAM26F       | 2.63E-34    | 0.589645556 | 0.259 | 0.078 | 1.61E-29    | 3.32E+00    | macrophages    | FAM26F       |
| HMGB11       | 1.38E-71    | 0.589632343 | 0.859 | 0.548 | 8.47E-67    | 1.57E+00    | endotheliocyte | HMGB1        |
| LEPR1        | 0           | 0.589628503 | 0.234 | 0.024 | 0           | 9.75        | Leydig_cells   | LEPR         |
| APOBEC3C1    | 2.28E-08    | 0.589525989 | 0.263 | 0.057 | 0.001399901 | 4.614035088 | T_cells        | APOBEC3C     |
| SRSF10       | 0           | 0.589485021 | 0.675 | 0.445 | 0           | 1.516853933 | spermatogonia  | SRSF10       |
| GSTO2        | 0           | 0.589427685 | 0.539 | 0.325 | 0           | 1.658461538 | spermatid      | GSTO2        |
| ZNF345       | 0           | 0.589355984 | 0.483 | 0.192 | 0           | 2.515625    | spermatid      | ZNF345       |
| LINC01364    | 0           | 0.589340654 | 0.458 | 0.127 | 0           | 3.606299213 | spermatid      | LINC01364    |
| HSPA5        | 2.39E-192   | 0.589327926 | 0.714 | 0.586 | 1.47E-187   | 1.22E+00    | spermatogonia  | HSPA5        |
| LY86         | 7.08E-236   | 0.589258471 | 0.202 | 0.008 | 4.34E-231   | 2.53E+01    | macrophages    | LY86         |
| RUNX1T1      | 2.56E-132   | 0.589254256 | 0.387 | 0.071 | 1.57E-127   | 5.45E+00    | endotheliocyte | RUNX1T1      |
| PXYLP1       | 0           | 0.589195356 | 0.777 | 0.228 | 0           | 3.407894737 | spermatocyte   | PXYLP1       |
| IFI162       | 9.18E-273   | 0.589127113 | 0.371 | 0.073 | 5.63E-268   | 5.08E+00    | Leydig_cells   | IFI16        |
| FERMT21      | 1.27E-52    | 0.588950308 | 0.474 | 0.227 | 7.77E-48    | 2.09E+00    | VSM_cells      | FERMT2       |
| HNRNPA11     | 1.81E-17    | 0.588932456 | 0.673 | 0.605 | 1.11E-12    | 1.11E+00    | macrophages    | HNRNPA1      |
| FGFBP2       | 2.84E-20    | 0.588900452 | 0.132 | 0.007 | 1.74E-15    | 1.89E+01    | T_cells        | FGFBP2       |
| DCBLD2       | 3.09E-161   | 0.588886635 | 0.246 | 0.07  | 1.89E-156   | 3.51E+00    | Sertoli_cells  | DCBLD2       |
| AKR1C3       | 4.06E-214   | 0.588742477 | 0.382 | 0.044 | 2.49E-209   | 8.68E+00    | endotheliocyte | AKR1C3       |
| TUBA1A       | 7.50E-91    | 0.588696796 | 0.608 | 0.198 | 4.60E-86    | 3.07E+00    | endotheliocyte | TUBA1A       |
| MYC          | 2.63E-150   | 0.588664301 | 0.407 | 0.066 | 1.61E-145   | 6.17E+00    | endotheliocyte | MYC          |
| SERTAD11     | 3.17E-26    | 0.588584167 | 0.232 | 0.076 | 1.95E-21    | 3.05E+00    | macrophages    | SERTAD1      |
| ADI11        | 1.83E-87    | 0.588525335 | 0.425 | 0.133 | 1.12E-82    | 3.20E+00    | VSM_cells      | ADI1         |
| ZBTB7A       | 6.27E-06    | 0.588359683 | 0.263 | 0.08  | 0.384476592 | 3.2875      | T_cells        | ZBTB7A       |
| SOBP         | 0           | 0.588317739 | 0.757 | 0.186 | 0           | 4.069892473 | spermatocyte   | SOBP         |

|              |             |             |       |       |           |             |                |              |
|--------------|-------------|-------------|-------|-------|-----------|-------------|----------------|--------------|
| ARHGAP31     | 0           | 0.588195161 | 0.342 | 0.014 | 0         | 24.42857143 | endotheliocyte | ARHGAP31     |
| ORMDL3       | 0           | 0.588052896 | 0.537 | 0.257 | 0         | 2.089494163 | spermatid      | ORMDL3       |
| COL15A1      | 1.89E-43    | 0.588052877 | 0.355 | 0.127 | 1.16E-38  | 2.80E+00    | endotheliocyte | COL15A1      |
| FAM46A       | 1.65E-27    | 0.587982158 | 0.215 | 0.064 | 1.01E-22  | 3.36E+00    | macrophages    | FAM46A       |
| RPL132       | 2.13E-214   | 0.587976987 | 0.988 | 0.955 | 1.30E-209 | 1.03E+00    | PTM_cells      | RPL13        |
| LEPROT2      | 4.72E-244   | 0.587890783 | 0.495 | 0.157 | 2.90E-239 | 3.15E+00    | PTM_cells      | LEPROT       |
| RPL6P271     | 2.03E-12    | 0.587883844 | 0.218 | 0.165 | 1.25E-07  | 1.32E+00    | Leydig_cells   | RPL6P27      |
| ELL          | 0           | 0.587776282 | 0.517 | 0.22  | 0         | 2.35        | spermatid      | ELL          |
| PIP5K1B      | 0           | 0.587727892 | 0.717 | 0.123 | 0         | 5.829268293 | spermatocyte   | PIP5K1B      |
| DDX1         | 0           | 0.587667335 | 0.55  | 0.257 | 0         | 2.140077821 | spermatogonia  | DDX1         |
| NDUFS5       | 2.88E-121   | 0.587600859 | 0.644 | 0.44  | 1.77E-116 | 1.46E+00    | PTM_cells      | NDUFS5       |
| ELF12        | 0.000362413 | 0.587560306 | 0.26  | 0.112 | 1         | 2.321428571 | mastocyte      | ELF1         |
| HEXIM12      | 0           | 0.587514407 | 0.432 | 0.088 | 0         | 4.909090909 | PTM_cells      | HEXIM1       |
| CDC422       | 4.62E-15    | 0.587432503 | 0.539 | 0.416 | 2.84E-10  | 1.30E+00    | macrophages    | CDC42        |
| ACTG12       | 0.001330781 | 0.587342595 | 0.868 | 0.795 | 1         | 1.091823899 | T_cells        | ACTG1        |
| COBLL11      | 0           | 0.587264668 | 0.296 | 0.019 | 0         | 15.57894737 | VSM_cells      | COBLL1       |
| RASSF5       | 4.36E-100   | 0.58720787  | 0.158 | 0.013 | 2.67E-95  | 1.22E+01    | macrophages    | RASSF5       |
| LARP7        | 0           | 0.586996562 | 0.524 | 0.191 | 0         | 2.743455497 | spermatogonia  | LARP7        |
| BSG          | 0           | 0.586988758 | 0.804 | 0.653 | 0         | 1.231240429 | spermatogonia  | BSG          |
| VCP          | 0           | 0.586859333 | 0.669 | 0.389 | 0         | 1.719794344 | spermatogonia  | VCP          |
| LINC00911    | 0           | 0.586655797 | 0.531 | 0.108 | 0         | 4.916666667 | spermatocyte   | LINC00911    |
| CLIP4        | 0           | 0.586583558 | 0.484 | 0.197 | 0         | 2.456852792 | spermatid      | CLIP4        |
| TPM41        | 2.40E-96    | 0.586562749 | 0.457 | 0.228 | 1.47E-91  | 2.00E+00    | Leydig_cells   | TPM4         |
| TSTD1        | 2.22E-15    | 0.586537728 | 0.238 | 0.188 | 1.36E-10  | 1.27E+00    | Sertoli_cells  | TSTD1        |
| GAGE1        | 0           | 0.586526036 | 0.267 | 0.011 | 0         | 24.27272727 | spermatogonia  | GAGE1        |
| C17orf80     | 0           | 0.586432109 | 0.877 | 0.3   | 0         | 2.923333333 | spermatocyte   | C17orf80     |
| HACD3        | 0           | 0.586338028 | 0.643 | 0.443 | 0         | 1.451467269 | spermatogonia  | HACD3        |
| COX7B1       | 3.01E-29    | 0.586162215 | 0.238 | 0.154 | 1.84E-24  | 1.55E+00    | Sertoli_cells  | COX7B        |
| CSRNP12      | 1.66E-46    | 0.586121242 | 0.32  | 0.178 | 1.02E-41  | 1.80E+00    | Leydig_cells   | CSRNP1       |
| TM2D1        | 0           | 0.586042977 | 0.485 | 0.163 | 0         | 2.975460123 | spermatogonia  | TM2D1        |
| DDX17        | 0           | 0.586041096 | 0.665 | 0.458 | 0         | 1.451965066 | spermatogonia  | DDX17        |
| RPS4Y14      | 4.91E-80    | 0.585875903 | 0.45  | 0.263 | 3.01E-75  | 1.71E+00    | Sertoli_cells  | RPS4Y1       |
| GNB1         | 0           | 0.585870751 | 0.583 | 0.304 | 0         | 1.917763158 | spermatogonia  | GNB1         |
| TCF21        | 0           | 0.585781497 | 0.354 | 0.014 | 0         | 25.28571429 | PTM_cells      | TCF21        |
| VAMP2        | 0           | 0.585752095 | 0.599 | 0.28  | 0         | 2.139285714 | spermatogonia  | VAMP2        |
| FSTL3        | 3.35E-268   | 0.585751658 | 0.212 | 0.034 | 2.05E-263 | 6.24E+00    | Sertoli_cells  | FSTL3        |
| DDX20        | 0           | 0.585726125 | 0.745 | 0.553 | 0         | 1.347197107 | spermatid      | DDX20        |
| IQUB         | 0           | 0.585529872 | 0.913 | 0.351 | 0         | 2.601139601 | spermatocyte   | IQUB         |
| SH2B3        | 4.95E-14    | 0.585478182 | 0.263 | 0.138 | 3.04E-09  | 1.91E+00    | macrophages    | SH2B3        |
| SUSD5        | 0           | 0.58536214  | 0.3   | 0.015 | 0         | 20          | VSM_cells      | SUSD5        |
| VAMP51       | 0           | 0.58528425  | 0.408 | 0.058 | 0         | 7.034482759 | PTM_cells      | VAMP5        |
| PEA151       | 1.94E-10    | 0.585283348 | 0.368 | 0.387 | 1.19E-05  | 9.51E-01    | Sertoli_cells  | PEA15        |
| FKBP5        | 3.66E-80    | 0.585157523 | 0.283 | 0.137 | 2.24E-75  | 2.07E+00    | Sertoli_cells  | FKBP5        |
| CRIM1        | 1.02E-167   | 0.585116789 | 0.352 | 0.047 | 6.27E-163 | 7.49E+00    | endotheliocyte | CRIM1        |
| RNF213       | 1.01E-37    | 0.585003297 | 0.212 | 0.051 | 6.23E-33  | 4.16E+00    | macrophages    | RNF213       |
| MGLL         | 5.13E-148   | 0.584986312 | 0.395 | 0.066 | 3.15E-143 | 5.98E+00    | endotheliocyte | MGLL         |
| ITPKB        | 1.52E-200   | 0.584943446 | 0.295 | 0.029 | 9.32E-196 | 1.02E+01    | endotheliocyte | ITPKB        |
| FAM49B1      | 5.51E-39    | 0.584871297 | 0.247 | 0.151 | 3.38E-34  | 1.64E+00    | Sertoli_cells  | FAM49B       |
| NNMT         | 0           | 0.584796526 | 0.248 | 0.009 | 0         | 27.55555556 | endotheliocyte | NNMT         |
| VCAN         | 1.84E-113   | 0.584742955 | 0.241 | 0.066 | 1.13E-108 | 3.65E+00    | Leydig_cells   | VCAN         |
| GLG1         | 0           | 0.584674714 | 0.608 | 0.365 | 0         | 1.665753425 | spermatogonia  | GLG1         |
| ATF42        | 5.53E-51    | 0.584659606 | 0.494 | 0.353 | 3.39E-46  | 1.40E+00    | Leydig_cells   | ATF4         |
| DHX9         | 0           | 0.584618768 | 0.576 | 0.257 | 0         | 2.241245136 | spermatogonia  | DHX9         |
| MAGED23      | 1.10E-127   | 0.584340657 | 0.33  | 0.128 | 6.75E-123 | 2.58E+00    | Sertoli_cells  | MAGED2       |
| SPATA33      | 0           | 0.584314873 | 0.824 | 0.686 | 0         | 1.201166181 | spermatid      | SPATA33      |
| NCKAP5L      | 0           | 0.584300983 | 0.363 | 0.045 | 0         | 8.066666667 | PTM_cells      | NCKAP5L      |
| AC016739.2   | 8.25E-22    | 0.584253231 | 0.205 | 0.07  | 5.06E-17  | 2.93E+00    | macrophages    | AC016739.2   |
| IFIT2        | 0           | 0.584238208 | 0.246 | 0.01  | 0         | 24.6        | endotheliocyte | IFIT2        |
| RPL363       | 3.94E-66    | 0.584154096 | 0.848 | 0.7   | 2.42E-61  | 1.21E+00    | VSM_cells      | RPL36        |
| TAX1BP1      | 0           | 0.584091817 | 0.718 | 0.515 | 0         | 1.394174757 | spermatogonia  | TAX1BP1      |
| DMD          | 0           | 0.584062933 | 0.386 | 0.078 | 0         | 4.948717949 | PTM_cells      | DMD          |
| NPC2         | 0           | 0.58385438  | 0.64  | 0.392 | 0         | 1.632653061 | spermatogonia  | NPC2         |
| PLSCR11      | 2.98E-45    | 0.583830712 | 0.222 | 0.048 | 1.83E-40  | 4.63E+00    | macrophages    | PLSCR1       |
| ITGB3BP      | 0           | 0.583825942 | 0.797 | 0.277 | 0         | 2.877256318 | spermatocyte   | ITGB3BP      |
| NFKB2        | 8.09E-47    | 0.5838062   | 0.195 | 0.037 | 4.96E-42  | 5.27E+00    | macrophages    | NFKB2        |
| CLMP         | 0           | 0.583736355 | 0.342 | 0.011 | 0         | 31.09090909 | PTM_cells      | CLMP         |
| APOBEC3G     | 2.73E-27    | 0.583726538 | 0.238 | 0.162 | 1.67E-22  | 1.47E+00    | Sertoli_cells  | APOBEC3G     |
| CRYZL1       | 0           | 0.583724081 | 0.777 | 0.228 | 0         | 3.407894737 | spermatocyte   | CRYZL1       |
| MRPS6        | 2.61E-14    | 0.583698693 | 0.347 | 0.332 | 1.60E-09  | 1.05E+00    | Sertoli_cells  | MRPS6        |
| HLA-E2       | 1.11E-153   | 0.58365248  | 0.425 | 0.083 | 6.79E-149 | 5.12E+00    | VSM_cells      | HLA-E        |
| ORMDL1       | 0           | 0.583610661 | 0.563 | 0.324 | 0         | 1.737654321 | spermatogonia  | ORMDL1       |
| FOSL2        | 8.06E-157   | 0.583592025 | 0.352 | 0.051 | 4.95E-152 | 6.90E+00    | endotheliocyte | FOSL2        |
| PRMT1        | 0           | 0.583485569 | 0.546 | 0.142 | 0         | 3.845070423 | spermatogonia  | PRMT1        |
| GRASP        | 0           | 0.583463133 | 0.34  | 0.018 | 0         | 18.88888889 | endotheliocyte | GRASP        |
| RP11-498B4.5 | 7.18E-222   | 0.583428368 | 0.348 | 0.194 | 4.41E-217 | 1.79E+00    | spermatid      | RP11-498B4.5 |

|           |             |             |       |       |             |             |                |           |
|-----------|-------------|-------------|-------|-------|-------------|-------------|----------------|-----------|
| ACADM     | 0           | 0.583390805 | 0.53  | 0.285 | 0           | 1.859649123 | spermatogonia  | ACADM     |
| TCEA1     | 0           | 0.583378418 | 0.57  | 0.266 | 0           | 2.142857143 | spermatogonia  | TCEA1     |
| MFAP41    | 4.22E-150   | 0.583320316 | 0.33  | 0.051 | 2.59E-145   | 6.47E+00    | VSM_cells      | MFAP4     |
| LSM5      | 0           | 0.583154589 | 0.436 | 0.146 | 0           | 2.98630137  | spermatogonia  | LSM5      |
| GPC1      | 6.66E-282   | 0.583121013 | 0.227 | 0.036 | 4.09E-277   | 6.31E+00    | Sertoli_cells  | GPC1      |
| HSPG21    | 1.90E-185   | 0.583089445 | 0.372 | 0.055 | 1.16E-180   | 6.76E+00    | VSM_cells      | HSPG2     |
| CDCA8     | 0           | 0.583024425 | 0.429 | 0.084 | 0           | 5.107142857 | spermatogonia  | CDCA8     |
| CLTB      | 5.03E-53    | 0.582915852 | 0.252 | 0.136 | 3.09E-48    | 1.85E+00    | Sertoli_cells  | CLTB      |
| BST21     | 1.09E-37    | 0.582841588 | 0.35  | 0.112 | 6.67E-33    | 3.13E+00    | macrophages    | BST2      |
| PPP3CA    | 3.36E-141   | 0.582772411 | 0.414 | 0.075 | 2.06E-136   | 5.52E+00    | endotheliocyte | PPP3CA    |
| KDM2A     | 0           | 0.582743753 | 0.524 | 0.223 | 0           | 2.349775785 | spermatogonia  | KDM2A     |
| LIN7A     | 0           | 0.582571213 | 0.785 | 0.191 | 0           | 4.109947644 | spermatocyte   | LIN7A     |
| TJP1      | 0           | 0.582486043 | 0.472 | 0.224 | 0           | 2.107142857 | spermatogonia  | TJP1      |
| LINC01227 | 0           | 0.582473445 | 0.412 | 0.058 | 0           | 7.103448276 | spermatid      | LINC01227 |
| GLRX1     | 1.11E-11    | 0.582424225 | 0.184 | 0.023 | 6.80E-07    | 8.00E+00    | T_cells        | GLRX      |
| MBD1      | 0           | 0.582348158 | 0.815 | 0.298 | 0           | 2.734899329 | spermatocyte   | MBD1      |
| LINC00494 | 0           | 0.582292123 | 0.424 | 0.068 | 0           | 6.235294118 | spermatid      | LINC00494 |
| TSPAN41   | 7.38E-264   | 0.582108999 | 0.338 | 0.064 | 4.53E-259   | 5.28E+00    | Leydig_cells   | TSPAN4    |
| RWDD2A    | 0           | 0.581941746 | 0.741 | 0.16  | 0           | 4.63125     | spermatocyte   | RWDD2A    |
| BOD1L2    | 0           | 0.581907366 | 0.995 | 0.836 | 0           | 1.190191388 | spermatocyte   | BOD1L2    |
| RANBP9    | 0           | 0.581778152 | 0.887 | 0.419 | 0           | 2.116945107 | spermatocyte   | RANBP9    |
| TMEM247   | 0           | 0.581767774 | 0.631 | 0.434 | 0           | 1.453917051 | spermatid      | TMEM247   |
| OARD1     | 0           | 0.581565362 | 0.661 | 0.475 | 0           | 1.391578947 | spermatogonia  | OARD1     |
| FAM96B    | 0           | 0.581488886 | 0.601 | 0.395 | 0           | 1.521518987 | spermatogonia  | FAM96B    |
| DPY19L2   | 1.05E-06    | 0.581433264 | 0.66  | 0.412 | 0.064382308 | 1.601941748 | mastocyte      | DPY19L2   |
| FIP1L1    | 0           | 0.581314937 | 0.565 | 0.253 | 0           | 2.233201581 | spermatogonia  | FIP1L1    |
| RPS134    | 2.12E-05    | 0.581303839 | 0.868 | 0.841 | 1           | 1.032104637 | T_cells        | RPS13     |
| LIN7B     | 0           | 0.581221959 | 0.241 | 0.024 | 0           | 10.04166667 | spermatogonia  | LIN7B     |
| DNAJC27   | 0           | 0.581199596 | 0.805 | 0.26  | 0           | 3.096153846 | spermatocyte   | DNAJC27   |
| ACTR6     | 0           | 0.581157221 | 0.845 | 0.295 | 0           | 2.86440678  | spermatocyte   | ACTR6     |
| LPAR2     | 0           | 0.581080589 | 0.224 | 0.013 | 0           | 17.23076923 | Sertoli_cells  | LPAR2     |
| ITM2A2    | 0           | 0.58095668  | 0.453 | 0.059 | 0           | 7.677966102 | PTM_cells      | ITM2A     |
| DDAH22    | 3.29E-70    | 0.580858394 | 0.452 | 0.171 | 2.02E-65    | 2.64E+00    | VSM_cells      | DDAH2     |
| SDHB      | 0           | 0.580713384 | 0.898 | 0.362 | 0           | 2.480662983 | spermatocyte   | SDHB      |
| IGFBP42   | 0           | 0.580710955 | 0.409 | 0.071 | 0           | 5.76056338  | PTM_cells      | IGFBP4    |
| CBX6      | 2.47E-185   | 0.580710404 | 0.289 | 0.064 | 1.51E-180   | 4.52E+00    | Leydig_cells   | CBX6      |
| PLIN21    | 7.60E-146   | 0.580705289 | 0.247 | 0.075 | 4.66E-141   | 3.29E+00    | Sertoli_cells  | PLIN2     |
| PSME14    | 2.41E-134   | 0.5806671   | 0.427 | 0.092 | 1.48E-129   | 4.64E+00    | VSM_cells      | PSME1     |
| MSTO1     | 0           | 0.580583203 | 0.52  | 0.306 | 0           | 1.699346405 | spermatid      | MSTO1     |
| MT-ND45   | 1.94E-20    | 0.580485225 | 0.48  | 0.415 | 1.19E-15    | 1.16E+00    | Sertoli_cells  | MT-ND4    |
| FNBP1     | 2.70E-21    | 0.580356927 | 0.276 | 0.114 | 1.66E-16    | 2.42E+00    | macrophages    | FNBP1     |
| RAP1A     | 0.008084213 | 0.580194077 | 0.289 | 0.168 | 1           | 1.720238095 | T_cells        | RAP1A     |
| CSF3      | 0           | 0.580136035 | 0.176 | 0.004 | 0           | 44          | endotheliocyte | CSF3      |
| HAGH      | 0           | 0.580017574 | 0.903 | 0.411 | 0           | 2.197080292 | spermatocyte   | HAGH      |
| NOP56     | 0           | 0.579839423 | 0.503 | 0.235 | 0           | 2.140425532 | spermatogonia  | NOP56     |
| PKP4      | 2.97E-37    | 0.579597052 | 0.412 | 0.191 | 1.82E-32    | 2.16E+00    | endotheliocyte | PKP4      |
| SNX10     | 1.67E-64    | 0.579549802 | 0.209 | 0.032 | 1.02E-59    | 6.53E+00    | macrophages    | SNX10     |
| DHRS71    | 1.44E-10    | 0.579530718 | 0.289 | 0.057 | 8.84E-06    | 5.07E+00    | T_cells        | DHRS7     |
| RPL292    | 1.44E-199   | 0.579385465 | 0.916 | 0.844 | 8.81E-195   | 1.09E+00    | PTM_cells      | RPL29     |
| TACC13    | 4.74E-207   | 0.579359408 | 0.534 | 0.194 | 2.91E-202   | 2.75E+00    | PTM_cells      | TACC1     |
| RPL6P27   | 5.84E-09    | 0.579348969 | 0.266 | 0.166 | 0.000358105 | 1.602409639 | macrophages    | RPL6P27   |
| GPX3      | 2.09E-142   | 0.579348798 | 0.281 | 0.04  | 1.28E-137   | 7.03E+00    | VSM_cells      | GPX3      |
| USPL1     | 0           | 0.579197317 | 0.503 | 0.228 | 0           | 2.206140351 | spermatid      | USPL1     |
| NTRK2     | 0           | 0.579196426 | 0.259 | 0.026 | 0           | 9.961538462 | Leydig_cells   | NTRK2     |
| PGD       | 1.68E-43    | 0.579184537 | 0.292 | 0.191 | 1.03E-38    | 1.53E+00    | Sertoli_cells  | PGD       |
| ABHD8     | 0           | 0.579068946 | 0.835 | 0.241 | 0           | 3.46473029  | spermatocyte   | ABHD8     |
| CCT8L2    | 0           | 0.579021557 | 0.473 | 0.156 | 0           | 3.032051282 | spermatid      | CCT8L2    |
| MIDN5     | 6.91E-34    | 0.578925439 | 0.283 | 0.194 | 4.24E-29    | 1.46E+00    | Sertoli_cells  | MIDN      |
| WSB1      | 2.96E-39    | 0.57885034  | 0.635 | 0.423 | 1.81E-34    | 1.50E+00    | endotheliocyte | WSB1      |
| SPON2     | 0           | 0.578818144 | 0.203 | 0.012 | 0           | 16.91666667 | Leydig_cells   | SPON2     |
| REC114    | 0           | 0.578813194 | 0.875 | 0.3   | 0           | 2.916666667 | spermatocyte   | REC114    |
| DDX43     | 0           | 0.578665149 | 0.48  | 0.166 | 0           | 2.891566265 | spermatogonia  | DDX43     |
| BOC       | 0           | 0.578562081 | 0.266 | 0.027 | 0           | 9.851851852 | Leydig_cells   | BOC       |
| OVOS21    | 0.002386217 | 0.578546697 | 0.48  | 0.316 | 1           | 1.518987342 | mastocyte      | OVOS2     |
| MRC21     | 1.14E-246   | 0.578544671 | 0.482 | 0.143 | 7.02E-242   | 3.37E+00    | PTM_cells      | MRC2      |
| ZMYND8    | 5.61E-122   | 0.578527709 | 0.264 | 0.096 | 3.44E-117   | 2.75E+00    | Sertoli_cells  | ZMYND8    |
| COX6C     | 0           | 0.578350493 | 0.982 | 0.746 | 0           | 1.316353887 | spermatocyte   | COX6C     |
| TRAFD1    | 0           | 0.578265909 | 0.409 | 0.085 | 0           | 4.811764706 | spermatogonia  | TRAFD1    |
| RPL310    | 1.24E-06    | 0.578252736 | 0.947 | 0.924 | 0.076331471 | 1.024891775 | T_cells        | RPL3      |
| SERPING1  | 1.04E-126   | 0.578134436 | 0.499 | 0.112 | 6.36E-122   | 4.46E+00    | endotheliocyte | SERPING1  |
| C4orf22   | 0           | 0.578058544 | 0.795 | 0.2   | 0           | 3.975       | spermatocyte   | C4orf22   |
| BLZF1     | 0           | 0.578047592 | 0.828 | 0.262 | 0           | 3.160305344 | spermatocyte   | BLZF1     |
| DDIT43    | 1.12E-79    | 0.577974407 | 0.326 | 0.083 | 6.90E-75    | 3.93E+00    | VSM_cells      | DDIT4     |
| LAMB21    | 1.80E-285   | 0.577954207 | 0.381 | 0.081 | 1.10E-280   | 4.70E+00    | PTM_cells      | LAMB2     |
| FAM53C    | 0           | 0.577850514 | 0.634 | 0.418 | 0           | 1.516746411 | spermatid      | FAM53C    |

|           |             |             |       |       |           |             |                |          |
|-----------|-------------|-------------|-------|-------|-----------|-------------|----------------|----------|
| EZR1      | 1.02E-86    | 0.577787922 | 0.46  | 0.24  | 6.23E-82  | 1.92E+00    | Leydig_cells   | EZR      |
| RPS54     | 0.000845721 | 0.577773245 | 0.816 | 0.818 | 1         | 0.997555012 | T_cells        | RPS5     |
| C11orf94  | 0           | 0.577737328 | 0.461 | 0.234 | 0         | 1.97008547  | spermatid      | C11orf94 |
| FUCA2     | 1.03E-249   | 0.577719167 | 0.292 | 0.052 | 6.32E-245 | 5.62E+00    | Leydig_cells   | FUCA2    |
| STAT32    | 4.34E-38    | 0.577642331 | 0.463 | 0.264 | 2.66E-33  | 1.75E+00    | VSM_cells      | STAT3    |
| ACOT13    | 7.48E-228   | 0.577638647 | 0.62  | 0.562 | 4.59E-223 | 1.10E+00    | spermatid      | ACOT13   |
| USP11     | 2.59E-166   | 0.57749134  | 0.326 | 0.187 | 1.59E-161 | 1.74E+00    | spermatogonia  | USP11    |
| PHF2      | 0           | 0.577233039 | 0.444 | 0.096 | 0         | 4.625       | spermatid      | PHF2     |
| PLP2      | 3.83E-125   | 0.577211707 | 0.387 | 0.085 | 2.35E-120 | 4.55E+00    | VSM_cells      | PLP2     |
| C2orf16   | 0           | 0.577204706 | 0.368 | 0.127 | 0         | 2.897637795 | spermatid      | C2orf16  |
| BBX       | 0           | 0.577180053 | 0.727 | 0.569 | 0         | 1.277680141 | spermatid      | BBX      |
| MAGI1     | 0           | 0.577145398 | 0.79  | 0.183 | 0         | 4.316939891 | spermatocyte   | MAGI1    |
| FDFT1     | 0           | 0.577112718 | 0.93  | 0.437 | 0         | 2.128146453 | spermatocyte   | FDFT1    |
| HLA-F     | 3.61E-172   | 0.577056238 | 0.367 | 0.053 | 2.22E-167 | 6.92E+00    | endotheliocyte | HLA-F    |
| RYK       | 0           | 0.577054277 | 0.437 | 0.154 | 0         | 2.837662338 | spermatogonia  | RYK      |
| PLCD1     | 5.61E-291   | 0.577043987 | 0.207 | 0.029 | 3.44E-286 | 7.14E+00    | Sertoli_cells  | PLCD1    |
| MT-CO11   | 4.73E-50    | 0.576980354 | 0.739 | 0.449 | 2.90E-45  | 1.65E+00    | endotheliocyte | MT-CO1   |
| C15orf48  | 0           | 0.576926202 | 0.897 | 0.405 | 0         | 2.214814815 | spermatocyte   | C15orf48 |
| DPYSL2    | 1.69E-213   | 0.576919156 | 0.35  | 0.081 | 1.04E-208 | 4.32E+00    | Leydig_cells   | DPYSL2   |
| PDCD5     | 0           | 0.576867819 | 0.743 | 0.563 | 0         | 1.319715808 | spermatogonia  | PDCD5    |
| HSPA9     | 2.30E-43    | 0.576819496 | 0.326 | 0.223 | 1.41E-38  | 1.46E+00    | Sertoli_cells  | HSPA9    |
| CINP      | 0           | 0.57676965  | 0.776 | 0.223 | 0         | 3.479820628 | spermatocyte   | CINP     |
| TSC22D33  | 4.81E-244   | 0.576643144 | 0.454 | 0.132 | 2.95E-239 | 3.44E+00    | PTM_cells      | TSC22D3  |
| DTD1      | 0           | 0.576488417 | 0.505 | 0.234 | 0         | 2.158119658 | spermatogonia  | DTD1     |
| CCDC187   | 0           | 0.576481997 | 0.401 | 0.066 | 0         | 6.075757576 | spermatid      | CCDC187  |
| HAGLR     | 0           | 0.576427733 | 0.91  | 0.351 | 0         | 2.592592593 | spermatocyte   | HAGLR    |
| FSCB      | 0           | 0.576418415 | 0.536 | 0.214 | 0         | 2.504672897 | spermatid      | FSCB     |
| TIMP13    | 9.03E-152   | 0.576358919 | 0.397 | 0.153 | 5.54E-147 | 2.59E+00    | Sertoli_cells  | TIMP1    |
| RDX       | 0           | 0.576294869 | 0.52  | 0.208 | 0         | 2.5         | spermatogonia  | RDX      |
| ADH52     | 3.36E-12    | 0.576272955 | 0.316 | 0.298 | 2.06E-07  | 1.06E+00    | Sertoli_cells  | ADH5     |
| CRNDE     | 0           | 0.576199935 | 0.963 | 0.554 | 0         | 1.738267148 | spermatocyte   | CRNDE    |
| SPATA9    | 0           | 0.576037842 | 0.586 | 0.272 | 0         | 2.154411765 | spermatid      | SPATA9   |
| MYL12A2   | 5.59E-58    | 0.575963003 | 0.615 | 0.324 | 3.43E-53  | 1.90E+00    | VSM_cells      | MYL12A   |
| PGM51     | 1.69E-241   | 0.575818211 | 0.313 | 0.031 | 1.04E-236 | 1.01E+01    | VSM_cells      | PGM5     |
| ITIH4     | 0           | 0.575630622 | 0.411 | 0.066 | 0         | 6.227272727 | spermatid      | ITIH4    |
| AHRR      | 0           | 0.57558876  | 0.822 | 0.225 | 0         | 3.653333333 | spermatocyte   | AHRR     |
| CCL22     | 1.12E-149   | 0.575490579 | 0.206 | 0.039 | 6.86E-145 | 5.28E+00    | Leydig_cells   | CCL2     |
| RPL15     | 1.24E-59    | 0.57528831  | 0.973 | 0.902 | 7.59E-55  | 1.08E+00    | endotheliocyte | RPL15    |
| CPTP      | 0           | 0.575281114 | 0.836 | 0.255 | 0         | 3.278431373 | spermatocyte   | CPTP     |
| SMARCB1   | 0           | 0.57527723  | 0.508 | 0.273 | 0         | 1.860805861 | spermatogonia  | SMARCB1  |
| ELN       | 3.14E-87    | 0.575276721 | 0.261 | 0.047 | 1.93E-82  | 5.55E+00    | endotheliocyte | ELN      |
| PRDX2     | 6.64E-164   | 0.575237496 | 0.543 | 0.104 | 4.07E-159 | 5.22E+00    | endotheliocyte | PRDX2    |
| EGR4      | 7.95E-232   | 0.57521508  | 0.185 | 0.029 | 4.88E-227 | 6.38E+00    | Sertoli_cells  | EGR4     |
| DAD1      | 0           | 0.575128882 | 0.915 | 0.5   | 0         | 1.83        | spermatocyte   | DAD1     |
| 11-Sep    | 2.30E-260   | 0.575119721 | 0.326 | 0.061 | 1.41E-255 | 5.34E+00    | Leydig_cells   | 11-Sep   |
| NUTF2     | 0           | 0.575094831 | 0.507 | 0.179 | 0         | 2.832402235 | spermatogonia  | NUTF2    |
| SGF29     | 0           | 0.575018651 | 0.529 | 0.269 | 0         | 1.966542751 | spermatid      | SGF29    |
| ATP6V1G11 | 2.13E-24    | 0.574930206 | 0.513 | 0.515 | 1.31E-19  | 9.96E-01    | Sertoli_cells  | ATP6V1G1 |
| RPS27L1   | 2.10E-36    | 0.574818807 | 0.537 | 0.347 | 1.29E-31  | 1.55E+00    | VSM_cells      | RPS27L   |
| ARF4      | 7.85E-12    | 0.574663424 | 0.431 | 0.482 | 4.82E-07  | 8.94E-01    | Sertoli_cells  | ARF4     |
| PPP1R32   | 0           | 0.574421724 | 0.563 | 0.261 | 0         | 2.157088123 | spermatid      | PPP1R32  |
| UCHL3     | 0           | 0.574253481 | 0.823 | 0.313 | 0         | 2.629392971 | spermatocyte   | UCHL3    |
| LOXHD1    | 0           | 0.573854771 | 0.486 | 0.151 | 0         | 3.218543046 | spermatid      | LOXHD1   |
| RPS218    | 2.17E-65    | 0.573675664 | 0.795 | 0.521 | 1.33E-60  | 1.53E+00    | VSM_cells      | RPS21    |
| WNK1      | 0           | 0.573664499 | 0.598 | 0.373 | 0         | 1.603217158 | spermatogonia  | WNK1     |
| EGLN2     | 0           | 0.573600786 | 0.941 | 0.467 | 0         | 2.014989293 | spermatocyte   | EGLN2    |
| SERPING12 | 0           | 0.573599236 | 0.488 | 0.098 | 0         | 4.979591837 | PTM_cells      | SERPING1 |
| FBL1      | 1.45E-38    | 0.573587899 | 0.515 | 0.476 | 8.91E-34  | 1.08E+00    | Sertoli_cells  | FBL      |
| RPL26P37  | 3.00E-14    | 0.573587455 | 0.175 | 0.071 | 1.84E-09  | 2.46E+00    | macrophages    | RPL26P37 |
| FAM216A   | 0           | 0.573355601 | 0.763 | 0.249 | 0         | 3.064257028 | spermatocyte   | FAM216A  |
| VKORC11   | 0           | 0.573349828 | 0.451 | 0.101 | 0         | 4.465346535 | PTM_cells      | VKORC1   |
| ATP5A11   | 1.19E-27    | 0.573101571 | 0.502 | 0.518 | 7.28E-23  | 9.69E-01    | Sertoli_cells  | ATP5A1   |
| UBE2D2    | 0           | 0.573088533 | 0.974 | 0.613 | 0         | 1.588907015 | spermatocyte   | UBE2D2   |
| MYL12A1   | 3.05E-154   | 0.573000532 | 0.609 | 0.314 | 1.87E-149 | 1.94E+00    | PTM_cells      | MYL12A   |
| TACC12    | 4.03E-99    | 0.572927685 | 0.439 | 0.201 | 2.47E-94  | 2.18E+00    | Leydig_cells   | TACC1    |
| SLC25A33  | 1.73E-126   | 0.572912991 | 0.66  | 0.428 | 1.06E-121 | 1.54E+00    | PTM_cells      | SLC25A3  |
| PARP14    | 0           | 0.572813983 | 0.342 | 0.023 | 0         | 14.86956522 | endotheliocyte | PARP14   |
| TRPV2     | 1.38E-13    | 0.572806119 | 0.132 | 0.01  | 8.45E-09  | 1.32E+01    | T_cells        | TRPV2    |
| CBLN4     | 0           | 0.572765198 | 0.316 | 0.003 | 0         | 105.3333333 | PTM_cells      | CBLN4    |
| DNAI2     | 0           | 0.572708468 | 0.693 | 0.131 | 0         | 5.290076336 | spermatocyte   | DNAI2    |
| ANKRD13A  | 0           | 0.572534833 | 0.914 | 0.381 | 0         | 2.398950131 | spermatocyte   | ANKRD13A |
| KLK5      | 0           | 0.572409566 | 0.416 | 0.062 | 0         | 6.709677419 | spermatid      | KLK5     |
| LDB3      | 1.25E-86    | 0.572281774 | 0.304 | 0.074 | 7.66E-82  | 4.11E+00    | VSM_cells      | LDB3     |
| PPP1R2    | 0           | 0.572194802 | 0.909 | 0.463 | 0         | 1.963282937 | spermatocyte   | PPP1R2   |
| ROCK2     | 3.85E-79    | 0.572188696 | 0.452 | 0.156 | 2.36E-74  | 2.90E+00    | VSM_cells      | ROCK2    |

|               |             |             |       |       |             |             |                |               |
|---------------|-------------|-------------|-------|-------|-------------|-------------|----------------|---------------|
| C11orf42      | 0           | 0.572164501 | 0.419 | 0.065 | 0           | 6.446153846 | spermatid      | C11orf42      |
| LPCAT2        | 4.56E-43    | 0.572031452 | 0.242 | 0.058 | 2.80E-38    | 4.17E+00    | macrophages    | LPCAT2        |
| BACH1         | 0           | 0.571756741 | 0.492 | 0.199 | 0           | 2.472361809 | spermatid      | BACH1         |
| MGST1         | 3.66E-258   | 0.571699248 | 0.313 | 0.065 | 2.25E-253   | 4.82E+00    | PTM_cells      | MGST1         |
| HEXIM13       | 5.76E-132   | 0.571682634 | 0.271 | 0.094 | 3.53E-127   | 2.88E+00    | Sertoli_cells  | HEXIM1        |
| MACF1         | 8.74E-41    | 0.571590726 | 0.499 | 0.25  | 5.36E-36    | 2.00E+00    | endotheliocyte | MACF1         |
| ATP5F1        | 0           | 0.571524909 | 0.94  | 0.515 | 0           | 1.825242718 | spermatocyte   | ATP5F1        |
| RCAN3         | 3.30E-14    | 0.571239435 | 0.211 | 0.024 | 2.02E-09    | 8.79E+00    | T_cells        | RCAN3         |
| CPVL          | 0           | 0.57086748  | 0.359 | 0.15  | 0           | 2.393333333 | spermatogonia  | CPVL          |
| MOV10         | 6.65E-254   | 0.570843664 | 0.227 | 0.041 | 4.08E-249   | 5.54E+00    | Sertoli_cells  | MOV10         |
| ALDH1A31      | 0           | 0.570841598 | 0.343 | 0.039 | 0           | 8.794871795 | PTM_cells      | ALDH1A3       |
| GNPNAT1       | 0           | 0.570756224 | 0.707 | 0.142 | 0           | 4.978873239 | spermatocyte   | GNPNAT1       |
| FRY           | 7.98E-113   | 0.570628491 | 0.298 | 0.057 | 4.90E-108   | 5.23E+00    | VSM_cells      | FRY           |
| GUCY1A2       | 1.01E-189   | 0.570239901 | 0.241 | 0.045 | 6.21E-185   | 5.36E+00    | Leydig_cells   | GUCY1A2       |
| TMEM98        | 1.18E-141   | 0.570147175 | 0.355 | 0.115 | 7.23E-137   | 3.09E+00    | Leydig_cells   | TMEM98        |
| FZD1          | 6.18E-81    | 0.5700498   | 0.202 | 0.025 | 3.79E-76    | 8.08E+00    | macrophages    | FZD1          |
| MPHOSPH8      | 0           | 0.570010756 | 0.651 | 0.429 | 0           | 1.517482517 | spermatogonia  | MPHOSPH8      |
| ST6GALNAC1    | 0           | 0.570001826 | 0.323 | 0.003 | 0           | 107.6666667 | endotheliocyte | ST6GALNAC1    |
| PTPRM         | 3.84E-59    | 0.569999891 | 0.407 | 0.144 | 2.36E-54    | 2.83E+00    | endotheliocyte | PTPRM         |
| SNED11        | 0           | 0.569924942 | 0.343 | 0.046 | 0           | 7.456521739 | PTM_cells      | SNED1         |
| HSP90B11      | 4.22E-119   | 0.569916313 | 0.811 | 0.598 | 2.59E-114   | 1.36E+00    | Leydig_cells   | HSP90B1       |
| RAC13         | 9.06E-91    | 0.569854123 | 0.59  | 0.371 | 5.56E-86    | 1.59E+00    | Leydig_cells   | RAC1          |
| DDX6          | 0           | 0.569839743 | 0.506 | 0.148 | 0           | 3.418918919 | spermatogonia  | DDX6          |
| MED28         | 0           | 0.569795556 | 0.497 | 0.148 | 0           | 3.358108108 | spermatogonia  | MED28         |
| TUBB2         | 2.46E-231   | 0.569684738 | 0.622 | 0.232 | 1.51E-226   | 2.68E+00    | PTM_cells      | TUBB          |
| ATN1          | 7.21E-58    | 0.569417599 | 0.4   | 0.136 | 4.42E-53    | 2.94E+00    | endotheliocyte | ATN1          |
| RPL181        | 1.87E-24    | 0.569136153 | 0.737 | 0.572 | 1.15E-19    | 1.29E+00    | macrophages    | RPL18         |
| TTLL10        | 0           | 0.569109626 | 0.476 | 0.186 | 0           | 2.559139785 | spermatid      | TTLL10        |
| CSTF1         | 0           | 0.569083448 | 0.65  | 0.138 | 0           | 4.710144928 | spermatocyte   | CSTF1         |
| CCDC59        | 0           | 0.569080489 | 0.878 | 0.342 | 0           | 2.567251462 | spermatocyte   | CCDC59        |
| DNAJB11       | 0           | 0.569009699 | 0.457 | 0.213 | 0           | 2.145539906 | spermatogonia  | DNAJB11       |
| CEP68         | 5.59E-78    | 0.568982575 | 0.362 | 0.095 | 3.43E-73    | 3.81E+00    | endotheliocyte | CEP68         |
| RPL311        | 1.73E-67    | 0.568911457 | 0.907 | 0.836 | 1.06E-62    | 1.08E+00    | Leydig_cells   | RPL31         |
| IGFN1         | 1.69E-266   | 0.568848206 | 0.189 | 0.019 | 1.03E-261   | 9.95E+00    | Leydig_cells   | IGFN1         |
| Sep-91        | 0.008370263 | 0.568803473 | 0.263 | 0.139 | 1           | 1.892086331 | T_cells        | 09-Sep        |
| TSC22D4       | 2.58E-283   | 0.568486878 | 0.21  | 0.031 | 1.58E-278   | 6.77E+00    | Sertoli_cells  | TSC22D4       |
| PLXDC21       | 0           | 0.568462985 | 0.372 | 0.056 | 0           | 6.642857143 | PTM_cells      | PLXDC2        |
| IFI61         | 6.96E-25    | 0.56842984  | 0.266 | 0.096 | 4.27E-20    | 2.77E+00    | macrophages    | IFI6          |
| WIPF11        | 0.003985304 | 0.568413278 | 0.237 | 0.111 | 1           | 2.135135135 | T_cells        | WIPF1         |
| BHLHE402      | 1.38E-187   | 0.568383862 | 0.349 | 0.047 | 8.45E-183   | 7.43E+00    | VSM_cells      | BHLHE40       |
| LRPAP1        | 2.78E-305   | 0.568333376 | 0.614 | 0.408 | 1.71E-300   | 1.50E+00    | spermatogonia  | LRPAP1        |
| FAM229B       | 0           | 0.56832628  | 0.943 | 0.805 | 0           | 1.171428571 | spermatid      | FAM229B       |
| NME3          | 6.47E-297   | 0.568255584 | 0.459 | 0.115 | 3.97E-292   | 3.99E+00    | PTM_cells      | NME3          |
| NROB1         | 0           | 0.568226451 | 0.18  | 0.007 | 0           | 25.71428571 | Sertoli_cells  | NROB1         |
| CBR1          | 5.99E-158   | 0.568069927 | 0.346 | 0.104 | 3.68E-153   | 3.33E+00    | Leydig_cells   | CBR1          |
| CCT7          | 0           | 0.567996693 | 0.955 | 0.537 | 0           | 1.77839851  | spermatocyte   | CCT7          |
| DSC2          | 3.45E-217   | 0.567985889 | 0.162 | 0.006 | 2.12E-212   | 2.70E+01    | macrophages    | DSC2          |
| RP11-147C23.1 | 0           | 0.567980937 | 0.33  | 0.108 | 0           | 3.055555556 | spermatid      | RP11-147C23.1 |
| PRKCZ         | 0           | 0.567697281 | 0.535 | 0.267 | 0           | 2.003745318 | spermatid      | PRKCZ         |
| PICALM        | 8.98E-07    | 0.567398095 | 0.397 | 0.345 | 0.055112992 | 1.150724638 | macrophages    | PICALM        |
| TMED10        | 0           | 0.567306906 | 0.613 | 0.337 | 0           | 1.818991098 | spermatogonia  | TMED10        |
| FOXC11        | 3.80E-171   | 0.567071249 | 0.281 | 0.064 | 2.33E-166   | 4.39E+00    | Leydig_cells   | FOXC1         |
| RPL13AP51     | 7.63E-10    | 0.567053907 | 0.199 | 0.102 | 4.68E-05    | 1.95E+00    | macrophages    | RPL13AP5      |
| RPS71         | 2.98E-140   | 0.566952465 | 0.888 | 0.797 | 1.83E-135   | 1.11E+00    | PTM_cells      | RPS7          |
| GOSR2         | 0           | 0.566817167 | 0.54  | 0.346 | 0           | 1.560693642 | spermatid      | GOSR2         |
| NFIX1         | 2.07E-157   | 0.566801899 | 0.456 | 0.178 | 1.27E-152   | 2.56E+00    | PTM_cells      | NFIX          |
| RPS52         | 7.95E-176   | 0.566800293 | 0.877 | 0.815 | 4.88E-171   | 1.08E+00    | PTM_cells      | RPS5          |
| CNIH4         | 0           | 0.566661217 | 0.479 | 0.16  | 0           | 2.99375     | spermatogonia  | CNIH4         |
| LINC00662     | 0           | 0.56657479  | 0.819 | 0.312 | 0           | 2.625       | spermatocyte   | LINC00662     |
| COPB1         | 0           | 0.566536855 | 0.523 | 0.222 | 0           | 2.355855856 | spermatogonia  | COPB1         |
| HOXD8         | 0           | 0.566345104 | 0.754 | 0.235 | 0           | 3.208510638 | spermatocyte   | HOXD8         |
| AK31          | 0           | 0.566291803 | 0.4   | 0.058 | 0           | 6.896551724 | PTM_cells      | AK3           |
| LEPROT3       | 1.91E-80    | 0.56626068  | 0.476 | 0.168 | 1.17E-75    | 2.83E+00    | VSM_cells      | LEPROT        |
| FGF7          | 0           | 0.566237132 | 0.238 | 0.005 | 0           | 47.6        | Leydig_cells   | FGF7          |
| ODF3L2        | 0           | 0.566213656 | 0.38  | 0.095 | 0           | 4           | spermatid      | ODF3L2        |
| IDS2          | 0           | 0.566087563 | 0.384 | 0.055 | 0           | 6.981818182 | PTM_cells      | IDS           |
| PHF14         | 0           | 0.56601753  | 0.491 | 0.186 | 0           | 2.639784946 | spermatogonia  | PHF14         |
| DEF6          | 0           | 0.5659294   | 0.735 | 0.163 | 0           | 4.509202454 | spermatocyte   | DEF6          |
| TERF1         | 0           | 0.565895345 | 0.477 | 0.194 | 0           | 2.458762887 | spermatogonia  | TERF1         |
| TMF1          | 0           | 0.565841896 | 0.725 | 0.577 | 0           | 1.256499133 | spermatid      | TMF1          |
| CA9           | 0           | 0.565759088 | 0.398 | 0.123 | 0           | 3.235772358 | spermatid      | CA9           |
| ATP2A3        | 7.79E-29    | 0.565691117 | 0.158 | 0.007 | 4.78E-24    | 2.26E+01    | T_cells        | ATP2A3        |
| HEXIM11       | 1.65E-138   | 0.565578222 | 0.322 | 0.096 | 1.01E-133   | 3.35E+00    | Leydig_cells   | HEXIM1        |
| LDLR2         | 9.92E-110   | 0.565553555 | 0.33  | 0.068 | 6.08E-105   | 4.85E+00    | VSM_cells      | LDLR          |
| CRIP11        | 2.01E-08    | 0.565552392 | 0.158 | 0.023 | 0.0012347   | 6.869565217 | T_cells        | CRIP1         |



|             |            |             |       |       |             |              |                |             |
|-------------|------------|-------------|-------|-------|-------------|--------------|----------------|-------------|
| TOPAZ1      | 0          | 0.565551737 | 0.374 | 0.052 | 0           | 7.192307692  | spermatogonia  | TOPAZ1      |
| EMC2        | 0          | 0.565433931 | 0.811 | 0.286 | 0           | 2.835664336  | spermatocyte   | EMC2        |
| SNHG71      | 1.62E-254  | 0.565348072 | 0.535 | 0.169 | 9.93E-250   | 3.17E+00     | PTM_cells      | SNHG7       |
| HCAR3       | 1.96E-290  | 0.565325794 | 0.152 | 0.003 | 1.20E-285   | 5.07E+01     | macrophages    | HCAR3       |
| SLC8A1      | 0          | 0.565056324 | 0.277 | 0.012 | 0           | 23.083333333 | VSM_cells      | SLC8A1      |
| NISCH       | 9.20E-119  | 0.564975126 | 0.523 | 0.271 | 5.65E-114   | 1.93E+00     | PTM_cells      | NISCH       |
| SNX3        | 0          | 0.564953201 | 0.949 | 0.575 | 0           | 1.650434783  | spermatocyte   | SNX3        |
| UGCG        | 2.00E-106  | 0.564868746 | 0.32  | 0.119 | 1.23E-101   | 2.69E+00     | Leydig_cells   | UGCG        |
| SNX14       | 0          | 0.56484892  | 0.821 | 0.266 | 0           | 3.086466165  | spermatocyte   | SNX14       |
| CAMK2G      | 1.25E-218  | 0.56479621  | 0.334 | 0.039 | 7.64E-214   | 8.56E+00     | VSM_cells      | CAMK2G      |
| SLC25A65    | 6.08E-73   | 0.564741791 | 0.346 | 0.187 | 3.73E-68    | 1.85E+00     | Sertoli_cells  | SLC25A6     |
| UNG         | 0          | 0.564713657 | 0.353 | 0.039 | 0           | 9.051282051  | spermatogonia  | UNG         |
| RPL323      | 2.63E-71   | 0.56462568  | 0.918 | 0.888 | 1.61E-66    | 1.03E+00     | VSM_cells      | RPL32       |
| MAPK3       | 0          | 0.564609105 | 0.456 | 0.203 | 0           | 2.246305419  | spermatid      | MAPK3       |
| ZNF703      | 2.94E-275  | 0.564582193 | 0.298 | 0.024 | 1.80E-270   | 1.24E+01     | VSM_cells      | ZNF703      |
| RHOC1       | 6.85E-245  | 0.564576369 | 0.473 | 0.139 | 4.20E-240   | 3.40E+00     | PTM_cells      | RHOC        |
| RPS212      | 2.67E-25   | 0.56446642  | 0.71  | 0.524 | 1.64E-20    | 1.35E+00     | macrophages    | RPS21       |
| MBNL13      | 2.84E-99   | 0.564448054 | 0.391 | 0.1   | 1.74E-94    | 3.91E+00     | VSM_cells      | MBNL1       |
| PPP1R10     | 5.71E-07   | 0.564382707 | 0.357 | 0.296 | 0.035001498 | 1.206081081  | macrophages    | PPP1R10     |
| CCL3L31     | 3.26E-13   | 0.564301531 | 0.237 | 0.032 | 2.00E-08    | 7.41E+00     | T_cells        | CCL3L3      |
| DDAH21      | 4.90E-204  | 0.564244397 | 0.468 | 0.161 | 3.01E-199   | 2.91E+00     | PTM_cells      | DDAH2       |
| TAF9        | 0          | 0.564096908 | 0.956 | 0.54  | 0           | 1.77037037   | spermatocyte   | TAF9        |
| RHOQ        | 1.61E-08   | 0.564072134 | 0.215 | 0.125 | 0.000987527 | 1.72         | macrophages    | RHOQ        |
| EIF4B       | 5.74E-41   | 0.564009158 | 0.715 | 0.562 | 3.52E-36    | 1.27E+00     | endotheliocyte | EIF4B       |
| CCDC172     | 0          | 0.56381136  | 0.391 | 0.168 | 0           | 2.327380952  | spermatogonia  | CCDC172     |
| POLE3       | 0          | 0.563792967 | 0.494 | 0.133 | 0           | 3.714285714  | spermatogonia  | POLE3       |
| TMOD3       | 9.87E-57   | 0.563712792 | 0.429 | 0.166 | 6.05E-52    | 2.58E+00     | endotheliocyte | TMOD3       |
| MT-CO24     | 6.31E-24   | 0.563711046 | 0.495 | 0.433 | 3.87E-19    | 1.14E+00     | Sertoli_cells  | MT-CO2      |
| RPS91       | 3.50E-41   | 0.563647079 | 0.912 | 0.837 | 2.15E-36    | 1.09E+00     | macrophages    | RPS9        |
| ARRB21      | 1.35E-07   | 0.563632463 | 0.158 | 0.025 | 0.008273142 | 6.32         | T_cells        | ARRB2       |
| TUBA1B2     | 1.29E-70   | 0.563632369 | 0.673 | 0.73  | 7.90E-66    | 9.22E-01     | Sertoli_cells  | TUBA1B      |
| ARMC3       | 0          | 0.563507302 | 0.933 | 0.337 | 0           | 2.768545994  | spermatocyte   | ARMC3       |
| RSPH6A      | 0          | 0.563432501 | 0.706 | 0.115 | 0           | 6.139130435  | spermatocyte   | RSPH6A      |
| SMIM19      | 0          | 0.563395562 | 0.848 | 0.363 | 0           | 2.336088154  | spermatocyte   | SMIM19      |
| AFF4        | 0          | 0.563373943 | 0.556 | 0.31  | 0           | 1.793548387  | spermatid      | AFF4        |
| C10orf102   | 0          | 0.563312104 | 0.228 | 0.032 | 0           | 7.125        | Sertoli_cells  | C10orf10    |
| WBP11       | 0          | 0.563298217 | 0.866 | 0.378 | 0           | 2.291005291  | spermatocyte   | WBP11       |
| SNHG52      | 2.36E-44   | 0.563188194 | 0.187 | 0.078 | 1.45E-39    | 2.40E+00     | Leydig_cells   | SNHG5       |
| FAM228A     | 0          | 0.563119687 | 0.754 | 0.179 | 0           | 4.212290503  | spermatocyte   | FAM228A     |
| ILKAP       | 0          | 0.563063153 | 0.457 | 0.111 | 0           | 4.117117117  | spermatogonia  | ILKAP       |
| SMARCA4     | 0          | 0.562898083 | 0.612 | 0.374 | 0           | 1.636363636  | spermatogonia  | SMARCA4     |
| SLK         | 0          | 0.562880903 | 0.425 | 0.114 | 0           | 3.728070175  | spermatogonia  | SLK         |
| TLE1        | 0          | 0.562876281 | 0.256 | 0.043 | 0           | 5.953488372  | spermatogonia  | TLE1        |
| CLIC13      | 2.31E-145  | 0.562835616 | 0.518 | 0.252 | 1.42E-140   | 2.06E+00     | PTM_cells      | CLIC1       |
| CMBL        | 0          | 0.56275881  | 0.268 | 0.031 | 0           | 8.64516129   | Leydig_cells   | CMBL        |
| TEX36.AS1   | 0          | 0.562683978 | 0.219 | 0.017 | 0           | 12.88235294  | spermatid      | TEX36.AS1   |
| WIPF1       | 8.09E-20   | 0.56253461  | 0.259 | 0.11  | 4.96E-15    | 2.35E+00     | macrophages    | WIPF1       |
| MAP3K82     | 1.28E-304  | 0.562503631 | 0.326 | 0.026 | 7.83E-300   | 1.25E+01     | VSM_cells      | MAP3K8      |
| MYO6        | 5.29E-63   | 0.562443495 | 0.275 | 0.148 | 3.24E-58    | 1.86E+00     | Sertoli_cells  | MYO6        |
| PKDCC1      | 0          | 0.562342798 | 0.373 | 0.044 | 0           | 8.477272727  | PTM_cells      | PKDCC       |
| NOSIP       | 0          | 0.562331134 | 0.903 | 0.44  | 0           | 2.052272727  | spermatocyte   | NOSIP       |
| CXCL3       | 2.65E-214  | 0.562142391 | 0.303 | 0.028 | 1.63E-209   | 1.08E+01     | endotheliocyte | CXCL3       |
| ID11        | 4.18E-96   | 0.562132158 | 0.319 | 0.07  | 2.56E-91    | 4.56E+00     | VSM_cells      | ID1         |
| NUCB11      | 8.36E-121  | 0.562087682 | 0.36  | 0.13  | 5.13E-116   | 2.77E+00     | Leydig_cells   | NUCB1       |
| COL9A3      | 0          | 0.56207683  | 0.348 | 0.057 | 0           | 6.105263158  | spermatid      | COL9A3      |
| RGS19       | 5.49E-153  | 0.561991332 | 0.182 | 0.011 | 3.37E-148   | 1.65E+01     | macrophages    | RGS19       |
| ATL3        | 0          | 0.561939333 | 0.57  | 0.387 | 0           | 1.472868217  | spermatid      | ATL3        |
| CAMK2N11    | 9.80E-100  | 0.561836462 | 0.268 | 0.05  | 6.01E-95    | 5.36E+00     | VSM_cells      | CAMK2N1     |
| RP1-20208.3 | 0          | 0.561788797 | 0.56  | 0.245 | 0           | 2.285714286  | spermatocyte   | RP1-20208.3 |
| PTPN1       | 0.00099087 | 0.561638039 | 0.286 | 0.254 | 1           | 1.125984252  | macrophages    | PTPN1       |
| MT.ND53     | 8.80E-11   | 0.561536441 | 0.34  | 0.316 | 5.40E-06    | 1.08E+00     | Sertoli_cells  | MT.ND5      |
| DUSP15      | 0          | 0.561532858 | 0.934 | 0.443 | 0           | 2.108352144  | spermatocyte   | DUSP15      |
| INPP5D      | 2.05E-39   | 0.561522942 | 0.242 | 0.062 | 1.25E-34    | 3.90E+00     | macrophages    | INPP5D      |
| TMSB103     | 0          | 0.561473037 | 0.835 | 0.376 | 0           | 2.220744681  | PTM_cells      | TMSB10      |
| ADCY5       | 0          | 0.561369734 | 0.343 | 0.05  | 0           | 6.86         | PTM_cells      | ADCY5       |
| DPYSL21     | 3.65E-30   | 0.561207951 | 0.273 | 0.09  | 2.24E-25    | 3.03E+00     | macrophages    | DPYSL2      |
| C14orf39    | 0          | 0.561126834 | 0.369 | 0.077 | 0           | 4.792207792  | spermatogonia  | C14orf39    |
| PSMB7       | 0          | 0.561014925 | 0.952 | 0.551 | 0           | 1.727767695  | spermatocyte   | PSMB7       |
| POLR2L      | 0          | 0.560950157 | 0.574 | 0.373 | 0           | 1.538873995  | spermatogonia  | POLR2L      |
| ARPC51      | 2.37E-17   | 0.560699727 | 0.376 | 0.35  | 1.45E-12    | 1.07E+00     | Sertoli_cells  | ARPC5       |
| IFI27L2     | 3.86E-249  | 0.560660804 | 0.368 | 0.079 | 2.37E-244   | 4.66E+00     | Leydig_cells   | IFI27L2     |
| CAND1       | 0          | 0.56065395  | 0.503 | 0.148 | 0           | 3.398648649  | spermatogonia  | CAND1       |
| SQSTM11     | 3.24E-143  | 0.560608923 | 0.602 | 0.33  | 1.99E-138   | 1.82E+00     | PTM_cells      | SQSTM1      |
| SNUPN       | 0          | 0.560526398 | 0.797 | 0.243 | 0           | 3.279835391  | spermatocyte   | SNUPN       |
| BOD1L1      | 4.81E-29   | 0.560472166 | 0.329 | 0.255 | 2.95E-24    | 1.29E+00     | Sertoli_cells  | BOD1L1      |

|              |             |             |       |       |             |             |                |              |
|--------------|-------------|-------------|-------|-------|-------------|-------------|----------------|--------------|
| RPL322       | 1.02E-180   | 0.560408056 | 0.945 | 0.886 | 6.26E-176   | 1.07E+00    | PTM_cells      | RPL32        |
| SMTN         | 1.95E-199   | 0.5603694   | 0.347 | 0.045 | 1.19E-194   | 7.71E+00    | VSM_cells      | SMTN         |
| MECP2        | 0.003910827 | 0.560233652 | 0.184 | 0.073 | 1           | 2.520547945 | T_cells        | MECP2        |
| ITM2C        | 0           | 0.560179602 | 0.386 | 0.047 | 0           | 8.212765957 | PTM_cells      | ITM2C        |
| LVCAT1       | 0           | 0.560141136 | 0.663 | 0.138 | 0           | 4.804347826 | spermatocyte   | LVCAT1       |
| PML          | 5.28E-220   | 0.560106388 | 0.347 | 0.036 | 3.24E-215   | 9.64E+00    | endotheliocyte | PML          |
| CTB.50L17.10 | 0           | 0.560028077 | 0.346 | 0.099 | 0           | 3.494949495 | spermatocyte   | CTB.50L17.10 |
| RPS192       | 6.59E-34    | 0.559998699 | 0.862 | 0.758 | 4.04E-29    | 1.14E+00    | macrophages    | RPS19        |
| CEP19        | 0           | 0.559963434 | 0.744 | 0.168 | 0           | 4.428571429 | spermatocyte   | CEP19        |
| MIF          | 2.43E-182   | 0.559920391 | 0.448 | 0.162 | 1.49E-177   | 2.77E+00    | PTM_cells      | MIF          |
| NDUFB7       | 1.75E-274   | 0.55990508  | 0.575 | 0.413 | 1.07E-269   | 1.39E+00    | spermatogonia  | NDUFB7       |
| RFWD3        | 0           | 0.559890871 | 0.429 | 0.098 | 0           | 4.37755102  | spermatogonia  | RFWD3        |
| RHOA         | 0           | 0.559880366 | 0.767 | 0.485 | 0           | 1.581443299 | spermatogonia  | RHOA         |
| AGPAT3       | 0           | 0.559667624 | 0.514 | 0.244 | 0           | 2.106557377 | spermatid      | AGPAT3       |
| SRP141       | 2.52E-41    | 0.559514869 | 0.849 | 0.728 | 1.55E-36    | 1.17E+00    | endotheliocyte | SRP14        |
| TAPBP        | 1.88E-202   | 0.559455304 | 0.34  | 0.037 | 1.15E-197   | 9.19E+00    | endotheliocyte | TAPBP        |
| KLF5         | 0           | 0.559243347 | 0.494 | 0.267 | 0           | 1.850187266 | spermatid      | KLF5         |
| MT-ND4L1     | 5.56E-164   | 0.559154783 | 0.473 | 0.171 | 3.41E-159   | 2.77E+00    | PTM_cells      | MT-ND4L      |
| PRMT11       | 1.93E-75    | 0.558708499 | 0.593 | 0.224 | 1.18E-70    | 2.65E+00    | endotheliocyte | PRMT1        |
| AC006942.4   | 0           | 0.558695162 | 0.479 | 0.182 | 0           | 2.631868132 | spermatid      | AC006942.4   |
| PLD31        | 5.05E-216   | 0.558541496 | 0.499 | 0.167 | 3.10E-211   | 2.99E+00    | PTM_cells      | PLD3         |
| NDUFB81      | 1.10E-48    | 0.558440973 | 0.581 | 0.335 | 6.72E-44    | 1.73E+00    | VSM_cells      | NDUFB8       |
| RIBC1        | 0           | 0.558435354 | 0.538 | 0.252 | 0           | 2.134920635 | spermatid      | RIBC1        |
| SERBP1       | 0           | 0.558382541 | 0.981 | 0.649 | 0           | 1.51155624  | spermatocyte   | SERBP1       |
| SP1002       | 1.55E-05    | 0.558377572 | 0.211 | 0.056 | 0.951830493 | 3.767857143 | T_cells        | SP100        |
| DLC11        | 3.80E-78    | 0.558365919 | 0.319 | 0.142 | 2.33E-73    | 2.25E+00    | Leydig_cells   | DLC1         |
| FOXN3        | 4.85E-07    | 0.558178454 | 0.32  | 0.243 | 0.029751212 | 1.316872428 | macrophages    | FOXN3        |
| NPHP1        | 0           | 0.558088726 | 0.862 | 0.295 | 0           | 2.922033898 | spermatocyte   | NPHP1        |
| GSTA4        | 3.98E-179   | 0.557904517 | 0.196 | 0.041 | 2.44E-174   | 4.78E+00    | Sertoli_cells  | GSTA4        |
| ZFP91        | 0           | 0.557877504 | 0.939 | 0.537 | 0           | 1.748603352 | spermatocyte   | ZFP91        |
| FOXO31       | 1.59E-72    | 0.557872582 | 0.272 | 0.135 | 9.75E-68    | 2.01E+00    | Sertoli_cells  | FOXO3        |
| ADI12        | 6.46E-43    | 0.557855671 | 0.232 | 0.132 | 3.96E-38    | 1.76E+00    | Sertoli_cells  | ADI1         |
| HSPB9        | 0           | 0.557743629 | 0.786 | 0.247 | 0           | 3.182186235 | spermatocyte   | HSPB9        |
| COL6A12      | 6.72E-125   | 0.557664651 | 0.476 | 0.116 | 4.12E-120   | 4.10E+00    | VSM_cells      | COL6A1       |
| PKIG         | 0           | 0.557641188 | 0.814 | 0.307 | 0           | 2.651465798 | spermatocyte   | PKIG         |
| MND1         | 0           | 0.557594728 | 0.345 | 0.098 | 0           | 3.520408163 | spermatogonia  | MND1         |
| CLDND2       | 0           | 0.557387595 | 0.597 | 0.21  | 0           | 2.842857143 | spermatocyte   | CLDND2       |
| NBR1         | 0           | 0.557326558 | 0.644 | 0.48  | 0           | 1.341666667 | spermatid      | NBR1         |
| C8orf4       | 1.11E-199   | 0.557288584 | 0.288 | 0.027 | 6.83E-195   | 1.07E+01    | endotheliocyte | C8orf4       |
| EIF4A3       | 0           | 0.557210324 | 0.581 | 0.321 | 0           | 1.809968847 | spermatogonia  | EIF4A3       |
| CFL12        | 1.06E-45    | 0.557183583 | 0.633 | 0.744 | 6.52E-41    | 8.51E-01    | Sertoli_cells  | CFL1         |
| APOA1BP      | 1.34E-28    | 0.557062911 | 0.155 | 0.084 | 8.22E-24    | 1.85E+00    | Sertoli_cells  | APOA1BP      |
| SNHG19       | 1.76E-301   | 0.557051282 | 0.203 | 0.027 | 1.08E-296   | 7.52E+00    | Sertoli_cells  | SNHG19       |
| ENSA         | 4.54E-40    | 0.55704594  | 0.504 | 0.265 | 2.78E-35    | 1.90E+00    | endotheliocyte | ENSA         |
| KLHDC3       | 0           | 0.557039105 | 0.97  | 0.529 | 0           | 1.833648393 | spermatocyte   | KLHDC3       |
| ITGA9        | 0           | 0.556853569 | 0.322 | 0.02  | 0           | 16.1        | PTM_cells      | ITGA9        |
| GPR18        | 0           | 0.556792438 | 0.424 | 0.113 | 0           | 3.752212389 | spermatid      | GPR18        |
| NUF2         | 0           | 0.556762357 | 0.531 | 0.309 | 0           | 1.718446602 | spermatogonia  | NUF2         |
| PTGER2       | 1.39E-27    | 0.556723909 | 0.158 | 0.007 | 8.52E-23    | 2.26E+01    | T_cells        | PTGER2       |
| PCBP1        | 4.81E-39    | 0.55662899  | 0.628 | 0.371 | 2.95E-34    | 1.69E+00    | endotheliocyte | PCBP1        |
| NDUFB72      | 8.26E-05    | 0.556607074 | 0.39  | 0.452 | 1           | 0.862831858 | Sertoli_cells  | NDUFB7       |
| SLCO2A1      | 0           | 0.556211303 | 0.273 | 0.006 | 0           | 45.5        | endotheliocyte | SLCO2A1      |
| UPF3A        | 0           | 0.556173938 | 0.93  | 0.472 | 0           | 1.970338983 | spermatocyte   | UPF3A        |
| MPHOSPH10    | 0           | 0.556050244 | 0.448 | 0.087 | 0           | 5.149425287 | spermatogonia  | MPHOSPH10    |
| FAM186B      | 0           | 0.555886275 | 0.831 | 0.24  | 0           | 3.4625      | spermatocyte   | FAM186B      |
| NFIA2        | 2.00E-66    | 0.55577675  | 0.503 | 0.21  | 1.23E-61    | 2.40E+00    | VSM_cells      | NFIA         |
| RHOBTB32     | 5.13E-77    | 0.555707604 | 0.276 | 0.131 | 3.15E-72    | 2.11E+00    | Sertoli_cells  | RHOBTB3      |
| RGS16        | 7.46E-86    | 0.555684931 | 0.283 | 0.055 | 4.58E-81    | 5.15E+00    | endotheliocyte | RGS16        |
| LRP8         | 2.16E-198   | 0.555602637 | 0.23  | 0.053 | 1.33E-193   | 4.34E+00    | Sertoli_cells  | LRP8         |
| TPI1         | 1.26E-34    | 0.555492248 | 0.567 | 0.579 | 7.71E-30    | 9.79E-01    | Sertoli_cells  | TPI1         |
| FAM129B      | 2.05E-187   | 0.555389307 | 0.323 | 0.036 | 1.26E-182   | 8.97E+00    | endotheliocyte | FAM129B      |
| RPS6KA31     | 1.60E-54    | 0.555389077 | 0.209 | 0.037 | 9.84E-50    | 5.65E+00    | macrophages    | RPS6KA3      |
| NSFL1C       | 0           | 0.555363444 | 0.55  | 0.258 | 0           | 2.131782946 | spermatogonia  | NSFL1C       |
| C5orf581     | 0.00110908  | 0.555362744 | 0.32  | 0.159 | 1           | 2.012578616 | mastocyte      | C5orf58      |
| LAMB22       | 7.94E-96    | 0.555241454 | 0.366 | 0.091 | 4.87E-91    | 4.02E+00    | VSM_cells      | LAMB2        |
| GRN          | 0           | 0.555017479 | 0.307 | 0.089 | 0           | 3.449438202 | spermatogonia  | GRN          |
| MSMO1        | 4.42E-62    | 0.554967562 | 0.22  | 0.104 | 2.71E-57    | 2.12E+00    | Sertoli_cells  | MSMO1        |
| ASZ1         | 0           | 0.554927407 | 0.416 | 0.06  | 0           | 6.933333333 | spermatogonia  | ASZ1         |
| RAP2A        | 6.09E-26    | 0.55491996  | 0.189 | 0.054 | 3.73E-21    | 3.50E+00    | macrophages    | RAP2A        |
| NEURL1B      | 1.75E-176   | 0.554919371 | 0.24  | 0.048 | 1.08E-171   | 5.00E+00    | Leydig_cells   | NEURL1B      |
| DDX171       | 9.41E-36    | 0.554917462 | 0.707 | 0.499 | 5.77E-31    | 1.42E+00    | endotheliocyte | DDX17        |
| PRKAR2B      | 9.88E-92    | 0.5549171   | 0.225 | 0.086 | 6.06E-87    | 2.62E+00    | Sertoli_cells  | PRKAR2B      |
| NFIC2        | 3.03E-45    | 0.554512476 | 0.349 | 0.241 | 1.86E-40    | 1.45E+00    | Sertoli_cells  | NFIC         |
| RBMS3        | 9.61E-102   | 0.554497056 | 0.336 | 0.134 | 5.89E-97    | 2.51E+00    | Leydig_cells   | RBMS3        |
| 06-Mar       | 0           | 0.554483022 | 0.556 | 0.269 | 0           | 2.066914498 | spermatogonia  | 06-Mar       |

|                |             |             |       |       |             |             |                |               |
|----------------|-------------|-------------|-------|-------|-------------|-------------|----------------|---------------|
| RPS181         | 6.57E-38    | 0.554446629 | 0.939 | 0.852 | 4.03E-33    | 1.10E+00    | macrophages    | RPS18         |
| CECR1          | 7.05E-13    | 0.554392633 | 0.219 | 0.105 | 4.32E-08    | 2.09E+00    | macrophages    | CECR1         |
| ATP5D          | 3.55E-46    | 0.554205384 | 0.592 | 0.38  | 2.18E-41    | 1.56E+00    | VSM_cells      | ATP5D         |
| PTGES          | 0           | 0.554192262 | 0.208 | 0.016 | 0           | 13          | Sertoli_cells  | PTGES         |
| LSM1           | 0           | 0.554188247 | 0.434 | 0.128 | 0           | 3.390625    | spermatogonia  | LSM1          |
| GOT2           | 3.10E-128   | 0.554143427 | 0.232 | 0.074 | 1.90E-123   | 3.14E+00    | Sertoli_cells  | GOT2          |
| RPL21          | 0           | 0.554096903 | 0.766 | 0.398 | 0           | 1.924623116 | spermatogonia  | RPL21         |
| MTFR1          | 0           | 0.554045642 | 0.58  | 0.4   | 0           | 1.45        | spermatid      | MTFR1         |
| SMOC11         | 6.19E-162   | 0.553892845 | 0.249 | 0.07  | 3.80E-157   | 3.56E+00    | Sertoli_cells  | SMOC1         |
| CNN21          | 1.00E-07    | 0.553862376 | 0.211 | 0.042 | 0.006133555 | 5.023809524 | T_cells        | CNN2          |
| JTB            | 8.42E-49    | 0.553837684 | 0.293 | 0.177 | 5.17E-44    | 1.66E+00    | Sertoli_cells  | JTB           |
| C17orf50       | 0           | 0.553651339 | 0.69  | 0.373 | 0           | 1.849865952 | spermatid      | C17orf50      |
| IL13RA2        | 3.30E-244   | 0.553607173 | 0.472 | 0.306 | 2.02E-239   | 1.54E+00    | spermatid      | IL13RA2       |
| CCDC96         | 0           | 0.553446967 | 0.884 | 0.346 | 0           | 2.554913295 | spermatocyte   | CCDC96        |
| PDE1A          | 0           | 0.553398432 | 0.592 | 0.283 | 0           | 2.091872792 | spermatid      | PDE1A         |
| FEZ2           | 5.67E-126   | 0.55325275  | 0.449 | 0.096 | 3.48E-121   | 4.68E+00    | endotheliocyte | FEZ2          |
| RPS214         | 2.05E-132   | 0.553166503 | 0.776 | 0.515 | 1.26E-127   | 1.51E+00    | Leydig_cells   | RPS21         |
| CENPV          | 0           | 0.553125044 | 0.439 | 0.128 | 0           | 3.4296875   | spermatogonia  | CENPV         |
| INO80E         | 0           | 0.553116244 | 0.428 | 0.116 | 0           | 3.689655172 | spermatogonia  | INO80E        |
| KIF1A          | 0           | 0.553006066 | 0.174 | 0.02  | 0           | 8.7         | spermatogonia  | KIF1A         |
| BUB1           | 0           | 0.552978536 | 0.446 | 0.203 | 0           | 2.197044335 | spermatogonia  | BUB1          |
| REL            | 1.81E-74    | 0.552931615 | 0.387 | 0.11  | 1.11E-69    | 3.52E+00    | endotheliocyte | REL           |
| VRK3           | 0           | 0.552898246 | 0.764 | 0.618 | 0           | 1.236245955 | spermatid      | VRK3          |
| HSPA8          | 1.45E-37    | 0.552835656 | 0.555 | 0.568 | 8.92E-33    | 9.77E-01    | Sertoli_cells  | HSPA8         |
| PLSCR12        | 0           | 0.552627391 | 0.291 | 0.039 | 0           | 7.461538462 | Leydig_cells   | PLSCR1        |
| GLTSCR21       | 1.91E-105   | 0.552614979 | 0.679 | 0.514 | 1.17E-100   | 1.32E+00    | PTM_cells      | GLTSCR2       |
| MCL14          | 0.009610309 | 0.552431524 | 0.412 | 0.538 | 1           | 0.765799257 | Sertoli_cells  | MCL1          |
| EDNRA1         | 0           | 0.552408352 | 0.357 | 0.036 | 0           | 9.916666667 | PTM_cells      | EDNRA         |
| ALDOA          | 3.46E-118   | 0.552235023 | 0.761 | 0.608 | 2.12E-113   | 1.25E+00    | PTM_cells      | ALDOA         |
| SCD5           | 6.19E-26    | 0.552194781 | 0.28  | 0.215 | 3.80E-21    | 1.30E+00    | Sertoli_cells  | SCD5          |
| SLC25A5        | 1.88E-86    | 0.552177159 | 0.484 | 0.153 | 1.15E-81    | 3.16E+00    | VSM_cells      | SLC25A5       |
| RNF216         | 9.80E-287   | 0.552107502 | 0.602 | 0.406 | 6.02E-282   | 1.48E+00    | spermatogonia  | RNF216        |
| FHL2           | 2.08E-237   | 0.551952264 | 0.422 | 0.102 | 1.28E-232   | 4.14E+00    | Leydig_cells   | FHL2          |
| RP11.466H18.12 | 5.28E-108   | 0.551932419 | 0.162 | 0.034 | 3.24E-103   | 4.76E+00    | Leydig_cells   | RP11.466H18.1 |
| PIWIL1         | 1.25E-67    | 0.551632315 | 0.355 | 0.29  | 7.67E-63    | 1.22E+00    | spermatogonia  | PIWIL1        |
| NKX3.1         | 0           | 0.551608094 | 0.193 | 0.009 | 0           | 21.44444444 | Sertoli_cells  | NKX3.1        |
| MAN1A2         | 1.08E-187   | 0.551414739 | 0.449 | 0.275 | 6.64E-183   | 1.63E+00    | spermatogonia  | MAN1A2        |
| GADD45A1       | 0           | 0.551175585 | 0.402 | 0.057 | 0           | 7.052631579 | PTM_cells      | GADD45A       |
| B3GALT4        | 0           | 0.551080544 | 0.616 | 0.122 | 0           | 5.049180328 | spermatocyte   | B3GALT4       |
| TP53RK         | 0           | 0.551013482 | 0.772 | 0.254 | 0           | 3.039370079 | spermatocyte   | TP53RK        |
| YY1            | 0           | 0.551010486 | 0.57  | 0.26  | 0           | 2.192307692 | spermatogonia  | YY1           |
| UCP2           | 4.37E-11    | 0.550875588 | 0.249 | 0.141 | 2.68E-06    | 1.77E+00    | macrophages    | UCP2          |
| FCGR2C         | 3.76E-102   | 0.550825417 | 0.118 | 0.007 | 2.31E-97    | 1.69E+01    | macrophages    | FCGR2C        |
| MT1X           | 5.26E-126   | 0.550801059 | 0.355 | 0.06  | 3.23E-121   | 5.92E+00    | endotheliocyte | MT1X          |
| JDP21          | 0           | 0.550741596 | 0.242 | 0.025 | 0           | 9.68        | Leydig_cells   | JDP2          |
| ATP2B4         | 2.94E-47    | 0.550717525 | 0.433 | 0.204 | 1.80E-42    | 2.12E+00    | VSM_cells      | ATP2B4        |
| CEP70          | 0           | 0.550673382 | 0.911 | 0.384 | 0           | 2.372395833 | spermatocyte   | CEP70         |
| PCM1           | 0           | 0.550578395 | 0.981 | 0.653 | 0           | 1.50229709  | spermatocyte   | PCM1          |
| TAP1           | 2.35E-236   | 0.550569281 | 0.303 | 0.025 | 1.44E-231   | 1.21E+01    | endotheliocyte | TAP1          |
| QSOX1          | 2.27E-41    | 0.550435273 | 0.42  | 0.291 | 1.39E-36    | 1.44E+00    | Leydig_cells   | QSOX1         |
| CDC37L1        | 0           | 0.550413854 | 0.448 | 0.105 | 0           | 4.266666667 | spermatogonia  | CDC37L1       |
| RPS241         | 7.98E-27    | 0.550285211 | 0.902 | 0.886 | 4.90E-22    | 1.02E+00    | macrophages    | RPS24         |
| RANGRF         | 0           | 0.550277618 | 0.925 | 0.451 | 0           | 2.050997783 | spermatocyte   | RANGRF        |
| ARPC1A         | 5.82E-30    | 0.550197127 | 0.529 | 0.364 | 3.57E-25    | 1.45E+00    | VSM_cells      | ARPC1A        |
| CCNB1          | 0           | 0.550193719 | 0.741 | 0.224 | 0           | 3.308035714 | spermatocyte   | CCNB1         |
| SP1001         | 9.70E-33    | 0.550094707 | 0.209 | 0.055 | 5.95E-28    | 3.80E+00    | macrophages    | SP100         |
| FBL            | 0           | 0.550085537 | 0.614 | 0.416 | 0           | 1.475961538 | spermatid      | FBL           |
| SHANK3         | 1.71E-227   | 0.549957729 | 0.298 | 0.026 | 1.05E-222   | 1.15E+01    | endotheliocyte | SHANK3        |
| SFR1           | 0           | 0.549925738 | 0.429 | 0.209 | 0           | 2.052631579 | spermatogonia  | SFR1          |
| PSMA2          | 0           | 0.54980586  | 0.512 | 0.257 | 0           | 1.992217899 | spermatogonia  | PSMA2         |
| CAPN11         | 0           | 0.549764536 | 0.591 | 0.13  | 0           | 4.546153846 | spermatocyte   | CAPN11        |
| UBXN8          | 0           | 0.549715832 | 0.489 | 0.257 | 0           | 1.902723735 | spermatid      | UBXN8         |
| LMO4           | 1.01E-263   | 0.549662168 | 0.277 | 0.102 | 6.22E-259   | 2.72E+00    | spermatogonia  | LMO4          |
| TRAPPC2L       | 0           | 0.54963028  | 0.918 | 0.449 | 0           | 2.04454343  | spermatocyte   | TRAPPC2L      |
| MSL1           | 0           | 0.549614065 | 0.525 | 0.25  | 0           | 2.1         | spermatogonia  | MSL1          |
| KCNQ1OT11      | 1.98E-51    | 0.549577812 | 0.322 | 0.167 | 1.21E-46    | 1.93E+00    | Leydig_cells   | KCNQ1OT1      |
| QKI            | 1.35E-11    | 0.549523348 | 0.396 | 0.426 | 8.28E-07    | 9.30E-01    | Sertoli_cells  | QKI           |
| AKR1C2         | 1.24E-168   | 0.549465154 | 0.274 | 0.064 | 7.60E-164   | 4.28E+00    | Leydig_cells   | AKR1C2        |
| CDC42EP4       | 1.94E-177   | 0.54945366  | 0.328 | 0.039 | 1.19E-172   | 8.41E+00    | endotheliocyte | CDC42EP4      |
| EIF4A21        | 5.00E-49    | 0.549387467 | 0.759 | 0.462 | 3.07E-44    | 1.64E+00    | endotheliocyte | EIF4A2        |
| H1FX           | 3.92E-73    | 0.549365591 | 0.437 | 0.135 | 2.40E-68    | 3.24E+00    | endotheliocyte | H1FX          |
| FKBP11         | 0.000539505 | 0.549181472 | 0.211 | 0.075 | 1           | 2.813333333 | T_cells        | FKBP11        |
| HMG2           | 3.19E-257   | 0.54902772  | 0.731 | 0.587 | 1.95E-252   | 1.25E+00    | spermatogonia  | HMG2          |
| MTFR1L         | 0           | 0.549024975 | 0.848 | 0.364 | 0           | 2.32967033  | spermatocyte   | MTFR1L        |
| TMA7           | 2.77E-22    | 0.548858573 | 0.627 | 0.718 | 1.70E-17    | 8.73E-01    | Sertoli_cells  | TMA7          |

|            |             |             |       |       |           |             |                |            |
|------------|-------------|-------------|-------|-------|-----------|-------------|----------------|------------|
| C20orf85   | 0           | 0.548789168 | 0.862 | 0.385 | 0         | 2.238961039 | spermatocyte   | C20orf85   |
| SESN3      | 0           | 0.548540779 | 0.646 | 0.44  | 0         | 1.468181818 | spermatid      | SESN3      |
| NCF2       | 4.30E-200   | 0.548477109 | 0.199 | 0.01  | 2.64E-195 | 1.99E+01    | macrophages    | NCF2       |
| THUMPD3    | 0           | 0.54839789  | 0.953 | 0.479 | 0         | 1.989561587 | spermatocyte   | THUMPD3    |
| EIF3L      | 4.32E-45    | 0.548397429 | 0.564 | 0.343 | 2.65E-40  | 1.64E+00    | VSM_cells      | EIF3L      |
| TMPO-AS1   | 0           | 0.548380847 | 0.519 | 0.145 | 0         | 3.579310345 | spermatocyte   | TMPO-AS1   |
| MT.ATP82   | 3.24E-48    | 0.548348238 | 0.292 | 0.168 | 1.99E-43  | 1.74E+00    | Sertoli_cells  | MT.ATP8    |
| FBXO21     | 3.05E-195   | 0.548290528 | 0.509 | 0.193 | 1.87E-190 | 2.64E+00    | PTM_cells      | FBXO21     |
| MEST       | 1.36E-30    | 0.548238665 | 0.307 | 0.206 | 8.34E-26  | 1.49E+00    | Leydig_cells   | MEST       |
| NFASC      | 1.20E-177   | 0.548234505 | 0.258 | 0.028 | 7.35E-173 | 9.21E+00    | VSM_cells      | NFASC      |
| DDX18      | 0           | 0.548179621 | 0.519 | 0.219 | 0         | 2.369863014 | spermatogonia  | DDX18      |
| ATP6V0D1   | 0           | 0.548097082 | 0.89  | 0.334 | 0         | 2.664670659 | spermatocyte   | ATP6V0D1   |
| SRSF91     | 4.92E-30    | 0.548073385 | 0.469 | 0.422 | 3.02E-25  | 1.11E+00    | Sertoli_cells  | SRSF9      |
| SOX30      | 8.04E-291   | 0.548068951 | 0.601 | 0.461 | 4.93E-286 | 1.30E+00    | spermatid      | SOX30      |
| RPL343     | 3.64E-134   | 0.547762784 | 0.933 | 0.904 | 2.23E-129 | 1.03E+00    | PTM_cells      | RPL34      |
| AURKAIP1   | 0           | 0.547725884 | 0.985 | 0.745 | 0         | 1.322147651 | spermatocyte   | AURKAIP1   |
| CCDC69     | 0           | 0.547702883 | 0.315 | 0.019 | 0         | 16.57894737 | endotheliocyte | CCDC69     |
| AMZ2       | 0           | 0.547639804 | 0.971 | 0.535 | 0         | 1.814953271 | spermatocyte   | AMZ2       |
| SPAG5      | 0           | 0.547620922 | 0.876 | 0.322 | 0         | 2.720496894 | spermatocyte   | SPAG5      |
| UBE2B      | 0           | 0.547464187 | 0.64  | 0.459 | 0         | 1.394335512 | spermatogonia  | UBE2B      |
| PARM1      | 7.67E-120   | 0.547462025 | 0.323 | 0.062 | 4.71E-115 | 5.21E+00    | VSM_cells      | PARM1      |
| SEC62      | 5.71E-43    | 0.547404366 | 0.667 | 0.431 | 3.50E-38  | 1.55E+00    | endotheliocyte | SEC62      |
| TCEAL43    | 8.52E-108   | 0.547338721 | 0.385 | 0.179 | 5.23E-103 | 2.15E+00    | Sertoli_cells  | TCEAL4     |
| TTC23L     | 0           | 0.547177024 | 0.514 | 0.245 | 0         | 2.097959184 | spermatid      | TTC23L     |
| ATP6V1B2   | 0           | 0.547161328 | 0.754 | 0.282 | 0         | 2.673758865 | spermatocyte   | ATP6V1B2   |
| BNIP3L1    | 9.26E-87    | 0.547097451 | 0.655 | 0.533 | 5.68E-82  | 1.23E+00    | PTM_cells      | BNIP3L     |
| MCL12      | 1.61E-34    | 0.547063062 | 0.575 | 0.528 | 9.89E-30  | 1.09E+00    | Leydig_cells   | MCL1       |
| BBS5       | 0           | 0.547056493 | 0.703 | 0.205 | 0         | 3.429268293 | spermatocyte   | BBS5       |
| PRNP1      | 6.06E-168   | 0.546934149 | 0.515 | 0.224 | 3.72E-163 | 2.30E+00    | PTM_cells      | PRNP       |
| TMED9      | 0           | 0.546927971 | 0.484 | 0.144 | 0         | 3.361111111 | spermatogonia  | TMED9      |
| NEFM       | 0           | 0.546741938 | 0.76  | 0.196 | 0         | 3.87755102  | spermatocyte   | NEFM       |
| PPDPF2     | 0.008946809 | 0.546709673 | 0.526 | 0.446 | 1         | 1.179372197 | T_cells        | PPDPF      |
| ELMSAN1    | 2.75E-98    | 0.546654823 | 0.365 | 0.078 | 1.69E-93  | 4.68E+00    | endotheliocyte | ELMSAN1    |
| C19orf45   | 0           | 0.546541474 | 0.459 | 0.147 | 0         | 3.12244898  | spermatid      | C19orf45   |
| LRRIQ1     | 0           | 0.54638344  | 0.929 | 0.443 | 0         | 2.097065463 | spermatocyte   | LRRIQ1     |
| AC008155.1 | 9.41E-20    | 0.546375423 | 0.158 | 0.048 | 5.77E-15  | 3.29E+00    | macrophages    | AC008155.1 |
| SNAI2      | 0           | 0.546368079 | 0.268 | 0.016 | 0         | 16.75       | Leydig_cells   | SNAI2      |
| GAS51      | 7.85E-52    | 0.546360347 | 0.17  | 0.061 | 4.82E-47  | 2.79E+00    | Leydig_cells   | GAS5       |
| CHMP1B1    | 0.00269496  | 0.546330398 | 0.368 | 0.226 | 1         | 1.628318584 | T_cells        | CHMP1B     |
| POU2F2     | 3.24E-14    | 0.546282893 | 0.286 | 0.152 | 1.99E-09  | 1.88E+00    | macrophages    | POU2F2     |
| PIGT       | 0           | 0.546237036 | 0.53  | 0.262 | 0         | 2.022900763 | spermatogonia  | PIGT       |
| PFN12      | 4.42E-131   | 0.546215249 | 0.653 | 0.397 | 2.71E-126 | 1.64E+00    | PTM_cells      | PFN1       |
| ATP6AP21   | 5.93E-255   | 0.54610213  | 0.529 | 0.161 | 3.64E-250 | 3.29E+00    | PTM_cells      | ATP6AP2    |
| MT-CO12    | 1.17E-60    | 0.546049234 | 0.607 | 0.447 | 7.19E-56  | 1.36E+00    | Leydig_cells   | MT-CO1     |
| TERF2IP1   | 1.76E-51    | 0.545927867 | 0.456 | 0.338 | 1.08E-46  | 1.35E+00    | Sertoli_cells  | TERF2IP    |
| LAT2       | 3.09E-205   | 0.545798811 | 0.202 | 0.01  | 1.90E-200 | 2.02E+01    | macrophages    | LAT2       |
| CPEB3      | 0           | 0.545727084 | 0.467 | 0.179 | 0         | 2.608938547 | spermatid      | CPEB3      |
| PHF20L1    | 0           | 0.545681199 | 0.847 | 0.325 | 0         | 2.606153846 | spermatocyte   | PHF20L1    |
| EEA1       | 1.93E-236   | 0.545615161 | 0.397 | 0.212 | 1.18E-231 | 1.87E+00    | spermatogonia  | EEA1       |
| PRCP       | 0           | 0.545578559 | 0.746 | 0.193 | 0         | 3.865284974 | spermatocyte   | PRCP       |
| CCDC74B    | 0           | 0.545444876 | 0.878 | 0.337 | 0         | 2.605341246 | spermatocyte   | CCDC74B    |
| SPCS2      | 0           | 0.545415226 | 0.567 | 0.318 | 0         | 1.783018868 | spermatogonia  | SPCS2      |
| SORL1      | 9.21E-34    | 0.545169295 | 0.226 | 0.06  | 5.65E-29  | 3.77E+00    | macrophages    | SORL1      |
| KLC1       | 0           | 0.54512104  | 0.447 | 0.1   | 0         | 4.47        | spermatogonia  | KLC1       |
| CCDC86     | 0           | 0.545022782 | 0.581 | 0.147 | 0         | 3.952380952 | spermatocyte   | CCDC86     |
| HS6ST2     | 0           | 0.545017025 | 0.229 | 0.009 | 0         | 25.44444444 | Leydig_cells   | HS6ST2     |
| MVP        | 2.73E-206   | 0.544901467 | 0.207 | 0.041 | 1.67E-201 | 5.05E+00    | Sertoli_cells  | MVP        |
| BTF32      | 2.16E-50    | 0.544867028 | 0.827 | 0.713 | 1.33E-45  | 1.16E+00    | VSM_cells      | BTF3       |
| RPL282     | 2.73E-73    | 0.544777619 | 0.819 | 0.823 | 1.67E-68  | 9.95E-01    | Sertoli_cells  | RPL28      |
| TCEA2      | 0           | 0.544760956 | 0.844 | 0.378 | 0         | 2.232804233 | spermatocyte   | TCEA2      |
| EAF1       | 0           | 0.544693927 | 0.467 | 0.191 | 0         | 2.445026178 | spermatid      | EAF1       |
| EDF1       | 3.77E-111   | 0.544647052 | 0.709 | 0.528 | 2.31E-106 | 1.34E+00    | PTM_cells      | EDF1       |
| CHURC1     | 2.49E-38    | 0.544617171 | 0.554 | 0.347 | 1.52E-33  | 1.60E+00    | VSM_cells      | CHURC1     |
| ENAH1      | 7.93E-32    | 0.544347138 | 0.493 | 0.309 | 4.87E-27  | 1.60E+00    | VSM_cells      | ENAH       |
| GHITM      | 0           | 0.544322368 | 0.809 | 0.734 | 0         | 1.102179837 | spermatid      | GHITM      |
| RPL35A2    | 2.85E-168   | 0.5441928   | 0.933 | 0.868 | 1.75E-163 | 1.07E+00    | PTM_cells      | RPL35A     |
| SOHLH1     | 0           | 0.544142539 | 0.351 | 0.074 | 0         | 4.743243243 | spermatogonia  | SOHLH1     |
| BSDC1      | 0.005697429 | 0.544122497 | 0.42  | 0.302 | 1         | 1.390728477 | mastocyte      | BSDC1      |
| C1QTNF3    | 0           | 0.544104913 | 0.481 | 0.23  | 0         | 2.091304348 | spermatid      | C1QTNF3    |
| PCID2      | 0           | 0.544052049 | 0.785 | 0.268 | 0         | 2.929104478 | spermatocyte   | PCID2      |
| S100A8     | 0           | 0.543993193 | 0.381 | 0.092 | 0         | 4.141304348 | spermatid      | S100A8     |
| HNRNPAB    | 0           | 0.543895681 | 0.515 | 0.213 | 0         | 2.417840376 | spermatogonia  | HNRNPAB    |
| ZC3H14     | 0           | 0.543827331 | 0.978 | 0.596 | 0         | 1.640939597 | spermatocyte   | ZC3H14     |
| RPS6KA2    | 1.07E-95    | 0.543817125 | 0.375 | 0.089 | 6.55E-91  | 4.21E+00    | endotheliocyte | RPS6KA2    |
| RBMX1      | 1.38E-100   | 0.543630712 | 0.408 | 0.178 | 8.49E-96  | 2.29E+00    | Leydig_cells   | RBMX       |

|                |             |             |       |       |             |             |                |               |
|----------------|-------------|-------------|-------|-------|-------------|-------------|----------------|---------------|
| ZNF770         | 0           | 0.543356718 | 0.404 | 0.116 | 0           | 3.482758621 | spermatogonia  | ZNF770        |
| SPAG9          | 0           | 0.543291353 | 0.945 | 0.493 | 0           | 1.9168357   | spermatocyte   | SPAG9         |
| ASAH1          | 2.47E-83    | 0.543268395 | 0.395 | 0.116 | 1.51E-78    | 3.41E+00    | VSM_cells      | ASAH1         |
| ZFYVE212       | 1.46E-62    | 0.543111535 | 0.507 | 0.225 | 8.93E-58    | 2.25E+00    | VSM_cells      | ZFYVE21       |
| ARL6IP12       | 3.27E-30    | 0.543101239 | 0.485 | 0.465 | 2.01E-25    | 1.04E+00    | Sertoli_cells  | ARL6IP1       |
| MRPS22         | 0           | 0.543095525 | 0.809 | 0.242 | 0           | 3.342975207 | spermatocyte   | MRPS22        |
| RPL224         | 3.43E-36    | 0.543077524 | 0.627 | 0.65  | 2.11E-31    | 9.65E-01    | Sertoli_cells  | RPL22         |
| RPS141         | 8.15E-22    | 0.54294608  | 0.869 | 0.831 | 5.00E-17    | 1.05E+00    | macrophages    | RPS14         |
| RP11.475C16.11 | 7.12E-11    | 0.542800811 | 0.233 | 0.186 | 4.37E-06    | 1.25E+00    | Leydig_cells   | RP11.475C16.1 |
| IQCK           | 0           | 0.542709312 | 0.798 | 0.245 | 0           | 3.257142857 | spermatocyte   | IQCK          |
| VWA1           | 5.12E-173   | 0.542700543 | 0.308 | 0.035 | 3.14E-168   | 8.80E+00    | endotheliocyte | VWA1          |
| TMEM215        | 0           | 0.542613419 | 0.353 | 0.059 | 0           | 5.983050847 | spermatid      | TMEM215       |
| UQCRH1         | 1.93E-48    | 0.542574493 | 0.655 | 0.434 | 1.19E-43    | 1.51E+00    | VSM_cells      | UQCRH         |
| RSPH9          | 0           | 0.542531739 | 0.804 | 0.248 | 0           | 3.241935484 | spermatocyte   | RSPH9         |
| DCC            | 0           | 0.542494792 | 0.457 | 0.156 | 0           | 2.929487179 | spermatid      | DCC           |
| CFDP1          | 4.56E-287   | 0.542481396 | 0.591 | 0.411 | 2.80E-282   | 1.44E+00    | spermatogonia  | CFDP1         |
| PARD6A         | 0           | 0.542463866 | 0.44  | 0.226 | 0           | 1.946902655 | spermatid      | PARD6A        |
| RARRES22       | 1.10E-92    | 0.542435557 | 0.345 | 0.082 | 6.76E-88    | 4.21E+00    | VSM_cells      | RARRES2       |
| CTSD           | 5.45E-15    | 0.542356643 | 0.31  | 0.159 | 3.35E-10    | 1.95E+00    | macrophages    | CTSD          |
| PCSK7          | 2.90E-36    | 0.542356165 | 0.408 | 0.21  | 1.78E-31    | 1.94E+00    | VSM_cells      | PCSK7         |
| SYNGR1         | 7.20E-49    | 0.542339692 | 0.456 | 0.336 | 4.42E-44    | 1.36E+00    | Leydig_cells   | SYNGR1        |
| ETHE1          | 4.79E-06    | 0.542033037 | 0.158 | 0.032 | 0.293934212 | 4.9375      | T_cells        | ETHE1         |
| CCDC1121       | 0.00074237  | 0.542015857 | 0.46  | 0.281 | 1           | 1.637010676 | mastocyte      | CCDC112       |
| MT-ND6         | 1.42E-66    | 0.541978394 | 0.334 | 0.101 | 8.69E-62    | 3.31E+00    | VSM_cells      | MT-ND6        |
| THAP7          | 0           | 0.541834053 | 0.451 | 0.188 | 0           | 2.39893617  | spermatogonia  | THAP7         |
| CDC42EP41      | 1.30E-267   | 0.541822899 | 0.208 | 0.032 | 7.96E-263   | 6.50E+00    | Sertoli_cells  | CDC42EP4      |
| RAC14          | 3.09E-129   | 0.541731265 | 0.634 | 0.367 | 1.90E-124   | 1.73E+00    | PTM_cells      | RAC1          |
| CXCR3          | 4.81E-233   | 0.541644992 | 0.132 | 0     | 2.95E-228   | #DIV/0!     | T_cells        | CXCR3         |
| AC008132.13    | 1.19E-17    | 0.541584764 | 0.166 | 0.132 | 7.27E-13    | 1.26E+00    | spermatogonia  | AC008132.13   |
| MORC2.AS1      | 0           | 0.541500484 | 0.314 | 0.105 | 0           | 2.99047619  | spermatocyte   | MORC2.AS1     |
| GAA            | 0           | 0.541360776 | 0.729 | 0.234 | 0           | 3.115384615 | spermatocyte   | GAA           |
| MRGBP          | 0           | 0.541354275 | 0.926 | 0.441 | 0           | 2.099773243 | spermatocyte   | MRGBP         |
| RBM32          | 1.11E-24    | 0.541208702 | 0.458 | 0.226 | 6.80E-20    | 2.03E+00    | macrophages    | RBM3          |
| OCIAD2         | 8.68E-262   | 0.541154607 | 0.328 | 0.027 | 5.32E-257   | 1.21E+01    | endotheliocyte | OCIAD2        |
| PPP3R21        | 0.000182583 | 0.541051234 | 0.76  | 0.588 | 1           | 1.292517007 | mastocyte      | PPP3R2        |
| ADAMTSL4       | 0           | 0.541050533 | 0.226 | 0.015 | 0           | 15.06666667 | Leydig_cells   | ADAMTSL4      |
| RP11.113D6.10  | 0           | 0.541024589 | 0.322 | 0.075 | 0           | 4.293333333 | spermatocyte   | RP11.113D6.10 |
| DENR           | 0           | 0.541011964 | 0.382 | 0.094 | 0           | 4.063829787 | spermatogonia  | DENR          |
| TAGLN22        | 4.21E-107   | 0.540890738 | 0.45  | 0.203 | 2.58E-102   | 2.22E+00    | Leydig_cells   | TAGLN2        |
| TBC1D15        | 0           | 0.540860293 | 0.872 | 0.302 | 0           | 2.887417219 | spermatocyte   | TBC1D15       |
| ZNF451         | 0           | 0.540832754 | 0.596 | 0.433 | 0           | 1.376443418 | spermatid      | ZNF451        |
| THYN1          | 0           | 0.540798441 | 0.486 | 0.224 | 0           | 2.169642857 | spermatogonia  | THYN1         |
| NRGN           | 2.73E-67    | 0.540734031 | 0.258 | 0.065 | 1.68E-62    | 3.97E+00    | VSM_cells      | NRGN          |
| TGIF1          | 1.59E-07    | 0.540588299 | 0.259 | 0.173 | 0.009747878 | 1.497109827 | macrophages    | TGIF1         |
| MTND2P28       | 0           | 0.5405499   | 0.267 | 0.083 | 0           | 3.21686747  | spermatogonia  | MTND2P28      |
| DHFR           | 0           | 0.540499658 | 0.442 | 0.203 | 0           | 2.177339901 | spermatogonia  | DHFR          |
| PRKCH          | 5.06E-118   | 0.540410348 | 0.347 | 0.065 | 3.10E-113   | 5.34E+00    | endotheliocyte | PRKCH         |
| SPON21         | 5.66E-07    | 0.540270574 | 0.132 | 0.02  | 0.034694032 | 6.6         | T_cells        | SPON2         |
| LRP1           | 2.37E-29    | 0.540252    | 0.259 | 0.084 | 1.45E-24    | 3.08E+00    | macrophages    | LRP1          |
| EEF1D1         | 4.44E-97    | 0.540198103 | 0.769 | 0.624 | 2.72E-92    | 1.23E+00    | Leydig_cells   | EEF1D         |
| KATNAL2        | 0           | 0.540197034 | 0.716 | 0.135 | 0           | 5.303703704 | spermatocyte   | KATNAL2       |
| EFHD1          | 3.27E-59    | 0.540186317 | 0.397 | 0.16  | 2.00E-54    | 2.48E+00    | VSM_cells      | EFHD1         |
| MT.RNR1        | 5.90E-31    | 0.540152057 | 0.535 | 0.28  | 3.62E-26    | 1.91E+00    | macrophages    | MT.RNR1       |
| SNRNP40        | 0           | 0.540046554 | 0.423 | 0.113 | 0           | 3.743362832 | spermatogonia  | SNRNP40       |
| NEDD81         | 0.000189123 | 0.540039909 | 0.369 | 0.422 | 1           | 0.874407583 | Sertoli_cells  | NEDD8         |
| PHACTR21       | 1.05E-184   | 0.540008068 | 0.313 | 0.074 | 6.46E-180   | 4.23E+00    | Leydig_cells   | PHACTR2       |
| USP22          | 1.79E-40    | 0.539957572 | 0.296 | 0.196 | 1.10E-35    | 1.51E+00    | Sertoli_cells  | USP22         |
| MYADM3         | 2.10E-53    | 0.539745526 | 0.48  | 0.219 | 1.29E-48    | 2.19E+00    | VSM_cells      | MYADM         |
| TMEM14C        | 1.29E-141   | 0.539673648 | 0.456 | 0.175 | 7.94E-137   | 2.61E+00    | Leydig_cells   | TMEM14C       |
| PTCH21         | 2.08E-254   | 0.539637124 | 0.342 | 0.073 | 1.27E-249   | 4.68E+00    | PTM_cells      | PTCH2         |
| SNHG81         | 2.69E-131   | 0.539528625 | 0.549 | 0.297 | 1.65E-126   | 1.85E+00    | PTM_cells      | SNHG8         |
| RPS123         | 1.40E-211   | 0.539520935 | 0.93  | 0.829 | 8.59E-207   | 1.12E+00    | PTM_cells      | RPS12         |
| HSF2           | 1.04E-252   | 0.539422478 | 0.418 | 0.235 | 6.37E-248   | 1.78E+00    | spermatogonia  | HSF2          |
| PHB            | 2.30E-36    | 0.539330824 | 0.257 | 0.163 | 1.41E-31    | 1.58E+00    | Sertoli_cells  | PHB           |
| MEPCE          | 0           | 0.539129739 | 0.734 | 0.231 | 0           | 3.177489177 | spermatocyte   | MEPCE         |
| PTN1           | 1.06E-124   | 0.539116461 | 0.391 | 0.159 | 6.48E-120   | 2.46E+00    | PTM_cells      | PTN           |
| NLRP1          | 0           | 0.539067815 | 0.659 | 0.335 | 0           | 1.967164179 | spermatocyte   | NLRP1         |
| 15-Sep         | 0           | 0.539047096 | 0.789 | 0.279 | 0           | 2.827956989 | spermatocyte   | 15-Sep        |
| LINC00467      | 0           | 0.539044331 | 0.958 | 0.845 | 0           | 1.133727811 | spermatid      | LINC00467     |
| TRBC2          | 1.31E-244   | 0.53891482  | 0.233 | 0.033 | 8.05E-240   | 7.06E+00    | Leydig_cells   | TRBC2         |
| TCEAL9         | 0           | 0.538853639 | 0.198 | 0.023 | 0           | 8.608695652 | Sertoli_cells  | TCEAL9        |
| FAM198B1       | 1.26E-172   | 0.538811859 | 0.255 | 0.054 | 7.73E-168   | 4.72E+00    | Leydig_cells   | FAM198B       |
| NRP11          | 1.01E-178   | 0.538750598 | 0.271 | 0.03  | 6.22E-174   | 9.03E+00    | VSM_cells      | NRP1          |
| TXN21          | 1.86E-12    | 0.538617159 | 0.316 | 0.297 | 1.14E-07    | 1.06E+00    | Sertoli_cells  | TXN2          |
| TRIM44         | 0           | 0.53858896  | 0.45  | 0.155 | 0           | 2.903225806 | spermatogonia  | TRIM44        |

|              |             |             |       |       |             |             |                |              |
|--------------|-------------|-------------|-------|-------|-------------|-------------|----------------|--------------|
| SPTAN1       | 1.90E-25    | 0.538580494 | 0.504 | 0.323 | 1.16E-20    | 1.56E+00    | endotheliocyte | SPTAN1       |
| KDR          | 0           | 0.538573441 | 0.246 | 0.003 | 0           | 82          | endotheliocyte | KDR          |
| LINC01249    | 0           | 0.538553899 | 0.706 | 0.134 | 0           | 5.268656716 | spermatocyte   | LINC01249    |
| ITM2B4       | 8.09E-100   | 0.538492442 | 0.767 | 0.319 | 4.96E-95    | 2.40E+00    | VSM_cells      | ITM2B        |
| TMEM14C1     | 6.86E-230   | 0.538452822 | 0.518 | 0.169 | 4.21E-225   | 3.07E+00    | PTM_cells      | TMEM14C      |
| NR4A2        | 7.70E-72    | 0.538397242 | 0.447 | 0.146 | 4.73E-67    | 3.06E+00    | endotheliocyte | NR4A2        |
| TDRD1        | 0           | 0.538389006 | 0.403 | 0.135 | 0           | 2.985185185 | spermatogonia  | TDRD1        |
| KLF63        | 2.53E-181   | 0.538264108 | 0.598 | 0.276 | 1.55E-176   | 2.17E+00    | PTM_cells      | KLF6         |
| MGC39584     | 0           | 0.538202599 | 0.431 | 0.153 | 0           | 2.816993464 | spermatid      | MGC39584     |
| ITSN2        | 1.03E-12    | 0.538188746 | 0.269 | 0.142 | 6.32E-08    | 1.89E+00    | macrophages    | ITSN2        |
| IER5L        | 0           | 0.538177371 | 0.327 | 0.05  | 0           | 6.54        | PTM_cells      | IER5L        |
| RP5.991B18.2 | 0           | 0.538131088 | 0.287 | 0.108 | 0           | 2.657407407 | spermatid      | RP5.991B18.2 |
| PMS1         | 0           | 0.538024958 | 0.634 | 0.371 | 0           | 1.708894879 | spermatid      | PMS1         |
| HDDC2        | 0           | 0.538021929 | 0.543 | 0.353 | 0           | 1.538243626 | spermatogonia  | HDDC2        |
| IPO8         | 0           | 0.537981695 | 0.687 | 0.154 | 0           | 4.461038961 | spermatocyte   | IPO8         |
| USP9X        | 0           | 0.537969811 | 0.372 | 0.155 | 0           | 2.4         | spermatogonia  | USP9X        |
| LINC00935    | 0           | 0.537921291 | 0.435 | 0.158 | 0           | 2.753164557 | spermatid      | LINC00935    |
| MBP          | 0.000267374 | 0.537863736 | 0.237 | 0.087 | 1           | 2.724137931 | T_cells        | MBP          |
| DHRS7        | 2.73E-296   | 0.537829418 | 0.304 | 0.046 | 1.68E-291   | 6.61E+00    | Leydig_cells   | DHRS7        |
| FUS          | 0           | 0.537811245 | 0.741 | 0.59  | 0           | 1.255932203 | spermatogonia  | FUS          |
| TEKT3        | 0           | 0.537737353 | 0.553 | 0.311 | 0           | 1.778135048 | spermatid      | TEKT3        |
| GCSH         | 2.11E-175   | 0.537701326 | 0.469 | 0.19  | 1.30E-170   | 2.47E+00    | PTM_cells      | GCSH         |
| GDI1         | 0           | 0.53762808  | 0.342 | 0.09  | 0           | 3.8         | spermatogonia  | GDI1         |
| FAM9B        | 0           | 0.53738093  | 0.262 | 0.008 | 0           | 32.75       | spermatogonia  | FAM9B        |
| UQCRFS1      | 0           | 0.53734788  | 0.909 | 0.449 | 0           | 2.024498886 | spermatocyte   | UQCRFS1      |
| SLC25A28     | 0           | 0.537293591 | 0.89  | 0.336 | 0           | 2.648809524 | spermatocyte   | SLC25A28     |
| ANKDD1A      | 1.10E-306   | 0.537223622 | 0.252 | 0.031 | 6.73E-302   | 8.13E+00    | Leydig_cells   | ANKDD1A      |
| TAX1BP3      | 1.65E-125   | 0.537179036 | 0.326 | 0.108 | 1.01E-120   | 3.02E+00    | Leydig_cells   | TAX1BP3      |
| ILK          | 3.83E-104   | 0.537054097 | 0.493 | 0.283 | 2.35E-99    | 1.74E+00    | PTM_cells      | ILK          |
| MIDN2        | 7.36E-67    | 0.536945169 | 0.373 | 0.192 | 4.51E-62    | 1.94E+00    | Leydig_cells   | MIDN         |
| BTF33        | 0.000210951 | 0.536925556 | 0.816 | 0.714 | 1           | 1.142857143 | T_cells        | BTF3         |
| CYB5R32      | 6.77E-67    | 0.53683599  | 0.533 | 0.225 | 4.15E-62    | 2.37E+00    | VSM_cells      | CYB5R3       |
| RANBP1       | 0           | 0.536775722 | 0.761 | 0.612 | 0           | 1.243464052 | spermatogonia  | RANBP1       |
| ANXA13       | 9.18E-125   | 0.53673085  | 0.378 | 0.077 | 5.63E-120   | 4.91E+00    | VSM_cells      | ANXA1        |
| UBL51        | 1.85E-17    | 0.536649551 | 0.543 | 0.581 | 1.14E-12    | 9.35E-01    | Sertoli_cells  | UBL5         |
| ARL6IP54     | 5.05E-67    | 0.536274936 | 0.493 | 0.2   | 3.10E-62    | 2.47E+00    | VSM_cells      | ARL6IP5      |
| BAZ1A        | 0           | 0.536249135 | 0.731 | 0.599 | 0           | 1.220367279 | spermatid      | BAZ1A        |
| MYL12B2      | 0.00932517  | 0.536230278 | 0.632 | 0.626 | 1           | 1.009584665 | T_cells        | MYL12B       |
| TMEM217      | 0           | 0.536196009 | 0.632 | 0.105 | 0           | 6.019047619 | spermatocyte   | TMEM217      |
| UBXN1        | 0           | 0.536141249 | 0.705 | 0.547 | 0           | 1.288848263 | spermatogonia  | UBXN1        |
| RASSF9       | 0           | 0.536032793 | 0.295 | 0.004 | 0           | 73.75       | endotheliocyte | RASSF9       |
| PRRX2-AS1    | 0           | 0.53602951  | 0.333 | 0.125 | 0           | 2.664       | spermatid      | PRRX2-AS1    |
| ITPR2        | 9.80E-32    | 0.535905742 | 0.192 | 0.048 | 6.01E-27    | 4.00E+00    | macrophages    | ITPR2        |
| RPL275       | 1.13E-40    | 0.535858736 | 0.639 | 0.664 | 6.96E-36    | 9.62E-01    | Sertoli_cells  | RPL27        |
| C4orf36      | 0           | 0.535780684 | 0.401 | 0.099 | 0           | 4.050505051 | spermatid      | C4orf36      |
| WDR83OS      | 1.25E-67    | 0.535705133 | 0.583 | 0.239 | 7.64E-63    | 2.44E+00    | endotheliocyte | WDR83OS      |
| SIN3B1       | 5.05E-140   | 0.535668392 | 0.402 | 0.156 | 3.10E-135   | 2.58E+00    | PTM_cells      | SIN3B        |
| KLHDC9       | 0           | 0.535646646 | 0.906 | 0.398 | 0           | 2.27638191  | spermatocyte   | KLHDC9       |
| OSBPL8       | 7.76E-297   | 0.535536166 | 0.44  | 0.234 | 4.76E-292   | 1.88E+00    | spermatogonia  | OSBPL8       |
| SVIP         | 0           | 0.535481011 | 0.884 | 0.479 | 0           | 1.845511482 | spermatocyte   | SVIP         |
| CBLN1        | 0           | 0.535409294 | 0.82  | 0.294 | 0           | 2.789115646 | spermatocyte   | CBLN1        |
| MT1A         | 3.56E-226   | 0.535355875 | 0.219 | 0.031 | 2.18E-221   | 7.06E+00    | Leydig_cells   | MT1A         |
| GBP2         | 2.75E-08    | 0.535180752 | 0.209 | 0.121 | 0.001686847 | 1.727272727 | macrophages    | GBP2         |
| SLC25A3      | 0           | 0.535175372 | 0.66  | 0.378 | 0           | 1.746031746 | spermatogonia  | SLC25A3      |
| FLNA         | 4.10E-118   | 0.535044662 | 0.494 | 0.114 | 2.51E-113   | 4.33E+00    | endotheliocyte | FLNA         |
| EIF4G2       | 0           | 0.535017986 | 0.787 | 0.664 | 0           | 1.185240964 | spermatogonia  | EIF4G2       |
| PAIP2B       | 0           | 0.53498456  | 0.587 | 0.139 | 0           | 4.223021583 | spermatocyte   | PAIP2B       |
| MRPS10       | 0           | 0.534959269 | 0.482 | 0.166 | 0           | 2.903614458 | spermatogonia  | MRPS10       |
| RPS271       | 4.67E-118   | 0.534924212 | 0.919 | 0.818 | 2.87E-113   | 1.12E+00    | PTM_cells      | RPS27        |
| AC016739.21  | 3.33E-51    | 0.53475591  | 0.177 | 0.066 | 2.05E-46    | 2.68E+00    | Leydig_cells   | AC016739.2   |
| SPTAN11      | 2.17E-19    | 0.534703492 | 0.358 | 0.323 | 1.33E-14    | 1.11E+00    | Sertoli_cells  | SPTAN1       |
| HLA-A1       | 0.003583398 | 0.534672846 | 0.333 | 0.309 | 1           | 1.077669903 | macrophages    | HLA-A        |
| HTRA1        | 5.78E-138   | 0.534652795 | 0.362 | 0.059 | 3.54E-133   | 6.14E+00    | endotheliocyte | HTRA1        |
| ALDH7A1      | 3.05E-112   | 0.534627525 | 0.211 | 0.068 | 1.87E-107   | 3.10E+00    | Sertoli_cells  | ALDH7A1      |
| AIF1L        | 2.70E-163   | 0.534563513 | 0.335 | 0.044 | 1.66E-158   | 7.61E+00    | endotheliocyte | AIF1L        |
| DYNC1H1      | 0           | 0.534530778 | 0.574 | 0.277 | 0           | 2.072202166 | spermatogonia  | DYNC1H1      |
| YWHAB4       | 4.23E-41    | 0.534487931 | 0.438 | 0.348 | 2.59E-36    | 1.26E+00    | Sertoli_cells  | YWHAB        |
| CCDC82       | 0           | 0.534416    | 0.744 | 0.372 | 0           | 2           | spermatocyte   | CCDC82       |
| LRG1         | 0           | 0.534354025 | 0.191 | 0.002 | 0           | 95.5        | endotheliocyte | LRG1         |
| RAC12        | 4.28E-13    | 0.534190085 | 0.502 | 0.379 | 2.63E-08    | 1.32E+00    | macrophages    | RAC1         |
| PWRN1        | 0           | 0.534059359 | 0.477 | 0.166 | 0           | 2.873493976 | spermatid      | PWRN1        |
| USP8         | 0           | 0.534015182 | 0.863 | 0.318 | 0           | 2.713836478 | spermatocyte   | USP8         |
| SERTAD14     | 0.001102569 | 0.534011375 | 0.211 | 0.077 | 1           | 2.74025974  | T_cells        | SERTAD1      |
| WDR74        | 1.80E-119   | 0.533975809 | 0.352 | 0.257 | 1.11E-114   | 1.37E+00    | spermatid      | WDR74        |
| APOPT1       | 0           | 0.533966592 | 0.692 | 0.568 | 0           | 1.218309859 | spermatid      | APOPT1       |

|               |             |             |       |       |            |             |                |               |
|---------------|-------------|-------------|-------|-------|------------|-------------|----------------|---------------|
| ADI1          | 2.34E-230   | 0.533956336 | 0.424 | 0.123 | 1.44E-225  | 3.45E+00    | PTM_cells      | ADI1          |
| METRNL        | 2.26E-13    | 0.533864041 | 0.259 | 0.135 | 1.39E-08   | 1.92E+00    | macrophages    | METRNL        |
| AC079779.5    | 0           | 0.533828171 | 0.387 | 0.083 | 0          | 4.662650602 | spermatid      | AC079779.5    |
| MMP28         | 1.77E-209   | 0.533824953 | 0.35  | 0.039 | 1.09E-204  | 8.97E+00    | endotheliocyte | MMP28         |
| PCDH18        | 0           | 0.533811271 | 0.215 | 0.02  | 0          | 10.75       | Leydig_cells   | PCDH18        |
| C9orf173      | 0           | 0.533806138 | 0.346 | 0.133 | 0          | 2.601503759 | spermatid      | C9orf173      |
| CNPY3         | 0           | 0.533723067 | 0.762 | 0.21  | 0          | 3.628571429 | spermatocyte   | CNPY3         |
| PHACTR2.AS1   | 0           | 0.533645898 | 0.28  | 0.098 | 0          | 2.857142857 | spermatid      | PHACTR2.AS1   |
| C1orf185      | 0           | 0.533633291 | 0.528 | 0.298 | 0          | 1.771812081 | spermatid      | C1orf185      |
| MGLL1         | 6.20E-127   | 0.533598699 | 0.345 | 0.066 | 3.81E-122  | 5.23E+00    | VSM_cells      | MGLL1         |
| SLC51A1       | 0           | 0.533438334 | 0.391 | 0.078 | 0          | 5.012820513 | PTM_cells      | SLC51A1       |
| RP11.864N7.2  | 3.27E-06    | 0.533381373 | 0.276 | 0.197 | 0.20062941 | 1.401015228 | macrophages    | RP11.864N7.2  |
| AHDC1         | 6.69E-155   | 0.533360302 | 0.245 | 0.054 | 4.11E-150  | 4.54E+00    | Leydig_cells   | AHDC1         |
| CUTC          | 0           | 0.533261159 | 0.613 | 0.184 | 0          | 3.331521739 | spermatocyte   | CUTC          |
| CEP78         | 0           | 0.533175917 | 0.453 | 0.159 | 0          | 2.849056604 | spermatogonia  | CEP78         |
| ARGLU1        | 0           | 0.533153209 | 0.623 | 0.364 | 0          | 1.711538462 | spermatogonia  | ARGLU1        |
| DGKH          | 1.82E-34    | 0.53313654  | 0.304 | 0.134 | 1.12E-29   | 2.27E+00    | VSM_cells      | DGKH          |
| DYNLRB11      | 6.43E-41    | 0.533129914 | 0.56  | 0.355 | 3.95E-36   | 1.58E+00    | VSM_cells      | DYNLRB11      |
| PPIA5         | 1.41E-52    | 0.533007259 | 0.816 | 0.624 | 8.64E-48   | 1.31E+00    | VSM_cells      | PPIA5         |
| TSPO2         | 3.56E-207   | 0.532979826 | 0.352 | 0.081 | 2.19E-202  | 4.35E+00    | Leydig_cells   | TSPO2         |
| MAP4K4        | 0           | 0.532944747 | 0.423 | 0.199 | 0          | 2.125628141 | spermatogonia  | MAP4K4        |
| RPL35A3       | 7.22E-06    | 0.532913406 | 0.921 | 0.871 | 0.44281738 | 1.057405281 | T_cells        | RPL35A3       |
| EGR2          | 9.83E-16    | 0.532577244 | 0.185 | 0.07  | 6.03E-11   | 2.64E+00    | macrophages    | EGR2          |
| DKK3          | 2.43E-50    | 0.532527566 | 0.433 | 0.194 | 1.49E-45   | 2.23E+00    | VSM_cells      | DKK3          |
| LTC4S         | 0           | 0.53247838  | 0.315 | 0.01  | 0          | 31.5        | endotheliocyte | LTC4S         |
| RAB34         | 2.53E-294   | 0.532434928 | 0.323 | 0.052 | 1.55E-289  | 6.21E+00    | Leydig_cells   | RAB34         |
| RBM3          | 0           | 0.532391249 | 0.419 | 0.175 | 0          | 2.394285714 | spermatogonia  | RBM3          |
| IK            | 0           | 0.532245416 | 0.971 | 0.535 | 0          | 1.814953271 | spermatocyte   | IK            |
| PRKCE         | 0           | 0.532154139 | 0.458 | 0.122 | 0          | 3.754098361 | spermatid      | PRKCE         |
| PSME11        | 6.60E-28    | 0.532140808 | 0.276 | 0.096 | 4.05E-23   | 2.88E+00    | macrophages    | PSME11        |
| GPR135        | 0           | 0.532111872 | 0.582 | 0.37  | 0          | 1.572972973 | spermatid      | GPR135        |
| CDC423        | 3.39E-23    | 0.531987673 | 0.439 | 0.416 | 2.08E-18   | 1.06E+00    | Sertoli_cells  | CDC423        |
| MRPL16        | 4.82E-05    | 0.531942617 | 0.225 | 0.219 | 1          | 1.02739726  | Sertoli_cells  | MRPL16        |
| RBM391        | 6.99E-38    | 0.531861938 | 0.692 | 0.476 | 4.29E-33   | 1.45E+00    | endotheliocyte | RBM391        |
| RP11-597D13.8 | 2.01E-172   | 0.531695144 | 0.38  | 0.248 | 1.24E-167  | 1.53E+00    | spermatid      | RP11-597D13.8 |
| FCGR3A1       | 2.75E-26    | 0.531656187 | 0.132 | 0.005 | 1.69E-21   | 2.64E+01    | T_cells        | FCGR3A1       |
| NEDD9         | 3.05E-170   | 0.531605618 | 0.323 | 0.04  | 1.87E-165  | 8.08E+00    | endotheliocyte | NEDD9         |
| TEK           | 0           | 0.531551999 | 0.295 | 0.005 | 0          | 59          | endotheliocyte | TEK           |
| RPL151        | 1.79E-61    | 0.531442962 | 0.958 | 0.902 | 1.10E-56   | 1.06E+00    | VSM_cells      | RPL151        |
| C9orf153      | 0           | 0.531418001 | 0.474 | 0.197 | 0          | 2.406091371 | spermatid      | C9orf153      |
| SEMA6C        | 0           | 0.531287821 | 0.219 | 0.031 | 0          | 7.064516129 | Sertoli_cells  | SEMA6C        |
| ADORA1        | 0           | 0.531185617 | 0.195 | 0.004 | 0          | 48.75       | Sertoli_cells  | ADORA1        |
| TSPAN4        | 6.65E-141   | 0.531141206 | 0.404 | 0.071 | 4.08E-136  | 5.69E+00    | endotheliocyte | TSPAN4        |
| SLC25A32      | 5.86E-47    | 0.531083984 | 0.697 | 0.436 | 3.60E-42   | 1.60E+00    | endotheliocyte | SLC25A32      |
| FKBP9         | 5.55E-258   | 0.53103768  | 0.243 | 0.034 | 3.41E-253  | 7.15E+00    | Leydig_cells   | FKBP9         |
| RPL35A1       | 3.32E-142   | 0.530919391 | 0.944 | 0.868 | 2.04E-137  | 1.09E+00    | Leydig_cells   | RPL35A1       |
| MT-ND4L       | 2.94E-105   | 0.530751402 | 0.427 | 0.175 | 1.80E-100  | 2.44E+00    | Leydig_cells   | MT-ND4L       |
| PHOSPHO2      | 0           | 0.530620771 | 0.714 | 0.202 | 0          | 3.534653465 | spermatocyte   | PHOSPHO2      |
| DOC2A         | 0           | 0.530519438 | 0.478 | 0.204 | 0          | 2.343137255 | spermatid      | DOC2A         |
| PEG3          | 1.97E-34    | 0.530505493 | 0.391 | 0.272 | 1.21E-29   | 1.44E+00    | Leydig_cells   | PEG3          |
| RPL18A        | 0           | 0.530445024 | 0.661 | 0.351 | 0          | 1.883190883 | spermatogonia  | RPL18A        |
| CD91          | 3.09E-23    | 0.530176921 | 0.256 | 0.094 | 1.90E-18   | 2.72E+00    | macrophages    | CD91          |
| ARHGAP29      | 5.80E-32    | 0.530116175 | 0.499 | 0.286 | 3.56E-27   | 1.74E+00    | endotheliocyte | ARHGAP29      |
| NDUFB7        | 4.00E-38    | 0.530071271 | 0.626 | 0.445 | 2.46E-33   | 1.41E+00    | VSM_cells      | NDUFB7        |
| TYROBP        | 0.000446872 | 0.530066976 | 0.079 | 0.013 | 1          | 6.076923077 | T_cells        | TYROBP        |
| PNRC2         | 2.14E-46    | 0.530006281 | 0.459 | 0.206 | 1.31E-41   | 2.23E+00    | endotheliocyte | PNRC2         |
| LINC00654     | 0           | 0.529974167 | 0.722 | 0.208 | 0          | 3.471153846 | spermatocyte   | LINC00654     |
| RP11.347H15.5 | 0           | 0.529951962 | 0.264 | 0.094 | 0          | 2.808510638 | spermatid      | RP11.347H15.5 |
| OS9           | 6.02E-11    | 0.529874012 | 0.316 | 0.198 | 3.69E-06   | 1.60E+00    | macrophages    | OS9           |
| CHTOP         | 0           | 0.529849722 | 0.546 | 0.27  | 0          | 2.022222222 | spermatogonia  | CHTOP         |
| MYH9          | 0.002482454 | 0.529845354 | 0.316 | 0.164 | 1          | 1.926829268 | T_cells        | MYH9          |
| PPDPF         | 1.27E-38    | 0.529822815 | 0.624 | 0.443 | 7.79E-34   | 1.41E+00    | VSM_cells      | PPDPF         |
| MIF1          | 1.97E-15    | 0.529789255 | 0.226 | 0.173 | 1.21E-10   | 1.31E+00    | Sertoli_cells  | MIF1          |
| CBR11         | 1.01E-293   | 0.529771022 | 0.416 | 0.098 | 6.19E-289  | 4.24E+00    | PTM_cells      | CBR11         |
| RAC21         | 2.35E-39    | 0.529762145 | 0.14  | 0.005 | 1.44E-34   | 2.80E+01    | mastocyte      | RAC21         |
| AMDHD2        | 0           | 0.52974715  | 0.782 | 0.198 | 0          | 3.949494949 | spermatocyte   | AMDHD2        |
| TEX14         | 0           | 0.529738236 | 0.403 | 0.129 | 0          | 3.124031008 | spermatogonia  | TEX14         |
| ESAM1         | 0           | 0.529699658 | 0.294 | 0.019 | 0          | 15.47368421 | VSM_cells      | ESAM1         |
| CALM3         | 0           | 0.529613159 | 0.995 | 0.824 | 0          | 1.207524272 | spermatocyte   | CALM3         |
| SPATS2        | 0           | 0.5294927   | 0.591 | 0.351 | 0          | 1.683760684 | spermatogonia  | SPATS2        |
| CENPV1        | 1.92E-29    | 0.5294842   | 0.273 | 0.19  | 1.18E-24   | 1.44E+00    | Sertoli_cells  | CENPV1        |
| NUP188        | 0           | 0.529472495 | 0.62  | 0.262 | 0          | 2.366412214 | spermatocyte   | NUP188        |
| SULF1         | 0           | 0.529452537 | 0.467 | 0.181 | 0          | 2.580110497 | spermatid      | SULF1         |
| RPL321        | 5.20E-125   | 0.529384093 | 0.943 | 0.886 | 3.19E-120  | 1.06E+00    | Leydig_cells   | RPL321        |
| ST6GAL1       | 0           | 0.529374329 | 0.313 | 0.005 | 0          | 62.6        | endotheliocyte | ST6GAL1       |



|           |             |             |       |       |             |             |                |           |
|-----------|-------------|-------------|-------|-------|-------------|-------------|----------------|-----------|
| ARL6IP4   | 6.47E-51    | 0.529357436 | 0.662 | 0.399 | 3.97E-46    | 1.66E+00    | VSM_cells      | ARL6IP4   |
| VKORC12   | 2.80E-71    | 0.529259025 | 0.243 | 0.109 | 1.72E-66    | 2.23E+00    | Sertoli_cells  | VKORC1    |
| RPS13P2   | 4.46E-05    | 0.529010305 | 0.283 | 0.221 | 1           | 1.280542986 | macrophages    | RPS13P2   |
| RGMA      | 1.13E-129   | 0.529005054 | 0.274 | 0.075 | 6.93E-125   | 3.65E+00    | Leydig_cells   | RGMA      |
| RPS291    | 1.08E-31    | 0.52899503  | 0.906 | 0.886 | 6.60E-27    | 1.02E+00    | macrophages    | RPS29     |
| PLBD2     | 0           | 0.528839103 | 0.503 | 0.28  | 0           | 1.796428571 | spermatid      | PLBD2     |
| HSPA81    | 1.77E-20    | 0.528794941 | 0.7   | 0.565 | 1.09E-15    | 1.24E+00    | macrophages    | HSPA8     |
| KMT2E     | 2.09E-34    | 0.528779102 | 0.581 | 0.377 | 1.28E-29    | 1.54E+00    | endotheliocyte | KMT2E     |
| MRPS9     | 0           | 0.528685661 | 0.74  | 0.22  | 0           | 3.363636364 | spermatocyte   | MRPS9     |
| SEC63     | 0           | 0.528654844 | 0.63  | 0.429 | 0           | 1.468531469 | spermatogonia  | SEC63     |
| FGL21     | 2.47E-168   | 0.528529553 | 0.249 | 0.053 | 1.52E-163   | 4.70E+00    | Leydig_cells   | FGL2      |
| FTL5      | 4.55E-07    | 0.528412747 | 0.789 | 0.528 | 0.027896433 | 1.494318182 | T_cells        | FTL       |
| FAM104A   | 0           | 0.528355673 | 0.805 | 0.658 | 0           | 1.223404255 | spermatid      | FAM104A   |
| CATSPER2  | 0           | 0.52826884  | 0.801 | 0.232 | 0           | 3.452586207 | spermatocyte   | CATSPER2  |
| NEDD8     | 1.09E-102   | 0.528190446 | 0.608 | 0.408 | 6.69E-98    | 1.49E+00    | PTM_cells      | NEDD8     |
| UBE2K     | 0           | 0.52816478  | 0.861 | 0.365 | 0           | 2.35890411  | spermatocyte   | UBE2K     |
| EEF2KMT   | 0           | 0.528049991 | 0.426 | 0.16  | 0           | 2.6625      | spermatid      | EEF2KMT   |
| CCDC109B  | 2.76E-05    | 0.528024677 | 0.184 | 0.047 | 1           | 3.914893617 | T_cells        | CCDC109B  |
| RPS193    | 1.37E-140   | 0.527894719 | 0.875 | 0.754 | 8.41E-136   | 1.16E+00    | Leydig_cells   | RPS19     |
| RSRP1     | 2.56E-43    | 0.527866177 | 0.531 | 0.278 | 1.57E-38    | 1.91E+00    | endotheliocyte | RSRP1     |
| POLR3C    | 0           | 0.527851917 | 0.554 | 0.369 | 0           | 1.501355014 | spermatid      | POLR3C    |
| DDR2      | 3.75E-79    | 0.527725512 | 0.323 | 0.085 | 2.30E-74    | 3.80E+00    | VSM_cells      | DDR2      |
| THBS3     | 0           | 0.527662739 | 0.546 | 0.283 | 0           | 1.929328622 | spermatid      | THBS3     |
| MYH9      | 1.44E-62    | 0.52756478  | 0.427 | 0.159 | 8.85E-58    | 2.69E+00    | VSM_cells      | MYH9      |
| DAB1-AS1  | 4.00E-216   | 0.52745805  | 0.362 | 0.205 | 2.45E-211   | 1.77E+00    | spermatid      | DAB1-AS1  |
| SH3BGRL2  | 2.71E-228   | 0.527359126 | 0.415 | 0.099 | 1.66E-223   | 4.19E+00    | Leydig_cells   | SH3BGRL   |
| PLA2G6    | 0           | 0.527232829 | 0.682 | 0.151 | 0           | 4.516556291 | spermatocyte   | PLA2G6    |
| ATXN2L    | 0           | 0.527097814 | 0.853 | 0.418 | 0           | 2.040669856 | spermatocyte   | ATXN2L    |
| EI24      | 0           | 0.527092021 | 0.485 | 0.28  | 0           | 1.732142857 | spermatogonia  | EI24      |
| MOK       | 0           | 0.527002837 | 0.91  | 0.407 | 0           | 2.235872236 | spermatocyte   | MOK       |
| CCDC3     | 0           | 0.526972355 | 0.329 | 0.035 | 0           | 9.4         | PTM_cells      | CCDC3     |
| EMC7      | 0           | 0.526960558 | 0.84  | 0.368 | 0           | 2.282608696 | spermatocyte   | EMC7      |
| CHCHD6    | 0           | 0.526860052 | 0.767 | 0.284 | 0           | 2.700704225 | spermatocyte   | CHCHD6    |
| C1orf87   | 0           | 0.526787566 | 0.537 | 0.131 | 0           | 4.099236641 | spermatocyte   | C1orf87   |
| UBBP4     | 0.000160187 | 0.526675782 | 0.3   | 0.131 | 1           | 2.290076336 | mastocyte      | UBBP4     |
| CAV21     | 1.52E-120   | 0.526592385 | 0.336 | 0.115 | 9.34E-116   | 2.92E+00    | Leydig_cells   | CAV2      |
| RPN1      | 0           | 0.526346947 | 0.537 | 0.251 | 0           | 2.139442231 | spermatogonia  | RPN1      |
| CIB4      | 0           | 0.526138837 | 0.541 | 0.172 | 0           | 3.145348837 | spermatocyte   | CIB4      |
| PDE5A1    | 1.06E-67    | 0.525986243 | 0.362 | 0.118 | 6.48E-63    | 3.07E+00    | VSM_cells      | PDE5A     |
| PRC1.AS1  | 1.42E-301   | 0.525971974 | 0.274 | 0.105 | 8.70E-297   | 2.61E+00    | spermatid      | PRC1.AS1  |
| MAFB2     | 0           | 0.525955533 | 0.367 | 0.05  | 0           | 7.34        | PTM_cells      | MAFB      |
| CCER1     | 0           | 0.52592958  | 0.735 | 0.298 | 0           | 2.466442953 | spermatocyte   | CCER1     |
| RPS216    | 2.95E-154   | 0.525777034 | 0.786 | 0.512 | 1.81E-149   | 1.54E+00    | PTM_cells      | RPS21     |
| ITGB7     | 6.93E-39    | 0.52569687  | 0.105 | 0.002 | 4.25E-34    | 5.25E+01    | T_cells        | ITGB7     |
| PPIA6     | 1.34E-48    | 0.525367355 | 0.619 | 0.628 | 8.24E-44    | 9.86E-01    | Sertoli_cells  | PPIA      |
| RPS101    | 6.12E-91    | 0.525353973 | 0.695 | 0.533 | 3.75E-86    | 1.30E+00    | PTM_cells      | RPS10     |
| KIAA1462  | 9.87E-217   | 0.525216421 | 0.196 | 0.035 | 6.05E-212   | 5.60E+00    | Sertoli_cells  | KIAA1462  |
| SCAPER    | 0           | 0.525147075 | 0.565 | 0.362 | 0           | 1.560773481 | spermatogonia  | SCAPER    |
| EFCAB10   | 0           | 0.525139626 | 0.812 | 0.274 | 0           | 2.96350365  | spermatocyte   | EFCAB10   |
| GPIHBP1   | 0           | 0.525065592 | 0.243 | 0.001 | 0           | 243         | endotheliocyte | GPIHBP1   |
| GPR155    | 4.13E-51    | 0.525047992 | 0.182 | 0.031 | 2.53E-46    | 5.87E+00    | macrophages    | GPR155    |
| DDX19B    | 0           | 0.524963243 | 0.875 | 0.324 | 0           | 2.700617284 | spermatocyte   | DDX19B    |
| C3orf38   | 0           | 0.524959889 | 0.832 | 0.334 | 0           | 2.491017964 | spermatocyte   | C3orf38   |
| FAM3C     | 9.67E-93    | 0.524922157 | 0.335 | 0.14  | 5.93E-88    | 2.39E+00    | Leydig_cells   | FAM3C     |
| SRSF52    | 0.006351079 | 0.524888714 | 0.605 | 0.602 | 1           | 1.004983389 | T_cells        | SRSF5     |
| NDUFB11   | 0           | 0.524830592 | 0.483 | 0.109 | 0           | 4.431192661 | PTM_cells      | NDUFB11   |
| LRP10     | 4.00E-74    | 0.524753469 | 0.365 | 0.099 | 2.45E-69    | 3.69E+00    | endotheliocyte | LRP10     |
| LINC00668 | 0           | 0.524643822 | 0.309 | 0.098 | 0           | 3.153061224 | spermatogonia  | LINC00668 |
| S100A11   | 3.44E-49    | 0.524606648 | 0.65  | 0.349 | 2.11E-44    | 1.86E+00    | endotheliocyte | S100A11   |
| ASB9      | 1.77E-162   | 0.524547848 | 0.193 | 0.042 | 1.09E-157   | 4.60E+00    | Sertoli_cells  | ASB9      |
| TMEM8A    | 5.55E-58    | 0.524487703 | 0.265 | 0.143 | 3.40E-53    | 1.85E+00    | Sertoli_cells  | TMEM8A    |
| LINC01095 | 0           | 0.524458223 | 0.458 | 0.184 | 0           | 2.489130435 | spermatid      | LINC01095 |
| NOL4L     | 0           | 0.524287782 | 0.829 | 0.264 | 0           | 3.140151515 | spermatocyte   | NOL4L     |
| TGS1      | 0           | 0.524273679 | 0.396 | 0.073 | 0           | 5.424657534 | spermatogonia  | TGS1      |
| C5orf46   | 0           | 0.52426913  | 0.423 | 0.154 | 0           | 2.746753247 | spermatid      | C5orf46   |
| FRMD6     | 0           | 0.524202527 | 0.546 | 0.293 | 0           | 1.863481229 | spermatid      | FRMD6     |
| TEKT2     | 0           | 0.524190626 | 0.581 | 0.345 | 0           | 1.684057971 | spermatid      | TEKT2     |
| GULP1     | 0           | 0.524173254 | 0.47  | 0.132 | 0           | 3.560606061 | spermatocyte   | GULP1     |
| ANGPTL2   | 1.54E-262   | 0.524165875 | 0.187 | 0.019 | 9.47E-258   | 9.84E+00    | Leydig_cells   | ANGPTL2   |
| SYNGR2    | 8.43E-17    | 0.524015653 | 0.229 | 0.099 | 5.17E-12    | 2.31E+00    | macrophages    | SYNGR2    |
| DNAJC2    | 0           | 0.523998242 | 0.945 | 0.47  | 0           | 2.010638298 | spermatocyte   | DNAJC2    |
| MTRNR2L12 | 9.85E-88    | 0.523987285 | 0.235 | 0.093 | 6.04E-83    | 2.53E+00    | Sertoli_cells  | MTRNR2L12 |
| PKNOX1    | 0           | 0.523973191 | 0.819 | 0.292 | 0           | 2.804794521 | spermatocyte   | PKNOX1    |
| PRKACG    | 0           | 0.523945588 | 0.735 | 0.162 | 0           | 4.537037037 | spermatocyte   | PRKACG    |
| RASL11A   | 0           | 0.523905815 | 0.279 | 0.01  | 0           | 27.9        | VSM_cells      | RASL11A   |

|                 |             |             |       |       |             |             |                |                 |
|-----------------|-------------|-------------|-------|-------|-------------|-------------|----------------|-----------------|
| ATF43           | 4.64E-116   | 0.523864961 | 0.595 | 0.347 | 2.85E-111   | 1.71E+00    | PTM_cells      | ATF4            |
| XXyac-YX155B6.5 | 1.74E-247   | 0.523803269 | 0.319 | 0.16  | 1.07E-242   | 1.99E+00    | spermatid      | XXyac-YX155B6.5 |
| RPL43           | 6.57E-49    | 0.523773798 | 0.831 | 0.75  | 4.03E-44    | 1.11E+00    | VSM_cells      | RPL4            |
| PCNT            | 0           | 0.523755962 | 0.474 | 0.183 | 0           | 2.590163934 | spermatogonia  | PCNT            |
| TNFRSF1A        | 4.25E-226   | 0.523727969 | 0.347 | 0.034 | 2.61E-221   | 1.02E+01    | endotheliocyte | TNFRSF1A        |
| VGLL4           | 1.23E-57    | 0.523572201 | 0.26  | 0.139 | 7.55E-53    | 1.87E+00    | Sertoli_cells  | VGLL4           |
| COMT            | 2.31E-174   | 0.523534973 | 0.352 | 0.094 | 1.42E-169   | 3.74E+00    | Leydig_cells   | COMT            |
| NTF3            | 0           | 0.523484414 | 0.268 | 0.009 | 0           | 29.77777778 | VSM_cells      | NTF3            |
| ERP291          | 1.44E-70    | 0.52342162  | 0.356 | 0.197 | 8.86E-66    | 1.81E+00    | Sertoli_cells  | ERP29           |
| SESN1           | 4.69E-18    | 0.523329956 | 0.295 | 0.248 | 2.88E-13    | 1.19E+00    | Sertoli_cells  | SESN1           |
| RPL131          | 2.02E-129   | 0.523283553 | 0.985 | 0.955 | 1.24E-124   | 1.03E+00    | Leydig_cells   | RPL13           |
| NCKAP1L         | 1.59E-178   | 0.523198106 | 0.202 | 0.011 | 9.75E-174   | 1.84E+01    | macrophages    | NCKAP1L         |
| NOL7            | 0           | 0.523185703 | 0.895 | 0.44  | 0           | 2.034090909 | spermatocyte   | NOL7            |
| LITAF1          | 0           | 0.52317669  | 0.384 | 0.077 | 0           | 4.987012987 | PTM_cells      | LITAF           |
| RAD51D          | 0           | 0.523135333 | 0.407 | 0.1   | 0           | 4.07        | spermatid      | RAD51D          |
| S100A112        | 4.04E-71    | 0.523128928 | 0.547 | 0.345 | 2.48E-66    | 1.59E+00    | Leydig_cells   | S100A11         |
| EWSR1           | 0           | 0.523123185 | 0.942 | 0.408 | 0           | 2.308823529 | spermatocyte   | EWSR1           |
| MAP3K11         | 4.95E-124   | 0.523062298 | 0.39  | 0.077 | 3.04E-119   | 5.06E+00    | endotheliocyte | MAP3K11         |
| SLC35E4         | 0           | 0.523039277 | 0.773 | 0.224 | 0           | 3.450892857 | spermatocyte   | SLC35E4         |
| SMDT1           | 0           | 0.523009221 | 0.79  | 0.371 | 0           | 2.129380054 | spermatocyte   | SMDT1           |
| JDP2            | 2.71E-24    | 0.523001145 | 0.138 | 0.033 | 1.66E-19    | 4.18E+00    | macrophages    | JDP2            |
| PRDX3           | 8.17E-28    | 0.522943047 | 0.218 | 0.14  | 5.01E-23    | 1.56E+00    | Sertoli_cells  | PRDX3           |
| BUD31           | 0           | 0.522787453 | 0.92  | 0.485 | 0           | 1.896907216 | spermatocyte   | BUD31           |
| IRF2BP2         | 1.06E-26    | 0.522706958 | 0.526 | 0.345 | 6.50E-22    | 1.52E+00    | endotheliocyte | IRF2BP2         |
| CPQ             | 5.11E-224   | 0.522706034 | 0.285 | 0.054 | 3.13E-219   | 5.28E+00    | Leydig_cells   | CPQ             |
| SIT1            | 1.58E-265   | 0.522637158 | 0.105 | 0     | 9.66E-261   | #DIV/0!     | T_cells        | SIT1            |
| SLTM            | 2.77E-260   | 0.522597194 | 0.588 | 0.447 | 1.70E-255   | 1.32E+00    | spermatogonia  | SLTM            |
| ARHGAP101       | 8.46E-200   | 0.522414839 | 0.41  | 0.13  | 5.19E-195   | 3.15E+00    | PTM_cells      | ARHGAP10        |
| C6orf62         | 0           | 0.52235655  | 0.63  | 0.433 | 0           | 1.454965358 | spermatogonia  | C6orf62         |
| TMEM202         | 0           | 0.522340532 | 0.71  | 0.166 | 0           | 4.277108434 | spermatocyte   | TMEM202         |
| UCHL1           | 0           | 0.522324265 | 0.278 | 0.056 | 0           | 4.964285714 | spermatogonia  | UCHL1           |
| RPS3AP471       | 0.000328975 | 0.522287957 | 0.275 | 0.276 | 1           | 0.996376812 | Leydig_cells   | RPS3AP47        |
| PRKAA1          | 0           | 0.522252783 | 0.887 | 0.371 | 0           | 2.39083558  | spermatocyte   | PRKAA1          |
| TM4SF12         | 6.94E-139   | 0.522251239 | 0.41  | 0.081 | 4.26E-134   | 5.06E+00    | VSM_cells      | TM4SF1          |
| RP11-168L7.3    | 0           | 0.522240912 | 0.313 | 0.099 | 0           | 3.161616162 | spermatid      | RP11-168L7.3    |
| CNTN1           | 3.32E-154   | 0.52216826  | 0.283 | 0.073 | 2.04E-149   | 3.88E+00    | Leydig_cells   | CNTN1           |
| CPPED1          | 3.52E-181   | 0.52214898  | 0.193 | 0.04  | 2.16E-176   | 4.83E+00    | Sertoli_cells  | CPPED1          |
| DECR1           | 0           | 0.522141466 | 0.862 | 0.351 | 0           | 2.455840456 | spermatocyte   | DECR1           |
| REEP61          | 1.43E-22    | 0.522089449 | 0.503 | 0.499 | 8.75E-18    | 1.01E+00    | Sertoli_cells  | REEP6           |
| IFI44           | 2.76E-105   | 0.522070405 | 0.178 | 0.015 | 1.69E-100   | 1.19E+01    | macrophages    | IFI44           |
| LIMA11          | 1.93E-66    | 0.522002078 | 0.392 | 0.22  | 1.19E-61    | 1.78E+00    | Leydig_cells   | LIMA1           |
| AC105339.1      | 0           | 0.521876655 | 0.345 | 0.045 | 0           | 7.666666667 | spermatid      | AC105339.1      |
| EFCAB11         | 0           | 0.521785895 | 0.597 | 0.426 | 0           | 1.401408451 | spermatid      | EFCAB11         |
| HYPM            | 0           | 0.52177643  | 0.438 | 0.164 | 0           | 2.670731707 | spermatid      | HYPM            |
| RP4-586O15.1    | 2.14E-159   | 0.521768508 | 0.367 | 0.239 | 1.31E-154   | 1.54E+00    | spermatid      | RP4-586O15.1    |
| NDUFB8          | 1.11E-121   | 0.521716292 | 0.58  | 0.327 | 6.80E-117   | 1.77E+00    | PTM_cells      | NDUFB8          |
| TPRG1           | 0           | 0.521689055 | 0.474 | 0.127 | 0           | 3.732283465 | spermatocyte   | TPRG1           |
| UBA52           | 0           | 0.521651043 | 0.934 | 0.923 | 0           | 1.01191766  | spermatid      | UBA52           |
| RERG            | 7.88E-71    | 0.521613999 | 0.332 | 0.102 | 4.84E-66    | 3.25E+00    | VSM_cells      | RERG            |
| EDNRA           | 3.31E-201   | 0.521600912 | 0.243 | 0.043 | 2.03E-196   | 5.65E+00    | Leydig_cells   | EDNRA           |
| PHB2            | 1.77E-65    | 0.521545312 | 0.421 | 0.153 | 1.08E-60    | 2.75E+00    | VSM_cells      | PHB2            |
| DRC7            | 0           | 0.52151717  | 0.796 | 0.231 | 0           | 3.445887446 | spermatocyte   | DRC7            |
| ATXN10          | 0           | 0.521120037 | 0.622 | 0.401 | 0           | 1.551122195 | spermatogonia  | ATXN10          |
| TGOLN2          | 0.00010176  | 0.520992038 | 0.303 | 0.248 | 1           | 1.221774194 | macrophages    | TGOLN2          |
| HP1BP3          | 0           | 0.520926076 | 0.591 | 0.335 | 0           | 1.764179104 | spermatogonia  | HP1BP3          |
| IKZF1           | 2.99E-48    | 0.520916942 | 0.162 | 0.026 | 1.83E-43    | 6.23E+00    | macrophages    | IKZF1           |
| SEC61G          | 0           | 0.520852037 | 0.655 | 0.448 | 0           | 1.462053571 | spermatogonia  | SEC61G          |
| SOCS7           | 0           | 0.520840878 | 0.644 | 0.51  | 0           | 1.262745098 | spermatid      | SOCS7           |
| NR2F2           | 4.07E-73    | 0.520538846 | 0.506 | 0.165 | 2.50E-68    | 3.07E+00    | endotheliocyte | NR2F2           |
| RP11.51O6.1     | 1.31E-07    | 0.520436573 | 0.199 | 0.116 | 0.008041166 | 1.715517241 | macrophages    | RP11.51O6.1     |
| RPS29           | 1.39E-54    | 0.520414225 | 0.943 | 0.885 | 8.55E-50    | 1.07E+00    | endotheliocyte | RPS29           |
| GUK11           | 2.23E-95    | 0.520383384 | 0.654 | 0.501 | 1.37E-90    | 1.31E+00    | PTM_cells      | GUK1            |
| TBC1D1          | 3.49E-29    | 0.52033791  | 0.493 | 0.329 | 2.14E-24    | 1.50E+00    | VSM_cells      | TBC1D1          |
| ARHGEF3         | 3.22E-58    | 0.520297854 | 0.387 | 0.133 | 1.98E-53    | 2.91E+00    | endotheliocyte | ARHGEF3         |
| ATP5G2          | 1.88E-41    | 0.52024543  | 0.705 | 0.492 | 1.15E-36    | 1.43E+00    | endotheliocyte | ATP5G2          |
| RGS161          | 1.79E-105   | 0.520153582 | 0.205 | 0.052 | 1.10E-100   | 3.94E+00    | Leydig_cells   | RGS16           |
| FAM175A         | 0           | 0.519966556 | 0.485 | 0.261 | 0           | 1.858237548 | spermatogonia  | FAM175A         |
| UQCRH           | 0           | 0.519927395 | 0.607 | 0.391 | 0           | 1.552429668 | spermatogonia  | UQCRH           |
| RPL44           | 0.000519066 | 0.519924222 | 0.816 | 0.751 | 1           | 1.086551265 | T_cells        | RPL4            |
| SNRNP200        | 0           | 0.519854267 | 0.545 | 0.268 | 0           | 2.03358209  | spermatogonia  | SNRNP200        |
| MIR22HG         | 2.23E-92    | 0.519828074 | 0.272 | 0.096 | 1.37E-87    | 2.83E+00    | Leydig_cells   | MIR22HG         |
| MFSD6L          | 0           | 0.51981143  | 0.771 | 0.194 | 0           | 3.974226804 | spermatocyte   | MFSD6L          |
| TGFB1           | 1.32E-44    | 0.519765459 | 0.199 | 0.04  | 8.12E-40    | 4.98E+00    | macrophages    | TGFB1           |
| SCG5            | 0           | 0.519712906 | 0.655 | 0.139 | 0           | 4.712230216 | spermatocyte   | SCG5            |
| ARHGAP10        | 5.74E-90    | 0.519705831 | 0.327 | 0.135 | 3.52E-85    | 2.42E+00    | Leydig_cells   | ARHGAP10        |

|               |             |             |       |       |             |             |                |               |
|---------------|-------------|-------------|-------|-------|-------------|-------------|----------------|---------------|
| EIF4A22       | 7.22E-83    | 0.519542936 | 0.676 | 0.458 | 4.43E-78    | 1.48E+00    | Leydig_cells   | EIF4A2        |
| CCDC57        | 0           | 0.519271059 | 0.44  | 0.213 | 0           | 2.0657277   | spermatid      | CCDC57        |
| ATP1B31       | 1.58E-06    | 0.519056343 | 0.579 | 0.571 | 0.096890431 | 1.014010508 | macrophages    | ATP1B3        |
| AP2B1         | 0           | 0.518863384 | 0.97  | 0.556 | 0           | 1.744604317 | spermatocyte   | AP2B1         |
| NBEAL1        | 3.91E-46    | 0.518845985 | 0.408 | 0.193 | 2.40E-41    | 2.11E+00    | VSM_cells      | NBEAL1        |
| SWT1          | 0           | 0.518754238 | 0.852 | 0.266 | 0           | 3.203007519 | spermatocyte   | SWT1          |
| C3            | 5.29E-06    | 0.518751239 | 0.229 | 0.154 | 0.32452869  | 1.487012987 | macrophages    | C3            |
| SRRM1         | 0           | 0.518724348 | 0.735 | 0.555 | 0           | 1.324324324 | spermatogonia  | SRRM1         |
| ATP1B1        | 3.06E-14    | 0.518704002 | 0.29  | 0.15  | 1.88E-09    | 1.93E+00    | macrophages    | ATP1B1        |
| STUB1         | 1.49E-17    | 0.518625615 | 0.273 | 0.219 | 9.13E-13    | 1.25E+00    | Sertoli_cells  | STUB1         |
| C4orf32       | 5.74E-22    | 0.518563346 | 0.432 | 0.287 | 3.52E-17    | 1.51E+00    | endotheliocyte | C4orf32       |
| CDIPT.AS1     | 2.78E-287   | 0.518549586 | 0.301 | 0.126 | 1.70E-282   | 2.39E+00    | spermatid      | CDIPT.AS1     |
| LIMS21        | 2.08E-264   | 0.518464126 | 0.311 | 0.027 | 1.28E-259   | 1.15E+01    | VSM_cells      | LIMS2         |
| PSME2         | 1.24E-67    | 0.518342276 | 0.469 | 0.169 | 7.60E-63    | 2.78E+00    | endotheliocyte | PSME2         |
| GYPC1         | 3.40E-260   | 0.518056093 | 0.342 | 0.034 | 2.08E-255   | 1.01E+01    | VSM_cells      | GYPC          |
| SERINC11      | 6.33E-17    | 0.518023358 | 0.3   | 0.147 | 3.88E-12    | 2.04E+00    | macrophages    | SERINC1       |
| RP4.584D14.6  | 0           | 0.518003532 | 0.212 | 0.041 | 0           | 5.170731707 | spermatid      | RP4.584D14.6  |
| TCEAL31       | 1.71E-120   | 0.517940653 | 0.389 | 0.082 | 1.05E-115   | 4.74E+00    | VSM_cells      | TCEAL3        |
| TRIML1        | 0           | 0.517895862 | 0.406 | 0.123 | 0           | 3.300813008 | spermatid      | TRIML1        |
| DYNC1L11      | 0           | 0.517782125 | 0.661 | 0.443 | 0           | 1.492099323 | spermatogonia  | DYNC1L11      |
| AR1           | 0           | 0.517640875 | 0.375 | 0.05  | 0           | 7.5         | PTM_cells      | AR            |
| LYZL6         | 0           | 0.51760714  | 0.644 | 0.301 | 0           | 2.139534884 | spermatocyte   | LYZL6         |
| PXN           | 7.82E-114   | 0.517510206 | 0.298 | 0.048 | 4.80E-109   | 6.21E+00    | endotheliocyte | PXN           |
| AKR1C21       | 0           | 0.51749431  | 0.364 | 0.058 | 0           | 6.275862069 | PTM_cells      | AKR1C2        |
| MAT2A         | 2.61E-06    | 0.517489273 | 0.367 | 0.305 | 0.160263958 | 1.203278689 | macrophages    | MAT2A         |
| ORC2          | 0           | 0.517445669 | 0.764 | 0.198 | 0           | 3.858585859 | spermatocyte   | ORC2          |
| STAU1         | 0           | 0.51742236  | 0.541 | 0.25  | 0           | 2.164       | spermatogonia  | STAU1         |
| RPL361        | 2.67E-92    | 0.517383298 | 0.783 | 0.699 | 1.64E-87    | 1.12E+00    | Leydig_cells   | RPL36         |
| TPP2          | 0           | 0.517340236 | 0.962 | 0.551 | 0           | 1.745916515 | spermatocyte   | TPP2          |
| PTTG1IP       | 3.96E-24    | 0.517188053 | 0.593 | 0.44  | 2.43E-19    | 1.35E+00    | endotheliocyte | PTTG1IP       |
| ZMYND19       | 0           | 0.517173496 | 0.438 | 0.125 | 0           | 3.504       | spermatogonia  | ZMYND19       |
| RP11.630C16.1 | 0           | 0.517167712 | 0.226 | 0.046 | 0           | 4.913043478 | spermatid      | RP11.630C16.1 |
| PSME13        | 0           | 0.517146063 | 0.433 | 0.081 | 0           | 5.345679012 | PTM_cells      | PSME1         |
| EMC3          | 0           | 0.517143674 | 0.91  | 0.46  | 0           | 1.97826087  | spermatocyte   | EMC3          |
| RBM34         | 1.30E-211   | 0.517077791 | 0.59  | 0.21  | 7.99E-207   | 2.81E+00    | PTM_cells      | RBM3          |
| POLR2J3       | 0           | 0.517066933 | 0.419 | 0.096 | 0           | 4.364583333 | spermatogonia  | POLR2J3       |
| NUDT10        | 2.82E-261   | 0.516751328 | 0.192 | 0.028 | 1.73E-256   | 6.86E+00    | Sertoli_cells  | NUDT10        |
| RBM8A         | 0           | 0.516634707 | 0.69  | 0.492 | 0           | 1.402439024 | spermatogonia  | RBM8A         |
| FAM49A        | 5.13E-123   | 0.516620749 | 0.152 | 0.009 | 3.15E-118   | 1.69E+01    | macrophages    | FAM49A        |
| SMARCC1       | 0           | 0.516609038 | 0.579 | 0.314 | 0           | 1.843949045 | spermatogonia  | SMARCC1       |
| NT5C1B        | 0           | 0.516573598 | 0.533 | 0.258 | 0           | 2.065891473 | spermatid      | NT5C1B        |
| INCA1         | 9.15E-127   | 0.516548072 | 0.408 | 0.29  | 5.61E-122   | 1.41E+00    | spermatogonia  | INCA1         |
| MARCKS        | 5.35E-28    | 0.51653287  | 0.442 | 0.256 | 3.28E-23    | 1.73E+00    | endotheliocyte | MARCKS        |
| TMEM134       | 0           | 0.516512791 | 0.509 | 0.281 | 0           | 1.8113879   | spermatogonia  | TMEM134       |
| PPID          | 0           | 0.51643159  | 0.503 | 0.268 | 0           | 1.876865672 | spermatogonia  | PPID          |
| BTG13         | 7.24E-84    | 0.516401369 | 0.717 | 0.605 | 4.44E-79    | 1.19E+00    | PTM_cells      | BTG1          |
| AC007969.5    | 5.91E-06    | 0.516377966 | 0.293 | 0.221 | 0.362300018 | 1.325791855 | macrophages    | AC007969.5    |
| GSN1          | 5.34E-25    | 0.516226538 | 0.438 | 0.214 | 3.28E-20    | 2.05E+00    | macrophages    | GSN           |
| SLC1A6        | 7.78E-93    | 0.516164021 | 0.211 | 0.078 | 4.78E-88    | 2.71E+00    | Sertoli_cells  | SLC1A6        |
| RPS185        | 2.76E-138   | 0.516067996 | 0.89  | 0.851 | 1.70E-133   | 1.05E+00    | Sertoli_cells  | RPS18         |
| NOMO1         | 0           | 0.516060344 | 0.33  | 0.087 | 0           | 3.793103448 | spermatogonia  | NOMO1         |
| RPL133        | 3.79E-68    | 0.516017658 | 0.962 | 0.956 | 2.32E-63    | 1.01E+00    | VSM_cells      | RPL13         |
| PPP1R15A5     | 0.007922494 | 0.515990471 | 0.34  | 0.198 | 1           | 1.717171717 | mastocyte      | PPP1R15A      |
| VPS13C        | 1.02E-15    | 0.51593764  | 0.259 | 0.122 | 6.27E-11    | 2.12E+00    | macrophages    | VPS13C        |
| LETM2         | 0           | 0.515914717 | 0.738 | 0.164 | 0           | 4.5         | spermatocyte   | LETM2         |
| PHACTR2       | 8.90E-117   | 0.515804114 | 0.397 | 0.079 | 5.46E-112   | 5.03E+00    | endotheliocyte | PHACTR2       |
| ERH           | 0           | 0.515783087 | 0.696 | 0.532 | 0           | 1.308270677 | spermatogonia  | ERH           |
| TMEM109       | 8.96E-113   | 0.515773136 | 0.306 | 0.103 | 5.49E-108   | 2.97E+00    | Leydig_cells   | TMEM109       |
| SHROOM4       | 0           | 0.51569314  | 0.283 | 0.004 | 0           | 70.75       | endotheliocyte | SHROOM4       |
| MCL13         | 8.40E-65    | 0.515463271 | 0.635 | 0.525 | 5.15E-60    | 1.21E+00    | PTM_cells      | MCL1          |
| PPP2CA        | 0           | 0.51538996  | 0.542 | 0.283 | 0           | 1.915194346 | spermatogonia  | PPP2CA        |
| CPQ1          | 0           | 0.515378079 | 0.368 | 0.048 | 0           | 7.666666667 | PTM_cells      | CPQ           |
| FXYD11        | 0           | 0.515354905 | 0.306 | 0.041 | 0           | 7.463414634 | PTM_cells      | FXYD1         |
| BMP2K         | 2.46E-05    | 0.515330805 | 0.303 | 0.243 | 1           | 1.24691358  | macrophages    | BMP2K         |
| KNSTRN        | 0           | 0.515252306 | 0.605 | 0.424 | 0           | 1.426886792 | spermatid      | KNSTRN        |
| SLC51A        | 2.18E-133   | 0.515247198 | 0.289 | 0.084 | 1.34E-128   | 3.44E+00    | Leydig_cells   | SLC51A        |
| MAGED22       | 2.90E-127   | 0.515225585 | 0.531 | 0.134 | 1.78E-122   | 3.96E+00    | VSM_cells      | MAGED2        |
| UBE2F         | 0           | 0.515110081 | 0.426 | 0.147 | 0           | 2.897959184 | spermatogonia  | UBE2F         |
| C20orf195     | 6.01E-137   | 0.515071505 | 0.399 | 0.276 | 3.69E-132   | 1.45E+00    | spermatid      | C20orf195     |
| CFAP43        | 0           | 0.515063087 | 0.835 | 0.294 | 0           | 2.840136054 | spermatocyte   | CFAP43        |
| SEC11A        | 0           | 0.515047499 | 0.593 | 0.376 | 0           | 1.57712766  | spermatogonia  | SEC11A        |
| RNU6.1064P    | 8.04E-32    | 0.514878384 | 0.15  | 0.066 | 4.93E-27    | 2.27E+00    | Leydig_cells   | RNU6.1064P    |
| DKFZP434K028  | 0           | 0.51476446  | 0.396 | 0.058 | 0           | 6.827586207 | spermatid      | DKFZP434K028  |
| SH2D2A        | 1.13E-48    | 0.514637605 | 0.158 | 0.004 | 6.94E-44    | 3.95E+01    | T_cells        | SH2D2A        |
| ITGB6         | 0           | 0.514366731 | 0.692 | 0.22  | 0           | 3.145454545 | spermatocyte   | ITGB6         |

|               |             |             |       |       |             |             |                |               |
|---------------|-------------|-------------|-------|-------|-------------|-------------|----------------|---------------|
| TCF7L1        | 1.59E-80    | 0.514264601 | 0.305 | 0.126 | 9.73E-76    | 2.42E+00    | Leydig_cells   | TCF7L1        |
| AFAP1         | 0           | 0.514257126 | 0.483 | 0.243 | 0           | 1.987654321 | spermatid      | AFAP1         |
| BNIP2         | 6.30E-45    | 0.514222178 | 0.452 | 0.21  | 3.87E-40    | 2.15E+00    | endotheliocyte | BNIP2         |
| RP11-619L12.4 | 0           | 0.514222127 | 0.303 | 0.067 | 0           | 4.52238806  | spermatid      | RP11-619L12.4 |
| ANXA7         | 2.16E-103   | 0.514150406 | 0.369 | 0.152 | 1.32E-98    | 2.43E+00    | Leydig_cells   | ANXA7         |
| LYPLA1        | 0           | 0.514040781 | 0.656 | 0.517 | 0           | 1.268858801 | spermatid      | LYPLA1        |
| COIL          | 0           | 0.51403849  | 0.915 | 0.511 | 0           | 1.790606654 | spermatocyte   | COIL          |
| DCAF15        | 0           | 0.513945026 | 0.582 | 0.179 | 0           | 3.251396648 | spermatocyte   | DCAF15        |
| FAU1          | 7.64E-23    | 0.513942349 | 0.842 | 0.838 | 4.68E-18    | 1.00E+00    | macrophages    | FAU           |
| KCTD13        | 3.51E-11    | 0.513933194 | 0.289 | 0.269 | 2.15E-06    | 1.07E+00    | Sertoli_cells  | KCTD13        |
| DCDC2         | 0           | 0.513766396 | 0.665 | 0.101 | 0           | 6.584158416 | spermatocyte   | DCDC2         |
| MSI2          | 1.64E-85    | 0.513725393 | 0.236 | 0.098 | 1.00E-80    | 2.41E+00    | Sertoli_cells  | MSI2          |
| AKR1C31       | 5.95E-246   | 0.513631983 | 0.259 | 0.04  | 3.65E-241   | 6.48E+00    | Leydig_cells   | AKR1C3        |
| MYL12A3       | 1.03E-19    | 0.513575355 | 0.373 | 0.326 | 6.33E-15    | 1.14E+00    | Sertoli_cells  | MYL12A        |
| NFE2L2        | 0.000376262 | 0.513561082 | 0.424 | 0.42  | 1           | 1.00952381  | macrophages    | NFE2L2        |
| ADAM18        | 0           | 0.513531454 | 0.702 | 0.156 | 0           | 4.5         | spermatocyte   | ADAM18        |
| GALK1         | 6.94E-115   | 0.51352071  | 0.172 | 0.046 | 4.26E-110   | 3.74E+00    | Sertoli_cells  | GALK1         |
| SUMO3         | 1.96E-285   | 0.513327672 | 0.517 | 0.328 | 1.20E-280   | 1.58E+00    | spermatogonia  | SUMO3         |
| ZNF165        | 0           | 0.513309126 | 0.782 | 0.219 | 0           | 3.570776256 | spermatocyte   | ZNF165        |
| RPL51         | 3.82E-135   | 0.513201975 | 0.927 | 0.852 | 2.34E-130   | 1.09E+00    | Leydig_cells   | RPL5          |
| MORN2         | 0           | 0.513165478 | 0.828 | 0.717 | 0           | 1.154811715 | spermatid      | MORN2         |
| PDCD6         | 0           | 0.513102202 | 0.531 | 0.291 | 0           | 1.824742268 | spermatogonia  | PDCD6         |
| EIF2AK21      | 0           | 0.513018599 | 0.362 | 0.057 | 0           | 6.350877193 | PTM_cells      | EIF2AK2       |
| CD164         | 3.43E-183   | 0.51299674  | 0.603 | 0.461 | 2.11E-178   | 1.31E+00    | spermatogonia  | CD164         |
| COBLL1        | 5.77E-249   | 0.512681916 | 0.275 | 0.02  | 3.54E-244   | 1.38E+01    | endotheliocyte | COBLL1        |
| AKR1B1        | 0           | 0.512581671 | 0.337 | 0.078 | 0           | 4.320512821 | spermatogonia  | AKR1B1        |
| RPSA2         | 2.08E-68    | 0.512555245 | 0.827 | 0.618 | 1.27E-63    | 1.34E+00    | VSM_cells      | RPSA          |
| LAP3          | 0           | 0.512549322 | 0.775 | 0.228 | 0           | 3.399122807 | spermatocyte   | LAP3          |
| APMAP         | 0           | 0.512438572 | 0.487 | 0.187 | 0           | 2.604278075 | spermatogonia  | APMAP         |
| SOCS33        | 1.66E-208   | 0.512387425 | 0.409 | 0.112 | 1.02E-203   | 3.65E+00    | PTM_cells      | SOCS3         |
| MCM7          | 0           | 0.512374625 | 0.55  | 0.346 | 0           | 1.589595376 | spermatogonia  | MCM7          |
| CXADR         | 3.32E-190   | 0.512313446 | 0.213 | 0.047 | 2.04E-185   | 4.53E+00    | Sertoli_cells  | CXADR         |
| S100A113      | 4.88E-117   | 0.512298538 | 0.611 | 0.341 | 2.99E-112   | 1.79E+00    | PTM_cells      | S100A11       |
| DZIP1         | 0           | 0.512236164 | 0.964 | 0.492 | 0           | 1.959349593 | spermatocyte   | DZIP1         |
| RNF34         | 0           | 0.512215273 | 0.477 | 0.254 | 0           | 1.877952756 | spermatogonia  | RNF34         |
| FBXO17        | 0           | 0.512043641 | 0.359 | 0.041 | 0           | 8.756097561 | PTM_cells      | FBXO17        |
| MYOZ3         | 0           | 0.511915333 | 0.269 | 0.007 | 0           | 38.42857143 | PTM_cells      | MYOZ3         |
| IFT43         | 0           | 0.511851189 | 0.826 | 0.28  | 0           | 2.95        | spermatocyte   | IFT43         |
| EDRF1         | 0.008968155 | 0.511812581 | 0.4   | 0.292 | 1           | 1.369863014 | mastocyte      | EDRF1         |
| C11orf85      | 0           | 0.511642388 | 0.267 | 0.047 | 0           | 5.680851064 | spermatogonia  | C11orf85      |
| B9D1          | 0           | 0.51160664  | 0.803 | 0.288 | 0           | 2.788194444 | spermatocyte   | B9D1          |
| PPIF          | 1.22E-07    | 0.511602458 | 0.212 | 0.125 | 0.007476248 | 1.696       | macrophages    | PPIF          |
| OSTC          | 7.85E-78    | 0.511569458 | 0.414 | 0.219 | 4.81E-73    | 1.89E+00    | Leydig_cells   | OSTC          |
| ASNS          | 0           | 0.511557838 | 0.486 | 0.22  | 0           | 2.209090909 | spermatid      | ASNS          |
| BIN1          | 1.59E-10    | 0.511351711 | 0.259 | 0.149 | 9.75E-06    | 1.74E+00    | macrophages    | BIN1          |
| C5orf49       | 0           | 0.511330955 | 0.59  | 0.366 | 0           | 1.612021858 | spermatid      | C5orf49       |
| DERL2         | 0           | 0.511295618 | 0.879 | 0.38  | 0           | 2.313157895 | spermatocyte   | DERL2         |
| NAMPT2        | 1.54E-52    | 0.511283259 | 0.389 | 0.15  | 9.45E-48    | 2.59E+00    | VSM_cells      | NAMPT         |
| RPS122        | 1.00E-159   | 0.511279745 | 0.925 | 0.83  | 6.16E-155   | 1.11E+00    | Leydig_cells   | RPS12         |
| PLCB2         | 1.97E-54    | 0.511062537 | 0.162 | 0.023 | 1.21E-49    | 7.04E+00    | macrophages    | PLCB2         |
| RP11-251P6.1  | 3.91E-180   | 0.511020337 | 0.354 | 0.219 | 2.40E-175   | 1.62E+00    | spermatid      | RP11-251P6.1  |
| WAS1          | 3.21E-21    | 0.510789913 | 0.158 | 0.009 | 1.97E-16    | 1.76E+01    | T_cells        | WAS           |
| GLO1          | 3.50E-69    | 0.510773272 | 0.4   | 0.121 | 2.15E-64    | 3.31E+00    | endotheliocyte | GLO1          |
| EFR3A         | 0           | 0.510758292 | 0.467 | 0.167 | 0           | 2.796407186 | spermatogonia  | EFR3A         |
| C10orf53      | 0           | 0.510688695 | 0.891 | 0.459 | 0           | 1.941176471 | spermatocyte   | C10orf53      |
| NUSAP1        | 0           | 0.510646915 | 0.705 | 0.167 | 0           | 4.221556886 | spermatocyte   | NUSAP1        |
| CNKSR3        | 6.29E-50    | 0.510631525 | 0.325 | 0.105 | 3.86E-45    | 3.10E+00    | endotheliocyte | CNKSR3        |
| TSPAN17       | 0           | 0.510490726 | 0.192 | 0.018 | 0           | 10.66666667 | Sertoli_cells  | TSPAN17       |
| PSMC6         | 0           | 0.510388103 | 0.445 | 0.158 | 0           | 2.816455696 | spermatogonia  | PSMC6         |
| SYNJ2BP       | 0           | 0.510373592 | 0.688 | 0.154 | 0           | 4.467532468 | spermatocyte   | SYNJ2BP       |
| ZFAND4        | 0           | 0.510324586 | 0.659 | 0.499 | 0           | 1.320641283 | spermatid      | ZFAND4        |
| ASPH          | 1.86E-227   | 0.510110179 | 0.296 | 0.056 | 1.14E-222   | 5.29E+00    | Leydig_cells   | ASPH          |
| CCDC74A       | 0           | 0.510071981 | 0.93  | 0.427 | 0           | 2.177985948 | spermatocyte   | CCDC74A       |
| FAM69B        | 1.94E-137   | 0.510031735 | 0.34  | 0.055 | 1.19E-132   | 6.18E+00    | endotheliocyte | FAM69B        |
| C6orf163      | 0           | 0.509983417 | 0.392 | 0.12  | 0           | 3.266666667 | spermatid      | C6orf163      |
| ZBTB20.AS1    | 0           | 0.509972167 | 0.246 | 0.066 | 0           | 3.727272727 | spermatid      | ZBTB20.AS1    |
| GPX4          | 0           | 0.509971826 | 0.981 | 0.899 | 0           | 1.091212458 | spermatid      | GPX4          |
| PKD2L2        | 0           | 0.509875185 | 0.673 | 0.11  | 0           | 6.118181818 | spermatocyte   | PKD2L2        |
| CLIC4         | 3.30E-33    | 0.509851854 | 0.476 | 0.302 | 2.02E-28    | 1.58E+00    | VSM_cells      | CLIC4         |
| CTDSPL        | 5.72E-255   | 0.509837932 | 0.378 | 0.09  | 3.51E-250   | 4.20E+00    | PTM_cells      | CTDSPL        |
| PACRG         | 0           | 0.509837898 | 0.843 | 0.303 | 0           | 2.782178218 | spermatocyte   | PACRG         |
| LRPPRC        | 3.05E-27    | 0.509340258 | 0.293 | 0.221 | 1.87E-22    | 1.33E+00    | Sertoli_cells  | LRPPRC        |
| MT.ND22       | 7.11E-07    | 0.509311874 | 0.382 | 0.386 | 0.043621693 | 0.989637306 | Leydig_cells   | MT.ND2        |
| DAB2          | 1.69E-177   | 0.509276839 | 0.367 | 0.048 | 1.03E-172   | 7.65E+00    | endotheliocyte | DAB2          |
| CDRT15L2      | 0           | 0.509233886 | 0.63  | 0.104 | 0           | 6.057692308 | spermatocyte   | CDRT15L2      |

|              |             |             |       |       |           |             |                |              |
|--------------|-------------|-------------|-------|-------|-----------|-------------|----------------|--------------|
| ZDHC3        | 0           | 0.509219507 | 0.727 | 0.608 | 0         | 1.195723684 | spermatid      | ZDHC3        |
| FPR1         | 5.32E-134   | 0.509212687 | 0.182 | 0.012 | 3.26E-129 | 1.52E+01    | macrophages    | FPR1         |
| SMIM23       | 0           | 0.509209288 | 0.357 | 0.126 | 0         | 2.833333333 | spermatid      | SMIM23       |
| PKN1         | 0           | 0.509167941 | 0.316 | 0.076 | 0         | 4.157894737 | spermatogonia  | PKN1         |
| ALS2CR12     | 0           | 0.509101627 | 0.664 | 0.174 | 0         | 3.816091954 | spermatocyte   | ALS2CR12     |
| HTRA12       | 4.20E-122   | 0.509087144 | 0.321 | 0.059 | 2.57E-117 | 5.44E+00    | VSM_cells      | HTRA1        |
| CTDSP1       | 0.000278165 | 0.509034646 | 0.184 | 0.056 | 1         | 3.285714286 | T_cells        | CTDSP1       |
| CREB3L2      | 1.85E-148   | 0.509018536 | 0.405 | 0.159 | 1.14E-143 | 2.55E+00    | PTM_cells      | CREB3L2      |
| TMEM50B      | 0           | 0.508980884 | 0.53  | 0.329 | 0         | 1.610942249 | spermatogonia  | TMEM50B      |
| YWHAB3       | 2.96E-57    | 0.508927258 | 0.649 | 0.348 | 1.82E-52  | 1.86E+00    | VSM_cells      | YWHAB        |
| CYP26B1      | 6.75E-99    | 0.508870484 | 0.189 | 0.048 | 4.14E-94  | 3.94E+00    | Leydig_cells   | CYP26B1      |
| SYCE2        | 1.67E-241   | 0.508774296 | 0.422 | 0.246 | 1.02E-236 | 1.72E+00    | spermatogonia  | SYCE2        |
| SERPINH11    | 0           | 0.508763995 | 0.418 | 0.089 | 0         | 4.696629213 | PTM_cells      | SERPINH1     |
| PTCD3        | 0           | 0.508664005 | 0.56  | 0.31  | 0         | 1.806451613 | spermatogonia  | PTCD3        |
| WISP21       | 4.18E-116   | 0.508572417 | 0.3   | 0.053 | 2.56E-111 | 5.66E+00    | VSM_cells      | WISP2        |
| GNA13        | 1.02E-11    | 0.508530491 | 0.199 | 0.095 | 6.28E-07  | 2.09E+00    | macrophages    | GNA13        |
| ZCCHC17      | 4.97E-305   | 0.508529265 | 0.557 | 0.333 | 3.05E-300 | 1.67E+00    | spermatogonia  | ZCCHC17      |
| LDHB         | 7.40E-152   | 0.508527739 | 0.533 | 0.208 | 4.54E-147 | 2.56E+00    | Leydig_cells   | LDHB         |
| PPP1R14A     | 3.08E-167   | 0.508454621 | 0.441 | 0.139 | 1.89E-162 | 3.17E+00    | Leydig_cells   | PPP1R14A     |
| EHD21        | 0           | 0.508443837 | 0.333 | 0.035 | 0         | 9.514285714 | PTM_cells      | EHD2         |
| DCDC2C       | 0           | 0.508406369 | 0.357 | 0.05  | 0         | 7.14        | spermatid      | DCDC2C       |
| UIMC1        | 0           | 0.508392741 | 0.531 | 0.263 | 0         | 2.019011407 | spermatogonia  | UIMC1        |
| PHYHD1       | 3.21E-284   | 0.50817898  | 0.239 | 0.03  | 1.97E-279 | 7.97E+00    | Leydig_cells   | PHYHD1       |
| HMGB12       | 3.36E-151   | 0.508109125 | 0.791 | 0.54  | 2.06E-146 | 1.46E+00    | PTM_cells      | HMGB1        |
| SPATA81      | 0.002165668 | 0.507869272 | 0.66  | 0.556 | 1         | 1.18705036  | mastocyte      | SPATA8       |
| TMEM258      | 7.49E-234   | 0.507672005 | 0.664 | 0.516 | 4.59E-229 | 1.29E+00    | spermatogonia  | TMEM258      |
| WASF2        | 0           | 0.507667771 | 0.646 | 0.427 | 0         | 1.512880562 | spermatogonia  | WASF2        |
| LINC00152    | 8.08E-18    | 0.507466443 | 0.132 | 0.008 | 4.95E-13  | 1.65E+01    | T_cells        | LINC00152    |
| CMTM3        | 4.01E-31    | 0.507276451 | 0.226 | 0.063 | 2.46E-26  | 3.59E+00    | macrophages    | CMTM3        |
| ABI3BP       | 2.60E-60    | 0.507239881 | 0.238 | 0.053 | 1.59E-55  | 4.49E+00    | endotheliocyte | ABI3BP       |
| ATP1B3       | 0           | 0.507230839 | 0.696 | 0.513 | 0         | 1.356725146 | spermatid      | ATP1B3       |
| AIF1L1       | 2.35E-124   | 0.507216343 | 0.194 | 0.042 | 1.44E-119 | 4.62E+00    | Leydig_cells   | AIF1L        |
| MEA1         | 0           | 0.507158284 | 0.981 | 0.622 | 0         | 1.577170418 | spermatocyte   | MEA1         |
| CDKN1A4      | 2.90E-102   | 0.506889057 | 0.292 | 0.12  | 1.78E-97  | 2.43E+00    | Sertoli_cells  | CDKN1A       |
| EZH2         | 0           | 0.506855152 | 0.858 | 0.306 | 0         | 2.803921569 | spermatocyte   | EZH2         |
| RP11.234A1.1 | 4.52E-12    | 0.506832687 | 0.182 | 0.08  | 2.77E-07  | 2.28E+00    | macrophages    | RP11.234A1.1 |
| GEMIN4       | 0           | 0.506775694 | 0.843 | 0.289 | 0         | 2.916955017 | spermatocyte   | GEMIN4       |
| CMAS         | 0           | 0.506621532 | 0.581 | 0.256 | 0         | 2.26953125  | spermatogonia  | CMAS         |
| EMP3         | 1.02E-64    | 0.506606164 | 0.457 | 0.16  | 6.27E-60  | 2.86E+00    | endotheliocyte | EMP3         |
| SLC2A8       | 0           | 0.506557126 | 0.813 | 0.288 | 0         | 2.822916667 | spermatocyte   | SLC2A8       |
| GAGE12H      | 0           | 0.506548416 | 0.191 | 0.007 | 0         | 27.28571429 | spermatogonia  | GAGE12H      |
| CGRRF1       | 0           | 0.506370294 | 0.751 | 0.271 | 0         | 2.771217712 | spermatocyte   | CGRRF1       |
| MRVI1        | 1.86E-155   | 0.506355313 | 0.362 | 0.124 | 1.14E-150 | 2.92E+00    | PTM_cells      | MRVI1        |
| JMJD1C       | 0           | 0.506339777 | 0.57  | 0.315 | 0         | 1.80952381  | spermatogonia  | JMJD1C       |
| PGK11        | 2.21E-210   | 0.506336711 | 0.453 | 0.145 | 1.36E-205 | 3.12E+00    | PTM_cells      | PGK1         |
| CATSPER3     | 0           | 0.506314189 | 0.439 | 0.221 | 0         | 1.986425339 | spermatid      | CATSPER3     |
| GATA4        | 1.22E-120   | 0.506269355 | 0.202 | 0.059 | 7.47E-116 | 3.42E+00    | Sertoli_cells  | GATA4        |
| CCDC14       | 0           | 0.50623957  | 0.526 | 0.3   | 0         | 1.753333333 | spermatogonia  | CCDC14       |
| OVOS2        | 1.48E-29    | 0.506215096 | 0.334 | 0.311 | 9.10E-25  | 1.07E+00    | spermatogonia  | OVOS2        |
| CANX         | 1.62E-244   | 0.506207559 | 0.696 | 0.608 | 9.96E-240 | 1.14E+00    | spermatogonia  | CANX         |
| HLA.DRB1     | 1.68E-17    | 0.506197025 | 0.149 | 0.056 | 1.03E-12  | 2.66E+00    | endotheliocyte | HLA.DRB1     |
| CFL1         | 5.21E-43    | 0.50619478  | 0.851 | 0.735 | 3.19E-38  | 1.16E+00    | endotheliocyte | CFL1         |
| MIDN3        | 3.83E-145   | 0.506128294 | 0.456 | 0.186 | 2.35E-140 | 2.45E+00    | PTM_cells      | MIDN         |
| S100A132     | 5.62E-251   | 0.506116826 | 0.402 | 0.099 | 3.45E-246 | 4.06E+00    | PTM_cells      | S100A13      |
| H1FX1        | 9.42E-85    | 0.506036507 | 0.323 | 0.132 | 5.78E-80  | 2.45E+00    | Leydig_cells   | H1FX         |
| SLC15A4      | 0           | 0.50599309  | 0.768 | 0.216 | 0         | 3.555555556 | spermatocyte   | SLC15A4      |
| LPIN2        | 0           | 0.505934095 | 0.367 | 0.088 | 0         | 4.170454545 | spermatogonia  | LPIN2        |
| ANGPTL4      | 1.32E-262   | 0.505893591 | 0.238 | 0.032 | 8.09E-258 | 7.44E+00    | Leydig_cells   | ANGPTL4      |
| TMEM159      | 1.92E-88    | 0.505887774 | 0.315 | 0.075 | 1.18E-83  | 4.20E+00    | VSM_cells      | TMEM159      |
| SRM          | 0           | 0.505839184 | 0.33  | 0.087 | 0         | 3.793103448 | spermatogonia  | SRM          |
| TUBA1C       | 7.28E-109   | 0.505664183 | 0.328 | 0.114 | 4.46E-104 | 2.88E+00    | Leydig_cells   | TUBA1C       |
| LDHAL6B      | 8.83E-209   | 0.505648293 | 0.353 | 0.186 | 5.42E-204 | 1.90E+00    | spermatogonia  | LDHAL6B      |
| SPO11        | 0           | 0.505609655 | 0.247 | 0.011 | 0         | 22.45454545 | spermatogonia  | SPO11        |
| NME31        | 8.76E-73    | 0.50559124  | 0.397 | 0.127 | 5.37E-68  | 3.13E+00    | VSM_cells      | NME3         |
| CUL1         | 0           | 0.505580575 | 0.66  | 0.533 | 0         | 1.238273921 | spermatid      | CUL1         |
| LRRC8A       | 2.57E-87    | 0.505576477 | 0.345 | 0.079 | 1.58E-82  | 4.37E+00    | endotheliocyte | LRRC8A       |
| WBP4         | 0           | 0.505568751 | 0.433 | 0.129 | 0         | 3.356589147 | spermatogonia  | WBP4         |
| CCDC861      | 0.000180107 | 0.505480519 | 0.44  | 0.26  | 1         | 1.692307692 | mastocyte      | CCDC86       |
| RRM1         | 0           | 0.505155806 | 0.453 | 0.217 | 0         | 2.087557604 | spermatogonia  | RRM1         |
| MRPL22       | 0           | 0.505140196 | 0.748 | 0.256 | 0         | 2.921875    | spermatocyte   | MRPL22       |
| MTCH1        | 6.69E-82    | 0.505030507 | 0.414 | 0.201 | 4.10E-77  | 2.06E+00    | Leydig_cells   | MTCH1        |
| ETS22        | 5.92E-104   | 0.505014634 | 0.309 | 0.063 | 3.63E-99  | 4.90E+00    | VSM_cells      | ETS2         |
| GFPT1        | 0           | 0.504958415 | 0.869 | 0.327 | 0         | 2.657492355 | spermatocyte   | GFPT1        |
| CDC25B       | 0.001570584 | 0.504844947 | 0.105 | 0.026 | 1         | 4.038461538 | T_cells        | CDC25B       |
| RPL281       | 5.32E-139   | 0.504774488 | 0.904 | 0.819 | 3.27E-134 | 1.10E+00    | PTM_cells      | RPL28        |

|           |             |             |       |       |             |             |                |           |
|-----------|-------------|-------------|-------|-------|-------------|-------------|----------------|-----------|
| HES12     | 7.72E-138   | 0.50466789  | 0.238 | 0.071 | 4.74E-133   | 3.35E+00    | Sertoli_cells  | HES1      |
| CPXM2     | 1.94E-168   | 0.504654577 | 0.391 | 0.135 | 1.19E-163   | 2.90E+00    | PTM_cells      | CPXM2     |
| NDUFS6    | 0           | 0.504643386 | 0.909 | 0.493 | 0           | 1.843813387 | spermatocyte   | NDUFS6    |
| CCDC39    | 0           | 0.504545701 | 0.746 | 0.206 | 0           | 3.621359223 | spermatocyte   | CCDC39    |
| MIEN1     | 0           | 0.504483581 | 0.779 | 0.278 | 0           | 2.802158273 | spermatocyte   | MIEN1     |
| CCNI1     | 2.89E-62    | 0.50446094  | 0.826 | 0.543 | 1.78E-57    | 1.52E+00    | endotheliocyte | CCNI      |
| RPS26     | 1.71E-305   | 0.504455433 | 0.681 | 0.498 | 1.05E-300   | 1.37E+00    | spermatogonia  | RPS26     |
| GYPC      | 0           | 0.504451723 | 0.343 | 0.023 | 0           | 14.91304348 | PTM_cells      | GYPC      |
| CFAP77    | 0           | 0.504409229 | 0.76  | 0.207 | 0           | 3.671497585 | spermatocyte   | CFAP77    |
| ITPR3     | 5.07E-39    | 0.504380737 | 0.26  | 0.164 | 3.11E-34    | 1.59E+00    | Sertoli_cells  | ITPR3     |
| NEDD91    | 1.32E-31    | 0.504352298 | 0.178 | 0.043 | 8.11E-27    | 4.14E+00    | macrophages    | NEDD9     |
| CSDC2     | 0           | 0.504288544 | 0.196 | 0.013 | 0           | 15.07692308 | Sertoli_cells  | CSDC2     |
| MAP3K8    | 3.99E-269   | 0.504205585 | 0.333 | 0.027 | 2.45E-264   | 1.23E+01    | endotheliocyte | MAP3K8    |
| PRKG1     | 3.55E-51    | 0.50408484  | 0.374 | 0.151 | 2.18E-46    | 2.48E+00    | VSM_cells      | PRKG1     |
| PLEKHG4   | 0           | 0.50402261  | 0.369 | 0.064 | 0           | 5.765625    | spermatogonia  | PLEKHG4   |
| NBPF1     | 1.61E-260   | 0.503966686 | 0.48  | 0.26  | 9.87E-256   | 1.85E+00    | spermatogonia  | NBPF1     |
| ATP5G3    | 0           | 0.503961823 | 0.637 | 0.401 | 0           | 1.588528678 | spermatogonia  | ATP5G3    |
| CCSER1    | 0           | 0.503924888 | 0.449 | 0.178 | 0           | 2.52247191  | spermatid      | CCSER1    |
| GLS       | 8.28E-13    | 0.503708032 | 0.263 | 0.141 | 5.08E-08    | 1.87E+00    | macrophages    | GLS       |
| ADH5      | 1.50E-52    | 0.503687116 | 0.438 | 0.293 | 9.19E-48    | 1.49E+00    | Leydig_cells   | ADH5      |
| FTMT      | 1.49E-297   | 0.503686102 | 0.586 | 0.38  | 9.13E-293   | 1.54E+00    | spermatid      | FTMT      |
| KMT2A     | 2.35E-46    | 0.503642102 | 0.397 | 0.153 | 1.44E-41    | 2.59E+00    | endotheliocyte | KMT2A     |
| MCF2      | 0           | 0.503575806 | 0.183 | 0.013 | 0           | 14.07692308 | Sertoli_cells  | MCF2      |
| WSCD1     | 0           | 0.503565722 | 0.349 | 0.053 | 0           | 6.58490566  | spermatid      | WSCD1     |
| CDC42EP1  | 4.79E-84    | 0.503565116 | 0.266 | 0.05  | 2.94E-79    | 5.32E+00    | endotheliocyte | CDC42EP1  |
| C12orf42  | 0           | 0.503563207 | 0.527 | 0.244 | 0           | 2.159836066 | spermatid      | C12orf42  |
| INHBA     | 1.56E-140   | 0.50349055  | 0.198 | 0.04  | 9.58E-136   | 4.95E+00    | Leydig_cells   | INHBA     |
| TUBA1B1   | 2.57E-24    | 0.503479311 | 0.768 | 0.726 | 1.58E-19    | 1.06E+00    | macrophages    | TUBA1B    |
| BTF31     | 1.64E-111   | 0.50334134  | 0.809 | 0.71  | 1.01E-106   | 1.14E+00    | PTM_cells      | BTF3      |
| KATNB1    | 0           | 0.503174997 | 0.81  | 0.245 | 0           | 3.306122449 | spermatocyte   | KATNB1    |
| 10-Mar    | 0           | 0.503003091 | 0.717 | 0.538 | 0           | 1.332713755 | spermatid      | 10-Mar    |
| GATM      | 2.00E-09    | 0.502915885 | 0.226 | 0.128 | 0.000122439 | 1.765625    | macrophages    | GATM      |
| RIOK3     | 0           | 0.502826062 | 0.611 | 0.442 | 0           | 1.382352941 | spermatid      | RIOK3     |
| TTL12     | 1.78E-207   | 0.502824335 | 0.214 | 0.043 | 1.09E-202   | 4.98E+00    | Sertoli_cells  | TTL12     |
| ZNF487    | 0           | 0.502823926 | 0.525 | 0.304 | 0           | 1.726973684 | spermatid      | ZNF487    |
| PHLDB2    | 4.90E-103   | 0.502818755 | 0.262 | 0.048 | 3.00E-98    | 5.46E+00    | VSM_cells      | PHLDB2    |
| CLEC4A    | 7.09E-108   | 0.502697865 | 0.182 | 0.016 | 4.35E-103   | 1.14E+01    | macrophages    | CLEC4A    |
| RGS6      | 0           | 0.50262267  | 0.421 | 0.101 | 0           | 4.168316832 | spermatid      | RGS6      |
| DYNLRB1   | 3.07E-106   | 0.502390588 | 0.565 | 0.348 | 1.88E-101   | 1.62E+00    | PTM_cells      | DYNLRB1   |
| KLF92     | 2.36E-115   | 0.50238421  | 0.371 | 0.148 | 1.45E-110   | 2.51E+00    | PTM_cells      | KLF9      |
| KLF103    | 1.35E-100   | 0.502372696 | 0.456 | 0.235 | 8.31E-96    | 1.94E+00    | PTM_cells      | KLF10     |
| CCAR1     | 0           | 0.502285853 | 0.544 | 0.298 | 0           | 1.825503356 | spermatogonia  | CCAR1     |
| DOT1L     | 0           | 0.502263773 | 0.696 | 0.255 | 0           | 2.729411765 | spermatocyte   | DOT1L     |
| CYR61     | 5.85E-91    | 0.502209312 | 0.305 | 0.109 | 3.59E-86    | 2.80E+00    | Leydig_cells   | CYR61     |
| CCDC85B2  | 6.28E-98    | 0.501996518 | 0.444 | 0.12  | 3.85E-93    | 3.70E+00    | VSM_cells      | CCDC85B   |
| TMEM14C2  | 4.09E-71    | 0.501939635 | 0.49  | 0.181 | 2.51E-66    | 2.71E+00    | VSM_cells      | TMEM14C   |
| ARPC2     | 0.005804925 | 0.501928266 | 0.763 | 0.769 | 1           | 0.992197659 | T_cells        | ARPC2     |
| CNN2      | 0           | 0.50187137  | 0.321 | 0.028 | 0           | 11.46428571 | PTM_cells      | CNN2      |
| GIMAP61   | 8.82E-23    | 0.501762722 | 0.158 | 0.009 | 5.41E-18    | 1.76E+01    | T_cells        | GIMAP6    |
| CPNE5     | 0           | 0.501759969 | 0.192 | 0.02  | 0           | 9.6         | Sertoli_cells  | CPNE5     |
| CASP4     | 0           | 0.501711154 | 0.33  | 0.013 | 0           | 25.38461538 | endotheliocyte | CASP4     |
| FAM13A    | 3.63E-124   | 0.501504351 | 0.204 | 0.059 | 2.23E-119   | 3.46E+00    | Sertoli_cells  | FAM13A    |
| RPL305    | 6.39E-113   | 0.501483437 | 0.882 | 0.878 | 3.92E-108   | 1.00E+00    | Sertoli_cells  | RPL30     |
| ZFAS11    | 3.48E-08    | 0.501442264 | 0.36  | 0.267 | 0.002135573 | 1.348314607 | macrophages    | ZFAS1     |
| SSH1      | 1.55E-76    | 0.501412517 | 0.273 | 0.057 | 9.49E-72    | 4.79E+00    | endotheliocyte | SSH1      |
| RPS265    | 2.70E-10    | 0.50134393  | 0.488 | 0.542 | 1.66E-05    | 9.00E-01    | Sertoli_cells  | RPS26     |
| KLF7      | 1.25E-10    | 0.501170764 | 0.185 | 0.089 | 7.66E-06    | 2.08E+00    | macrophages    | KLF7      |
| STAT31    | 1.21E-46    | 0.501148544 | 0.396 | 0.262 | 7.44E-42    | 1.51E+00    | Leydig_cells   | STAT3     |
| C17orf97  | 0           | 0.50114727  | 0.942 | 0.447 | 0           | 2.10738255  | spermatocyte   | C17orf97  |
| CSF3R     | 0           | 0.501131878 | 0.152 | 0.002 | 0           | 76          | macrophages    | CSF3R     |
| IFITM23   | 1.35E-220   | 0.501075956 | 0.489 | 0.149 | 8.30E-216   | 3.28E+00    | PTM_cells      | IFITM2    |
| RPS27A1   | 5.76E-26    | 0.500995502 | 0.902 | 0.86  | 3.54E-21    | 1.05E+00    | macrophages    | RPS27A    |
| FAH       | 4.44E-136   | 0.500910723 | 0.175 | 0.042 | 2.72E-131   | 4.17E+00    | Sertoli_cells  | FAH       |
| BDH2      | 0           | 0.500841395 | 0.367 | 0.036 | 0           | 10.19444444 | PTM_cells      | BDH2      |
| SNRK      | 1.29E-40    | 0.500799751 | 0.407 | 0.185 | 7.94E-36    | 2.20E+00    | endotheliocyte | SNRK      |
| ABCC4     | 1.85E-181   | 0.500645479 | 0.308 | 0.034 | 1.14E-176   | 9.06E+00    | endotheliocyte | ABCC4     |
| IDS1      | 4.38E-190   | 0.500579389 | 0.289 | 0.062 | 2.68E-185   | 4.66E+00    | Leydig_cells   | IDS       |
| KLHL23    | 3.20E-95    | 0.500559121 | 0.275 | 0.055 | 1.96E-90    | 5.00E+00    | VSM_cells      | KLHL23    |
| LINC00865 | 1.45E-235   | 0.500519979 | 0.285 | 0.127 | 8.89E-231   | 2.24E+00    | spermatogonia  | LINC00865 |
| GORASP2   | 0           | 0.500484669 | 0.521 | 0.323 | 0           | 1.613003096 | spermatid      | GORASP2   |
| MIDN1     | 2.09E-12    | 0.500359237 | 0.333 | 0.198 | 1.28E-07    | 1.68E+00    | macrophages    | MIDN      |
| RBMX      | 1.09E-51    | 0.500332288 | 0.464 | 0.183 | 6.69E-47    | 2.54E+00    | endotheliocyte | RBMX      |
| HEXB      | 5.28E-265   | 0.500305652 | 0.244 | 0.033 | 3.24E-260   | 7.39E+00    | Leydig_cells   | HEXB      |
| IFT88     | 4.65E-271   | 0.5002982   | 0.631 | 0.471 | 2.85E-266   | 1.34E+00    | spermatogonia  | IFT88     |
| KIF18A    | 0           | 0.500276839 | 0.746 | 0.185 | 0           | 4.032432432 | spermatocyte   | KIF18A    |

|        |           |             |       |       |           |          |              |        |
|--------|-----------|-------------|-------|-------|-----------|----------|--------------|--------|
| FNDC11 | 2.39E-189 | 0.500137001 | 0.274 | 0.133 | 1.47E-184 | 2.06E+00 | spermatid    | FNDC11 |
| PPIC   | 4.81E-182 | 0.500071288 | 0.329 | 0.082 | 2.95E-177 | 4.01E+00 | Leydig_cells | PPIC   |



## logFC&gt;1

|          | p_val     | avg_logFC   | pct.1 | pct.2 | p_val_adj | P1/P2       | cluster        | gene     |
|----------|-----------|-------------|-------|-------|-----------|-------------|----------------|----------|
| MGP      | 0         | 3.032405707 | 0.913 | 0.157 | 0         | 5.815286624 | endotheliocyte | MGP      |
| B2M      | 0         | 2.972316038 | 0.985 | 0.242 | 0         | 4.070247934 | endotheliocyte | B2M      |
| SELE     | 0         | 2.915731036 | 0.598 | 0.009 | 0         | 66.44444444 | endotheliocyte | SELE     |
| SPARCL1  | 0         | 2.836369742 | 0.96  | 0.155 | 0         | 6.193548387 | endotheliocyte | SPARCL1  |
| TM4SF1   | 0         | 2.568463225 | 0.921 | 0.073 | 0         | 12.61643836 | endotheliocyte | TM4SF1   |
| HLA-E    | 0         | 2.505912549 | 0.72  | 0.079 | 0         | 9.113924051 | endotheliocyte | HLA-E    |
| TMSB4X   | 3.33E-302 | 2.476110042 | 0.975 | 0.329 | 2.05E-297 | 2.96E+00    | endotheliocyte | TMSB4X   |
| VWF      | 0         | 2.37655757  | 0.878 | 0.037 | 0         | 23.72972973 | endotheliocyte | VWF      |
| IFI27    | 0         | 2.352623412 | 0.903 | 0.123 | 0         | 7.341463415 | endotheliocyte | IFI27    |
| CAV1     | 0         | 2.318789327 | 0.906 | 0.094 | 0         | 9.638297872 | endotheliocyte | CAV1     |
| TXNIP    | 0         | 2.318291856 | 0.913 | 0.163 | 0         | 5.601226994 | endotheliocyte | TXNIP    |
| EMP1     | 0         | 2.28237729  | 0.866 | 0.049 | 0         | 17.67346939 | endotheliocyte | EMP1     |
| HLA-B    | 4.73E-184 | 2.279582731 | 0.72  | 0.246 | 2.90E-179 | 2.93E+00    | endotheliocyte | HLA-B    |
| GNG11    | 0         | 2.268270205 | 0.841 | 0.044 | 0         | 19.11363636 | endotheliocyte | GNG11    |
| CCL2     | 0         | 2.228119092 | 0.603 | 0.038 | 0         | 15.86842105 | endotheliocyte | CCL2     |
| FN1      | 0         | 2.226875955 | 0.702 | 0.077 | 0         | 9.116883117 | endotheliocyte | FN1      |
| VIM      | 1.14E-253 | 2.189873203 | 0.983 | 0.444 | 7.01E-249 | 2.21E+00    | endotheliocyte | VIM      |
| HLA-C    | 3.12E-244 | 2.17739278  | 0.705 | 0.17  | 1.91E-239 | 4.15E+00    | endotheliocyte | HLA-C    |
| RPL10    | 4.34E-256 | 2.116374222 | 0.96  | 0.357 | 2.66E-251 | 2.69E+00    | endotheliocyte | RPL10    |
| CLDN5    | 0         | 2.102463603 | 0.663 | 0.013 | 0         | 51          | endotheliocyte | CLDN5    |
| HLA.E    | 1.19E-56  | 2.087502422 | 0.241 | 0.06  | 7.33E-52  | 4.02E+00    | endotheliocyte | HLA.E    |
| GSN      | 0         | 2.062933943 | 0.94  | 0.205 | 0         | 4.585365854 | endotheliocyte | GSN      |
| A2M      | 0         | 2.048504704 | 0.873 | 0.103 | 0         | 8.475728155 | endotheliocyte | A2M      |
| IER2     | 0         | 2.024419461 | 0.916 | 0.168 | 0         | 5.452380952 | endotheliocyte | IER2     |
| SOCS3    | 0         | 2.00066955  | 0.878 | 0.115 | 0         | 7.634782609 | endotheliocyte | SOCS3    |
| KLF2     | 0         | 1.990784025 | 0.861 | 0.158 | 0         | 5.449367089 | endotheliocyte | KLF2     |
| NFKBIA   | 0         | 1.987110308 | 0.886 | 0.204 | 0         | 4.343137255 | endotheliocyte | NFKBIA   |
| CXCL2    | 0         | 1.935127587 | 0.63  | 0.041 | 0         | 15.36585366 | endotheliocyte | CXCL2    |
| IER3     | 0         | 1.919546682 | 0.782 | 0.099 | 0         | 7.898989899 | endotheliocyte | IER3     |
| ZFP36    | 6.38E-304 | 1.907966106 | 0.918 | 0.234 | 3.92E-299 | 3.92E+00    | endotheliocyte | ZFP36    |
| GADD45B  | 0         | 1.890745135 | 0.906 | 0.182 | 0         | 4.978021978 | endotheliocyte | GADD45B  |
| ID1      | 0         | 1.857995236 | 0.685 | 0.064 | 0         | 10.703125   | endotheliocyte | ID1      |
| CD74     | 0         | 1.842981435 | 0.898 | 0.067 | 0         | 13.40298507 | endotheliocyte | CD74     |
| HLA-A    | 9.30E-139 | 1.834798312 | 0.712 | 0.303 | 5.70E-134 | 2.35E+00    | endotheliocyte | HLA-A    |
| JUNB     | 6.60E-250 | 1.834618804 | 0.955 | 0.34  | 4.05E-245 | 2.81E+00    | endotheliocyte | JUNB     |
| RPS4X    | 2.56E-245 | 1.830493807 | 0.95  | 0.34  | 1.57E-240 | 2.79E+00    | endotheliocyte | RPS4X    |
| IFITM3   | 0         | 1.797374488 | 0.918 | 0.187 | 0         | 4.909090909 | endotheliocyte | IFITM3   |
| TIMP3    | 0         | 1.796963116 | 0.868 | 0.167 | 0         | 5.19760479  | endotheliocyte | TIMP3    |
| MT2A     | 2.70E-259 | 1.792798492 | 0.839 | 0.224 | 1.65E-254 | 3.75E+00    | endotheliocyte | MT2A     |
| S100A6   | 0         | 1.790828899 | 0.854 | 0.122 | 0         | 7           | endotheliocyte | S100A6   |
| FOS      | 8.24E-241 | 1.767305581 | 0.931 | 0.304 | 5.06E-236 | 3.06E+00    | endotheliocyte | FOS      |
| NEAT1    | 2.98E-224 | 1.765348707 | 0.754 | 0.189 | 1.83E-219 | 3.99E+00    | endotheliocyte | NEAT1    |
| ZFP36L2  | 0         | 1.761071986 | 0.854 | 0.138 | 0         | 6.188405797 | endotheliocyte | ZFP36L2  |
| SNHG7    | 1.37E-304 | 1.72828593  | 0.794 | 0.177 | 8.43E-300 | 4.49E+00    | endotheliocyte | SNHG7    |
| EPAS1    | 0         | 1.712286748 | 0.779 | 0.074 | 0         | 10.52702703 | endotheliocyte | EPAS1    |
| CD34     | 0         | 1.682683964 | 0.801 | 0.057 | 0         | 14.05263158 | endotheliocyte | CD34     |
| PTRF     | 0         | 1.679371486 | 0.829 | 0.11  | 0         | 7.536363636 | endotheliocyte | PTRF     |
| TMSB10   | 2.08E-226 | 1.665554042 | 0.96  | 0.39  | 1.28E-221 | 2.46E+00    | endotheliocyte | TMSB10   |
| GADD45A  | 0         | 1.663365502 | 0.722 | 0.064 | 0         | 11.28125    | endotheliocyte | GADD45A  |
| IGFBP3   | 2.27E-93  | 1.660222572 | 0.166 | 0.019 | 1.39E-88  | 8.74E+00    | endotheliocyte | IGFBP3   |
| PTGS2    | 0         | 1.644212345 | 0.484 | 0.018 | 0         | 26.88888889 | endotheliocyte | PTGS2    |
| RHOB     | 9.58E-265 | 1.621925627 | 0.876 | 0.232 | 5.88E-260 | 3.78E+00    | endotheliocyte | RHOB     |
| RAMP2    | 0         | 1.609266282 | 0.759 | 0.065 | 0         | 11.67692308 | endotheliocyte | RAMP2    |
| TPT1     | 1.57E-192 | 1.599333585 | 0.983 | 0.857 | 9.61E-188 | 1.15E+00    | endotheliocyte | TPT1     |
| SAT1     | 5.88E-298 | 1.598305134 | 0.777 | 0.148 | 3.61E-293 | 5.25E+00    | endotheliocyte | SAT1     |
| IGFBP7   | 9.58E-229 | 1.59761725  | 0.906 | 0.278 | 5.88E-224 | 3.26E+00    | endotheliocyte | IGFBP7   |
| DUSP1    | 5.45E-301 | 1.595661545 | 0.829 | 0.176 | 3.34E-296 | 4.71E+00    | endotheliocyte | DUSP1    |
| SLC9A3R2 | 1.61E-207 | 1.594084037 | 0.672 | 0.17  | 9.86E-203 | 3.95E+00    | endotheliocyte | SLC9A3R2 |
| CDKN1A   | 7.69E-306 | 1.591861843 | 0.717 | 0.122 | 4.72E-301 | 5.88E+00    | endotheliocyte | CDKN1A   |
| MALAT1   | 2.34E-107 | 1.590765952 | 0.943 | 0.837 | 1.44E-102 | 1.13E+00    | endotheliocyte | MALAT1   |
| NUAK1    | 0         | 1.588474325 | 0.677 | 0.02  | 0         | 33.85       | endotheliocyte | NUAK1    |
| LRRFIP1  | 0         | 1.580697332 | 0.784 | 0.082 | 0         | 9.56097561  | endotheliocyte | LRRFIP1  |
| RPL39    | 4.76E-227 | 1.580445091 | 0.881 | 0.273 | 2.92E-222 | 3.23E+00    | endotheliocyte | RPL39    |
| IGFBP4   | 0         | 1.575891104 | 0.774 | 0.077 | 0         | 10.05194805 | endotheliocyte | IGFBP4   |
| CTGF     | 0         | 1.571751968 | 0.645 | 0.064 | 0         | 10.078125   | endotheliocyte | CTGF     |
| SOX17    | 0         | 1.568512826 | 0.663 | 0.041 | 0         | 16.17073171 | endotheliocyte | SOX17    |
| SRGN     | 0         | 1.557417248 | 0.752 | 0.044 | 0         | 17.09090909 | endotheliocyte | SRGN     |
| ID3      | 0         | 1.556311672 | 0.613 | 0.039 | 0         | 15.71794872 | endotheliocyte | ID3      |
| IFITM2   | 0         | 1.532415831 | 0.829 | 0.156 | 0         | 5.314102564 | endotheliocyte | IFITM2   |
| PRSS23   | 0         | 1.531088707 | 0.677 | 0.041 | 0         | 16.51219512 | endotheliocyte | PRSS23   |
| RPS8     | 3.04E-176 | 1.522572512 | 0.96  | 0.773 | 1.87E-171 | 1.24E+00    | endotheliocyte | RPS8     |
| RPL12    | 1.75E-150 | 1.520915214 | 0.923 | 0.631 | 1.08E-145 | 1.46E+00    | endotheliocyte | RPL12    |

|          |           |             |       |       |           |             |                |          |
|----------|-----------|-------------|-------|-------|-----------|-------------|----------------|----------|
| S100A10  | 5.16E-161 | 1.515633186 | 0.866 | 0.434 | 3.17E-156 | 2.00E+00    | endotheliocyte | S100A10  |
| PTMA1    | 7.39E-185 | 1.508545093 | 0.968 | 0.652 | 4.53E-180 | 1.48E+00    | endotheliocyte | PTMA     |
| LIFR     | 1.10E-269 | 1.497951787 | 0.739 | 0.163 | 6.73E-265 | 4.53E+00    | endotheliocyte | LIFR     |
| RPS3     | 1.70E-181 | 1.488256005 | 0.975 | 0.797 | 1.05E-176 | 1.22E+00    | endotheliocyte | RPS3     |
| CLEC14A  | 0         | 1.48514605  | 0.6   | 0.019 | 0         | 31.57894737 | endotheliocyte | CLEC14A  |
| HLA.A    | 4.32E-14  | 1.477683996 | 0.241 | 0.138 | 2.65E-09  | 1.75E+00    | endotheliocyte | HLA.A    |
| KCTD12   | 0         | 1.476527221 | 0.663 | 0.08  | 0         | 8.2875      | endotheliocyte | KCTD12   |
| BCAM     | 0         | 1.476318451 | 0.744 | 0.051 | 0         | 14.58823529 | endotheliocyte | BCAM     |
| RPL13A   | 2.53E-162 | 1.456023772 | 0.965 | 0.734 | 1.55E-157 | 1.31E+00    | endotheliocyte | RPL13A   |
| RBP7     | 0         | 1.452646007 | 0.66  | 0.074 | 0         | 8.918918919 | endotheliocyte | RBP7     |
| JUN      | 8.79E-203 | 1.452046428 | 0.935 | 0.362 | 5.39E-198 | 2.58E+00    | endotheliocyte | JUN      |
| RPL211   | 7.68E-181 | 1.451435767 | 0.955 | 0.47  | 4.71E-176 | 2.03E+00    | endotheliocyte | RPL21    |
| RPS18    | 5.00E-170 | 1.4492582   | 0.98  | 0.851 | 3.06E-165 | 1.15E+00    | endotheliocyte | RPS18    |
| SLC2A3   | 0         | 1.445875386 | 0.677 | 0.084 | 0         | 8.05952381  | endotheliocyte | SLC2A3   |
| NFIB     | 0         | 1.44290787  | 0.71  | 0.066 | 0         | 10.75757576 | endotheliocyte | NFIB     |
| RPS28    | 1.13E-146 | 1.441003683 | 0.913 | 0.606 | 6.93E-142 | 1.51E+00    | endotheliocyte | RPS28    |
| RPS22    | 1.89E-161 | 1.437454203 | 0.963 | 0.673 | 1.16E-156 | 1.43E+00    | endotheliocyte | RPS2     |
| HLA.B    | 1.20E-16  | 1.422786518 | 0.236 | 0.124 | 7.38E-12  | 1.90E+00    | endotheliocyte | HLA.B    |
| PTPRB    | 0         | 1.412004722 | 0.64  | 0.021 | 0         | 30.47619048 | endotheliocyte | PTPRB    |
| RPL10A   | 5.10E-158 | 1.410393523 | 0.931 | 0.659 | 3.13E-153 | 1.41E+00    | endotheliocyte | RPL10A   |
| FOSB     | 2.35E-209 | 1.403216114 | 0.933 | 0.335 | 1.44E-204 | 2.79E+00    | endotheliocyte | FOSB     |
| TNFSF10  | 0         | 1.39674005  | 0.682 | 0.018 | 0         | 37.88888889 | endotheliocyte | TNFSF10  |
| HLA.C    | 2.94E-36  | 1.39488016  | 0.231 | 0.076 | 1.80E-31  | 3.04E+00    | endotheliocyte | HLA.C    |
| HLA-DRA  | 0         | 1.392636751 | 0.618 | 0.021 | 0         | 29.42857143 | endotheliocyte | HLA-DRA  |
| HSPB1    | 3.82E-244 | 1.391730141 | 0.836 | 0.213 | 2.34E-239 | 3.92E+00    | endotheliocyte | HSPB1    |
| ANXA1    | 0         | 1.391355404 | 0.749 | 0.072 | 0         | 10.40277778 | endotheliocyte | ANXA1    |
| BTG2     | 0         | 1.39123906  | 0.759 | 0.123 | 0         | 6.170731707 | endotheliocyte | BTG2     |
| RAMP3    | 0         | 1.377249177 | 0.61  | 0.028 | 0         | 21.78571429 | endotheliocyte | RAMP3    |
| IFI16    | 0         | 1.371787643 | 0.712 | 0.076 | 0         | 9.368421053 | endotheliocyte | IFI16    |
| CEBPD    | 4.32E-284 | 1.368877259 | 0.655 | 0.105 | 2.65E-279 | 6.24E+00    | endotheliocyte | CEBPD    |
| ICAM1    | 0         | 1.368083735 | 0.524 | 0.043 | 0         | 12.18604651 | endotheliocyte | ICAM1    |
| STOM     | 2.03E-252 | 1.354424463 | 0.697 | 0.15  | 1.24E-247 | 4.65E+00    | endotheliocyte | STOM     |
| RPL26    | 4.33E-143 | 1.354420403 | 0.945 | 0.753 | 2.66E-138 | 1.25E+00    | endotheliocyte | RPL26    |
| EEF1A1   | 2.09E-183 | 1.35440274  | 0.99  | 0.924 | 1.28E-178 | 1.07E+00    | endotheliocyte | EEF1A1   |
| ACKR1    | 0         | 1.351787645 | 0.395 | 0.005 | 0         | 79          | endotheliocyte | ACKR1    |
| TAGLN2   | 1.29E-240 | 1.351247717 | 0.799 | 0.204 | 7.93E-236 | 3.92E+00    | endotheliocyte | TAGLN2   |
| RPS23    | 3.23E-169 | 1.351120301 | 0.98  | 0.827 | 1.98E-164 | 1.19E+00    | endotheliocyte | RPS23    |
| BHLHE40  | 0         | 1.350741753 | 0.64  | 0.043 | 0         | 14.88372093 | endotheliocyte | BHLHE40  |
| RPL41    | 2.18E-148 | 1.349520512 | 0.958 | 0.785 | 1.34E-143 | 1.22E+00    | endotheliocyte | RPL41    |
| PPP1R15A | 9.34E-244 | 1.345625542 | 0.797 | 0.188 | 5.73E-239 | 4.24E+00    | endotheliocyte | PPP1R15A |
| IRF1     | 1.55E-187 | 1.330295012 | 0.732 | 0.216 | 9.52E-183 | 3.39E+00    | endotheliocyte | IRF1     |
| BST2     | 0         | 1.33024352  | 0.749 | 0.105 | 0         | 7.133333333 | endotheliocyte | BST2     |
| RPL18A1  | 5.29E-152 | 1.326051032 | 0.888 | 0.411 | 3.24E-147 | 2.16E+00    | endotheliocyte | RPL18A   |
| RPL18    | 8.00E-144 | 1.321764054 | 0.916 | 0.569 | 4.91E-139 | 1.61E+00    | endotheliocyte | RPL18    |
| EGFL7    | 0         | 1.320021136 | 0.784 | 0.1   | 0         | 7.84        | endotheliocyte | EGFL7    |
| HLA-DRB1 | 5.24E-235 | 1.316840033 | 0.658 | 0.145 | 3.21E-230 | 4.54E+00    | endotheliocyte | HLA-DRB1 |
| GIMAP7   | 0         | 1.315428428 | 0.643 | 0.004 | 0         | 160.75      | endotheliocyte | GIMAP7   |
| RPL11    | 3.24E-159 | 1.306266067 | 0.973 | 0.824 | 1.99E-154 | 1.18E+00    | endotheliocyte | RPL11    |
| LIMS1    | 1.31E-150 | 1.300737009 | 0.7   | 0.255 | 8.05E-146 | 2.75E+00    | endotheliocyte | LIMS1    |
| ELK3     | 0         | 1.292120274 | 0.645 | 0.043 | 0         | 15          | endotheliocyte | ELK3     |
| EHD4     | 0         | 1.285877428 | 0.65  | 0.055 | 0         | 11.81818182 | endotheliocyte | EHD4     |
| SYNE2    | 2.96E-277 | 1.278477637 | 0.697 | 0.126 | 1.82E-272 | 5.53E+00    | endotheliocyte | SYNE2    |
| ETS2     | 0         | 1.274938294 | 0.65  | 0.058 | 0         | 11.20689655 | endotheliocyte | ETS2     |
| DUSP6    | 3.75E-276 | 1.27464422  | 0.546 | 0.077 | 2.30E-271 | 7.09E+00    | endotheliocyte | DUSP6    |
| RPS9     | 8.13E-170 | 1.266232601 | 0.975 | 0.836 | 4.99E-165 | 1.17E+00    | endotheliocyte | RPS9     |
| CCDC85B  | 9.56E-308 | 1.24600168  | 0.705 | 0.117 | 5.87E-303 | 6.03E+00    | endotheliocyte | CCDC85B  |
| C2CD4B   | 0         | 1.244780845 | 0.409 | 0.004 | 0         | 102.25      | endotheliocyte | C2CD4B   |
| TNFAIP3  | 5.83E-194 | 1.243957576 | 0.556 | 0.11  | 3.58E-189 | 5.05E+00    | endotheliocyte | TNFAIP3  |
| PECAM1   | 0         | 1.24388895  | 0.486 | 0.008 | 0         | 60.75       | endotheliocyte | PECAM1   |
| RPL3     | 1.27E-156 | 1.239728985 | 0.99  | 0.923 | 7.79E-152 | 1.07E+00    | endotheliocyte | RPL3     |
| GIMAP8   | 0         | 1.239721    | 0.563 | 0.003 | 0         | 187.6666667 | endotheliocyte | GIMAP8   |
| HEG1     | 0         | 1.237017124 | 0.591 | 0.051 | 0         | 11.58823529 | endotheliocyte | HEG1     |
| PALMD    | 2.16E-237 | 1.236144873 | 0.635 | 0.126 | 1.32E-232 | 5.04E+00    | endotheliocyte | PALMD    |
| MYL12A   | 7.01E-147 | 1.234017934 | 0.774 | 0.322 | 4.30E-142 | 2.40E+00    | endotheliocyte | MYL12A   |
| NFKBIZ   | 0         | 1.231870532 | 0.672 | 0.1   | 0         | 6.72        | endotheliocyte | NFKBIZ   |
| RPL23    | 5.65E-146 | 1.230244154 | 0.938 | 0.7   | 3.47E-141 | 1.34E+00    | endotheliocyte | RPL23    |
| PODXL    | 0         | 1.22848414  | 0.593 | 0.007 | 0         | 84.71428571 | endotheliocyte | PODXL    |
| RPS27A   | 2.97E-158 | 1.226920436 | 0.975 | 0.859 | 1.82E-153 | 1.14E+00    | endotheliocyte | RPS27A   |
| PTMS     | 6.62E-248 | 1.226505649 | 0.839 | 0.205 | 4.06E-243 | 4.09E+00    | endotheliocyte | PTMS     |
| HSPG2    | 0         | 1.221664378 | 0.593 | 0.052 | 0         | 11.40384615 | endotheliocyte | HSPG2    |
| ITM2A    | 0         | 1.220261336 | 0.675 | 0.069 | 0         | 9.782608696 | endotheliocyte | ITM2A    |
| JUND     | 1.61E-113 | 1.219003841 | 0.841 | 0.499 | 9.87E-109 | 1.69E+00    | endotheliocyte | JUND     |
| LMO2     | 0         | 1.218805381 | 0.563 | 0.021 | 0         | 26.80952381 | endotheliocyte | LMO2     |
| RDX1     | 7.26E-171 | 1.21233291  | 0.794 | 0.268 | 4.45E-166 | 2.96E+00    | endotheliocyte | RDX      |
| RPL36A   | 1.74E-203 | 1.208688033 | 0.64  | 0.133 | 1.07E-198 | 4.81E+00    | endotheliocyte | RPL36A   |

|          |           |             |       |       |           |             |                |          |
|----------|-----------|-------------|-------|-------|-----------|-------------|----------------|----------|
| RPS4Y1   | 4.15E-186 | 1.205525221 | 0.826 | 0.266 | 2.55E-181 | 3.11E+00    | endotheliocyte | RPS4Y1   |
| RPL6     | 6.89E-130 | 1.205347275 | 0.908 | 0.681 | 4.23E-125 | 1.33E+00    | endotheliocyte | RPL6     |
| RPS14    | 3.92E-143 | 1.203863428 | 0.96  | 0.829 | 2.40E-138 | 1.16E+00    | endotheliocyte | RPS14    |
| RPLP1    | 2.68E-144 | 1.203377743 | 0.985 | 0.763 | 1.64E-139 | 1.29E+00    | endotheliocyte | RPLP1    |
| RPL14    | 1.55E-127 | 1.200774612 | 0.901 | 0.642 | 9.52E-123 | 1.40E+00    | endotheliocyte | RPL14    |
| THBD     | 0         | 1.200266433 | 0.561 | 0.042 | 0         | 13.35714286 | endotheliocyte | THBD     |
| AHNAK    | 4.28E-255 | 1.198802743 | 0.772 | 0.163 | 2.63E-250 | 4.74E+00    | endotheliocyte | AHNAK    |
| RPS171   | 4.88E-126 | 1.196227891 | 0.896 | 0.468 | 2.99E-121 | 1.91E+00    | endotheliocyte | RPS17    |
| LMCD1    | 0         | 1.193926766 | 0.613 | 0.039 | 0         | 15.71794872 | endotheliocyte | LMCD1    |
| RPL34    | 5.22E-117 | 1.192078927 | 0.98  | 0.905 | 3.20E-112 | 1.08E+00    | endotheliocyte | RPL34    |
| CCNL1    | 3.18E-156 | 1.187100527 | 0.816 | 0.34  | 1.95E-151 | 2.40E+00    | endotheliocyte | CCNL1    |
| IFIT3    | 0         | 1.186087643 | 0.516 | 0.024 | 0         | 21.5        | endotheliocyte | IFIT3    |
| ESAM     | 0         | 1.18564561  | 0.618 | 0.014 | 0         | 44.14285714 | endotheliocyte | ESAM     |
| RPL36    | 2.43E-118 | 1.185285758 | 0.903 | 0.699 | 1.49E-113 | 1.29E+00    | endotheliocyte | RPL36    |
| CALCRL   | 0         | 1.181930641 | 0.6   | 0.006 | 0         | 100         | endotheliocyte | CALCRL   |
| TGFBR2   | 0         | 1.180118694 | 0.573 | 0.023 | 0         | 24.91304348 | endotheliocyte | TGFBR2   |
| F8       | 0         | 1.176540286 | 0.591 | 0.018 | 0         | 32.83333333 | endotheliocyte | F8       |
| LDB2     | 0         | 1.176116554 | 0.623 | 0.026 | 0         | 23.96153846 | endotheliocyte | LDB2     |
| ZFP36L1  | 1.13E-145 | 1.173945971 | 0.856 | 0.391 | 6.93E-141 | 2.19E+00    | endotheliocyte | ZFP36L1  |
| RPS191   | 8.95E-140 | 1.16908061  | 0.958 | 0.756 | 5.49E-135 | 1.27E+00    | endotheliocyte | RPS19    |
| IFI6     | 0         | 1.164181979 | 0.65  | 0.089 | 0         | 7.303370787 | endotheliocyte | IFI6     |
| ADGRF5   | 0         | 1.162702155 | 0.516 | 0.036 | 0         | 14.33333333 | endotheliocyte | ADGRF5   |
| GNB2L1   | 1.30E-74  | 1.160307049 | 0.712 | 0.468 | 8.00E-70  | 1.52E+00    | endotheliocyte | GNB2L1   |
| EDN1     | 2.16E-219 | 1.158274387 | 0.308 | 0.029 | 1.32E-214 | 1.06E+01    | endotheliocyte | EDN1     |
| RPL27A   | 4.26E-148 | 1.156193708 | 0.955 | 0.785 | 2.61E-143 | 1.22E+00    | endotheliocyte | RPL27A   |
| RPL8     | 6.07E-148 | 1.153994163 | 0.953 | 0.854 | 3.72E-143 | 1.12E+00    | endotheliocyte | RPL8     |
| TSPO     | 0         | 1.147741886 | 0.643 | 0.084 | 0         | 7.654761905 | endotheliocyte | TSPO     |
| EFNB2    | 0         | 1.145925026 | 0.558 | 0.02  | 0         | 27.9        | endotheliocyte | EFNB2    |
| RPL37    | 1.85E-159 | 1.145880837 | 0.97  | 0.803 | 1.13E-154 | 1.21E+00    | endotheliocyte | RPL37    |
| SLC25A25 | 0         | 1.140283424 | 0.573 | 0.052 | 0         | 11.01923077 | endotheliocyte | SLC25A25 |
| XAF1     | 0         | 1.139580375 | 0.581 | 0.039 | 0         | 14.8974359  | endotheliocyte | XAF1     |
| LY6E     | 0         | 1.139393541 | 0.707 | 0.11  | 0         | 6.427272727 | endotheliocyte | LY6E     |
| MT1E     | 0         | 1.132163828 | 0.546 | 0.061 | 0         | 8.950819672 | endotheliocyte | MT1E     |
| EFNA1    | 0         | 1.128753745 | 0.529 | 0.014 | 0         | 37.78571429 | endotheliocyte | EFNA1    |
| SNHG8    | 4.33E-140 | 1.12546591  | 0.747 | 0.303 | 2.65E-135 | 2.47E+00    | endotheliocyte | SNHG8    |
| ACTN4    | 2.04E-220 | 1.122427637 | 0.69  | 0.156 | 1.25E-215 | 4.42E+00    | endotheliocyte | ACTN4    |
| MMRN2    | 0         | 1.116377598 | 0.568 | 0.008 | 0         | 71          | endotheliocyte | MMRN2    |
| GIMAP4   | 0         | 1.107603444 | 0.6   | 0.003 | 0         | 200         | endotheliocyte | GIMAP4   |
| MTUS1    | 1.09E-228 | 1.098274234 | 0.625 | 0.124 | 6.66E-224 | 5.04E+00    | endotheliocyte | MTUS1    |
| RPL9     | 1.96E-154 | 1.096096034 | 0.97  | 0.873 | 1.20E-149 | 1.11E+00    | endotheliocyte | RPL9     |
| LMNA     | 1.88E-125 | 1.094074886 | 0.784 | 0.366 | 1.15E-120 | 2.14E+00    | endotheliocyte | LMNA     |
| PDLIM1   | 7.68E-289 | 1.092850036 | 0.605 | 0.091 | 4.71E-284 | 6.65E+00    | endotheliocyte | PDLIM1   |
| MYH9     | 1.64E-183 | 1.090737106 | 0.643 | 0.157 | 1.01E-178 | 4.10E+00    | endotheliocyte | MYH9     |
| SDCBP    | 5.15E-183 | 1.090142545 | 0.687 | 0.185 | 3.16E-178 | 3.71E+00    | endotheliocyte | SDCBP    |
| SDPR     | 0         | 1.087204731 | 0.444 | 0.038 | 0         | 11.68421053 | endotheliocyte | SDPR     |
| SPTBN1   | 7.27E-147 | 1.083358676 | 0.789 | 0.298 | 4.46E-142 | 2.65E+00    | endotheliocyte | SPTBN1   |
| FAM110D  | 0         | 1.082843095 | 0.469 | 0.002 | 0         | 234.5       | endotheliocyte | FAM110D  |
| CD93     | 0         | 1.079894421 | 0.541 | 0.02  | 0         | 27.05       | endotheliocyte | CD93     |
| ANXA2    | 4.03E-159 | 1.078539375 | 0.804 | 0.289 | 2.47E-154 | 2.78E+00    | endotheliocyte | ANXA2    |
| KLF6     | 1.68E-139 | 1.074170322 | 0.752 | 0.285 | 1.03E-134 | 2.64E+00    | endotheliocyte | KLF6     |
| CRHBP    | 0         | 1.073064069 | 0.449 | 0.006 | 0         | 74.83333333 | endotheliocyte | CRHBP    |
| ADIRF    | 7.29E-223 | 1.070859829 | 0.645 | 0.124 | 4.47E-218 | 5.20E+00    | endotheliocyte | ADIRF    |
| BTG1     | 1.20E-108 | 1.06954412  | 0.856 | 0.607 | 7.34E-104 | 1.41E+00    | endotheliocyte | BTG1     |
| PNRC1    | 1.66E-123 | 1.068027613 | 0.801 | 0.392 | 1.02E-118 | 2.04E+00    | endotheliocyte | PNRC1    |
| TM4SF18  | 0         | 1.063035687 | 0.491 | 0.006 | 0         | 81.83333333 | endotheliocyte | TM4SF18  |
| NOSTRIN  | 1.47E-111 | 1.061846603 | 0.591 | 0.224 | 9.02E-107 | 2.64E+00    | endotheliocyte | NOSTRIN  |
| TCF4     | 7.44E-127 | 1.061678617 | 0.749 | 0.328 | 4.56E-122 | 2.28E+00    | endotheliocyte | TCF4     |
| NPDC1    | 0         | 1.061356035 | 0.6   | 0.068 | 0         | 8.823529412 | endotheliocyte | NPDC1    |
| LDLR     | 2.99E-286 | 1.060730166 | 0.524 | 0.066 | 1.83E-281 | 7.94E+00    | endotheliocyte | LDLR     |
| EMCN     | 0         | 1.056736333 | 0.553 | 0.003 | 0         | 184.3333333 | endotheliocyte | EMCN     |
| ENG      | 0         | 1.055516562 | 0.744 | 0.101 | 0         | 7.366336634 | endotheliocyte | ENG      |
| GIMAP1   | 0         | 1.053501648 | 0.551 | 0.002 | 0         | 275.5       | endotheliocyte | GIMAP1   |
| ZFAS1    | 9.08E-129 | 1.051917456 | 0.692 | 0.262 | 5.57E-124 | 2.64E+00    | endotheliocyte | ZFAS1    |
| SOX18    | 1.72E-120 | 1.051657828 | 0.524 | 0.155 | 1.06E-115 | 3.38E+00    | endotheliocyte | SOX18    |
| ITM2B    | 4.16E-164 | 1.048151145 | 0.873 | 0.319 | 2.55E-159 | 2.74E+00    | endotheliocyte | ITM2B    |
| RPL30    | 2.76E-147 | 1.047128415 | 0.973 | 0.877 | 1.70E-142 | 1.11E+00    | endotheliocyte | RPL30    |
| FAM107A  | 1.24E-249 | 1.039817456 | 0.402 | 0.044 | 7.62E-245 | 9.14E+00    | endotheliocyte | FAM107A  |
| FXD5     | 0         | 1.034307693 | 0.536 | 0.018 | 0         | 29.77777778 | endotheliocyte | FXD5     |
| RPS15    | 3.39E-114 | 1.033851216 | 0.923 | 0.764 | 2.08E-109 | 1.21E+00    | endotheliocyte | RPS15    |
| MSN      | 0         | 1.03352218  | 0.581 | 0.063 | 0         | 9.222222222 | endotheliocyte | MSN      |
| ATF3     | 2.91E-216 | 1.032860886 | 0.615 | 0.112 | 1.79E-211 | 5.49E+00    | endotheliocyte | ATF3     |
| PSMB8    | 0         | 1.032128952 | 0.6   | 0.029 | 0         | 20.68965517 | endotheliocyte | PSMB8    |
| AP1S2    | 2.26E-279 | 1.030190651 | 0.618 | 0.095 | 1.39E-274 | 6.51E+00    | endotheliocyte | AP1S2    |
| LGALS3   | 1.88E-190 | 1.02952398  | 0.754 | 0.201 | 1.15E-185 | 3.75E+00    | endotheliocyte | LGALS3   |
| RPS3A    | 8.20E-154 | 1.026736208 | 0.98  | 0.897 | 5.03E-149 | 1.09E+00    | endotheliocyte | RPS3A    |

|           |           |             |       |       |           |             |                |          |
|-----------|-----------|-------------|-------|-------|-----------|-------------|----------------|----------|
| ADGRL4    | 1.39E-162 | 1.02468763  | 0.625 | 0.181 | 8.51E-158 | 3.45E+00    | endotheliocyte | ADGRL4   |
| RPS261    | 6.14E-69  | 1.022765567 | 0.744 | 0.535 | 3.77E-64  | 1.39E+00    | endotheliocyte | RPS26    |
| RPL24     | 2.87E-112 | 1.022623662 | 0.908 | 0.741 | 1.76E-107 | 1.23E+00    | endotheliocyte | RPL24    |
| PSMB9     | 0         | 1.020254656 | 0.573 | 0.03  | 0         | 19.1        | endotheliocyte | PSMB9    |
| RPL10P3   | 3.41E-46  | 1.020006728 | 0.211 | 0.053 | 2.09E-41  | 3.98E+00    | endotheliocyte | RPL10P3  |
| RPL32     | 2.77E-126 | 1.01894042  | 0.975 | 0.888 | 1.70E-121 | 1.10E+00    | endotheliocyte | RPL32    |
| RPS15A    | 3.50E-114 | 1.017035504 | 0.931 | 0.784 | 2.15E-109 | 1.19E+00    | endotheliocyte | RPS15A   |
| MIDN      | 1.95E-153 | 1.01627105  | 0.66  | 0.192 | 1.20E-148 | 3.44E+00    | endotheliocyte | MIDN     |
| CYYR1     | 0         | 1.015893623 | 0.558 | 0.004 | 0         | 139.5       | endotheliocyte | CYYR1    |
| ADAMTS1   | 4.25E-192 | 1.014250233 | 0.506 | 0.085 | 2.61E-187 | 5.95E+00    | endotheliocyte | ADAMTS1  |
| TSPAN7    | 0         | 1.012181941 | 0.531 | 0.007 | 0         | 75.85714286 | endotheliocyte | TSPAN7   |
| RPL22     | 6.06E-113 | 1.008194445 | 0.881 | 0.645 | 3.72E-108 | 1.37E+00    | endotheliocyte | RPL22    |
| POSTN     | 0         | 1.004912143 | 0.342 | 0.003 | 0         | 114         | endotheliocyte | POSTN    |
| HSPA1A    | 1.20E-103 | 1.004122044 | 0.762 | 0.357 | 7.36E-99  | 2.13E+00    | endotheliocyte | HSPA1A   |
| IL33      | 0         | 1.003027906 | 0.514 | 0.016 | 0         | 32.125      | endotheliocyte | IL33     |
| TACC1     | 2.95E-147 | 1.001437169 | 0.67  | 0.204 | 1.81E-142 | 3.28E+00    | endotheliocyte | TACC1    |
| RNASE1    | 1.92E-286 | 1.000831211 | 0.752 | 0.133 | 1.18E-281 | 5.65E+00    | endotheliocyte | RNASE1   |
| RPL19     | 1.86E-126 | 1.000741153 | 0.978 | 0.837 | 1.14E-121 | 1.17E+00    | endotheliocyte | RPL19    |
| DCN       | 0         | 3.633166533 | 0.98  | 0.12  | 0         | 8.166666667 | Leydig_cells   | DCN      |
| CFD       | 0         | 3.521249703 | 0.894 | 0.057 | 0         | 15.68421053 | Leydig_cells   | CFD      |
| PTGDS     | 0         | 2.849301788 | 0.991 | 0.666 | 0         | 1.487987988 | Leydig_cells   | PTGDS    |
| PLPP3     | 0         | 2.56828911  | 0.899 | 0.089 | 0         | 10.1011236  | Leydig_cells   | PLPP3    |
| SFRP1     | 0         | 2.343317747 | 0.822 | 0.073 | 0         | 11.26027397 | Leydig_cells   | SFRP1    |
| ZFP362    | 0         | 2.314730368 | 0.867 | 0.217 | 0         | 3.995391705 | Leydig_cells   | ZFP36    |
| IGF1      | 0         | 2.3134078   | 0.836 | 0.054 | 0         | 15.48148148 | Leydig_cells   | IGF1     |
| COL1A2    | 0         | 2.277689388 | 0.915 | 0.151 | 0         | 6.059602649 | Leydig_cells   | COL1A2   |
| COL1A1    | 0         | 2.271752036 | 0.862 | 0.099 | 0         | 8.707070707 | Leydig_cells   | COL1A1   |
| IGF21     | 0         | 2.247648276 | 0.816 | 0.04  | 0         | 20.4        | Leydig_cells   | IGF2     |
| IGFBP71   | 0         | 2.236594021 | 0.976 | 0.257 | 0         | 3.79766537  | Leydig_cells   | IGFBP7   |
| LTBP4     | 0         | 2.231985259 | 0.92  | 0.127 | 0         | 7.244094488 | Leydig_cells   | LTBP4    |
| FOS2      | 0         | 2.227875991 | 0.924 | 0.286 | 0         | 3.230769231 | Leydig_cells   | FOS      |
| O2-Jun    | 0         | 2.221026079 | 0.928 | 0.346 | 0         | 2.682080925 | Leydig_cells   | JUN      |
| VIM2      | 0         | 2.212831794 | 0.98  | 0.429 | 0         | 2.284382284 | Leydig_cells   | VIM      |
| DLK1      | 0         | 2.144193788 | 0.479 | 0.103 | 0         | 4.650485437 | Leydig_cells   | DLK1     |
| SOCS32    | 0         | 2.109417199 | 0.717 | 0.1   | 0         | 7.17        | Leydig_cells   | SOCS3    |
| SERPINF1  | 0         | 2.098932582 | 0.889 | 0.118 | 0         | 7.533898305 | Leydig_cells   | SERPINF1 |
| C1S       | 0         | 2.079599276 | 0.864 | 0.072 | 0         | 12          | Leydig_cells   | C1S      |
| FOSB2     | 0         | 2.06296444  | 0.859 | 0.321 | 0         | 2.676012461 | Leydig_cells   | FOSB     |
| APOE      | 0         | 2.020922295 | 0.65  | 0.17  | 0         | 3.823529412 | Leydig_cells   | APOE     |
| ITM2B2    | 0         | 1.971211108 | 0.933 | 0.3   | 0         | 3.11        | Leydig_cells   | ITM2B    |
| S100A62   | 0         | 1.970358765 | 0.823 | 0.103 | 0         | 7.990291262 | Leydig_cells   | S100A6   |
| C1R       | 0         | 1.96359901  | 0.808 | 0.058 | 0         | 13.93103448 | Leydig_cells   | C1R      |
| COL6A2    | 0         | 1.94354344  | 0.865 | 0.092 | 0         | 9.402173913 | Leydig_cells   | COL6A2   |
| JUNB2     | 0         | 1.94322526  | 0.905 | 0.325 | 0         | 2.784615385 | Leydig_cells   | JUNB     |
| ZFP36L12  | 0         | 1.926547445 | 0.861 | 0.378 | 0         | 2.277777778 | Leydig_cells   | ZFP36L1  |
| PI16      | 0         | 1.892281796 | 0.603 | 0.042 | 0         | 14.35714286 | Leydig_cells   | PI16     |
| INSL3     | 0         | 1.846744554 | 0.461 | 0.098 | 0         | 4.704081633 | Leydig_cells   | INSL3    |
| EGR12     | 0         | 1.837154908 | 0.815 | 0.239 | 0         | 3.410041841 | Leydig_cells   | EGR1     |
| CILP      | 0         | 1.837022426 | 0.715 | 0.022 | 0         | 32.5        | Leydig_cells   | CILP     |
| MGP1      | 0         | 1.83331472  | 0.883 | 0.137 | 0         | 6.445255474 | Leydig_cells   | MGP      |
| APOD      | 0         | 1.829458666 | 0.685 | 0.066 | 0         | 10.37878788 | Leydig_cells   | APOD     |
| CD632     | 0         | 1.821037911 | 0.899 | 0.266 | 0         | 3.379699248 | Leydig_cells   | CD63     |
| WISP2     | 0         | 1.820496705 | 0.648 | 0.031 | 0         | 20.90322581 | Leydig_cells   | WISP2    |
| COL3A1    | 0         | 1.813938597 | 0.712 | 0.151 | 0         | 4.715231788 | Leydig_cells   | COL3A1   |
| GSN2      | 0         | 1.81272577  | 0.762 | 0.192 | 0         | 3.96875     | Leydig_cells   | GSN      |
| PLAC9     | 0         | 1.797889685 | 0.686 | 0.061 | 0         | 11.24590164 | Leydig_cells   | PLAC9    |
| FTL2      | 0         | 1.77469336  | 0.943 | 0.51  | 0         | 1.849019608 | Leydig_cells   | FTL      |
| IFITM32   | 0         | 1.771424231 | 0.908 | 0.167 | 0         | 5.437125749 | Leydig_cells   | IFITM3   |
| ADAMTS11  | 0         | 1.750058172 | 0.62  | 0.068 | 0         | 9.117647059 | Leydig_cells   | ADAMTS1  |
| RPL102    | 0         | 1.747415614 | 0.942 | 0.34  | 0         | 2.770588235 | Leydig_cells   | RPL10    |
| MEG3      | 0         | 1.737314393 | 0.677 | 0.161 | 0         | 4.204968944 | Leydig_cells   | MEG3     |
| SERPING11 | 0         | 1.720103438 | 0.766 | 0.089 | 0         | 8.606741573 | Leydig_cells   | SERPING1 |
| CRISPLD2  | 0         | 1.714912078 | 0.699 | 0.099 | 0         | 7.060606061 | Leydig_cells   | CRISPLD2 |
| PENK      | 1.06E-278 | 1.713390984 | 0.82  | 0.512 | 6.48E-274 | 1.60E+00    | Leydig_cells   | PENK     |
| AHNAK2    | 0         | 1.704105564 | 0.78  | 0.146 | 0         | 5.342465753 | Leydig_cells   | AHNAK    |
| COL6A1    | 0         | 1.702048661 | 0.786 | 0.092 | 0         | 8.543478261 | Leydig_cells   | COL6A1   |
| SEPP11    | 0         | 1.69815959  | 0.808 | 0.079 | 0         | 10.2278481  | Leydig_cells   | SEPP1    |
| SERPINE2  | 0         | 1.693013509 | 0.783 | 0.147 | 0         | 5.326530612 | Leydig_cells   | SERPINE2 |
| B2M2      | 0         | 1.687255989 | 0.957 | 0.222 | 0         | 4.310810811 | Leydig_cells   | B2M      |
| ANXA22    | 0         | 1.68348754  | 0.853 | 0.272 | 0         | 3.136029412 | Leydig_cells   | ANXA2    |
| COL6A3    | 0         | 1.674790312 | 0.697 | 0.054 | 0         | 12.90740741 | Leydig_cells   | COL6A3   |
| TIMP11    | 0         | 1.652399069 | 0.807 | 0.14  | 0         | 5.764285714 | Leydig_cells   | TIMP1    |
| COL15A11  | 0         | 1.649542125 | 0.677 | 0.106 | 0         | 6.386792453 | Leydig_cells   | COL15A1  |
| H19       | 0         | 1.647882654 | 0.282 | 0.024 | 0         | 11.75       | Leydig_cells   | H19      |
| ISLR1     | 0         | 1.639036081 | 0.651 | 0.05  | 0         | 13.02       | Leydig_cells   | ISLR     |

|           |           |             |       |       |           |             |              |          |
|-----------|-----------|-------------|-------|-------|-----------|-------------|--------------|----------|
| NR2F21    | 0         | 1.629218716 | 0.784 | 0.143 | 0         | 5.482517483 | Leydig_cells | NR2F2    |
| ANGPTL1   | 0         | 1.618041373 | 0.708 | 0.034 | 0         | 20.82352941 | Leydig_cells | ANGPTL1  |
| MALAT12   | 6.12E-263 | 1.608386613 | 0.965 | 0.833 | 3.76E-258 | 1.16E+00    | Leydig_cells | MALAT1   |
| KLF22     | 0         | 1.590872697 | 0.711 | 0.145 | 0         | 4.903448276 | Leydig_cells | KLF2     |
| ITM2A1    | 0         | 1.582789536 | 0.643 | 0.053 | 0         | 12.13207547 | Leydig_cells | ITM2A    |
| RHOB2     | 0         | 1.56337796  | 0.756 | 0.219 | 0         | 3.452054795 | Leydig_cells | RHOB     |
| LGALS3BP  | 0         | 1.562681949 | 0.763 | 0.091 | 0         | 8.384615385 | Leydig_cells | LGALS3BP |
| LUM       | 0         | 1.554177451 | 0.389 | 0.022 | 0         | 17.68181818 | Leydig_cells | LUM      |
| OSR2      | 0         | 1.549235359 | 0.727 | 0.088 | 0         | 8.261363636 | Leydig_cells | OSR2     |
| IGFBP6    | 0         | 1.54130405  | 0.487 | 0.08  | 0         | 6.0875      | Leydig_cells | IGFBP6   |
| KLF42     | 2.04E-278 | 1.512084854 | 0.782 | 0.475 | 1.25E-273 | 1.65E+00    | Leydig_cells | KLF4     |
| IGFBP5    | 0         | 1.502298436 | 0.455 | 0.055 | 0         | 8.272727273 | Leydig_cells | IGFBP5   |
| HSPB6     | 0         | 1.499121561 | 0.63  | 0.186 | 0         | 3.387096774 | Leydig_cells | HSPB6    |
| CD811     | 0         | 1.471679064 | 0.801 | 0.296 | 0         | 2.706081081 | Leydig_cells | CD81     |
| PLTP      | 0         | 1.461885923 | 0.669 | 0.147 | 0         | 4.551020408 | Leydig_cells | PLTP     |
| TM4SF11   | 0         | 1.460147987 | 0.658 | 0.061 | 0         | 10.78688525 | Leydig_cells | TM4SF1   |
| TIMP2     | 0         | 1.454563942 | 0.836 | 0.406 | 0         | 2.0591133   | Leydig_cells | TIMP2    |
| IFITM22   | 0         | 1.454348133 | 0.751 | 0.14  | 0         | 5.364285714 | Leydig_cells | IFITM2   |
| EPHX1     | 0         | 1.448227669 | 0.69  | 0.108 | 0         | 6.388888889 | Leydig_cells | EPHX1    |
| RPS82     | 0         | 1.445120856 | 0.969 | 0.768 | 0         | 1.26171875  | Leydig_cells | RPS8     |
| SPTBN11   | 0         | 1.444462024 | 0.778 | 0.284 | 0         | 2.73943662  | Leydig_cells | SPTBN1   |
| SCARA5    | 0         | 1.440846036 | 0.526 | 0.01  | 0         | 52.6        | Leydig_cells | SCARA5   |
| GADD45B2  | 0         | 1.424966152 | 0.757 | 0.168 | 0         | 4.505952381 | Leydig_cells | GADD45B  |
| BTG22     | 0         | 1.422159044 | 0.64  | 0.11  | 0         | 5.818181818 | Leydig_cells | BTG2     |
| LGALS31   | 0         | 1.417108574 | 0.732 | 0.186 | 0         | 3.935483871 | Leydig_cells | LGALS3   |
| RPL13A2   | 0         | 1.416247622 | 0.964 | 0.728 | 0         | 1.324175824 | Leydig_cells | RPL13A   |
| PPP1R15A2 | 0         | 1.414998163 | 0.714 | 0.175 | 0         | 4.08        | Leydig_cells | PPP1R15A |
| TXNIP2    | 0         | 1.412937748 | 0.752 | 0.149 | 0         | 5.046979866 | Leydig_cells | TXNIP    |
| ZFP36L22  | 0         | 1.409230687 | 0.713 | 0.123 | 0         | 5.796747967 | Leydig_cells | ZFP36L2  |
| MMP2      | 0         | 1.405332911 | 0.661 | 0.162 | 0         | 4.080246914 | Leydig_cells | MMP2     |
| CPE       | 0         | 1.379853041 | 0.77  | 0.189 | 0         | 4.074074074 | Leydig_cells | CPE      |
| C7        | 0         | 1.368174787 | 0.295 | 0.011 | 0         | 26.81818182 | Leydig_cells | C7       |
| ENTPD2    | 0         | 1.364122544 | 0.518 | 0.022 | 0         | 23.54545455 | Leydig_cells | ENTPD2   |
| PNRC12    | 0         | 1.349104446 | 0.778 | 0.382 | 0         | 2.036649215 | Leydig_cells | PNRC1    |
| PTMS1     | 0         | 1.344447913 | 0.74  | 0.192 | 0         | 3.854166667 | Leydig_cells | PTMS     |
| FSTL1     | 0         | 1.340600374 | 0.604 | 0.061 | 0         | 9.901639344 | Leydig_cells | FSTL1    |
| CD991     | 0         | 1.339447115 | 0.789 | 0.171 | 0         | 4.614035088 | Leydig_cells | CD99     |
| EBF1      | 0         | 1.335977501 | 0.631 | 0.115 | 0         | 5.486956522 | Leydig_cells | EBF1     |
| CST31     | 0         | 1.331722646 | 0.938 | 0.409 | 0         | 2.293398533 | Leydig_cells | CST3     |
| CALD1     | 0         | 1.331094016 | 0.842 | 0.213 | 0         | 3.953051643 | Leydig_cells | CALD1    |
| ADIRF1    | 0         | 1.325742108 | 0.714 | 0.106 | 0         | 6.735849057 | Leydig_cells | ADIRF    |
| GSTP12    | 0         | 1.319459543 | 0.735 | 0.149 | 0         | 4.932885906 | Leydig_cells | GSTP1    |
| ATF32     | 0         | 1.312104382 | 0.522 | 0.102 | 0         | 5.117647059 | Leydig_cells | ATF3     |
| TIMP31    | 0         | 1.311838552 | 0.755 | 0.152 | 0         | 4.967105263 | Leydig_cells | TIMP3    |
| S100A41   | 0         | 1.310276366 | 0.48  | 0.035 | 0         | 13.71428571 | Leydig_cells | S100A4   |
| EID11     | 0         | 1.305455822 | 0.843 | 0.345 | 0         | 2.443478261 | Leydig_cells | EID1     |
| RPL392    | 0         | 1.304145175 | 0.8   | 0.26  | 0         | 3.076923077 | Leydig_cells | RPL39    |
| TSHZ2     | 0         | 1.303066271 | 0.66  | 0.086 | 0         | 7.674418605 | Leydig_cells | TSHZ2    |
| CFH1      | 0         | 1.302363733 | 0.61  | 0.043 | 0         | 14.18604651 | Leydig_cells | CFH      |
| PTN       | 5.32E-262 | 1.297309654 | 0.503 | 0.155 | 3.26E-257 | 3.25E+00    | Leydig_cells | PTN      |
| SSPN      | 0         | 1.293939362 | 0.644 | 0.073 | 0         | 8.821917808 | Leydig_cells | SSPN     |
| NBL1      | 0         | 1.289352515 | 0.591 | 0.078 | 0         | 7.576923077 | Leydig_cells | NBL1     |
| NEAT12    | 0         | 1.288207192 | 0.617 | 0.179 | 0         | 3.446927374 | Leydig_cells | NEAT1    |
| RPS4X2    | 0         | 1.285791953 | 0.896 | 0.325 | 0         | 2.756923077 | Leydig_cells | RPS4X    |
| IFI271    | 0         | 1.284828615 | 0.605 | 0.114 | 0         | 5.307017544 | Leydig_cells | IFI27    |
| BST22     | 0         | 1.28426785  | 0.695 | 0.089 | 0         | 7.808988764 | Leydig_cells | BST2     |
| LGALS1    | 0         | 1.283581267 | 0.74  | 0.185 | 0         | 4           | Leydig_cells | LGALS1   |
| PMP22     | 0         | 1.272207885 | 0.653 | 0.139 | 0         | 4.697841727 | Leydig_cells | PMP22    |
| PTCH2     | 0         | 1.271239363 | 0.507 | 0.067 | 0         | 7.567164179 | Leydig_cells | PTCH2    |
| CEBPD2    | 0         | 1.25924178  | 0.556 | 0.094 | 0         | 5.914893617 | Leydig_cells | CEBPD    |
| PSAP1     | 0         | 1.256614059 | 0.863 | 0.43  | 0         | 2.006976744 | Leydig_cells | PSAP     |
| OGN       | 0         | 1.250605492 | 0.598 | 0.056 | 0         | 10.67857143 | Leydig_cells | OGN      |
| ALDH1A3   | 0         | 1.248845245 | 0.515 | 0.033 | 0         | 15.60606061 | Leydig_cells | ALDH1A3  |
| ABCA8     | 0         | 1.239065723 | 0.603 | 0.134 | 0         | 4.5         | Leydig_cells | ABCA8    |
| IER22     | 0         | 1.238948174 | 0.686 | 0.157 | 0         | 4.369426752 | Leydig_cells | IER2     |
| FCGRT2    | 0         | 1.235643671 | 0.671 | 0.174 | 0         | 3.856321839 | Leydig_cells | FCGRT    |
| TUBA1A2   | 0         | 1.22293584  | 0.688 | 0.183 | 0         | 3.759562842 | Leydig_cells | TUBA1A   |
| KLF62     | 1.21E-261 | 1.205402406 | 0.655 | 0.276 | 7.43E-257 | 2.37E+00    | Leydig_cells | KLF6     |
| KRT13     | 1.24E-295 | 1.204452982 | 0.323 | 0.054 | 7.62E-291 | 5.98E+00    | Leydig_cells | KRT13    |
| RPL10A2   | 0         | 1.199634424 | 0.916 | 0.652 | 0         | 1.404907975 | Leydig_cells | RPL10A   |
| RPL122    | 5.07E-301 | 1.199054977 | 0.886 | 0.625 | 3.11E-296 | 1.42E+00    | Leydig_cells | RPL12    |
| MYC1      | 0         | 1.194609979 | 0.531 | 0.051 | 0         | 10.41176471 | Leydig_cells | MYC      |
| FN11      | 0         | 1.188320298 | 0.567 | 0.065 | 0         | 8.723076923 | Leydig_cells | FN1      |
| NEGR1     | 0         | 1.184893907 | 0.519 | 0.036 | 0         | 14.41666667 | Leydig_cells | NEGR1    |
| RPL232    | 0         | 1.184259527 | 0.909 | 0.694 | 0         | 1.309798271 | Leydig_cells | RPL23    |

|               |           |             |       |       |           |             |              |              |
|---------------|-----------|-------------|-------|-------|-----------|-------------|--------------|--------------|
| FBN1          | 0         | 1.179613801 | 0.555 | 0.108 | 0         | 5.138888889 | Leydig_cells | FBN1         |
| ABLIM1        | 6.07E-273 | 1.179025351 | 0.652 | 0.271 | 3.72E-268 | 2.41E+00    | Leydig_cells | ABLIM1       |
| RPL412        | 0         | 1.175891233 | 0.955 | 0.78  | 0         | 1.224358974 | Leydig_cells | RPL41        |
| MT2A1         | 4.88E-225 | 1.171968753 | 0.567 | 0.218 | 2.99E-220 | 2.60E+00    | Leydig_cells | MT2A         |
| NFIA          | 0         | 1.164439691 | 0.643 | 0.197 | 0         | 3.263959391 | Leydig_cells | NFIA         |
| EEF1A12       | 0         | 1.159985046 | 0.987 | 0.922 | 0         | 1.070498915 | Leydig_cells | EEF1A1       |
| JUND2         | 1.12E-217 | 1.153840877 | 0.781 | 0.492 | 6.87E-213 | 1.59E+00    | Leydig_cells | JUND         |
| PTRF1         | 0         | 1.153538591 | 0.612 | 0.099 | 0         | 6.181818182 | Leydig_cells | PTRF         |
| EGFR          | 0         | 1.146376351 | 0.506 | 0.049 | 0         | 10.32653061 | Leydig_cells | EGFR         |
| TUBB1         | 0         | 1.144316889 | 0.715 | 0.23  | 0         | 3.108695652 | Leydig_cells | TUBB         |
| FBLN5         | 0         | 1.140763631 | 0.529 | 0.078 | 0         | 6.782051282 | Leydig_cells | FBLN5        |
| APP1          | 0         | 1.140695341 | 0.75  | 0.328 | 0         | 2.286585366 | Leydig_cells | APP          |
| HSPA1B2       | 0         | 1.139868601 | 0.607 | 0.178 | 0         | 3.41011236  | Leydig_cells | HSPA1B       |
| RARRES2       | 0         | 1.137315346 | 0.565 | 0.065 | 0         | 8.692307692 | Leydig_cells | RARRES2      |
| THY1          | 0         | 1.134395018 | 0.453 | 0.025 | 0         | 18.12       | Leydig_cells | THY1         |
| PDGFRA        | 0         | 1.12484676  | 0.526 | 0.049 | 0         | 10.73469388 | Leydig_cells | PDGFRA       |
| EMP32         | 0         | 1.123233358 | 0.59  | 0.146 | 0         | 4.04109589  | Leydig_cells | EMP3         |
| MAF1          | 0         | 1.122772721 | 0.529 | 0.056 | 0         | 9.446428571 | Leydig_cells | MAF          |
| PCOLCE        | 0         | 1.119615693 | 0.503 | 0.101 | 0         | 4.98019802  | Leydig_cells | PCOLCE       |
| RP5.1052M9.12 | 2.32E-57  | 1.114761138 | 0.35  | 0.202 | 1.43E-52  | 1.73E+00    | Leydig_cells | RP5.1052M9.1 |
| FLRT2         | 0         | 1.113798876 | 0.523 | 0.046 | 0         | 11.36956522 | Leydig_cells | FLRT2        |
| GSTM5         | 0         | 1.112910242 | 0.47  | 0.058 | 0         | 8.103448276 | Leydig_cells | GSTM5        |
| DPEP1         | 0         | 1.10689794  | 0.568 | 0.153 | 0         | 3.712418301 | Leydig_cells | DPEP1        |
| C11orf96      | 0         | 1.104558804 | 0.705 | 0.258 | 0         | 2.73255814  | Leydig_cells | C11orf96     |
| DPT           | 0         | 1.103779379 | 0.454 | 0.029 | 0         | 15.65517241 | Leydig_cells | DPT          |
| FTH12         | 0         | 1.102735229 | 0.969 | 0.712 | 0         | 1.360955056 | Leydig_cells | FTH1         |
| LRP11         | 0         | 1.102180729 | 0.562 | 0.064 | 0         | 8.78125     | Leydig_cells | LRP1         |
| DUSP12        | 0         | 1.102081439 | 0.65  | 0.166 | 0         | 3.915662651 | Leydig_cells | DUSP1        |
| PRRX1         | 1.55E-264 | 1.09886664  | 0.75  | 0.393 | 9.48E-260 | 1.91E+00    | Leydig_cells | PRRX1        |
| SNED1         | 0         | 1.098710445 | 0.494 | 0.041 | 0         | 12.04878049 | Leydig_cells | SNED1        |
| ECM2          | 0         | 1.095150564 | 0.514 | 0.044 | 0         | 11.68181818 | Leydig_cells | ECM2         |
| RPL10P32      | 5.78E-275 | 1.094791612 | 0.287 | 0.046 | 3.54E-270 | 6.24E+00    | Leydig_cells | RPL10P3      |
| FXYD6         | 0         | 1.093906174 | 0.595 | 0.093 | 0         | 6.397849462 | Leydig_cells | FXYD6        |
| RPL18A3       | 1.84E-260 | 1.093560693 | 0.803 | 0.401 | 1.13E-255 | 2.00E+00    | Leydig_cells | RPL18A       |
| ACTB2         | 0         | 1.093308235 | 0.925 | 0.572 | 0         | 1.617132867 | Leydig_cells | ACTB         |
| HHIP          | 0         | 1.092075877 | 0.468 | 0.015 | 0         | 31.2        | Leydig_cells | HHIP         |
| RPS182        | 0         | 1.090066004 | 0.973 | 0.848 | 0         | 1.14740566  | Leydig_cells | RPS18        |
| PKDCC         | 0         | 1.079063574 | 0.435 | 0.044 | 0         | 9.886363636 | Leydig_cells | PKDCC        |
| SPARCL11      | 0         | 1.076576176 | 0.784 | 0.14  | 0         | 5.6         | Leydig_cells | SPARCL1      |
| NUCKS11       | 1.36E-267 | 1.074297792 | 0.742 | 0.387 | 8.35E-263 | 1.92E+00    | Leydig_cells | NUCKS1       |
| MT-ATP62      | 2.97E-88  | 1.072513754 | 0.61  | 0.427 | 1.82E-83  | 1.43E+00    | Leydig_cells | MT-ATP6      |
| RPL182        | 1.10E-268 | 1.067955012 | 0.875 | 0.56  | 6.76E-264 | 1.56E+00    | Leydig_cells | RPL18        |
| SFRP4         | 0         | 1.067575362 | 0.382 | 0.04  | 0         | 9.55        | Leydig_cells | SFRP4        |
| LY6E1         | 0         | 1.057105587 | 0.562 | 0.1   | 0         | 5.62        | Leydig_cells | LY6E         |
| TMSB4X2       | 0         | 1.054390109 | 0.908 | 0.314 | 0         | 2.891719745 | Leydig_cells | TMSB4X       |
| MYADM1        | 1.27E-212 | 1.052694682 | 0.546 | 0.21  | 7.81E-208 | 2.60E+00    | Leydig_cells | MYADM        |
| NDRG2         | 0         | 1.050426519 | 0.497 | 0.063 | 0         | 7.888888889 | Leydig_cells | NDRG2        |
| KCTD122       | 0         | 1.048578006 | 0.51  | 0.071 | 0         | 7.183098592 | Leydig_cells | KCTD12       |
| FBLN2         | 0         | 1.047158475 | 0.504 | 0.071 | 0         | 7.098591549 | Leydig_cells | FBLN2        |
| LMNA2         | 2.60E-267 | 1.046743052 | 0.726 | 0.357 | 1.60E-262 | 2.03E+00    | Leydig_cells | LMNA         |
| RHOBTB3       | 0         | 1.046622568 | 0.575 | 0.121 | 0         | 4.752066116 | Leydig_cells | RHOBTB3      |
| DAB22         | 0         | 1.04620679  | 0.492 | 0.033 | 0         | 14.90909091 | Leydig_cells | DAB2         |
| TPT12         | 0         | 1.045331013 | 0.975 | 0.854 | 0         | 1.141686183 | Leydig_cells | TPT1         |
| ARX           | 0         | 1.042068175 | 0.451 | 0.032 | 0         | 14.09375    | Leydig_cells | ARX          |
| ENG1          | 0         | 1.04088765  | 0.636 | 0.087 | 0         | 7.310344828 | Leydig_cells | ENG          |
| CLEC3B        | 0         | 1.038076697 | 0.485 | 0.085 | 0         | 5.705882353 | Leydig_cells | CLEC3B       |
| NFKBIA2       | 0         | 1.036400864 | 0.676 | 0.194 | 0         | 3.484536082 | Leydig_cells | NFKBIA       |
| PPIB          | 9.65E-237 | 1.035017928 | 0.627 | 0.279 | 5.92E-232 | 2.25E+00    | Leydig_cells | PPIB         |
| MT-CYB2       | 3.40E-101 | 1.034136896 | 0.608 | 0.389 | 2.09E-96  | 1.56E+00    | Leydig_cells | MT-CYB       |
| PRDX21        | 0         | 1.031716599 | 0.585 | 0.09  | 0         | 6.5         | Leydig_cells | PRDX2        |
| EMP11         | 0         | 1.030902574 | 0.436 | 0.045 | 0         | 9.688888889 | Leydig_cells | EMP1         |
| HLA-A2        | 4.62E-139 | 1.023656583 | 0.548 | 0.298 | 2.83E-134 | 1.84E+00    | Leydig_cells | HLA-A        |
| FGFR11        | 0         | 1.021635475 | 0.538 | 0.118 | 0         | 4.559322034 | Leydig_cells | FGFR1        |
| RPLP12        | 0         | 1.019549611 | 0.966 | 0.758 | 0         | 1.274406332 | Leydig_cells | RPLP1        |
| MT-ND32       | 2.02E-108 | 1.014141965 | 0.601 | 0.365 | 1.24E-103 | 1.65E+00    | Leydig_cells | MT-ND3       |
| LHFP          | 5.36E-242 | 1.012497173 | 0.547 | 0.202 | 3.29E-237 | 2.71E+00    | Leydig_cells | LHFP         |
| CAV11         | 0         | 1.008787582 | 0.601 | 0.084 | 0         | 7.154761905 | Leydig_cells | CAV1         |
| GADD45G       | 0         | 1.008432318 | 0.429 | 0.064 | 0         | 6.703125    | Leydig_cells | GADD45G      |
| LEPROT1       | 0         | 1.008343201 | 0.574 | 0.156 | 0         | 3.679487179 | Leydig_cells | LEPROT       |
| NRK           | 0         | 1.004504364 | 0.415 | 0.016 | 0         | 25.9375     | Leydig_cells | NRK          |
| RPL213        | 4.73E-299 | 1.002446263 | 0.905 | 0.459 | 2.90E-294 | 1.97E+00    | Leydig_cells | RPL21        |
| CD741         | 0         | 4.589360307 | 0.939 | 0.07  | 0         | 13.41428571 | macrophages  | CD74         |
| CXCL8         | 0         | 4.335967189 | 0.842 | 0.024 | 0         | 35.08333333 | macrophages  | CXCL8        |
| HLA.DRA       | 0         | 4.081392803 | 0.552 | 0.018 | 0         | 30.66666667 | macrophages  | HLA.DRA      |
| CCL3L3        | 0         | 4.004574474 | 0.811 | 0.023 | 0         | 35.26086957 | macrophages  | CCL3L3       |

|           |           |             |       |       |           |             |             |          |
|-----------|-----------|-------------|-------|-------|-----------|-------------|-------------|----------|
| CCL4L2    | 0         | 3.863038733 | 0.811 | 0.017 | 0         | 47.70588235 | macrophages | CCL4L2   |
| IL1B      | 0         | 3.839781479 | 0.788 | 0.015 | 0         | 52.53333333 | macrophages | IL1B     |
| CCL3      | 0         | 3.810209385 | 0.788 | 0.011 | 0         | 71.63636364 | macrophages | CCL3     |
| HLA-DRA1  | 6.35E-294 | 3.715834332 | 0.384 | 0.026 | 3.90E-289 | 1.48E+01    | macrophages | HLA-DRA  |
| HLA.DRB11 | 0         | 3.378041701 | 0.556 | 0.051 | 0         | 10.90196078 | macrophages | HLA.DRB1 |
| SRGN1     | 0         | 3.360395466 | 0.889 | 0.046 | 0         | 19.32608696 | macrophages | SRGN     |
| CCL4      | 0         | 3.278722374 | 0.731 | 0.056 | 0         | 13.05357143 | macrophages | CCL4     |
| CXCL31    | 0         | 3.207505116 | 0.71  | 0.024 | 0         | 29.58333333 | macrophages | CXCL3    |
| HLA.DPA1  | 0         | 3.111717823 | 0.539 | 0.008 | 0         | 67.375      | macrophages | HLA.DPA1 |
| RGS1      | 0         | 3.005160059 | 0.768 | 0.005 | 0         | 153.6       | macrophages | RGS1     |
| CXCL21    | 0         | 3.001068413 | 0.774 | 0.042 | 0         | 18.42857143 | macrophages | CXCL2    |
| GPR183    | 0         | 2.983887021 | 0.781 | 0.006 | 0         | 130.1666667 | macrophages | GPR183   |
| TNFAIP31  | 0         | 2.95978865  | 0.815 | 0.109 | 0         | 7.47706422  | macrophages | TNFAIP3  |
| NFKBIA1   | 2.75E-242 | 2.859832344 | 0.855 | 0.207 | 1.69E-237 | 4.13E+00    | macrophages | NFKBIA   |
| CD83      | 0         | 2.835161206 | 0.828 | 0.063 | 0         | 13.14285714 | macrophages | CD83     |
| HLA.DQA1  | 0         | 2.811853558 | 0.508 | 0.004 | 0         | 127         | macrophages | HLA.DQA1 |
| HLA-DPB11 | 1.78E-213 | 2.806914001 | 0.357 | 0.032 | 1.09E-208 | 1.12E+01    | macrophages | HLA-DPB1 |
| KLF61     | 7.89E-195 | 2.760582322 | 0.865 | 0.285 | 4.84E-190 | 3.04E+00    | macrophages | KLF6     |
| HLA-DPA11 | 8.53E-263 | 2.737647298 | 0.347 | 0.024 | 5.23E-258 | 1.45E+01    | macrophages | HLA-DPA1 |
| HLA.DPB1  | 0         | 2.69855066  | 0.542 | 0.005 | 0         | 108.4       | macrophages | HLA.DPB1 |
| HLA-DRB11 | 1.36E-34  | 2.696634654 | 0.357 | 0.15  | 8.33E-30  | 2.38E+00    | macrophages | HLA-DRB1 |
| HLA.DRB5  | 0         | 2.678477625 | 0.471 | 0.015 | 0         | 31.4        | macrophages | HLA.DRB5 |
| NLRP3     | 0         | 2.634359563 | 0.7   | 0.007 | 0         | 100         | macrophages | NLRP3    |
| B2M1      | 1.20E-272 | 2.609591997 | 0.963 | 0.245 | 7.35E-268 | 3.93E+00    | macrophages | B2M      |
| HLA.DQB1  | 0         | 2.528569358 | 0.502 | 0.021 | 0         | 23.9047619  | macrophages | HLA.DQB1 |
| FTL1      | 1.08E-161 | 2.470003802 | 0.963 | 0.523 | 6.62E-157 | 1.84E+00    | macrophages | FTL      |
| ANXA11    | 0         | 2.42010897  | 0.724 | 0.075 | 0         | 9.653333333 | macrophages | ANXA1    |
| NR4A21    | 1.15E-295 | 2.413191552 | 0.811 | 0.143 | 7.05E-291 | 5.67E+00    | macrophages | NR4A2    |
| TYROBP    | 0         | 2.409168261 | 0.815 | 0.004 | 0         | 203.75      | macrophages | TYROBP   |
| C1QA      | 0         | 2.381767492 | 0.68  | 0.002 | 0         | 340         | macrophages | C1QA     |
| C5AR1     | 0         | 2.38172501  | 0.633 | 0.017 | 0         | 37.23529412 | macrophages | C5AR1    |
| NFKBIZ1   | 0         | 2.361850579 | 0.801 | 0.101 | 0         | 7.930693069 | macrophages | NFKBIZ   |
| FTH1P10   | 7.89E-99  | 2.315698459 | 0.539 | 0.158 | 4.84E-94  | 3.41E+00    | macrophages | FTH1P10  |
| SAT11     | 6.92E-271 | 2.294417693 | 0.815 | 0.15  | 4.24E-266 | 5.43E+00    | macrophages | SAT1     |
| IER31     | 2.18E-255 | 2.287986297 | 0.68  | 0.103 | 1.34E-250 | 6.60E+00    | macrophages | IER3     |
| TMSB4X1   | 1.10E-194 | 2.264526486 | 0.949 | 0.332 | 6.72E-190 | 2.86E+00    | macrophages | TMSB4X   |
| BCL2A1    | 0         | 2.257895857 | 0.599 | 0.015 | 0         | 39.93333333 | macrophages | BCL2A1   |
| RGS2      | 2.38E-220 | 2.2522595   | 0.694 | 0.133 | 1.46E-215 | 5.22E+00    | macrophages | RGS2     |
| PLAUR     | 0         | 2.248061266 | 0.714 | 0.024 | 0         | 29.75       | macrophages | PLAUR    |
| S100A4    | 0         | 2.188441483 | 0.724 | 0.046 | 0         | 15.73913043 | macrophages | S100A4   |
| LYZ       | 0         | 2.184696671 | 0.653 | 0.003 | 0         | 217.6666667 | macrophages | LYZ      |
| FTH11     | 8.89E-143 | 2.140501428 | 0.98  | 0.72  | 5.45E-138 | 1.36E+00    | macrophages | FTH1     |
| MS4A6A    | 0         | 2.135819205 | 0.724 | 0.005 | 0         | 144.8       | macrophages | MS4A6A   |
| HLA.E1    | 1.22E-269 | 2.104158287 | 0.532 | 0.058 | 7.47E-265 | 9.17E+00    | macrophages | HLA.E    |
| DUSP11    | 1.27E-202 | 2.093974562 | 0.781 | 0.18  | 7.79E-198 | 4.34E+00    | macrophages | DUSP1    |
| SGK1      | 1.79E-177 | 2.061884473 | 0.7   | 0.173 | 1.10E-172 | 4.05E+00    | macrophages | SGK1     |
| C1QB      | 0         | 2.056014741 | 0.556 | 0.002 | 0         | 278         | macrophages | C1QB     |
| C1QC      | 0         | 2.051554057 | 0.552 | 0.002 | 0         | 276         | macrophages | C1QC     |
| HLA.B1    | 1.14E-127 | 2.04643206  | 0.532 | 0.121 | 7.02E-123 | 4.40E+00    | macrophages | HLA.B    |
| LAPTM5    | 0         | 2.033019968 | 0.684 | 0.007 | 0         | 97.71428571 | macrophages | LAPTM5   |
| SEPP1     | 3.86E-105 | 2.031029956 | 0.471 | 0.106 | 2.37E-100 | 4.44E+00    | macrophages | SEPP1    |
| PLEK      | 0         | 2.028361081 | 0.65  | 0.012 | 0         | 54.16666667 | macrophages | PLEK     |
| CD14      | 0         | 2.017035062 | 0.613 | 0.01  | 0         | 61.3        | macrophages | CD14     |
| FCER1A    | 0         | 2.015355891 | 0.438 | 0.002 | 0         | 219         | macrophages | FCER1A   |
| CST3      | 5.11E-164 | 1.982393292 | 0.963 | 0.426 | 3.13E-159 | 2.26E+00    | macrophages | CST3     |
| FCER1G    | 0         | 1.979915598 | 0.613 | 0.005 | 0         | 122.6       | macrophages | FCER1G   |
| HLA-DQA1  | 0         | 1.979835595 | 0.337 | 0.003 | 0         | 112.3333333 | macrophages | HLA-DQA1 |
| ID21      | 7.33E-256 | 1.975583075 | 0.717 | 0.119 | 4.50E-251 | 6.03E+00    | macrophages | ID2      |
| PPP1R15A1 | 3.57E-203 | 1.963287413 | 0.798 | 0.191 | 2.19E-198 | 4.18E+00    | macrophages | PPP1R15A |
| AIF1      | 0         | 1.938875441 | 0.657 | 0.002 | 0         | 328.5       | macrophages | AIF1     |
| HLA-DRB51 | 7.74E-56  | 1.915584107 | 0.313 | 0.081 | 4.75E-51  | 3.86E+00    | macrophages | HLA-DRB5 |
| CXCR4     | 0         | 1.868015577 | 0.451 | 0.012 | 0         | 37.58333333 | macrophages | CXCR4    |
| NR4A3     | 0         | 1.806387654 | 0.549 | 0.031 | 0         | 17.70967742 | macrophages | NR4A3    |
| HLA-DQB1  | 4.81E-274 | 1.804545277 | 0.32  | 0.019 | 2.95E-269 | 1.68E+01    | macrophages | HLA-DQB1 |
| NAMPT1    | 8.62E-183 | 1.793723594 | 0.68  | 0.148 | 5.29E-178 | 4.59E+00    | macrophages | NAMPT    |
| ZFP36L21  | 3.80E-194 | 1.787303812 | 0.707 | 0.142 | 2.33E-189 | 4.98E+00    | macrophages | ZFP36L2  |
| MAFB      | 1.53E-305 | 1.77791731  | 0.572 | 0.06  | 9.41E-301 | 9.53E+00    | macrophages | MAFB     |
| CTSS      | 0         | 1.771926579 | 0.657 | 0.019 | 0         | 34.57894737 | macrophages | CTSS     |
| NR4A1     | 8.02E-128 | 1.726285447 | 0.758 | 0.256 | 4.92E-123 | 2.96E+00    | macrophages | NR4A1    |
| ZFP361    | 8.31E-187 | 1.723357055 | 0.869 | 0.237 | 5.09E-182 | 3.67E+00    | macrophages | ZFP36    |
| FCGR2A    | 0         | 1.722879297 | 0.643 | 0.045 | 0         | 14.28888889 | macrophages | FCGR2A   |
| HLA.A1    | 3.29E-105 | 1.700070092 | 0.522 | 0.135 | 2.02E-100 | 3.87E+00    | macrophages | HLA.A    |
| PNRC11    | 1.56E-128 | 1.698288589 | 0.852 | 0.393 | 9.56E-124 | 2.17E+00    | macrophages | PNRC1    |
| HSPA1A1   | 1.21E-65  | 1.694760997 | 0.694 | 0.36  | 7.42E-61  | 1.93E+00    | macrophages | HSPA1A   |
| ITGB2     | 0         | 1.692615818 | 0.616 | 0.003 | 0         | 205.3333333 | macrophages | ITGB2    |



|               |           |             |       |       |           |             |             |              |
|---------------|-----------|-------------|-------|-------|-----------|-------------|-------------|--------------|
| TSC22D31      | 2.25E-153 | 1.69126961  | 0.626 | 0.142 | 1.38E-148 | 4.41E+00    | macrophages | TSC22D3      |
| PTGS21        | 0         | 1.68912041  | 0.488 | 0.02  | 0         | 24.4        | macrophages | PTGS2        |
| CD163         | 0         | 1.675680789 | 0.572 | 0.023 | 0         | 24.86956522 | macrophages | CD163        |
| FOSB1         | 3.10E-136 | 1.667658354 | 0.875 | 0.338 | 1.90E-131 | 2.59E+00    | macrophages | FOSB         |
| FGL2          | 0         | 1.643122658 | 0.586 | 0.055 | 0         | 10.65454545 | macrophages | FGL2         |
| CEBPD1        | 9.08E-183 | 1.620356599 | 0.603 | 0.108 | 5.57E-178 | 5.58E+00    | macrophages | CEBPD        |
| NEAT11        | 3.80E-84  | 1.61752173  | 0.599 | 0.193 | 2.33E-79  | 3.10E+00    | macrophages | NEAT1        |
| MCL11         | 6.55E-108 | 1.609226058 | 0.865 | 0.526 | 4.02E-103 | 1.64E+00    | macrophages | MCL1         |
| PTPRC         | 0         | 1.598383553 | 0.569 | 0.014 | 0         | 40.64285714 | macrophages | PTPRC        |
| CSF1R         | 0         | 1.576215485 | 0.545 | 0.026 | 0         | 20.96153846 | macrophages | CSF1R        |
| MS4A7         | 0         | 1.56799413  | 0.535 | 0.006 | 0         | 89.16666667 | macrophages | MS4A7        |
| CYBA          | 0         | 1.553744983 | 0.529 | 0.035 | 0         | 15.11428571 | macrophages | CYBA         |
| P2RY13        | 0         | 1.548824962 | 0.458 | 0.001 | 0         | 458         | macrophages | P2RY13       |
| DUSP61        | 3.33E-125 | 1.54804193  | 0.438 | 0.08  | 2.04E-120 | 5.48E+00    | macrophages | DUSP6        |
| BTG11         | 9.83E-71  | 1.546449127 | 0.798 | 0.609 | 6.03E-66  | 1.31E+00    | macrophages | BTG1         |
| STK17B        | 2.01E-121 | 1.543343985 | 0.582 | 0.157 | 1.24E-116 | 3.71E+00    | macrophages | STK17B       |
| FOS1          | 2.20E-119 | 1.54216855  | 0.835 | 0.308 | 1.35E-114 | 2.71E+00    | macrophages | FOS          |
| CLEC7A        | 0         | 1.531270952 | 0.549 | 0.006 | 0         | 91.5        | macrophages | CLEC7A       |
| HLA.C1        | 4.11E-123 | 1.528681743 | 0.421 | 0.074 | 2.52E-118 | 5.69E+00    | macrophages | HLA.C        |
| ACTB1         | 3.64E-106 | 1.509246123 | 0.926 | 0.583 | 2.23E-101 | 1.59E+00    | macrophages | ACTB         |
| CCL21         | 1.52E-57  | 1.493944747 | 0.236 | 0.044 | 9.32E-53  | 5.36E+00    | macrophages | CCL2         |
| PDE4B         | 0         | 1.490090213 | 0.498 | 0.043 | 0         | 11.58139535 | macrophages | PDE4B        |
| PMAIP1        | 3.56E-241 | 1.485698813 | 0.418 | 0.038 | 2.18E-236 | 1.10E+01    | macrophages | PMAIP1       |
| CTSB          | 3.02E-91  | 1.481805526 | 0.606 | 0.215 | 1.85E-86  | 2.82E+00    | macrophages | CTSB         |
| DUSP2         | 3.79E-274 | 1.480870762 | 0.492 | 0.047 | 2.32E-269 | 1.05E+01    | macrophages | DUSP2        |
| OTUD1         | 1.21E-105 | 1.477728232 | 0.539 | 0.147 | 7.40E-101 | 3.67E+00    | macrophages | OTUD1        |
| TPT11         | 1.71E-118 | 1.466023672 | 0.976 | 0.858 | 1.05E-113 | 1.14E+00    | macrophages | TPT1         |
| IER51         | 9.30E-132 | 1.456255253 | 0.566 | 0.131 | 5.71E-127 | 4.32E+00    | macrophages | IER5         |
| ETS21         | 3.39E-271 | 1.448159374 | 0.552 | 0.062 | 2.08E-266 | 8.90E+00    | macrophages | ETS2         |
| SMAP2         | 3.10E-92  | 1.43918841  | 0.593 | 0.21  | 1.90E-87  | 2.82E+00    | macrophages | SMAP2        |
| MT.ND51       | 5.47E-38  | 1.429534216 | 0.559 | 0.315 | 3.35E-33  | 1.77E+00    | macrophages | MT.ND5       |
| ZFP36L11      | 8.41E-76  | 1.429311507 | 0.744 | 0.394 | 5.16E-71  | 1.89E+00    | macrophages | ZFP36L1      |
| HERPUD1       | 6.16E-62  | 1.428363921 | 0.657 | 0.364 | 3.78E-57  | 1.80E+00    | macrophages | HERPUD1      |
| ICAM11        | 3.79E-277 | 1.417728326 | 0.488 | 0.046 | 2.33E-272 | 1.06E+01    | macrophages | ICAM1        |
| ALOX5AP       | 0         | 1.416322288 | 0.508 | 0.019 | 0         | 26.73684211 | macrophages | ALOX5AP      |
| VSIG4         | 0         | 1.409376174 | 0.512 | 0.023 | 0         | 22.26086957 | macrophages | VSIG4        |
| F13A1         | 2.09E-302 | 1.409151797 | 0.451 | 0.036 | 1.28E-297 | 1.25E+01    | macrophages | F13A1        |
| CDKN1A1       | 1.34E-141 | 1.406740432 | 0.589 | 0.126 | 8.24E-137 | 4.67E+00    | macrophages | CDKN1A       |
| CLEC10A       | 0         | 1.404909148 | 0.471 | 0.003 | 0         | 157         | macrophages | CLEC10A      |
| GPX1          | 1.31E-82  | 1.402103083 | 0.721 | 0.355 | 8.01E-78  | 2.03E+00    | macrophages | GPX1         |
| PSAP          | 7.38E-86  | 1.394293098 | 0.828 | 0.444 | 4.53E-81  | 1.86E+00    | macrophages | PSAP         |
| PDK41         | 1.53E-36  | 1.393845721 | 0.29  | 0.093 | 9.38E-32  | 3.12E+00    | macrophages | PDK4         |
| OLR1          | 7.97E-143 | 1.390540871 | 0.401 | 0.059 | 4.89E-138 | 6.80E+00    | macrophages | OLR1         |
| TNF           | 0         | 1.38956989  | 0.32  | 0.004 | 0         | 80          | macrophages | TNF          |
| CYBB          | 0         | 1.38168933  | 0.448 | 0.002 | 0         | 224         | macrophages | CYBB         |
| MARCKS1       | 1.60E-81  | 1.37776138  | 0.623 | 0.254 | 9.79E-77  | 2.45E+00    | macrophages | MARCKS       |
| ATF31         | 1.77E-142 | 1.369860206 | 0.569 | 0.114 | 1.09E-137 | 4.99E+00    | macrophages | ATF3         |
| FCGR2B        | 0         | 1.369614344 | 0.444 | 0.008 | 0         | 55.5        | macrophages | FCGR2B       |
| IER21         | 4.99E-106 | 1.368906945 | 0.63  | 0.175 | 3.06E-101 | 3.60E+00    | macrophages | IER2         |
| TMSB101       | 1.15E-137 | 1.366977128 | 0.933 | 0.392 | 7.03E-133 | 2.38E+00    | macrophages | TMSB10       |
| MRC1          | 6.31E-150 | 1.365404231 | 0.458 | 0.075 | 3.87E-145 | 6.11E+00    | macrophages | MRC1         |
| MALAT11       | 2.20E-63  | 1.362323653 | 0.963 | 0.837 | 1.35E-58  | 1.15E+00    | macrophages | MALAT1       |
| ITM2B1        | 1.25E-123 | 1.339999335 | 0.852 | 0.321 | 7.64E-119 | 2.65E+00    | macrophages | ITM2B        |
| GLIPR1        | 8.17E-133 | 1.337599202 | 0.539 | 0.12  | 5.01E-128 | 4.49E+00    | macrophages | GLIPR1       |
| FXYD51        | 0         | 1.336513124 | 0.502 | 0.021 | 0         | 23.9047619  | macrophages | FXYD5        |
| OGFRL1        | 0         | 1.331495733 | 0.498 | 0.025 | 0         | 19.92       | macrophages | OGFRL1       |
| RNASE11       | 3.80E-29  | 1.329476076 | 0.347 | 0.14  | 2.33E-24  | 2.48E+00    | macrophages | RNASE1       |
| CDH1          | 9.49E-229 | 1.325930629 | 0.34  | 0.026 | 5.82E-224 | 1.31E+01    | macrophages | CDH1         |
| VIM1          | 6.53E-101 | 1.324606416 | 0.879 | 0.448 | 4.01E-96  | 1.96E+00    | macrophages | VIM          |
| HLA-B1        | 1.04E-14  | 1.312680896 | 0.374 | 0.252 | 6.35E-10  | 1.48E+00    | macrophages | HLA-B        |
| RHOB1         | 2.17E-91  | 1.312235456 | 0.673 | 0.237 | 1.33E-86  | 2.84E+00    | macrophages | RHOB         |
| HCLS1         | 0         | 1.307447331 | 0.488 | 0.008 | 0         | 61          | macrophages | HCLS1        |
| EMP31         | 2.41E-106 | 1.295256119 | 0.572 | 0.16  | 1.48E-101 | 3.58E+00    | macrophages | EMP3         |
| KLF41         | 5.09E-61  | 1.293740014 | 0.747 | 0.485 | 3.12E-56  | 1.54E+00    | macrophages | KLF4         |
| LST1          | 0         | 1.290623757 | 0.441 | 0.009 | 0         | 49          | macrophages | LST1         |
| RPL101        | 5.21E-120 | 1.28489913  | 0.909 | 0.36  | 3.20E-115 | 2.53E+00    | macrophages | RPL10        |
| FCGR3A        | 0         | 1.279150227 | 0.377 | 0.001 | 0         | 377         | macrophages | FCGR3A       |
| RPL10P31      | 1.05E-148 | 1.278221674 | 0.391 | 0.052 | 6.41E-144 | 7.52E+00    | macrophages | RPL10P3      |
| HCST          | 0         | 1.271441825 | 0.451 | 0.014 | 0         | 32.21428571 | macrophages | HCST         |
| CSRNP11       | 7.34E-93  | 1.261188603 | 0.576 | 0.179 | 4.50E-88  | 3.22E+00    | macrophages | CSRNP1       |
| RNASET2       | 1.43E-107 | 1.2589285   | 0.519 | 0.132 | 8.80E-103 | 3.93E+00    | macrophages | RNASET2      |
| RP5.1052M9.11 | 4.27E-45  | 1.257838867 | 0.478 | 0.205 | 2.62E-40  | 2.33E+00    | macrophages | RP5.1052M9.1 |
| REL1          | 5.34E-124 | 1.255264715 | 0.508 | 0.11  | 3.27E-119 | 4.62E+00    | macrophages | REL          |
| B3GNT5        | 3.40E-72  | 1.248591621 | 0.418 | 0.118 | 2.08E-67  | 3.54E+00    | macrophages | B3GNT5       |
| ARHGDI1       | 2.12E-292 | 1.241598905 | 0.441 | 0.035 | 1.30E-287 | 1.26E+01    | macrophages | ARHGDI1      |

|               |           |             |       |       |           |             |             |               |
|---------------|-----------|-------------|-------|-------|-----------|-------------|-------------|---------------|
| MSR1          | 0         | 1.235968556 | 0.431 | 0.019 | 0         | 22.68421053 | macrophages | MSR1          |
| IL13RA1       | 1.01E-133 | 1.230880475 | 0.519 | 0.106 | 6.20E-129 | 4.90E+00    | macrophages | IL13RA1       |
| HLA.DMA       | 0         | 1.228475842 | 0.32  | 0.005 | 0         | 64          | macrophages | HLA.DMA       |
| GADD45B1      | 2.09E-146 | 1.224017416 | 0.744 | 0.187 | 1.28E-141 | 3.98E+00    | macrophages | GADD45B       |
| HSPA1B1       | 8.07E-40  | 1.223239002 | 0.451 | 0.193 | 4.95E-35  | 2.34E+00    | macrophages | HSPA1B        |
| MT.CYB1       | 3.90E-35  | 1.221395734 | 0.572 | 0.332 | 2.39E-30  | 1.72E+00    | macrophages | MT.CYB        |
| FOLR2         | 0         | 1.2137189   | 0.35  | 0.004 | 0         | 87.5        | macrophages | FOLR2         |
| TXNIP1        | 1.04E-77  | 1.212123425 | 0.549 | 0.171 | 6.37E-73  | 3.21E+00    | macrophages | TXNIP         |
| RPL231        | 3.94E-87  | 1.208457675 | 0.902 | 0.701 | 2.42E-82  | 1.29E+00    | macrophages | RPL23         |
| RPL391        | 1.92E-93  | 1.207891526 | 0.747 | 0.277 | 1.18E-88  | 2.70E+00    | macrophages | RPL39         |
| JUND1         | 2.09E-83  | 1.200498675 | 0.838 | 0.501 | 1.28E-78  | 1.67E+00    | macrophages | JUND          |
| TGFBI         | 0         | 1.200070857 | 0.397 | 0.011 | 0         | 36.09090909 | macrophages | TGFBI         |
| JUNB1         | 4.50E-91  | 1.195959706 | 0.798 | 0.345 | 2.76E-86  | 2.31E+00    | macrophages | JUNB          |
| LRRFIP11      | 1.25E-137 | 1.195598727 | 0.485 | 0.089 | 7.68E-133 | 5.45E+00    | macrophages | LRRFIP1       |
| IRS2          | 1.05E-52  | 1.192648196 | 0.448 | 0.169 | 6.44E-48  | 2.65E+00    | macrophages | IRS2          |
| HLA.DMB       | 0         | 1.187721201 | 0.286 | 0.001 | 0         | 286         | macrophages | HLA.DMB       |
| LINC00936     | 9.95E-195 | 1.186434555 | 0.38  | 0.039 | 6.10E-190 | 9.74E+00    | macrophages | LINC00936     |
| HLA-C1        | 1.06E-19  | 1.181879096 | 0.337 | 0.176 | 6.48E-15  | 1.91E+00    | macrophages | HLA-C         |
| RILPL21       | 1.50E-112 | 1.179874574 | 0.397 | 0.072 | 9.18E-108 | 5.51E+00    | macrophages | RILPL2        |
| CXCL1         | 1.41E-169 | 1.175899616 | 0.131 | 0.005 | 8.68E-165 | 2.62E+01    | macrophages | CXCL1         |
| NPC21         | 2.73E-58  | 1.172006432 | 0.721 | 0.443 | 1.67E-53  | 1.63E+00    | macrophages | NPC2          |
| CD69          | 0         | 1.159219656 | 0.306 | 0.006 | 0         | 51          | macrophages | CD69          |
| PFKFB3        | 5.42E-106 | 1.159028221 | 0.306 | 0.045 | 3.32E-101 | 6.80E+00    | macrophages | PFKFB3        |
| FCGRT1        | 1.24E-74  | 1.158606508 | 0.545 | 0.191 | 7.63E-70  | 2.85E+00    | macrophages | FCGRT         |
| AHNAK1        | 6.44E-95  | 1.154433345 | 0.586 | 0.168 | 3.95E-90  | 3.49E+00    | macrophages | AHNAK         |
| HLA-DQA2      | 0         | 1.153724242 | 0.276 | 0.004 | 0         | 69          | macrophages | HLA-DQA2      |
| CFLAR1        | 3.76E-54  | 1.151379353 | 0.556 | 0.263 | 2.31E-49  | 2.11E+00    | macrophages | CFLAR         |
| ZEB2          | 1.20E-139 | 1.146153985 | 0.458 | 0.078 | 7.38E-135 | 5.87E+00    | macrophages | ZEB2          |
| HLA-DMA1      | 4.12E-261 | 1.142501509 | 0.283 | 0.015 | 2.53E-256 | 1.89E+01    | macrophages | HLA-DMA       |
| MAF           | 2.71E-125 | 1.140666247 | 0.424 | 0.072 | 1.66E-120 | 5.89E+00    | macrophages | MAF           |
| MNDA          | 0         | 1.138192234 | 0.391 | 0.008 | 0         | 48.875      | macrophages | MNDA          |
| TRIB1         | 3.14E-247 | 1.130242553 | 0.34  | 0.024 | 1.92E-242 | 1.42E+01    | macrophages | TRIB1         |
| FYB           | 1.58E-141 | 1.124619129 | 0.414 | 0.064 | 9.68E-137 | 6.47E+00    | macrophages | FYB           |
| ARPC1B1       | 9.06E-137 | 1.123996042 | 0.444 | 0.074 | 5.56E-132 | 6.00E+00    | macrophages | ARPC1B        |
| PTGER4        | 7.49E-113 | 1.117167741 | 0.397 | 0.073 | 4.60E-108 | 5.44E+00    | macrophages | PTGER4        |
| KDM6B         | 2.97E-51  | 1.116676153 | 0.512 | 0.226 | 1.82E-46  | 2.27E+00    | macrophages | KDM6B         |
| VEGFA         | 1.42E-268 | 1.115361063 | 0.34  | 0.022 | 8.72E-264 | 1.55E+01    | macrophages | VEGFA         |
| MAP3K81       | 3.01E-291 | 1.114324377 | 0.391 | 0.027 | 1.85E-286 | 1.45E+01    | macrophages | MAP3K8        |
| CD37          | 3.34E-91  | 1.106878886 | 0.505 | 0.138 | 2.05E-86  | 3.66E+00    | macrophages | CD37          |
| ZFAND51       | 1.96E-28  | 1.098211777 | 0.63  | 0.485 | 1.20E-23  | 1.30E+00    | macrophages | ZFAND5        |
| HLA-E1        | 5.82E-57  | 1.094720724 | 0.333 | 0.086 | 3.57E-52  | 3.87E+00    | macrophages | HLA-E         |
| NFKB1         | 1.85E-104 | 1.094193086 | 0.391 | 0.074 | 1.13E-99  | 5.28E+00    | macrophages | NFKB1         |
| SOD21         | 1.42E-31  | 1.086753643 | 0.623 | 0.5   | 8.71E-27  | 1.25E+00    | macrophages | SOD2          |
| MSN1          | 4.79E-159 | 1.085204053 | 0.455 | 0.067 | 2.94E-154 | 6.79E+00    | macrophages | MSN           |
| RASGEF1B      | 0         | 1.085114794 | 0.384 | 0.017 | 0         | 22.58823529 | macrophages | RASGEF1B      |
| MBNL11        | 3.37E-102 | 1.084749967 | 0.458 | 0.101 | 2.07E-97  | 4.53E+00    | macrophages | MBNL1         |
| GRN1          | 5.57E-91  | 1.079813361 | 0.505 | 0.132 | 3.41E-86  | 3.83E+00    | macrophages | GRN           |
| DAB21         | 7.00E-97  | 1.076804717 | 0.313 | 0.049 | 4.29E-92  | 6.39E+00    | macrophages | DAB2          |
| LMNA1         | 7.34E-34  | 1.076404098 | 0.582 | 0.37  | 4.50E-29  | 1.57E+00    | macrophages | LMNA          |
| ELF11         | 5.22E-96  | 1.071064385 | 0.458 | 0.108 | 3.20E-91  | 4.24E+00    | macrophages | ELF1          |
| CH25H         | 0         | 1.069550119 | 0.209 | 0.005 | 0         | 41.8        | macrophages | CH25H         |
| IQGAP11       | 2.63E-64  | 1.067154355 | 0.492 | 0.17  | 1.61E-59  | 2.89E+00    | macrophages | IQGAP1        |
| CD4           | 6.77E-216 | 1.062656913 | 0.34  | 0.028 | 4.16E-211 | 1.21E+01    | macrophages | CD4           |
| PTMA2         | 5.03E-90  | 1.061424259 | 0.953 | 0.653 | 3.08E-85  | 1.46E+00    | macrophages | PTMA          |
| C1orf162      | 9.66E-91  | 1.05429294  | 0.418 | 0.096 | 5.92E-86  | 4.35E+00    | macrophages | C1orf162      |
| CHMP1B        | 4.13E-21  | 1.049897432 | 0.391 | 0.224 | 2.53E-16  | 1.75E+00    | macrophages | CHMP1B        |
| DUSP51        | 5.01E-74  | 1.04882617  | 0.38  | 0.091 | 3.07E-69  | 4.18E+00    | macrophages | DUSP5         |
| LYN           | 0         | 1.046890537 | 0.367 | 0.021 | 0         | 17.47619048 | macrophages | LYN           |
| CX3CR1        | 0         | 1.046613869 | 0.323 | 0.004 | 0         | 80.75       | macrophages | CX3CR1        |
| KCTD121       | 4.53E-119 | 1.04279207  | 0.455 | 0.085 | 2.78E-114 | 5.35E+00    | macrophages | KCTD12        |
| RNASE6        | 0         | 1.042400322 | 0.327 | 0.001 | 0         | 327         | macrophages | RNASE6        |
| COTL1         | 9.74E-88  | 1.036862638 | 0.387 | 0.083 | 5.97E-83  | 4.66E+00    | macrophages | COTL1         |
| MT.ND31       | 4.14E-30  | 1.033896358 | 0.576 | 0.368 | 2.54E-25  | 1.57E+00    | macrophages | MT.ND3        |
| MT.ND21       | 2.40E-27  | 1.033648193 | 0.572 | 0.383 | 1.47E-22  | 1.49E+00    | macrophages | MT.ND2        |
| BHLHE41       | 1.57E-98  | 1.022881543 | 0.269 | 0.037 | 9.65E-94  | 7.27E+00    | macrophages | BHLHE41       |
| STAB1         | 5.77E-255 | 1.022603988 | 0.273 | 0.015 | 3.54E-250 | 1.82E+01    | macrophages | STAB1         |
| RPL34P181     | 3.53E-31  | 1.022001268 | 0.421 | 0.205 | 2.17E-26  | 2.05E+00    | macrophages | RPL34P18      |
| FTH1P20       | 2.68E-96  | 1.017249901 | 0.276 | 0.04  | 1.64E-91  | 6.90E+00    | macrophages | FTH1P20       |
| RP11.475C16.1 | 9.68E-28  | 1.010966217 | 0.384 | 0.186 | 5.94E-23  | 2.06E+00    | macrophages | RP11.475C16.1 |
| C10orf54      | 8.50E-269 | 1.010034347 | 0.337 | 0.021 | 5.22E-264 | 1.60E+01    | macrophages | C10orf54      |
| PTPRE         | 0         | 1.008611499 | 0.354 | 0.018 | 0         | 19.66666667 | macrophages | PTPRE         |
| IL10RA        | 0         | 1.001586335 | 0.35  | 0.002 | 0         | 175         | macrophages | IL10RA        |
| TPSB2         | 7.87E-60  | 3.477935867 | 0.34  | 0.02  | 4.83E-55  | 1.70E+01    | mastocyte   | TPSB2         |
| TPSAB1        | 0         | 2.561304711 | 0.3   | 0.002 | 0         | 150         | mastocyte   | TPSAB1        |
| CD691         | 7.98E-38  | 2.357795113 | 0.18  | 0.009 | 4.90E-33  | 2.00E+01    | mastocyte   | CD69          |

|           |             |             |       |       |           |             |           |          |
|-----------|-------------|-------------|-------|-------|-----------|-------------|-----------|----------|
| ANXA14    | 0.005486279 | 1.668256773 | 0.18  | 0.083 | 1         | 2.168674699 | mastocyte | ANXA1    |
| CPA3      | 0           | 1.451265788 | 0.24  | 0.001 | 0         | 240         | mastocyte | CPA3     |
| CTSG      | 1.27E-16    | 1.380507768 | 0.2   | 0.024 | 7.78E-12  | 8.33E+00    | mastocyte | CTSG     |
| MS4A2     | 1.02E-90    | 1.078382808 | 0.18  | 0.004 | 6.24E-86  | 4.50E+01    | mastocyte | MS4A2    |
| PTGDS1    | 0           | 2.844915854 | 0.979 | 0.664 | 0         | 1.47439759  | PTM_cells | PTGDS    |
| ACTA2     | 0           | 2.784577725 | 0.912 | 0.149 | 0         | 6.120805369 | PTM_cells | ACTA2    |
| IGFBP72   | 0           | 2.623014649 | 0.957 | 0.253 | 0         | 3.782608696 | PTM_cells | IGFBP7   |
| APOE1     | 0           | 2.44562663  | 0.795 | 0.159 | 0         | 5           | PTM_cells | APOE     |
| MYH11     | 0           | 2.388047245 | 0.894 | 0.161 | 0         | 5.552795031 | PTM_cells | MYH11    |
| TMSB4X3   | 0           | 2.229472121 | 0.946 | 0.307 | 0         | 3.081433225 | PTM_cells | TMSB4X   |
| FHL21     | 0           | 2.204024482 | 0.816 | 0.079 | 0         | 10.32911392 | PTM_cells | FHL2     |
| MYL9      | 0           | 2.197610697 | 0.85  | 0.128 | 0         | 6.640625    | PTM_cells | MYL9     |
| TPM2      | 0           | 2.160595245 | 0.846 | 0.115 | 0         | 7.356521739 | PTM_cells | TPM2     |
| ENG2      | 0           | 2.132021529 | 0.848 | 0.072 | 0         | 11.77777778 | PTM_cells | ENG      |
| TIMP32    | 0           | 2.040137855 | 0.861 | 0.142 | 0         | 6.063380282 | PTM_cells | TIMP3    |
| TAGLN     | 0           | 1.97718524  | 0.816 | 0.109 | 0         | 7.486238532 | PTM_cells | TAGLN    |
| TIMP12    | 0           | 1.925981891 | 0.816 | 0.135 | 0         | 6.044444444 | PTM_cells | TIMP1    |
| AEBP11    | 0           | 1.919894138 | 0.806 | 0.058 | 0         | 13.89655172 | PTM_cells | AEBP1    |
| O3-Jun    | 0           | 1.882398457 | 0.853 | 0.346 | 0         | 2.465317919 | PTM_cells | JUN      |
| KRT17     | 0           | 1.882168871 | 0.448 | 0.008 | 0         | 56          | PTM_cells | KRT17    |
| SPARCL12  | 0           | 1.881156274 | 0.893 | 0.13  | 0         | 6.869230769 | PTM_cells | SPARCL1  |
| SMOC21    | 0           | 1.832348459 | 0.797 | 0.053 | 0         | 15.03773585 | PTM_cells | SMOC2    |
| MALAT13   | 5.19E-267   | 1.821771164 | 0.916 | 0.834 | 3.18E-262 | 1.10E+00    | PTM_cells | MALAT1   |
| DPEP11    | 0           | 1.81505935  | 0.757 | 0.14  | 0         | 5.407142857 | PTM_cells | DPEP1    |
| CALD11    | 0           | 1.809779788 | 0.874 | 0.206 | 0         | 4.242718447 | PTM_cells | CALD1    |
| BGN       | 0           | 1.771590992 | 0.749 | 0.058 | 0         | 12.9137931  | PTM_cells | BGN      |
| SPARC2    | 0           | 1.756558311 | 0.875 | 0.217 | 0         | 4.032258065 | PTM_cells | SPARC    |
| TCEAL41   | 0           | 1.749241869 | 0.807 | 0.161 | 0         | 5.01242236  | PTM_cells | TCEAL4   |
| NEAT13    | 0           | 1.725348958 | 0.65  | 0.174 | 0         | 3.735632184 | PTM_cells | NEAT1    |
| NR2F22    | 0           | 1.720345429 | 0.794 | 0.137 | 0         | 5.795620438 | PTM_cells | NR2F2    |
| RPL103    | 0           | 1.691891036 | 0.926 | 0.337 | 0         | 2.747774481 | PTM_cells | RPL10    |
| MEG31     | 0           | 1.679783919 | 0.607 | 0.161 | 0         | 3.770186335 | PTM_cells | MEG3     |
| FOS3      | 0           | 1.663146346 | 0.856 | 0.285 | 0         | 3.003508772 | PTM_cells | FOS      |
| OSR21     | 0           | 1.65191603  | 0.753 | 0.082 | 0         | 9.182926829 | PTM_cells | OSR2     |
| C11orf961 | 0           | 1.650661529 | 0.778 | 0.251 | 0         | 3.099601594 | PTM_cells | C11orf96 |
| MYLK      | 0           | 1.632184269 | 0.761 | 0.168 | 0         | 4.529761905 | PTM_cells | MYLK     |
| LGALS11   | 0           | 1.628234752 | 0.821 | 0.177 | 0         | 4.638418079 | PTM_cells | LGALS1   |
| TPM1      | 0           | 1.626326199 | 0.788 | 0.177 | 0         | 4.451977401 | PTM_cells | TPM1     |
| MYL62     | 0           | 1.607100452 | 0.928 | 0.651 | 0         | 1.425499232 | PTM_cells | MYL6     |
| JUNB3     | 0           | 1.587374251 | 0.842 | 0.324 | 0         | 2.598765432 | PTM_cells | JUNB     |
| MGP2      | 0           | 1.577268781 | 0.859 | 0.133 | 0         | 6.458646617 | PTM_cells | MGP      |
| ITM2B3    | 0           | 1.553774535 | 0.864 | 0.299 | 0         | 2.889632107 | PTM_cells | ITM2B    |
| COL15A12  | 0           | 1.534470703 | 0.738 | 0.099 | 0         | 7.454545455 | PTM_cells | COL15A1  |
| TIMP21    | 0           | 1.50552163  | 0.847 | 0.402 | 0         | 2.106965174 | PTM_cells | TIMP2    |
| CYR611    | 0           | 1.494852645 | 0.66  | 0.089 | 0         | 7.415730337 | PTM_cells | CYR61    |
| TNS11     | 0           | 1.489337695 | 0.732 | 0.074 | 0         | 9.891891892 | PTM_cells | TNS1     |
| FTL3      | 0           | 1.488618109 | 0.905 | 0.509 | 0         | 1.777996071 | PTM_cells | FTL      |
| MMP21     | 0           | 1.477476529 | 0.747 | 0.154 | 0         | 4.850649351 | PTM_cells | MMP2     |
| FOSB3     | 0           | 1.472847267 | 0.782 | 0.321 | 0         | 2.436137072 | PTM_cells | FOSB     |
| PTMS2     | 0           | 1.466560039 | 0.795 | 0.185 | 0         | 4.297297297 | PTM_cells | PTMS     |
| RPS4X3    | 0           | 1.46348975  | 0.898 | 0.321 | 0         | 2.797507788 | PTM_cells | RPS4X    |
| FBLN51    | 0           | 1.451601023 | 0.708 | 0.065 | 0         | 10.89230769 | PTM_cells | FBLN5    |
| TSHZ21    | 0           | 1.438153166 | 0.699 | 0.079 | 0         | 8.848101266 | PTM_cells | TSHZ2    |
| MFAP4     | 0           | 1.435472167 | 0.63  | 0.026 | 0         | 24.23076923 | PTM_cells | MFAP4    |
| CD633     | 0           | 1.422326647 | 0.847 | 0.264 | 0         | 3.208333333 | PTM_cells | CD63     |
| LAMC31    | 0           | 1.417035348 | 0.684 | 0.043 | 0         | 15.90697674 | PTM_cells | LAMC3    |
| APOD1     | 0           | 1.416653808 | 0.667 | 0.062 | 0         | 10.75806452 | PTM_cells | APOD     |
| CPE1      | 0           | 1.387968129 | 0.777 | 0.185 | 0         | 4.2         | PTM_cells | CPE      |
| ACTB3     | 0           | 1.387559715 | 0.907 | 0.57  | 0         | 1.59122807  | PTM_cells | ACTB     |
| MAGED21   | 0           | 1.383574062 | 0.74  | 0.11  | 0         | 6.727272727 | PTM_cells | MAGED2   |
| EGR13     | 0           | 1.383257295 | 0.743 | 0.239 | 0         | 3.108786611 | PTM_cells | EGR1     |
| RPL13A3   | 0           | 1.375600855 | 0.939 | 0.727 | 0         | 1.291609354 | PTM_cells | RPL13A   |
| KRT131    | 0           | 1.370775087 | 0.447 | 0.045 | 0         | 9.933333333 | PTM_cells | KRT13    |
| BST23     | 0           | 1.357673225 | 0.73  | 0.083 | 0         | 8.795180723 | PTM_cells | BST2     |
| IGFBP61   | 0           | 1.339127437 | 0.632 | 0.07  | 0         | 9.028571429 | PTM_cells | IGFBP6   |
| ITGB11    | 0           | 1.331735709 | 0.788 | 0.187 | 0         | 4.213903743 | PTM_cells | ITGB1    |
| NUPR11    | 0           | 1.330807205 | 0.724 | 0.109 | 0         | 6.642201835 | PTM_cells | NUPR1    |
| TPM42     | 0           | 1.311770479 | 0.725 | 0.213 | 0         | 3.403755869 | PTM_cells | TPM4     |
| MT-ND52   | 0           | 1.310106634 | 0.735 | 0.275 | 0         | 2.672727273 | PTM_cells | MT-ND5   |
| IER23     | 0           | 1.300509018 | 0.664 | 0.155 | 0         | 4.283870968 | PTM_cells | IER2     |
| ZFP36L13  | 0           | 1.288427536 | 0.805 | 0.377 | 0         | 2.135278515 | PTM_cells | ZFP36L1  |
| RPS83     | 0           | 1.285029456 | 0.928 | 0.768 | 0         | 1.208333333 | PTM_cells | RPS8     |
| RASD1     | 0           | 1.279059136 | 0.591 | 0.045 | 0         | 13.13333333 | PTM_cells | RASD1    |
| RPL10A3   | 0           | 1.274242792 | 0.902 | 0.651 | 0         | 1.385560676 | PTM_cells | RPL10A   |
| F3        | 0           | 1.273254602 | 0.637 | 0.052 | 0         | 12.25       | PTM_cells | F3       |

|           |           |             |       |       |           |             |           |          |
|-----------|-----------|-------------|-------|-------|-----------|-------------|-----------|----------|
| VCAN1     | 0         | 1.268032218 | 0.595 | 0.046 | 0         | 12.93478261 | PTM_cells | VCAN     |
| SFRP41    | 0         | 1.261199306 | 0.58  | 0.027 | 0         | 21.48148148 | PTM_cells | SFRP4    |
| LTBP41    | 0         | 1.246337763 | 0.778 | 0.129 | 0         | 6.031007752 | PTM_cells | LTBP4    |
| ABLIM11   | 0         | 1.243445053 | 0.716 | 0.265 | 0         | 2.701886792 | PTM_cells | ABLIM1   |
| EEF1A13   | 0         | 1.237807136 | 0.978 | 0.922 | 0         | 1.060737527 | PTM_cells | EEF1A1   |
| COL1A11   | 0         | 1.236660109 | 0.701 | 0.102 | 0         | 6.87254902  | PTM_cells | COL1A1   |
| FLNA1     | 0         | 1.225571219 | 0.733 | 0.088 | 0         | 8.329545455 | PTM_cells | FLNA     |
| MT-CYB3   | 1.43E-296 | 1.221267892 | 0.786 | 0.378 | 8.77E-292 | 2.08E+00    | PTM_cells | MT-CYB   |
| GADD45B3  | 0         | 1.21634598  | 0.716 | 0.166 | 0         | 4.313253012 | PTM_cells | GADD45B  |
| MT-ATP63  | 4.01E-266 | 1.215399622 | 0.789 | 0.417 | 2.46E-261 | 1.89E+00    | PTM_cells | MT-ATP6  |
| RPL123    | 0         | 1.211985459 | 0.881 | 0.623 | 0         | 1.414125201 | PTM_cells | RPL12    |
| IFITM33   | 0         | 1.205168587 | 0.811 | 0.166 | 0         | 4.885542169 | PTM_cells | IFITM3   |
| GSTP13    | 0         | 1.200474621 | 0.738 | 0.145 | 0         | 5.089655172 | PTM_cells | GSTP1    |
| DPYSL31   | 0         | 1.193359995 | 0.625 | 0.092 | 0         | 6.793478261 | PTM_cells | DPYSL3   |
| HSPB12    | 0         | 1.190156823 | 0.722 | 0.196 | 0         | 3.683673469 | PTM_cells | HSPB1    |
| ZFP36L23  | 0         | 1.190114711 | 0.682 | 0.121 | 0         | 5.636363636 | PTM_cells | ZFP36L2  |
| COL1A21   | 0         | 1.189935716 | 0.76  | 0.153 | 0         | 4.967320261 | PTM_cells | COL1A2   |
| PEMT      | 0         | 1.187249853 | 0.61  | 0.082 | 0         | 7.43902439  | PTM_cells | PEMT     |
| COL6A21   | 0         | 1.183977619 | 0.739 | 0.093 | 0         | 7.946236559 | PTM_cells | COL6A2   |
| RPL183    | 0         | 1.174511111 | 0.881 | 0.558 | 0         | 1.578853047 | PTM_cells | RPL18    |
| RPL393    | 0         | 1.172845435 | 0.794 | 0.256 | 0         | 3.1015625   | PTM_cells | RPL39    |
| GSN3      | 0         | 1.167628153 | 0.75  | 0.188 | 0         | 3.989361702 | PTM_cells | GSN      |
| PLAC91    | 0         | 1.163432819 | 0.606 | 0.061 | 0         | 9.93442623  | PTM_cells | PLAC9    |
| IGFBP21   | 0         | 1.16320792  | 0.538 | 0.115 | 0         | 4.67826087  | PTM_cells | IGFBP2   |
| SPTBN12   | 0         | 1.158599439 | 0.764 | 0.281 | 0         | 2.71886121  | PTM_cells | SPTBN1   |
| CTGF1     | 0         | 1.155092412 | 0.483 | 0.051 | 0         | 9.470588235 | PTM_cells | CTGF     |
| RPL214    | 0         | 1.153922848 | 0.912 | 0.455 | 0         | 2.004395604 | PTM_cells | RPL21    |
| SSPN1     | 0         | 1.146466351 | 0.653 | 0.069 | 0         | 9.463768116 | PTM_cells | SSPN     |
| VIM3      | 0         | 1.145861632 | 0.912 | 0.429 | 0         | 2.125874126 | PTM_cells | VIM      |
| RPLP13    | 0         | 1.143913491 | 0.948 | 0.757 | 0         | 1.252311757 | PTM_cells | RPLP1    |
| NGFRAP11  | 0         | 1.143372496 | 0.617 | 0.115 | 0         | 5.365217391 | PTM_cells | NGFRAP1  |
| DCN1      | 0         | 1.142679619 | 0.842 | 0.121 | 0         | 6.958677686 | PTM_cells | DCN      |
| RHOB3     | 0         | 1.13366186  | 0.724 | 0.217 | 0         | 3.33640553  | PTM_cells | RHOB     |
| RPL18A4   | 0         | 1.130735533 | 0.85  | 0.396 | 0         | 2.146464646 | PTM_cells | RPL18A   |
| NR4A12    | 2.27E-301 | 1.126275614 | 0.634 | 0.242 | 1.39E-296 | 2.62E+00    | PTM_cells | NR4A1    |
| ZFP363    | 0         | 1.125799009 | 0.75  | 0.218 | 0         | 3.440366972 | PTM_cells | ZFP36    |
| PRDX22    | 0         | 1.123196057 | 0.646 | 0.083 | 0         | 7.78313253  | PTM_cells | PRDX2    |
| B2M3      | 0         | 1.12120889  | 0.888 | 0.22  | 0         | 4.036363636 | PTM_cells | B2M      |
| RPL413    | 0         | 1.114402186 | 0.93  | 0.78  | 0         | 1.192307692 | PTM_cells | RPL41    |
| CSRP1     | 0         | 1.112255012 | 0.613 | 0.092 | 0         | 6.663043478 | PTM_cells | CSRP1    |
| RPL63     | 0         | 1.108946256 | 0.891 | 0.673 | 0         | 1.323922734 | PTM_cells | RPL6     |
| EID12     | 0         | 1.105594623 | 0.78  | 0.345 | 0         | 2.260869565 | PTM_cells | EID1     |
| S100A63   | 0         | 1.104436364 | 0.691 | 0.105 | 0         | 6.580952381 | PTM_cells | S100A6   |
| PRPS21    | 0         | 1.103260502 | 0.609 | 0.071 | 0         | 8.577464789 | PTM_cells | PRPS2    |
| PPIB1     | 0         | 1.100648308 | 0.695 | 0.273 | 0         | 2.545787546 | PTM_cells | PPIB     |
| DUSP13    | 0         | 1.093369603 | 0.671 | 0.161 | 0         | 4.167701863 | PTM_cells | DUSP1    |
| C1S1      | 0         | 1.093098148 | 0.681 | 0.076 | 0         | 8.960526316 | PTM_cells | C1S      |
| CRISPLD21 | 0         | 1.092630202 | 0.612 | 0.1   | 0         | 6.12        | PTM_cells | CRISPLD2 |
| SERPINF11 | 0         | 1.089352973 | 0.698 | 0.122 | 0         | 5.721311475 | PTM_cells | SERPINF1 |
| NEXN      | 0         | 1.086496872 | 0.584 | 0.09  | 0         | 6.488888889 | PTM_cells | NEXN     |
| COL3A11   | 0         | 1.076415256 | 0.637 | 0.151 | 0         | 4.218543046 | PTM_cells | COL3A1   |
| MT-ND43   | 7.73E-266 | 1.073596272 | 0.788 | 0.4   | 4.74E-261 | 1.97E+00    | PTM_cells | MT-ND4   |
| CAV12     | 0         | 1.072208093 | 0.671 | 0.077 | 0         | 8.714285714 | PTM_cells | CAV1     |
| NDUFA4    | 4.82E-267 | 1.067132426 | 0.787 | 0.513 | 2.95E-262 | 1.53E+00    | PTM_cells | NDUFA4   |
| KANK21    | 0         | 1.061919045 | 0.591 | 0.053 | 0         | 11.1509434  | PTM_cells | KANK2    |
| CD992     | 0         | 1.059604266 | 0.742 | 0.169 | 0         | 4.390532544 | PTM_cells | CD99     |
| AHNAK3    | 0         | 1.059266749 | 0.696 | 0.145 | 0         | 4.8         | PTM_cells | AHNAK    |
| PTCH11    | 0         | 1.059134645 | 0.601 | 0.175 | 0         | 3.434285714 | PTM_cells | PTCH1    |
| OGN1      | 0         | 1.057936178 | 0.607 | 0.052 | 0         | 11.67307692 | PTM_cells | OGN      |
| CST32     | 0         | 1.056127669 | 0.859 | 0.41  | 0         | 2.095121951 | PTM_cells | CST3     |
| MORF4L21  | 0         | 1.056018973 | 0.696 | 0.3   | 0         | 2.32        | PTM_cells | MORF4L2  |
| PTRF2     | 0         | 1.055697097 | 0.671 | 0.092 | 0         | 7.293478261 | PTM_cells | PTRF     |
| LGALS3BP1 | 0         | 1.042971349 | 0.663 | 0.091 | 0         | 7.285714286 | PTM_cells | LGALS3BP |
| FXYD61    | 0         | 1.04226348  | 0.647 | 0.087 | 0         | 7.436781609 | PTM_cells | FXYD6    |
| BTG23     | 0         | 1.042177003 | 0.581 | 0.11  | 0         | 5.281818182 | PTM_cells | BTG2     |
| KLF23     | 0         | 1.039536757 | 0.622 | 0.145 | 0         | 4.289655172 | PTM_cells | KLF2     |
| PLPP31    | 0         | 1.037803952 | 0.671 | 0.095 | 0         | 7.063157895 | PTM_cells | PLPP3    |
| IFI63     | 0         | 1.036257666 | 0.609 | 0.071 | 0         | 8.577464789 | PTM_cells | IFI6     |
| CD812     | 0         | 1.035122196 | 0.706 | 0.298 | 0         | 2.369127517 | PTM_cells | CD81     |
| NUCKS12   | 8.03E-301 | 1.031307733 | 0.741 | 0.385 | 4.93E-296 | 1.92E+00    | PTM_cells | NUCKS1   |
| DSTN      | 0         | 1.026075228 | 0.84  | 0.547 | 0         | 1.535648995 | PTM_cells | DSTN     |
| NPTX2     | 0         | 1.022276962 | 0.564 | 0.109 | 0         | 5.174311927 | PTM_cells | NPTX2    |
| PPP1R14A1 | 0         | 1.019924142 | 0.634 | 0.127 | 0         | 4.992125984 | PTM_cells | PPP1R14A |
| CCNL13    | 4.77E-201 | 1.013492155 | 0.627 | 0.333 | 2.92E-196 | 1.88E+00    | PTM_cells | CCNL1    |
| PPP1R15A3 | 0         | 1.012865435 | 0.674 | 0.173 | 0         | 3.895953757 | PTM_cells | PPP1R15A |

|           |           |             |       |       |             |             |               |           |
|-----------|-----------|-------------|-------|-------|-------------|-------------|---------------|-----------|
| NBL11     | 0         | 1.010804278 | 0.622 | 0.073 | 0           | 8.520547945 | PTM_cells     | NBL1      |
| GNB2L12   | 1.73E-214 | 1.007792381 | 0.712 | 0.459 | 1.06E-209   | 1.55E+00    | PTM_cells     | GNB2L1    |
| LAMB11    | 0         | 1.005567139 | 0.536 | 0.065 | 0           | 8.246153846 | PTM_cells     | LAMB1     |
| LDHB1     | 0         | 1.005334421 | 0.688 | 0.198 | 0           | 3.474747475 | PTM_cells     | LDHB      |
| SMOC1     | 0         | 1.00085494  | 0.543 | 0.057 | 0           | 9.526315789 | PTM_cells     | SMOC1     |
| RNASE12   | 0         | 2.660771869 | 0.733 | 0.101 | 0           | 7.257425743 | Sertoli_cells | RNASE1    |
| APOA1     | 0         | 2.644927727 | 0.742 | 0.108 | 0           | 6.87037037  | Sertoli_cells | APOA1     |
| FATE1     | 0         | 2.547521129 | 0.81  | 0.068 | 0           | 11.91176471 | Sertoli_cells | FATE1     |
| DEFB119   | 0         | 2.498591255 | 0.761 | 0.117 | 0           | 6.504273504 | Sertoli_cells | DEFB119   |
| CLU1      | 3.66E-303 | 2.498270374 | 0.746 | 0.657 | 2.25E-298   | 1.14E+00    | Sertoli_cells | CLU       |
| TMSB104   | 0         | 2.468101568 | 0.913 | 0.363 | 0           | 2.515151515 | Sertoli_cells | TMSB10    |
| CITED1    | 0         | 2.439601543 | 0.786 | 0.066 | 0           | 11.90909091 | Sertoli_cells | CITED1    |
| MIR202HG  | 0         | 2.322044523 | 0.701 | 0.05  | 0           | 14.02       | Sertoli_cells | MIR202HG  |
| MT.RNR11  | 3.55E-43  | 2.321435368 | 0.346 | 0.279 | 2.18E-38    | 1.24E+00    | Sertoli_cells | MT.RNR1   |
| HMGNS     | 0         | 2.212928893 | 0.702 | 0.052 | 0           | 13.5        | Sertoli_cells | HMGNS     |
| COPE      | 0         | 1.883784461 | 0.839 | 0.567 | 0           | 1.479717813 | Sertoli_cells | COPE      |
| EPPIN     | 0         | 1.848749457 | 0.588 | 0.039 | 0           | 15.07692308 | Sertoli_cells | EPPIN     |
| GSTA1     | 0         | 1.840676848 | 0.652 | 0.061 | 0           | 10.68852459 | Sertoli_cells | GSTA1     |
| MT.RNR22  | 1.60E-14  | 1.813507951 | 0.351 | 0.375 | 9.79E-10    | 9.36E-01    | Sertoli_cells | MT.RNR2   |
| SERPINA5  | 0         | 1.764638177 | 0.56  | 0.17  | 0           | 3.294117647 | Sertoli_cells | SERPINA5  |
| BEX1      | 0         | 1.757474279 | 0.59  | 0.053 | 0           | 11.13207547 | Sertoli_cells | BEX1      |
| SCRG1     | 0         | 1.75498241  | 0.507 | 0.065 | 0           | 7.8         | Sertoli_cells | SCRG1     |
| CST33     | 0         | 1.751189061 | 0.753 | 0.41  | 0           | 1.836585366 | Sertoli_cells | CST3      |
| DEFB123   | 0         | 1.738069001 | 0.527 | 0.023 | 0           | 22.91304348 | Sertoli_cells | DEFB123   |
| ALDH1A11  | 0         | 1.702596773 | 0.629 | 0.096 | 0           | 6.552083333 | Sertoli_cells | ALDH1A1   |
| CLDN11    | 0         | 1.700853586 | 0.5   | 0.067 | 0           | 7.462686567 | Sertoli_cells | CLDN11    |
| TCEAL5    | 0         | 1.698754185 | 0.576 | 0.036 | 0           | 16          | Sertoli_cells | TCEAL5    |
| ISYNA1    | 2.21E-303 | 1.621428085 | 0.661 | 0.434 | 1.36E-298   | 1.52E+00    | Sertoli_cells | ISYNA1    |
| MT.ND32   | 4.08E-14  | 1.581382315 | 0.35  | 0.372 | 2.50E-09    | 9.41E-01    | Sertoli_cells | MT.ND3    |
| CST9L     | 0         | 1.544770258 | 0.46  | 0.017 | 0           | 27.05882353 | Sertoli_cells | CST9L     |
| HMGNS     | 0         | 1.533685687 | 0.614 | 0.243 | 0           | 2.526748971 | Sertoli_cells | HMGNS     |
| MGST33    | 0         | 1.51625884  | 0.651 | 0.211 | 0           | 3.085308057 | Sertoli_cells | MGST3     |
| MARCKSL12 | 0         | 1.5073979   | 0.654 | 0.196 | 0           | 3.336734694 | Sertoli_cells | MARCKSL1  |
| PEG10     | 0         | 1.490407065 | 0.529 | 0.101 | 0           | 5.237623762 | Sertoli_cells | PEG10     |
| MT.CO32   | 2.32E-22  | 1.488920089 | 0.349 | 0.327 | 1.42E-17    | 1.07E+00    | Sertoli_cells | MT.CO3    |
| NGFRAP12  | 1.15E-280 | 1.485560125 | 0.399 | 0.122 | 7.03E-276   | 3.27E+00    | Sertoli_cells | NGFRAP1   |
| HOPX      | 0         | 1.451890941 | 0.484 | 0.084 | 0           | 5.761904762 | Sertoli_cells | HOPX      |
| SAT12     | 0         | 1.451107325 | 0.61  | 0.126 | 0           | 4.841269841 | Sertoli_cells | SAT1      |
| MTND1P232 | 2.43E-12  | 1.439525281 | 0.349 | 0.376 | 1.49E-07    | 9.28E-01    | Sertoli_cells | MTND1P23  |
| SPARC4    | 9.95E-260 | 1.436070644 | 0.524 | 0.23  | 6.10E-255   | 2.28E+00    | Sertoli_cells | SPARC     |
| LINC00684 | 0         | 1.415452186 | 0.386 | 0.015 | 0           | 25.73333333 | Sertoli_cells | LINC00684 |
| MT.CO22   | 2.50E-20  | 1.410658165 | 0.349 | 0.335 | 1.53E-15    | 1.04E+00    | Sertoli_cells | MT.CO2    |
| PRND      | 0         | 1.396905497 | 0.417 | 0.017 | 0           | 24.52941176 | Sertoli_cells | PRND      |
| MTCO1P121 | 3.54E-72  | 1.370483263 | 0.345 | 0.212 | 2.17E-67    | 1.63E+00    | Sertoli_cells | MTCO1P12  |
| CALM13    | 0         | 1.359704812 | 0.829 | 0.684 | 0           | 1.211988304 | Sertoli_cells | CALM1     |
| ACTB5     | 2.36E-299 | 1.35488999  | 0.765 | 0.575 | 1.45E-294   | 1.33E+00    | Sertoli_cells | ACTB      |
| PPP1R14A3 | 0         | 1.325597017 | 0.518 | 0.127 | 0           | 4.078740157 | Sertoli_cells | PPP1R14A  |
| DCXR      | 0         | 1.325108304 | 0.499 | 0.104 | 0           | 4.798076923 | Sertoli_cells | DCXR      |
| TUBB4A    | 0         | 1.320673713 | 0.402 | 0.037 | 0           | 10.86486486 | Sertoli_cells | TUBB4A    |
| MYL6B     | 2.15E-296 | 1.304155256 | 0.742 | 0.594 | 1.32E-291   | 1.25E+00    | Sertoli_cells | MYL6B     |
| LGALS13   | 0         | 1.291021299 | 0.63  | 0.18  | 0           | 3.5         | Sertoli_cells | LGALS1    |
| CHGA      | 0         | 1.287143666 | 0.397 | 0.056 | 0           | 7.089285714 | Sertoli_cells | CHGA      |
| SMIM1     | 0         | 1.275539573 | 0.426 | 0.069 | 0           | 6.173913043 | Sertoli_cells | SMIM1     |
| SOX9      | 0         | 1.263175205 | 0.446 | 0.09  | 0           | 4.955555556 | Sertoli_cells | SOX9      |
| RPL395    | 0         | 1.260021219 | 0.694 | 0.254 | 0           | 2.732283465 | Sertoli_cells | RPL39     |
| SUSD3     | 0         | 1.257274357 | 0.407 | 0.021 | 0           | 19.38095238 | Sertoli_cells | SUSD3     |
| MT.TM     | 1.47E-266 | 1.243438174 | 0.282 | 0.062 | 9.00E-262   | 4.55E+00    | Sertoli_cells | MT.TM     |
| NUPR13    | 0         | 1.226627096 | 0.479 | 0.116 | 0           | 4.129310345 | Sertoli_cells | NUPR1     |
| RBP1      | 0         | 1.207582108 | 0.388 | 0.036 | 0           | 10.77777778 | Sertoli_cells | RBP1      |
| TAGLN23   | 0         | 1.200322266 | 0.521 | 0.192 | 0           | 2.713541667 | Sertoli_cells | TAGLN2    |
| BEX2      | 0         | 1.199662392 | 0.401 | 0.053 | 0           | 7.566037736 | Sertoli_cells | BEX2      |
| HPRT11    | 0         | 1.191150444 | 0.509 | 0.141 | 0           | 3.609929078 | Sertoli_cells | HPRT1     |
| FDXR      | 0         | 1.187755739 | 0.43  | 0.088 | 0           | 4.886363636 | Sertoli_cells | FDXR      |
| TCEAL2    | 0         | 1.186787409 | 0.396 | 0.034 | 0           | 11.64705882 | Sertoli_cells | TCEAL2    |
| MT-ND15   | 5.82E-41  | 1.182833515 | 0.488 | 0.406 | 3.57E-36    | 1.20E+00    | Sertoli_cells | MT-ND1    |
| 06-Sep    | 0         | 1.18091148  | 0.414 | 0.054 | 0           | 7.666666667 | Sertoli_cells | 06-Sep    |
| CCDC28B   | 0         | 1.171229551 | 0.4   | 0.07  | 0           | 5.714285714 | Sertoli_cells | CCDC28B   |
| PRDX6     | 2.40E-276 | 1.169927424 | 0.744 | 0.625 | 1.47E-271   | 1.19E+00    | Sertoli_cells | PRDX6     |
| SYNE22    | 4.83E-292 | 1.156232484 | 0.401 | 0.117 | 2.96E-287   | 3.43E+00    | Sertoli_cells | SYNE2     |
| AARD      | 6.23E-265 | 1.152473007 | 0.475 | 0.186 | 3.82E-260   | 2.55E+00    | Sertoli_cells | AARD      |
| SLC25A41  | 1.02E-204 | 1.144310993 | 0.436 | 0.191 | 6.25E-200   | 2.28E+00    | Sertoli_cells | SLC25A4   |
| RPL415    | 0         | 1.137756244 | 0.895 | 0.78  | 0           | 1.147435897 | Sertoli_cells | RPL41     |
| SMARCA11  | 0         | 1.130729821 | 0.455 | 0.116 | 0           | 3.922413793 | Sertoli_cells | SMARCA1   |
| MT.ND12   | 8.36E-09  | 1.130242518 | 0.351 | 0.381 | 0.000512786 | 0.921259843 | Sertoli_cells | MT.ND1    |
| GSTA2     | 0         | 1.12712618  | 0.352 | 0.014 | 0           | 25.14285714 | Sertoli_cells | GSTA2     |

|            |           |             |       |       |           |             |               |            |
|------------|-----------|-------------|-------|-------|-----------|-------------|---------------|------------|
| GMPR       | 0         | 1.115784926 | 0.399 | 0.096 | 0         | 4.15625     | Sertoli_cells | GMPR       |
| MT.CO12    | 6.59E-15  | 1.107295219 | 0.35  | 0.339 | 4.04E-10  | 1.03E+00    | Sertoli_cells | MT.CO1     |
| 14-Sep     | 0         | 1.0985805   | 0.374 | 0.016 | 0         | 23.375      | Sertoli_cells | 14-Sep     |
| EGR15      | 3.04E-68  | 1.090456843 | 0.386 | 0.255 | 1.87E-63  | 1.51E+00    | Sertoli_cells | EGR1       |
| SDC4       | 0         | 1.081637305 | 0.337 | 0.021 | 0         | 16.04761905 | Sertoli_cells | SDC4       |
| KIAA1210   | 0         | 1.081445973 | 0.36  | 0.018 | 0         | 20          | Sertoli_cells | KIAA1210   |
| MAP1B3     | 7.07E-241 | 1.076764263 | 0.416 | 0.146 | 4.34E-236 | 2.85E+00    | Sertoli_cells | MAP1B      |
| HSPA1A5    | 3.51E-19  | 1.074970248 | 0.369 | 0.363 | 2.15E-14  | 1.02E+00    | Sertoli_cells | HSPA1A     |
| SMIM10     | 0         | 1.067626117 | 0.372 | 0.048 | 0         | 7.75        | Sertoli_cells | SMIM10     |
| C4orf48    | 1.55E-31  | 1.058981249 | 0.327 | 0.267 | 9.54E-27  | 1.22E+00    | Sertoli_cells | C4orf48    |
| TMEM130    | 0         | 1.057319313 | 0.331 | 0.018 | 0         | 18.38888889 | Sertoli_cells | TMEM130    |
| SLC7A5     | 0         | 1.056590348 | 0.34  | 0.033 | 0         | 10.3030303  | Sertoli_cells | SLC7A5     |
| RPS4X5     | 0         | 1.05213984  | 0.81  | 0.318 | 0         | 2.547169811 | Sertoli_cells | RPS4X      |
| GAMT1      | 0         | 1.043945392 | 0.387 | 0.091 | 0         | 4.252747253 | Sertoli_cells | GAMT       |
| MYL64      | 8.73E-306 | 1.043650028 | 0.802 | 0.656 | 5.35E-301 | 1.22E+00    | Sertoli_cells | MYL6       |
| REEP1      | 2.75E-267 | 1.03873483  | 0.362 | 0.107 | 1.69E-262 | 3.38E+00    | Sertoli_cells | REEP1      |
| PEBP11     | 1.97E-275 | 1.035576138 | 0.767 | 0.595 | 1.21E-270 | 1.29E+00    | Sertoli_cells | PEBP1      |
| GATM1      | 2.60E-278 | 1.035510004 | 0.377 | 0.112 | 1.59E-273 | 3.37E+00    | Sertoli_cells | GATM       |
| HMGCS2     | 0         | 1.030449538 | 0.338 | 0.015 | 0         | 22.53333333 | Sertoli_cells | HMGCS2     |
| CD994      | 7.65E-229 | 1.022499757 | 0.468 | 0.178 | 4.69E-224 | 2.63E+00    | Sertoli_cells | CD99       |
| TSPYL2     | 2.24E-187 | 1.021694125 | 0.458 | 0.211 | 1.38E-182 | 2.17E+00    | Sertoli_cells | TSPYL2     |
| INHA       | 0         | 1.021314718 | 0.329 | 0.012 | 0         | 27.41666667 | Sertoli_cells | INHA       |
| CCDC85B3   | 0         | 1.020638822 | 0.405 | 0.106 | 0         | 3.820754717 | Sertoli_cells | CCDC85B    |
| TUBA1A5    | 7.71E-293 | 1.016199836 | 0.512 | 0.183 | 4.73E-288 | 2.80E+00    | Sertoli_cells | TUBA1A     |
| S100A161   | 0         | 1.015636066 | 0.343 | 0.049 | 0         | 7           | Sertoli_cells | S100A16    |
| BEX4       | 0         | 1.012726271 | 0.368 | 0.083 | 0         | 4.43373494  | Sertoli_cells | BEX4       |
| MT.CYB3    | 3.13E-15  | 1.009184391 | 0.348 | 0.334 | 1.92E-10  | 1.04E+00    | Sertoli_cells | MT.CYB     |
| MRO        | 0         | 1.002312532 | 0.336 | 0.011 | 0         | 30.54545455 | Sertoli_cells | MRO        |
| TNP1       | 0         | 2.014407028 | 0.998 | 0.985 | 0         | 1.01319797  | spermatid     | TNP1       |
| PRM2       | 0         | 1.966700491 | 0.999 | 0.99  | 0         | 1.009090909 | spermatid     | PRM2       |
| CCDC168    | 0         | 1.796779127 | 0.636 | 0.201 | 0         | 3.164179104 | spermatid     | CCDC168    |
| AKAP4      | 0         | 1.711122018 | 0.779 | 0.364 | 0         | 2.14010989  | spermatid     | AKAP4      |
| PRM1       | 0         | 1.688848862 | 0.997 | 0.974 | 0         | 1.023613963 | spermatid     | PRM1       |
| LINC00919  | 0         | 1.681276077 | 0.76  | 0.417 | 0         | 1.822541966 | spermatid     | LINC00919  |
| LELP1      | 0         | 1.668992653 | 0.939 | 0.81  | 0         | 1.159259259 | spermatid     | LELP1      |
| FAM71A     | 0         | 1.667801309 | 0.714 | 0.252 | 0         | 2.833333333 | spermatid     | FAM71A     |
| OAZ3       | 0         | 1.666256471 | 0.859 | 0.498 | 0         | 1.724899598 | spermatid     | OAZ3       |
| SH3RF2     | 0         | 1.616578892 | 0.875 | 0.517 | 0         | 1.69245648  | spermatid     | SH3RF2     |
| AC007557.1 | 0         | 1.600462347 | 0.88  | 0.575 | 0         | 1.530434783 | spermatid     | AC007557.1 |
| HEMGN      | 0         | 1.555570117 | 0.762 | 0.286 | 0         | 2.664335664 | spermatid     | HEMGN      |
| ODF1       | 0         | 1.546165614 | 0.691 | 0.436 | 0         | 1.584862385 | spermatid     | ODF1       |
| HMGB4      | 0         | 1.542191119 | 0.986 | 0.879 | 0         | 1.121729238 | spermatid     | HMGB4      |
| C10orf62   | 0         | 1.531866879 | 0.86  | 0.435 | 0         | 1.977011494 | spermatid     | C10orf62   |
| TSSK6      | 0         | 1.525452937 | 0.762 | 0.309 | 0         | 2.466019417 | spermatid     | TSSK6      |
| GSG1       | 0         | 1.503359612 | 0.909 | 0.591 | 0         | 1.538071066 | spermatid     | GSG1       |
| FAM71B     | 0         | 1.491643784 | 0.683 | 0.159 | 0         | 4.295597484 | spermatid     | FAM71B     |
| CCSER2     | 0         | 1.461843158 | 0.844 | 0.49  | 0         | 1.72244898  | spermatid     | CCSER2     |
| C20orf141  | 0         | 1.445978799 | 0.804 | 0.319 | 0         | 2.520376176 | spermatid     | C20orf141  |
| RNF151     | 0         | 1.442648281 | 0.822 | 0.446 | 0         | 1.843049327 | spermatid     | RNF151     |
| SPATA42    | 0         | 1.439346913 | 0.814 | 0.365 | 0         | 2.230136986 | spermatid     | SPATA42    |
| SAMD4A     | 0         | 1.433617656 | 0.834 | 0.421 | 0         | 1.980997625 | spermatid     | SAMD4A     |
| GLUL       | 0         | 1.426578449 | 0.866 | 0.588 | 0         | 1.472789116 | spermatid     | GLUL       |
| AKAP1      | 0         | 1.423981567 | 0.752 | 0.308 | 0         | 2.441558442 | spermatid     | AKAP1      |
| SPATA3     | 0         | 1.414294077 | 0.804 | 0.374 | 0         | 2.14973262  | spermatid     | SPATA3     |
| CABS1      | 0         | 1.404886202 | 0.813 | 0.34  | 0         | 2.391176471 | spermatid     | CABS1      |
| TSPAN16    | 0         | 1.398377727 | 0.816 | 0.362 | 0         | 2.254143646 | spermatid     | TSPAN16    |
| NUPR2      | 0         | 1.395640917 | 0.959 | 0.699 | 0         | 1.371959943 | spermatid     | NUPR2      |
| IQCF2      | 0         | 1.37965009  | 0.78  | 0.347 | 0         | 2.247838617 | spermatid     | IQCF2      |
| C2orf57    | 0         | 1.361834212 | 0.74  | 0.239 | 0         | 3.09623431  | spermatid     | C2orf57    |
| TP53TG5    | 0         | 1.349539182 | 0.644 | 0.174 | 0         | 3.701149425 | spermatid     | TP53TG5    |
| SMCP       | 0         | 1.323666409 | 0.944 | 0.668 | 0         | 1.413173653 | spermatid     | SMCP       |
| GTSF1L     | 0         | 1.31813037  | 0.879 | 0.516 | 0         | 1.703488372 | spermatid     | GTSF1L     |
| FSCN3      | 0         | 1.316819004 | 0.674 | 0.171 | 0         | 3.941520468 | spermatid     | FSCN3      |
| PCP2       | 0         | 1.314857547 | 0.8   | 0.344 | 0         | 2.325581395 | spermatid     | PCP2       |
| C20orf144  | 0         | 1.302913274 | 0.72  | 0.416 | 0         | 1.730769231 | spermatid     | C20orf144  |
| IRGC       | 0         | 1.301348    | 0.828 | 0.423 | 0         | 1.957446809 | spermatid     | IRGC       |
| CAPZA3     | 0         | 1.301324338 | 0.863 | 0.519 | 0         | 1.662813102 | spermatid     | CAPZA3     |
| NFKBIB     | 0         | 1.300216717 | 0.729 | 0.321 | 0         | 2.271028037 | spermatid     | NFKBIB     |
| CXCL16     | 0         | 1.293242388 | 0.808 | 0.417 | 0         | 1.93764988  | spermatid     | CXCL16     |
| CLPB       | 0         | 1.29262138  | 0.84  | 0.464 | 0         | 1.810344828 | spermatid     | CLPB       |
| FAM209A    | 0         | 1.291265643 | 0.751 | 0.423 | 0         | 1.775413712 | spermatid     | FAM209A    |
| GAPDHS     | 0         | 1.288620756 | 0.879 | 0.495 | 0         | 1.775757576 | spermatid     | GAPDHS     |
| CYLC2      | 0         | 1.286780758 | 0.875 | 0.485 | 0         | 1.804123711 | spermatid     | CYLC2      |
| TPPP2      | 0         | 1.285266441 | 0.872 | 0.519 | 0         | 1.680154143 | spermatid     | TPPP2      |
| CCDC91     | 0         | 1.280548747 | 0.902 | 0.606 | 0         | 1.488448845 | spermatid     | CCDC91     |

|             |           |             |       |       |             |             |           |             |
|-------------|-----------|-------------|-------|-------|-------------|-------------|-----------|-------------|
| C17orf105   | 0         | 1.266197216 | 0.777 | 0.381 | 0           | 2.039370079 | spermatid | C17orf105   |
| ACTL7A      | 0         | 1.265786792 | 0.854 | 0.461 | 0           | 1.852494577 | spermatid | ACTL7A      |
| DCUN1D1     | 0         | 1.25862545  | 0.903 | 0.687 | 0           | 1.31441048  | spermatid | DCUN1D1     |
| IQCF1       | 0         | 1.25443413  | 0.795 | 0.396 | 0           | 2.007575758 | spermatid | IQCF1       |
| DNAJB8      | 0         | 1.250733728 | 0.787 | 0.339 | 0           | 2.321533923 | spermatid | DNAJB8      |
| UBQLN3      | 0         | 1.250221642 | 0.793 | 0.385 | 0           | 2.05974026  | spermatid | UBQLN3      |
| PRSS37      | 0         | 1.245352344 | 0.603 | 0.123 | 0           | 4.902439024 | spermatid | PRSS37      |
| ZNF683      | 0         | 1.24297888  | 0.684 | 0.183 | 0           | 3.737704918 | spermatid | ZNF683      |
| SPERT       | 0         | 1.240150959 | 0.758 | 0.306 | 0           | 2.477124183 | spermatid | SPERT       |
| HOOK1       | 0         | 1.238979543 | 0.778 | 0.44  | 0           | 1.768181818 | spermatid | HOOK1       |
| HBB         | 2.33E-08  | 1.224967452 | 0.043 | 0.03  | 0.001427552 | 1.433333333 | spermatid | HBB         |
| FAM71C      | 0         | 1.224579404 | 0.609 | 0.106 | 0           | 5.745283019 | spermatid | FAM71C      |
| IQCF3       | 0         | 1.222496065 | 0.8   | 0.371 | 0           | 2.156334232 | spermatid | IQCF3       |
| CRISP2      | 0         | 1.221798355 | 0.965 | 0.81  | 0           | 1.191358025 | spermatid | CRISP2      |
| LINC00608   | 0         | 1.220887859 | 0.744 | 0.269 | 0           | 2.765799257 | spermatid | LINC00608   |
| TSKS        | 0         | 1.214546708 | 0.787 | 0.392 | 0           | 2.007653061 | spermatid | TSKS        |
| LINC00238   | 0         | 1.214375803 | 0.373 | 0.088 | 0           | 4.238636364 | spermatid | LINC00238   |
| OXCT2       | 0         | 1.212432967 | 0.68  | 0.144 | 0           | 4.722222222 | spermatid | OXCT2       |
| C16orf82    | 0         | 1.210500513 | 0.789 | 0.391 | 0           | 2.017902813 | spermatid | C16orf82    |
| FAM187B     | 0         | 1.197135094 | 0.657 | 0.155 | 0           | 4.238709677 | spermatid | FAM187B     |
| FAM209B     | 0         | 1.193910109 | 0.737 | 0.434 | 0           | 1.698156682 | spermatid | FAM209B     |
| DNAJC4      | 0         | 1.193855079 | 0.786 | 0.385 | 0           | 2.041558442 | spermatid | DNAJC4      |
| FAM46C      | 0         | 1.193299674 | 0.761 | 0.376 | 0           | 2.02393617  | spermatid | FAM46C      |
| PROCA1      | 0         | 1.192182995 | 0.868 | 0.621 | 0           | 1.397745572 | spermatid | PROCA1      |
| HSPA1L      | 0         | 1.191018424 | 0.663 | 0.234 | 0           | 2.833333333 | spermatid | HSPA1L      |
| TSSK2       | 0         | 1.189296809 | 0.814 | 0.438 | 0           | 1.858447489 | spermatid | TSSK2       |
| H1FNT       | 0         | 1.186979413 | 0.867 | 0.488 | 0           | 1.776639344 | spermatid | H1FNT       |
| FAM71F1     | 0         | 1.184216604 | 0.778 | 0.391 | 0           | 1.989769821 | spermatid | FAM71F1     |
| SCP2D1      | 0         | 1.183189377 | 0.659 | 0.178 | 0           | 3.702247191 | spermatid | SCP2D1      |
| ACE         | 0         | 1.182582294 | 0.778 | 0.379 | 0           | 2.052770449 | spermatid | ACE         |
| SPATA12     | 0         | 1.179719401 | 0.692 | 0.174 | 0           | 3.977011494 | spermatid | SPATA12     |
| SMKR1       | 0         | 1.179708153 | 0.884 | 0.575 | 0           | 1.537391304 | spermatid | SMKR1       |
| LEMD1       | 0         | 1.179408494 | 0.76  | 0.324 | 0           | 2.345679012 | spermatid | LEMD1       |
| PRSS58      | 0         | 1.178982652 | 0.547 | 0.117 | 0           | 4.675213675 | spermatid | PRSS58      |
| OTUB2       | 0         | 1.176821516 | 0.67  | 0.233 | 0           | 2.875536481 | spermatid | OTUB2       |
| CLMN        | 0         | 1.175457952 | 0.66  | 0.26  | 0           | 2.538461538 | spermatid | CLMN        |
| TFAM        | 0         | 1.175301117 | 0.73  | 0.424 | 0           | 1.721698113 | spermatid | TFAM        |
| ACSBG2      | 0         | 1.173266981 | 0.778 | 0.383 | 0           | 2.031331593 | spermatid | ACSBG2      |
| ISG20L2     | 0         | 1.171852002 | 0.77  | 0.436 | 0           | 1.766055046 | spermatid | ISG20L2     |
| ACTL9       | 0         | 1.170685137 | 0.744 | 0.31  | 0           | 2.4         | spermatid | ACTL9       |
| SPATA18     | 0         | 1.169745379 | 0.755 | 0.349 | 0           | 2.163323782 | spermatid | SPATA18     |
| C10orf82    | 0         | 1.168513507 | 0.76  | 0.361 | 0           | 2.105263158 | spermatid | C10orf82    |
| C17orf74    | 0         | 1.16709969  | 0.681 | 0.186 | 0           | 3.661290323 | spermatid | C17orf74    |
| TEX35       | 0         | 1.16492325  | 0.771 | 0.386 | 0           | 1.997409326 | spermatid | TEX35       |
| C1orf100    | 0         | 1.159907695 | 0.655 | 0.256 | 0           | 2.55859375  | spermatid | C1orf100    |
| SPTY2D1.AS1 | 0         | 1.157466453 | 0.389 | 0.158 | 0           | 2.462025316 | spermatid | SPTY2D1.AS1 |
| ST6GALNAC2  | 0         | 1.155524459 | 0.74  | 0.333 | 0           | 2.222222222 | spermatid | ST6GALNAC2  |
| FNDC8       | 0         | 1.147612252 | 0.664 | 0.176 | 0           | 3.772727273 | spermatid | FNDC8       |
| FAM134B     | 0         | 1.146976817 | 0.734 | 0.275 | 0           | 2.669090909 | spermatid | FAM134B     |
| ACTRT2      | 0         | 1.143980063 | 0.839 | 0.435 | 0           | 1.928735632 | spermatid | ACTRT2      |
| CARHSP1     | 0         | 1.143749159 | 0.888 | 0.628 | 0           | 1.414012739 | spermatid | CARHSP1     |
| TMEM31      | 0         | 1.136454822 | 0.654 | 0.257 | 0           | 2.544747082 | spermatid | TMEM31      |
| TXNDC2      | 0         | 1.133497761 | 0.657 | 0.224 | 0           | 2.933035714 | spermatid | TXNDC2      |
| C10orf120   | 0         | 1.133141718 | 0.613 | 0.178 | 0           | 3.443820225 | spermatid | C10orf120   |
| CCDC70      | 0         | 1.131775041 | 0.805 | 0.374 | 0           | 2.152406417 | spermatid | CCDC70      |
| TEX37       | 0         | 1.1302264   | 0.631 | 0.159 | 0           | 3.968553459 | spermatid | TEX37       |
| TMEM191C    | 0         | 1.129825747 | 0.622 | 0.274 | 0           | 2.270072993 | spermatid | TMEM191C    |
| KIF2B       | 0         | 1.128023939 | 0.739 | 0.331 | 0           | 2.232628399 | spermatid | KIF2B       |
| TNP2        | 0         | 1.124094274 | 0.475 | 0.134 | 0           | 3.544776119 | spermatid | TNP2        |
| TEX38       | 0         | 1.123400653 | 0.903 | 0.531 | 0           | 1.700564972 | spermatid | TEX38       |
| SPATA20     | 0         | 1.12219738  | 0.78  | 0.399 | 0           | 1.954887218 | spermatid | SPATA20     |
| TUBA4A      | 0         | 1.121182489 | 0.657 | 0.188 | 0           | 3.494680851 | spermatid | TUBA4A      |
| FHL5        | 0         | 1.120662874 | 0.785 | 0.401 | 0           | 1.957605985 | spermatid | FHL5        |
| BANF2       | 0         | 1.119243498 | 0.708 | 0.273 | 0           | 2.593406593 | spermatid | BANF2       |
| TMCO5A      | 0         | 1.118417922 | 0.85  | 0.469 | 0           | 1.812366738 | spermatid | TMCO5A      |
| UBL4B       | 0         | 1.117262681 | 0.828 | 0.461 | 0           | 1.796095445 | spermatid | UBL4B       |
| LPIN1       | 0         | 1.116924348 | 0.708 | 0.326 | 0           | 2.171779141 | spermatid | LPIN1       |
| TRIM36      | 0         | 1.104152115 | 0.867 | 0.631 | 0           | 1.374009509 | spermatid | TRIM36      |
| IQGAP2      | 0         | 1.100035781 | 0.743 | 0.38  | 0           | 1.955263158 | spermatid | IQGAP2      |
| TSSK1B      | 0         | 1.096826745 | 0.743 | 0.321 | 0           | 2.314641745 | spermatid | TSSK1B      |
| EIF4E       | 0         | 1.095828168 | 0.771 | 0.492 | 0           | 1.567073171 | spermatid | EIF4E       |
| SPTY2D1-AS1 | 8.38E-277 | 1.095272159 | 0.506 | 0.437 | 5.14E-272   | 1.16E+00    | spermatid | SPTY2D1-AS1 |
| PHOSPHO1    | 0         | 1.085054286 | 0.592 | 0.162 | 0           | 3.654320988 | spermatid | PHOSPHO1    |
| C12orf54    | 0         | 1.08267786  | 0.674 | 0.291 | 0           | 2.316151203 | spermatid | C12orf54    |
| SPACA3      | 0         | 1.079896565 | 0.776 | 0.392 | 0           | 1.979591837 | spermatid | SPACA3      |



|               |   |             |       |       |   |             |              |               |
|---------------|---|-------------|-------|-------|---|-------------|--------------|---------------|
| CCDC185       | 0 | 1.07798541  | 0.573 | 0.164 | 0 | 3.493902439 | spermatid    | CCDC185       |
| DNAJA4        | 0 | 1.075654541 | 0.775 | 0.451 | 0 | 1.718403548 | spermatid    | DNAJA4        |
| CEP170        | 0 | 1.073410956 | 0.731 | 0.423 | 0 | 1.728132388 | spermatid    | CEP170        |
| LINC01350     | 0 | 1.073018182 | 0.664 | 0.233 | 0 | 2.849785408 | spermatid    | LINC01350     |
| C2orf88       | 0 | 1.070648098 | 0.72  | 0.449 | 0 | 1.603563474 | spermatid    | C2orf88       |
| GLRX2         | 0 | 1.068347906 | 0.709 | 0.299 | 0 | 2.371237458 | spermatid    | GLRX2         |
| NRDC          | 0 | 1.060098263 | 0.814 | 0.495 | 0 | 1.644444444 | spermatid    | NRDC          |
| SPATA6        | 0 | 1.057958661 | 0.866 | 0.638 | 0 | 1.357366771 | spermatid    | SPATA6        |
| FAM71E1       | 0 | 1.05581497  | 0.807 | 0.496 | 0 | 1.627016129 | spermatid    | FAM71E1       |
| C9orf24       | 0 | 1.054342839 | 0.784 | 0.442 | 0 | 1.773755656 | spermatid    | C9orf24       |
| RFPL3S        | 0 | 1.053985307 | 0.707 | 0.316 | 0 | 2.237341772 | spermatid    | RFPL3S        |
| CCIN          | 0 | 1.053195229 | 0.671 | 0.3   | 0 | 2.236666667 | spermatid    | CCIN          |
| PRH1          | 0 | 1.051672237 | 0.672 | 0.263 | 0 | 2.55513308  | spermatid    | PRH1          |
| FAM205C       | 0 | 1.050278917 | 0.601 | 0.113 | 0 | 5.318584071 | spermatid    | FAM205C       |
| TMEM210       | 0 | 1.049457505 | 0.678 | 0.292 | 0 | 2.321917808 | spermatid    | TMEM210       |
| G2E3          | 0 | 1.048216538 | 0.66  | 0.373 | 0 | 1.769436997 | spermatid    | G2E3          |
| SPATA19       | 0 | 1.047736381 | 0.727 | 0.34  | 0 | 2.138235294 | spermatid    | SPATA19       |
| TMEM190       | 0 | 1.047224605 | 0.491 | 0.206 | 0 | 2.383495146 | spermatid    | TMEM190       |
| C11orf71      | 0 | 1.046552538 | 0.835 | 0.614 | 0 | 1.359934853 | spermatid    | C11orf71      |
| ERICH2        | 0 | 1.041688401 | 0.772 | 0.527 | 0 | 1.464895636 | spermatid    | ERICH2        |
| TMCO2         | 0 | 1.040163302 | 0.815 | 0.489 | 0 | 1.666666667 | spermatid    | TMCO2         |
| MORN3         | 0 | 1.034700594 | 0.653 | 0.196 | 0 | 3.331632653 | spermatid    | MORN3         |
| CABYR         | 0 | 1.033688586 | 0.897 | 0.652 | 0 | 1.375766871 | spermatid    | CABYR         |
| PAQR7         | 0 | 1.032503837 | 0.675 | 0.261 | 0 | 2.586206897 | spermatid    | PAQR7         |
| MS4A14        | 0 | 1.030389573 | 0.687 | 0.311 | 0 | 2.209003215 | spermatid    | MS4A14        |
| FAM81B        | 0 | 1.027835823 | 0.795 | 0.416 | 0 | 1.911057692 | spermatid    | FAM81B        |
| TEX26         | 0 | 1.027535738 | 0.697 | 0.337 | 0 | 2.068249258 | spermatid    | TEX26         |
| AKAP3         | 0 | 1.021670657 | 0.756 | 0.517 | 0 | 1.462282398 | spermatid    | AKAP3         |
| PSMF1         | 0 | 1.015951532 | 0.837 | 0.676 | 0 | 1.23816568  | spermatid    | PSMF1         |
| BPIFA3        | 0 | 1.014622394 | 0.739 | 0.342 | 0 | 2.160818713 | spermatid    | BPIFA3        |
| DNAJC5B       | 0 | 1.01451615  | 0.763 | 0.376 | 0 | 2.029255319 | spermatid    | DNAJC5B       |
| SMIM6         | 0 | 1.013627189 | 0.648 | 0.225 | 0 | 2.88        | spermatid    | SMIM6         |
| CCNY          | 0 | 1.013412591 | 0.792 | 0.549 | 0 | 1.442622951 | spermatid    | CCNY          |
| ODF2          | 0 | 1.013253795 | 0.921 | 0.774 | 0 | 1.189922481 | spermatid    | ODF2          |
| FAM229A       | 0 | 1.010992348 | 0.769 | 0.506 | 0 | 1.519762846 | spermatid    | FAM229A       |
| RNF133        | 0 | 1.005438836 | 0.663 | 0.198 | 0 | 3.348484848 | spermatid    | RNF133        |
| EHD1          | 0 | 1.004966188 | 0.8   | 0.549 | 0 | 1.4571949   | spermatid    | EHD1          |
| FBXO39        | 0 | 1.002765128 | 0.601 | 0.151 | 0 | 3.98013245  | spermatid    | FBXO39        |
| RP5-1023B21.1 | 0 | 1.634303983 | 0.569 | 0.318 | 0 | 1.789308176 | spermatocyte | RP5-1023B21.1 |
| CCDC110       | 0 | 1.530789876 | 0.992 | 0.436 | 0 | 2.275229358 | spermatocyte | CCDC110       |
| TBPL1         | 0 | 1.489331899 | 0.978 | 0.427 | 0 | 2.290398126 | spermatocyte | TBPL1         |
| LDHC          | 0 | 1.387035444 | 0.996 | 0.581 | 0 | 1.714285714 | spermatocyte | LDHC          |
| PTTG1         | 0 | 1.380888361 | 0.988 | 0.456 | 0 | 2.166666667 | spermatocyte | PTTG1         |
| CCNA1         | 0 | 1.334787395 | 0.93  | 0.274 | 0 | 3.394160584 | spermatocyte | CCNA1         |
| DBF4          | 0 | 1.328710594 | 0.987 | 0.433 | 0 | 2.279445727 | spermatocyte | DBF4          |
| PPP3R2        | 0 | 1.318933981 | 0.975 | 0.452 | 0 | 2.157079646 | spermatocyte | PPP3R2        |
| PSMG1         | 0 | 1.277115783 | 0.983 | 0.471 | 0 | 2.087048832 | spermatocyte | PSMG1         |
| CETN1         | 0 | 1.274471716 | 0.991 | 0.574 | 0 | 1.726480836 | spermatocyte | CETN1         |
| ZMYND10       | 0 | 1.24013452  | 0.965 | 0.387 | 0 | 2.493540052 | spermatocyte | ZMYND10       |
| PRKCDBP       | 0 | 1.229797256 | 0.91  | 0.351 | 0 | 2.592592593 | spermatocyte | PRKCDBP       |
| LYAR          | 0 | 1.226779928 | 0.928 | 0.363 | 0 | 2.556473829 | spermatocyte | LYAR          |
| CCNB2         | 0 | 1.221245278 | 0.949 | 0.296 | 0 | 3.206081081 | spermatocyte | CCNB2         |
| SPINK2        | 0 | 1.219989303 | 0.993 | 0.697 | 0 | 1.424677188 | spermatocyte | SPINK2        |
| ANKRD7        | 0 | 1.212887063 | 0.998 | 0.755 | 0 | 1.321854305 | spermatocyte | ANKRD7        |
| LRWD1         | 0 | 1.210822523 | 0.992 | 0.541 | 0 | 1.833641405 | spermatocyte | LRWD1         |
| CCDC42        | 0 | 1.209718757 | 0.904 | 0.251 | 0 | 3.601593625 | spermatocyte | CCDC42        |
| SPATA16       | 0 | 1.208255861 | 0.958 | 0.263 | 0 | 3.642585551 | spermatocyte | SPATA16       |
| PBK           | 0 | 1.204109848 | 0.975 | 0.385 | 0 | 2.532467532 | spermatocyte | PBK           |
| MCHR2-AS1     | 0 | 1.20408534  | 0.565 | 0.199 | 0 | 2.83919598  | spermatocyte | MCHR2-AS1     |
| LINC01016     | 0 | 1.186592644 | 0.938 | 0.352 | 0 | 2.664772727 | spermatocyte | LINC01016     |
| CLGN          | 0 | 1.178703266 | 0.972 | 0.389 | 0 | 2.498714653 | spermatocyte | CLGN          |
| LYRM5         | 0 | 1.17442062  | 0.917 | 0.334 | 0 | 2.745508982 | spermatocyte | LYRM5         |
| CCDC173       | 0 | 1.172021164 | 0.991 | 0.48  | 0 | 2.064583333 | spermatocyte | CCDC173       |
| CCDC62        | 0 | 1.167739491 | 0.977 | 0.298 | 0 | 3.27852349  | spermatocyte | CCDC62        |
| AC004381.6    | 0 | 1.158955475 | 0.988 | 0.466 | 0 | 2.120171674 | spermatocyte | AC004381.6    |
| RP5.1023B21.1 | 0 | 1.149621915 | 0.379 | 0.108 | 0 | 3.509259259 | spermatocyte | RP5.1023B21.1 |
| SNRPC         | 0 | 1.148132833 | 0.952 | 0.416 | 0 | 2.288461538 | spermatocyte | SNRPC         |
| GTF2A2        | 0 | 1.144773243 | 0.989 | 0.683 | 0 | 1.448023426 | spermatocyte | GTF2A2        |
| SCCPDH        | 0 | 1.134084837 | 0.994 | 0.621 | 0 | 1.600644122 | spermatocyte | SCCPDH        |
| MNS1          | 0 | 1.127603544 | 0.976 | 0.389 | 0 | 2.508997429 | spermatocyte | MNS1          |
| GYG1          | 0 | 1.126662573 | 0.925 | 0.399 | 0 | 2.318295739 | spermatocyte | GYG1          |
| CCT6B         | 0 | 1.12148102  | 0.991 | 0.492 | 0 | 2.014227642 | spermatocyte | CCT6B         |
| GKAP1         | 0 | 1.115976427 | 0.994 | 0.672 | 0 | 1.479166667 | spermatocyte | GKAP1         |
| ZPBP          | 0 | 1.095913439 | 0.988 | 0.48  | 0 | 2.058333333 | spermatocyte | ZPBP          |
| PFN4          | 0 | 1.089152562 | 0.949 | 0.304 | 0 | 3.121710526 | spermatocyte | PFN4          |

|              |           |             |       |       |           |             |               |              |
|--------------|-----------|-------------|-------|-------|-----------|-------------|---------------|--------------|
| RP5-942I16.1 | 0         | 1.08874198  | 0.564 | 0.228 | 0         | 2.473684211 | spermatocyte  | RP5-942I16.1 |
| GS1-259H13.2 | 0         | 1.08717613  | 0.565 | 0.233 | 0         | 2.424892704 | spermatocyte  | GS1-259H13.2 |
| SPAG6        | 0         | 1.084254332 | 0.949 | 0.312 | 0         | 3.041666667 | spermatocyte  | SPAG6        |
| NAA20        | 0         | 1.082432973 | 0.966 | 0.378 | 0         | 2.555555556 | spermatocyte  | NAA20        |
| HDGFL1       | 0         | 1.080174314 | 0.973 | 0.428 | 0         | 2.273364486 | spermatocyte  | HDGFL1       |
| AURKA        | 0         | 1.07316644  | 0.757 | 0.173 | 0         | 4.375722543 | spermatocyte  | AURKA        |
| FBXO25       | 0         | 1.068185589 | 0.984 | 0.514 | 0         | 1.914396887 | spermatocyte  | FBXO25       |
| H2AFJ        | 0         | 1.067607145 | 0.996 | 0.767 | 0         | 1.298565841 | spermatocyte  | H2AFJ        |
| ZBPB2        | 0         | 1.06633555  | 0.966 | 0.399 | 0         | 2.421052632 | spermatocyte  | ZBPB2        |
| IZUMO4       | 0         | 1.061386838 | 0.991 | 0.669 | 0         | 1.481315396 | spermatocyte  | IZUMO4       |
| APH1B        | 0         | 1.0569322   | 0.992 | 0.585 | 0         | 1.695726496 | spermatocyte  | APH1B        |
| RGCC         | 0         | 1.055846454 | 0.762 | 0.125 | 0         | 6.096       | spermatocyte  | RGCC         |
| ASRGL1       | 0         | 1.053407162 | 0.96  | 0.482 | 0         | 1.991701245 | spermatocyte  | ASRGL1       |
| KIF9         | 0         | 1.037800678 | 0.969 | 0.428 | 0         | 2.264018692 | spermatocyte  | KIF9         |
| NKAPL        | 0         | 1.037505588 | 0.946 | 0.301 | 0         | 3.142857143 | spermatocyte  | NKAPL        |
| C7orf55      | 0         | 1.037277911 | 0.948 | 0.362 | 0         | 2.61878453  | spermatocyte  | C7orf55      |
| C1orf56      | 0         | 1.025873417 | 0.976 | 0.401 | 0         | 2.433915212 | spermatocyte  | C1orf56      |
| TEX40        | 0         | 1.018955035 | 0.581 | 0.515 | 0         | 1.12815534  | spermatocyte  | TEX40        |
| TMIGD3       | 0         | 1.018641516 | 0.903 | 0.267 | 0         | 3.382022472 | spermatocyte  | TMIGD3       |
| SPESP1       | 0         | 1.015116922 | 0.966 | 0.397 | 0         | 2.43324937  | spermatocyte  | SPESP1       |
| ATPIF1       | 0         | 1.006656181 | 0.993 | 0.69  | 0         | 1.439130435 | spermatocyte  | ATPIF1       |
| LCA5L        | 0         | 1.004122475 | 0.992 | 0.571 | 0         | 1.737302977 | spermatocyte  | LCA5L        |
| CCDC83       | 0         | 1.003772754 | 0.925 | 0.289 | 0         | 3.200692042 | spermatocyte  | CCDC83       |
| COPRS        | 0         | 1.002381556 | 0.983 | 0.61  | 0         | 1.61147541  | spermatocyte  | COPRS        |
| HIST1H4C     | 0         | 2.137783371 | 0.648 | 0.133 | 0         | 4.872180451 | spermatogonia | HIST1H4C     |
| SMC3         | 0         | 1.868053418 | 0.779 | 0.316 | 0         | 2.465189873 | spermatogonia | SMC3         |
| TEX101       | 0         | 1.857390898 | 0.57  | 0.134 | 0         | 4.253731343 | spermatogonia | TEX101       |
| HIST1H2AA    | 0         | 1.668180323 | 0.533 | 0.153 | 0         | 3.483660131 | spermatogonia | HIST1H2AA    |
| TOP2A        | 0         | 1.665959043 | 0.693 | 0.239 | 0         | 2.89958159  | spermatogonia | TOP2A        |
| ZCWPW1       | 0         | 1.62844774  | 0.719 | 0.257 | 0         | 2.79766537  | spermatogonia | ZCWPW1       |
| SYCP3        | 0         | 1.576980764 | 0.685 | 0.256 | 0         | 2.67578125  | spermatogonia | SYCP3        |
| MT.CO1       | 2.09E-114 | 1.561129478 | 0.392 | 0.326 | 1.28E-109 | 1.20E+00    | spermatogonia | MT.CO1       |
| SMC1B        | 0         | 1.557804682 | 0.696 | 0.287 | 0         | 2.425087108 | spermatogonia | SMC1B        |
| SYCP1        | 7.74E-270 | 1.538625933 | 0.564 | 0.413 | 4.75E-265 | 1.37E+00    | spermatogonia | SYCP1        |
| HMGA1        | 0         | 1.520084631 | 0.532 | 0.088 | 0         | 6.045454545 | spermatogonia | HMGA1        |
| FMR1NB       | 0         | 1.491527206 | 0.533 | 0.089 | 0         | 5.988764045 | spermatogonia | FMR1NB       |
| TKTL1        | 0         | 1.462224641 | 0.531 | 0.157 | 0         | 3.382165605 | spermatogonia | TKTL1        |
| NASP         | 0         | 1.443823864 | 0.846 | 0.329 | 0         | 2.571428571 | spermatogonia | NASP         |
| MT.ND4       | 1.76E-71  | 1.399605175 | 0.392 | 0.37  | 1.08E-66  | 1.06E+00    | spermatogonia | MT.ND4       |
| MT.CO3       | 2.23E-120 | 1.377640511 | 0.391 | 0.312 | 1.37E-115 | 1.25E+00    | spermatogonia | MT.CO3       |
| MEIOB        | 0         | 1.367214554 | 0.466 | 0.131 | 0         | 3.557251908 | spermatogonia | MEIOB        |
| LY6K         | 0         | 1.341604732 | 0.545 | 0.062 | 0         | 8.790322581 | spermatogonia | LY6K         |
| WBSCR22      | 0         | 1.336204844 | 0.796 | 0.328 | 0         | 2.426829268 | spermatogonia | WBSCR22      |
| MTATP6P1     | 2.40E-276 | 1.321078481 | 0.379 | 0.196 | 1.47E-271 | 1.93E+00    | spermatogonia | MTATP6P1     |
| NCL          | 0         | 1.304811857 | 0.824 | 0.341 | 0         | 2.416422287 | spermatogonia | NCL          |
| RAD51AP2     | 0         | 1.299923917 | 0.272 | 0.09  | 0         | 3.022222222 | spermatogonia | RAD51AP2     |
| DNAJB6       | 0         | 1.296510678 | 0.805 | 0.458 | 0         | 1.757641921 | spermatogonia | DNAJB6       |
| MT.ATP6      | 3.33E-89  | 1.283571261 | 0.388 | 0.336 | 2.04E-84  | 1.15E+00    | spermatogonia | MT.ATP6      |
| MT.CO2       | 3.30E-105 | 1.276924687 | 0.388 | 0.321 | 2.03E-100 | 1.21E+00    | spermatogonia | MT.CO2       |
| HMGB2        | 0         | 1.27495277  | 0.776 | 0.327 | 0         | 2.373088685 | spermatogonia | HMGB2        |
| RPSA         | 0         | 1.266399682 | 0.804 | 0.571 | 0         | 1.408056042 | spermatogonia | RPSA         |
| HERC5        | 0         | 1.262448432 | 0.582 | 0.278 | 0         | 2.09352518  | spermatogonia | HERC5        |
| CCNI         | 0         | 1.250427457 | 0.797 | 0.479 | 0         | 1.66388309  | spermatogonia | CCNI         |
| HNRNPA2B1    | 0         | 1.227085764 | 0.905 | 0.628 | 0         | 1.441082803 | spermatogonia | HNRNPA2B1    |
| NAE1         | 0         | 1.221647953 | 0.67  | 0.082 | 0         | 8.170731707 | spermatogonia | NAE1         |
| MT-CO3       | 3.58E-167 | 1.215871175 | 0.533 | 0.452 | 2.20E-162 | 1.18E+00    | spermatogonia | MT-CO3       |
| DPEP3        | 0         | 1.21030811  | 0.583 | 0.132 | 0         | 4.416666667 | spermatogonia | DPEP3        |
| MT-CO2       | 3.30E-186 | 1.193011962 | 0.517 | 0.414 | 2.02E-181 | 1.25E+00    | spermatogonia | MT-CO2       |
| SCML1        | 0         | 1.191640523 | 0.421 | 0.197 | 0         | 2.137055838 | spermatogonia | SCML1        |
| MTCO1P12     | 0         | 1.177774832 | 0.379 | 0.177 | 0         | 2.141242938 | spermatogonia | MTCO1P12     |
| CASC5        | 0         | 1.164692089 | 0.68  | 0.222 | 0         | 3.063063063 | spermatogonia | CASC5        |
| BCAP31       | 0         | 1.16247561  | 0.57  | 0.14  | 0         | 4.071428571 | spermatogonia | BCAP31       |
| HORMAD1      | 0         | 1.152618246 | 0.632 | 0.404 | 0         | 1.564356436 | spermatogonia | HORMAD1      |
| PTGES3       | 0         | 1.139057468 | 0.824 | 0.451 | 0         | 1.827050998 | spermatogonia | PTGES3       |
| MT.ND1       | 2.65E-65  | 1.137872856 | 0.393 | 0.376 | 1.62E-60  | 1.05E+00    | spermatogonia | MT.ND1       |
| MT.ND5       | 2.91E-115 | 1.132683616 | 0.384 | 0.3   | 1.79E-110 | 1.28E+00    | spermatogonia | MT.ND5       |
| MT.ND2       | 1.91E-59  | 1.130186724 | 0.393 | 0.383 | 1.17E-54  | 1.03E+00    | spermatogonia | MT.ND2       |
| MT.CYB       | 8.29E-85  | 1.123525967 | 0.383 | 0.322 | 5.08E-80  | 1.19E+00    | spermatogonia | MT.CYB       |
| SPINT2       | 0         | 1.121256508 | 0.777 | 0.453 | 0         | 1.715231788 | spermatogonia | SPINT2       |
| HSP90AA1     | 0         | 1.11843778  | 0.983 | 0.844 | 0         | 1.164691943 | spermatogonia | HSP90AA1     |
| MT-CO1       | 2.21E-164 | 1.117629406 | 0.521 | 0.435 | 1.36E-159 | 1.20E+00    | spermatogonia | MT-CO1       |
| CKS2         | 0         | 1.114743437 | 0.804 | 0.373 | 0         | 2.155495979 | spermatogonia | CKS2         |
| HMGB1        | 0         | 1.111879515 | 0.765 | 0.493 | 0         | 1.551724138 | spermatogonia | HMGB1        |
| PSMD1        | 0         | 1.103137701 | 0.658 | 0.155 | 0         | 4.24516129  | spermatogonia | PSMD1        |
| VCX3B        | 0         | 1.102279442 | 0.486 | 0.115 | 0         | 4.226086957 | spermatogonia | VCX3B        |

|          |           |             |       |       |           |             |               |          |
|----------|-----------|-------------|-------|-------|-----------|-------------|---------------|----------|
| SMC4     | 0         | 1.100422665 | 0.749 | 0.352 | 0         | 2.127840909 | spermatogonia | SMC4     |
| VCX      | 0         | 1.099264382 | 0.472 | 0.13  | 0         | 3.630769231 | spermatogonia | VCX      |
| CBX1     | 0         | 1.091212379 | 0.716 | 0.232 | 0         | 3.086206897 | spermatogonia | CBX1     |
| RPS12    | 0         | 1.084612316 | 0.903 | 0.815 | 0         | 1.10797546  | spermatogonia | RPS12    |
| EIF1B    | 0         | 1.082792279 | 0.755 | 0.447 | 0         | 1.689038031 | spermatogonia | EIF1B    |
| RNPS1    | 0         | 1.077603043 | 0.711 | 0.21  | 0         | 3.385714286 | spermatogonia | RNPS1    |
| PAGE2B   | 0         | 1.063196385 | 0.497 | 0.111 | 0         | 4.477477477 | spermatogonia | PAGE2B   |
| HSP90AB1 | 0         | 1.057286621 | 0.899 | 0.669 | 0         | 1.343796712 | spermatogonia | HSP90AB1 |
| DAZL     | 0         | 1.05592653  | 0.687 | 0.333 | 0         | 2.063063063 | spermatogonia | DAZL     |
| DUT      | 0         | 1.046954035 | 0.715 | 0.355 | 0         | 2.014084507 | spermatogonia | DUT      |
| C5orf47  | 0         | 1.041277528 | 0.631 | 0.331 | 0         | 1.906344411 | spermatogonia | C5orf47  |
| PTMA     | 0         | 1.036705059 | 0.916 | 0.585 | 0         | 1.565811966 | spermatogonia | PTMA     |
| SRSF9    | 0         | 1.034963692 | 0.714 | 0.345 | 0         | 2.069565217 | spermatogonia | SRSF9    |
| PDIA3    | 0         | 1.031738156 | 0.771 | 0.354 | 0         | 2.177966102 | spermatogonia | PDIA3    |
| VCX2     | 0         | 1.026229305 | 0.433 | 0.147 | 0         | 2.945578231 | spermatogonia | VCX2     |
| BTG3     | 0         | 1.025921253 | 0.638 | 0.108 | 0         | 5.907407407 | spermatogonia | BTG3     |
| MTND1P23 | 1.39E-65  | 1.024623659 | 0.391 | 0.369 | 8.54E-61  | 1.06E+00    | spermatogonia | MTND1P23 |
| DDX24    | 0         | 1.024475448 | 0.871 | 0.566 | 0         | 1.538869258 | spermatogonia | DDX24    |
| CCT8     | 0         | 1.022678037 | 0.716 | 0.245 | 0         | 2.92244898  | spermatogonia | CCT8     |
| UBA2     | 0         | 1.015870229 | 0.745 | 0.326 | 0         | 2.285276074 | spermatogonia | UBA2     |
| RPN2     | 0         | 1.014072835 | 0.746 | 0.399 | 0         | 1.869674185 | spermatogonia | RPN2     |
| HNRNPA3  | 0         | 1.012438855 | 0.804 | 0.495 | 0         | 1.624242424 | spermatogonia | HNRNPA3  |
| CLSPN    | 0         | 1.008966061 | 0.372 | 0.06  | 0         | 6.2         | spermatogonia | CLSPN    |
| RCN2     | 0         | 1.007554328 | 0.655 | 0.319 | 0         | 2.053291536 | spermatogonia | RCN2     |
| CENPH    | 0         | 1.007126089 | 0.602 | 0.15  | 0         | 4.013333333 | spermatogonia | CENPH    |
| PRSS50   | 0         | 1.002496585 | 0.444 | 0.097 | 0         | 4.577319588 | spermatogonia | PRSS50   |
| B2M5     | 2.42E-37  | 3.127936516 | 0.947 | 0.252 | 1.48E-32  | 3.76E+00    | T_cells       | B2M      |
| CCL5     | 0         | 3.112461415 | 0.763 | 0.006 | 0         | 127.1666667 | T_cells       | CCL5     |
| CCL41    | 1.82E-31  | 2.931540681 | 0.5   | 0.063 | 1.12E-26  | 7.94E+00    | T_cells       | CCL4     |
| IL32     | 1.25E-204 | 2.849971491 | 0.763 | 0.023 | 7.65E-200 | 3.32E+01    | T_cells       | IL32     |
| S100A44  | 4.60E-90  | 2.651859632 | 0.763 | 0.053 | 2.82E-85  | 1.44E+01    | T_cells       | S100A4   |
| NKG7     | 0         | 2.569689226 | 0.579 | 0.001 | 0         | 579         | T_cells       | NKG7     |
| TMSB4X5  | 6.97E-31  | 2.505174793 | 0.974 | 0.338 | 4.28E-26  | 2.88E+00    | T_cells       | TMSB4X   |
| GZMA     | 0         | 2.500833935 | 0.632 | 0.001 | 0         | 632         | T_cells       | GZMA     |
| CXCR41   | 6.58E-213 | 2.451229727 | 0.658 | 0.016 | 4.04E-208 | 4.11E+01    | T_cells       | CXCR4    |
| HLA-B2   | 6.07E-24  | 2.450813932 | 0.789 | 0.253 | 3.72E-19  | 3.12E+00    | T_cells       | HLA-B    |
| HLA-C5   | 6.34E-30  | 2.402507709 | 0.763 | 0.177 | 3.89E-25  | 4.31E+00    | T_cells       | HLA-C    |
| HLA-A4   | 8.43E-19  | 2.402281545 | 0.763 | 0.309 | 5.17E-14  | 2.47E+00    | T_cells       | HLA-A    |
| MALAT15  | 5.11E-19  | 2.363279102 | 1     | 0.838 | 3.14E-14  | 1.19E+00    | T_cells       | MALAT1   |
| CD52     | 0         | 2.301475966 | 0.684 | 0.004 | 0         | 171         | T_cells       | CD52     |
| SRGN3    | 2.47E-99  | 2.157558697 | 0.816 | 0.054 | 1.52E-94  | 1.51E+01    | T_cells       | SRGN     |
| CD692    | 0         | 2.124532088 | 0.684 | 0.008 | 0         | 85.5        | T_cells       | CD69     |
| CD3D     | 0         | 2.102635672 | 0.632 | 0.006 | 0         | 105.3333333 | T_cells       | CD3D     |
| CYBA1    | 2.88E-95  | 2.102251138 | 0.684 | 0.04  | 1.77E-90  | 1.71E+01    | T_cells       | CYBA     |
| GZMK     | 1.43E-306 | 2.089078996 | 0.368 | 0.003 | 8.78E-302 | 1.23E+02    | T_cells       | GZMK     |
| TRAC     | 2.02E-36  | 2.051321005 | 0.737 | 0.131 | 1.24E-31  | 5.63E+00    | T_cells       | TRAC     |
| PTPRC1   | 2.01E-209 | 2.02977531  | 0.711 | 0.019 | 1.23E-204 | 3.74E+01    | T_cells       | PTPRC    |
| SH3BGR32 | 3.64E-27  | 1.991738794 | 0.789 | 0.214 | 2.24E-22  | 3.69E+00    | T_cells       | SH3BGR3  |
| RPL105   | 3.67E-23  | 1.978110654 | 0.921 | 0.365 | 2.25E-18  | 2.52E+00    | T_cells       | RPL10    |
| CCL4L21  | 1.57E-29  | 1.965608683 | 0.316 | 0.026 | 9.62E-25  | 1.22E+01    | T_cells       | CCL4L2   |
| CORO1A1  | 0         | 1.953718779 | 0.684 | 0.006 | 0         | 114         | T_cells       | CORO1A   |
| CST7     | 0         | 1.923266112 | 0.658 | 0.001 | 0         | 658         | T_cells       | CST7     |
| XCL2     | 0         | 1.918746763 | 0.211 | 0     | 0         | #DIV/0!     | T_cells       | XCL2     |
| ARL4C1   | 1.24E-121 | 1.918466635 | 0.579 | 0.022 | 7.61E-117 | 2.63E+01    | T_cells       | ARL4C    |
| KLRB1    | 0         | 1.912911661 | 0.368 | 0     | 0         | #DIV/0!     | T_cells       | KLRB1    |
| GZMH     | 0         | 1.894872657 | 0.553 | 0.001 | 0         | 553         | T_cells       | GZMH     |
| KLF65    | 2.27E-18  | 1.891645619 | 0.789 | 0.291 | 1.39E-13  | 2.71E+00    | T_cells       | KLF6     |
| ARHGDB1  | 1.82E-83  | 1.889158055 | 0.632 | 0.039 | 1.12E-78  | 1.62E+01    | T_cells       | ARHGDB   |
| TSC22D35 | 3.31E-29  | 1.888917216 | 0.711 | 0.147 | 2.03E-24  | 4.84E+00    | T_cells       | TSC22D3  |
| CD3E     | 2.03E-223 | 1.836331227 | 0.579 | 0.012 | 1.25E-218 | 4.83E+01    | T_cells       | CD3E     |
| RPL396   | 1.99E-23  | 1.829596079 | 0.868 | 0.282 | 1.22E-18  | 3.08E+00    | T_cells       | RPL39    |
| TNFAIP32 | 1.66E-22  | 1.806902056 | 0.579 | 0.117 | 1.02E-17  | 4.95E+00    | T_cells       | TNFAIP3  |
| HLA-E3   | 5.70E-43  | 1.790127976 | 0.684 | 0.088 | 3.50E-38  | 7.77E+00    | T_cells       | HLA-E    |
| ACTB6    | 8.33E-18  | 1.777603755 | 0.947 | 0.587 | 5.11E-13  | 1.61E+00    | T_cells       | ACTB     |
| TRBC21   | 5.55E-44  | 1.762690812 | 0.474 | 0.041 | 3.40E-39  | 1.16E+01    | T_cells       | TRBC2    |
| ANXA15   | 8.22E-50  | 1.755232064 | 0.711 | 0.082 | 5.04E-45  | 8.67E+00    | T_cells       | ANXA1    |
| JUNB6    | 1.08E-19  | 1.746437116 | 0.895 | 0.349 | 6.65E-15  | 2.56E+00    | T_cells       | JUNB     |
| PFN14    | 1.16E-11  | 1.677720232 | 0.737 | 0.409 | 7.12E-07  | 1.80E+00    | T_cells       | PFN1     |
| HCST1    | 1.71E-161 | 1.644058887 | 0.605 | 0.018 | 1.05E-156 | 3.36E+01    | T_cells       | HCST     |
| LAPTM51  | 4.32E-172 | 1.617072371 | 0.553 | 0.014 | 2.65E-167 | 3.95E+01    | T_cells       | LAPTM5   |
| DUSP23   | 1.31E-42  | 1.585567918 | 0.526 | 0.051 | 8.06E-38  | 1.03E+01    | T_cells       | DUSP2    |
| ZFP36L25 | 1.70E-24  | 1.556278636 | 0.684 | 0.148 | 1.05E-19  | 4.62E+00    | T_cells       | ZFP36L2  |
| EMP34    | 8.22E-26  | 1.543161979 | 0.711 | 0.164 | 5.04E-21  | 4.34E+00    | T_cells       | EMP3     |
| GZMM     | 0         | 1.528044205 | 0.5   | 0.005 | 0         | 100         | T_cells       | GZMM     |
| RPL217   | 4.56E-16  | 1.517661792 | 0.921 | 0.477 | 2.80E-11  | 1.93E+00    | T_cells       | RPL21    |

|           |           |             |       |       |             |             |         |          |
|-----------|-----------|-------------|-------|-------|-------------|-------------|---------|----------|
| IFNG      | 0         | 1.504364458 | 0.368 | 0.001 | 0           | 368         | T_cells | IFNG     |
| CD2       | 1.02E-23  | 1.501039098 | 0.553 | 0.106 | 6.28E-19    | 5.22E+00    | T_cells | CD2      |
| CD48      | 0         | 1.497801254 | 0.632 | 0.008 | 0           | 79          | T_cells | CD48     |
| RPL416    | 8.15E-14  | 1.495896055 | 0.921 | 0.788 | 5.00E-09    | 1.17E+00    | T_cells | RPL41    |
| IL2RG     | 0         | 1.48786343  | 0.474 | 0.003 | 0           | 158         | T_cells | IL2RG    |
| GNLY      | 1.28E-214 | 1.480726354 | 0.184 | 0.001 | 7.83E-210   | 1.84E+02    | T_cells | GNLY     |
| RPL13A6   | 3.65E-18  | 1.468031727 | 1     | 0.737 | 2.24E-13    | 1.36E+00    | T_cells | RPL13A   |
| MYL12A4   | 2.42E-13  | 1.456235792 | 0.711 | 0.328 | 1.49E-08    | 2.17E+00    | T_cells | MYL12A   |
| CD742     | 1.97E-20  | 1.434664193 | 0.474 | 0.079 | 1.21E-15    | 6.00E+00    | T_cells | CD74     |
| LTB       | 1.74E-277 | 1.432012015 | 0.421 | 0.005 | 1.06E-272   | 8.42E+01    | T_cells | LTB      |
| RPS266    | 4.34E-10  | 1.412569382 | 0.789 | 0.538 | 2.66E-05    | 1.47E+00    | T_cells | RPS26    |
| RPL18A7   | 1.56E-11  | 1.40165442  | 0.789 | 0.418 | 9.59E-07    | 1.89E+00    | T_cells | RPL18A   |
| TMSB105   | 1.18E-19  | 1.400185494 | 0.921 | 0.398 | 7.22E-15    | 2.31E+00    | T_cells | TMSB10   |
| RPL27A6   | 9.07E-15  | 1.394399084 | 0.921 | 0.787 | 5.56E-10    | 1.17E+00    | T_cells | RPL27A   |
| BTG15     | 1.83E-10  | 1.382029935 | 0.789 | 0.611 | 1.12E-05    | 1.29E+00    | T_cells | BTG1     |
| CD3G      | 1.19E-294 | 1.379714706 | 0.526 | 0.007 | 7.30E-290   | 7.51E+01    | T_cells | CD3G     |
| RPL145    | 6.57E-13  | 1.379033981 | 0.868 | 0.646 | 4.03E-08    | 1.34E+00    | T_cells | RPL14    |
| PPP1R15A6 | 1.91E-17  | 1.378753511 | 0.684 | 0.197 | 1.17E-12    | 3.47E+00    | T_cells | PPP1R15A |
| CLIC15    | 9.94E-07  | 1.378316125 | 0.5   | 0.265 | 0.060958577 | 1.886792453 | T_cells | CLIC1    |
| ARPC1B3   | 1.08E-30  | 1.373961659 | 0.553 | 0.078 | 6.64E-26    | 7.09E+00    | T_cells | ARPC1B   |
| ID23      | 1.53E-14  | 1.370770956 | 0.5   | 0.125 | 9.39E-10    | 4.00E+00    | T_cells | ID2      |
| RPL283    | 1.38E-13  | 1.352707575 | 0.895 | 0.823 | 8.48E-09    | 1.09E+00    | T_cells | RPL28    |
| MSN3      | 1.05E-30  | 1.351720793 | 0.526 | 0.071 | 6.41E-26    | 7.41E+00    | T_cells | MSN      |
| XCL1      | 6.18E-68  | 1.349978567 | 0.184 | 0.004 | 3.79E-63    | 4.60E+01    | T_cells | XCL1     |
| GMFG1     | 6.57E-35  | 1.345516303 | 0.553 | 0.071 | 4.03E-30    | 7.79E+00    | T_cells | GMFG     |
| NR4A22    | 7.40E-11  | 1.337340606 | 0.474 | 0.151 | 4.54E-06    | 3.14E+00    | T_cells | NR4A2    |
| FYB1      | 4.47E-33  | 1.334323851 | 0.526 | 0.067 | 2.74E-28    | 7.85E+00    | T_cells | FYB      |
| CD442     | 2.93E-15  | 1.331672981 | 0.447 | 0.099 | 1.80E-10    | 4.52E+00    | T_cells | CD44     |
| RPS196    | 3.89E-12  | 1.328646159 | 0.895 | 0.759 | 2.39E-07    | 1.18E+00    | T_cells | RPS19    |
| RPS220    | 4.54E-14  | 1.325915503 | 0.921 | 0.677 | 2.79E-09    | 1.36E+00    | T_cells | RPS2     |
| RPS36     | 5.75E-13  | 1.323831416 | 0.895 | 0.8   | 3.53E-08    | 1.12E+00    | T_cells | RPS3     |
| CD531     | 0         | 1.319877497 | 0.5   | 0.005 | 0           | 100         | T_cells | CD53     |
| FXD52     | 1.81E-68  | 1.294808474 | 0.474 | 0.026 | 1.11E-63    | 1.82E+01    | T_cells | FXD5     |
| STK4      | 2.64E-13  | 1.286063809 | 0.579 | 0.201 | 1.62E-08    | 2.88E+00    | T_cells | STK4     |
| RPS285    | 1.75E-09  | 1.285046059 | 0.789 | 0.61  | 0.000107272 | 1.293442623 | T_cells | RPS28    |
| MT-CYB6   | 6.75E-12  | 1.281276348 | 0.816 | 0.398 | 4.14E-07    | 2.05E+00    | T_cells | MT-CYB   |
| S100A65   | 4.17E-31  | 1.275479922 | 0.763 | 0.133 | 2.56E-26    | 5.74E+00    | T_cells | S100A6   |
| RPS146    | 7.30E-13  | 1.272070694 | 0.921 | 0.831 | 4.48E-08    | 1.11E+00    | T_cells | RPS14    |
| RPS4X6    | 8.88E-16  | 1.27201358  | 0.868 | 0.349 | 5.45E-11    | 2.49E+00    | T_cells | RPS4X    |
| ALOX5AP1  | 6.51E-51  | 1.26351435  | 0.395 | 0.024 | 3.99E-46    | 1.65E+01    | T_cells | ALOX5AP  |
| CTSW      | 4.34E-202 | 1.262777086 | 0.395 | 0.006 | 2.66E-197   | 6.58E+01    | T_cells | CTSW     |
| LCP12     | 6.35E-11  | 1.258957818 | 0.632 | 0.289 | 3.89E-06    | 2.19E+00    | T_cells | LCP1     |
| IDS3      | 1.10E-24  | 1.255607394 | 0.474 | 0.071 | 6.77E-20    | 6.68E+00    | T_cells | IDS      |
| ITGB21    | 7.06E-167 | 1.252912699 | 0.447 | 0.009 | 4.33E-162   | 4.97E+01    | T_cells | ITGB2    |
| MT-ATP66  | 2.93E-10  | 1.252203414 | 0.789 | 0.435 | 1.79E-05    | 1.81E+00    | T_cells | MT-ATP6  |
| RPS272    | 8.67E-09  | 1.250778346 | 0.921 | 0.823 | 0.000532164 | 1.119076549 | T_cells | RPS27    |
| RPS15A3   | 6.67E-14  | 1.246155998 | 0.947 | 0.786 | 4.09E-09    | 1.20E+00    | T_cells | RPS15A   |
| RPL23A4   | 4.15E-13  | 1.242524977 | 0.921 | 0.737 | 2.55E-08    | 1.25E+00    | T_cells | RPL23A   |
| DUSP16    | 1.97E-13  | 1.240001975 | 0.605 | 0.186 | 1.21E-08    | 3.25E+00    | T_cells | DUSP1    |
| CYTIP1    | 4.19E-150 | 1.236364779 | 0.526 | 0.014 | 2.57E-145   | 3.76E+01    | T_cells | CYTIP    |
| IFITM25   | 1.99E-14  | 1.228905612 | 0.579 | 0.165 | 1.22E-09    | 3.51E+00    | T_cells | IFITM2   |
| RPL186    | 9.57E-12  | 1.204897137 | 0.868 | 0.573 | 5.87E-07    | 1.51E+00    | T_cells | RPL18    |
| RPS186    | 1.84E-12  | 1.202952299 | 0.921 | 0.853 | 1.13E-07    | 1.08E+00    | T_cells | RPS18    |
| CFL13     | 3.29E-09  | 1.194860611 | 0.816 | 0.737 | 0.000201761 | 1.107191316 | T_cells | CFL1     |
| RPLP16    | 8.69E-13  | 1.186660214 | 0.947 | 0.766 | 5.33E-08    | 1.24E+00    | T_cells | RPLP1    |
| NFKBIA6   | 4.51E-10  | 1.178935348 | 0.579 | 0.214 | 2.77E-05    | 2.71E+00    | T_cells | NFKBIA   |
| HLA-F1    | 1.98E-31  | 1.171844426 | 0.474 | 0.057 | 1.21E-26    | 8.32E+00    | T_cells | HLA-F    |
| MT-CO25   | 6.73E-11  | 1.166591976 | 0.816 | 0.436 | 4.13E-06    | 1.87E+00    | T_cells | MT-CO2   |
| MT-CO16   | 8.77E-11  | 1.160332997 | 0.816 | 0.453 | 5.38E-06    | 1.80E+00    | T_cells | MT-CO1   |
| RPS27A5   | 5.41E-11  | 1.159704956 | 0.895 | 0.861 | 3.32E-06    | 1.04E+00    | T_cells | RPS27A   |
| RPS293    | 8.28E-16  | 1.158075908 | 0.947 | 0.886 | 5.08E-11    | 1.07E+00    | T_cells | RPS29    |
| TRGC2     | 2.46E-22  | 1.154485228 | 0.289 | 0.029 | 1.51E-17    | 9.97E+00    | T_cells | TRGC2    |
| RAC22     | 2.52E-274 | 1.150653777 | 0.421 | 0.005 | 1.54E-269   | 8.42E+01    | T_cells | RAC2     |
| PRF1      | 0         | 1.14859051  | 0.368 | 0     | 0           | #DIV/0!     | T_cells | PRF1     |
| RPL115    | 1.06E-13  | 1.14537865  | 0.947 | 0.826 | 6.50E-09    | 1.15E+00    | T_cells | RPL11    |
| ITM2A3    | 3.83E-26  | 1.135321999 | 0.526 | 0.078 | 2.35E-21    | 6.74E+00    | T_cells | ITM2A    |
| RPL65     | 1.72E-12  | 1.134489377 | 0.895 | 0.684 | 1.06E-07    | 1.31E+00    | T_cells | RPL6     |
| MT-ND54   | 4.08E-12  | 1.12546542  | 0.763 | 0.297 | 2.50E-07    | 2.57E+00    | T_cells | MT-ND5   |
| RSRP11    | 7.31E-08  | 1.124193705 | 0.553 | 0.282 | 0.004481985 | 1.960992908 | T_cells | RSRP1    |
| GPR1831   | 3.86E-45  | 1.107271701 | 0.289 | 0.014 | 2.37E-40    | 2.06E+01    | T_cells | GPR183   |
| ICAM3     | 2.34E-15  | 1.107108716 | 0.395 | 0.078 | 1.43E-10    | 5.06E+00    | T_cells | ICAM3    |
| EEF1A16   | 2.55E-15  | 1.105122166 | 0.974 | 0.925 | 1.56E-10    | 1.05E+00    | T_cells | EEF1A1   |
| TXNIP4    | 1.94E-11  | 1.103300395 | 0.553 | 0.174 | 1.19E-06    | 3.18E+00    | T_cells | TXNIP    |
| RPL265    | 1.04E-11  | 1.100397856 | 0.895 | 0.755 | 6.40E-07    | 1.19E+00    | T_cells | RPL26    |
| GPSM31    | 4.77E-40  | 1.098674797 | 0.368 | 0.027 | 2.93E-35    | 1.36E+01    | T_cells | GPSM3    |

|           |             |             |       |       |             |             |           |          |
|-----------|-------------|-------------|-------|-------|-------------|-------------|-----------|----------|
| RPL306    | 4.69E-15    | 1.092321233 | 0.947 | 0.879 | 2.87E-10    | 1.08E+00    | T_cells   | RPL30    |
| RPL125    | 5.08E-09    | 1.091666505 | 0.816 | 0.635 | 0.000311604 | 1.28503937  | T_cells   | RPL12    |
| SLC2A33   | 5.81E-12    | 1.082967705 | 0.395 | 0.093 | 3.56E-07    | 4.25E+00    | T_cells   | SLC2A3   |
| MT-ND16   | 1.18E-09    | 1.061143185 | 0.789 | 0.411 | 7.27E-05    | 1.92E+00    | T_cells   | MT-ND1   |
| RPL10A5   | 6.84E-11    | 1.054208494 | 0.868 | 0.663 | 4.20E-06    | 1.31E+00    | T_cells   | RPL10A   |
| IL7R      | 1.60E-69    | 1.043591784 | 0.237 | 0.006 | 9.84E-65    | 3.95E+01    | T_cells   | IL7R     |
| RPS155    | 3.56E-10    | 1.043189129 | 0.895 | 0.766 | 2.18E-05    | 1.17E+00    | T_cells   | RPS15    |
| RPS85     | 3.63E-10    | 1.037475108 | 0.868 | 0.776 | 2.23E-05    | 1.12E+00    | T_cells   | RPS8     |
| RGS101    | 1.04E-23    | 1.037099479 | 0.316 | 0.033 | 6.41E-19    | 9.58E+00    | T_cells   | RGS10    |
| GLIPR11   | 2.73E-05    | 1.029972478 | 0.316 | 0.125 | 1           | 2.528       | T_cells   | GLIPR1   |
| ARL6IP55  | 2.30E-08    | 1.029876999 | 0.5   | 0.205 | 0.001409505 | 2.43902439  | T_cells   | ARL6IP5  |
| COTL11    | 1.35E-09    | 1.029777235 | 0.342 | 0.086 | 8.28E-05    | 3.98E+00    | T_cells   | COTL1    |
| LEPROTL1  | 0.004685222 | 1.028536319 | 0.5   | 0.435 | 1           | 1.149425287 | T_cells   | LEPROTL1 |
| CALM14    | 1.30E-06    | 1.026986507 | 0.737 | 0.693 | 0.079618984 | 1.063492063 | T_cells   | CALM1    |
| RPL194    | 3.15E-11    | 1.025814503 | 0.921 | 0.839 | 1.93E-06    | 1.10E+00    | T_cells   | RPL19    |
| ADGRE51   | 2.01E-34    | 1.024978124 | 0.316 | 0.023 | 1.23E-29    | 1.37E+01    | T_cells   | ADGRE5   |
| MT-CO34   | 1.02E-09    | 1.023247521 | 0.816 | 0.47  | 6.25E-05    | 1.74E+00    | T_cells   | MT-CO3   |
| LSP12     | 2.47E-33    | 1.022479894 | 0.368 | 0.031 | 1.52E-28    | 1.19E+01    | T_cells   | LSP1     |
| HCLS11    | 5.37E-92    | 1.020180489 | 0.395 | 0.013 | 3.30E-87    | 3.04E+01    | T_cells   | HCLS1    |
| RPS165    | 1.52E-09    | 1.0174571   | 0.842 | 0.757 | 9.34E-05    | 1.11E+00    | T_cells   | RPS16    |
| LY6E3     | 1.92E-07    | 1.0165921   | 0.368 | 0.119 | 0.011757004 | 3.092436975 | T_cells   | LY6E     |
| RPLP21    | 5.45E-10    | 1.016155388 | 0.947 | 0.835 | 3.34E-05    | 1.13E+00    | T_cells   | RPLP2    |
| LCK       | 1.85E-85    | 1.01233322  | 0.289 | 0.008 | 1.13E-80    | 3.61E+01    | T_cells   | LCK      |
| MT-ND36   | 4.47E-10    | 1.002094498 | 0.789 | 0.375 | 2.74E-05    | 2.10E+00    | T_cells   | MT-ND3   |
| TAGLN1    | 0           | 3.6510815   | 0.941 | 0.129 | 0           | 7.294573643 | VSM_cells | TAGLN    |
| ADIRF2    | 0           | 3.248291087 | 0.877 | 0.118 | 0           | 7.43220339  | VSM_cells | ADIRF    |
| TPM21     | 0           | 2.99208043  | 0.909 | 0.137 | 0           | 6.635036496 | VSM_cells | TPM2     |
| MYH111    | 0           | 2.686007961 | 0.937 | 0.184 | 0           | 5.092391304 | VSM_cells | MYH11    |
| ACTA21    | 0           | 2.662911479 | 0.924 | 0.174 | 0           | 5.310344828 | VSM_cells | ACTA2    |
| GADD45B4  | 0           | 2.618912838 | 0.848 | 0.181 | 0           | 4.685082873 | VSM_cells | GADD45B  |
| MYL91     | 0           | 2.486523818 | 0.905 | 0.15  | 0           | 6.033333333 | VSM_cells | MYL9     |
| VIM4      | 1.40E-261   | 2.42576747  | 0.943 | 0.444 | 8.58E-257   | 2.12E+00    | VSM_cells | VIM      |
| CALD12    | 0           | 2.42188149  | 0.937 | 0.227 | 0           | 4.127753304 | VSM_cells | CALD1    |
| C11orf962 | 0           | 2.396933686 | 0.871 | 0.266 | 0           | 3.27443609  | VSM_cells | C11orf96 |
| IGFBP52   | 0           | 2.326690954 | 0.751 | 0.06  | 0           | 12.51666667 | VSM_cells | IGFBP5   |
| FLNA2     | 0           | 2.282760011 | 0.856 | 0.106 | 0           | 8.075471698 | VSM_cells | FLNA     |
| RERGL     | 0           | 2.273889949 | 0.715 | 0.013 | 0           | 55          | VSM_cells | RERGL    |
| MALAT14   | 1.04E-173   | 2.246974741 | 0.953 | 0.836 | 6.37E-169   | 1.14E+00    | VSM_cells | MALAT1   |
| DSTN1     | 3.21E-224   | 2.246848528 | 0.909 | 0.555 | 1.97E-219   | 1.64E+00    | VSM_cells | DSTN     |
| IER24     | 0           | 2.246074872 | 0.841 | 0.168 | 0           | 5.005952381 | VSM_cells | IER2     |
| RGS5      | 2.42E-140   | 2.175761577 | 0.467 | 0.123 | 1.48E-135   | 3.80E+00    | VSM_cells | RGS5     |
| MT2A3     | 1.90E-298   | 2.153642436 | 0.82  | 0.222 | 1.17E-293   | 3.69E+00    | VSM_cells | MT2A     |
| RGS162    | 0           | 2.108192889 | 0.457 | 0.051 | 0           | 8.960784314 | VSM_cells | RGS16    |
| MCAM      | 0           | 2.099309356 | 0.799 | 0.028 | 0           | 28.53571429 | VSM_cells | MCAM     |
| TPM11     | 0           | 1.97354633  | 0.833 | 0.195 | 0           | 4.271794872 | VSM_cells | TPM1     |
| RPL104    | 5.56E-256   | 1.950458101 | 0.92  | 0.356 | 3.41E-251   | 2.58E+00    | VSM_cells | RPL10    |
| MT-ATP64  | 5.46E-217   | 1.942218328 | 0.907 | 0.426 | 3.35E-212   | 2.13E+00    | VSM_cells | MT-ATP6  |
| RRAD      | 0           | 1.939779    | 0.693 | 0.049 | 0           | 14.14285714 | VSM_cells | RRAD     |
| SPARCL13  | 0           | 1.931795612 | 0.909 | 0.154 | 0           | 5.902597403 | VSM_cells | SPARCL1  |
| MT-ND14   | 1.23E-229   | 1.912284018 | 0.903 | 0.402 | 7.53E-225   | 2.25E+00    | VSM_cells | MT-ND1   |
| S100A64   | 0           | 1.893277911 | 0.708 | 0.123 | 0           | 5.756097561 | VSM_cells | S100A6   |
| PLN       | 0           | 1.870307559 | 0.759 | 0.176 | 0           | 4.3125      | VSM_cells | PLN      |
| MT-CYB4   | 4.36E-222   | 1.844598538 | 0.901 | 0.389 | 2.67E-217   | 2.32E+00    | VSM_cells | MT-CYB   |
| KLF24     | 0           | 1.843926231 | 0.782 | 0.158 | 0           | 4.949367089 | VSM_cells | KLF2     |
| MFGE81    | 0           | 1.811727984 | 0.82  | 0.08  | 0           | 10.25       | VSM_cells | MFGE8    |
| MT1E1     | 0           | 1.786292698 | 0.655 | 0.057 | 0           | 11.49122807 | VSM_cells | MT1E     |
| FOS4      | 5.79E-248   | 1.785533705 | 0.886 | 0.303 | 3.55E-243   | 2.92E+00    | VSM_cells | FOS      |
| MYL63     | 2.02E-191   | 1.77227303  | 0.911 | 0.661 | 1.24E-186   | 1.38E+00    | VSM_cells | MYL6     |
| ATF34     | 0           | 1.77145526  | 0.746 | 0.108 | 0           | 6.907407407 | VSM_cells | ATF3     |
| JUNB4     | 6.65E-234   | 1.761869585 | 0.888 | 0.34  | 4.08E-229   | 2.61E+00    | VSM_cells | JUNB     |
| CCL23     | 0           | 1.760798856 | 0.469 | 0.039 | 0           | 12.02564103 | VSM_cells | CCL2     |
| MT-ND34   | 1.19E-225   | 1.729594348 | 0.896 | 0.366 | 7.27E-221   | 2.45E+00    | VSM_cells | MT-ND3   |
| MT-ND53   | 4.85E-259   | 1.715428962 | 0.877 | 0.287 | 2.98E-254   | 3.06E+00    | VSM_cells | MT-ND5   |
| 04-Jun    | 3.74E-209   | 1.707128986 | 0.882 | 0.362 | 2.29E-204   | 2.44E+00    | VSM_cells | JUN      |
| SELM3     | 1.20E-284   | 1.691482505 | 0.776 | 0.208 | 7.38E-280   | 3.73E+00    | VSM_cells | SELM     |
| MT1M1     | 0           | 1.67288586  | 0.666 | 0.025 | 0           | 26.64       | VSM_cells | MT1M     |
| RHOB4     | 6.45E-270   | 1.672568679 | 0.822 | 0.231 | 3.95E-265   | 3.56E+00    | VSM_cells | RHOB     |
| LBH       | 0           | 1.670013068 | 0.708 | 0.09  | 0           | 7.866666667 | VSM_cells | LBH      |
| ZFP364    | 3.05E-296   | 1.654008261 | 0.863 | 0.233 | 1.87E-291   | 3.70E+00    | VSM_cells | ZFP36    |
| MT-ND24   | 1.11E-215   | 1.635799339 | 0.905 | 0.404 | 6.82E-211   | 2.24E+00    | VSM_cells | MT-ND2   |
| LGALS12   | 0           | 1.603074074 | 0.839 | 0.197 | 0           | 4.258883249 | VSM_cells | LGALS1   |
| MT-ND44   | 7.99E-203   | 1.598543694 | 0.905 | 0.41  | 4.90E-198   | 2.21E+00    | VSM_cells | MT-ND4   |
| CSRP11    | 0           | 1.592800308 | 0.744 | 0.106 | 0           | 7.018867925 | VSM_cells | CSRP1    |
| SNCG1     | 0           | 1.587402931 | 0.611 | 0.025 | 0           | 24.44       | VSM_cells | SNCG     |
| IGFBP73   | 3.59E-287   | 1.582479946 | 0.928 | 0.276 | 2.20E-282   | 3.36E+00    | VSM_cells | IGFBP7   |

|            |           |             |       |       |           |             |           |            |
|------------|-----------|-------------|-------|-------|-----------|-------------|-----------|------------|
| CAV13      | 0         | 1.539492586 | 0.801 | 0.094 | 0         | 8.521276596 | VSM_cells | CAV1       |
| MT-CO14    | 3.32E-190 | 1.533203665 | 0.905 | 0.445 | 2.03E-185 | 2.03E+00    | VSM_cells | MT-CO1     |
| HSPB13     | 1.22E-270 | 1.526678344 | 0.803 | 0.212 | 7.45E-266 | 3.79E+00    | VSM_cells | HSPB1      |
| MYLK1      | 0         | 1.515664617 | 0.822 | 0.186 | 0         | 4.419354839 | VSM_cells | MYLK       |
| TMSB4X4    | 4.20E-229 | 1.509917426 | 0.886 | 0.329 | 2.58E-224 | 2.69E+00    | VSM_cells | TMSB4X     |
| BGN1       | 0         | 1.50937704  | 0.687 | 0.081 | 0         | 8.481481481 | VSM_cells | BGN        |
| MT-CO32    | 1.07E-182 | 1.505875222 | 0.907 | 0.462 | 6.58E-178 | 1.96E+00    | VSM_cells | MT-CO3     |
| LMOD11     | 0         | 1.493219633 | 0.693 | 0.046 | 0         | 15.06521739 | VSM_cells | LMOD1      |
| C10orf101  | 0         | 1.471562742 | 0.452 | 0.037 | 0         | 12.21621622 | VSM_cells | C10orf10   |
| TIMP33     | 0         | 1.444683249 | 0.841 | 0.165 | 0         | 5.096969697 | VSM_cells | TIMP3      |
| MGST32     | 2.11E-264 | 1.439959248 | 0.812 | 0.228 | 1.29E-259 | 3.56E+00    | VSM_cells | MGST3      |
| TINAGL11   | 0         | 1.4295101   | 0.662 | 0.013 | 0         | 50.92307692 | VSM_cells | TINAGL1    |
| RPL144     | 8.32E-147 | 1.425716837 | 0.865 | 0.642 | 5.11E-142 | 1.35E+00    | VSM_cells | RPL14      |
| DES        | 1.96E-265 | 1.420700284 | 0.524 | 0.084 | 1.20E-260 | 6.24E+00    | VSM_cells | DES        |
| ID32       | 0         | 1.416443405 | 0.567 | 0.038 | 0         | 14.92105263 | VSM_cells | ID3        |
| RPS4X4     | 1.63E-195 | 1.381236901 | 0.869 | 0.34  | 1.00E-190 | 2.56E+00    | VSM_cells | RPS4X      |
| NOTCH3     | 0         | 1.379725307 | 0.668 | 0.018 | 0         | 37.11111111 | VSM_cells | NOTCH3     |
| BTG24      | 1.23E-269 | 1.37294359  | 0.649 | 0.123 | 7.52E-265 | 5.28E+00    | VSM_cells | BTG2       |
| RPL184     | 5.38E-152 | 1.36810521  | 0.888 | 0.568 | 3.30E-147 | 1.56E+00    | VSM_cells | RPL18      |
| ACTB4      | 1.66E-162 | 1.366845273 | 0.905 | 0.581 | 1.02E-157 | 1.56E+00    | VSM_cells | ACTB       |
| CTGF2      | 3.62E-228 | 1.363185346 | 0.442 | 0.066 | 2.22E-223 | 6.70E+00    | VSM_cells | CTGF       |
| PTRF3      | 0         | 1.358473814 | 0.772 | 0.109 | 0         | 7.082568807 | VSM_cells | PTRF       |
| PTMA4      | 1.92E-167 | 1.356637446 | 0.924 | 0.652 | 1.18E-162 | 1.42E+00    | VSM_cells | PTMA       |
| RPLP14     | 1.54E-143 | 1.348521921 | 0.924 | 0.764 | 9.45E-139 | 1.21E+00    | VSM_cells | RPLP1      |
| SORBS2     | 0         | 1.342233682 | 0.617 | 0.028 | 0         | 22.03571429 | VSM_cells | SORBS2     |
| CD92       | 0         | 1.338313563 | 0.698 | 0.084 | 0         | 8.30952381  | VSM_cells | CD9        |
| NEAT14     | 5.28E-239 | 1.332646518 | 0.755 | 0.187 | 3.24E-234 | 4.04E+00    | VSM_cells | NEAT1      |
| EGR14      | 2.40E-217 | 1.325550068 | 0.814 | 0.254 | 1.47E-212 | 3.20E+00    | VSM_cells | EGR1       |
| MT-CO23    | 2.44E-173 | 1.324593726 | 0.903 | 0.428 | 1.49E-168 | 2.11E+00    | VSM_cells | MT-CO2     |
| SOD3       | 1.83E-195 | 1.324129    | 0.767 | 0.289 | 1.12E-190 | 2.65E+00    | VSM_cells | SOD3       |
| RPL10A4    | 2.95E-151 | 1.321086945 | 0.894 | 0.659 | 1.81E-146 | 1.36E+00    | VSM_cells | RPL10A     |
| RPL18A5    | 3.83E-157 | 1.319566143 | 0.85  | 0.41  | 2.35E-152 | 2.07E+00    | VSM_cells | RPL18A     |
| COL18A12   | 0         | 1.277780872 | 0.609 | 0.075 | 0         | 8.12        | VSM_cells | COL18A1    |
| NEXN1      | 0         | 1.258423458 | 0.632 | 0.105 | 0         | 6.019047619 | VSM_cells | NEXN       |
| TNS12      | 0         | 1.246947843 | 0.751 | 0.095 | 0         | 7.905263158 | VSM_cells | TNS1       |
| CD1512     | 0         | 1.24420552  | 0.66  | 0.094 | 0         | 7.021276596 | VSM_cells | CD151      |
| PPP1R14A2  | 4.18E-289 | 1.241178755 | 0.717 | 0.142 | 2.57E-284 | 5.05E+00    | VSM_cells | PPP1R14A   |
| GSTP14     | 6.70E-286 | 1.23242629  | 0.763 | 0.164 | 4.11E-281 | 4.65E+00    | VSM_cells | GSTP1      |
| RPL215     | 5.49E-163 | 1.232247051 | 0.903 | 0.47  | 3.37E-158 | 1.92E+00    | VSM_cells | RPL21      |
| BCAM1      | 0         | 1.232133082 | 0.649 | 0.051 | 0         | 12.7254902  | VSM_cells | BCAM       |
| FAM129A1   | 0         | 1.230336991 | 0.63  | 0.018 | 0         | 35          | VSM_cells | FAM129A    |
| RCAN2      | 1.69E-270 | 1.224882466 | 0.664 | 0.147 | 1.04E-265 | 4.52E+00    | VSM_cells | RCAN2      |
| EEF1A14    | 2.62E-158 | 1.222939536 | 0.966 | 0.924 | 1.61E-153 | 1.05E+00    | VSM_cells | EEF1A1     |
| HES4       | 0         | 1.219937221 | 0.605 | 0.032 | 0         | 18.90625    | VSM_cells | HES4       |
| CCND11     | 0         | 1.215994871 | 0.529 | 0.043 | 0         | 12.30232558 | VSM_cells | CCND1      |
| PPP1R12B   | 6.40E-226 | 1.208954869 | 0.655 | 0.168 | 3.93E-221 | 3.90E+00    | VSM_cells | PPP1R12B   |
| AC013461.1 | 2.16E-216 | 1.203757591 | 0.66  | 0.172 | 1.32E-211 | 3.84E+00    | VSM_cells | AC013461.1 |
| CRYAB1     | 3.65E-270 | 1.199983247 | 0.605 | 0.116 | 2.24E-265 | 5.22E+00    | VSM_cells | CRYAB      |
| FXYD12     | 0         | 1.197076002 | 0.632 | 0.044 | 0         | 14.36363636 | VSM_cells | FXYD1      |
| ZFH31      | 0         | 1.196508471 | 0.613 | 0.081 | 0         | 7.567901235 | VSM_cells | ZFH3       |
| JAG11      | 0         | 1.195251288 | 0.588 | 0.042 | 0         | 14          | VSM_cells | JAG1       |
| ACTN41     | 3.38E-235 | 1.191879921 | 0.655 | 0.155 | 2.07E-230 | 4.23E+00    | VSM_cells | ACTN4      |
| AHNAK4     | 1.54E-281 | 1.1877623   | 0.753 | 0.162 | 9.45E-277 | 4.65E+00    | VSM_cells | AHNAK      |
| NDUFA4L2   | 1.43E-226 | 1.184287472 | 0.368 | 0.048 | 8.78E-222 | 7.67E+00    | VSM_cells | NDUFA4L2   |
| NDUFA41    | 1.38E-128 | 1.180068949 | 0.827 | 0.521 | 8.45E-124 | 1.59E+00    | VSM_cells | NDUFA4     |
| NET1       | 3.46E-207 | 1.180000092 | 0.575 | 0.132 | 2.12E-202 | 4.36E+00    | VSM_cells | NET1       |
| ITGB12     | 2.14E-238 | 1.171453281 | 0.784 | 0.206 | 1.31E-233 | 3.81E+00    | VSM_cells | ITGB1      |
| B2M4       | 1.81E-278 | 1.169560139 | 0.899 | 0.241 | 1.11E-273 | 3.73E+00    | VSM_cells | B2M        |
| RPS84      | 5.10E-129 | 1.161458988 | 0.896 | 0.774 | 3.13E-124 | 1.16E+00    | VSM_cells | RPS8       |
| IRF14      | 1.00E-136 | 1.160449795 | 0.63  | 0.216 | 6.16E-132 | 2.92E+00    | VSM_cells | IRF1       |
| PTMS3      | 7.98E-247 | 1.158769228 | 0.786 | 0.204 | 4.89E-242 | 3.85E+00    | VSM_cells | PTMS       |
| GUCY1A3    | 0         | 1.155514646 | 0.575 | 0.008 | 0         | 71.875      | VSM_cells | GUCY1A3    |
| RPL64      | 1.70E-127 | 1.153207381 | 0.875 | 0.681 | 1.04E-122 | 1.28E+00    | VSM_cells | RPL6       |
| OGN2       | 4.60E-227 | 1.15111707  | 0.465 | 0.072 | 2.82E-222 | 6.46E+00    | VSM_cells | OGN        |
| SOCS34     | 8.01E-294 | 1.144648977 | 0.666 | 0.117 | 4.92E-289 | 5.69E+00    | VSM_cells | SOCS3      |
| NR2F23     | 9.59E-261 | 1.139787009 | 0.729 | 0.16  | 5.89E-256 | 4.56E+00    | VSM_cells | NR2F2      |
| ITGA8      | 0         | 1.135196677 | 0.564 | 0.004 | 0         | 141         | VSM_cells | ITGA8      |
| CRIM11     | 0         | 1.12687282  | 0.59  | 0.042 | 0         | 14.04761905 | VSM_cells | CRIM1      |
| MT-ND4L2   | 5.94E-225 | 1.121773447 | 0.715 | 0.176 | 3.65E-220 | 4.06E+00    | VSM_cells | MT-ND4L    |
| SLIT3      | 0         | 1.120347206 | 0.577 | 0.082 | 0         | 7.036585366 | VSM_cells | SLIT3      |
| ID4        | 2.73E-216 | 1.116524662 | 0.514 | 0.092 | 1.68E-211 | 5.59E+00    | VSM_cells | ID4        |
| CDKN1A3    | 4.48E-224 | 1.116099868 | 0.6   | 0.122 | 2.75E-219 | 4.92E+00    | VSM_cells | CDKN1A     |
| SH3BGR5    | 0         | 1.11067493  | 0.67  | 0.103 | 0         | 6.504854369 | VSM_cells | SH3BGR     |
| SYNPO21    | 0         | 1.104246504 | 0.598 | 0.051 | 0         | 11.7254902  | VSM_cells | SYNPO2     |
| SLC25A64   | 6.95E-242 | 1.10254489  | 0.755 | 0.186 | 4.26E-237 | 4.06E+00    | VSM_cells | SLC25A6    |

|           |           |             |       |       |           |             |           |          |
|-----------|-----------|-------------|-------|-------|-----------|-------------|-----------|----------|
| SEPW11    | 1.69E-126 | 1.097504363 | 0.812 | 0.53  | 1.04E-121 | 1.53E+00    | VSM_cells | SEPW1    |
| KLF64     | 3.84E-167 | 1.097205163 | 0.759 | 0.283 | 2.36E-162 | 2.68E+00    | VSM_cells | KLF6     |
| RPS144    | 6.67E-138 | 1.096072503 | 0.941 | 0.829 | 4.09E-133 | 1.14E+00    | VSM_cells | RPS14    |
| CD634     | 1.92E-183 | 1.094631106 | 0.82  | 0.283 | 1.18E-178 | 2.90E+00    | VSM_cells | CD63     |
| NR4A13    | 2.32E-149 | 1.082498431 | 0.706 | 0.254 | 1.42E-144 | 2.78E+00    | VSM_cells | NR4A1    |
| ADAMTS13  | 5.72E-262 | 1.082095574 | 0.537 | 0.083 | 3.51E-257 | 6.47E+00    | VSM_cells | ADAMTS1  |
| TBX2      | 0         | 1.080376078 | 0.497 | 0.027 | 0         | 18.40740741 | VSM_cells | TBX2     |
| CRIP1     | 0         | 1.078837251 | 0.524 | 0.014 | 0         | 37.42857143 | VSM_cells | CRIP1    |
| CSRP2     | 2.77E-111 | 1.072080235 | 0.63  | 0.279 | 1.70E-106 | 2.26E+00    | VSM_cells | CSRP2    |
| PNRC14    | 1.60E-135 | 1.069628763 | 0.793 | 0.391 | 9.79E-131 | 2.03E+00    | VSM_cells | PNRC1    |
| MEF2C2    | 2.58E-219 | 1.058432719 | 0.619 | 0.147 | 1.58E-214 | 4.21E+00    | VSM_cells | MEF2C    |
| A2M2      | 3.32E-307 | 1.055802396 | 0.634 | 0.105 | 2.04E-302 | 6.04E+00    | VSM_cells | A2M      |
| RPL27A4   | 6.42E-123 | 1.051687049 | 0.89  | 0.785 | 3.94E-118 | 1.13E+00    | VSM_cells | RPL27A   |
| MSRB31    | 0         | 1.049305378 | 0.571 | 0.073 | 0         | 7.821917808 | VSM_cells | MSRB3    |
| CYR612    | 5.39E-237 | 1.044637345 | 0.588 | 0.109 | 3.31E-232 | 5.39E+00    | VSM_cells | CYR61    |
| RPS27A4   | 2.36E-131 | 1.044309363 | 0.926 | 0.86  | 1.45E-126 | 1.08E+00    | VSM_cells | RPS27A   |
| FN12      | 1.91E-195 | 1.041741419 | 0.457 | 0.079 | 1.17E-190 | 5.78E+00    | VSM_cells | FN1      |
| FOXC12    | 0         | 1.041595094 | 0.531 | 0.065 | 0         | 8.169230769 | VSM_cells | FOXC1    |
| RPL13A4   | 7.58E-118 | 1.040514976 | 0.892 | 0.735 | 4.65E-113 | 1.21E+00    | VSM_cells | RPL13A   |
| LMNA4     | 7.94E-132 | 1.038897531 | 0.757 | 0.365 | 4.87E-127 | 2.07E+00    | VSM_cells | LMNA     |
| PDLIM11   | 0         | 1.036461201 | 0.596 | 0.09  | 0         | 6.622222222 | VSM_cells | PDLIM1   |
| S100A42   | 8.23E-117 | 1.036205269 | 0.288 | 0.05  | 5.05E-112 | 5.76E+00    | VSM_cells | S100A4   |
| FRZB      | 0         | 1.035877879 | 0.516 | 0.025 | 0         | 20.64       | VSM_cells | FRZB     |
| CD441     | 1.38E-209 | 1.033103464 | 0.49  | 0.092 | 8.49E-205 | 5.33E+00    | VSM_cells | CD44     |
| PPP1R15A4 | 1.05E-191 | 1.033017617 | 0.702 | 0.188 | 6.46E-187 | 3.73E+00    | VSM_cells | PPP1R15A |
| RPS164    | 2.64E-126 | 1.032377    | 0.899 | 0.755 | 1.62E-121 | 1.19E+00    | VSM_cells | RPS16    |
| RPL414    | 8.02E-129 | 1.030022165 | 0.915 | 0.785 | 4.92E-124 | 1.17E+00    | VSM_cells | RPL41    |
| UTRN1     | 3.26E-123 | 1.023377845 | 0.759 | 0.364 | 2.00E-118 | 2.09E+00    | VSM_cells | UTRN     |
| PPP1R12A  | 7.02E-104 | 1.020585394 | 0.759 | 0.474 | 4.31E-99  | 1.60E+00    | VSM_cells | PPP1R12A |
| PDLIM31   | 0         | 1.014196211 | 0.564 | 0.05  | 0         | 11.28       | VSM_cells | PDLIM3   |
| RAMP1     | 0         | 1.013053663 | 0.469 | 0.019 | 0         | 24.68421053 | VSM_cells | RAMP1    |
| RPL243    | 1.70E-114 | 1.01116579  | 0.884 | 0.741 | 1.04E-109 | 1.19E+00    | VSM_cells | RPL24    |
| CPE2      | 7.54E-201 | 1.006625468 | 0.736 | 0.205 | 4.62E-196 | 3.59E+00    | VSM_cells | CPE      |
| NTRK21    | 0         | 1.005608146 | 0.531 | 0.027 | 0         | 19.66666667 | VSM_cells | NTRK2    |
| CCDC31    | 0         | 1.004779736 | 0.567 | 0.04  | 0         | 14.175      | VSM_cells | CCDC3    |
