# Supplementary material for: Low XIST expression in Sertoli cells of Klinefelter syndrome patients causes high susceptibility of these cells to an extra X chromosome
Source: PubMed Central journal article supplement — Asian J Androl. 2023 May 16;25(6):662–73. doi: 10.4103/aja202315 (PMC10715603; doi:10.4103/aja202315), 2023-05-16
Supplement: AJA-25-662_Suppl6.pdf [file AJA-25-662_Suppl6.pdf]

Supplementary Table 2: DEGs between KS and OA SCs

logFC&gt;0.25

|          | p_val     | avg_logFC   | pct.1 | pct.2 | p_val_adj | CHRO | NXI GENE | MGI database |
|----------|-----------|-------------|-------|-------|-----------|------|----------|--------------|
| MIF      | 3.03E-103 | 1.671323685 | 0.84  | 0.234 | 1.35E-98  | 22   | #N/A     | #N/A         |
| RPL36A   | 4.64E-100 | 1.637040069 | 0.821 | 0.203 | 2.06E-95  | X    | YES      | #N/A         |
| RPL17    | 1.98E-91  | 1.441726647 | 0.805 | 0.195 | 8.78E-87  | 18   | #N/A     | #N/A         |
| RPS17    | 8.35E-95  | 1.372976856 | 0.943 | 0.443 | 3.71E-90  | 15   | #N/A     | #N/A         |
| RPS21    | 3.87E-97  | 1.370619916 | 0.958 | 0.543 | 1.72E-92  | 20   | #N/A     | #N/A         |
| RPL31    | 4.33E-92  | 1.283515584 | 0.969 | 0.581 | 1.92E-87  | 2    | #N/A     | #N/A         |
| RPL41    | 3.92E-107 | 1.259251934 | 0.996 | 0.87  | 1.74E-102 | 12   | #N/A     | #N/A         |
| ACTB     | 1.44E-93  | 1.249763766 | 0.989 | 0.671 | 6.42E-89  | 7    | #N/A     | MGI:3032619  |
| PPDPF    | 6.76E-72  | 1.231577355 | 0.901 | 0.496 | 3.00E-67  | 20   | #N/A     | #N/A         |
| MYL9     | 1.01E-66  | 1.142708652 | 0.847 | 0.348 | 4.51E-62  | 20   | #N/A     | #N/A         |
| TMSB4X   | 1.78E-51  | 1.118016852 | 0.595 | 0.153 | 7.90E-47  | X    | YES      | #N/A         |
| HBA2     | 2.99E-17  | 1.115361017 | 0.107 | 0.009 | 1.33E-12  | 16   | #N/A     | #N/A         |
| CD99     | 2.53E-42  | 1.113285902 | 0.706 | 0.277 | 1.12E-37  | X    | #N/A     | #N/A         |
| PFN1     | 6.90E-63  | 1.112166688 | 0.63  | 0.143 | 3.07E-58  | 17   | #N/A     | #N/A         |
| UQCRQ    | 3.64E-51  | 1.106819589 | 0.779 | 0.338 | 1.62E-46  | 5    | #N/A     | #N/A         |
| RPS29    | 7.93E-95  | 1.099929341 | 0.985 | 0.804 | 3.52E-90  | 14   | #N/A     | #N/A         |
| RPL38    | 1.22E-90  | 1.08572825  | 0.973 | 0.752 | 5.44E-86  | 17   | #N/A     | MGI:1861228  |
| SLC25A6  | 1.60E-60  | 1.069852721 | 0.771 | 0.27  | 7.10E-56  | X    | #N/A     | #N/A         |
| RPLP2    | 2.43E-86  | 1.065571463 | 0.985 | 0.721 | 1.08E-81  | 11   | #N/A     | #N/A         |
| RPL39    | 2.36E-77  | 1.065287085 | 0.973 | 0.69  | 1.05E-72  | X    | YES      | #N/A         |
| RPS26    | 9.79E-66  | 1.060555127 | 0.92  | 0.562 | 4.35E-61  | 12   | #N/A     | #N/A         |
| NDUFA11  | 6.30E-56  | 1.040904442 | 0.771 | 0.297 | 2.80E-51  | 19   | #N/A     | #N/A         |
| MIR202HG | 1.89E-55  | 1.030651325 | 0.947 | 0.63  | 8.41E-51  | 10   | #N/A     | #N/A         |
| BEX1     | 2.66E-64  | 1.0296462   | 0.935 | 0.54  | 1.18E-59  | X    | YES      | #N/A         |
| EEF1A1   | 5.48E-112 | 1.025445711 | 0.996 | 0.942 | 2.44E-107 | 6    | #N/A     | #N/A         |
| USMG5    | 3.05E-65  | 1.017202599 | 0.916 | 0.543 | 1.35E-60  | 10   | #N/A     | #N/A         |
| G6PD     | 4.45E-48  | 1.01585106  | 0.702 | 0.247 | 1.98E-43  | X    | YES      | #N/A         |
| RPL37    | 1.47E-66  | 1.013673993 | 0.95  | 0.675 | 6.54E-62  | 5    | #N/A     | #N/A         |
| RPS27    | 2.48E-91  | 1.009652287 | 0.985 | 0.882 | 1.10E-86  | 1    | #N/A     | #N/A         |
| SPARC    | 2.77E-27  | 0.982972755 | 0.683 | 0.316 | 1.23E-22  | 5    | #N/A     | #N/A         |
| RPL36    | 2.68E-72  | 0.982124693 | 0.973 | 0.728 | 1.19E-67  | 19   | #N/A     | #N/A         |
| RPL13A   | 3.20E-88  | 0.973554384 | 0.989 | 0.823 | 1.42E-83  | 19   | #N/A     | #N/A         |
| RPL23A   | 1.05E-75  | 0.968389705 | 0.977 | 0.716 | 4.67E-71  | 17   | #N/A     | #N/A         |
| RPL27    | 4.62E-65  | 0.961842698 | 0.939 | 0.583 | 2.06E-60  | 17   | #N/A     | #N/A         |
| PSAP     | 1.25E-33  | 0.961595755 | 0.473 | 0.137 | 5.54E-29  | 10   | #N/A     | MGI:3711720  |
| IGFBP7   | 6.02E-58  | 0.96102484  | 0.561 | 0.108 | 2.68E-53  | 4    | #N/A     | MGI:5618913  |
| GAPDH    | 7.58E-70  | 0.956463643 | 0.958 | 0.754 | 3.37E-65  | 12   | #N/A     | #N/A         |
| RPS28    | 6.01E-70  | 0.942349959 | 0.95  | 0.702 | 2.67E-65  | 19   | #N/A     | #N/A         |
| UQCR11   | 4.19E-45  | 0.941687216 | 0.767 | 0.315 | 1.86E-40  | 19   | #N/A     | #N/A         |
| PHGDH    | 6.66E-50  | 0.941376556 | 0.443 | 0.077 | 2.96E-45  | 1    | #N/A     | #N/A         |
| RPL27A   | 5.15E-72  | 0.934878761 | 0.969 | 0.707 | 2.29E-67  | 11   | #N/A     | #N/A         |
| HNRNPA1  | 4.13E-51  | 0.931929057 | 0.859 | 0.411 | 1.84E-46  | 12   | #N/A     | #N/A         |
| RHOC     | 5.69E-50  | 0.92820538  | 0.718 | 0.241 | 2.53E-45  | 1    | #N/A     | #N/A         |
| B2M      | 3.04E-32  | 0.924334367 | 0.439 | 0.125 | 1.35E-27  | 15   | #N/A     | #N/A         |
| FTH1     | 5.70E-85  | 0.924014117 | 0.996 | 0.866 | 2.53E-80  | 11   | #N/A     | #N/A         |
| TIMP1    | 1.96E-27  | 0.923969914 | 0.683 | 0.332 | 8.73E-23  | X    | YES      | MGI:3512125  |
| RPL37A   | 3.39E-89  | 0.909324885 | 0.996 | 0.895 | 1.51E-84  | 2    | #N/A     | #N/A         |
| GABARAP  | 1.41E-46  | 0.908014053 | 0.588 | 0.161 | 6.27E-42  | 17   | #N/A     | #N/A         |
| HSPB1    | 1.67E-35  | 0.907080995 | 0.462 | 0.126 | 7.44E-31  | 7    | #N/A     | #N/A         |
| SNHG25   | 9.38E-52  | 0.905878951 | 0.347 | 0.038 | 4.17E-47  | 17   | #N/A     | #N/A         |
| RPS10    | 7.82E-62  | 0.90178014  | 0.954 | 0.671 | 3.48E-57  | 6    | #N/A     | #N/A         |
| RPS20    | 1.33E-69  | 0.898300111 | 0.962 | 0.78  | 5.89E-65  | 8    | #N/A     | #N/A         |
| INHA     | 2.22E-32  | 0.896370884 | 0.557 | 0.199 | 9.89E-28  | 2    | #N/A     | MGI:1857202  |
| AKR1B1   | 1.22E-41  | 0.895356794 | 0.55  | 0.157 | 5.41E-37  | 7    | #N/A     | #N/A         |
| PGAM1    | 1.66E-41  | 0.894123094 | 0.706 | 0.285 | 7.36E-37  | 10   | #N/A     | #N/A         |
| NUTF2    | 9.83E-41  | 0.887659349 | 0.565 | 0.17  | 4.37E-36  | 16   | #N/A     | #N/A         |
| RPL12    | 1.27E-48  | 0.887634262 | 0.866 | 0.446 | 5.66E-44  | 9    | #N/A     | #N/A         |
| RPL4     | 1.01E-44  | 0.884582296 | 0.809 | 0.361 | 4.50E-40  | 15   | #N/A     | #N/A         |
| RPL34    | 2.79E-64  | 0.881998434 | 0.977 | 0.707 | 1.24E-59  | 4    | #N/A     | #N/A         |
| OST4     | 1.53E-47  | 0.881301797 | 0.851 | 0.414 | 6.79E-43  | 2    | #N/A     | #N/A         |
| CLU      | 2.18E-20  | 0.878667873 | 0.927 | 0.641 | 9.68E-16  | 8    | #N/A     | #N/A         |
| MT1X     | 1.79E-35  | 0.877204562 | 0.508 | 0.15  | 7.94E-31  | 16   | #N/A     | MGI:1857301  |
| TUBA1A   | 3.68E-43  | 0.872613757 | 0.832 | 0.378 | 1.64E-38  | 12   | #N/A     | #N/A         |
| COX7C    | 7.42E-52  | 0.869595504 | 0.92  | 0.616 | 3.30E-47  | 5    | #N/A     | #N/A         |
| RPS19    | 2.20E-62  | 0.867005844 | 0.977 | 0.722 | 9.78E-58  | 19   | #N/A     | #N/A         |
| MT2A     | 1.01E-28  | 0.863732426 | 0.469 | 0.148 | 4.48E-24  | 16   | #N/A     | #N/A         |
| ATP5G2   | 1.24E-41  | 0.861054998 | 0.821 | 0.421 | 5.53E-37  | 12   | #N/A     | #N/A         |
| RPL23    | 8.25E-49  | 0.857665476 | 0.905 | 0.553 | 3.67E-44  | 17   | #N/A     | #N/A         |
| RPLP1    | 7.11E-91  | 0.855417297 | 1     | 0.927 | 3.16E-86  | 15   | #N/A     | MGI:6094829  |
| COX8A    | 3.04E-42  | 0.852817531 | 0.802 | 0.395 | 1.35E-37  | 11   | #N/A     | #N/A         |
| NDUFA1   | 2.13E-36  | 0.850860912 | 0.725 | 0.315 | 9.47E-32  | X    | YES      | #N/A         |

|          |          |             |       |       |          |    |      |             |
|----------|----------|-------------|-------|-------|----------|----|------|-------------|
| TOMM7    | 3.08E-47 | 0.849277105 | 0.878 | 0.493 | 1.37E-42 | 7  | #N/A | #N/A        |
| PPIA     | 3.10E-45 | 0.84611697  | 0.851 | 0.455 | 1.38E-40 | 7  | #N/A | #N/A        |
| RPL18A   | 8.06E-65 | 0.83804246  | 0.977 | 0.695 | 3.58E-60 | 19 | #N/A | #N/A        |
| RPLP0    | 1.20E-50 | 0.835347202 | 0.916 | 0.585 | 5.33E-46 | 12 | #N/A | #N/A        |
| RPL21    | 3.73E-64 | 0.832620584 | 0.966 | 0.748 | 1.66E-59 | 13 | #N/A | #N/A        |
| SERPINA5 | 1.12E-24 | 0.831506491 | 0.733 | 0.383 | 5.00E-20 | 14 | #N/A | MGI:2445835 |
| NDUFS5   | 2.59E-37 | 0.827473661 | 0.786 | 0.387 | 1.15E-32 | 1  | #N/A | #N/A        |
| MYL6B    | 2.28E-45 | 0.823231169 | 0.924 | 0.702 | 1.02E-40 | 12 | #N/A | #N/A        |
| RPL28    | 3.52E-66 | 0.82058653  | 0.973 | 0.829 | 1.56E-61 | 19 | #N/A | #N/A        |
| IFITM2   | 1.18E-31 | 0.818917875 | 0.55  | 0.197 | 5.23E-27 | 11 | #N/A | #N/A        |
| S100A10  | 4.47E-45 | 0.818800032 | 0.893 | 0.582 | 1.99E-40 | 1  | #N/A | #N/A        |
| CFL1     | 6.81E-42 | 0.81707866  | 0.859 | 0.475 | 3.03E-37 | 11 | #N/A | #N/A        |
| RPS8     | 3.59E-52 | 0.8049048   | 0.935 | 0.681 | 1.60E-47 | 1  | #N/A | #N/A        |
| POLR2L   | 2.98E-34 | 0.802092589 | 0.737 | 0.35  | 1.32E-29 | 11 | #N/A | #N/A        |
| NDUFB1   | 4.47E-29 | 0.801335192 | 0.653 | 0.305 | 1.99E-24 | 14 | #N/A | #N/A        |
| DEFB119  | 2.83E-48 | 0.801312755 | 0.901 | 0.781 | 1.26E-43 | 20 | #N/A | #N/A        |
| RPS16    | 3.68E-52 | 0.801076893 | 0.958 | 0.668 | 1.64E-47 | 19 | #N/A | #N/A        |
| ATP5I    | 1.36E-35 | 0.799945423 | 0.771 | 0.381 | 6.04E-31 | 4  | #N/A | #N/A        |
| DLK1     | 2.46E-54 | 0.798389676 | 0.263 | 0.009 | 1.09E-49 | 14 | #N/A | MGI:3640339 |
| JUNB     | 6.36E-27 | 0.795814838 | 0.466 | 0.15  | 2.83E-22 | 19 | #N/A | #N/A        |
| DCN      | 3.47E-38 | 0.792318547 | 0.275 | 0.031 | 1.54E-33 | 12 | #N/A | MGI:2153002 |
| SERPINF1 | 7.79E-21 | 0.791202661 | 0.637 | 0.311 | 3.46E-16 | 17 | #N/A | MGI:2664515 |
| GSTA2    | 8.90E-28 | 0.789540446 | 0.641 | 0.303 | 3.95E-23 | 6  | #N/A | #N/A        |
| VDAC1    | 1.05E-35 | 0.781753361 | 0.618 | 0.215 | 4.68E-31 | 5  | #N/A | #N/A        |
| UQCRH    | 6.81E-32 | 0.777125988 | 0.767 | 0.389 | 3.03E-27 | 1  | #N/A | #N/A        |
| GSTA4    | 9.85E-34 | 0.77617235  | 0.508 | 0.152 | 4.38E-29 | 6  | #N/A | #N/A        |
| TRAPPC1  | 1.08E-30 | 0.77572979  | 0.599 | 0.234 | 4.79E-26 | 17 | #N/A | #N/A        |
| CSTB     | 1.82E-34 | 0.774741839 | 0.756 | 0.347 | 8.09E-30 | 21 | #N/A | #N/A        |
| TMSB10   | 4.22E-60 | 0.774197798 | 0.992 | 0.925 | 1.88E-55 | 2  | #N/A | #N/A        |
| RPSA     | 5.19E-42 | 0.773863984 | 0.836 | 0.402 | 2.31E-37 | 3  | #N/A | #N/A        |
| ALDOA    | 7.49E-35 | 0.771407593 | 0.664 | 0.26  | 3.33E-30 | 16 | #N/A | #N/A        |
| SNRPB    | 9.25E-34 | 0.770494688 | 0.569 | 0.201 | 4.11E-29 | 20 | #N/A | #N/A        |
| ACOT2    | 4.65E-40 | 0.758412902 | 0.328 | 0.049 | 2.07E-35 | 14 | #N/A | #N/A        |
| RPL6     | 1.49E-43 | 0.75714974  | 0.908 | 0.577 | 6.64E-39 | 12 | #N/A | #N/A        |
| FGFBP2   | 1.94E-50 | 0.754749278 | 0.26  | 0.012 | 8.61E-46 | 4  | #N/A | #N/A        |
| TXN2     | 3.45E-34 | 0.754102518 | 0.573 | 0.193 | 1.53E-29 | 22 | #N/A | #N/A        |
| ATP5E    | 6.37E-45 | 0.752647385 | 0.931 | 0.64  | 2.83E-40 | 20 | #N/A | #N/A        |
| MT1E     | 2.88E-29 | 0.751890533 | 0.237 | 0.034 | 1.28E-24 | 16 | #N/A | #N/A        |
| SMIM1    | 1.47E-34 | 0.75172365  | 0.782 | 0.386 | 6.55E-30 | 1  | #N/A | #N/A        |
| PCBP2    | 1.64E-34 | 0.751464582 | 0.63  | 0.233 | 7.28E-30 | 12 | #N/A | #N/A        |
| HIGD2A   | 2.76E-33 | 0.74966735  | 0.649 | 0.252 | 1.23E-28 | 5  | #N/A | #N/A        |
| PPP2R1A  | 3.62E-32 | 0.749391662 | 0.454 | 0.132 | 1.61E-27 | 19 | #N/A | #N/A        |
| KRTCAP2  | 2.40E-31 | 0.748823718 | 0.527 | 0.173 | 1.07E-26 | 1  | #N/A | #N/A        |
| COMMD6   | 2.05E-30 | 0.744867987 | 0.748 | 0.382 | 9.12E-26 | 13 | #N/A | #N/A        |
| ECH1     | 9.18E-29 | 0.742756683 | 0.702 | 0.335 | 4.08E-24 | 19 | #N/A | #N/A        |
| RPS25    | 1.72E-44 | 0.741829098 | 0.927 | 0.648 | 7.66E-40 | 11 | #N/A | #N/A        |
| RPS15A   | 1.60E-44 | 0.741196707 | 0.939 | 0.709 | 7.13E-40 | 16 | #N/A | #N/A        |
| IFITM3   | 7.96E-39 | 0.741082645 | 0.889 | 0.524 | 3.54E-34 | 11 | #N/A | #N/A        |
| MYL6     | 1.85E-52 | 0.740981273 | 0.969 | 0.741 | 8.20E-48 | 12 | #N/A | #N/A        |
| ENO1     | 6.13E-32 | 0.740065683 | 0.702 | 0.296 | 2.72E-27 | 1  | #N/A | #N/A        |
| ATP5C1   | 2.95E-31 | 0.739642839 | 0.744 | 0.362 | 1.31E-26 | 10 | #N/A | #N/A        |
| TFF3     | 1.00E-31 | 0.737294909 | 0.202 | 0.018 | 4.46E-27 | 21 | #N/A | #N/A        |
| RPS3     | 7.75E-61 | 0.735583603 | 0.977 | 0.824 | 3.44E-56 | 11 | #N/A | #N/A        |
| IL32     | 2.85E-26 | 0.734359904 | 0.156 | 0.012 | 1.27E-21 | 16 | #N/A | #N/A        |
| IFI27    | 2.99E-24 | 0.734239601 | 0.718 | 0.379 | 1.33E-19 | 14 | #N/A | #N/A        |
| AMH      | 2.02E-17 | 0.731951174 | 0.202 | 0.048 | 9.00E-13 | 19 | #N/A | MGI:1857126 |
| HNRNPA0  | 1.52E-34 | 0.731180035 | 0.485 | 0.137 | 6.74E-30 | 5  | #N/A | #N/A        |
| TMEM14C  | 7.15E-31 | 0.730041754 | 0.531 | 0.182 | 3.18E-26 | 6  | #N/A | #N/A        |
| S100A11  | 8.51E-28 | 0.729189565 | 0.725 | 0.366 | 3.78E-23 | 1  | #N/A | MGI:2681771 |
| VIM      | 2.61E-40 | 0.728523027 | 0.943 | 0.586 | 1.16E-35 | 10 | #N/A | #N/A        |
| ARF5     | 6.44E-30 | 0.72526148  | 0.401 | 0.106 | 2.86E-25 | 7  | #N/A | #N/A        |
| RPS27A   | 8.78E-51 | 0.724678728 | 0.962 | 0.77  | 3.90E-46 | 2  | #N/A | #N/A        |
| RPL10A   | 1.65E-39 | 0.718300982 | 0.901 | 0.567 | 7.31E-35 | 6  | #N/A | #N/A        |
| GSN      | 4.46E-37 | 0.714888846 | 0.374 | 0.074 | 1.98E-32 | 9  | #N/A | MGI:2179509 |
| BANF1    | 8.83E-34 | 0.711429244 | 0.576 | 0.197 | 3.92E-29 | 11 | #N/A | #N/A        |
| COX6A1   | 4.08E-28 | 0.710731329 | 0.756 | 0.398 | 1.82E-23 | 12 | #N/A | #N/A        |
| JUN      | 1.51E-22 | 0.70654198  | 0.431 | 0.146 | 6.70E-18 | 1  | #N/A | #N/A        |
| ATOX1    | 1.58E-25 | 0.706285214 | 0.634 | 0.287 | 7.01E-21 | 5  | #N/A | #N/A        |
| FOS      | 6.10E-29 | 0.703190007 | 0.527 | 0.167 | 2.71E-24 | 14 | #N/A | MGI:1857171 |
| SMIM4    | 3.64E-32 | 0.701459703 | 0.397 | 0.099 | 1.62E-27 | 3  | #N/A | #N/A        |
| TIMM8B   | 5.12E-26 | 0.701091033 | 0.676 | 0.331 | 2.28E-21 | 11 | #N/A | #N/A        |
| PSMA2    | 9.00E-31 | 0.699079752 | 0.622 | 0.241 | 4.00E-26 | 7  | #N/A | #N/A        |
| ANXA2    | 3.28E-27 | 0.696587716 | 0.618 | 0.266 | 1.46E-22 | 15 | #N/A | #N/A        |
| TRMT112  | 3.06E-27 | 0.696375633 | 0.729 | 0.372 | 1.36E-22 | 11 | #N/A | #N/A        |
| TUBB     | 1.85E-25 | 0.694913643 | 0.645 | 0.293 | 8.21E-21 | 6  | #N/A | #N/A        |

|         |          |             |       |       |          |    |      |             |
|---------|----------|-------------|-------|-------|----------|----|------|-------------|
| TAGLN2  | 5.12E-30 | 0.694208205 | 0.782 | 0.402 | 2.28E-25 | 1  | #N/A | #N/A        |
| TMEM258 | 3.26E-28 | 0.693909416 | 0.641 | 0.272 | 1.45E-23 | 11 | #N/A | #N/A        |
| TPT1    | 4.14E-61 | 0.691959528 | 0.981 | 0.879 | 1.84E-56 | 13 | #N/A | #N/A        |
| GAMT    | 1.81E-25 | 0.691239683 | 0.718 | 0.372 | 8.04E-21 | 19 | #N/A | MGI:3044282 |
| RPL35A  | 6.06E-52 | 0.688752244 | 0.962 | 0.788 | 2.69E-47 | 3  | #N/A | #N/A        |
| RPL10   | 3.50E-39 | 0.688238186 | 0.943 | 0.691 | 1.56E-34 | X  | YES  | #N/A        |
| RPS23   | 3.74E-45 | 0.686944803 | 0.954 | 0.757 | 1.66E-40 | 5  | #N/A | #N/A        |
| DEFB123 | 1.75E-22 | 0.684021175 | 0.752 | 0.487 | 7.79E-18 | 20 | #N/A | #N/A        |
| CYP11A1 | 1.20E-30 | 0.681099943 | 0.332 | 0.071 | 5.32E-26 | 15 | #N/A | MGI:2183813 |
| ROMO1   | 2.22E-27 | 0.679173491 | 0.626 | 0.269 | 9.85E-23 | 20 | #N/A | #N/A        |
| CALM2   | 3.19E-43 | 0.678756877 | 0.947 | 0.732 | 1.42E-38 | 2  | #N/A | #N/A        |
| SCP2    | 2.39E-26 | 0.678362938 | 0.641 | 0.287 | 1.06E-21 | 1  | #N/A | #N/A        |
| NDUFA4  | 1.02E-34 | 0.67566102  | 0.901 | 0.59  | 4.52E-30 | 7  | #N/A | #N/A        |
| GSTM4   | 2.21E-33 | 0.674629819 | 0.309 | 0.054 | 9.84E-29 | 1  | #N/A | #N/A        |
| UBL5    | 5.71E-30 | 0.67115016  | 0.84  | 0.535 | 2.54E-25 | 19 | #N/A | #N/A        |
| SH3BGRL | 7.03E-26 | 0.670893278 | 0.641 | 0.287 | 3.12E-21 | X  | #N/A | #N/A        |
| RPS18   | 4.88E-57 | 0.669822472 | 0.992 | 0.895 | 2.17E-52 | 6  | #N/A | #N/A        |
| TMEM52  | 3.78E-21 | 0.669507664 | 0.366 | 0.121 | 1.68E-16 | 1  | #N/A | #N/A        |
| RPS4Y1  | 3.69E-25 | 0.6657033   | 0.725 | 0.386 | 1.64E-20 | Y  | #N/A | #N/A        |
| MRPS6   | 1.34E-24 | 0.664368417 | 0.637 | 0.296 | 5.97E-20 | 21 | #N/A | #N/A        |
| RBM3    | 2.12E-26 | 0.664140478 | 0.515 | 0.187 | 9.42E-22 | X  | YES  | #N/A        |
| HIGD1A  | 2.02E-28 | 0.664016877 | 0.435 | 0.129 | 8.97E-24 | 3  | #N/A | #N/A        |
| TPI1    | 6.82E-27 | 0.663744231 | 0.79  | 0.453 | 3.03E-22 | 12 | #N/A | #N/A        |
| VAMP2   | 2.36E-28 | 0.66110497  | 0.511 | 0.174 | 1.05E-23 | 17 | #N/A | #N/A        |
| RPL26   | 1.36E-40 | 0.658048211 | 0.958 | 0.754 | 6.03E-36 | 17 | #N/A | #N/A        |
| RPS4X   | 2.24E-47 | 0.657160321 | 0.973 | 0.808 | 9.94E-43 | X  | #N/A | #N/A        |
| SRP9    | 1.36E-28 | 0.656856801 | 0.641 | 0.266 | 6.03E-24 | 1  | #N/A | #N/A        |
| RBP1    | 1.36E-27 | 0.651569097 | 0.752 | 0.382 | 6.05E-23 | 3  | #N/A | MGI:2181412 |
| PET100  | 1.53E-24 | 0.651389048 | 0.462 | 0.164 | 6.80E-20 | 19 | #N/A | #N/A        |
| COX6C   | 1.41E-29 | 0.649766284 | 0.851 | 0.589 | 6.28E-25 | 8  | #N/A | #N/A        |
| ISYNA1  | 1.96E-27 | 0.649513261 | 0.847 | 0.513 | 8.72E-23 | 19 | #N/A | #N/A        |
| IFI27L2 | 1.78E-23 | 0.64813044  | 0.542 | 0.225 | 7.92E-19 | 14 | #N/A | #N/A        |
| DYNLRB1 | 1.21E-24 | 0.647366693 | 0.504 | 0.19  | 5.38E-20 | 20 | #N/A | #N/A        |
| CIRBP   | 4.99E-25 | 0.647243509 | 0.718 | 0.352 | 2.22E-20 | 19 | #N/A | MGI:5432527 |
| TUBA1B  | 5.71E-28 | 0.645771211 | 0.885 | 0.572 | 2.54E-23 | 12 | #N/A | #N/A        |
| UXT     | 1.20E-24 | 0.645173251 | 0.401 | 0.125 | 5.32E-20 | X  | YES  | MGI:6159372 |
| EGR1    | 3.56E-05 | 0.643507322 | 0.198 | 0.104 | 1        | 5  | #N/A | MGI:5766183 |
| SF3A2   | 1.42E-32 | 0.64318846  | 0.256 | 0.036 | 6.32E-28 | 19 | #N/A | #N/A        |
| TMA7    | 3.12E-32 | 0.641120824 | 0.882 | 0.631 | 1.39E-27 | 3  | #N/A | #N/A        |
| SLC25A5 | 1.32E-25 | 0.640143432 | 0.656 | 0.291 | 5.85E-21 | X  | YES  | #N/A        |
| SERF2   | 5.25E-35 | 0.6399982   | 0.931 | 0.669 | 2.33E-30 | 15 | #N/A | #N/A        |
| ZFP36   | 3.74E-18 | 0.63825895  | 0.271 | 0.078 | 1.66E-13 | 19 | #N/A | #N/A        |
| SRI     | 7.92E-23 | 0.637921488 | 0.485 | 0.188 | 3.52E-18 | 7  | #N/A | #N/A        |
| ETFA    | 3.10E-29 | 0.635707144 | 0.439 | 0.129 | 1.38E-24 | 15 | #N/A | #N/A        |
| SNHG19  | 1.04E-27 | 0.634026356 | 0.366 | 0.093 | 4.61E-23 | 16 | #N/A | #N/A        |
| ZFAS1   | 6.36E-26 | 0.634009392 | 0.504 | 0.185 | 2.83E-21 | 20 | #N/A | #N/A        |
| RPL5    | 9.26E-40 | 0.632022529 | 0.95  | 0.716 | 4.12E-35 | 1  | #N/A | #N/A        |
| MTHFS   | 5.33E-28 | 0.629499428 | 0.439 | 0.132 | 2.37E-23 | 15 | #N/A | #N/A        |
| RPL7    | 3.70E-32 | 0.629479092 | 0.885 | 0.629 | 1.64E-27 | 8  | #N/A | #N/A        |
| CNIH1   | 1.39E-22 | 0.628330707 | 0.355 | 0.108 | 6.20E-18 | 14 | #N/A | #N/A        |
| TAX1BP3 | 3.24E-24 | 0.626665291 | 0.359 | 0.102 | 1.44E-19 | 17 | #N/A | #N/A        |
| EMP3    | 2.06E-24 | 0.623374215 | 0.282 | 0.063 | 9.18E-20 | 19 | #N/A | #N/A        |
| FATE1   | 2.74E-38 | 0.621953552 | 0.981 | 0.793 | 1.22E-33 | X  | YES  | #N/A        |
| RPL9    | 1.06E-40 | 0.619131687 | 0.954 | 0.783 | 4.70E-36 | 4  | #N/A | #N/A        |
| NDUFB9  | 4.64E-25 | 0.617780468 | 0.771 | 0.464 | 2.06E-20 | 8  | #N/A | #N/A        |
| MYL12A  | 7.90E-23 | 0.617025951 | 0.683 | 0.335 | 3.51E-18 | 18 | #N/A | #N/A        |
| ARL6IP1 | 8.13E-22 | 0.616411532 | 0.595 | 0.272 | 3.61E-17 | 16 | #N/A | #N/A        |
| MRPL33  | 3.24E-21 | 0.613762422 | 0.641 | 0.319 | 1.44E-16 | 2  | #N/A | #N/A        |
| PRDX1   | 5.47E-23 | 0.612783365 | 0.779 | 0.46  | 2.43E-18 | 1  | #N/A | #N/A        |
| TSEN34  | 4.66E-27 | 0.61054319  | 0.607 | 0.234 | 2.07E-22 | 19 | #N/A | #N/A        |
| SNRPN   | 7.28E-23 | 0.608580143 | 0.523 | 0.213 | 3.24E-18 | 15 | #N/A | #N/A        |
| TIMM13  | 5.60E-24 | 0.608358075 | 0.515 | 0.197 | 2.49E-19 | 19 | #N/A | MGI:6257582 |
| FXVD6   | 1.71E-20 | 0.608320953 | 0.45  | 0.175 | 7.61E-16 | 11 | #N/A | #N/A        |
| CLDN11  | 6.45E-16 | 0.608011183 | 0.588 | 0.307 | 2.87E-11 | 3  | #N/A | MA          |
| YWHAE   | 1.11E-22 | 0.607256289 | 0.664 | 0.324 | 4.93E-18 | 17 | #N/A | MGI:2667341 |
| GSTA1   | 3.34E-35 | 0.607234638 | 0.927 | 0.686 | 1.49E-30 | 6  | #N/A | #N/A        |
| PRPS2   | 4.04E-22 | 0.606298607 | 0.565 | 0.25  | 1.80E-17 | X  | YES  | #N/A        |
| RPL14   | 6.09E-23 | 0.606004117 | 0.798 | 0.492 | 2.71E-18 | 3  | #N/A | #N/A        |
| TAF11   | 1.08E-18 | 0.605355382 | 0.401 | 0.157 | 4.80E-14 | 6  | #N/A | #N/A        |
| CTSV    | 1.31E-14 | 0.605349141 | 0.37  | 0.157 | 5.81E-10 | 9  | #N/A | #N/A        |
| ATP5B   | 9.16E-22 | 0.6035281   | 0.748 | 0.412 | 4.07E-17 | 12 | #N/A | #N/A        |
| RPS12   | 1.10E-44 | 0.600956898 | 0.973 | 0.825 | 4.87E-40 | 6  | #N/A | #N/A        |
| ATP5J2  | 1.19E-22 | 0.600920794 | 0.733 | 0.423 | 5.27E-18 | 7  | #N/A | #N/A        |
| SNRPE   | 1.23E-23 | 0.600345328 | 0.546 | 0.219 | 5.49E-19 | 1  | #N/A | #N/A        |
| SEC61G  | 3.73E-26 | 0.599208936 | 0.76  | 0.379 | 1.66E-21 | 7  | #N/A | #N/A        |

|          |          |             |       |       |          |    |      |             |
|----------|----------|-------------|-------|-------|----------|----|------|-------------|
| RPS13    | 1.84E-36 | 0.598759019 | 0.962 | 0.753 | 8.20E-32 | 11 | #N/A | #N/A        |
| DYNLT1   | 1.66E-22 | 0.597722319 | 0.805 | 0.502 | 7.40E-18 | 6  | #N/A | #N/A        |
| COX5B    | 3.28E-28 | 0.595719214 | 0.855 | 0.557 | 1.46E-23 | 2  | #N/A | #N/A        |
| MRPL16   | 4.85E-24 | 0.595287429 | 0.534 | 0.211 | 2.16E-19 | 11 | #N/A | #N/A        |
| RPS15    | 3.86E-38 | 0.595198729 | 0.954 | 0.785 | 1.72E-33 | 19 | #N/A | #N/A        |
| PKM      | 7.46E-23 | 0.594860284 | 0.79  | 0.446 | 3.32E-18 | 15 | #N/A | #N/A        |
| COX7B    | 3.05E-22 | 0.594749846 | 0.565 | 0.246 | 1.36E-17 | X  | YES  | #N/A        |
| COX17    | 3.56E-19 | 0.594648909 | 0.504 | 0.221 | 1.58E-14 | 3  | #N/A | #N/A        |
| CHPF     | 2.49E-18 | 0.592661845 | 0.332 | 0.114 | 1.11E-13 | 2  | #N/A | #N/A        |
| APP      | 2.46E-12 | 0.592444217 | 0.275 | 0.106 | 1.09E-07 | 21 | #N/A | MGI:2136847 |
| GLO1     | 2.36E-24 | 0.591323016 | 0.427 | 0.139 | 1.05E-19 | 6  | #N/A | #N/A        |
| RPS5     | 1.88E-25 | 0.590502151 | 0.866 | 0.618 | 8.34E-21 | 19 | #N/A | #N/A        |
| SNHG8    | 6.90E-25 | 0.589998405 | 0.718 | 0.355 | 3.07E-20 | 4  | #N/A | #N/A        |
| CLIC1    | 1.25E-18 | 0.586147153 | 0.317 | 0.102 | 5.56E-14 | 6  | #N/A | #N/A        |
| LGALS1   | 1.87E-26 | 0.584342015 | 0.912 | 0.661 | 8.33E-22 | 22 | #N/A | #N/A        |
| SMIM10   | 6.31E-20 | 0.582262479 | 0.607 | 0.296 | 2.81E-15 | X  | YES  | #N/A        |
| PRAF2    | 1.26E-22 | 0.580754766 | 0.282 | 0.07  | 5.61E-18 | X  | YES  | #N/A        |
| CD151    | 8.72E-15 | 0.580502973 | 0.279 | 0.098 | 3.87E-10 | 11 | #N/A | #N/A        |
| PLP2     | 6.70E-23 | 0.580395525 | 0.263 | 0.061 | 2.98E-18 | X  | YES  | #N/A        |
| ABRACL   | 3.56E-19 | 0.580096773 | 0.615 | 0.308 | 1.58E-14 | 6  | #N/A | #N/A        |
| MTCH1    | 2.04E-21 | 0.579385551 | 0.576 | 0.256 | 9.06E-17 | 6  | #N/A | #N/A        |
| PSMA1    | 1.04E-19 | 0.578233645 | 0.435 | 0.168 | 4.61E-15 | 11 | #N/A | #N/A        |
| ATP5A1   | 8.27E-20 | 0.577862029 | 0.71  | 0.384 | 3.68E-15 | 18 | #N/A | #N/A        |
| NUDT10   | 7.49E-24 | 0.577627972 | 0.397 | 0.123 | 3.33E-19 | X  | YES  | #N/A        |
| ZYX      | 1.68E-19 | 0.576048345 | 0.374 | 0.135 | 7.46E-15 | 7  | #N/A | #N/A        |
| S100A16  | 2.66E-24 | 0.575746684 | 0.649 | 0.295 | 1.18E-19 | 1  | #N/A | #N/A        |
| COL1A2   | 1.47E-13 | 0.574875456 | 0.366 | 0.156 | 6.56E-09 | 7  | #N/A | #N/A        |
| POLR2G   | 2.07E-21 | 0.574150562 | 0.393 | 0.131 | 9.22E-17 | 11 | #N/A | #N/A        |
| CYB5R3   | 8.63E-22 | 0.574097198 | 0.569 | 0.25  | 3.84E-17 | 22 | #N/A | #N/A        |
| HIST1H1C | 7.75E-12 | 0.574092583 | 0.317 | 0.137 | 3.45E-07 | 6  | #N/A | #N/A        |
| STAR     | 2.30E-23 | 0.57320758  | 0.5   | 0.187 | 1.02E-18 | 8  | #N/A | MGI:2388706 |
| CRYAB    | 2.72E-29 | 0.57216516  | 0.168 | 0.011 | 1.21E-24 | 11 | #N/A | #N/A        |
| BTF3     | 3.12E-22 | 0.572049289 | 0.794 | 0.447 | 1.39E-17 | 5  | #N/A | MGI:3688730 |
| BSG      | 3.46E-15 | 0.571977573 | 0.527 | 0.267 | 1.54E-10 | 19 | #N/A | MA          |
| TOMM34   | 7.65E-24 | 0.571812698 | 0.439 | 0.148 | 3.40E-19 | 20 | #N/A | #N/A        |
| TRIM55   | 4.15E-23 | 0.56966156  | 0.351 | 0.102 | 1.84E-18 | 8  | #N/A | #N/A        |
| DPM3     | 6.11E-24 | 0.56777086  | 0.385 | 0.119 | 2.72E-19 | 1  | #N/A | MGI:5548565 |
| ACTG1    | 3.12E-16 | 0.567262756 | 0.656 | 0.357 | 1.39E-11 | 17 | #N/A | #N/A        |
| NDUFB11  | 2.10E-25 | 0.566330458 | 0.683 | 0.312 | 9.35E-21 | X  | YES  | #N/A        |
| PPIB     | 1.46E-16 | 0.565886333 | 0.447 | 0.196 | 6.49E-12 | 15 | #N/A | #N/A        |
| RPL22    | 4.05E-28 | 0.565658235 | 0.897 | 0.611 | 1.80E-23 | 1  | #N/A | #N/A        |
| RAB7A    | 7.87E-19 | 0.565522469 | 0.405 | 0.154 | 3.50E-14 | 3  | #N/A | #N/A        |
| FAU      | 4.19E-34 | 0.564958802 | 0.947 | 0.758 | 1.86E-29 | 11 | #N/A | #N/A        |
| ATP6V1E1 | 5.47E-24 | 0.564901651 | 0.492 | 0.184 | 2.43E-19 | 22 | #N/A | #N/A        |
| CAPZA2   | 5.56E-24 | 0.564011666 | 0.473 | 0.169 | 2.47E-19 | 7  | #N/A | #N/A        |
| BAX      | 4.31E-20 | 0.562528673 | 0.294 | 0.082 | 1.92E-15 | 19 | #N/A | MA          |
| EIF4A1   | 2.36E-22 | 0.562368624 | 0.534 | 0.211 | 1.05E-17 | 17 | #N/A | #N/A        |
| EMC10    | 1.03E-17 | 0.560302759 | 0.321 | 0.11  | 4.56E-13 | 19 | #N/A | MGI:5085894 |
| NOP10    | 3.36E-22 | 0.558746377 | 0.565 | 0.241 | 1.49E-17 | 15 | #N/A | #N/A        |
| C4orf48  | 1.02E-19 | 0.558308449 | 0.737 | 0.43  | 4.52E-15 | 4  | #N/A | #N/A        |
| RPS3A    | 6.50E-40 | 0.556770738 | 0.977 | 0.83  | 2.89E-35 | 4  | #N/A | #N/A        |
| CDKN1A   | 2.34E-19 | 0.555048214 | 0.298 | 0.089 | 1.04E-14 | 6  | #N/A | MGI:5695874 |
| RPL35    | 5.54E-33 | 0.554946933 | 0.931 | 0.766 | 2.46E-28 | 9  | #N/A | #N/A        |
| DUSP1    | 1.80E-13 | 0.554888152 | 0.256 | 0.089 | 7.99E-09 | 5  | #N/A | #N/A        |
| SNCG     | 5.69E-25 | 0.553699731 | 0.13  | 0.007 | 2.53E-20 | 10 | #N/A | #N/A        |
| FKBP1A   | 2.78E-26 | 0.553685262 | 0.45  | 0.142 | 1.24E-21 | 20 | #N/A | #N/A        |
| EPHX1    | 2.26E-19 | 0.553142896 | 0.233 | 0.056 | 1.01E-14 | 1  | #N/A | #N/A        |
| SNRPG    | 2.84E-22 | 0.552485194 | 0.603 | 0.286 | 1.26E-17 | 2  | #N/A | #N/A        |
| SLC25A3  | 1.04E-21 | 0.551978274 | 0.63  | 0.29  | 4.63E-17 | 12 | #N/A | MGI:5548483 |
| ITM2B    | 1.57E-18 | 0.550796851 | 0.618 | 0.294 | 6.99E-14 | 13 | #N/A | #N/A        |
| NME1     | 4.18E-19 | 0.54967977  | 0.363 | 0.125 | 1.86E-14 | 17 | #N/A | #N/A        |
| C4orf3   | 1.18E-16 | 0.549257595 | 0.519 | 0.25  | 5.25E-12 | 4  | #N/A | #N/A        |
| TOMM5    | 2.87E-23 | 0.548421329 | 0.378 | 0.114 | 1.27E-18 | 9  | #N/A | #N/A        |
| PRNP     | 4.77E-15 | 0.54777109  | 0.298 | 0.107 | 2.12E-10 | 20 | #N/A | #N/A        |
| TSPO     | 1.06E-18 | 0.546860069 | 0.34  | 0.113 | 4.72E-14 | 22 | #N/A | #N/A        |
| EID1     | 1.65E-19 | 0.546846155 | 0.771 | 0.443 | 7.34E-15 | 15 | #N/A | #N/A        |
| CYB5A    | 1.78E-20 | 0.545738471 | 0.649 | 0.318 | 7.92E-16 | 18 | #N/A | #N/A        |
| NDUFS4   | 2.18E-20 | 0.544591439 | 0.504 | 0.207 | 9.69E-16 | 5  | #N/A | #N/A        |
| ATP5D    | 2.18E-18 | 0.543944125 | 0.679 | 0.365 | 9.69E-14 | 19 | #N/A | #N/A        |
| PSAT1    | 9.06E-24 | 0.542613182 | 0.302 | 0.074 | 4.03E-19 | 9  | #N/A | #N/A        |
| CST3     | 2.17E-17 | 0.542467667 | 0.897 | 0.654 | 9.66E-13 | 20 | #N/A | MGI:5586715 |
| AP2M1    | 1.66E-18 | 0.542403135 | 0.584 | 0.282 | 7.38E-14 | 3  | #N/A | #N/A        |
| ANAPC16  | 2.08E-19 | 0.541920078 | 0.569 | 0.262 | 9.23E-15 | 10 | #N/A | #N/A        |
| NAPA     | 1.01E-21 | 0.541878309 | 0.412 | 0.144 | 4.47E-17 | 19 | #N/A | #N/A        |
| C7orf50  | 9.38E-20 | 0.541546252 | 0.462 | 0.185 | 4.17E-15 | 7  | #N/A | #N/A        |

|           |          |             |       |       |          |    |      |             |
|-----------|----------|-------------|-------|-------|----------|----|------|-------------|
| BLOC1S1   | 1.23E-21 | 0.541121703 | 0.492 | 0.189 | 5.45E-17 | 12 | #N/A | #N/A        |
| RAC1      | 7.41E-20 | 0.54084215  | 0.546 | 0.242 | 3.30E-15 | 7  | #N/A | #N/A        |
| CITED2    | 4.02E-25 | 0.539810879 | 0.286 | 0.063 | 1.79E-20 | 6  | #N/A | #N/A        |
| FSCN1     | 2.09E-21 | 0.537288583 | 0.439 | 0.16  | 9.30E-17 | 7  | #N/A | #N/A        |
| PFN2      | 1.44E-23 | 0.536303286 | 0.298 | 0.073 | 6.39E-19 | 3  | #N/A | #N/A        |
| RPL18     | 2.46E-35 | 0.536244611 | 0.969 | 0.791 | 1.10E-30 | 19 | #N/A | #N/A        |
| POLE4     | 1.36E-16 | 0.535479772 | 0.439 | 0.188 | 6.04E-12 | 2  | #N/A | MGI:5085645 |
| RPL29     | 1.82E-27 | 0.534708015 | 0.927 | 0.739 | 8.09E-23 | 3  | #N/A | MGI:3696667 |
| RBBP7     | 6.95E-21 | 0.533717964 | 0.695 | 0.355 | 3.09E-16 | X  | #N/A | #N/A        |
| TBCA      | 7.50E-18 | 0.533241044 | 0.683 | 0.371 | 3.33E-13 | 5  | #N/A | #N/A        |
| PRDX5     | 5.25E-21 | 0.532404264 | 0.721 | 0.377 | 2.33E-16 | 11 | #N/A | #N/A        |
| GPX3      | 3.50E-18 | 0.531875374 | 0.179 | 0.035 | 1.56E-13 | 5  | #N/A | #N/A        |
| RHOB      | 2.25E-18 | 0.5318292   | 0.279 | 0.081 | 9.99E-14 | 2  | #N/A | #N/A        |
| HPRT1     | 1.12E-17 | 0.529664927 | 0.748 | 0.462 | 4.97E-13 | X  | YES  | MGI:3831277 |
| NDUFA7    | 1.07E-19 | 0.529456891 | 0.351 | 0.114 | 4.75E-15 | 19 | #N/A | #N/A        |
| TBCB      | 1.82E-23 | 0.528649159 | 0.485 | 0.173 | 8.10E-19 | 19 | #N/A | #N/A        |
| RPS11     | 1.64E-29 | 0.527226579 | 0.939 | 0.766 | 7.29E-25 | 19 | #N/A | #N/A        |
| STRAP     | 3.25E-21 | 0.527032469 | 0.424 | 0.15  | 1.44E-16 | 12 | #N/A | #N/A        |
| OAZ1      | 9.77E-25 | 0.526877197 | 0.908 | 0.603 | 4.34E-20 | 19 | #N/A | #N/A        |
| MIR4458HG | 3.72E-20 | 0.526060994 | 0.248 | 0.059 | 1.65E-15 | 5  | #N/A | #N/A        |
| RARRES2   | 3.24E-23 | 0.525761435 | 0.126 | 0.008 | 1.44E-18 | 7  | #N/A | #N/A        |
| MRFAP1    | 4.31E-19 | 0.525371763 | 0.706 | 0.389 | 1.92E-14 | 4  | #N/A | #N/A        |
| C7orf73   | 5.31E-17 | 0.524919035 | 0.672 | 0.379 | 2.36E-12 | 7  | #N/A | #N/A        |
| ANAPC13   | 4.17E-15 | 0.523962412 | 0.313 | 0.117 | 1.85E-10 | 3  | #N/A | #N/A        |
| PGLS      | 6.07E-22 | 0.523027931 | 0.359 | 0.109 | 2.70E-17 | 19 | #N/A | #N/A        |
| TCEAL8    | 2.21E-17 | 0.522670039 | 0.622 | 0.321 | 9.84E-13 | X  | YES  | #N/A        |
| UBE2E3    | 6.45E-22 | 0.522531637 | 0.519 | 0.206 | 2.87E-17 | 2  | #N/A | #N/A        |
| SMARCB1   | 2.94E-21 | 0.522229631 | 0.294 | 0.078 | 1.31E-16 | 22 | #N/A | MGI:2388033 |
| HMGCS2    | 2.28E-16 | 0.522051231 | 0.427 | 0.183 | 1.01E-11 | 1  | #N/A | MGI:6416129 |
| C19orf53  | 3.71E-16 | 0.521640212 | 0.515 | 0.245 | 1.65E-11 | 19 | #N/A | #N/A        |
| LGALS3BP  | 9.16E-12 | 0.52119749  | 0.244 | 0.092 | 4.07E-07 | 17 | #N/A | #N/A        |
| HMG1      | 2.92E-19 | 0.521145463 | 0.718 | 0.38  | 1.30E-14 | 21 | #N/A | #N/A        |
| RAP1B     | 1.03E-16 | 0.521058619 | 0.439 | 0.188 | 4.60E-12 | 12 | #N/A | MGI:3573929 |
| CYR61     | 6.76E-05 | 0.520858252 | 0.115 | 0.05  | 1        | 1  | #N/A | #N/A        |
| OSTF1     | 9.35E-21 | 0.520729557 | 0.34  | 0.104 | 4.16E-16 | 9  | #N/A | #N/A        |
| ALDH1A1   | 2.99E-21 | 0.520057302 | 0.866 | 0.559 | 1.33E-16 | 9  | #N/A | #N/A        |
| MRPL24    | 4.41E-22 | 0.519948946 | 0.252 | 0.055 | 1.96E-17 | 1  | #N/A | #N/A        |
| CMAS      | 1.02E-16 | 0.5155785   | 0.656 | 0.356 | 4.53E-12 | 12 | #N/A | #N/A        |
| TXN       | 6.75E-20 | 0.514538757 | 0.481 | 0.194 | 3.00E-15 | 9  | #N/A | #N/A        |
| RPL22L1   | 2.64E-15 | 0.513712163 | 0.252 | 0.079 | 1.17E-10 | 3  | #N/A | #N/A        |
| ARF4      | 5.30E-19 | 0.513451676 | 0.649 | 0.315 | 2.36E-14 | 3  | #N/A | #N/A        |
| HNRNPDL   | 6.80E-20 | 0.512163047 | 0.481 | 0.193 | 3.02E-15 | 4  | #N/A | #N/A        |
| LGALS3    | 3.78E-15 | 0.51210717  | 0.679 | 0.414 | 1.68E-10 | 14 | #N/A | #N/A        |
| GNG5      | 7.80E-18 | 0.51146347  | 0.721 | 0.397 | 3.47E-13 | 1  | #N/A | #N/A        |
| RPL32     | 7.45E-33 | 0.511251563 | 0.947 | 0.87  | 3.31E-28 | 3  | #N/A | #N/A        |
| BEX2      | 3.93E-18 | 0.510970719 | 0.66  | 0.347 | 1.75E-13 | X  | YES  | #N/A        |
| SNRPD2    | 3.03E-18 | 0.51057216  | 0.645 | 0.34  | 1.35E-13 | 19 | #N/A | #N/A        |
| MDH2      | 1.09E-16 | 0.510413061 | 0.477 | 0.21  | 4.83E-12 | 7  | #N/A | #N/A        |
| S100A13   | 6.38E-13 | 0.510043278 | 0.328 | 0.136 | 2.84E-08 | 1  | #N/A | #N/A        |
| UNC119    | 3.37E-18 | 0.509541676 | 0.473 | 0.201 | 1.50E-13 | 17 | #N/A | #N/A        |
| NAP1L1    | 2.60E-18 | 0.508941593 | 0.672 | 0.355 | 1.16E-13 | 12 | #N/A | #N/A        |
| NDUFS3    | 2.77E-25 | 0.507973079 | 0.431 | 0.134 | 1.23E-20 | 11 | #N/A | #N/A        |
| TMEM14B   | 1.95E-21 | 0.507933945 | 0.542 | 0.229 | 8.66E-17 | 6  | #N/A | #N/A        |
| PPP1CA    | 2.46E-21 | 0.507065923 | 0.37  | 0.118 | 1.09E-16 | 11 | #N/A | #N/A        |
| BTG3      | 1.64E-21 | 0.506943222 | 0.55  | 0.231 | 7.27E-17 | 21 | #N/A | #N/A        |
| NOP16     | 4.62E-21 | 0.506438149 | 0.183 | 0.029 | 2.05E-16 | 5  | #N/A | #N/A        |
| EDF1      | 3.99E-18 | 0.500771927 | 0.718 | 0.409 | 1.77E-13 | 9  | #N/A | #N/A        |
| COX6B1    | 1.88E-18 | 0.500653052 | 0.649 | 0.323 | 8.38E-14 | 19 | #N/A | #N/A        |
| NUDT11    | 2.63E-19 | 0.500212558 | 0.584 | 0.269 | 1.17E-14 | X  | YES  | #N/A        |
| SDHC      | 7.96E-17 | 0.49880844  | 0.431 | 0.181 | 3.54E-12 | 1  | #N/A | #N/A        |
| LDHB      | 2.95E-18 | 0.498665605 | 0.748 | 0.426 | 1.31E-13 | 12 | #N/A | #N/A        |
| HMG1      | 1.82E-18 | 0.497952498 | 0.664 | 0.336 | 8.08E-14 | 1  | #N/A | #N/A        |
| DAP       | 2.47E-18 | 0.49763722  | 0.21  | 0.047 | 1.10E-13 | 5  | #N/A | #N/A        |
| UQCRCF1   | 2.07E-20 | 0.497504535 | 0.607 | 0.277 | 9.20E-16 | 19 | #N/A | #N/A        |
| GATM      | 2.75E-17 | 0.497383502 | 0.592 | 0.285 | 1.22E-12 | 15 | #N/A | MGI:5465452 |
| RBM42     | 3.87E-19 | 0.496829387 | 0.309 | 0.093 | 1.72E-14 | 19 | #N/A | #N/A        |
| SLIRP     | 1.03E-18 | 0.496637325 | 0.576 | 0.266 | 4.58E-14 | 14 | #N/A | MGI:5538716 |
| ESD       | 5.12E-17 | 0.495665069 | 0.416 | 0.167 | 2.27E-12 | 13 | #N/A | #N/A        |
| TRIP6     | 2.59E-18 | 0.495646851 | 0.294 | 0.089 | 1.15E-13 | 7  | #N/A | #N/A        |
| MGP       | 1.11E-22 | 0.495053342 | 0.206 | 0.034 | 4.93E-18 | 12 | #N/A | #N/A        |
| CYC1      | 3.87E-22 | 0.49498136  | 0.366 | 0.111 | 1.72E-17 | 8  | #N/A | #N/A        |
| UBTD1     | 4.13E-18 | 0.494929297 | 0.424 | 0.168 | 1.84E-13 | 10 | #N/A | #N/A        |
| RNASE1    | 3.57E-14 | 0.494832495 | 0.885 | 0.646 | 1.59E-09 | 14 | #N/A | #N/A        |
| RPL11     | 9.40E-27 | 0.494497051 | 0.931 | 0.738 | 4.18E-22 | 1  | #N/A | #N/A        |
| PDHA1     | 1.32E-20 | 0.494320138 | 0.275 | 0.071 | 5.88E-16 | X  | YES  | MGI:2386703 |

|          |          |             |       |       |          |    |      |             |
|----------|----------|-------------|-------|-------|----------|----|------|-------------|
| NDFIP1   | 8.59E-18 | 0.49120646  | 0.466 | 0.193 | 3.82E-13 | 5  | #N/A | #N/A        |
| PEX2     | 1.39E-23 | 0.490984052 | 0.282 | 0.065 | 6.16E-19 | 8  | #N/A | #N/A        |
| DPM2     | 4.48E-19 | 0.490594494 | 0.275 | 0.077 | 1.99E-14 | 9  | #N/A | #N/A        |
| RPL30    | 8.64E-30 | 0.490522672 | 0.958 | 0.859 | 3.84E-25 | 8  | #N/A | #N/A        |
| IGFBP6   | 9.39E-27 | 0.490380294 | 0.164 | 0.013 | 4.18E-22 | 12 | #N/A | #N/A        |
| SDCBP    | 2.31E-18 | 0.489734795 | 0.439 | 0.171 | 1.03E-13 | 8  | #N/A | #N/A        |
| NDUFB7   | 1.90E-16 | 0.489660995 | 0.679 | 0.377 | 8.43E-12 | 19 | #N/A | #N/A        |
| DIABLO   | 8.99E-24 | 0.489252018 | 0.187 | 0.025 | 4.00E-19 | 12 | #N/A | #N/A        |
| SNRPF    | 2.08E-17 | 0.489050529 | 0.492 | 0.216 | 9.24E-13 | 12 | #N/A | #N/A        |
| HMGNS    | 4.15E-17 | 0.488696023 | 0.824 | 0.624 | 1.84E-12 | X  | YES  | #N/A        |
| MAP3K13  | 2.38E-18 | 0.488314063 | 0.427 | 0.169 | 1.06E-13 | 3  | #N/A | #N/A        |
| ITM2C    | 1.18E-16 | 0.487871082 | 0.202 | 0.049 | 5.24E-12 | 2  | #N/A | #N/A        |
| CYB5R1   | 9.78E-14 | 0.487104282 | 0.206 | 0.061 | 4.35E-09 | 1  | #N/A | #N/A        |
| DCTN6    | 1.95E-18 | 0.486962166 | 0.355 | 0.121 | 8.67E-14 | 8  | #N/A | #N/A        |
| TTC8     | 1.25E-15 | 0.486882482 | 0.317 | 0.115 | 5.55E-11 | 14 | #N/A | #N/A        |
| GADD45A  | 1.23E-09 | 0.486755896 | 0.16  | 0.052 | 5.47E-05 | 1  | #N/A | MGI:2182720 |
| PSME1    | 1.14E-16 | 0.486568433 | 0.271 | 0.082 | 5.06E-12 | 14 | #N/A | #N/A        |
| SUPT4H1  | 5.99E-18 | 0.486297686 | 0.42  | 0.164 | 2.66E-13 | 17 | #N/A | #N/A        |
| PRDX3    | 3.41E-18 | 0.485641693 | 0.489 | 0.21  | 1.52E-13 | 10 | #N/A | #N/A        |
| PLIN3    | 3.99E-17 | 0.485378199 | 0.29  | 0.092 | 1.77E-12 | 19 | #N/A | #N/A        |
| BEX4     | 5.07E-16 | 0.485211706 | 0.595 | 0.307 | 2.25E-11 | X  | YES  | #N/A        |
| ATF7IP2  | 1.56E-16 | 0.484245201 | 0.656 | 0.357 | 6.93E-12 | 16 | #N/A | #N/A        |
| SPG21    | 4.13E-17 | 0.483235986 | 0.336 | 0.118 | 1.84E-12 | 15 | #N/A | #N/A        |
| MLF2     | 1.30E-18 | 0.48271088  | 0.477 | 0.196 | 5.77E-14 | 12 | #N/A | #N/A        |
| LY6E     | 3.69E-27 | 0.482564343 | 0.218 | 0.03  | 1.64E-22 | 8  | #N/A | #N/A        |
| NEDD8    | 4.92E-17 | 0.481168963 | 0.668 | 0.354 | 2.19E-12 | 14 | #N/A | #N/A        |
| TRAF4    | 6.04E-16 | 0.480754684 | 0.179 | 0.04  | 2.68E-11 | 17 | #N/A | MGI:2182705 |
| SNRPD1   | 4.48E-16 | 0.480653433 | 0.45  | 0.195 | 1.99E-11 | 18 | #N/A | #N/A        |
| SPAG7    | 1.53E-17 | 0.480609766 | 0.401 | 0.151 | 6.82E-13 | 17 | #N/A | #N/A        |
| MVP      | 1.49E-15 | 0.479845311 | 0.366 | 0.144 | 6.62E-11 | 16 | #N/A | #N/A        |
| FAM96B   | 1.47E-15 | 0.479324556 | 0.615 | 0.319 | 6.53E-11 | 16 | #N/A | #N/A        |
| PRDX6    | 7.38E-23 | 0.478868147 | 0.893 | 0.683 | 3.28E-18 | 1  | #N/A | #N/A        |
| ACYP2    | 1.08E-23 | 0.478842037 | 0.302 | 0.073 | 4.80E-19 | 2  | #N/A | #N/A        |
| COA3     | 1.43E-16 | 0.478703685 | 0.336 | 0.12  | 6.36E-12 | 17 | #N/A | #N/A        |
| TPGS1    | 8.70E-17 | 0.478151772 | 0.317 | 0.109 | 3.87E-12 | 19 | #N/A | MGI:2388468 |
| SRP14    | 2.94E-20 | 0.476846267 | 0.87  | 0.644 | 1.31E-15 | 15 | #N/A | #N/A        |
| WDR13    | 1.48E-14 | 0.47616831  | 0.225 | 0.067 | 6.57E-10 | X  | YES  | #N/A        |
| HNRNPK   | 8.78E-16 | 0.476084284 | 0.557 | 0.278 | 3.90E-11 | 9  | #N/A | #N/A        |
| PUF60    | 1.61E-19 | 0.475682124 | 0.37  | 0.126 | 7.14E-15 | 8  | #N/A | #N/A        |
| WDR83OS  | 5.08E-18 | 0.475639174 | 0.683 | 0.359 | 2.26E-13 | 19 | #N/A | #N/A        |
| MGST2    | 4.77E-14 | 0.475316516 | 0.466 | 0.214 | 2.12E-09 | 4  | #N/A | #N/A        |
| NME4     | 2.39E-18 | 0.475173975 | 0.397 | 0.147 | 1.06E-13 | 16 | #N/A | #N/A        |
| LAMTOR5  | 5.84E-17 | 0.474832602 | 0.573 | 0.277 | 2.59E-12 | 1  | #N/A | #N/A        |
| GRHPR    | 2.83E-15 | 0.474219495 | 0.553 | 0.282 | 1.26E-10 | 9  | #N/A | #N/A        |
| HIST1H4C | 8.07E-16 | 0.471589526 | 0.397 | 0.162 | 3.59E-11 | 6  | #N/A | #N/A        |
| TIMM17B  | 5.72E-15 | 0.471545209 | 0.271 | 0.09  | 2.54E-10 | X  | YES  | #N/A        |
| SUMO2    | 1.05E-15 | 0.471519377 | 0.756 | 0.488 | 4.67E-11 | 17 | #N/A | #N/A        |
| CTSD     | 3.38E-11 | 0.471146469 | 0.309 | 0.135 | 1.50E-06 | 11 | #N/A | #N/A        |
| EIF3H    | 9.40E-18 | 0.471076005 | 0.607 | 0.291 | 4.18E-13 | 8  | #N/A | MGI:5514383 |
| SKP1     | 1.54E-22 | 0.470777367 | 0.889 | 0.621 | 6.84E-18 | 5  | #N/A | #N/A        |
| RPL19    | 4.63E-28 | 0.470639493 | 0.958 | 0.792 | 2.06E-23 | 17 | #N/A | #N/A        |
| TSC22D4  | 6.09E-17 | 0.470222055 | 0.366 | 0.136 | 2.71E-12 | 7  | #N/A | #N/A        |
| DAP3     | 8.39E-13 | 0.468894283 | 0.347 | 0.151 | 3.73E-08 | 1  | #N/A | #N/A        |
| RPS14    | 9.81E-34 | 0.468741576 | 1     | 0.872 | 4.36E-29 | 5  | #N/A | #N/A        |
| KDELRL1  | 3.59E-17 | 0.467886832 | 0.385 | 0.148 | 1.59E-12 | 19 | #N/A | #N/A        |
| EIF3L    | 2.04E-15 | 0.467536173 | 0.397 | 0.166 | 9.05E-11 | 22 | #N/A | #N/A        |
| CD9      | 9.36E-19 | 0.467381767 | 0.153 | 0.023 | 4.16E-14 | 12 | #N/A | MGI:2180795 |
| CTSC     | 9.78E-16 | 0.467048295 | 0.172 | 0.038 | 4.35E-11 | 11 | #N/A | #N/A        |
| CFD      | 2.68E-29 | 0.466726364 | 0.179 | 0.014 | 1.19E-24 | 19 | #N/A | #N/A        |
| MARCKSL1 | 1.83E-18 | 0.466098523 | 0.855 | 0.575 | 8.14E-14 | 1  | #N/A | MGI:2176278 |
| SUSD3    | 8.50E-13 | 0.464611241 | 0.641 | 0.373 | 3.78E-08 | 9  | #N/A | #N/A        |
| SNRPB2   | 1.18E-16 | 0.464458102 | 0.393 | 0.155 | 5.24E-12 | 20 | #N/A | #N/A        |
| NFKBIA   | 1.01E-10 | 0.464123603 | 0.294 | 0.126 | 4.50E-06 | 14 | #N/A | #N/A        |
| LSM7     | 1.90E-14 | 0.462962394 | 0.469 | 0.219 | 8.43E-10 | 19 | #N/A | #N/A        |
| EMD      | 1.40E-15 | 0.462333885 | 0.26  | 0.082 | 6.21E-11 | X  | YES  | #N/A        |
| ATP5G3   | 6.59E-17 | 0.461924149 | 0.672 | 0.355 | 2.93E-12 | 2  | #N/A | #N/A        |
| TMEM70   | 6.29E-14 | 0.461255841 | 0.374 | 0.161 | 2.80E-09 | 8  | #N/A | #N/A        |
| PFDN1    | 8.64E-18 | 0.460114856 | 0.378 | 0.137 | 3.84E-13 | 5  | #N/A | #N/A        |
| CHCHD2   | 1.18E-15 | 0.45973605  | 0.767 | 0.491 | 5.22E-11 | 7  | #N/A | #N/A        |
| RAC3     | 1.52E-16 | 0.457708195 | 0.256 | 0.076 | 6.74E-12 | 17 | #N/A | #N/A        |
| MYL12B   | 2.38E-16 | 0.457433151 | 0.817 | 0.567 | 1.06E-11 | 18 | #N/A | #N/A        |
| PYURF    | 2.42E-19 | 0.457328433 | 0.511 | 0.212 | 1.08E-14 | 4  | #N/A | #N/A        |
| MORF4L2  | 8.02E-16 | 0.456879813 | 0.531 | 0.25  | 3.57E-11 | X  | YES  | #N/A        |
| CD63     | 8.11E-14 | 0.456353262 | 0.729 | 0.421 | 3.60E-09 | 12 | #N/A | #N/A        |
| RPS9     | 1.81E-23 | 0.455858977 | 0.931 | 0.739 | 8.05E-19 | 19 | #N/A | #N/A        |

|          |          |             |       |       |             |    |      |             |
|----------|----------|-------------|-------|-------|-------------|----|------|-------------|
| PFKL     | 2.30E-14 | 0.455451645 | 0.42  | 0.187 | 1.02E-09    | 21 | #N/A | #N/A        |
| SSR3     | 3.28E-15 | 0.455235823 | 0.466 | 0.214 | 1.46E-10    | 3  | #N/A | #N/A        |
| SAT1     | 2.05E-15 | 0.454060616 | 0.798 | 0.49  | 9.13E-11    | X  | YES  | MGI:3521903 |
| GAS6     | 5.36E-11 | 0.453816907 | 0.393 | 0.192 | 2.38E-06    | 13 | #N/A | #N/A        |
| CKB      | 6.09E-16 | 0.453352235 | 0.844 | 0.633 | 2.71E-11    | 14 | #N/A | #N/A        |
| PRR13    | 1.23E-17 | 0.453201875 | 0.317 | 0.104 | 5.45E-13    | 12 | #N/A | #N/A        |
| RPS7     | 4.39E-21 | 0.452184778 | 0.901 | 0.656 | 1.95E-16    | 2  | #N/A | #N/A        |
| NDUFB8   | 9.59E-18 | 0.452179536 | 0.58  | 0.27  | 4.26E-13    | 10 | #N/A | #N/A        |
| KCTD13   | 9.28E-19 | 0.451480784 | 0.382 | 0.137 | 4.12E-14    | 16 | #N/A | #N/A        |
| MDH1     | 2.48E-15 | 0.450742567 | 0.538 | 0.266 | 1.10E-10    | 2  | #N/A | #N/A        |
| CALR     | 1.13E-10 | 0.44855578  | 0.324 | 0.15  | 5.01E-06    | 19 | #N/A | #N/A        |
| QSOX1    | 6.34E-07 | 0.448375037 | 0.191 | 0.087 | 0.028202422 | 1  | #N/A | #N/A        |
| GNB2     | 2.20E-15 | 0.448204118 | 0.424 | 0.184 | 9.76E-11    | 7  | #N/A | #N/A        |
| ACO2     | 3.34E-17 | 0.446964773 | 0.317 | 0.106 | 1.49E-12    | 22 | #N/A | #N/A        |
| NONO     | 5.73E-14 | 0.446774085 | 0.282 | 0.103 | 2.55E-09    | X  | YES  | #N/A        |
| MAGED1   | 3.84E-15 | 0.446642101 | 0.454 | 0.204 | 1.71E-10    | X  | YES  | #N/A        |
| RAB11B   | 1.91E-14 | 0.445561374 | 0.267 | 0.09  | 8.48E-10    | 19 | #N/A | #N/A        |
| EIF4A2   | 1.51E-13 | 0.445461435 | 0.622 | 0.334 | 6.73E-09    | 3  | #N/A | #N/A        |
| DKK3     | 5.12E-10 | 0.44408708  | 0.275 | 0.121 | 2.27E-05    | 11 | #N/A | #N/A        |
| SDHD     | 3.76E-12 | 0.444063792 | 0.302 | 0.121 | 1.67E-07    | 11 | #N/A | #N/A        |
| AP3S1    | 8.44E-16 | 0.443999038 | 0.473 | 0.21  | 3.75E-11    | 5  | #N/A | #N/A        |
| RPL8     | 4.96E-19 | 0.442664632 | 0.87  | 0.639 | 2.21E-14    | 8  | #N/A | #N/A        |
| TPM4     | 1.34E-14 | 0.44209604  | 0.374 | 0.154 | 5.96E-10    | 19 | #N/A | #N/A        |
| TMEM97   | 8.05E-16 | 0.439933438 | 0.412 | 0.169 | 3.58E-11    | 17 | #N/A | MGI:5548577 |
| MRPL4    | 1.35E-17 | 0.439889357 | 0.359 | 0.127 | 5.98E-13    | 19 | #N/A | #N/A        |
| ZFP36L2  | 2.36E-12 | 0.439659971 | 0.137 | 0.031 | 1.05E-07    | 2  | #N/A | MGI:3578661 |
| PSMA5    | 1.26E-14 | 0.439215237 | 0.427 | 0.189 | 5.59E-10    | 1  | #N/A | #N/A        |
| UQCRC2   | 4.00E-13 | 0.438394232 | 0.309 | 0.122 | 1.78E-08    | 16 | #N/A | #N/A        |
| SNAPIN   | 5.83E-17 | 0.438057682 | 0.271 | 0.081 | 2.59E-12    | 1  | #N/A | #N/A        |
| WFDC6    | 7.60E-16 | 0.437039337 | 0.336 | 0.123 | 3.38E-11    | 20 | #N/A | #N/A        |
| NPTN     | 3.44E-10 | 0.435459068 | 0.225 | 0.089 | 1.53E-05    | 15 | #N/A | #N/A        |
| EIF3I    | 1.96E-18 | 0.435353312 | 0.458 | 0.181 | 8.73E-14    | 1  | #N/A | #N/A        |
| UBE2L3   | 1.58E-15 | 0.434942239 | 0.546 | 0.263 | 7.04E-11    | 22 | #N/A | #N/A        |
| DHRS4L2  | 3.71E-13 | 0.434833944 | 0.26  | 0.09  | 1.65E-08    | 14 | #N/A | #N/A        |
| MRPL37   | 3.36E-15 | 0.43399933  | 0.267 | 0.087 | 1.50E-10    | 1  | #N/A | #N/A        |
| ATP5H    | 2.84E-16 | 0.433800148 | 0.511 | 0.235 | 1.26E-11    | 17 | #N/A | #N/A        |
| CETN2    | 1.68E-16 | 0.432882459 | 0.298 | 0.096 | 7.48E-12    | X  | YES  | MGI:5634782 |
| NDUFA6   | 3.99E-13 | 0.43114382  | 0.435 | 0.202 | 1.78E-08    | 22 | #N/A | #N/A        |
| JTB      | 1.48E-15 | 0.430890748 | 0.477 | 0.214 | 6.56E-11    | 1  | #N/A | #N/A        |
| PPIF     | 6.33E-16 | 0.429494547 | 0.489 | 0.217 | 2.81E-11    | 10 | #N/A | #N/A        |
| CFL2     | 3.04E-12 | 0.427836226 | 0.351 | 0.153 | 1.35E-07    | 14 | #N/A | #N/A        |
| CAMK1    | 2.82E-18 | 0.427015753 | 0.473 | 0.189 | 1.26E-13    | 3  | #N/A | #N/A        |
| ALDH9A1  | 2.88E-14 | 0.426654585 | 0.534 | 0.263 | 1.28E-09    | 1  | #N/A | #N/A        |
| GDI2     | 1.26E-16 | 0.425626059 | 0.389 | 0.151 | 5.61E-12    | 10 | #N/A | #N/A        |
| NINJ1    | 1.28E-13 | 0.42519045  | 0.363 | 0.152 | 5.69E-09    | 9  | #N/A | #N/A        |
| NPC2     | 1.18E-12 | 0.424432742 | 0.5   | 0.254 | 5.24E-08    | 14 | #N/A | #N/A        |
| PSMB5    | 1.65E-13 | 0.423228624 | 0.473 | 0.226 | 7.34E-09    | 14 | #N/A | #N/A        |
| C14orf2  | 3.27E-14 | 0.422977246 | 0.668 | 0.386 | 1.46E-09    | 14 | #N/A | #N/A        |
| MYH9     | 9.63E-20 | 0.421843642 | 0.115 | 0.008 | 4.28E-15    | 22 | #N/A | #N/A        |
| IMPDH2   | 2.90E-16 | 0.421641095 | 0.179 | 0.039 | 1.29E-11    | 3  | #N/A | #N/A        |
| PRELID1  | 8.83E-15 | 0.421623951 | 0.42  | 0.18  | 3.92E-10    | 5  | #N/A | #N/A        |
| CCDC28B  | 6.49E-12 | 0.420069075 | 0.588 | 0.341 | 2.89E-07    | 1  | #N/A | #N/A        |
| INSL3    | 7.84E-31 | 0.419256265 | 0.206 | 0.02  | 3.48E-26    | 19 | #N/A | #N/A        |
| UQCRC1   | 2.14E-12 | 0.418949679 | 0.347 | 0.151 | 9.51E-08    | 3  | #N/A | #N/A        |
| SNHG9    | 4.20E-10 | 0.418282938 | 0.187 | 0.065 | 1.87E-05    | 16 | #N/A | #N/A        |
| POLR2K   | 6.14E-15 | 0.416778968 | 0.416 | 0.175 | 2.73E-10    | 8  | #N/A | #N/A        |
| PPA1     | 1.07E-13 | 0.416770083 | 0.66  | 0.377 | 4.76E-09    | 10 | #N/A | #N/A        |
| DGUOK    | 1.33E-16 | 0.414629331 | 0.447 | 0.185 | 5.93E-12    | 2  | #N/A | MGI:6111949 |
| LLPH     | 1.57E-17 | 0.414271152 | 0.401 | 0.151 | 6.96E-13    | 12 | #N/A | #N/A        |
| BAD      | 9.63E-13 | 0.414243365 | 0.298 | 0.117 | 4.28E-08    | 11 | #N/A | MGI:2675966 |
| PNCK     | 4.65E-10 | 0.412613547 | 0.164 | 0.052 | 2.07E-05    | X  | YES  | #N/A        |
| ADIPOR1  | 3.87E-13 | 0.412382164 | 0.317 | 0.129 | 1.72E-08    | 1  | #N/A | #N/A        |
| DLD      | 5.20E-17 | 0.412292883 | 0.248 | 0.069 | 2.31E-12    | 7  | #N/A | #N/A        |
| RPL3     | 5.80E-28 | 0.411643561 | 0.992 | 0.911 | 2.58E-23    | 22 | #N/A | #N/A        |
| THEMIS2  | 4.62E-16 | 0.411303674 | 0.401 | 0.161 | 2.05E-11    | 1  | #N/A | #N/A        |
| ENSA     | 2.03E-14 | 0.411161333 | 0.233 | 0.071 | 9.02E-10    | 1  | #N/A | #N/A        |
| CAMTA1   | 3.03E-14 | 0.410913759 | 0.538 | 0.269 | 1.35E-09    | 1  | #N/A | MGI:5637357 |
| NR4A1    | 2.24E-07 | 0.41051078  | 0.134 | 0.047 | 0.009969976 | 12 | #N/A | MGI:2182325 |
| GOLGA7   | 2.80E-14 | 0.410162339 | 0.363 | 0.147 | 1.25E-09    | 8  | #N/A | #N/A        |
| MYLK     | 7.40E-14 | 0.409936483 | 0.405 | 0.177 | 3.29E-09    | 3  | #N/A | #N/A        |
| HIBADH   | 1.02E-10 | 0.409198627 | 0.271 | 0.112 | 4.55E-06    | 7  | #N/A | #N/A        |
| HNRNPC   | 4.27E-16 | 0.408380648 | 0.553 | 0.259 | 1.90E-11    | 14 | #N/A | #N/A        |
| FBL      | 2.71E-15 | 0.408353495 | 0.71  | 0.398 | 1.21E-10    | 19 | #N/A | #N/A        |
| CAPN5    | 9.76E-19 | 0.407955374 | 0.233 | 0.056 | 4.34E-14    | 11 | #N/A | #N/A        |
| PPP1R14A | 4.75E-13 | 0.407465889 | 0.779 | 0.525 | 2.11E-08    | 19 | #N/A | #N/A        |

|            |             |             |       |       |             |    |      |             |
|------------|-------------|-------------|-------|-------|-------------|----|------|-------------|
| DDX47      | 1.30E-26    | 0.407288646 | 0.145 | 0.008 | 5.78E-22    | 12 | #N/A | #N/A        |
| HMGB2      | 5.14E-13    | 0.406465228 | 0.462 | 0.222 | 2.29E-08    | 4  | #N/A | MGI:2387671 |
| CDC123     | 1.03E-19    | 0.406301749 | 0.282 | 0.076 | 4.56E-15    | 10 | #N/A | #N/A        |
| RHOG       | 2.38E-19    | 0.406286147 | 0.172 | 0.028 | 1.06E-14    | 11 | #N/A | #N/A        |
| CMTM3      | 8.54E-16    | 0.405903611 | 0.416 | 0.174 | 3.80E-11    | 16 | #N/A | #N/A        |
| COPE       | 2.04E-22    | 0.405889781 | 0.969 | 0.81  | 9.08E-18    | 19 | #N/A | #N/A        |
| EEF2       | 4.78E-14    | 0.405880006 | 0.756 | 0.441 | 2.13E-09    | 19 | #N/A | #N/A        |
| RGS5       | 1.54E-13    | 0.405371356 | 0.294 | 0.109 | 6.82E-09    | 1  | #N/A | #N/A        |
| AHSA1      | 1.02E-13    | 0.404174137 | 0.637 | 0.348 | 4.55E-09    | 14 | #N/A | #N/A        |
| SLC39A4    | 2.91E-15    | 0.40395955  | 0.202 | 0.052 | 1.29E-10    | 8  | #N/A | MGI:5582434 |
| STOML2     | 1.86E-12    | 0.403950407 | 0.37  | 0.165 | 8.29E-08    | 9  | #N/A | MGI:4881090 |
| ARPC4      | 7.14E-14    | 0.403649163 | 0.347 | 0.139 | 3.18E-09    | 3  | #N/A | #N/A        |
| CTNNB1     | 3.39E-13    | 0.403612735 | 0.248 | 0.086 | 1.51E-08    | 3  | #N/A | MGI:3039783 |
| PTS        | 2.18E-14    | 0.403569309 | 0.294 | 0.105 | 9.71E-10    | 11 | #N/A | MGI:2669828 |
| RAP1A      | 2.64E-14    | 0.403482963 | 0.263 | 0.088 | 1.17E-09    | 1  | #N/A | #N/A        |
| PAGR1      | 1.41E-19    | 0.403124204 | 0.13  | 0.013 | 6.25E-15    | 16 | #N/A | #N/A        |
| PES1       | 8.67E-15    | 0.402845666 | 0.206 | 0.056 | 3.85E-10    | 22 | #N/A | #N/A        |
| RBX1       | 1.03E-12    | 0.402125578 | 0.611 | 0.338 | 4.59E-08    | 22 | #N/A | #N/A        |
| MAPRE1     | 3.38E-12    | 0.401447198 | 0.397 | 0.185 | 1.50E-07    | 20 | #N/A | #N/A        |
| BCAP31     | 3.74E-11    | 0.401092146 | 0.313 | 0.137 | 1.66E-06    | X  | YES  | #N/A        |
| MALAT1     | 0.394724372 | 0.400718936 | 0.668 | 0.54  | 1           | 11 | #N/A | #N/A        |
| APOBEC3C   | 8.87E-12    | 0.400090964 | 0.378 | 0.177 | 3.94E-07    | 22 | #N/A | #N/A        |
| C18orf32   | 1.24E-22    | 0.399934562 | 0.313 | 0.08  | 5.50E-18    | 18 | #N/A | #N/A        |
| ST3GAL4    | 1.18E-11    | 0.399738699 | 0.279 | 0.111 | 5.23E-07    | 11 | #N/A | #N/A        |
| PARK7      | 2.10E-16    | 0.399550122 | 0.702 | 0.377 | 9.35E-12    | 1  | #N/A | #N/A        |
| PSME2      | 1.45E-11    | 0.397872123 | 0.282 | 0.113 | 6.46E-07    | 14 | #N/A | #N/A        |
| LINC00116  | 4.91E-12    | 0.397465091 | 0.309 | 0.127 | 2.18E-07    | 2  | #N/A | #N/A        |
| TGIF1      | 1.28E-16    | 0.396929458 | 0.263 | 0.078 | 5.68E-12    | 18 | #N/A | MGI:3577049 |
| SNX17      | 1.48E-15    | 0.396462948 | 0.294 | 0.099 | 6.57E-11    | 2  | #N/A | #N/A        |
| AP1S2      | 2.39E-11    | 0.396315036 | 0.382 | 0.184 | 1.06E-06    | X  | #N/A | #N/A        |
| HSD17B3    | 8.53E-14    | 0.3961751   | 0.24  | 0.077 | 3.79E-09    | 9  | #N/A | #N/A        |
| JAM2       | 1.65E-10    | 0.396110806 | 0.332 | 0.154 | 7.33E-06    | 21 | #N/A | #N/A        |
| MBNL3      | 1.33E-15    | 0.396078299 | 0.519 | 0.244 | 5.92E-11    | X  | YES  | #N/A        |
| PPP1R16A   | 3.24E-08    | 0.395544046 | 0.294 | 0.142 | 0.001441614 | 8  | #N/A | #N/A        |
| ATP1A1     | 3.64E-08    | 0.395139906 | 0.37  | 0.198 | 0.00161976  | 1  | #N/A | #N/A        |
| PCBP1      | 1.43E-14    | 0.394415436 | 0.42  | 0.178 | 6.36E-10    | 2  | #N/A | #N/A        |
| SMARCE1    | 1.98E-11    | 0.393997047 | 0.237 | 0.088 | 8.81E-07    | 17 | #N/A | #N/A        |
| PTGES      | 3.52E-05    | 0.393325913 | 0.137 | 0.064 | 1           | 9  | #N/A | #N/A        |
| PLIN2      | 1.77E-09    | 0.392639564 | 0.298 | 0.138 | 7.85E-05    | 9  | #N/A | MGI:3529131 |
| GADD45GIP1 | 2.83E-13    | 0.392386886 | 0.424 | 0.191 | 1.26E-08    | 19 | #N/A | #N/A        |
| SRA1       | 3.72E-15    | 0.392164238 | 0.263 | 0.084 | 1.65E-10    | 5  | #N/A | #N/A        |
| UROD       | 1.61E-12    | 0.391926517 | 0.355 | 0.152 | 7.18E-08    | 1  | #N/A | #N/A        |
| UQCR10     | 3.26E-15    | 0.391260141 | 0.809 | 0.556 | 1.45E-10    | 22 | #N/A | #N/A        |
| SARNP      | 2.52E-16    | 0.390369161 | 0.214 | 0.054 | 1.12E-11    | 12 | #N/A | #N/A        |
| AKR7A2     | 8.45E-12    | 0.390363044 | 0.374 | 0.17  | 3.75E-07    | 1  | #N/A | MGI:3527218 |
| IER2       | 2.97E-11    | 0.390036922 | 0.16  | 0.044 | 1.32E-06    | 19 | #N/A | #N/A        |
| CSNK2B     | 2.18E-12    | 0.389654081 | 0.458 | 0.223 | 9.69E-08    | 6  | #N/A | #N/A        |
| UBB        | 1.00E-25    | 0.389165976 | 0.977 | 0.908 | 4.46E-21    | 17 | #N/A | azoospermia |
| PCBD1      | 5.91E-15    | 0.388997388 | 0.473 | 0.212 | 2.63E-10    | 10 | #N/A | #N/A        |
| PRND       | 1.55E-07    | 0.388865829 | 0.359 | 0.202 | 0.006902883 | 20 | #N/A | MGI:3047561 |
| ARHGDI1A   | 3.36E-20    | 0.387667332 | 0.309 | 0.088 | 1.50E-15    | 17 | #N/A | MGI:3613573 |
| GPC1       | 1.21E-09    | 0.387477484 | 0.183 | 0.065 | 5.40E-05    | 2  | #N/A | #N/A        |
| U2AF2      | 8.66E-12    | 0.387141608 | 0.237 | 0.086 | 3.85E-07    | 19 | #N/A | #N/A        |
| NDUFS2     | 8.52E-18    | 0.386801302 | 0.447 | 0.176 | 3.79E-13    | 1  | #N/A | #N/A        |
| HSPA8      | 3.55E-10    | 0.386702504 | 0.595 | 0.338 | 1.58E-05    | 11 | #N/A | #N/A        |
| ETFB       | 1.81E-11    | 0.386579709 | 0.496 | 0.263 | 8.06E-07    | 19 | #N/A | #N/A        |
| ZBTB80S    | 1.20E-12    | 0.385915937 | 0.305 | 0.121 | 5.32E-08    | 1  | #N/A | #N/A        |
| VAT1       | 8.82E-12    | 0.385637789 | 0.309 | 0.129 | 3.92E-07    | 17 | #N/A | #N/A        |
| GSTP1      | 7.18E-13    | 0.385552204 | 0.351 | 0.147 | 3.19E-08    | 11 | #N/A | #N/A        |
| BEX5       | 1.24E-12    | 0.38528892  | 0.42  | 0.196 | 5.52E-08    | X  | YES  | #N/A        |
| AAMP       | 1.12E-13    | 0.384483457 | 0.305 | 0.115 | 4.99E-09    | 2  | #N/A | #N/A        |
| YWHAQ      | 2.94E-14    | 0.384312129 | 0.626 | 0.346 | 1.31E-09    | 2  | #N/A | #N/A        |
| RAB18      | 7.65E-13    | 0.384060653 | 0.366 | 0.159 | 3.40E-08    | 10 | #N/A | MGI:5698701 |
| HEBP1      | 1.48E-11    | 0.383894929 | 0.363 | 0.166 | 6.58E-07    | 12 | #N/A | #N/A        |
| RHOA       | 1.27E-14    | 0.383683971 | 0.469 | 0.212 | 5.65E-10    | 3  | #N/A | #N/A        |
| PERP       | 3.34E-07    | 0.383214727 | 0.141 | 0.053 | 0.014858401 | 6  | #N/A | #N/A        |
| DAPL1      | 7.58E-19    | 0.382065449 | 0.145 | 0.019 | 3.37E-14    | 2  | #N/A | #N/A        |
| BET1       | 5.45E-12    | 0.382061833 | 0.172 | 0.048 | 2.42E-07    | 7  | #N/A | #N/A        |
| SESN1      | 3.06E-08    | 0.381932508 | 0.363 | 0.197 | 0.001361305 | 6  | #N/A | #N/A        |
| ZNF428     | 1.83E-14    | 0.381128693 | 0.439 | 0.194 | 8.12E-10    | 19 | #N/A | #N/A        |
| EEF1B2     | 9.34E-13    | 0.380979668 | 0.84  | 0.586 | 4.15E-08    | 2  | #N/A | #N/A        |
| AP2S1      | 1.14E-11    | 0.380977101 | 0.653 | 0.391 | 5.05E-07    | 19 | #N/A | MGI:5754583 |
| TMEM167A   | 2.48E-14    | 0.380527856 | 0.366 | 0.15  | 1.10E-09    | 5  | #N/A | #N/A        |
| CDC37      | 1.41E-10    | 0.380226573 | 0.355 | 0.169 | 6.26E-06    | 19 | #N/A | #N/A        |
| NHP2       | 4.84E-09    | 0.380079261 | 0.359 | 0.181 | 0.000215346 | 5  | #N/A | #N/A        |



|           |             |             |       |       |             |    |      |             |
|-----------|-------------|-------------|-------|-------|-------------|----|------|-------------|
| OSTC      | 4.70E-12    | 0.379860423 | 0.363 | 0.161 | 2.09E-07    | 4  | #N/A | #N/A        |
| PPP4C     | 4.31E-15    | 0.379667688 | 0.42  | 0.178 | 1.92E-10    | 16 | #N/A | #N/A        |
| PYM1      | 1.77E-15    | 0.379000391 | 0.305 | 0.105 | 7.86E-11    | 12 | #N/A | #N/A        |
| SQSTM1    | 3.91E-12    | 0.378590535 | 0.336 | 0.146 | 1.74E-07    | 5  | #N/A | #N/A        |
| GRN       | 7.29E-05    | 0.378526645 | 0.134 | 0.063 | 1           | 17 | #N/A | MGI:3762618 |
| ATP6V0D1  | 2.12E-12    | 0.37736121  | 0.221 | 0.073 | 9.44E-08    | 16 | #N/A | MGI:5605751 |
| C9orf16   | 1.54E-13    | 0.377057944 | 0.447 | 0.211 | 6.87E-09    | 9  | #N/A | #N/A        |
| HPS3      | 5.26E-14    | 0.376916317 | 0.195 | 0.053 | 2.34E-09    | 3  | #N/A | #N/A        |
| PSMA7     | 1.15E-13    | 0.375401572 | 0.664 | 0.366 | 5.12E-09    | 20 | #N/A | #N/A        |
| EIF2A     | 1.33E-10    | 0.374833228 | 0.179 | 0.058 | 5.93E-06    | 3  | #N/A | #N/A        |
| MAGED2    | 9.68E-11    | 0.374325794 | 0.435 | 0.221 | 4.30E-06    | X  | YES  | #N/A        |
| COPZ1     | 6.60E-13    | 0.374105824 | 0.233 | 0.077 | 2.93E-08    | 12 | #N/A | #N/A        |
| RABGGTB   | 1.17E-17    | 0.373978021 | 0.252 | 0.068 | 5.19E-13    | 1  | #N/A | #N/A        |
| H3F3A     | 1.65E-16    | 0.373479783 | 0.908 | 0.742 | 7.35E-12    | 1  | #N/A | #N/A        |
| CARD19    | 8.68E-12    | 0.372873698 | 0.347 | 0.152 | 3.86E-07    | 9  | #N/A | #N/A        |
| TMED2     | 7.32E-11    | 0.372823608 | 0.24  | 0.092 | 3.25E-06    | 12 | #N/A | #N/A        |
| PMF1      | 3.83E-11    | 0.372682707 | 0.16  | 0.045 | 1.70E-06    | 1  | #N/A | #N/A        |
| CNDP2     | 2.18E-13    | 0.372561091 | 0.172 | 0.043 | 9.69E-09    | 18 | #N/A | #N/A        |
| PLEKHB1   | 4.71E-20    | 0.371498692 | 0.206 | 0.04  | 2.10E-15    | 11 | #N/A | #N/A        |
| HHLA3     | 1.66E-13    | 0.371402392 | 0.176 | 0.044 | 7.36E-09    | 1  | #N/A | #N/A        |
| MID1IP1   | 3.19E-12    | 0.370248517 | 0.431 | 0.207 | 1.42E-07    | X  | YES  | #N/A        |
| POLR2F    | 3.36E-10    | 0.370154622 | 0.401 | 0.202 | 1.49E-05    | 22 | #N/A | #N/A        |
| GDI1      | 2.94E-15    | 0.369854603 | 0.218 | 0.06  | 1.31E-10    | X  | YES  | #N/A        |
| ATF4      | 1.76E-13    | 0.369824871 | 0.328 | 0.129 | 7.83E-09    | 22 | #N/A | MGI:2445679 |
| SLC3A2    | 8.72E-11    | 0.369798759 | 0.328 | 0.145 | 3.88E-06    | 11 | #N/A | #N/A        |
| TPD52L2   | 2.77E-08    | 0.369353313 | 0.187 | 0.074 | 0.001229609 | 20 | #N/A | #N/A        |
| TP53      | 2.96E-15    | 0.369094617 | 0.149 | 0.028 | 1.31E-10    | 17 | #N/A | MGI:5523909 |
| CYCS      | 2.36E-12    | 0.369090542 | 0.592 | 0.319 | 1.05E-07    | 7  | #N/A | #N/A        |
| VPS29     | 5.27E-12    | 0.368709306 | 0.355 | 0.158 | 2.34E-07    | 12 | #N/A | #N/A        |
| RRAGA     | 4.96E-15    | 0.367829817 | 0.267 | 0.087 | 2.21E-10    | 9  | #N/A | #N/A        |
| CTSA      | 1.44E-07    | 0.367609167 | 0.126 | 0.042 | 0.006383193 | 20 | #N/A | #N/A        |
| ATP5O     | 1.14E-13    | 0.367485581 | 0.607 | 0.331 | 5.05E-09    | 21 | #N/A | #N/A        |
| MANBAL    | 5.52E-13    | 0.367121934 | 0.21  | 0.064 | 2.46E-08    | 20 | #N/A | #N/A        |
| PEF1      | 5.36E-12    | 0.366703445 | 0.267 | 0.101 | 2.38E-07    | 1  | #N/A | #N/A        |
| EIF3M     | 6.36E-13    | 0.366586299 | 0.504 | 0.247 | 2.83E-08    | 11 | #N/A | #N/A        |
| HINT2     | 1.19E-10    | 0.36644583  | 0.355 | 0.165 | 5.30E-06    | 9  | #N/A | #N/A        |
| THNSL2    | 5.48E-14    | 0.366085485 | 0.237 | 0.074 | 2.44E-09    | 2  | #N/A | #N/A        |
| EEF1D     | 1.20E-12    | 0.365872051 | 0.66  | 0.368 | 5.34E-08    | 8  | #N/A | #N/A        |
| OCIAD1    | 3.60E-15    | 0.365749706 | 0.42  | 0.177 | 1.60E-10    | 4  | #N/A | #N/A        |
| SEC61B    | 2.87E-12    | 0.365694842 | 0.595 | 0.327 | 1.27E-07    | 9  | #N/A | #N/A        |
| HINT1     | 9.18E-10    | 0.365496912 | 0.706 | 0.492 | 4.08E-05    | 5  | #N/A | #N/A        |
| PSMA3     | 6.61E-10    | 0.365153396 | 0.424 | 0.216 | 2.94E-05    | 14 | #N/A | #N/A        |
| PSMD9     | 7.40E-17    | 0.364845665 | 0.256 | 0.072 | 3.29E-12    | 12 | #N/A | #N/A        |
| MRPS36    | 1.41E-12    | 0.364450698 | 0.412 | 0.187 | 6.26E-08    | 5  | #N/A | #N/A        |
| IKBKG     | 2.91E-12    | 0.364199275 | 0.179 | 0.051 | 1.29E-07    | X  | #N/A | MGI:3808877 |
| COTL1     | 3.43E-13    | 0.364191353 | 0.16  | 0.039 | 1.52E-08    | 16 | #N/A | #N/A        |
| TSPYL1    | 5.59E-11    | 0.363086567 | 0.309 | 0.134 | 2.49E-06    | 6  | #N/A | #N/A        |
| TRIM16    | 3.09E-15    | 0.363021022 | 0.195 | 0.048 | 1.37E-10    | 17 | #N/A | #N/A        |
| MRPL53    | 2.83E-17    | 0.361475331 | 0.16  | 0.027 | 1.26E-12    | 2  | #N/A | #N/A        |
| SFT2D1    | 1.25E-09    | 0.361473016 | 0.271 | 0.12  | 5.58E-05    | 6  | #N/A | #N/A        |
| DECR2     | 1.88E-12    | 0.361213453 | 0.218 | 0.071 | 8.34E-08    | 16 | #N/A | #N/A        |
| APEX1     | 4.24E-17    | 0.361081913 | 0.244 | 0.066 | 1.88E-12    | 14 | #N/A | MGI:1857955 |
| ARF1      | 1.14E-13    | 0.360085753 | 0.634 | 0.335 | 5.07E-09    | 1  | #N/A | #N/A        |
| EIF6      | 3.97E-13    | 0.359080056 | 0.328 | 0.13  | 1.76E-08    | 20 | #N/A | #N/A        |
| MMP15     | 4.95E-08    | 0.358912988 | 0.168 | 0.065 | 0.002200314 | 16 | #N/A | #N/A        |
| ZNF580    | 9.06E-14    | 0.358838327 | 0.16  | 0.037 | 4.03E-09    | 19 | #N/A | #N/A        |
| CDC42EP1  | 2.71E-17    | 0.358703685 | 0.172 | 0.032 | 1.20E-12    | 22 | #N/A | #N/A        |
| FDXR      | 1.10E-11    | 0.358626772 | 0.542 | 0.291 | 4.89E-07    | 17 | #N/A | #N/A        |
| NDUFS8    | 2.07E-09    | 0.358370468 | 0.45  | 0.247 | 9.18E-05    | 11 | #N/A | #N/A        |
| C12orf57  | 2.32E-17    | 0.358241361 | 0.313 | 0.101 | 1.03E-12    | 12 | #N/A | #N/A        |
| SERTAD3   | 4.05E-12    | 0.358078879 | 0.141 | 0.033 | 1.80E-07    | 19 | #N/A | #N/A        |
| SSBP1     | 3.34E-13    | 0.357987252 | 0.584 | 0.309 | 1.48E-08    | 7  | #N/A | #N/A        |
| COX20     | 8.03E-11    | 0.357807397 | 0.37  | 0.174 | 3.57E-06    | 1  | #N/A | #N/A        |
| CHMP2A    | 4.61E-12    | 0.357190857 | 0.466 | 0.229 | 2.05E-07    | 19 | #N/A | #N/A        |
| PLCD1     | 5.72E-11    | 0.356115093 | 0.317 | 0.139 | 2.54E-06    | 3  | #N/A | #N/A        |
| DCXR      | 6.66E-09    | 0.356082766 | 0.603 | 0.396 | 0.000296094 | 17 | #N/A | #N/A        |
| SUMO1     | 5.34E-14    | 0.355807884 | 0.462 | 0.207 | 2.38E-09    | 2  | #N/A | MGI:5708184 |
| AIP       | 1.91E-12    | 0.355588437 | 0.206 | 0.064 | 8.51E-08    | 11 | #N/A | #N/A        |
| RPL24     | 1.79E-13    | 0.355033931 | 0.851 | 0.646 | 7.94E-09    | 3  | #N/A | #N/A        |
| MAGOH     | 3.61E-12    | 0.354841315 | 0.328 | 0.137 | 1.60E-07    | 1  | #N/A | #N/A        |
| KLF10     | 0.000220164 | 0.354736292 | 0.118 | 0.056 | 1           | 8  | #N/A | #N/A        |
| UQCRB     | 2.15E-09    | 0.354357531 | 0.721 | 0.507 | 9.56E-05    | 8  | #N/A | #N/A        |
| POLDIP2   | 1.01E-10    | 0.354224906 | 0.305 | 0.135 | 4.47E-06    | 17 | #N/A | #N/A        |
| NIPSNAP3A | 1.16E-10    | 0.353626234 | 0.195 | 0.066 | 5.15E-06    | 9  | #N/A | #N/A        |
| IDH1      | 5.81E-12    | 0.353184253 | 0.405 | 0.189 | 2.58E-07    | 2  | #N/A | #N/A        |

|          |          |             |       |       |             |    |      |             |
|----------|----------|-------------|-------|-------|-------------|----|------|-------------|
| POP7     | 1.67E-13 | 0.353141387 | 0.237 | 0.075 | 7.40E-09    | 7  | #N/A | #N/A        |
| C20orf24 | 1.20E-10 | 0.352788936 | 0.302 | 0.13  | 5.35E-06    | 20 | #N/A | #N/A        |
| RAN      | 7.86E-12 | 0.352271529 | 0.66  | 0.392 | 3.49E-07    | 12 | #N/A | #N/A        |
| ASMTL    | 1.54E-14 | 0.352220542 | 0.172 | 0.04  | 6.83E-10    | X  | #N/A | #N/A        |
| SDHAF2   | 9.36E-16 | 0.352218594 | 0.298 | 0.099 | 4.16E-11    | 11 | #N/A | #N/A        |
| MFGE8    | 5.10E-08 | 0.351893308 | 0.153 | 0.056 | 0.002266473 | 15 | #N/A | MGI:3578644 |
| RPS27L   | 1.82E-08 | 0.350898441 | 0.393 | 0.211 | 0.000807299 | 15 | #N/A | #N/A        |
| FAM96A   | 1.53E-13 | 0.350885505 | 0.183 | 0.048 | 6.82E-09    | 15 | #N/A | #N/A        |
| TMEM219  | 4.26E-12 | 0.350601303 | 0.531 | 0.278 | 1.89E-07    | 16 | #N/A | #N/A        |
| HMG20B   | 7.48E-13 | 0.350495949 | 0.225 | 0.073 | 3.32E-08    | 19 | #N/A | #N/A        |
| ISCU     | 1.38E-10 | 0.350035849 | 0.626 | 0.366 | 6.12E-06    | 12 | #N/A | #N/A        |
| APH1A    | 1.27E-10 | 0.349936276 | 0.214 | 0.077 | 5.65E-06    | 1  | #N/A | #N/A        |
| BOLA3    | 1.01E-12 | 0.349793324 | 0.332 | 0.136 | 4.48E-08    | 2  | #N/A | #N/A        |
| SOX2     | 1.19E-19 | 0.349771514 | 0.111 | 0.008 | 5.31E-15    | 3  | #N/A | MGI:2449045 |
| OTUB1    | 6.56E-10 | 0.348279366 | 0.237 | 0.096 | 2.92E-05    | 11 | #N/A | #N/A        |
| SLC25A4  | 1.21E-11 | 0.348208746 | 0.668 | 0.395 | 5.38E-07    | 4  | #N/A | #N/A        |
| MRPL23   | 1.97E-13 | 0.347907968 | 0.218 | 0.065 | 8.74E-09    | 11 | #N/A | #N/A        |
| SCAND1   | 8.08E-13 | 0.347359072 | 0.515 | 0.26  | 3.59E-08    | 20 | #N/A | #N/A        |
| ARL6IP4  | 2.61E-10 | 0.347231608 | 0.481 | 0.259 | 1.16E-05    | 12 | #N/A | #N/A        |
| TMEM106C | 9.45E-13 | 0.346796822 | 0.271 | 0.099 | 4.20E-08    | 12 | #N/A | #N/A        |
| BIRC2    | 5.63E-12 | 0.346621115 | 0.24  | 0.086 | 2.50E-07    | 11 | #N/A | MGI:5319370 |
| PHYHIP   | 3.16E-11 | 0.34600421  | 0.172 | 0.052 | 1.41E-06    | 8  | #N/A | #N/A        |
| IER3IP1  | 3.23E-12 | 0.346002433 | 0.221 | 0.073 | 1.44E-07    | 18 | #N/A | #N/A        |
| DSTN     | 1.04E-10 | 0.34597071  | 0.668 | 0.411 | 4.64E-06    | 20 | #N/A | #N/A        |
| MRPS28   | 1.86E-16 | 0.345718136 | 0.229 | 0.06  | 8.29E-12    | 8  | #N/A | #N/A        |
| PDHB     | 4.95E-10 | 0.345530491 | 0.321 | 0.146 | 2.20E-05    | 3  | #N/A | #N/A        |
| PPIH     | 4.47E-12 | 0.345482898 | 0.172 | 0.048 | 1.99E-07    | 1  | #N/A | #N/A        |
| TMEM123  | 2.77E-08 | 0.345442591 | 0.324 | 0.165 | 0.001232317 | 11 | #N/A | #N/A        |
| C16orf91 | 5.58E-11 | 0.345267651 | 0.206 | 0.072 | 2.48E-06    | 16 | #N/A | #N/A        |
| FDFT1    | 5.52E-15 | 0.344862911 | 0.435 | 0.185 | 2.45E-10    | 8  | #N/A | MGI:3579504 |
| PTN      | 5.80E-07 | 0.343811677 | 0.385 | 0.223 | 0.025801364 | 7  | #N/A | MGI:3053747 |
| LSM3     | 1.49E-09 | 0.343472597 | 0.58  | 0.349 | 6.63E-05    | 3  | #N/A | #N/A        |
| TUBA1C   | 7.57E-10 | 0.34331472  | 0.267 | 0.114 | 3.36E-05    | 12 | #N/A | #N/A        |
| ATP6AP1  | 1.86E-06 | 0.343307598 | 0.198 | 0.095 | 0.082483045 | X  | YES  | #N/A        |
| MRPL38   | 1.16E-22 | 0.343111647 | 0.145 | 0.013 | 5.17E-18    | 17 | #N/A | #N/A        |
| PDLIM4   | 4.03E-17 | 0.342375338 | 0.103 | 0.008 | 1.79E-12    | 5  | #N/A | #N/A        |
| CDK16    | 6.25E-09 | 0.341665376 | 0.279 | 0.128 | 0.000277793 | X  | YES  | MGI:5319210 |
| MOCS2    | 1.78E-10 | 0.340787875 | 0.206 | 0.073 | 7.90E-06    | 5  | #N/A | #N/A        |
| NDUFA13  | 8.15E-10 | 0.340715244 | 0.786 | 0.567 | 3.62E-05    | 19 | #N/A | #N/A        |
| GOT2     | 7.11E-09 | 0.340525043 | 0.237 | 0.102 | 0.000316127 | 16 | #N/A | #N/A        |
| ANP32B   | 3.37E-12 | 0.340407347 | 0.279 | 0.106 | 1.50E-07    | 9  | #N/A | #N/A        |
| NTPCR    | 1.20E-11 | 0.339674019 | 0.229 | 0.08  | 5.32E-07    | 1  | #N/A | #N/A        |
| DYNC1I2  | 5.04E-11 | 0.339626845 | 0.366 | 0.169 | 2.24E-06    | 2  | #N/A | #N/A        |
| EIF3K    | 1.40E-10 | 0.339461425 | 0.435 | 0.218 | 6.22E-06    | 19 | #N/A | #N/A        |
| NPTX2    | 9.62E-15 | 0.338775458 | 0.13  | 0.022 | 4.27E-10    | 7  | #N/A | #N/A        |
| RALY     | 1.73E-12 | 0.338585903 | 0.309 | 0.123 | 7.69E-08    | 20 | #N/A | #N/A        |
| S100A6   | 1.08E-11 | 0.33807545  | 0.137 | 0.031 | 4.80E-07    | 1  | #N/A | MGI:5692619 |
| NFE2L2   | 3.01E-11 | 0.337619322 | 0.45  | 0.226 | 1.34E-06    | 2  | #N/A | #N/A        |
| PRCC     | 2.39E-12 | 0.336995129 | 0.176 | 0.049 | 1.06E-07    | 1  | #N/A | #N/A        |
| C11orf58 | 4.36E-13 | 0.336665947 | 0.561 | 0.286 | 1.94E-08    | 11 | #N/A | #N/A        |
| RAB1A    | 4.45E-11 | 0.33653056  | 0.401 | 0.19  | 1.98E-06    | 2  | #N/A | #N/A        |
| DCTN2    | 1.88E-12 | 0.335982754 | 0.24  | 0.081 | 8.38E-08    | 12 | #N/A | #N/A        |
| SNX4     | 9.03E-10 | 0.335766512 | 0.202 | 0.074 | 4.01E-05    | 3  | #N/A | #N/A        |
| PGRMC1   | 1.42E-09 | 0.335683074 | 0.179 | 0.063 | 6.29E-05    | X  | YES  | MGI:5775088 |
| GMPR     | 3.78E-10 | 0.335635278 | 0.588 | 0.34  | 1.68E-05    | 6  | #N/A | #N/A        |
| GSTO1    | 4.06E-15 | 0.335621438 | 0.221 | 0.06  | 1.81E-10    | 10 | #N/A | #N/A        |
| ADI1     | 4.17E-11 | 0.335074704 | 0.405 | 0.193 | 1.85E-06    | 2  | #N/A | #N/A        |
| CD59     | 8.17E-09 | 0.334486779 | 0.321 | 0.159 | 0.000363001 | 11 | #N/A | MGI:2653298 |
| DNAJC19  | 1.77E-11 | 0.334328879 | 0.324 | 0.139 | 7.86E-07    | 3  | #N/A | #N/A        |
| LSM5     | 1.66E-10 | 0.334043925 | 0.363 | 0.17  | 7.37E-06    | 7  | #N/A | #N/A        |
| IFT52    | 1.63E-09 | 0.333885484 | 0.233 | 0.092 | 7.26E-05    | 20 | #N/A | #N/A        |
| PGK1     | 3.08E-13 | 0.333760545 | 0.294 | 0.109 | 1.37E-08    | X  | YES  | #N/A        |
| DECR1    | 4.79E-11 | 0.333229733 | 0.527 | 0.283 | 2.13E-06    | 8  | #N/A | #N/A        |
| PCNP     | 1.00E-11 | 0.333204974 | 0.26  | 0.1   | 4.46E-07    | 3  | #N/A | #N/A        |
| IFI6     | 1.12E-10 | 0.33307732  | 0.24  | 0.093 | 4.99E-06    | 1  | #N/A | #N/A        |
| NDUFA5   | 3.36E-10 | 0.332523531 | 0.561 | 0.326 | 1.50E-05    | 7  | #N/A | #N/A        |
| RPS6     | 3.45E-14 | 0.332204254 | 0.958 | 0.826 | 1.53E-09    | 9  | #N/A | #N/A        |
| CUTA     | 6.20E-13 | 0.331805437 | 0.408 | 0.182 | 2.76E-08    | 6  | #N/A | #N/A        |
| TAF7     | 2.62E-10 | 0.331619507 | 0.542 | 0.296 | 1.16E-05    | 5  | #N/A | #N/A        |
| OCIAD2   | 1.66E-10 | 0.331615987 | 0.29  | 0.123 | 7.37E-06    | 4  | #N/A | #N/A        |
| TCF25    | 4.82E-09 | 0.33135927  | 0.439 | 0.238 | 0.000214144 | 16 | #N/A | #N/A        |
| TSTA3    | 8.51E-11 | 0.330541022 | 0.313 | 0.137 | 3.78E-06    | 8  | #N/A | #N/A        |
| KCNH2    | 1.31E-09 | 0.330414212 | 0.29  | 0.131 | 5.81E-05    | 7  | #N/A | #N/A        |
| ABHD4    | 2.47E-09 | 0.330150448 | 0.29  | 0.132 | 0.000109797 | 14 | #N/A | #N/A        |
| RNF181   | 4.54E-12 | 0.329815254 | 0.37  | 0.162 | 2.02E-07    | 2  | #N/A | #N/A        |

|          |          |             |       |       |             |    |      |             |
|----------|----------|-------------|-------|-------|-------------|----|------|-------------|
| MRPL12   | 2.42E-11 | 0.329435609 | 0.24  | 0.088 | 1.07E-06    | 17 | #N/A | #N/A        |
| NDUFV2   | 1.32E-11 | 0.32907948  | 0.622 | 0.355 | 5.87E-07    | 18 | #N/A | #N/A        |
| CLTA     | 2.70E-10 | 0.328962337 | 0.45  | 0.23  | 1.20E-05    | 9  | #N/A | #N/A        |
| PPP2CA   | 5.06E-13 | 0.328507808 | 0.321 | 0.128 | 2.25E-08    | 5  | #N/A | azoospermia |
| SRSF2    | 4.40E-13 | 0.327640869 | 0.447 | 0.201 | 1.96E-08    | 17 | #N/A | #N/A        |
| PEBP1    | 4.34E-12 | 0.32731824  | 0.885 | 0.661 | 1.93E-07    | 12 | #N/A | #N/A        |
| POLR2J   | 1.15E-10 | 0.326847461 | 0.389 | 0.189 | 5.13E-06    | 7  | #N/A | #N/A        |
| CLNS1A   | 1.23E-08 | 0.326744213 | 0.275 | 0.128 | 0.000547612 | 11 | #N/A | #N/A        |
| PRMT1    | 1.56E-10 | 0.326352951 | 0.603 | 0.354 | 6.93E-06    | 19 | #N/A | MGI:2448365 |
| HPCAL1   | 1.88E-09 | 0.325850716 | 0.431 | 0.229 | 8.35E-05    | 2  | #N/A | #N/A        |
| DDB1     | 1.95E-08 | 0.324462144 | 0.279 | 0.134 | 0.000868848 | 11 | #N/A | #N/A        |
| MGAT2    | 3.40E-05 | 0.324200295 | 0.141 | 0.065 | 1           | 14 | #N/A | MA          |
| SMDT1    | 4.23E-12 | 0.324184812 | 0.385 | 0.171 | 1.88E-07    | 22 | #N/A | #N/A        |
| C17orf58 | 4.44E-11 | 0.323884494 | 0.137 | 0.034 | 1.98E-06    | 17 | #N/A | #N/A        |
| VPS25    | 5.14E-11 | 0.322768027 | 0.21  | 0.072 | 2.29E-06    | 17 | #N/A | #N/A        |
| FAM50A   | 5.26E-09 | 0.322485953 | 0.176 | 0.062 | 0.000233701 | X  | YES  | #N/A        |
| ACOT8    | 4.41E-15 | 0.322198317 | 0.179 | 0.041 | 1.96E-10    | 20 | #N/A | #N/A        |
| PHB2     | 3.60E-10 | 0.321353113 | 0.275 | 0.118 | 1.60E-05    | 12 | #N/A | MGI:3574361 |
| SHISA5   | 6.46E-11 | 0.319218773 | 0.21  | 0.073 | 2.87E-06    | 3  | #N/A | #N/A        |
| MINOS1   | 5.21E-11 | 0.31900747  | 0.492 | 0.255 | 2.32E-06    | 1  | #N/A | #N/A        |
| FEZ2     | 3.26E-11 | 0.318994276 | 0.416 | 0.199 | 1.45E-06    | 2  | #N/A | #N/A        |
| LAMTOR1  | 8.24E-12 | 0.318698805 | 0.397 | 0.184 | 3.66E-07    | 11 | #N/A | #N/A        |
| DDX41    | 4.27E-08 | 0.318341188 | 0.156 | 0.056 | 0.001897774 | 5  | #N/A | #N/A        |
| PEPD     | 4.95E-12 | 0.318320481 | 0.206 | 0.065 | 2.20E-07    | 19 | #N/A | MGI:2683249 |
| MRPL22   | 4.52E-10 | 0.318182075 | 0.42  | 0.214 | 2.01E-05    | 5  | #N/A | #N/A        |
| GGCT     | 1.10E-11 | 0.317960481 | 0.24  | 0.086 | 4.88E-07    | 7  | #N/A | #N/A        |
| HMG3     | 1.21E-09 | 0.317855908 | 0.817 | 0.605 | 5.39E-05    | 6  | #N/A | #N/A        |
| TM2D3    | 6.18E-07 | 0.317743271 | 0.149 | 0.058 | 0.027481231 | 15 | #N/A | #N/A        |
| TKT      | 2.97E-11 | 0.317719992 | 0.34  | 0.153 | 1.32E-06    | 3  | #N/A | MGI:2671068 |
| HSD17B10 | 1.56E-11 | 0.317549332 | 0.282 | 0.111 | 6.94E-07    | X  | YES  | #N/A        |
| ATP6V0B  | 2.90E-10 | 0.316818511 | 0.328 | 0.149 | 1.29E-05    | 1  | #N/A | #N/A        |
| APRT     | 7.90E-10 | 0.316616911 | 0.393 | 0.199 | 3.51E-05    | 16 | #N/A | MGI:2429961 |
| FRMD8    | 5.65E-08 | 0.316455864 | 0.134 | 0.044 | 0.002509911 | 11 | #N/A | #N/A        |
| RHEB     | 4.62E-11 | 0.3156519   | 0.324 | 0.139 | 2.05E-06    | 7  | #N/A | #N/A        |
| GNG7     | 2.10E-12 | 0.315538152 | 0.26  | 0.094 | 9.34E-08    | 19 | #N/A | #N/A        |
| ATP5J    | 8.21E-10 | 0.315535763 | 0.771 | 0.534 | 3.65E-05    | 21 | #N/A | #N/A        |
| PARVB    | 1.92E-08 | 0.315419378 | 0.118 | 0.034 | 0.00085352  | 22 | #N/A | #N/A        |
| RAB11A   | 3.16E-11 | 0.315409559 | 0.565 | 0.312 | 1.40E-06    | 15 | #N/A | #N/A        |
| NDUFC2   | 2.73E-10 | 0.314987274 | 0.557 | 0.31  | 1.21E-05    | 11 | #N/A | #N/A        |
| SUB1     | 5.19E-08 | 0.314790051 | 0.653 | 0.439 | 0.002307144 | 5  | #N/A | MGI:6108891 |
| RAF1     | 4.76E-09 | 0.313944127 | 0.149 | 0.048 | 0.000211587 | 3  | #N/A | #N/A        |
| TRUB2    | 1.26E-08 | 0.31385615  | 0.156 | 0.054 | 0.00055862  | 9  | #N/A | #N/A        |
| POLR2E   | 5.75E-13 | 0.313704109 | 0.282 | 0.104 | 2.55E-08    | 19 | #N/A | #N/A        |
| EIF4EBP1 | 2.08E-13 | 0.313479801 | 0.202 | 0.057 | 9.23E-09    | 8  | #N/A | MGI:2177923 |
| VKORC1   | 6.95E-10 | 0.313133073 | 0.324 | 0.15  | 3.09E-05    | 16 | #N/A | #N/A        |
| STXBP2   | 3.27E-09 | 0.312793326 | 0.225 | 0.092 | 0.000145523 | 19 | #N/A | #N/A        |
| EMC4     | 2.66E-13 | 0.312535061 | 0.309 | 0.119 | 1.18E-08    | 15 | #N/A | #N/A        |
| C1D      | 9.73E-10 | 0.312119471 | 0.294 | 0.13  | 4.32E-05    | 2  | #N/A | #N/A        |
| LSM1     | 6.64E-13 | 0.311531565 | 0.282 | 0.104 | 2.95E-08    | 8  | #N/A | #N/A        |
| GOS2     | 4.23E-08 | 0.311463098 | 0.328 | 0.169 | 0.001881227 | 1  | #N/A | #N/A        |
| DCTN3    | 2.32E-11 | 0.311413797 | 0.305 | 0.126 | 1.03E-06    | 9  | #N/A | #N/A        |
| ARL3     | 8.65E-12 | 0.311370131 | 0.393 | 0.183 | 3.85E-07    | 10 | #N/A | #N/A        |
| HSBP1    | 4.37E-09 | 0.311195922 | 0.656 | 0.418 | 0.000194093 | 16 | #N/A | #N/A        |
| MNDA     | 4.65E-08 | 0.310837982 | 0.214 | 0.09  | 0.002066997 | 1  | #N/A | #N/A        |
| RPL15    | 3.66E-15 | 0.310799963 | 0.973 | 0.879 | 1.63E-10    | 3  | #N/A | #N/A        |
| ERP29    | 7.11E-10 | 0.310401005 | 0.416 | 0.212 | 3.16E-05    | 12 | #N/A | MGI:6342880 |
| TMEM230  | 8.89E-13 | 0.309912246 | 0.408 | 0.181 | 3.95E-08    | 20 | #N/A | #N/A        |
| AP1S1    | 1.43E-12 | 0.309643058 | 0.271 | 0.099 | 6.34E-08    | 7  | #N/A | #N/A        |
| GLOD4    | 1.99E-08 | 0.309332972 | 0.218 | 0.09  | 0.000884428 | 17 | #N/A | #N/A        |
| MMP23B   | 2.22E-12 | 0.309275969 | 0.111 | 0.019 | 9.85E-08    | 1  | #N/A | #N/A        |
| CENPV    | 3.43E-07 | 0.309116878 | 0.366 | 0.203 | 0.015232125 | 17 | #N/A | #N/A        |
| SSR2     | 1.16E-08 | 0.30882991  | 0.271 | 0.123 | 0.000516572 | 1  | #N/A | #N/A        |
| DNAJB5   | 3.11E-14 | 0.308619465 | 0.164 | 0.037 | 1.38E-09    | 9  | #N/A | #N/A        |
| BTF3L4   | 1.31E-08 | 0.308494275 | 0.286 | 0.134 | 0.000583777 | 1  | #N/A | #N/A        |
| FAIM     | 1.34E-08 | 0.308245449 | 0.149 | 0.049 | 0.000594695 | 3  | #N/A | #N/A        |
| TFG      | 2.40E-10 | 0.307665824 | 0.336 | 0.153 | 1.07E-05    | 3  | #N/A | #N/A        |
| ADK      | 3.15E-09 | 0.307526705 | 0.256 | 0.111 | 0.000140201 | 10 | #N/A | #N/A        |
| EIF4G2   | 1.39E-09 | 0.307214618 | 0.622 | 0.365 | 6.17E-05    | 11 | #N/A | #N/A        |
| IL15RA   | 1.80E-13 | 0.307111121 | 0.137 | 0.027 | 8.00E-09    | 10 | #N/A | #N/A        |
| MRPL27   | 1.41E-11 | 0.305917218 | 0.324 | 0.137 | 6.27E-07    | 17 | #N/A | #N/A        |
| DAD1     | 2.46E-08 | 0.305840081 | 0.523 | 0.313 | 0.001092583 | 14 | #N/A | #N/A        |
| MGST3    | 1.23E-10 | 0.30583448  | 0.874 | 0.64  | 5.48E-06    | 1  | #N/A | #N/A        |
| STX4     | 2.16E-07 | 0.305630187 | 0.156 | 0.06  | 0.009604648 | 16 | #N/A | #N/A        |
| BABAM1   | 2.84E-08 | 0.305292054 | 0.172 | 0.064 | 0.00126112  | 19 | #N/A | #N/A        |
| DPYSL2   | 1.10E-12 | 0.305016768 | 0.107 | 0.017 | 4.88E-08    | 8  | #N/A | #N/A        |

|            |            |             |       |       |             |    |      |             |
|------------|------------|-------------|-------|-------|-------------|----|------|-------------|
| ATP6V1G1   | 4.20E-09   | 0.304933658 | 0.725 | 0.485 | 0.000186855 | 9  | #N/A | #N/A        |
| COX7A2L    | 1.70E-16   | 0.304826869 | 0.462 | 0.188 | 7.54E-12    | 2  | #N/A | #N/A        |
| ARMC10     | 1.01E-08   | 0.304679266 | 0.248 | 0.109 | 0.000447035 | 7  | #N/A | #N/A        |
| HADH       | 3.83E-12   | 0.304088276 | 0.332 | 0.139 | 1.70E-07    | 4  | #N/A | #N/A        |
| NDUFB4     | 4.77E-08   | 0.30341823  | 0.664 | 0.444 | 0.002121341 | 3  | #N/A | #N/A        |
| MRPL32     | 5.22E-09   | 0.303361823 | 0.305 | 0.145 | 0.000232116 | 7  | #N/A | #N/A        |
| DRAM2      | 5.18E-10   | 0.303030599 | 0.137 | 0.038 | 2.30E-05    | 1  | #N/A | #N/A        |
| CCNI       | 5.79E-11   | 0.302711888 | 0.5   | 0.258 | 2.58E-06    | 4  | #N/A | #N/A        |
| ATP5L      | 1.92E-08   | 0.302433333 | 0.698 | 0.49  | 0.000855202 | 11 | #N/A | #N/A        |
| NAA10      | 2.05E-10   | 0.302415472 | 0.195 | 0.067 | 9.11E-06    | X  | YES  | #N/A        |
| RAB5C      | 6.73E-11   | 0.302160682 | 0.321 | 0.139 | 2.99E-06    | 17 | #N/A | #N/A        |
| POLR3GL    | 5.56E-09   | 0.302103174 | 0.233 | 0.096 | 0.000247274 | 1  | #N/A | #N/A        |
| SLBP       | 1.39E-08   | 0.301252148 | 0.313 | 0.151 | 0.000616197 | 4  | #N/A | #N/A        |
| MRPS35     | 7.96E-11   | 0.300892357 | 0.26  | 0.102 | 3.54E-06    | 12 | #N/A | #N/A        |
| LSM8       | 3.88E-10   | 0.300861963 | 0.305 | 0.136 | 1.72E-05    | 7  | #N/A | #N/A        |
| CDKN2AIPNL | 1.69E-10   | 0.300583307 | 0.305 | 0.131 | 7.50E-06    | 5  | #N/A | #N/A        |
| ARPC3      | 6.08E-10   | 0.300394435 | 0.641 | 0.382 | 2.70E-05    | 12 | #N/A | #N/A        |
| FARSA      | 1.36E-11   | 0.299918144 | 0.145 | 0.036 | 6.03E-07    | 19 | #N/A | #N/A        |
| CYP27A1    | 2.60E-05   | 0.29986069  | 0.111 | 0.044 | 1           | 2  | #N/A | #N/A        |
| SLC12A5    | 1.24E-13   | 0.299767717 | 0.13  | 0.024 | 5.52E-09    | 20 | #N/A | #N/A        |
| BDH2       | 1.27E-09   | 0.299005336 | 0.214 | 0.081 | 5.64E-05    | 4  | #N/A | #N/A        |
| SEC13      | 9.53E-08   | 0.298940997 | 0.198 | 0.084 | 0.004237323 | 3  | #N/A | #N/A        |
| SNRNP27    | 4.55E-11   | 0.298551355 | 0.214 | 0.074 | 2.02E-06    | 2  | #N/A | #N/A        |
| ISOC2      | 6.41E-12   | 0.298436581 | 0.302 | 0.121 | 2.85E-07    | 19 | #N/A | #N/A        |
| GADD45B    | 1.33E-08   | 0.297730202 | 0.229 | 0.095 | 0.000589741 | 19 | #N/A | #N/A        |
| PIN4       | 9.24E-11   | 0.297720861 | 0.214 | 0.075 | 4.11E-06    | X  | YES  | #N/A        |
| PLD3       | 2.61E-07   | 0.296676615 | 0.164 | 0.066 | 0.011599821 | 19 | #N/A | #N/A        |
| SERPINE2   | 0.00020487 | 0.296461996 | 0.179 | 0.099 | 1           | 2  | #N/A | MGI:2387774 |
| FAM213A    | 1.19E-08   | 0.29639881  | 0.462 | 0.26  | 0.000528345 | 10 | #N/A | #N/A        |
| TXNDC12    | 1.71E-08   | 0.295598794 | 0.16  | 0.056 | 0.00075905  | 1  | #N/A | #N/A        |
| HSPB8      | 9.57E-08   | 0.295128763 | 0.118 | 0.037 | 0.004252361 | 12 | #N/A | #N/A        |
| ANP32A     | 1.21E-08   | 0.294867671 | 0.218 | 0.09  | 0.000538691 | 15 | #N/A | #N/A        |
| CHMP4B     | 5.58E-13   | 0.294703642 | 0.324 | 0.127 | 2.48E-08    | 20 | #N/A | #N/A        |
| TMEM50A    | 1.62E-07   | 0.294100874 | 0.214 | 0.096 | 0.007216862 | 1  | #N/A | #N/A        |
| NBPF14     | 6.72E-08   | 0.294056403 | 0.111 | 0.032 | 0.002988325 | 1  | #N/A | #N/A        |
| AKT1S1     | 1.05E-13   | 0.294038122 | 0.153 | 0.033 | 4.65E-09    | 19 | #N/A | #N/A        |
| C8orf59    | 2.11E-07   | 0.293956695 | 0.305 | 0.159 | 0.00937774  | 8  | #N/A | #N/A        |
| ERH        | 5.67E-08   | 0.293939683 | 0.523 | 0.314 | 0.002519219 | 14 | #N/A | #N/A        |
| NAP1L3     | 7.44E-10   | 0.293890895 | 0.229 | 0.09  | 3.31E-05    | X  | #N/A | #N/A        |
| DAXX       | 8.44E-08   | 0.293158293 | 0.156 | 0.058 | 0.00375217  | 6  | #N/A | #N/A        |
| OAT        | 1.35E-07   | 0.292625638 | 0.336 | 0.176 | 0.006011599 | 10 | #N/A | #N/A        |
| SEC11A     | 2.60E-11   | 0.292503772 | 0.424 | 0.204 | 1.16E-06    | 15 | #N/A | #N/A        |
| C6orf226   | 1.39E-14   | 0.292102347 | 0.206 | 0.055 | 6.19E-10    | 6  | #N/A | #N/A        |
| FXN        | 1.17E-12   | 0.291972293 | 0.21  | 0.064 | 5.19E-08    | 9  | #N/A | #N/A        |
| RNF5       | 5.25E-12   | 0.291227047 | 0.279 | 0.105 | 2.34E-07    | 6  | #N/A | #N/A        |
| ACTR10     | 4.57E-10   | 0.29097463  | 0.267 | 0.112 | 2.03E-05    | 14 | #N/A | #N/A        |
| TMEM134    | 4.92E-11   | 0.290864387 | 0.317 | 0.136 | 2.19E-06    | 11 | #N/A | #N/A        |
| VCP        | 6.12E-09   | 0.290697674 | 0.309 | 0.149 | 0.000271943 | 9  | #N/A | #N/A        |
| C17orf49   | 8.00E-14   | 0.290356797 | 0.118 | 0.019 | 3.56E-09    | 17 | #N/A | #N/A        |
| MRO        | 1.71E-08   | 0.290257163 | 0.42  | 0.229 | 0.000760757 | 18 | #N/A | #N/A        |
| AKIP1      | 1.32E-09   | 0.290253948 | 0.16  | 0.051 | 5.86E-05    | 11 | #N/A | #N/A        |
| PRDX2      | 2.62E-08   | 0.29015278  | 0.309 | 0.152 | 0.0011658   | 19 | #N/A | #N/A        |
| NGRN       | 3.54E-13   | 0.290109342 | 0.153 | 0.035 | 1.58E-08    | 15 | #N/A | #N/A        |
| ATG12      | 4.29E-09   | 0.289942793 | 0.206 | 0.08  | 0.000190776 | 5  | #N/A | #N/A        |
| PGM2       | 2.81E-09   | 0.289604222 | 0.164 | 0.055 | 0.000124957 | 4  | #N/A | #N/A        |
| TMEM14A    | 4.43E-08   | 0.289390324 | 0.191 | 0.076 | 0.001968834 | 6  | #N/A | #N/A        |
| DCTPP1     | 2.72E-09   | 0.289332204 | 0.183 | 0.065 | 0.000121011 | 16 | #N/A | #N/A        |
| RBBP4      | 2.48E-09   | 0.289091078 | 0.359 | 0.175 | 0.000110411 | 1  | #N/A | #N/A        |
| LRRC47     | 1.17E-11   | 0.288836928 | 0.137 | 0.032 | 5.20E-07    | 1  | #N/A | #N/A        |
| CDH2       | 4.49E-05   | 0.288165915 | 0.191 | 0.102 | 1           | 18 | #N/A | #N/A        |
| ANAPC5     | 1.85E-07   | 0.288056803 | 0.191 | 0.081 | 0.008223566 | 12 | #N/A | #N/A        |
| RNF2       | 1.19E-12   | 0.287874565 | 0.176 | 0.047 | 5.27E-08    | 1  | #N/A | #N/A        |
| CHMP4A     | 2.92E-09   | 0.287600744 | 0.225 | 0.09  | 0.000129756 | 14 | #N/A | #N/A        |
| ABCD1      | 4.50E-05   | 0.287123404 | 0.122 | 0.053 | 1           | X  | YES  | MGI:1861771 |
| UBE2I      | 6.35E-11   | 0.286923559 | 0.477 | 0.246 | 2.82E-06    | 16 | #N/A | #N/A        |
| GSR        | 7.80E-08   | 0.286843304 | 0.153 | 0.056 | 0.003468515 | 8  | #N/A | #N/A        |
| CTTN       | 1.74E-08   | 0.285657681 | 0.256 | 0.116 | 0.000774249 | 11 | #N/A | MGI:4330257 |
| WDR18      | 3.27E-10   | 0.285635625 | 0.183 | 0.06  | 1.46E-05    | 19 | #N/A | #N/A        |
| HSPA9      | 1.33E-11   | 0.285520546 | 0.447 | 0.215 | 5.93E-07    | 5  | #N/A | #N/A        |
| C8orf33    | 2.50E-07   | 0.285373276 | 0.172 | 0.07  | 0.01110215  | 8  | #N/A | #N/A        |
| USP11      | 2.50E-08   | 0.284872959 | 0.191 | 0.076 | 0.001112296 | X  | YES  | MGI:6363163 |
| LMCD1      | 7.06E-11   | 0.284643749 | 0.176 | 0.054 | 3.14E-06    | 3  | #N/A | #N/A        |
| SNX5       | 7.72E-08   | 0.284080524 | 0.168 | 0.064 | 0.003431101 | 20 | #N/A | #N/A        |
| NANS       | 7.56E-10   | 0.283924508 | 0.347 | 0.163 | 3.36E-05    | 9  | #N/A | #N/A        |
| EIF2AK1    | 1.63E-06   | 0.283843728 | 0.195 | 0.089 | 0.072312544 | 7  | #N/A | #N/A        |

|           |             |             |       |       |             |    |      |             |
|-----------|-------------|-------------|-------|-------|-------------|----|------|-------------|
| IL1A      | 4.27E-10    | 0.283761183 | 0.149 | 0.043 | 1.90E-05    | 2  | #N/A | #N/A        |
| UBE2E2    | 1.26E-11    | 0.283300805 | 0.218 | 0.073 | 5.62E-07    | 3  | #N/A | #N/A        |
| NECAP2    | 5.17E-11    | 0.282886228 | 0.256 | 0.1   | 2.30E-06    | 1  | #N/A | #N/A        |
| AXL       | 2.84E-05    | 0.282700857 | 0.13  | 0.056 | 1           | 19 | #N/A | MA          |
| ADH5      | 1.02E-09    | 0.282512474 | 0.508 | 0.272 | 4.52E-05    | 4  | #N/A | #N/A        |
| MED10     | 3.00E-11    | 0.282503677 | 0.351 | 0.156 | 1.33E-06    | 5  | #N/A | #N/A        |
| COPS8     | 2.42E-12    | 0.282061673 | 0.279 | 0.104 | 1.08E-07    | 2  | #N/A | #N/A        |
| GUK1      | 2.65E-07    | 0.281634979 | 0.718 | 0.517 | 0.011771148 | 1  | #N/A | #N/A        |
| EMG1      | 1.71E-09    | 0.281106677 | 0.183 | 0.064 | 7.61E-05    | 12 | #N/A | #N/A        |
| C14orf159 | 1.35E-07    | 0.281029599 | 0.153 | 0.056 | 0.005979249 | 14 | #N/A | #N/A        |
| SLC30A3   | 1.77E-09    | 0.280894659 | 0.195 | 0.072 | 7.87E-05    | 2  | #N/A | #N/A        |
| NPM1      | 1.93E-08    | 0.280862868 | 0.805 | 0.557 | 0.00085866  | 5  | #N/A | #N/A        |
| ZNF593    | 1.99E-08    | 0.280578253 | 0.191 | 0.074 | 0.000884817 | 1  | #N/A | #N/A        |
| SEC22B    | 2.91E-09    | 0.280382363 | 0.221 | 0.089 | 0.00012957  | 1  | #N/A | #N/A        |
| SNX7      | 4.75E-10    | 0.280309204 | 0.275 | 0.117 | 2.11E-05    | 1  | #N/A | #N/A        |
| CCS       | 4.23E-09    | 0.280140246 | 0.347 | 0.169 | 0.000187816 | 11 | #N/A | MGI:2446505 |
| MRPS34    | 3.44E-08    | 0.280114765 | 0.275 | 0.129 | 0.001529239 | 16 | #N/A | #N/A        |
| PSMB2     | 4.08E-10    | 0.280088748 | 0.286 | 0.122 | 1.81E-05    | 1  | #N/A | #N/A        |
| RPL36AL   | 7.82E-08    | 0.279635351 | 0.691 | 0.441 | 0.003474922 | 14 | #N/A | #N/A        |
| FAH       | 9.26E-07    | 0.27936821  | 0.229 | 0.11  | 0.041175044 | 15 | #N/A | #N/A        |
| COA6      | 7.80E-08    | 0.279286646 | 0.172 | 0.066 | 0.00346843  | 1  | #N/A | MGI:6341938 |
| NUBP1     | 5.93E-10    | 0.279180117 | 0.141 | 0.04  | 2.64E-05    | 16 | #N/A | #N/A        |
| LCMT1     | 1.05E-10    | 0.278964485 | 0.286 | 0.117 | 4.67E-06    | 16 | #N/A | #N/A        |
| MRPS12    | 2.61E-09    | 0.278934913 | 0.29  | 0.13  | 0.000116052 | 19 | #N/A | #N/A        |
| VAPA      | 1.42E-10    | 0.278892379 | 0.481 | 0.249 | 6.31E-06    | 18 | #N/A | #N/A        |
| POMT2     | 3.08E-07    | 0.278795741 | 0.153 | 0.059 | 0.013673358 | 14 | #N/A | #N/A        |
| TPMT      | 1.80E-10    | 0.278515143 | 0.244 | 0.095 | 8.02E-06    | 6  | #N/A | #N/A        |
| CISD2     | 1.33E-08    | 0.278233787 | 0.202 | 0.081 | 0.000593103 | 4  | #N/A | #N/A        |
| ARFRP1    | 1.72E-09    | 0.278101428 | 0.164 | 0.053 | 7.64E-05    | 20 | #N/A | #N/A        |
| TCEAL1    | 1.72E-07    | 0.277945058 | 0.156 | 0.059 | 0.007636501 | X  | YES  | #N/A        |
| HNRNPH2   | 5.06E-07    | 0.277917483 | 0.176 | 0.074 | 0.022487669 | X  | YES  | #N/A        |
| PHF5A     | 2.40E-07    | 0.276649309 | 0.115 | 0.036 | 0.010654378 | 22 | #N/A | #N/A        |
| NDUFB6    | 7.02E-08    | 0.276636721 | 0.569 | 0.357 | 0.003119842 | 9  | #N/A | #N/A        |
| CCDC124   | 9.89E-10    | 0.276585569 | 0.248 | 0.101 | 4.40E-05    | 19 | #N/A | #N/A        |
| TMEM11    | 8.18E-11    | 0.276293064 | 0.24  | 0.091 | 3.64E-06    | 17 | #N/A | #N/A        |
| VASP      | 4.69E-06    | 0.276216075 | 0.149 | 0.064 | 0.208509681 | 19 | #N/A | #N/A        |
| NDUFB3    | 2.88E-09    | 0.275922062 | 0.439 | 0.23  | 0.000128041 | 2  | #N/A | #N/A        |
| FABP6     | 2.78E-07    | 0.275319307 | 0.141 | 0.051 | 0.012360002 | 5  | #N/A | #N/A        |
| MED25     | 1.74E-05    | 0.275289349 | 0.168 | 0.08  | 0.77487217  | 19 | #N/A | #N/A        |
| CCDC106   | 1.14E-13    | 0.275062893 | 0.229 | 0.07  | 5.05E-09    | 19 | #N/A | #N/A        |
| CCT8      | 1.02E-09    | 0.274728441 | 0.385 | 0.194 | 4.54E-05    | 21 | #N/A | #N/A        |
| SMS       | 5.64E-11    | 0.274719666 | 0.103 | 0.019 | 2.51E-06    | X  | YES  | MGI:4431547 |
| C1orf53   | 4.21E-09    | 0.274435387 | 0.137 | 0.04  | 0.000187223 | 1  | #N/A | #N/A        |
| TMED10    | 2.08E-06    | 0.274323344 | 0.328 | 0.184 | 0.092434559 | 14 | #N/A | MGI:5695918 |
| C10orf10  | 8.84E-06    | 0.273905306 | 0.156 | 0.07  | 0.392835121 | 10 | #N/A | #N/A        |
| CSDC2     | 1.42E-07    | 0.272763413 | 0.202 | 0.088 | 0.006317433 | 22 | #N/A | #N/A        |
| ANXA11    | 4.52E-11    | 0.272479595 | 0.195 | 0.063 | 2.01E-06    | 10 | #N/A | #N/A        |
| DPY30     | 3.33E-08    | 0.272124531 | 0.275 | 0.127 | 0.001482201 | 2  | #N/A | #N/A        |
| PDCL3     | 3.56E-08    | 0.271916888 | 0.26  | 0.12  | 0.001581262 | 2  | #N/A | #N/A        |
| NUDT16L1  | 1.02E-06    | 0.271541425 | 0.187 | 0.082 | 0.045401564 | 16 | #N/A | #N/A        |
| ARMCX6    | 1.36E-06    | 0.270849842 | 0.179 | 0.079 | 0.060424214 | X  | YES  | #N/A        |
| TATDN1    | 2.98E-07    | 0.270502588 | 0.141 | 0.051 | 0.013226568 | 8  | #N/A | #N/A        |
| ZMAT2     | 7.83E-09    | 0.270483995 | 0.229 | 0.096 | 0.000348205 | 5  | #N/A | #N/A        |
| ZFAND5    | 3.56E-06    | 0.270446876 | 0.466 | 0.292 | 0.158242029 | 9  | #N/A | #N/A        |
| TRAPPC5   | 4.07E-11    | 0.270304936 | 0.111 | 0.022 | 1.81E-06    | 19 | #N/A | #N/A        |
| TPM3      | 4.18E-09    | 0.270295346 | 0.508 | 0.286 | 0.000185595 | 1  | #N/A | #N/A        |
| LAMTOR2   | 9.62E-10    | 0.270199688 | 0.344 | 0.163 | 4.28E-05    | 1  | #N/A | #N/A        |
| EXOSC7    | 3.56E-08    | 0.2701793   | 0.275 | 0.13  | 0.001581027 | 3  | #N/A | #N/A        |
| B4GALT1   | 1.98E-08    | 0.270062114 | 0.229 | 0.098 | 0.000878005 | 9  | #N/A | MGI:2178779 |
| APOBEC3G  | 2.12E-10    | 0.269876821 | 0.397 | 0.189 | 9.44E-06    | 22 | #N/A | #N/A        |
| CBWD1     | 7.32E-12    | 0.269780894 | 0.26  | 0.096 | 3.25E-07    | 9  | #N/A | #N/A        |
| FUNDC1    | 1.81E-10    | 0.269656621 | 0.271 | 0.109 | 8.06E-06    | X  | #N/A | #N/A        |
| MSX2      | 3.15E-10    | 0.269567387 | 0.141 | 0.039 | 1.40E-05    | 5  | #N/A | #N/A        |
| TRAP1     | 5.64E-08    | 0.269472835 | 0.145 | 0.05  | 0.002507632 | 16 | #N/A | #N/A        |
| ELMSAN1   | 2.25E-05    | 0.269302033 | 0.103 | 0.04  | 1           | 14 | #N/A | #N/A        |
| CERS2     | 7.39E-09    | 0.268822829 | 0.156 | 0.053 | 0.000328517 | 1  | #N/A | #N/A        |
| COX16     | 6.26E-11    | 0.26865363  | 0.206 | 0.069 | 2.78E-06    | 14 | #N/A | #N/A        |
| ALDH1B1   | 9.13E-12    | 0.268546956 | 0.176 | 0.05  | 4.06E-07    | 9  | #N/A | #N/A        |
| SAT2      | 8.57E-07    | 0.268382882 | 0.508 | 0.307 | 0.038107286 | 17 | #N/A | #N/A        |
| LRRC41    | 3.63E-06    | 0.267837178 | 0.191 | 0.089 | 0.161444304 | 1  | #N/A | #N/A        |
| MRPS18C   | 6.42E-08    | 0.267578932 | 0.286 | 0.139 | 0.002851719 | 4  | #N/A | #N/A        |
| RNF13     | 0.000107262 | 0.267098026 | 0.156 | 0.079 | 1           | 3  | #N/A | #N/A        |
| FUS       | 5.72E-07    | 0.267026102 | 0.309 | 0.161 | 0.025429099 | 16 | #N/A | azoospermia |
| FNTB      | 3.28E-07    | 0.266904702 | 0.145 | 0.054 | 0.014598919 | 14 | #N/A | #N/A        |
| NACA      | 6.19E-09    | 0.266839106 | 0.878 | 0.688 | 0.000275053 | 12 | #N/A | #N/A        |

|           |             |              |       |       |             |    |      |             |
|-----------|-------------|--------------|-------|-------|-------------|----|------|-------------|
| HCFC1R1   | 9.25E-10    | 0.266453133  | 0.202 | 0.073 | 4.11E-05    | 16 | #N/A | #N/A        |
| SMUG1     | 1.56E-08    | 0.266431303  | 0.111 | 0.029 | 0.000691588 | 12 | #N/A | #N/A        |
| P4HB      | 9.66E-05    | 0.265982618  | 0.13  | 0.06  | 1           | 17 | #N/A | MGI:5692909 |
| UBL7      | 1.61E-08    | 0.265969488  | 0.134 | 0.041 | 0.000715104 | 15 | #N/A | #N/A        |
| HNRNPH1   | 1.14E-07    | 0.265929236  | 0.225 | 0.101 | 0.005076648 | 5  | #N/A | #N/A        |
| C6orf48   | 1.46E-09    | 0.265741254  | 0.427 | 0.221 | 6.51E-05    | 6  | #N/A | #N/A        |
| TCEAL4    | 4.01E-10    | 0.265510131  | 0.527 | 0.283 | 1.78E-05    | X  | YES  | #N/A        |
| CCDC85B   | 3.60E-06    | 0.265487503  | 0.569 | 0.379 | 0.160127891 | 11 | #N/A | #N/A        |
| BLVRA     | 3.29E-10    | 0.265386872  | 0.202 | 0.072 | 1.46E-05    | 7  | #N/A | #N/A        |
| CBR1      | 1.65E-07    | 0.26479865   | 0.244 | 0.114 | 0.007322993 | 21 | #N/A | #N/A        |
| TOMM40    | 2.08E-08    | 0.264558064  | 0.179 | 0.069 | 0.000925954 | 19 | #N/A | #N/A        |
| BCAT2     | 4.13E-08    | 0.264326637  | 0.145 | 0.049 | 0.001837121 | 19 | #N/A | #N/A        |
| CCDC12    | 2.72E-13    | 0.264312664  | 0.294 | 0.108 | 1.21E-08    | 3  | #N/A | #N/A        |
| NXF3      | 1.11E-10    | 0.264090778  | 0.252 | 0.098 | 4.92E-06    | X  | YES  | MGI:4950382 |
| COX4I1    | 8.13E-08    | 0.263938409  | 0.748 | 0.519 | 0.003613369 | 16 | #N/A | #N/A        |
| MAGEB1    | 2.03E-10    | 0.263920807  | 0.176 | 0.056 | 9.02E-06    | X  | YES  | #N/A        |
| CCNDBP1   | 4.73E-09    | 0.263597872  | 0.195 | 0.073 | 0.000210112 | 15 | #N/A | #N/A        |
| CNP       | 1.17E-13    | 0.263417697  | 0.145 | 0.03  | 5.19E-09    | 17 | #N/A | MGI:3051635 |
| CD74      | 5.17E-14    | 0.263248637  | 0.111 | 0.016 | 2.30E-09    | 5  | #N/A | #N/A        |
| ATP6V0E1  | 1.91E-08    | 0.263167604  | 0.534 | 0.315 | 0.000848095 | 5  | #N/A | #N/A        |
| SORD      | 4.59E-08    | 0.262957979  | 0.134 | 0.043 | 0.002039129 | 15 | #N/A | #N/A        |
| ZNF771    | 3.33E-09    | 0.262878084  | 0.137 | 0.04  | 0.000147934 | 16 | #N/A | #N/A        |
| SHISA4    | 1.54E-08    | 0.262722204  | 0.118 | 0.033 | 0.000685169 | 1  | #N/A | #N/A        |
| WT1       | 3.45E-05    | 0.262410079  | 0.313 | 0.186 | 1           | 11 | #N/A | MA          |
| EZR       | 9.36E-09    | 0.262280429  | 0.347 | 0.171 | 0.000415897 | 6  | #N/A | #N/A        |
| C14orf119 | 2.04E-09    | 0.262268179  | 0.256 | 0.107 | 9.05E-05    | 14 | #N/A | #N/A        |
| FAM32A    | 5.62E-09    | 0.261917166  | 0.237 | 0.099 | 0.000249864 | 19 | #N/A | #N/A        |
| NFKBIL1   | 4.55E-08    | 0.261903765  | 0.153 | 0.054 | 0.002022024 | 6  | #N/A | #N/A        |
| TMEM256   | 1.11E-10    | 0.261124089  | 0.149 | 0.04  | 4.95E-06    | 17 | #N/A | #N/A        |
| TCEAL3    | 2.59E-09    | 0.260996201  | 0.412 | 0.211 | 0.000115139 | X  | YES  | #N/A        |
| COX14     | 6.58E-10    | 0.260209758  | 0.363 | 0.174 | 2.93E-05    | 12 | #N/A | #N/A        |
| ELK1      | 1.03E-11    | 0.259978252  | 0.244 | 0.087 | 4.57E-07    | X  | YES  | MGI:3028871 |
| GSS       | 4.67E-08    | 0.259321691  | 0.218 | 0.093 | 0.002076514 | 20 | #N/A | #N/A        |
| APOO      | 1.33E-09    | 0.259127073  | 0.134 | 0.037 | 5.91E-05    | X  | YES  | #N/A        |
| PPIE      | 3.05E-09    | 0.258988803  | 0.26  | 0.111 | 0.000135461 | 1  | #N/A | #N/A        |
| STAU1     | 1.45E-09    | 0.25879395   | 0.244 | 0.1   | 6.44E-05    | 20 | #N/A | #N/A        |
| OXA1L     | 8.45E-09    | 0.258426817  | 0.183 | 0.068 | 0.000375482 | 14 | #N/A | #N/A        |
| C1orf43   | 2.49E-11    | 0.258207149  | 0.347 | 0.154 | 1.11E-06    | 1  | #N/A | #N/A        |
| CA11      | 2.47E-08    | 0.257941535  | 0.103 | 0.026 | 0.001098455 | 19 | #N/A | #N/A        |
| TMCO1     | 2.41E-05    | 0.257896532  | 0.282 | 0.164 | 1           | 1  | #N/A | MGI:5642374 |
| COPS6     | 3.06E-10    | 0.257837091  | 0.37  | 0.175 | 1.36E-05    | 7  | #N/A | #N/A        |
| RPS24     | 2.10E-09    | 0.257415534  | 0.958 | 0.869 | 9.33E-05    | 10 | #N/A | #N/A        |
| AKR1A1    | 4.30E-07    | 0.257309102  | 0.145 | 0.055 | 0.019114008 | 1  | #N/A | MGI:4239556 |
| GABARAPL2 | 3.02E-10    | 0.256937964  | 0.569 | 0.312 | 1.34E-05    | 16 | #N/A | #N/A        |
| RPA3      | 1.26E-08    | 0.256688315  | 0.389 | 0.202 | 0.000561498 | 7  | #N/A | #N/A        |
| PDCD6     | 7.22E-10    | 0.256441741  | 0.408 | 0.206 | 3.21E-05    | 5  | #N/A | #N/A        |
| APOA1     | 6.37E-06    | 0.256350423  | 0.87  | 0.674 | 0.283090874 | 11 | #N/A | #N/A        |
| UBA1      | 6.24E-07    | 0.256319848  | 0.313 | 0.168 | 0.02774288  | X  | YES  | #N/A        |
| EIF3E     | 2.59E-08    | 0.256164444  | 0.489 | 0.277 | 0.001151748 | 8  | #N/A | #N/A        |
| PLA2G16   | 1.78E-06    | 0.256115776  | 0.748 | 0.519 | 0.079101411 | 11 | #N/A | #N/A        |
| RNH1      | 9.77E-09    | 0.256032688  | 0.363 | 0.184 | 0.000434221 | 11 | #N/A | #N/A        |
| KLHDC2    | 2.47E-05    | 0.255729033  | 0.198 | 0.101 | 1           | 14 | #N/A | #N/A        |
| B3GAT3    | 8.24E-05    | 0.255590901  | 0.141 | 0.068 | 1           | 11 | #N/A | #N/A        |
| LAPTM4A   | 8.36E-06    | 0.255261545  | 0.786 | 0.584 | 0.371719851 | 2  | #N/A | #N/A        |
| UBE2D1    | 4.26E-08    | 0.255248638  | 0.134 | 0.042 | 0.001893175 | 10 | #N/A | #N/A        |
| METTL9    | 7.54E-09    | 0.255015166  | 0.191 | 0.071 | 0.000335236 | 16 | #N/A | #N/A        |
| RPL7A     | 1.23E-08    | 0.254830923  | 0.935 | 0.837 | 0.000545029 | 9  | #N/A | #N/A        |
| NDUFV1    | 3.04E-10    | 0.254671843  | 0.363 | 0.171 | 1.35E-05    | 11 | #N/A | #N/A        |
| C12orf73  | 0.00048461  | 0.254448953  | 0.134 | 0.068 | 1           | 12 | #N/A | #N/A        |
| TMEM179B  | 9.58E-07    | 0.25413368   | 0.229 | 0.111 | 0.042571172 | 11 | #N/A | #N/A        |
| IDH3G     | 5.55E-07    | 0.253824554  | 0.263 | 0.131 | 0.024679612 | X  | YES  | #N/A        |
| TMEM147   | 1.65E-08    | 0.253708574  | 0.321 | 0.157 | 0.00073184  | 19 | #N/A | #N/A        |
| PGM3      | 1.23E-06    | 0.25368479   | 0.156 | 0.064 | 0.054763135 | 6  | #N/A | MGI:3758644 |
| NARS      | 0.000123029 | 0.253632749  | 0.172 | 0.089 | 1           | 18 | #N/A | #N/A        |
| SCRG1     | 1.85E-06    | 0.253182754  | 0.653 | 0.449 | 0.082043397 | 4  | #N/A | #N/A        |
| MXRA7     | 5.22E-07    | 0.252682503  | 0.233 | 0.111 | 0.023211744 | 17 | #N/A | #N/A        |
| SRSF3     | 1.20E-08    | 0.252557523  | 0.489 | 0.275 | 0.000533667 | 6  | #N/A | #N/A        |
| SOD1      | 3.11E-08    | 0.251047909  | 0.626 | 0.383 | 0.001383971 | 21 | #N/A | MGI:1857873 |
| PIM2      | 3.97E-12    | 0.250191254  | 0.118 | 0.023 | 1.76E-07    | X  | YES  | #N/A        |
| UBE2A     | 1.74E-06    | 0.250153466  | 0.187 | 0.084 | 0.077189388 | X  | YES  | MGI:5488492 |
| LPIN2     | 0.274993891 | -0.250213732 | 0.092 | 0.112 | 1           | 18 | #N/A | MGI:5513796 |
| FAM13A    | 0.053605619 | -0.251902195 | 0.084 | 0.123 | 1           | 4  | #N/A | #N/A        |
| GCC2      | 0.050078995 | -0.25191356  | 0.073 | 0.111 | 1           | 2  | #N/A | #N/A        |
| PSMD12    | 0.757126961 | -0.252175037 | 0.16  | 0.158 | 1           | 17 | #N/A | #N/A        |
| SNAPC3    | 0.069968396 | -0.252231424 | 0.073 | 0.108 | 1           | 9  | #N/A | #N/A        |

|          |             |              |       |       |             |    |      |
|----------|-------------|--------------|-------|-------|-------------|----|------|
| RRAS2    | 0.135619626 | -0.252393139 | 0.08  | 0.108 | 1           | 11 | #N/A |
| APPBP2   | 0.425467337 | -0.25254473  | 0.16  | 0.171 | 1           | 17 | #N/A |
| ODC1     | 0.613297536 | -0.252875039 | 0.336 | 0.312 | 1           | 2  | #N/A |
| GTF2A1   | 0.155023309 | -0.253436834 | 0.076 | 0.103 | 1           | 14 | #N/A |
| HIPK1    | 0.023702246 | -0.253861824 | 0.069 | 0.115 | 1           | 1  | #N/A |
| BOD1     | 0.175803099 | -0.253955413 | 0.122 | 0.15  | 1           | 5  | #N/A |
| USP16    | 0.996362948 | -0.255135179 | 0.191 | 0.18  | 1           | 21 | #N/A |
| ZFR      | 0.614862531 | -0.25520191  | 0.13  | 0.135 | 1           | 5  | #N/A |
| FAM60A   | 0.029148879 | -0.25694203  | 0.065 | 0.108 | 1           | 12 | #N/A |
| AZGP1    | 0.074809978 | -0.257868714 | 0.069 | 0.103 | 1           | 7  | #N/A |
| MMD      | 0.215906888 | -0.258735919 | 0.088 | 0.111 | 1           | 17 | #N/A |
| RSBN1L   | 0.035564841 | -0.259202122 | 0.065 | 0.107 | 1           | 7  | #N/A |
| C21orf91 | 0.699298321 | -0.259327732 | 0.153 | 0.153 | 1           | 21 | #N/A |
| TMEM205  | 0.798029449 | -0.260168986 | 0.153 | 0.136 | 1           | 19 | #N/A |
| SIRT1    | 0.076389185 | -0.260306384 | 0.073 | 0.107 | 1           | 10 | #N/A |
| MYO6     | 0.602262533 | -0.260362981 | 0.134 | 0.137 | 1           | 6  | #N/A |
| PTEN     | 0.166014102 | -0.260396531 | 0.076 | 0.102 | 1           | 10 | #N/A |
| ZNF711   | 0.749092421 | -0.260609202 | 0.153 | 0.151 | 1           | X  | YES  |
| AP1G1    | 0.02942118  | -0.261108028 | 0.061 | 0.104 | 1           | 16 | #N/A |
| ANKS1A   | 0.031732664 | -0.261488448 | 0.073 | 0.116 | 1           | 6  | #N/A |
| SRRM2    | 0.174628204 | -0.261839288 | 0.122 | 0.15  | 1           | 16 | #N/A |
| ZNF148   | 0.076746157 | -0.262083752 | 0.084 | 0.121 | 1           | 3  | #N/A |
| HERPUD2  | 0.116966872 | -0.263014383 | 0.084 | 0.115 | 1           | 7  | #N/A |
| NOL7     | 0.395179588 | -0.263064744 | 0.221 | 0.181 | 1           | 6  | #N/A |
| AKTIP    | 0.180667782 | -0.263198576 | 0.084 | 0.109 | 1           | 16 | #N/A |
| PPP2R1B  | 0.056226435 | -0.264590009 | 0.065 | 0.101 | 1           | 11 | #N/A |
| ATPAF1   | 0.293193576 | -0.264681214 | 0.103 | 0.121 | 1           | 1  | #N/A |
| PNN      | 0.009089312 | -0.265491498 | 0.057 | 0.111 | 1           | 14 | #N/A |
| MAPK6    | 0.063629704 | -0.266130044 | 0.076 | 0.113 | 1           | 15 | #N/A |
| RYBP     | 0.412279073 | -0.266713636 | 0.095 | 0.108 | 1           | 3  | #N/A |
| SRRT     | 0.104455513 | -0.267257269 | 0.073 | 0.104 | 1           | 7  | #N/A |
| KIFC3    | 0.166552633 | -0.267405971 | 0.076 | 0.102 | 1           | 16 | #N/A |
| CSDE1    | 0.491794732 | -0.267453201 | 0.382 | 0.35  | 1           | 1  | #N/A |
| UQCC2    | 0.798274133 | -0.26782344  | 0.202 | 0.192 | 1           | 6  | #N/A |
| FGD4     | 0.004708681 | -0.268752641 | 0.069 | 0.131 | 1           | 12 | #N/A |
| FSTL3    | 0.034143231 | -0.270282689 | 0.065 | 0.105 | 1           | 19 | #N/A |
| TUBB4B   | 0.0075169   | -0.270482045 | 0.687 | 0.63  | 1           | 9  | #N/A |
| WASF1    | 0.069614702 | -0.270558934 | 0.076 | 0.112 | 1           | 6  | #N/A |
| IK       | 0.596585343 | -0.271450626 | 0.156 | 0.161 | 1           | 5  | #N/A |
| MTPN     | 0.906468295 | -0.271780057 | 0.26  | 0.236 | 1           | 7  | #N/A |
| PHF20L1  | 0.010036206 | -0.272290641 | 0.057 | 0.109 | 1           | 8  | #N/A |
| BPTF     | 0.498910548 | -0.272599318 | 0.187 | 0.193 | 1           | 17 | #N/A |
| BCLAF1   | 0.549213811 | -0.273304215 | 0.149 | 0.153 | 1           | 6  | #N/A |
| WNK3     | 0.218102923 | -0.273747756 | 0.141 | 0.165 | 1           | X  | YES  |
| GINM1    | 0.022270749 | -0.27482681  | 0.107 | 0.16  | 1           | 6  | #N/A |
| HNRNPU   | 0.567592188 | -0.275507384 | 0.24  | 0.234 | 1           | 1  | #N/A |
| SRP54    | 0.322207873 | -0.276121314 | 0.195 | 0.207 | 1           | 14 | #N/A |
| IQCG     | 0.109538878 | -0.276346898 | 0.084 | 0.116 | 1           | 3  | #N/A |
| KPNA4    | 0.133286066 | -0.277446321 | 0.103 | 0.133 | 1           | 3  | #N/A |
| SH3BP5   | 0.60965253  | -0.278293709 | 0.26  | 0.25  | 1           | 3  | #N/A |
| ZC3H11A  | 0.128469977 | -0.279697506 | 0.076 | 0.105 | 1           | 1  | #N/A |
| KIAA1217 | 0.003440004 | -0.280954546 | 0.046 | 0.103 | 1           | 10 | #N/A |
| NUFIP2   | 0.010748096 | -0.282747173 | 0.057 | 0.108 | 1           | 17 | #N/A |
| EXOC5    | 0.047352218 | -0.282933737 | 0.069 | 0.107 | 1           | 14 | #N/A |
| TTC3     | 0.108422385 | -0.28348968  | 0.126 | 0.161 | 1           | 21 | #N/A |
| MLEC     | 0.061631888 | -0.285198117 | 0.13  | 0.172 | 1           | 12 | #N/A |
| RNF19A   | 0.156556782 | -0.285276581 | 0.115 | 0.143 | 1           | 8  | #N/A |
| BCAT1    | 0.132185473 | -0.287556525 | 0.115 | 0.145 | 1           | 12 | #N/A |
| RPS2     | 2.96E-06    | -0.287828476 | 0.809 | 0.801 | 0.131504419 | 16 | #N/A |
| TMBIM4   | 0.327502469 | -0.288020937 | 0.218 | 0.23  | 1           | 12 | #N/A |
| PALLD    | 0.017397675 | -0.29157493  | 0.099 | 0.154 | 1           | 4  | #N/A |
| SETD3    | 0.384235727 | -0.291668832 | 0.13  | 0.144 | 1           | 14 | #N/A |
| ZRANB2   | 0.312545554 | -0.291729855 | 0.137 | 0.154 | 1           | 1  | #N/A |
| KPNA3    | 0.798492794 | -0.292215343 | 0.141 | 0.138 | 1           | 13 | #N/A |
| SMC4     | 0.231847033 | -0.292997978 | 0.111 | 0.133 | 1           | 3  | #N/A |
| CCT5     | 0.48354076  | -0.293836608 | 0.176 | 0.183 | 1           | 5  | #N/A |
| ACAT1    | 0.920547017 | -0.294257767 | 0.187 | 0.17  | 1           | 11 | #N/A |
| SARAF    | 0.407472833 | -0.294759209 | 0.302 | 0.29  | 1           | 8  | #N/A |
| AHCTF1   | 0.005050889 | -0.295054454 | 0.05  | 0.105 | 1           | 1  | #N/A |
| DCAF10   | 0.051876945 | -0.295439401 | 0.065 | 0.102 | 1           | 9  | #N/A |
| ZCRB1    | 0.616803866 | -0.295853461 | 0.424 | 0.376 | 1           | 12 | #N/A |
| NF1      | 0.025601484 | -0.296219967 | 0.065 | 0.109 | 1           | 17 | #N/A |
| NUP58    | 0.159487009 | -0.296401276 | 0.084 | 0.11  | 1           | 13 | #N/A |
| WNK1     | 0.116910078 | -0.29754044  | 0.168 | 0.199 | 1           | 12 | #N/A |
| RPRD1A   | 0.282491546 | -0.298109701 | 0.126 | 0.146 | 1           | 18 | #N/A |

|          |             |              |       |       |   |    |      |
|----------|-------------|--------------|-------|-------|---|----|------|
| CIR1     | 0.88447502  | -0.298310337 | 0.153 | 0.141 | 1 | 2  | #N/A |
| ETNK1    | 0.027324577 | -0.299367466 | 0.08  | 0.127 | 1 | 12 | #N/A |
| PEG10    | 0.386379606 | -0.299420402 | 0.45  | 0.395 | 1 | 7  | #N/A |
| ARHGAP5  | 0.105365116 | -0.301684183 | 0.118 | 0.151 | 1 | 14 | #N/A |
| AKAP13   | 0.017551574 | -0.30170217  | 0.076 | 0.126 | 1 | 15 | #N/A |
| TOP1     | 0.345091702 | -0.30172914  | 0.172 | 0.185 | 1 | 20 | #N/A |
| CALD1    | 0.201225451 | -0.303740828 | 0.321 | 0.317 | 1 | 7  | #N/A |
| PPP1R11  | 0.172202572 | -0.308514439 | 0.095 | 0.121 | 1 | 6  | #N/A |
| SMC6     | 0.019342698 | -0.309051606 | 0.08  | 0.13  | 1 | 2  | #N/A |
| PPP1R14B | 0.056088511 | -0.309245729 | 0.065 | 0.101 | 1 | 11 | #N/A |
| DYNC1H1  | 0.054996192 | -0.309785314 | 0.095 | 0.136 | 1 | 14 | #N/A |
| TRAPPC2L | 0.542942164 | -0.310904451 | 0.156 | 0.16  | 1 | 16 | #N/A |
| MED21    | 0.161947698 | -0.311238874 | 0.126 | 0.154 | 1 | 12 | #N/A |
| SYNCRIP  | 0.031735241 | -0.311884807 | 0.092 | 0.137 | 1 | 6  | #N/A |
| UTP18    | 0.14014597  | -0.312408412 | 0.08  | 0.107 | 1 | 17 | #N/A |
| BAZ2B    | 0.007455688 | -0.313832098 | 0.057 | 0.111 | 1 | 2  | #N/A |
| SPTAN1   | 0.204107583 | -0.313877084 | 0.126 | 0.149 | 1 | 9  | #N/A |
| MAP4     | 0.134762985 | -0.314826794 | 0.137 | 0.167 | 1 | 3  | #N/A |
| CSNK1D   | 0.555865104 | -0.315038561 | 0.172 | 0.173 | 1 | 17 | #N/A |
| UBE2H    | 0.232934209 | -0.315163397 | 0.179 | 0.199 | 1 | 7  | #N/A |
| SPIN1    | 0.208146324 | -0.315627699 | 0.107 | 0.13  | 1 | 9  | #N/A |
| ARAP2    | 0.013273236 | -0.316279329 | 0.065 | 0.115 | 1 | 4  | #N/A |
| DDX39A   | 0.217636152 | -0.318328032 | 0.084 | 0.105 | 1 | 19 | #N/A |
| FOPNL    | 0.090808507 | -0.318552378 | 0.115 | 0.15  | 1 | 16 | #N/A |
| H2AFV    | 0.313692959 | -0.319821293 | 0.149 | 0.165 | 1 | 7  | #N/A |
| PDCD5    | 0.818970454 | -0.321329817 | 0.389 | 0.337 | 1 | 19 | #N/A |
| DNPEP    | 0.006735146 | -0.322724899 | 0.061 | 0.118 | 1 | 2  | #N/A |
| PDXDC1   | 0.132109271 | -0.325156471 | 0.076 | 0.104 | 1 | 16 | #N/A |
| STX8     | 0.611188439 | -0.325501743 | 0.229 | 0.221 | 1 | 17 | #N/A |
| TUBG1    | 0.349417247 | -0.32631442  | 0.176 | 0.185 | 1 | 17 | #N/A |
| SAR1B    | 0.396658675 | -0.326976827 | 0.122 | 0.136 | 1 | 5  | #N/A |
| FAM192A  | 0.081753    | -0.327518641 | 0.095 | 0.131 | 1 | 16 | #N/A |
| TMBIM6   | 0.030054809 | -0.327729729 | 0.336 | 0.369 | 1 | 12 | #N/A |
| LSM4     | 0.637592562 | -0.328391948 | 0.302 | 0.277 | 1 | 19 | #N/A |
| TAF9     | 0.172898527 | -0.328419511 | 0.233 | 0.251 | 1 | 5  | #N/A |
| KATNA1   | 0.099310232 | -0.330351903 | 0.095 | 0.128 | 1 | 6  | #N/A |
| KTN1     | 0.075013265 | -0.330372229 | 0.24  | 0.272 | 1 | 14 | #N/A |
| SOD2     | 0.004888256 | -0.332426415 | 0.061 | 0.12  | 1 | 6  | #N/A |
| GOSR2    | 0.717448432 | -0.333122833 | 0.156 | 0.153 | 1 | 17 | #N/A |
| UBE2M    | 0.105489388 | -0.334351782 | 0.126 | 0.158 | 1 | 19 | #N/A |
| MACF1    | 0.004473171 | -0.334381677 | 0.053 | 0.11  | 1 | 1  | #N/A |
| PIK3C2A  | 0.019266948 | -0.334488199 | 0.088 | 0.138 | 1 | 11 | #N/A |
| SERBP1   | 0.271657825 | -0.335887697 | 0.363 | 0.346 | 1 | 1  | #N/A |
| SRSF9    | 0.264669556 | -0.336676022 | 0.485 | 0.422 | 1 | 12 | #N/A |
| TCEA2    | 0.009510129 | -0.337464625 | 0.103 | 0.163 | 1 | 20 | #N/A |
| ROCK1    | 0.004236971 | -0.337509551 | 0.046 | 0.101 | 1 | 18 | #N/A |
| SEC14L1  | 0.385676872 | -0.340004042 | 0.24  | 0.24  | 1 | 17 | #N/A |
| KMT2C    | 0.006390018 | -0.340872214 | 0.069 | 0.125 | 1 | 7  | #N/A |
| ADSS     | 0.102222752 | -0.341122796 | 0.115 | 0.148 | 1 | 1  | #N/A |
| SNF8     | 0.402793465 | -0.342304061 | 0.141 | 0.152 | 1 | 17 | #N/A |
| RCOR3    | 0.016700641 | -0.343323463 | 0.065 | 0.112 | 1 | 1  | #N/A |
| LSM12    | 0.068431033 | -0.343623654 | 0.111 | 0.148 | 1 | 17 | #N/A |
| BOD1L1   | 0.005325229 | -0.344300181 | 0.099 | 0.165 | 1 | 4  | #N/A |
| ZPR1     | 0.190083505 | -0.346017963 | 0.095 | 0.119 | 1 | 11 | #N/A |
| ZBTB20   | 0.005793582 | -0.346139485 | 0.073 | 0.132 | 1 | 3  | #N/A |
| ABCF1    | 0.057944689 | -0.346443852 | 0.084 | 0.121 | 1 | 6  | #N/A |
| PHF20    | 0.037849333 | -0.346862557 | 0.092 | 0.135 | 1 | 20 | #N/A |
| EIF5     | 0.153985986 | -0.346924397 | 0.305 | 0.312 | 1 | 14 | #N/A |
| ZNF451   | 0.006296177 | -0.346967367 | 0.065 | 0.121 | 1 | 6  | #N/A |
| TEX30    | 0.06053651  | -0.347510796 | 0.145 | 0.185 | 1 | 13 | #N/A |
| SFPQ     | 0.120218116 | -0.348064488 | 0.156 | 0.184 | 1 | 1  | #N/A |
| CDC5L    | 0.224601069 | -0.348877546 | 0.172 | 0.189 | 1 | 6  | #N/A |
| DYNLT3   | 0.077063769 | -0.349743957 | 0.099 | 0.135 | 1 | X  | YES  |
| UBFD1    | 0.008992516 | -0.350465734 | 0.08  | 0.136 | 1 | 16 | #N/A |
| DCAF5    | 0.017295042 | -0.351404702 | 0.069 | 0.117 | 1 | 14 | #N/A |
| C2orf74  | 0.836592553 | -0.35149085  | 0.176 | 0.165 | 1 | 2  | #N/A |
| PRRC2C   | 0.055534405 | -0.353736375 | 0.149 | 0.187 | 1 | 1  | #N/A |
| ZNHIT3   | 0.174555106 | -0.355656803 | 0.153 | 0.178 | 1 | 17 | #N/A |
| REST     | 0.049026656 | -0.358952094 | 0.084 | 0.123 | 1 | 4  | #N/A |
| RB1CC1   | 0.000111736 | -0.359178011 | 0.027 | 0.102 | 1 | 8  | #N/A |
| MORC4    | 0.003676527 | -0.35931953  | 0.057 | 0.116 | 1 | X  | YES  |
| PINK1    | 0.008211067 | -0.360223471 | 0.08  | 0.137 | 1 | 1  | #N/A |
| BCAP29   | 0.057456018 | -0.36026037  | 0.122 | 0.162 | 1 | 7  | #N/A |
| CAPRIN1  | 0.068805541 | -0.362329677 | 0.153 | 0.191 | 1 | 11 | #N/A |
| SPAG9    | 0.095305992 | -0.362548958 | 0.107 | 0.14  | 1 | 17 | #N/A |



|           |             |              |       |       |             |    |      |
|-----------|-------------|--------------|-------|-------|-------------|----|------|
| PTP4A2    | 0.156274083 | -0.362613059 | 0.206 | 0.225 | 1           | 1  | #N/A |
| PAPOLA    | 0.044633589 | -0.363404782 | 0.252 | 0.289 | 1           | 14 | #N/A |
| ZNF106    | 0.032660113 | -0.364551954 | 0.145 | 0.19  | 1           | 15 | #N/A |
| KDM5B     | 0.019945879 | -0.36512164  | 0.107 | 0.158 | 1           | 1  | #N/A |
| ANKRD12   | 0.036497821 | -0.366390675 | 0.095 | 0.138 | 1           | 18 | #N/A |
| FUNDC2    | 0.217697078 | -0.368153139 | 0.24  | 0.249 | 1           | X  | YES  |
| TROVE2    | 0.016066578 | -0.368825431 | 0.13  | 0.185 | 1           | 1  | #N/A |
| THUMPD3   | 0.035298688 | -0.369162603 | 0.084 | 0.127 | 1           | 3  | #N/A |
| OXR1      | 0.047847578 | -0.369294271 | 0.111 | 0.153 | 1           | 8  | #N/A |
| ZNF706    | 0.358840067 | -0.369449494 | 0.282 | 0.275 | 1           | 8  | #N/A |
| SMAP1     | 0.011065244 | -0.371212048 | 0.088 | 0.143 | 1           | 6  | #N/A |
| DIAPH2    | 0.117258111 | -0.371907329 | 0.122 | 0.152 | 1           | X  | YES  |
| MAP1B     | 0.047411727 | -0.372801348 | 0.198 | 0.233 | 1           | 5  | #N/A |
| C11orf1   | 0.405702989 | -0.374478651 | 0.244 | 0.241 | 1           | 11 | #N/A |
| MTCH2     | 0.482002114 | -0.374872716 | 0.198 | 0.198 | 1           | 11 | #N/A |
| DDX3X     | 0.030700812 | -0.37654614  | 0.118 | 0.165 | 1           | X  | #N/A |
| UBE2R2    | 0.166265307 | -0.379380969 | 0.191 | 0.21  | 1           | 9  | #N/A |
| EIF3A     | 0.037681388 | -0.381983131 | 0.122 | 0.166 | 1           | 10 | #N/A |
| GHITM     | 0.017502382 | -0.382628555 | 0.523 | 0.485 | 1           | 10 | #N/A |
| AGPAT3    | 0.004189818 | -0.386893583 | 0.05  | 0.105 | 1           | 21 | #N/A |
| RANBP2    | 0.001450551 | -0.387281297 | 0.046 | 0.109 | 1           | 2  | #N/A |
| UTRN      | 0.00023618  | -0.388575207 | 0.038 | 0.113 | 1           | 6  | #N/A |
| EIF4G3    | 0.002424181 | -0.388595808 | 0.061 | 0.124 | 1           | 1  | #N/A |
| STK11     | 0.009864759 | -0.389786861 | 0.076 | 0.13  | 1           | 19 | #N/A |
| MRPL36    | 0.343120745 | -0.390093783 | 0.26  | 0.258 | 1           | 5  | #N/A |
| WAPL      | 0.01865873  | -0.390639948 | 0.095 | 0.145 | 1           | 10 | #N/A |
| MYO9A     | 2.96E-05    | -0.39193415  | 0.027 | 0.11  | 1           | 15 | #N/A |
| GSPT1     | 0.001353803 | -0.393060991 | 0.069 | 0.139 | 1           | 16 | #N/A |
| MRPL51    | 0.010464356 | -0.394047625 | 0.527 | 0.508 | 1           | 12 | #N/A |
| PPP1R12A  | 0.285970658 | -0.39708007  | 0.149 | 0.164 | 1           | 12 | #N/A |
| TPGS2     | 0.010487415 | -0.402583143 | 0.122 | 0.183 | 1           | 18 | #N/A |
| FRMD6     | 0.004414022 | -0.404115316 | 0.057 | 0.114 | 1           | 14 | #N/A |
| SBNO1     | 0.000270501 | -0.405569772 | 0.046 | 0.122 | 1           | 12 | #N/A |
| SECISBP2  | 0.007518057 | -0.409397165 | 0.08  | 0.137 | 1           | 9  | #N/A |
| TSPYL5    | 0.00313426  | -0.410092563 | 0.065 | 0.126 | 1           | 8  | #N/A |
| ATMIN     | 0.000471019 | -0.412064122 | 0.046 | 0.118 | 1           | 16 | #N/A |
| EPB41L2   | 0.00393853  | -0.412619364 | 0.099 | 0.165 | 1           | 6  | #N/A |
| STK35     | 0.006908875 | -0.412869108 | 0.053 | 0.105 | 1           | 20 | #N/A |
| ATP5S     | 0.040251832 | -0.413258022 | 0.069 | 0.107 | 1           | 14 | #N/A |
| C14orf28  | 0.000916794 | -0.415601491 | 0.038 | 0.103 | 1           | 14 | #N/A |
| SLC25A33  | 0.007127876 | -0.415898945 | 0.069 | 0.124 | 1           | 1  | #N/A |
| RANBP9    | 0.006630354 | -0.417614448 | 0.057 | 0.11  | 1           | 6  | #N/A |
| LZIC      | 0.003714727 | -0.418101558 | 0.061 | 0.121 | 1           | 1  | #N/A |
| QKI       | 0.048325274 | -0.418424167 | 0.244 | 0.272 | 1           | 6  | #N/A |
| CCDC186   | 0.00374483  | -0.418474877 | 0.08  | 0.143 | 1           | 10 | #N/A |
| DYNC1L1I2 | 0.001035611 | -0.420259719 | 0.05  | 0.117 | 1           | 16 | #N/A |
| DNAJB9    | 0.010127482 | -0.423650563 | 0.057 | 0.106 | 1           | 7  | #N/A |
| RER1      | 0.035675189 | -0.426337756 | 0.202 | 0.243 | 1           | 1  | #N/A |
| HLTF      | 0.012202094 | -0.42797589  | 0.248 | 0.297 | 1           | 3  | #N/A |
| CITED4    | 0.01160391  | -0.430406162 | 0.118 | 0.172 | 1           | 1  | #N/A |
| NBR1      | 0.008971191 | -0.431428513 | 0.092 | 0.148 | 1           | 17 | #N/A |
| GPI       | 0.023021874 | -0.434438408 | 0.069 | 0.113 | 1           | 19 | #N/A |
| CFAP97    | 0.00133191  | -0.436223105 | 0.073 | 0.143 | 1           | 4  | #N/A |
| PAIP2     | 0.014256895 | -0.436887145 | 0.508 | 0.488 | 1           | 5  | #N/A |
| REG3G     | 0.000154865 | -0.440150013 | 0.073 | 0.16  | 1           | 2  | #N/A |
| AHI1      | 0.006206586 | -0.442596687 | 0.073 | 0.13  | 1           | 6  | #N/A |
| JAK1      | 0.001002572 | -0.442958655 | 0.053 | 0.121 | 1           | 1  | #N/A |
| USP7      | 0.000360226 | -0.443983746 | 0.061 | 0.138 | 1           | 16 | #N/A |
| AASDHPPT  | 0.020233052 | -0.444306274 | 0.122 | 0.172 | 1           | 11 | #N/A |
| MRPL42    | 0.028859294 | -0.447785107 | 0.099 | 0.145 | 1           | 12 | #N/A |
| POLR2I    | 0.035941376 | -0.448340451 | 0.37  | 0.378 | 1           | 19 | #N/A |
| WIPI2     | 0.049718857 | -0.448870791 | 0.179 | 0.216 | 1           | 7  | #N/A |
| SNAP29    | 0.003619827 | -0.449190957 | 0.103 | 0.169 | 1           | 22 | #N/A |
| ARID2     | 0.00127767  | -0.450934602 | 0.065 | 0.135 | 1           | 12 | #N/A |
| STK40     | 0.003140041 | -0.451529316 | 0.092 | 0.157 | 1           | 1  | #N/A |
| DNAJC2    | 0.000346855 | -0.453363721 | 0.046 | 0.121 | 1           | 7  | #N/A |
| BAZ1A     | 0.03321844  | -0.456010832 | 0.16  | 0.204 | 1           | 14 | #N/A |
| SOCS7     | 8.47E-05    | -0.456394051 | 0.031 | 0.107 | 1           | 17 | #N/A |
| GIGYF2    | 0.003165941 | -0.459222819 | 0.08  | 0.144 | 1           | 2  | #N/A |
| KIF2A     | 1.91E-05    | -0.45970341  | 0.027 | 0.113 | 0.848496141 | 5  | #N/A |
| CANX      | 0.000119084 | -0.460817691 | 0.088 | 0.183 | 1           | 5  | #N/A |
| CREB1     | 0.000194613 | -0.460973183 | 0.042 | 0.119 | 1           | 2  | #N/A |
| PSMC5     | 0.028776288 | -0.463058051 | 0.271 | 0.303 | 1           | 17 | #N/A |
| C6orf89   | 5.64E-05    | -0.463342965 | 0.046 | 0.133 | 1           | 6  | #N/A |
| PSMA4     | 0.009872866 | -0.464398998 | 0.275 | 0.317 | 1           | 15 | #N/A |

|           |             |              |       |       |             |    |      |
|-----------|-------------|--------------|-------|-------|-------------|----|------|
| VPS53     | 3.35E-06    | -0.465532359 | 0.023 | 0.119 | 0.148975054 | 17 | #N/A |
| MED7      | 0.023849933 | -0.472364039 | 0.088 | 0.133 | 1           | 5  | #N/A |
| CCDC34    | 0.00560928  | -0.472538043 | 0.103 | 0.166 | 1           | 11 | #N/A |
| TRAPPC12  | 1.93E-05    | -0.474212489 | 0.05  | 0.148 | 0.85749118  | 2  | #N/A |
| URI1      | 0.00721538  | -0.475272489 | 0.103 | 0.161 | 1           | 19 | #N/A |
| SUN1      | 1.62E-05    | -0.480834504 | 0.038 | 0.132 | 0.721796205 | 7  | #N/A |
| RORA      | 0.001886619 | -0.482830119 | 0.122 | 0.193 | 1           | 15 | #N/A |
| CCT2      | 0.007124528 | -0.487139226 | 0.248 | 0.302 | 1           | 12 | #N/A |
| PCMT1     | 0.042578414 | -0.487719278 | 0.317 | 0.332 | 1           | 6  | #N/A |
| SYNE2     | 0.022634425 | -0.489279503 | 0.134 | 0.181 | 1           | 14 | #N/A |
| DHX36     | 0.008436984 | -0.492554088 | 0.198 | 0.251 | 1           | 3  | #N/A |
| LYRM1     | 0.00049807  | -0.494949285 | 0.061 | 0.136 | 1           | 16 | #N/A |
| NLK       | 0.000172344 | -0.495829398 | 0.034 | 0.108 | 1           | 17 | #N/A |
| THAP5     | 4.16E-05    | -0.498440368 | 0.073 | 0.171 | 1           | 7  | #N/A |
| CCDC57    | 6.77E-06    | -0.499825128 | 0.023 | 0.114 | 0.300733841 | 17 | #N/A |
| AGFG1     | 2.11E-05    | -0.502384732 | 0.031 | 0.117 | 0.938673003 | 2  | #N/A |
| ARID4B    | 9.15E-05    | -0.502451719 | 0.073 | 0.164 | 1           | 1  | #N/A |
| CWC15     | 0.010892165 | -0.503260557 | 0.317 | 0.345 | 1           | 11 | #N/A |
| ID4       | 0.003114853 | -0.512221788 | 0.141 | 0.206 | 1           | 6  | #N/A |
| YJEFN3    | 1.92E-06    | -0.512283888 | 0.011 | 0.103 | 0.085127668 | 19 | #N/A |
| UBL3      | 0.019233015 | -0.51245282  | 0.16  | 0.207 | 1           | 13 | #N/A |
| PABPC1    | 0.000151567 | -0.512718453 | 0.412 | 0.455 | 1           | 8  | #N/A |
| SYCE3     | 3.46E-06    | -0.517717631 | 0.015 | 0.105 | 0.153976155 | 22 | #N/A |
| EEF2KMT   | 0.000147039 | -0.519188591 | 0.031 | 0.103 | 1           | 16 | #N/A |
| CCK       | 6.10E-08    | -0.52101868  | 0.008 | 0.118 | 0.002711426 | 3  | #N/A |
| CHPT1     | 2.19E-06    | -0.521935494 | 0.027 | 0.127 | 0.097270627 | 12 | #N/A |
| NAA38     | 0.003576492 | -0.524364733 | 0.225 | 0.287 | 1           | 17 | #N/A |
| HABP4     | 5.17E-05    | -0.526401758 | 0.034 | 0.116 | 1           | 9  | #N/A |
| BACE1     | 5.11E-06    | -0.527557388 | 0.023 | 0.115 | 0.227367456 | 11 | #N/A |
| TXNL4A    | 0.002377515 | -0.529336769 | 0.149 | 0.218 | 1           | 18 | #N/A |
| RAD17     | 0.000133708 | -0.52956578  | 0.05  | 0.13  | 1           | 5  | #N/A |
| DDX3Y     | 0.003418666 | -0.529997513 | 0.095 | 0.159 | 1           | Y  | #N/A |
| SLAIN2    | 2.20E-07    | -0.531262112 | 0.011 | 0.116 | 0.009777367 | 4  | #N/A |
| EHBP1     | 2.81E-05    | -0.534057284 | 0.027 | 0.109 | 1           | 2  | #N/A |
| CCDC90B   | 0.003780353 | -0.535845686 | 0.26  | 0.311 | 1           | 11 | #N/A |
| CCDC88A   | 1.11E-05    | -0.545850619 | 0.057 | 0.16  | 0.494837465 | 2  | #N/A |
| HMOX2     | 0.000438496 | -0.548305872 | 0.118 | 0.203 | 1           | 16 | #N/A |
| ATP6V1A   | 0.001241527 | -0.548844351 | 0.08  | 0.151 | 1           | 3  | #N/A |
| C4orf36   | 5.19E-08    | -0.550053758 | 0.004 | 0.111 | 0.002305343 | 4  | #N/A |
| RAD23B    | 0.000937666 | -0.554216561 | 0.153 | 0.23  | 1           | 9  | #N/A |
| TRIP12    | 0.000159371 | -0.555405096 | 0.069 | 0.153 | 1           | 2  | #N/A |
| DESI2     | 1.01E-05    | -0.555908236 | 0.065 | 0.169 | 0.44729994  | 1  | #N/A |
| CNN1      | 2.86E-06    | -0.559805234 | 0.027 | 0.125 | 0.12730653  | 19 | #N/A |
| DGCR6     | 4.27E-06    | -0.564107218 | 0.019 | 0.109 | 0.189711363 | 22 | #N/A |
| MRPL41    | 6.96E-05    | -0.564282362 | 0.137 | 0.238 | 1           | 9  | #N/A |
| HSP90AA1  | 4.27E-07    | -0.56476345  | 0.595 | 0.6   | 0.018985347 | 14 | #N/A |
| LRRD1     | 1.23E-07    | -0.565002802 | 0.008 | 0.114 | 0.005456008 | 7  | #N/A |
| C1QTNF3   | 1.62E-06    | -0.569392274 | 0.011 | 0.104 | 0.072232275 | 5  | #N/A |
| FHL1      | 2.58E-06    | -0.571881353 | 0.031 | 0.131 | 0.114535957 | X  | YES  |
| CA2       | 5.79E-05    | -0.575141477 | 0.038 | 0.121 | 1           | 8  | #N/A |
| FAM71F2   | 2.75E-07    | -0.576510727 | 0.004 | 0.101 | 0.012234163 | 7  | #N/A |
| RBL2      | 1.81E-06    | -0.581511772 | 0.027 | 0.127 | 0.080343172 | 16 | #N/A |
| TNFAIP8L1 | 5.21E-08    | -0.583702737 | 0.011 | 0.126 | 0.002315082 | 19 | #N/A |
| RNF168    | 1.12E-05    | -0.584474727 | 0.027 | 0.115 | 0.496259087 | 3  | #N/A |
| LYL1      | 1.19E-07    | -0.589429567 | 0.011 | 0.12  | 0.005276261 | 19 | #N/A |
| UBXN4     | 0.000309657 | -0.593600053 | 0.202 | 0.286 | 1           | 2  | #N/A |
| GMPS      | 0.00010457  | -0.594917114 | 0.115 | 0.209 | 1           | 3  | #N/A |
| ACP1      | 3.14E-05    | -0.599637699 | 0.397 | 0.458 | 1           | 2  | #N/A |
| CDHR2     | 1.06E-08    | -0.610524633 | 0     | 0.114 | 0.000471547 | 5  | #N/A |
| MSTO1     | 1.68E-07    | -0.6107142   | 0.019 | 0.131 | 0.00745382  | 1  | #N/A |
| PSORS1C1  | 2.09E-08    | -0.620021986 | 0.004 | 0.117 | 0.000928487 | 6  | #N/A |
| TUBA3D    | 2.83E-07    | -0.623128299 | 0.011 | 0.114 | 0.01256926  | 2  | #N/A |
| GNAS      | 3.22E-10    | -0.626154279 | 0.477 | 0.572 | 1.43E-05    | 20 | #N/A |
| LARP1B    | 5.95E-07    | -0.631334799 | 0.023 | 0.129 | 0.026465043 | 4  | #N/A |
| RIBC1     | 2.64E-08    | -0.631628367 | 0     | 0.108 | 0.001171583 | X  | #N/A |
| GLIPR1L2  | 9.51E-08    | -0.636545215 | 0.004 | 0.107 | 0.004228299 | 12 | #N/A |
| YWHAZ     | 3.85E-06    | -0.638013367 | 0.332 | 0.427 | 0.170978343 | 8  | #N/A |
| GLRX5     | 2.20E-06    | -0.645357845 | 0.252 | 0.366 | 0.097972753 | 14 | #N/A |
| KHDRBS3   | 2.68E-06    | -0.649117873 | 0.092 | 0.21  | 0.11921951  | 8  | #N/A |
| HIP1      | 9.93E-08    | -0.651267207 | 0.015 | 0.127 | 0.004415863 | 7  | #N/A |
| FAM76B    | 4.50E-08    | -0.652350614 | 0.023 | 0.145 | 0.001999779 | 11 | #N/A |
| UBE2J1    | 1.56E-05    | -0.65453323  | 0.103 | 0.209 | 0.695086401 | 6  | #N/A |
| HYPM      | 1.95E-08    | -0.65542152  | 0     | 0.11  | 0.000865674 | X  | YES  |
| FLJ27354  | 2.23E-06    | -0.656051213 | 0.053 | 0.164 | 0.099014051 | 1  | #N/A |
| NOL10     | 6.00E-07    | -0.665891307 | 0.019 | 0.121 | 0.026656036 | 2  | #N/A |

|           |             |              |       |       |             |    |      |
|-----------|-------------|--------------|-------|-------|-------------|----|------|
| TMEM53    | 6.78E-09    | -0.66704471  | 0.008 | 0.132 | 0.000301599 | 1  | #N/A |
| DNAJC21   | 1.17E-06    | -0.66941647  | 0.069 | 0.186 | 0.052114269 | 5  | #N/A |
| RAB21     | 1.13E-06    | -0.673876853 | 0.073 | 0.193 | 0.050038157 | 12 | #N/A |
| METAP1    | 0.000150598 | -0.675162442 | 0.115 | 0.203 | 1           | 4  | #N/A |
| ACAP1     | 4.25E-05    | -0.683423036 | 0.103 | 0.201 | 1           | 17 | #N/A |
| DGCR6L    | 7.90E-05    | -0.685158513 | 0.26  | 0.341 | 1           | 22 | #N/A |
| MRGBP     | 1.62E-08    | -0.686051284 | 0.042 | 0.18  | 0.000719337 | 20 | #N/A |
| GSKIP     | 4.43E-07    | -0.688836888 | 0.034 | 0.147 | 0.019703752 | 14 | #N/A |
| PARD6A    | 1.95E-07    | -0.688841276 | 0.011 | 0.116 | 0.008672097 | 16 | #N/A |
| ZNF91     | 2.83E-07    | -0.689835878 | 0.053 | 0.176 | 0.012591831 | 19 | #N/A |
| SURF2     | 1.78E-06    | -0.701116757 | 0.092 | 0.211 | 0.079259553 | 9  | #N/A |
| SYPL1     | 5.61E-08    | -0.703708406 | 0.107 | 0.255 | 0.002491992 | 7  | #N/A |
| UBTD2     | 1.43E-07    | -0.705296005 | 0.05  | 0.175 | 0.0063406   | 5  | #N/A |
| PAQR7     | 1.93E-06    | -0.705373003 | 0.164 | 0.288 | 0.085852107 | 1  | #N/A |
| LPP       | 2.22E-07    | -0.710341614 | 0.088 | 0.221 | 0.009872936 | 3  | #N/A |
| C15orf48  | 3.46E-08    | -0.710947433 | 0.011 | 0.127 | 0.001538103 | 15 | #N/A |
| SRPK1     | 2.99E-09    | -0.720319594 | 0.023 | 0.161 | 0.00013275  | 6  | #N/A |
| GOLM1     | 5.05E-09    | -0.722509724 | 0.008 | 0.133 | 0.000224599 | 9  | #N/A |
| BZW1      | 4.77E-09    | -0.725530465 | 0.42  | 0.513 | 0.000212185 | 2  | #N/A |
| LSM14B    | 3.24E-09    | -0.728263014 | 0.023 | 0.16  | 0.000143979 | 20 | #N/A |
| EFHD2     | 1.47E-07    | -0.731722191 | 0.29  | 0.402 | 0.006553754 | 1  | #N/A |
| SBDS      | 5.13E-06    | -0.732088416 | 0.256 | 0.356 | 0.227967374 | 7  | #N/A |
| GOLGA4    | 1.73E-07    | -0.735801707 | 0.073 | 0.202 | 0.007694417 | 3  | #N/A |
| LURAP1    | 2.39E-09    | -0.741541286 | 0.004 | 0.13  | 0.000106434 | 1  | #N/A |
| LYPLA1    | 4.32E-07    | -0.751053658 | 0.263 | 0.378 | 0.019192199 | 8  | #N/A |
| TPR       | 6.46E-08    | -0.763962997 | 0.069 | 0.204 | 0.00287086  | 1  | #N/A |
| PCM1      | 1.25E-07    | -0.7664025   | 0.053 | 0.181 | 0.005566523 | 8  | #N/A |
| LRRFIP2   | 5.21E-08    | -0.768059316 | 0.042 | 0.169 | 0.002316503 | 3  | #N/A |
| CSNK2A2   | 1.01E-10    | -0.769279495 | 0.023 | 0.18  | 4.48E-06    | 16 | #N/A |
| ZFAND3    | 1.34E-06    | -0.784689842 | 0.16  | 0.281 | 0.059518815 | 6  | #N/A |
| C5orf52   | 1.20E-10    | -0.807297139 | 0.004 | 0.148 | 5.32E-06    | 5  | #N/A |
| UBE2S     | 1.09E-08    | -0.814206878 | 0.126 | 0.277 | 0.000482723 | 19 | #N/A |
| CDC34     | 2.32E-11    | -0.814795502 | 0.034 | 0.208 | 1.03E-06    | 19 | #N/A |
| CENPU     | 4.94E-10    | -0.818260166 | 0.023 | 0.17  | 2.20E-05    | 4  | #N/A |
| MIR193BHG | 1.99E-10    | -0.818675853 | 0.004 | 0.145 | 8.83E-06    | 16 | #N/A |
| ATP1B3    | 3.42E-09    | -0.820270581 | 0.05  | 0.198 | 0.000152107 | 3  | #N/A |
| BRI3      | 3.81E-10    | -0.828211854 | 0.149 | 0.323 | 1.69E-05    | 7  | #N/A |
| CDV3      | 4.71E-09    | -0.832071805 | 0.149 | 0.304 | 0.000209473 | 3  | #N/A |
| MZT2B     | 3.36E-15    | -0.836934685 | 0.385 | 0.548 | 1.49E-10    | 2  | #N/A |
| FXR1      | 1.92E-10    | -0.838746639 | 0.191 | 0.366 | 8.53E-06    | 3  | #N/A |
| MAP2K2    | 1.38E-09    | -0.840975744 | 0.08  | 0.243 | 6.13E-05    | 19 | #N/A |
| AKAP14    | 1.43E-11    | -0.846386342 | 0.011 | 0.175 | 6.36E-07    | X  | YES  |
| EIF4H     | 1.63E-10    | -0.848383596 | 0.137 | 0.318 | 7.25E-06    | 7  | #N/A |
| CTAG2     | 4.55E-11    | -0.858834075 | 0     | 0.147 | 2.02E-06    | X  | YES  |
| SPATA8    | 3.02E-11    | -0.866210618 | 0.015 | 0.175 | 1.34E-06    | 15 | #N/A |
| RPL39L    | 4.13E-09    | -0.86802526  | 0.103 | 0.26  | 0.000183719 | 3  | #N/A |
| AKIRIN1   | 1.53E-11    | -0.868355448 | 0.294 | 0.457 | 6.82E-07    | 1  | #N/A |
| MEX3D     | 1.57E-11    | -0.88008399  | 0.031 | 0.202 | 7.00E-07    | 19 | #N/A |
| DDX4      | 3.93E-12    | -0.887476601 | 0.008 | 0.174 | 1.75E-07    | 5  | #N/A |
| AKAP12    | 1.87E-10    | -0.899768438 | 0.168 | 0.338 | 8.32E-06    | 6  | #N/A |
| COX8C     | 7.63E-14    | -0.968006575 | 0.008 | 0.196 | 3.39E-09    | 14 | #N/A |
| SPATA22   | 1.87E-14    | -0.992093615 | 0.015 | 0.216 | 8.31E-10    | 17 | #N/A |
| TUBA3C    | 1.61E-13    | -1.009931024 | 0.023 | 0.216 | 7.17E-09    | 13 | #N/A |
| HIST1H2AA | 2.31E-15    | -1.030077128 | 0.004 | 0.209 | 1.03E-10    | 6  | #N/A |
| PRKAR2A   | 6.95E-16    | -1.074657101 | 0.015 | 0.233 | 3.09E-11    | 3  | #N/A |
| COPRS     | 5.22E-16    | -1.136428068 | 0.08  | 0.315 | 2.32E-11    | 17 | #N/A |
| BAG1      | 1.22E-21    | -1.167388369 | 0.237 | 0.508 | 5.43E-17    | 9  | #N/A |
| CRNDE     | 3.63E-20    | -1.195177687 | 0.023 | 0.295 | 1.61E-15    | 16 | #N/A |
| PGP       | 4.98E-19    | -1.229070865 | 0.153 | 0.419 | 2.22E-14    | 16 | #N/A |
| DYNLL2    | 5.77E-21    | -1.282115547 | 0.092 | 0.38  | 2.56E-16    | 17 | #N/A |

## logFC&gt;0.5

|          | p_val     | avg_logFC   | pct.1 | pct.2 | p_val_adj | CHRO | NXI GENE | MGI database |
|----------|-----------|-------------|-------|-------|-----------|------|----------|--------------|
| MIF      | 3.03E-103 | 1.671323685 | 0.84  | 0.234 | 1.35E-98  | 22   | #N/A     | #N/A         |
| RPL36A   | 4.64E-100 | 1.637040069 | 0.821 | 0.203 | 2.06E-95  | X    | YES      | #N/A         |
| RPL17    | 1.98E-91  | 1.441726647 | 0.805 | 0.195 | 8.78E-87  | 18   | #N/A     | #N/A         |
| RPS17    | 8.35E-95  | 1.372976856 | 0.943 | 0.443 | 3.71E-90  | 15   | #N/A     | #N/A         |
| RPS21    | 3.87E-97  | 1.370619916 | 0.958 | 0.543 | 1.72E-92  | 20   | #N/A     | #N/A         |
| RPL31    | 4.33E-92  | 1.283515584 | 0.969 | 0.581 | 1.92E-87  | 2    | #N/A     | #N/A         |
| RPL41    | 3.92E-107 | 1.259251934 | 0.996 | 0.87  | 1.74E-102 | 12   | #N/A     | #N/A         |
| ACTB     | 1.44E-93  | 1.249763766 | 0.989 | 0.671 | 6.42E-89  | 7    | #N/A     | MGI:3032619  |
| PPDPF    | 6.76E-72  | 1.231577355 | 0.901 | 0.496 | 3.00E-67  | 20   | #N/A     | #N/A         |
| MYL9     | 1.01E-66  | 1.142708652 | 0.847 | 0.348 | 4.51E-62  | 20   | #N/A     | #N/A         |
| TMSB4X   | 1.78E-51  | 1.118016852 | 0.595 | 0.153 | 7.90E-47  | X    | YES      | #N/A         |
| HBA2     | 2.99E-17  | 1.115361017 | 0.107 | 0.009 | 1.33E-12  | 16   | #N/A     | #N/A         |
| CD99     | 2.53E-42  | 1.113285902 | 0.706 | 0.277 | 1.12E-37  | X    | #N/A     | #N/A         |
| PFN1     | 6.90E-63  | 1.112166688 | 0.63  | 0.143 | 3.07E-58  | 17   | #N/A     | #N/A         |
| UQCRQ    | 3.64E-51  | 1.106819589 | 0.779 | 0.338 | 1.62E-46  | 5    | #N/A     | #N/A         |
| RPS29    | 7.93E-95  | 1.099929341 | 0.985 | 0.804 | 3.52E-90  | 14   | #N/A     | #N/A         |
| RPL38    | 1.22E-90  | 1.08572825  | 0.973 | 0.752 | 5.44E-86  | 17   | #N/A     | MGI:1861228  |
| SLC25A6  | 1.60E-60  | 1.069852721 | 0.771 | 0.27  | 7.10E-56  | X    | #N/A     | #N/A         |
| RPLP2    | 2.43E-86  | 1.065571463 | 0.985 | 0.721 | 1.08E-81  | 11   | #N/A     | #N/A         |
| RPL39    | 2.36E-77  | 1.065287085 | 0.973 | 0.69  | 1.05E-72  | X    | YES      | #N/A         |
| RPS26    | 9.79E-66  | 1.060555127 | 0.92  | 0.562 | 4.35E-61  | 12   | #N/A     | #N/A         |
| NDUFA11  | 6.30E-56  | 1.040904442 | 0.771 | 0.297 | 2.80E-51  | 19   | #N/A     | #N/A         |
| MIR202HG | 1.89E-55  | 1.030651325 | 0.947 | 0.63  | 8.41E-51  | 10   | #N/A     | #N/A         |
| BEX1     | 2.66E-64  | 1.0296462   | 0.935 | 0.54  | 1.18E-59  | X    | YES      | #N/A         |
| EEF1A1   | 5.48E-112 | 1.025445711 | 0.996 | 0.942 | 2.44E-107 | 6    | #N/A     | #N/A         |
| USMG5    | 3.05E-65  | 1.017202599 | 0.916 | 0.543 | 1.35E-60  | 10   | #N/A     | #N/A         |
| G6PD     | 4.45E-48  | 1.01585106  | 0.702 | 0.247 | 1.98E-43  | X    | YES      | #N/A         |
| RPL37    | 1.47E-66  | 1.013673993 | 0.95  | 0.675 | 6.54E-62  | 5    | #N/A     | #N/A         |
| RPS27    | 2.48E-91  | 1.009652287 | 0.985 | 0.882 | 1.10E-86  | 1    | #N/A     | #N/A         |
| SPARC    | 2.77E-27  | 0.982972755 | 0.683 | 0.316 | 1.23E-22  | 5    | #N/A     | #N/A         |
| RPL36    | 2.68E-72  | 0.982124693 | 0.973 | 0.728 | 1.19E-67  | 19   | #N/A     | #N/A         |
| RPL13A   | 3.20E-88  | 0.973554384 | 0.989 | 0.823 | 1.42E-83  | 19   | #N/A     | #N/A         |
| RPL23A   | 1.05E-75  | 0.968389705 | 0.977 | 0.716 | 4.67E-71  | 17   | #N/A     | #N/A         |
| RPL27    | 4.62E-65  | 0.961842698 | 0.939 | 0.583 | 2.06E-60  | 17   | #N/A     | #N/A         |
| PSAP     | 1.25E-33  | 0.961595755 | 0.473 | 0.137 | 5.54E-29  | 10   | #N/A     | MGI:3711720  |
| IGFBP7   | 6.02E-58  | 0.96102484  | 0.561 | 0.108 | 2.68E-53  | 4    | #N/A     | MGI:5618913  |
| GAPDH    | 7.58E-70  | 0.956463643 | 0.958 | 0.754 | 3.37E-65  | 12   | #N/A     | #N/A         |
| RPS28    | 6.01E-70  | 0.942349959 | 0.95  | 0.702 | 2.67E-65  | 19   | #N/A     | #N/A         |
| UQCR11   | 4.19E-45  | 0.941687216 | 0.767 | 0.315 | 1.86E-40  | 19   | #N/A     | #N/A         |
| PHGDH    | 6.66E-50  | 0.941376556 | 0.443 | 0.077 | 2.96E-45  | 1    | #N/A     | #N/A         |
| RPL27A   | 5.15E-72  | 0.934878761 | 0.969 | 0.707 | 2.29E-67  | 11   | #N/A     | #N/A         |
| HNRNPA1  | 4.13E-51  | 0.931929057 | 0.859 | 0.411 | 1.84E-46  | 12   | #N/A     | #N/A         |
| RHOC     | 5.69E-50  | 0.92820538  | 0.718 | 0.241 | 2.53E-45  | 1    | #N/A     | #N/A         |
| B2M      | 3.04E-32  | 0.924334367 | 0.439 | 0.125 | 1.35E-27  | 15   | #N/A     | #N/A         |
| FTH1     | 5.70E-85  | 0.924014117 | 0.996 | 0.866 | 2.53E-80  | 11   | #N/A     | #N/A         |
| TIMP1    | 1.96E-27  | 0.923969914 | 0.683 | 0.332 | 8.73E-23  | X    | YES      | MGI:3512125  |
| RPL37A   | 3.39E-89  | 0.909324885 | 0.996 | 0.895 | 1.51E-84  | 2    | #N/A     | #N/A         |
| GABARAP  | 1.41E-46  | 0.908014053 | 0.588 | 0.161 | 6.27E-42  | 17   | #N/A     | #N/A         |
| HSPB1    | 1.67E-35  | 0.907080995 | 0.462 | 0.126 | 7.44E-31  | 7    | #N/A     | #N/A         |
| SNHG25   | 9.38E-52  | 0.905878951 | 0.347 | 0.038 | 4.17E-47  | 17   | #N/A     | #N/A         |
| RPS10    | 7.82E-62  | 0.90178014  | 0.954 | 0.671 | 3.48E-57  | 6    | #N/A     | #N/A         |
| RPS20    | 1.33E-69  | 0.898300111 | 0.962 | 0.78  | 5.89E-65  | 8    | #N/A     | #N/A         |
| INHA     | 2.22E-32  | 0.896370884 | 0.557 | 0.199 | 9.89E-28  | 2    | #N/A     | MGI:1857202  |
| AKR1B1   | 1.22E-41  | 0.895356794 | 0.55  | 0.157 | 5.41E-37  | 7    | #N/A     | #N/A         |
| PGAM1    | 1.66E-41  | 0.894123094 | 0.706 | 0.285 | 7.36E-37  | 10   | #N/A     | #N/A         |
| NUTF2    | 9.83E-41  | 0.887659349 | 0.565 | 0.17  | 4.37E-36  | 16   | #N/A     | #N/A         |
| RPL12    | 1.27E-48  | 0.887634262 | 0.866 | 0.446 | 5.66E-44  | 9    | #N/A     | #N/A         |
| RPL4     | 1.01E-44  | 0.884582296 | 0.809 | 0.361 | 4.50E-40  | 15   | #N/A     | #N/A         |
| RPL34    | 2.79E-64  | 0.881998434 | 0.977 | 0.707 | 1.24E-59  | 4    | #N/A     | #N/A         |
| OST4     | 1.53E-47  | 0.881301797 | 0.851 | 0.414 | 6.79E-43  | 2    | #N/A     | #N/A         |
| CLU      | 2.18E-20  | 0.878667873 | 0.927 | 0.641 | 9.68E-16  | 8    | #N/A     | #N/A         |
| MT1X     | 1.79E-35  | 0.877204562 | 0.508 | 0.15  | 7.94E-31  | 16   | #N/A     | MGI:1857301  |
| TUBA1A   | 3.68E-43  | 0.872613757 | 0.832 | 0.378 | 1.64E-38  | 12   | #N/A     | #N/A         |
| COX7C    | 7.42E-52  | 0.869595504 | 0.92  | 0.616 | 3.30E-47  | 5    | #N/A     | #N/A         |
| RPS19    | 2.20E-62  | 0.867005844 | 0.977 | 0.722 | 9.78E-58  | 19   | #N/A     | #N/A         |
| MT2A     | 1.01E-28  | 0.863732426 | 0.469 | 0.148 | 4.48E-24  | 16   | #N/A     | #N/A         |
| ATP5G2   | 1.24E-41  | 0.861054998 | 0.821 | 0.421 | 5.53E-37  | 12   | #N/A     | #N/A         |
| RPL23    | 8.25E-49  | 0.857665476 | 0.905 | 0.553 | 3.67E-44  | 17   | #N/A     | #N/A         |
| RPLP1    | 7.11E-91  | 0.855417297 | 1     | 0.927 | 3.16E-86  | 15   | #N/A     | MGI:6094829  |
| COX8A    | 3.04E-42  | 0.852817531 | 0.802 | 0.395 | 1.35E-37  | 11   | #N/A     | #N/A         |
| NDUFA1   | 2.13E-36  | 0.850860912 | 0.725 | 0.315 | 9.47E-32  | X    | YES      | #N/A         |
| TOMM7    | 3.08E-47  | 0.849277105 | 0.878 | 0.493 | 1.37E-42  | 7    | #N/A     | #N/A         |
| PPIA     | 3.10E-45  | 0.84611697  | 0.851 | 0.455 | 1.38E-40  | 7    | #N/A     | #N/A         |
| RPL18A   | 8.06E-65  | 0.83804246  | 0.977 | 0.695 | 3.58E-60  | 19   | #N/A     | #N/A         |

|          |          |             |       |       |          |    |      |             |
|----------|----------|-------------|-------|-------|----------|----|------|-------------|
| RPLP0    | 1.20E-50 | 0.835347202 | 0.916 | 0.585 | 5.33E-46 | 12 | #N/A | #N/A        |
| RPL21    | 3.73E-64 | 0.832620584 | 0.966 | 0.748 | 1.66E-59 | 13 | #N/A | #N/A        |
| SERPINA5 | 1.12E-24 | 0.831506491 | 0.733 | 0.383 | 5.00E-20 | 14 | #N/A | MGI:2445835 |
| NDUFS5   | 2.59E-37 | 0.827473661 | 0.786 | 0.387 | 1.15E-32 | 1  | #N/A | #N/A        |
| MYL6B    | 2.28E-45 | 0.823231169 | 0.924 | 0.702 | 1.02E-40 | 12 | #N/A | #N/A        |
| RPL28    | 3.52E-66 | 0.82058653  | 0.973 | 0.829 | 1.56E-61 | 19 | #N/A | #N/A        |
| IFITM2   | 1.18E-31 | 0.818917875 | 0.55  | 0.197 | 5.23E-27 | 11 | #N/A | #N/A        |
| S100A10  | 4.47E-45 | 0.818800032 | 0.893 | 0.582 | 1.99E-40 | 1  | #N/A | #N/A        |
| CFL1     | 6.81E-42 | 0.81707866  | 0.859 | 0.475 | 3.03E-37 | 11 | #N/A | #N/A        |
| RPS8     | 3.59E-52 | 0.8049048   | 0.935 | 0.681 | 1.60E-47 | 1  | #N/A | #N/A        |
| POLR2L   | 2.98E-34 | 0.802092589 | 0.737 | 0.35  | 1.32E-29 | 11 | #N/A | #N/A        |
| NDUFB1   | 4.47E-29 | 0.801335192 | 0.653 | 0.305 | 1.99E-24 | 14 | #N/A | #N/A        |
| DEFB119  | 2.83E-48 | 0.801312755 | 0.901 | 0.781 | 1.26E-43 | 20 | #N/A | #N/A        |
| RPS16    | 3.68E-52 | 0.801076893 | 0.958 | 0.668 | 1.64E-47 | 19 | #N/A | #N/A        |
| ATP5I    | 1.36E-35 | 0.799945423 | 0.771 | 0.381 | 6.04E-31 | 4  | #N/A | #N/A        |
| DLK1     | 2.46E-54 | 0.798389676 | 0.263 | 0.009 | 1.09E-49 | 14 | #N/A | MGI:3640339 |
| JUNB     | 6.36E-27 | 0.795814838 | 0.466 | 0.15  | 2.83E-22 | 19 | #N/A | #N/A        |
| DCN      | 3.47E-38 | 0.792318547 | 0.275 | 0.031 | 1.54E-33 | 12 | #N/A | MGI:2153002 |
| SERPINF1 | 7.79E-21 | 0.791202661 | 0.637 | 0.311 | 3.46E-16 | 17 | #N/A | MGI:2664515 |
| GSTA2    | 8.90E-28 | 0.789540446 | 0.641 | 0.303 | 3.95E-23 | 6  | #N/A | #N/A        |
| VDAC1    | 1.05E-35 | 0.781753361 | 0.618 | 0.215 | 4.68E-31 | 5  | #N/A | #N/A        |
| UQCRH    | 6.81E-32 | 0.777125988 | 0.767 | 0.389 | 3.03E-27 | 1  | #N/A | #N/A        |
| GSTA4    | 9.85E-34 | 0.77617235  | 0.508 | 0.152 | 4.38E-29 | 6  | #N/A | #N/A        |
| TRAPPC1  | 1.08E-30 | 0.77572979  | 0.599 | 0.234 | 4.79E-26 | 17 | #N/A | #N/A        |
| CSTB     | 1.82E-34 | 0.774741839 | 0.756 | 0.347 | 8.09E-30 | 21 | #N/A | #N/A        |
| TMSB10   | 4.22E-60 | 0.774197798 | 0.992 | 0.925 | 1.88E-55 | 2  | #N/A | #N/A        |
| RPSA     | 5.19E-42 | 0.773863984 | 0.836 | 0.402 | 2.31E-37 | 3  | #N/A | #N/A        |
| ALDOA    | 7.49E-35 | 0.771407593 | 0.664 | 0.26  | 3.33E-30 | 16 | #N/A | #N/A        |
| SNRPB    | 9.25E-34 | 0.770494688 | 0.569 | 0.201 | 4.11E-29 | 20 | #N/A | #N/A        |
| ACOT2    | 4.65E-40 | 0.758412902 | 0.328 | 0.049 | 2.07E-35 | 14 | #N/A | #N/A        |
| RPL6     | 1.49E-43 | 0.75714974  | 0.908 | 0.577 | 6.64E-39 | 12 | #N/A | #N/A        |
| FGFBP2   | 1.94E-50 | 0.754749278 | 0.26  | 0.012 | 8.61E-46 | 4  | #N/A | #N/A        |
| TXN2     | 3.45E-34 | 0.754102518 | 0.573 | 0.193 | 1.53E-29 | 22 | #N/A | #N/A        |
| ATP5E    | 6.37E-45 | 0.752647385 | 0.931 | 0.64  | 2.83E-40 | 20 | #N/A | #N/A        |
| MT1E     | 2.88E-29 | 0.751890533 | 0.237 | 0.034 | 1.28E-24 | 16 | #N/A | #N/A        |
| SMIM1    | 1.47E-34 | 0.75172365  | 0.782 | 0.386 | 6.55E-30 | 1  | #N/A | #N/A        |
| PCBP2    | 1.64E-34 | 0.751464582 | 0.63  | 0.233 | 7.28E-30 | 12 | #N/A | #N/A        |
| HIGD2A   | 2.76E-33 | 0.74966735  | 0.649 | 0.252 | 1.23E-28 | 5  | #N/A | #N/A        |
| PPP2R1A  | 3.62E-32 | 0.749391662 | 0.454 | 0.132 | 1.61E-27 | 19 | #N/A | #N/A        |
| KRTCAP2  | 2.40E-31 | 0.748823718 | 0.527 | 0.173 | 1.07E-26 | 1  | #N/A | #N/A        |
| COMMD6   | 2.05E-30 | 0.744867987 | 0.748 | 0.382 | 9.12E-26 | 13 | #N/A | #N/A        |
| ECH1     | 9.18E-29 | 0.742756683 | 0.702 | 0.335 | 4.08E-24 | 19 | #N/A | #N/A        |
| RPS25    | 1.72E-44 | 0.741829098 | 0.927 | 0.648 | 7.66E-40 | 11 | #N/A | #N/A        |
| RPS15A   | 1.60E-44 | 0.741196707 | 0.939 | 0.709 | 7.13E-40 | 16 | #N/A | #N/A        |
| IFITM3   | 7.96E-39 | 0.741082645 | 0.889 | 0.524 | 3.54E-34 | 11 | #N/A | #N/A        |
| MYL6     | 1.85E-52 | 0.740981273 | 0.969 | 0.741 | 8.20E-48 | 12 | #N/A | #N/A        |
| ENO1     | 6.13E-32 | 0.740065683 | 0.702 | 0.296 | 2.72E-27 | 1  | #N/A | #N/A        |
| ATP5C1   | 2.95E-31 | 0.739642839 | 0.744 | 0.362 | 1.31E-26 | 10 | #N/A | #N/A        |
| TFF3     | 1.00E-31 | 0.737294909 | 0.202 | 0.018 | 4.46E-27 | 21 | #N/A | #N/A        |
| RPS3     | 7.75E-61 | 0.735583603 | 0.977 | 0.824 | 3.44E-56 | 11 | #N/A | #N/A        |
| IL32     | 2.85E-26 | 0.734359904 | 0.156 | 0.012 | 1.27E-21 | 16 | #N/A | #N/A        |
| IFI27    | 2.99E-24 | 0.734239601 | 0.718 | 0.379 | 1.33E-19 | 14 | #N/A | #N/A        |
| AMH      | 2.02E-17 | 0.731951174 | 0.202 | 0.048 | 9.00E-13 | 19 | #N/A | MGI:1857126 |
| HNRNPA0  | 1.52E-34 | 0.731180035 | 0.485 | 0.137 | 6.74E-30 | 5  | #N/A | #N/A        |
| TMEM14C  | 7.15E-31 | 0.730041754 | 0.531 | 0.182 | 3.18E-26 | 6  | #N/A | #N/A        |
| S100A11  | 8.51E-28 | 0.729189565 | 0.725 | 0.366 | 3.78E-23 | 1  | #N/A | MGI:2681771 |
| VIM      | 2.61E-40 | 0.728523027 | 0.943 | 0.586 | 1.16E-35 | 10 | #N/A | #N/A        |
| ARF5     | 6.44E-30 | 0.72526148  | 0.401 | 0.106 | 2.86E-25 | 7  | #N/A | #N/A        |
| RPS27A   | 8.78E-51 | 0.724678728 | 0.962 | 0.77  | 3.90E-46 | 2  | #N/A | #N/A        |
| RPL10A   | 1.65E-39 | 0.718300982 | 0.901 | 0.567 | 7.31E-35 | 6  | #N/A | #N/A        |
| GSN      | 4.46E-37 | 0.714888846 | 0.374 | 0.074 | 1.98E-32 | 9  | #N/A | MGI:2179509 |
| BANF1    | 8.83E-34 | 0.711429244 | 0.576 | 0.197 | 3.92E-29 | 11 | #N/A | #N/A        |
| COX6A1   | 4.08E-28 | 0.710731329 | 0.756 | 0.398 | 1.82E-23 | 12 | #N/A | #N/A        |
| JUN      | 1.51E-22 | 0.70654198  | 0.431 | 0.146 | 6.70E-18 | 1  | #N/A | #N/A        |
| ATOX1    | 1.58E-25 | 0.706285214 | 0.634 | 0.287 | 7.01E-21 | 5  | #N/A | #N/A        |
| FOS      | 6.10E-29 | 0.703190007 | 0.527 | 0.167 | 2.71E-24 | 14 | #N/A | MGI:1857171 |
| SMIM4    | 3.64E-32 | 0.701459703 | 0.397 | 0.099 | 1.62E-27 | 3  | #N/A | #N/A        |
| TIMM8B   | 5.12E-26 | 0.701091033 | 0.676 | 0.331 | 2.28E-21 | 11 | #N/A | #N/A        |
| PSMA2    | 9.00E-31 | 0.699079752 | 0.622 | 0.241 | 4.00E-26 | 7  | #N/A | #N/A        |
| ANXA2    | 3.28E-27 | 0.696587716 | 0.618 | 0.266 | 1.46E-22 | 15 | #N/A | #N/A        |
| TRMT112  | 3.06E-27 | 0.696375633 | 0.729 | 0.372 | 1.36E-22 | 11 | #N/A | #N/A        |
| TUBB     | 1.85E-25 | 0.694913643 | 0.645 | 0.293 | 8.21E-21 | 6  | #N/A | #N/A        |
| TAGLN2   | 5.12E-30 | 0.694208205 | 0.782 | 0.402 | 2.28E-25 | 1  | #N/A | #N/A        |
| TMEM258  | 3.26E-28 | 0.693909416 | 0.641 | 0.272 | 1.45E-23 | 11 | #N/A | #N/A        |
| TPT1     | 4.14E-61 | 0.691959528 | 0.981 | 0.879 | 1.84E-56 | 13 | #N/A | #N/A        |

|         |          |             |       |       |          |    |      |             |
|---------|----------|-------------|-------|-------|----------|----|------|-------------|
| GAMT    | 1.81E-25 | 0.691239683 | 0.718 | 0.372 | 8.04E-21 | 19 | #N/A | MGI:3044282 |
| RPL35A  | 6.06E-52 | 0.688752244 | 0.962 | 0.788 | 2.69E-47 | 3  | #N/A | #N/A        |
| RPL10   | 3.50E-39 | 0.688238186 | 0.943 | 0.691 | 1.56E-34 | X  | YES  | #N/A        |
| RPS23   | 3.74E-45 | 0.686944803 | 0.954 | 0.757 | 1.66E-40 | 5  | #N/A | #N/A        |
| DEFB123 | 1.75E-22 | 0.684021175 | 0.752 | 0.487 | 7.79E-18 | 20 | #N/A | #N/A        |
| CYP11A1 | 1.20E-30 | 0.681099943 | 0.332 | 0.071 | 5.32E-26 | 15 | #N/A | MGI:2183813 |
| ROMO1   | 2.22E-27 | 0.679173491 | 0.626 | 0.269 | 9.85E-23 | 20 | #N/A | #N/A        |
| CALM2   | 3.19E-43 | 0.678756877 | 0.947 | 0.732 | 1.42E-38 | 2  | #N/A | #N/A        |
| SCP2    | 2.39E-26 | 0.678362938 | 0.641 | 0.287 | 1.06E-21 | 1  | #N/A | #N/A        |
| NDUFA4  | 1.02E-34 | 0.67566102  | 0.901 | 0.59  | 4.52E-30 | 7  | #N/A | #N/A        |
| GSTM4   | 2.21E-33 | 0.674629819 | 0.309 | 0.054 | 9.84E-29 | 1  | #N/A | #N/A        |
| UBL5    | 5.71E-30 | 0.67115016  | 0.84  | 0.535 | 2.54E-25 | 19 | #N/A | #N/A        |
| SH3BGR1 | 7.03E-26 | 0.670893278 | 0.641 | 0.287 | 3.12E-21 | X  | #N/A | #N/A        |
| RPS18   | 4.88E-57 | 0.669822472 | 0.992 | 0.895 | 2.17E-52 | 6  | #N/A | #N/A        |
| TMEM52  | 3.78E-21 | 0.669507664 | 0.366 | 0.121 | 1.68E-16 | 1  | #N/A | #N/A        |
| RPS4Y1  | 3.69E-25 | 0.6657033   | 0.725 | 0.386 | 1.64E-20 | Y  | #N/A | #N/A        |
| MRPS6   | 1.34E-24 | 0.664368417 | 0.637 | 0.296 | 5.97E-20 | 21 | #N/A | #N/A        |
| RBM3    | 2.12E-26 | 0.664140478 | 0.515 | 0.187 | 9.42E-22 | X  | YES  | #N/A        |
| HIGD1A  | 2.02E-28 | 0.664016877 | 0.435 | 0.129 | 8.97E-24 | 3  | #N/A | #N/A        |
| TPI1    | 6.82E-27 | 0.663744231 | 0.79  | 0.453 | 3.03E-22 | 12 | #N/A | #N/A        |
| VAMP2   | 2.36E-28 | 0.66110497  | 0.511 | 0.174 | 1.05E-23 | 17 | #N/A | #N/A        |
| RPL26   | 1.36E-40 | 0.658048211 | 0.958 | 0.754 | 6.03E-36 | 17 | #N/A | #N/A        |
| RPS4X   | 2.24E-47 | 0.657160321 | 0.973 | 0.808 | 9.94E-43 | X  | #N/A | #N/A        |
| SRP9    | 1.36E-28 | 0.656856801 | 0.641 | 0.266 | 6.03E-24 | 1  | #N/A | #N/A        |
| RBP1    | 1.36E-27 | 0.651569097 | 0.752 | 0.382 | 6.05E-23 | 3  | #N/A | MGI:2181412 |
| PET100  | 1.53E-24 | 0.651389048 | 0.462 | 0.164 | 6.80E-20 | 19 | #N/A | #N/A        |
| COX6C   | 1.41E-29 | 0.649766284 | 0.851 | 0.589 | 6.28E-25 | 8  | #N/A | #N/A        |
| ISYNA1  | 1.96E-27 | 0.649513261 | 0.847 | 0.513 | 8.72E-23 | 19 | #N/A | #N/A        |
| IFI27L2 | 1.78E-23 | 0.64813044  | 0.542 | 0.225 | 7.92E-19 | 14 | #N/A | #N/A        |
| DYNLRB1 | 1.21E-24 | 0.647366693 | 0.504 | 0.19  | 5.38E-20 | 20 | #N/A | #N/A        |
| CIRBP   | 4.99E-25 | 0.647243509 | 0.718 | 0.352 | 2.22E-20 | 19 | #N/A | MGI:5432527 |
| TUBA1B  | 5.71E-28 | 0.645771211 | 0.885 | 0.572 | 2.54E-23 | 12 | #N/A | #N/A        |
| UXT     | 1.20E-24 | 0.645173251 | 0.401 | 0.125 | 5.32E-20 | X  | YES  | MGI:6159372 |
| EGR1    | 3.56E-05 | 0.643507322 | 0.198 | 0.104 | 1        | 5  | #N/A | MGI:5766183 |
| SF3A2   | 1.42E-32 | 0.64318846  | 0.256 | 0.036 | 6.32E-28 | 19 | #N/A | #N/A        |
| TMA7    | 3.12E-32 | 0.641120824 | 0.882 | 0.631 | 1.39E-27 | 3  | #N/A | #N/A        |
| SLC25A5 | 1.32E-25 | 0.640143432 | 0.656 | 0.291 | 5.85E-21 | X  | YES  | #N/A        |
| SERF2   | 5.25E-35 | 0.6399982   | 0.931 | 0.669 | 2.33E-30 | 15 | #N/A | #N/A        |
| ZFP36   | 3.74E-18 | 0.63825895  | 0.271 | 0.078 | 1.66E-13 | 19 | #N/A | #N/A        |
| SRI     | 7.92E-23 | 0.637921488 | 0.485 | 0.188 | 3.52E-18 | 7  | #N/A | #N/A        |
| ETFA    | 3.10E-29 | 0.635707144 | 0.439 | 0.129 | 1.38E-24 | 15 | #N/A | #N/A        |
| SNHG19  | 1.04E-27 | 0.634026356 | 0.366 | 0.093 | 4.61E-23 | 16 | #N/A | #N/A        |
| ZFAS1   | 6.36E-26 | 0.634009392 | 0.504 | 0.185 | 2.83E-21 | 20 | #N/A | #N/A        |
| RPL5    | 9.26E-40 | 0.632022529 | 0.95  | 0.716 | 4.12E-35 | 1  | #N/A | #N/A        |
| MTHFS   | 5.33E-28 | 0.629499428 | 0.439 | 0.132 | 2.37E-23 | 15 | #N/A | #N/A        |
| RPL7    | 3.70E-32 | 0.629479092 | 0.885 | 0.629 | 1.64E-27 | 8  | #N/A | #N/A        |
| CNIH1   | 1.39E-22 | 0.628330707 | 0.355 | 0.108 | 6.20E-18 | 14 | #N/A | #N/A        |
| TAX1BP3 | 3.24E-24 | 0.626665291 | 0.359 | 0.102 | 1.44E-19 | 17 | #N/A | #N/A        |
| EMP3    | 2.06E-24 | 0.623374215 | 0.282 | 0.063 | 9.18E-20 | 19 | #N/A | #N/A        |
| FATE1   | 2.74E-38 | 0.621953552 | 0.981 | 0.793 | 1.22E-33 | X  | YES  | #N/A        |
| RPL9    | 1.06E-40 | 0.619131687 | 0.954 | 0.783 | 4.70E-36 | 4  | #N/A | #N/A        |
| NDUFB9  | 4.64E-25 | 0.617780468 | 0.771 | 0.464 | 2.06E-20 | 8  | #N/A | #N/A        |
| MYL12A  | 7.90E-23 | 0.617025951 | 0.683 | 0.335 | 3.51E-18 | 18 | #N/A | #N/A        |
| ARL6IP1 | 8.13E-22 | 0.616411532 | 0.595 | 0.272 | 3.61E-17 | 16 | #N/A | #N/A        |
| MRPL33  | 3.24E-21 | 0.613762422 | 0.641 | 0.319 | 1.44E-16 | 2  | #N/A | #N/A        |
| PRDX1   | 5.47E-23 | 0.612783365 | 0.779 | 0.46  | 2.43E-18 | 1  | #N/A | #N/A        |
| TSEN34  | 4.66E-27 | 0.61054319  | 0.607 | 0.234 | 2.07E-22 | 19 | #N/A | #N/A        |
| SNRPN   | 7.28E-23 | 0.608580143 | 0.523 | 0.213 | 3.24E-18 | 15 | #N/A | #N/A        |
| TIMM13  | 5.60E-24 | 0.608358075 | 0.515 | 0.197 | 2.49E-19 | 19 | #N/A | MGI:6257582 |
| FXVD6   | 1.71E-20 | 0.608320953 | 0.45  | 0.175 | 7.61E-16 | 11 | #N/A | #N/A        |
| CLDN11  | 6.45E-16 | 0.608011183 | 0.588 | 0.307 | 2.87E-11 | 3  | #N/A | MA          |
| YWHAE   | 1.11E-22 | 0.607256289 | 0.664 | 0.324 | 4.93E-18 | 17 | #N/A | MGI:2667341 |
| GSTA1   | 3.34E-35 | 0.607234638 | 0.927 | 0.686 | 1.49E-30 | 6  | #N/A | #N/A        |
| PRPS2   | 4.04E-22 | 0.606298607 | 0.565 | 0.25  | 1.80E-17 | X  | YES  | #N/A        |
| RPL14   | 6.09E-23 | 0.606004117 | 0.798 | 0.492 | 2.71E-18 | 3  | #N/A | #N/A        |
| TAF11   | 1.08E-18 | 0.605355382 | 0.401 | 0.157 | 4.80E-14 | 6  | #N/A | #N/A        |
| CTSV    | 1.31E-14 | 0.605349141 | 0.37  | 0.157 | 5.81E-10 | 9  | #N/A | #N/A        |
| ATP5B   | 9.16E-22 | 0.6035281   | 0.748 | 0.412 | 4.07E-17 | 12 | #N/A | #N/A        |
| RPS12   | 1.10E-44 | 0.600956898 | 0.973 | 0.825 | 4.87E-40 | 6  | #N/A | #N/A        |
| ATP5J2  | 1.19E-22 | 0.600920794 | 0.733 | 0.423 | 5.27E-18 | 7  | #N/A | #N/A        |
| SNRPE   | 1.23E-23 | 0.600345328 | 0.546 | 0.219 | 5.49E-19 | 1  | #N/A | #N/A        |
| SEC61G  | 3.73E-26 | 0.599208936 | 0.76  | 0.379 | 1.66E-21 | 7  | #N/A | #N/A        |
| RPS13   | 1.84E-36 | 0.598759019 | 0.962 | 0.753 | 8.20E-32 | 11 | #N/A | #N/A        |
| DYNLT1  | 1.66E-22 | 0.597722319 | 0.805 | 0.502 | 7.40E-18 | 6  | #N/A | #N/A        |
| COX5B   | 3.28E-28 | 0.595719214 | 0.855 | 0.557 | 1.46E-23 | 2  | #N/A | #N/A        |

|          |          |             |       |       |          |    |      |             |
|----------|----------|-------------|-------|-------|----------|----|------|-------------|
| MRPL16   | 4.85E-24 | 0.595287429 | 0.534 | 0.211 | 2.16E-19 | 11 | #N/A | #N/A        |
| RPS15    | 3.86E-38 | 0.595198729 | 0.954 | 0.785 | 1.72E-33 | 19 | #N/A | #N/A        |
| PKM      | 7.46E-23 | 0.594860284 | 0.79  | 0.446 | 3.32E-18 | 15 | #N/A | #N/A        |
| COX7B    | 3.05E-22 | 0.594749846 | 0.565 | 0.246 | 1.36E-17 | X  | YES  | #N/A        |
| COX17    | 3.56E-19 | 0.594648909 | 0.504 | 0.221 | 1.58E-14 | 3  | #N/A | #N/A        |
| CHPF     | 2.49E-18 | 0.592661845 | 0.332 | 0.114 | 1.11E-13 | 2  | #N/A | #N/A        |
| APP      | 2.46E-12 | 0.592444217 | 0.275 | 0.106 | 1.09E-07 | 21 | #N/A | MGI:2136847 |
| GLO1     | 2.36E-24 | 0.591323016 | 0.427 | 0.139 | 1.05E-19 | 6  | #N/A | #N/A        |
| RPS5     | 1.88E-25 | 0.590502151 | 0.866 | 0.618 | 8.34E-21 | 19 | #N/A | #N/A        |
| SNHG8    | 6.90E-25 | 0.589998405 | 0.718 | 0.355 | 3.07E-20 | 4  | #N/A | #N/A        |
| CLIC1    | 1.25E-18 | 0.586147153 | 0.317 | 0.102 | 5.56E-14 | 6  | #N/A | #N/A        |
| LGALS1   | 1.87E-26 | 0.584342015 | 0.912 | 0.661 | 8.33E-22 | 22 | #N/A | #N/A        |
| SMIM10   | 6.31E-20 | 0.582262479 | 0.607 | 0.296 | 2.81E-15 | X  | YES  | #N/A        |
| PRAF2    | 1.26E-22 | 0.580754766 | 0.282 | 0.07  | 5.61E-18 | X  | YES  | #N/A        |
| CD151    | 8.72E-15 | 0.580502973 | 0.279 | 0.098 | 3.87E-10 | 11 | #N/A | #N/A        |
| PLP2     | 6.70E-23 | 0.580395525 | 0.263 | 0.061 | 2.98E-18 | X  | YES  | #N/A        |
| ABRACL   | 3.56E-19 | 0.580096773 | 0.615 | 0.308 | 1.58E-14 | 6  | #N/A | #N/A        |
| MTCH1    | 2.04E-21 | 0.579385551 | 0.576 | 0.256 | 9.06E-17 | 6  | #N/A | #N/A        |
| PSMA1    | 1.04E-19 | 0.578233645 | 0.435 | 0.168 | 4.61E-15 | 11 | #N/A | #N/A        |
| ATP5A1   | 8.27E-20 | 0.577862029 | 0.71  | 0.384 | 3.68E-15 | 18 | #N/A | #N/A        |
| NUDT10   | 7.49E-24 | 0.577627972 | 0.397 | 0.123 | 3.33E-19 | X  | YES  | #N/A        |
| ZYX      | 1.68E-19 | 0.576048345 | 0.374 | 0.135 | 7.46E-15 | 7  | #N/A | #N/A        |
| S100A16  | 2.66E-24 | 0.575746684 | 0.649 | 0.295 | 1.18E-19 | 1  | #N/A | #N/A        |
| COL1A2   | 1.47E-13 | 0.574875456 | 0.366 | 0.156 | 6.56E-09 | 7  | #N/A | #N/A        |
| POLR2G   | 2.07E-21 | 0.574150562 | 0.393 | 0.131 | 9.22E-17 | 11 | #N/A | #N/A        |
| CYB5R3   | 8.63E-22 | 0.574097198 | 0.569 | 0.25  | 3.84E-17 | 22 | #N/A | #N/A        |
| HIST1H1C | 7.75E-12 | 0.574092583 | 0.317 | 0.137 | 3.45E-07 | 6  | #N/A | #N/A        |
| STAR     | 2.30E-23 | 0.57320758  | 0.5   | 0.187 | 1.02E-18 | 8  | #N/A | MGI:2388706 |
| CRYAB    | 2.72E-29 | 0.57216516  | 0.168 | 0.011 | 1.21E-24 | 11 | #N/A | #N/A        |
| BTF3     | 3.12E-22 | 0.572049289 | 0.794 | 0.447 | 1.39E-17 | 5  | #N/A | MGI:3688730 |
| BSG      | 3.46E-15 | 0.571977573 | 0.527 | 0.267 | 1.54E-10 | 19 | #N/A | MA          |
| TOMM34   | 7.65E-24 | 0.571812698 | 0.439 | 0.148 | 3.40E-19 | 20 | #N/A | #N/A        |
| TRIM55   | 4.15E-23 | 0.56966156  | 0.351 | 0.102 | 1.84E-18 | 8  | #N/A | #N/A        |
| DPM3     | 6.11E-24 | 0.56777086  | 0.385 | 0.119 | 2.72E-19 | 1  | #N/A | MGI:5548565 |
| ACTG1    | 3.12E-16 | 0.567262756 | 0.656 | 0.357 | 1.39E-11 | 17 | #N/A | #N/A        |
| NDUFB11  | 2.10E-25 | 0.566330458 | 0.683 | 0.312 | 9.35E-21 | X  | YES  | #N/A        |
| PPIB     | 1.46E-16 | 0.565886333 | 0.447 | 0.196 | 6.49E-12 | 15 | #N/A | #N/A        |
| RPL22    | 4.05E-28 | 0.565658235 | 0.897 | 0.611 | 1.80E-23 | 1  | #N/A | #N/A        |
| RAB7A    | 7.87E-19 | 0.565522469 | 0.405 | 0.154 | 3.50E-14 | 3  | #N/A | #N/A        |
| FAU      | 4.19E-34 | 0.564958802 | 0.947 | 0.758 | 1.86E-29 | 11 | #N/A | #N/A        |
| ATP6V1E1 | 5.47E-24 | 0.564901651 | 0.492 | 0.184 | 2.43E-19 | 22 | #N/A | #N/A        |
| CAPZA2   | 5.56E-24 | 0.564011666 | 0.473 | 0.169 | 2.47E-19 | 7  | #N/A | #N/A        |
| BAX      | 4.31E-20 | 0.562528673 | 0.294 | 0.082 | 1.92E-15 | 19 | #N/A | MA          |
| EIF4A1   | 2.36E-22 | 0.562368624 | 0.534 | 0.211 | 1.05E-17 | 17 | #N/A | #N/A        |
| EMC10    | 1.03E-17 | 0.560302759 | 0.321 | 0.11  | 4.56E-13 | 19 | #N/A | MGI:5085894 |
| NOP10    | 3.36E-22 | 0.558746377 | 0.565 | 0.241 | 1.49E-17 | 15 | #N/A | #N/A        |
| C4orf48  | 1.02E-19 | 0.558308449 | 0.737 | 0.43  | 4.52E-15 | 4  | #N/A | #N/A        |
| RPS3A    | 6.50E-40 | 0.556770738 | 0.977 | 0.83  | 2.89E-35 | 4  | #N/A | #N/A        |
| CDKN1A   | 2.34E-19 | 0.555048214 | 0.298 | 0.089 | 1.04E-14 | 6  | #N/A | MGI:5695874 |
| RPL35    | 5.54E-33 | 0.554946933 | 0.931 | 0.766 | 2.46E-28 | 9  | #N/A | #N/A        |
| DUSP1    | 1.80E-13 | 0.554888152 | 0.256 | 0.089 | 7.99E-09 | 5  | #N/A | #N/A        |
| SNCG     | 5.69E-25 | 0.553699731 | 0.13  | 0.007 | 2.53E-20 | 10 | #N/A | #N/A        |
| FKBP1A   | 2.78E-26 | 0.553685262 | 0.45  | 0.142 | 1.24E-21 | 20 | #N/A | #N/A        |
| EPHX1    | 2.26E-19 | 0.553142896 | 0.233 | 0.056 | 1.01E-14 | 1  | #N/A | #N/A        |
| SNRPG    | 2.84E-22 | 0.552485194 | 0.603 | 0.286 | 1.26E-17 | 2  | #N/A | #N/A        |
| SLC25A3  | 1.04E-21 | 0.551978274 | 0.63  | 0.29  | 4.63E-17 | 12 | #N/A | MGI:5548483 |
| ITM2B    | 1.57E-18 | 0.550796851 | 0.618 | 0.294 | 6.99E-14 | 13 | #N/A | #N/A        |
| NME1     | 4.18E-19 | 0.54967977  | 0.363 | 0.125 | 1.86E-14 | 17 | #N/A | #N/A        |
| C4orf3   | 1.18E-16 | 0.549257595 | 0.519 | 0.25  | 5.25E-12 | 4  | #N/A | #N/A        |
| TOMM5    | 2.87E-23 | 0.548421329 | 0.378 | 0.114 | 1.27E-18 | 9  | #N/A | #N/A        |
| PRNP     | 4.77E-15 | 0.54777109  | 0.298 | 0.107 | 2.12E-10 | 20 | #N/A | #N/A        |
| TSPO     | 1.06E-18 | 0.546860069 | 0.34  | 0.113 | 4.72E-14 | 22 | #N/A | #N/A        |
| EID1     | 1.65E-19 | 0.546846155 | 0.771 | 0.443 | 7.34E-15 | 15 | #N/A | #N/A        |
| CYB5A    | 1.78E-20 | 0.545738471 | 0.649 | 0.318 | 7.92E-16 | 18 | #N/A | #N/A        |
| NDUFS4   | 2.18E-20 | 0.544591439 | 0.504 | 0.207 | 9.69E-16 | 5  | #N/A | #N/A        |
| ATP5D    | 2.18E-18 | 0.543944125 | 0.679 | 0.365 | 9.69E-14 | 19 | #N/A | #N/A        |
| PSAT1    | 9.06E-24 | 0.542613182 | 0.302 | 0.074 | 4.03E-19 | 9  | #N/A | #N/A        |
| CST3     | 2.17E-17 | 0.542467667 | 0.897 | 0.654 | 9.66E-13 | 20 | #N/A | MGI:5586715 |
| AP2M1    | 1.66E-18 | 0.542403135 | 0.584 | 0.282 | 7.38E-14 | 3  | #N/A | #N/A        |
| ANAPC16  | 2.08E-19 | 0.541920078 | 0.569 | 0.262 | 9.23E-15 | 10 | #N/A | #N/A        |
| NAPA     | 1.01E-21 | 0.541878309 | 0.412 | 0.144 | 4.47E-17 | 19 | #N/A | #N/A        |
| C7orf50  | 9.38E-20 | 0.541546252 | 0.462 | 0.185 | 4.17E-15 | 7  | #N/A | #N/A        |
| BLOC1S1  | 1.23E-21 | 0.541121703 | 0.492 | 0.189 | 5.45E-17 | 12 | #N/A | #N/A        |
| RAC1     | 7.41E-20 | 0.54084215  | 0.546 | 0.242 | 3.30E-15 | 7  | #N/A | #N/A        |
| CITED2   | 4.02E-25 | 0.539810879 | 0.286 | 0.063 | 1.79E-20 | 6  | #N/A | #N/A        |

|           |             |              |       |       |             |    |      |             |
|-----------|-------------|--------------|-------|-------|-------------|----|------|-------------|
| FSCN1     | 2.09E-21    | 0.537288583  | 0.439 | 0.16  | 9.30E-17    | 7  | #N/A | #N/A        |
| PFN2      | 1.44E-23    | 0.536303286  | 0.298 | 0.073 | 6.39E-19    | 3  | #N/A | #N/A        |
| RPL18     | 2.46E-35    | 0.536244611  | 0.969 | 0.791 | 1.10E-30    | 19 | #N/A | #N/A        |
| POLE4     | 1.36E-16    | 0.535479772  | 0.439 | 0.188 | 6.04E-12    | 2  | #N/A | MGI:5085645 |
| RPL29     | 1.82E-27    | 0.534708015  | 0.927 | 0.739 | 8.09E-23    | 3  | #N/A | MGI:3696667 |
| RBBP7     | 6.95E-21    | 0.533717964  | 0.695 | 0.355 | 3.09E-16    | X  | #N/A | #N/A        |
| TBCA      | 7.50E-18    | 0.533241044  | 0.683 | 0.371 | 3.33E-13    | 5  | #N/A | #N/A        |
| PRDX5     | 5.25E-21    | 0.532404264  | 0.721 | 0.377 | 2.33E-16    | 11 | #N/A | #N/A        |
| GPX3      | 3.50E-18    | 0.531875374  | 0.179 | 0.035 | 1.56E-13    | 5  | #N/A | #N/A        |
| RHOB      | 2.25E-18    | 0.5318292    | 0.279 | 0.081 | 9.99E-14    | 2  | #N/A | #N/A        |
| HPRT1     | 1.12E-17    | 0.529664927  | 0.748 | 0.462 | 4.97E-13    | X  | YES  | MGI:3831277 |
| NDUFA7    | 1.07E-19    | 0.529456891  | 0.351 | 0.114 | 4.75E-15    | 19 | #N/A | #N/A        |
| TBCB      | 1.82E-23    | 0.528649159  | 0.485 | 0.173 | 8.10E-19    | 19 | #N/A | #N/A        |
| RPS11     | 1.64E-29    | 0.527226579  | 0.939 | 0.766 | 7.29E-25    | 19 | #N/A | #N/A        |
| STRAP     | 3.25E-21    | 0.527032469  | 0.424 | 0.15  | 1.44E-16    | 12 | #N/A | #N/A        |
| OAZ1      | 9.77E-25    | 0.526877197  | 0.908 | 0.603 | 4.34E-20    | 19 | #N/A | #N/A        |
| MIR4458HG | 3.72E-20    | 0.526060994  | 0.248 | 0.059 | 1.65E-15    | 5  | #N/A | #N/A        |
| RARRES2   | 3.24E-23    | 0.525761435  | 0.126 | 0.008 | 1.44E-18    | 7  | #N/A | #N/A        |
| MRFAP1    | 4.31E-19    | 0.525371763  | 0.706 | 0.389 | 1.92E-14    | 4  | #N/A | #N/A        |
| C7orf73   | 5.31E-17    | 0.524919035  | 0.672 | 0.379 | 2.36E-12    | 7  | #N/A | #N/A        |
| ANAPC13   | 4.17E-15    | 0.523962412  | 0.313 | 0.117 | 1.85E-10    | 3  | #N/A | #N/A        |
| PGLS      | 6.07E-22    | 0.523027931  | 0.359 | 0.109 | 2.70E-17    | 19 | #N/A | #N/A        |
| TCEAL8    | 2.21E-17    | 0.522670039  | 0.622 | 0.321 | 9.84E-13    | X  | YES  | #N/A        |
| UBE2E3    | 6.45E-22    | 0.522531637  | 0.519 | 0.206 | 2.87E-17    | 2  | #N/A | #N/A        |
| SMARCB1   | 2.94E-21    | 0.522229631  | 0.294 | 0.078 | 1.31E-16    | 22 | #N/A | MGI:2388033 |
| HMGCS2    | 2.28E-16    | 0.522051231  | 0.427 | 0.183 | 1.01E-11    | 1  | #N/A | MGI:6416129 |
| C19orf53  | 3.71E-16    | 0.521640212  | 0.515 | 0.245 | 1.65E-11    | 19 | #N/A | #N/A        |
| LGALS3BP  | 9.16E-12    | 0.52119749   | 0.244 | 0.092 | 4.07E-07    | 17 | #N/A | #N/A        |
| HMG1      | 2.92E-19    | 0.521145463  | 0.718 | 0.38  | 1.30E-14    | 21 | #N/A | #N/A        |
| RAP1B     | 1.03E-16    | 0.521058619  | 0.439 | 0.188 | 4.60E-12    | 12 | #N/A | MGI:3573929 |
| CYR61     | 6.76E-05    | 0.520858252  | 0.115 | 0.05  | 1           | 1  | #N/A | #N/A        |
| OSTF1     | 9.35E-21    | 0.520729557  | 0.34  | 0.104 | 4.16E-16    | 9  | #N/A | #N/A        |
| ALDH1A1   | 2.99E-21    | 0.520057302  | 0.866 | 0.559 | 1.33E-16    | 9  | #N/A | #N/A        |
| MRPL24    | 4.41E-22    | 0.519948946  | 0.252 | 0.055 | 1.96E-17    | 1  | #N/A | #N/A        |
| CMAS      | 1.02E-16    | 0.5155785    | 0.656 | 0.356 | 4.53E-12    | 12 | #N/A | #N/A        |
| TXN       | 6.75E-20    | 0.514538757  | 0.481 | 0.194 | 3.00E-15    | 9  | #N/A | #N/A        |
| RPL22L1   | 2.64E-15    | 0.513712163  | 0.252 | 0.079 | 1.17E-10    | 3  | #N/A | #N/A        |
| ARF4      | 5.30E-19    | 0.513451676  | 0.649 | 0.315 | 2.36E-14    | 3  | #N/A | #N/A        |
| HNRNPDL   | 6.80E-20    | 0.512163047  | 0.481 | 0.193 | 3.02E-15    | 4  | #N/A | #N/A        |
| LGALS3    | 3.78E-15    | 0.51210717   | 0.679 | 0.414 | 1.68E-10    | 14 | #N/A | #N/A        |
| GNG5      | 7.80E-18    | 0.51146347   | 0.721 | 0.397 | 3.47E-13    | 1  | #N/A | #N/A        |
| RPL32     | 7.45E-33    | 0.511251563  | 0.947 | 0.87  | 3.31E-28    | 3  | #N/A | #N/A        |
| BEX2      | 3.93E-18    | 0.510970719  | 0.66  | 0.347 | 1.75E-13    | X  | YES  | #N/A        |
| SNRPD2    | 3.03E-18    | 0.51057216   | 0.645 | 0.34  | 1.35E-13    | 19 | #N/A | #N/A        |
| MDH2      | 1.09E-16    | 0.510413061  | 0.477 | 0.21  | 4.83E-12    | 7  | #N/A | #N/A        |
| S100A13   | 6.38E-13    | 0.510043278  | 0.328 | 0.136 | 2.84E-08    | 1  | #N/A | #N/A        |
| UNC119    | 3.37E-18    | 0.509541676  | 0.473 | 0.201 | 1.50E-13    | 17 | #N/A | #N/A        |
| NAP1L1    | 2.60E-18    | 0.508941593  | 0.672 | 0.355 | 1.16E-13    | 12 | #N/A | #N/A        |
| NDUFS3    | 2.77E-25    | 0.507973079  | 0.431 | 0.134 | 1.23E-20    | 11 | #N/A | #N/A        |
| TMEM14B   | 1.95E-21    | 0.507933945  | 0.542 | 0.229 | 8.66E-17    | 6  | #N/A | #N/A        |
| PPP1CA    | 2.46E-21    | 0.507065923  | 0.37  | 0.118 | 1.09E-16    | 11 | #N/A | #N/A        |
| BTG3      | 1.64E-21    | 0.506943222  | 0.55  | 0.231 | 7.27E-17    | 21 | #N/A | #N/A        |
| NOP16     | 4.62E-21    | 0.506438149  | 0.183 | 0.029 | 2.05E-16    | 5  | #N/A | #N/A        |
| EDF1      | 3.99E-18    | 0.500771927  | 0.718 | 0.409 | 1.77E-13    | 9  | #N/A | #N/A        |
| COX6B1    | 1.88E-18    | 0.500653052  | 0.649 | 0.323 | 8.38E-14    | 19 | #N/A | #N/A        |
| NUDT11    | 2.63E-19    | 0.500212558  | 0.584 | 0.269 | 1.17E-14    | X  | YES  | #N/A        |
| AGFG1     | 2.11E-05    | -0.502384732 | 0.031 | 0.117 | 0.938673003 | 2  | #N/A | #N/A        |
| ARID4B    | 9.15E-05    | -0.502451719 | 0.073 | 0.164 | 1           | 1  | #N/A | #N/A        |
| CWC15     | 0.010892165 | -0.503260557 | 0.317 | 0.345 | 1           | 11 | #N/A | #N/A        |
| ID4       | 0.003114853 | -0.512221788 | 0.141 | 0.206 | 1           | 6  | #N/A | #N/A        |
| YJEFN3    | 1.92E-06    | -0.512283888 | 0.011 | 0.103 | 0.085127668 | 19 | #N/A | #N/A        |
| UBL3      | 0.019233015 | -0.51245282  | 0.16  | 0.207 | 1           | 13 | #N/A | #N/A        |
| PABPC1    | 0.000151567 | -0.512718453 | 0.412 | 0.455 | 1           | 8  | #N/A | #N/A        |
| SYCE3     | 3.46E-06    | -0.517717631 | 0.015 | 0.105 | 0.153976155 | 22 | #N/A | #N/A        |
| EEF2KMT   | 0.000147039 | -0.519188591 | 0.031 | 0.103 | 1           | 16 | #N/A | #N/A        |
| CCK       | 6.10E-08    | -0.52101868  | 0.008 | 0.118 | 0.002711426 | 3  | #N/A | #N/A        |
| CHPT1     | 2.19E-06    | -0.521935494 | 0.027 | 0.127 | 0.097270627 | 12 | #N/A | #N/A        |
| NAA38     | 0.003576492 | -0.524364733 | 0.225 | 0.287 | 1           | 17 | #N/A | #N/A        |
| HABP4     | 5.17E-05    | -0.526401758 | 0.034 | 0.116 | 1           | 9  | #N/A | #N/A        |
| BACE1     | 5.11E-06    | -0.527557388 | 0.023 | 0.115 | 0.227367456 | 11 | #N/A | #N/A        |
| TXNL4A    | 0.002377515 | -0.529336769 | 0.149 | 0.218 | 1           | 18 | #N/A | #N/A        |
| RAD17     | 0.000133708 | -0.52956578  | 0.05  | 0.13  | 1           | 5  | #N/A | #N/A        |
| DDX3Y     | 0.003418666 | -0.529997513 | 0.095 | 0.159 | 1           | Y  | #N/A | #N/A        |
| SLAIN2    | 2.20E-07    | -0.531262112 | 0.011 | 0.116 | 0.009777367 | 4  | #N/A | #N/A        |
| EHP1      | 2.81E-05    | -0.534057284 | 0.027 | 0.109 | 1           | 2  | #N/A | #N/A        |



|           |             |              |       |       |             |    |      |
|-----------|-------------|--------------|-------|-------|-------------|----|------|
| CCDC90B   | 0.003780353 | -0.535845686 | 0.26  | 0.311 | 1           | 11 | #N/A |
| CCDC88A   | 1.11E-05    | -0.545850619 | 0.057 | 0.16  | 0.494837465 | 2  | #N/A |
| HMOX2     | 0.000438496 | -0.548305872 | 0.118 | 0.203 | 1           | 16 | #N/A |
| ATP6V1A   | 0.001241527 | -0.548844351 | 0.08  | 0.151 | 1           | 3  | #N/A |
| C4orf36   | 5.19E-08    | -0.550053758 | 0.004 | 0.111 | 0.002305343 | 4  | #N/A |
| RAD23B    | 0.000937666 | -0.554216561 | 0.153 | 0.23  | 1           | 9  | #N/A |
| TRIP12    | 0.000159371 | -0.555405096 | 0.069 | 0.153 | 1           | 2  | #N/A |
| DESI2     | 1.01E-05    | -0.555908236 | 0.065 | 0.169 | 0.44729994  | 1  | #N/A |
| CNN1      | 2.86E-06    | -0.559805234 | 0.027 | 0.125 | 0.12730653  | 19 | #N/A |
| DGCR6     | 4.27E-06    | -0.564107218 | 0.019 | 0.109 | 0.189711363 | 22 | #N/A |
| MRPL41    | 6.96E-05    | -0.564282362 | 0.137 | 0.238 | 1           | 9  | #N/A |
| HSP90AA1  | 4.27E-07    | -0.56476345  | 0.595 | 0.6   | 0.018985347 | 14 | #N/A |
| LRRD1     | 1.23E-07    | -0.565002802 | 0.008 | 0.114 | 0.005456008 | 7  | #N/A |
| C1QTNF3   | 1.62E-06    | -0.569392274 | 0.011 | 0.104 | 0.072232275 | 5  | #N/A |
| FHL1      | 2.58E-06    | -0.571881353 | 0.031 | 0.131 | 0.114535957 | X  | YES  |
| CA2       | 5.79E-05    | -0.575141477 | 0.038 | 0.121 | 1           | 8  | #N/A |
| FAM71F2   | 2.75E-07    | -0.576510727 | 0.004 | 0.101 | 0.012234163 | 7  | #N/A |
| RBL2      | 1.81E-06    | -0.581511772 | 0.027 | 0.127 | 0.080343172 | 16 | #N/A |
| TNFAIP8L1 | 5.21E-08    | -0.583702737 | 0.011 | 0.126 | 0.002315082 | 19 | #N/A |
| RNF168    | 1.12E-05    | -0.584474727 | 0.027 | 0.115 | 0.496259087 | 3  | #N/A |
| LYL1      | 1.19E-07    | -0.589429567 | 0.011 | 0.12  | 0.005276261 | 19 | #N/A |
| UBXN4     | 0.000309657 | -0.593600053 | 0.202 | 0.286 | 1           | 2  | #N/A |
| GMPS      | 0.00010457  | -0.594917114 | 0.115 | 0.209 | 1           | 3  | #N/A |
| ACP1      | 3.14E-05    | -0.599637699 | 0.397 | 0.458 | 1           | 2  | #N/A |
| CDHR2     | 1.06E-08    | -0.610524633 | 0     | 0.114 | 0.000471547 | 5  | #N/A |
| MSTO1     | 1.68E-07    | -0.6107142   | 0.019 | 0.131 | 0.00745382  | 1  | #N/A |
| PSORS1C1  | 2.09E-08    | -0.620021986 | 0.004 | 0.117 | 0.000928487 | 6  | #N/A |
| TUBA3D    | 2.83E-07    | -0.623128299 | 0.011 | 0.114 | 0.01256926  | 2  | #N/A |
| GNAS      | 3.22E-10    | -0.626154279 | 0.477 | 0.572 | 1.43E-05    | 20 | #N/A |
| LARP1B    | 5.95E-07    | -0.631334799 | 0.023 | 0.129 | 0.026465043 | 4  | #N/A |
| RIBC1     | 2.64E-08    | -0.631628367 | 0     | 0.108 | 0.001171583 | X  | #N/A |
| GLIPR1L2  | 9.51E-08    | -0.636545215 | 0.004 | 0.107 | 0.004228299 | 12 | #N/A |
| YWHAZ     | 3.85E-06    | -0.638013367 | 0.332 | 0.427 | 0.170978343 | 8  | #N/A |
| GLRX5     | 2.20E-06    | -0.645357845 | 0.252 | 0.366 | 0.097972753 | 14 | #N/A |
| KHDRBS3   | 2.68E-06    | -0.649117873 | 0.092 | 0.21  | 0.11921951  | 8  | #N/A |
| HIP1      | 9.93E-08    | -0.651267207 | 0.015 | 0.127 | 0.004415863 | 7  | #N/A |
| FAM76B    | 4.50E-08    | -0.652350614 | 0.023 | 0.145 | 0.001999779 | 11 | #N/A |
| UBE2J1    | 1.56E-05    | -0.65453323  | 0.103 | 0.209 | 0.695086401 | 6  | #N/A |
| HYPM      | 1.95E-08    | -0.65542152  | 0     | 0.11  | 0.000865674 | X  | YES  |
| FLJ27354  | 2.23E-06    | -0.656051213 | 0.053 | 0.164 | 0.099014051 | 1  | #N/A |
| NOL10     | 6.00E-07    | -0.665891307 | 0.019 | 0.121 | 0.026656036 | 2  | #N/A |
| TMEM53    | 6.78E-09    | -0.66704471  | 0.008 | 0.132 | 0.000301599 | 1  | #N/A |
| DNAJC21   | 1.17E-06    | -0.66941647  | 0.069 | 0.186 | 0.052114269 | 5  | #N/A |
| RAB21     | 1.13E-06    | -0.673876853 | 0.073 | 0.193 | 0.050038157 | 12 | #N/A |
| METAP1    | 0.000150598 | -0.675162442 | 0.115 | 0.203 | 1           | 4  | #N/A |
| ACAP1     | 4.25E-05    | -0.683423036 | 0.103 | 0.201 | 1           | 17 | #N/A |
| DGCR6L    | 7.90E-05    | -0.685158513 | 0.26  | 0.341 | 1           | 22 | #N/A |
| MRGBP     | 1.62E-08    | -0.686051284 | 0.042 | 0.18  | 0.000719337 | 20 | #N/A |
| GSKIP     | 4.43E-07    | -0.688836888 | 0.034 | 0.147 | 0.019703752 | 14 | #N/A |
| PARD6A    | 1.95E-07    | -0.688841276 | 0.011 | 0.116 | 0.008672097 | 16 | #N/A |
| ZNF91     | 2.83E-07    | -0.689835878 | 0.053 | 0.176 | 0.012591831 | 19 | #N/A |
| SURF2     | 1.78E-06    | -0.701116757 | 0.092 | 0.211 | 0.079259553 | 9  | #N/A |
| SYPL1     | 5.61E-08    | -0.703708406 | 0.107 | 0.255 | 0.002491992 | 7  | #N/A |
| UBTD2     | 1.43E-07    | -0.705296005 | 0.05  | 0.175 | 0.0063406   | 5  | #N/A |
| PAQR7     | 1.93E-06    | -0.705373003 | 0.164 | 0.288 | 0.085852107 | 1  | #N/A |
| LPP       | 2.22E-07    | -0.710341614 | 0.088 | 0.221 | 0.009872936 | 3  | #N/A |
| C15orf48  | 3.46E-08    | -0.710947433 | 0.011 | 0.127 | 0.001538103 | 15 | #N/A |
| SRPK1     | 2.99E-09    | -0.720319594 | 0.023 | 0.161 | 0.00013275  | 6  | #N/A |
| GOLM1     | 5.05E-09    | -0.722509724 | 0.008 | 0.133 | 0.000224599 | 9  | #N/A |
| BZW1      | 4.77E-09    | -0.725530465 | 0.42  | 0.513 | 0.000212185 | 2  | #N/A |
| LSM14B    | 3.24E-09    | -0.728263014 | 0.023 | 0.16  | 0.000143979 | 20 | #N/A |
| EFHD2     | 1.47E-07    | -0.731722191 | 0.29  | 0.402 | 0.006553754 | 1  | #N/A |
| SBDS      | 5.13E-06    | -0.732088416 | 0.256 | 0.356 | 0.227967374 | 7  | #N/A |
| GOLGA4    | 1.73E-07    | -0.735801707 | 0.073 | 0.202 | 0.007694417 | 3  | #N/A |
| LURAP1    | 2.39E-09    | -0.741541286 | 0.004 | 0.13  | 0.000106434 | 1  | #N/A |
| LYPLA1    | 4.32E-07    | -0.751053658 | 0.263 | 0.378 | 0.019192199 | 8  | #N/A |
| TPR       | 6.46E-08    | -0.763962997 | 0.069 | 0.204 | 0.00287086  | 1  | #N/A |
| PCM1      | 1.25E-07    | -0.7664025   | 0.053 | 0.181 | 0.005566523 | 8  | #N/A |
| LRRFIP2   | 5.21E-08    | -0.768059316 | 0.042 | 0.169 | 0.002316503 | 3  | #N/A |
| CSNK2A2   | 1.01E-10    | -0.769279495 | 0.023 | 0.18  | 4.48E-06    | 16 | #N/A |
| ZFAND3    | 1.34E-06    | -0.784689842 | 0.16  | 0.281 | 0.059518815 | 6  | #N/A |
| C5orf52   | 1.20E-10    | -0.807297139 | 0.004 | 0.148 | 5.32E-06    | 5  | #N/A |
| UBE2S     | 1.09E-08    | -0.814206878 | 0.126 | 0.277 | 0.000482723 | 19 | #N/A |
| CDC34     | 2.32E-11    | -0.814795502 | 0.034 | 0.208 | 1.03E-06    | 19 | #N/A |
| CENPU     | 4.94E-10    | -0.818260166 | 0.023 | 0.17  | 2.20E-05    | 4  | #N/A |

|           |          |              |       |       |             |    |      |
|-----------|----------|--------------|-------|-------|-------------|----|------|
| MIR193BHG | 1.99E-10 | -0.818675853 | 0.004 | 0.145 | 8.83E-06    | 16 | #N/A |
| ATP1B3    | 3.42E-09 | -0.820270581 | 0.05  | 0.198 | 0.000152107 | 3  | #N/A |
| BRI3      | 3.81E-10 | -0.828211854 | 0.149 | 0.323 | 1.69E-05    | 7  | #N/A |
| CDV3      | 4.71E-09 | -0.832071805 | 0.149 | 0.304 | 0.000209473 | 3  | #N/A |
| MZT2B     | 3.36E-15 | -0.836934685 | 0.385 | 0.548 | 1.49E-10    | 2  | #N/A |
| FXR1      | 1.92E-10 | -0.838746639 | 0.191 | 0.366 | 8.53E-06    | 3  | #N/A |
| MAP2K2    | 1.38E-09 | -0.840975744 | 0.08  | 0.243 | 6.13E-05    | 19 | #N/A |
| AKAP14    | 1.43E-11 | -0.846386342 | 0.011 | 0.175 | 6.36E-07    | X  | YES  |
| EIF4H     | 1.63E-10 | -0.848383596 | 0.137 | 0.318 | 7.25E-06    | 7  | #N/A |
| CTAG2     | 4.55E-11 | -0.858834075 | 0     | 0.147 | 2.02E-06    | X  | YES  |
| SPATA8    | 3.02E-11 | -0.866210618 | 0.015 | 0.175 | 1.34E-06    | 15 | #N/A |
| RPL39L    | 4.13E-09 | -0.86802526  | 0.103 | 0.26  | 0.000183719 | 3  | #N/A |
| AKIRIN1   | 1.53E-11 | -0.868355448 | 0.294 | 0.457 | 6.82E-07    | 1  | #N/A |
| MEX3D     | 1.57E-11 | -0.88008399  | 0.031 | 0.202 | 7.00E-07    | 19 | #N/A |
| DDX4      | 3.93E-12 | -0.887476601 | 0.008 | 0.174 | 1.75E-07    | 5  | #N/A |
| AKAP12    | 1.87E-10 | -0.899768438 | 0.168 | 0.338 | 8.32E-06    | 6  | #N/A |
| COX8C     | 7.63E-14 | -0.968006575 | 0.008 | 0.196 | 3.39E-09    | 14 | #N/A |
| SPATA22   | 1.87E-14 | -0.992093615 | 0.015 | 0.216 | 8.31E-10    | 17 | #N/A |
| TUBA3C    | 1.61E-13 | -1.009931024 | 0.023 | 0.216 | 7.17E-09    | 13 | #N/A |
| HIST1H2AA | 2.31E-15 | -1.030077128 | 0.004 | 0.209 | 1.03E-10    | 6  | #N/A |
| PRKAR2A   | 6.95E-16 | -1.074657101 | 0.015 | 0.233 | 3.09E-11    | 3  | #N/A |
| COPRS     | 5.22E-16 | -1.136428068 | 0.08  | 0.315 | 2.32E-11    | 17 | #N/A |
| BAG1      | 1.22E-21 | -1.167388369 | 0.237 | 0.508 | 5.43E-17    | 9  | #N/A |
| CRNDE     | 3.63E-20 | -1.195177687 | 0.023 | 0.295 | 1.61E-15    | 16 | #N/A |
| PGP       | 4.98E-19 | -1.229070865 | 0.153 | 0.419 | 2.22E-14    | 16 | #N/A |
| DYNLL2    | 5.77E-21 | -1.282115547 | 0.092 | 0.38  | 2.56E-16    | 17 | #N/A |

## logFC&gt;1

|           | p_val     | avg_logFC    | pct.1 | pct.2 | p_val_adj | CHRO | NXI GENE | MGI database |
|-----------|-----------|--------------|-------|-------|-----------|------|----------|--------------|
| MIF       | 3.03E-103 | 1.671323685  | 0.84  | 0.234 | 1.35E-98  | 22   | #N/A     | #N/A         |
| RPL36A    | 4.64E-100 | 1.637040069  | 0.821 | 0.203 | 2.06E-95  | X    | YES      | #N/A         |
| RPL17     | 1.98E-91  | 1.441726647  | 0.805 | 0.195 | 8.78E-87  | 18   | #N/A     | #N/A         |
| RPS17     | 8.35E-95  | 1.372976856  | 0.943 | 0.443 | 3.71E-90  | 15   | #N/A     | #N/A         |
| RPS21     | 3.87E-97  | 1.370619916  | 0.958 | 0.543 | 1.72E-92  | 20   | #N/A     | #N/A         |
| RPL31     | 4.33E-92  | 1.283515584  | 0.969 | 0.581 | 1.92E-87  | 2    | #N/A     | #N/A         |
| RPL41     | 3.92E-107 | 1.259251934  | 0.996 | 0.87  | 1.74E-102 | 12   | #N/A     | #N/A         |
| ACTB      | 1.44E-93  | 1.249763766  | 0.989 | 0.671 | 6.42E-89  | 7    | #N/A     | MGI:3032619  |
| PPDPF     | 6.76E-72  | 1.231577355  | 0.901 | 0.496 | 3.00E-67  | 20   | #N/A     | #N/A         |
| MYL9      | 1.01E-66  | 1.142708652  | 0.847 | 0.348 | 4.51E-62  | 20   | #N/A     | #N/A         |
| TMSB4X    | 1.78E-51  | 1.118016852  | 0.595 | 0.153 | 7.90E-47  | X    | YES      | #N/A         |
| HBA2      | 2.99E-17  | 1.115361017  | 0.107 | 0.009 | 1.33E-12  | 16   | #N/A     | #N/A         |
| CD99      | 2.53E-42  | 1.113285902  | 0.706 | 0.277 | 1.12E-37  | X    | #N/A     | #N/A         |
| PFN1      | 6.90E-63  | 1.112166688  | 0.63  | 0.143 | 3.07E-58  | 17   | #N/A     | #N/A         |
| UQCRQ     | 3.64E-51  | 1.106819589  | 0.779 | 0.338 | 1.62E-46  | 5    | #N/A     | #N/A         |
| RPS29     | 7.93E-95  | 1.099929341  | 0.985 | 0.804 | 3.52E-90  | 14   | #N/A     | #N/A         |
| RPL38     | 1.22E-90  | 1.08572825   | 0.973 | 0.752 | 5.44E-86  | 17   | #N/A     | MGI:1861228  |
| SLC25A6   | 1.60E-60  | 1.069852721  | 0.771 | 0.27  | 7.10E-56  | X    | #N/A     | #N/A         |
| RPLP2     | 2.43E-86  | 1.065571463  | 0.985 | 0.721 | 1.08E-81  | 11   | #N/A     | #N/A         |
| RPL39     | 2.36E-77  | 1.065287085  | 0.973 | 0.69  | 1.05E-72  | X    | YES      | #N/A         |
| RPS26     | 9.79E-66  | 1.060555127  | 0.92  | 0.562 | 4.35E-61  | 12   | #N/A     | #N/A         |
| NDUFA11   | 6.30E-56  | 1.040904442  | 0.771 | 0.297 | 2.80E-51  | 19   | #N/A     | #N/A         |
| MIR202HG  | 1.89E-55  | 1.030651325  | 0.947 | 0.63  | 8.41E-51  | 10   | #N/A     | #N/A         |
| BEX1      | 2.66E-64  | 1.0296462    | 0.935 | 0.54  | 1.18E-59  | X    | YES      | #N/A         |
| EEF1A1    | 5.48E-112 | 1.025445711  | 0.996 | 0.942 | 2.44E-107 | 6    | #N/A     | #N/A         |
| USMG5     | 3.05E-65  | 1.017202599  | 0.916 | 0.543 | 1.35E-60  | 10   | #N/A     | #N/A         |
| G6PD      | 4.45E-48  | 1.01585106   | 0.702 | 0.247 | 1.98E-43  | X    | YES      | #N/A         |
| RPL37     | 1.47E-66  | 1.013673993  | 0.95  | 0.675 | 6.54E-62  | 5    | #N/A     | #N/A         |
| RPS27     | 2.48E-91  | 1.009652287  | 0.985 | 0.882 | 1.10E-86  | 1    | #N/A     | #N/A         |
| TUBA3C    | 1.61E-13  | -1.009931024 | 0.023 | 0.216 | 7.17E-09  | 13   | #N/A     | #N/A         |
| HIST1H2AA | 2.31E-15  | -1.030077128 | 0.004 | 0.209 | 1.03E-10  | 6    | #N/A     | #N/A         |
| PRKAR2A   | 6.95E-16  | -1.074657101 | 0.015 | 0.233 | 3.09E-11  | 3    | #N/A     | #N/A         |
| COPRS     | 5.22E-16  | -1.136428068 | 0.08  | 0.315 | 2.32E-11  | 17   | #N/A     | #N/A         |
| BAG1      | 1.22E-21  | -1.167388369 | 0.237 | 0.508 | 5.43E-17  | 9    | #N/A     | #N/A         |
| CRNDE     | 3.63E-20  | -1.195177687 | 0.023 | 0.295 | 1.61E-15  | 16   | #N/A     | #N/A         |
| PGP       | 4.98E-19  | -1.229070865 | 0.153 | 0.419 | 2.22E-14  | 16   | #N/A     | #N/A         |
| DYNLL2    | 5.77E-21  | -1.282115547 | 0.092 | 0.38  | 2.56E-16  | 17   | #N/A     | #N/A         |
